# Supplementary material for: Proteogenomic analysis of cancer aneuploidy and normal tissues reveals divergent modes of gene regulation across cellular pathways
Source: eLife. 2022 Sep 21;11:e75227. doi: 10.7554/eLife.75227 (PMC9491860; doi:10.7554/eLife.75227)
Supplement: Supplementary file 1. [file elife-75227-supp1.xlsx]

## Sheet: 1A_CPTAC_patient_gene_number
	CNV	RNA	Protein	Patient
COAD	25187	13482	7572	95
BRCA	23692	23121	10107	87
OV	17156	21991	10686	81
ccRCC	19285	19275	11710	110
UCEC	28057	28057	10999	95
HNSC	59013	38456	11744	107
LUAD	19267	18099	10699	109

## Sheet: 1B_compensation score_CPTAC_all
Table S1B: compensation scores in different SCNA groups of CPTAC samples - pan-cancer, their 95% confidential interval, p-values and FDR values for two-tail or one-tail (H0: the CS are not bigger than 0) statistical tests.
levels	group	CORUM	CI	pValue_twoTail	FDR_twoTail	pValue_oneTail	FDR_oneTail
RNA	gain	CORUM	( -0.0568, -0.0494 )	1e-16	2.66667e-16	1	1
RNA	gain	NoCORUM	( -0.0303, -0.0244 )	1e-16	2.66667e-16	1	1
RNA	high gain	CORUM	( 0.1051, 0.1332 )	0.0001	0.0001	9.999e-05	0.000159984
RNA	high gain	NoCORUM	( 0.1622, 0.1839 )	0.0001	0.0001	9.999e-05	0.000159984
RNA	loss	CORUM	( -0.0632, -0.057 )	1e-16	2.66667e-16	1	1
RNA	loss	NoCORUM	( -0.0625, -0.0576 )	1e-16	2.66667e-16	1	1
RNA	deep loss	CORUM	( -0.0831, -0.0525 )	1e-16	2.66667e-16	1	1
RNA	deep loss	NoCORUM	( -0.0837, -0.0609 )	1e-16	2.66667e-16	1	1
Protein	gain	CORUM	( 0.1907, 0.1972 )	0.0001	0.0001	9.999e-05	0.000159984
Protein	gain	NoCORUM	( 0.15, 0.1555 )	0.0001	0.0001	9.999e-05	0.000159984
Protein	high gain	CORUM	( 0.6367, 0.6588 )	0.0001	0.0001	9.999e-05	0.000159984
Protein	high gain	NoCORUM	( 0.5253, 0.544 )	0.0001	0.0001	9.999e-05	0.000159984
Protein	loss	CORUM	( 0.183, 0.1881 )	0.0001	0.0001	9.999e-05	0.000159984
Protein	loss	NoCORUM	( 0.1346, 0.1391 )	0.0001	0.0001	9.999e-05	0.000159984
Protein	deep loss	CORUM	( 0.4633, 0.4874 )	0.0001	0.0001	9.999e-05	0.000159984
Protein	deep loss	NoCORUM	( 0.3563, 0.3746 )	0.0001	0.0001	9.999e-05	0.000159984

## Sheet: 1C_compensation score_CPTAC_ind
Table S1C: compensation scores in different SCNA groups of CPTAC samples, their 95% confidential interval, p-values and FDR values for one-tail (H0: the CS are not bigger than 0) statistical tests.
compensation scores in different groups of COAD, their 95% confidential interval, p-values and FDR values for one-tail (H0: the CS are not bigger than 0)
levels	conditions	CORUM	CI	pValue	FDR
RNA	gain	CORUM	( 0.1169, 0.1309 )	9.999e-05	0.000106656
RNA	gain	NoCORUM	( 0.1209, 0.1326 )	9.999e-05	0.000106656
RNA	high gain	CORUM	( 0.4426, 0.4719 )	9.999e-05	0.000106656
RNA	high gain	NoCORUM	( 0.4522, 0.4766 )	9.999e-05	0.000106656
RNA	loss	CORUM	( 0.1006, 0.1125 )	9.999e-05	0.000106656
RNA	loss	NoCORUM	( 0.0903, 0.1004 )	9.999e-05	0.000106656
RNA	deep loss	CORUM	( 0.0138, 0.0609 )	0.00259974	0.00259974
RNA	deep loss	NoCORUM	( 0.0287, 0.0695 )	9.999e-05	0.000106656
Protein	gain	CORUM	( 0.2885, 0.2973 )	9.999e-05	0.000106656
Protein	gain	NoCORUM	( 0.2633, 0.2714 )	9.999e-05	0.000106656
Protein	high gain	CORUM	( 0.842, 0.869 )	9.999e-05	0.000106656
Protein	high gain	NoCORUM	( 0.7834, 0.805 )	9.999e-05	0.000106656
Protein	loss	CORUM	( 0.267, 0.2745 )	9.999e-05	0.000106656
Protein	loss	NoCORUM	( 0.2505, 0.2578 )	9.999e-05	0.000106656
Protein	deep loss	CORUM	( 0.497, 0.5256 )	9.999e-05	0.000106656
Protein	deep loss	NoCORUM	( 0.4417, 0.4686 )	9.999e-05	0.000106656
compensation scores in different SCNA groups of CPTAC ccRCC samples, their 95% confidential interval, p-values and FDR values for one-tail (H0: the CS are not bigger than 0) statistical tests.
levels	conditions	CORUM	CI	pValue	FDR
RNA	gain	CORUM	( -0.0397, -0.0271 )	1	1
RNA	gain	NoCORUM	( -0.0127, -0.0028 )	0.9994	1
RNA	high gain	CORUM	( -0.1655, -0.0186 )	0.9977	1
RNA	high gain	NoCORUM	( -0.1738, -0.0808 )	1	1
RNA	loss	CORUM	( -0.0249, -0.0136 )	1	1
RNA	loss	NoCORUM	( -0.0067, 0.0025 )	0.846615	1
RNA	deep loss	CORUM	( 0.1563, 0.2281 )	9.999e-05	0.000159984
RNA	deep loss	NoCORUM	( 0.1751, 0.2316 )	9.999e-05	0.000159984
Protein	gain	CORUM	( 0.1987, 0.2064 )	9.999e-05	0.000159984
Protein	gain	NoCORUM	( 0.1642, 0.1718 )	9.999e-05	0.000159984
Protein	high gain	CORUM	( 0.525, 0.5906 )	9.999e-05	0.000159984
Protein	high gain	NoCORUM	( 0.446, 0.5034 )	9.999e-05	0.000159984
Protein	loss	CORUM	( 0.2404, 0.2484 )	9.999e-05	0.000159984
Protein	loss	NoCORUM	( 0.2186, 0.225 )	9.999e-05	0.000159984
Protein	deep loss	CORUM	( 0.548, 0.6057 )	9.999e-05	0.000159984
Protein	deep loss	NoCORUM	( 0.5035, 0.5505 )	9.999e-05	0.000159984
compensation scores in different SCNA groups of CPTAC BRCA samples, their 95% confidential interval, p-values and FDR values for one-tail (H0: the CS are not bigger than 0) statistical tests.
levels	conditions	CORUM	CI	pValue	FDR
RNA	gain	CORUM	( -0.0929, -0.0683 )	1	1
RNA	gain	NoCORUM	( -0.0497, -0.0299 )	1	1
RNA	high gain	CORUM	( 0.043, 0.0859 )	9.999e-05	0.000228549
RNA	high gain	NoCORUM	( 0.1791, 0.2163 )	9.999e-05	0.000228549
RNA	loss	CORUM	( -0.287, -0.2678 )	1	1
RNA	loss	NoCORUM	( -0.2854, -0.2703 )	1	1
RNA	deep loss	CORUM	( -0.3592, -0.3054 )	1	1
RNA	deep loss	NoCORUM	( -0.4097, -0.3623 )	1	1
Protein	gain	CORUM	( 0.1375, 0.1638 )	9.999e-05	0.000228549
Protein	gain	NoCORUM	( 0.0847, 0.1055 )	9.999e-05	0.000228549
Protein	high gain	CORUM	( 0.5515, 0.599 )	9.999e-05	0.000228549
Protein	high gain	NoCORUM	( 0.47, 0.5131 )	9.999e-05	0.000228549
Protein	loss	CORUM	( 0.0118, 0.0337 )	0.00019998	0.00039996
Protein	loss	NoCORUM	( -0.0848, -0.0676 )	1	1
Protein	deep loss	CORUM	( 0.2035, 0.2789 )	9.999e-05	0.000228549
Protein	deep loss	NoCORUM	( -0.0355, 0.013 )	0.783722	1
compensation scores in different SCNA groups of CPTAC OV samples, their 95% confidential interval, p-values and FDR values for one-tail (H0: the CS are not bigger than 0) statistical tests.
levels	conditions	CORUM	CI	pValue	FDR
RNA	gain	CORUM	( -0.0278, -0.0098 )	1	1
RNA	gain	NoCORUM	( 0.0243, 0.0383 )	9.999e-05	0.00013332
RNA	high gain	CORUM	( -0.0971, -0.0366 )	1	1
RNA	high gain	NoCORUM	( 0.0267, 0.0661 )	9.999e-05	0.00013332
RNA	loss	CORUM	( -0.0259, -0.0135 )	1	1
RNA	loss	NoCORUM	( 0.0375, 0.0469 )	9.999e-05	0.00013332
RNA	deep loss	CORUM	( -0.0094, 0.033 )	0.133787	0.16466
RNA	deep loss	NoCORUM	( 0.0794, 0.1073 )	9.999e-05	0.00013332
Protein	gain	CORUM	( 0.2395, 0.2505 )	9.999e-05	0.00013332
Protein	gain	NoCORUM	( 0.2074, 0.216 )	9.999e-05	0.00013332
Protein	high gain	CORUM	( 0.5946, 0.6305 )	9.999e-05	0.00013332
Protein	high gain	NoCORUM	( 0.505, 0.5309 )	9.999e-05	0.00013332
Protein	loss	CORUM	( 0.2576, 0.2654 )	9.999e-05	0.00013332
Protein	loss	NoCORUM	( 0.2239, 0.2302 )	9.999e-05	0.00013332
Protein	deep loss	CORUM	( 0.5423, 0.5695 )	9.999e-05	0.00013332
Protein	deep loss	NoCORUM	( 0.455, 0.4761 )	9.999e-05	0.00013332
compensation scores in different SCNA groups of CPTAC UCEC samples, their 95% confidential interval, p-values and FDR values for one-tail (H0: the CS are not bigger than 0) statistical tests.
levels	conditions	CORUM	CI	pValue	FDR
RNA	gain	CORUM	( -0.16, -0.14 )	1	1
RNA	gain	NoCORUM	( -0.13, -0.115 )	1	1
RNA	high gain	CORUM	( -0.3525, -0.28 )	1	1
RNA	high gain	NoCORUM	( -0.25, -0.19 )	1	1
RNA	loss	CORUM	( -0.03, -0.01 )	1	1
RNA	loss	NoCORUM	( -0.05, -0.04 )	1	1
RNA	deep loss	CORUM	( -0.19, -0.06 )	1	1
RNA	deep loss	NoCORUM	( -0.14, -0.045 )	1	1
Protein	gain	CORUM	( 0.1371, 0.1545 )	9.999e-05	0.00019998
Protein	gain	NoCORUM	( 0.1079, 0.1206 )	9.999e-05	0.00019998
Protein	high gain	CORUM	( 0.4244, 0.5143 )	9.999e-05	0.00019998
Protein	high gain	NoCORUM	( 0.2948, 0.3606 )	9.999e-05	0.00019998
Protein	loss	CORUM	( 0.1922, 0.2096 )	9.999e-05	0.00019998
Protein	loss	NoCORUM	( 0.1188, 0.1319 )	9.999e-05	0.00019998
Protein	deep loss	CORUM	( 0.3992, 0.4926 )	9.999e-05	0.00019998
Protein	deep loss	NoCORUM	( 0.2657, 0.3444 )	9.999e-05	0.00019998
compensation scores in different SCNA groups of CPTAC HNSC samples, their 95% confidential interval, p-values and FDR values for one-tail (H0: the CS are not bigger than 0) statistical tests.
levels	conditions	CORUM	CI	pValue	FDR
RNA	gain	CORUM	( -0.0925, -0.0807 )	1	1
RNA	gain	NoCORUM	( -0.0394, -0.0298 )	1	1
RNA	high gain	CORUM	( -0.1721, -0.1289 )	1	1
RNA	high gain	NoCORUM	( -0.0687, -0.0194 )	1	1
RNA	loss	CORUM	( -0.1042, -0.0933 )	1	1
RNA	loss	NoCORUM	( -0.0963, -0.0877 )	1	1
RNA	deep loss	CORUM	( -0.2244, -0.1235 )	1	1
RNA	deep loss	NoCORUM	( -0.2069, -0.1368 )	1	1
Protein	gain	CORUM	( 0.1781, 0.1874 )	9.999e-05	0.00019998
Protein	gain	NoCORUM	( 0.1769, 0.1853 )	9.999e-05	0.00019998
Protein	high gain	CORUM	( 0.5846, 0.634 )	9.999e-05	0.00019998
Protein	high gain	NoCORUM	( 0.4837, 0.5251 )	9.999e-05	0.00019998
Protein	loss	CORUM	( 0.1918, 0.2008 )	9.999e-05	0.00019998
Protein	loss	NoCORUM	( 0.1352, 0.1416 )	9.999e-05	0.00019998
Protein	deep loss	CORUM	( 0.4396, 0.5209 )	9.999e-05	0.00019998
Protein	deep loss	NoCORUM	( 0.3364, 0.3968 )	9.999e-05	0.00019998
compensation scores in different SCNA groups of CPTAC LUAD samples, their 95% confidential interval, p-values and FDR values for one-tail (H0: the CS are not bigger than 0) statistical tests.
levels	conditions	CORUM	CI	pValue	FDR
RNA	gain	CORUM	( -0.1313, -0.1194 )	1	1
RNA	gain	NoCORUM	( -0.0981, -0.0898 )	1	1
RNA	high gain	CORUM	( -0.2398, -0.1811 )	1	1
RNA	high gain	NoCORUM	( -0.1986, -0.1596 )	1	1
RNA	loss	CORUM	( -0.1095, -0.099 )	1	1
RNA	loss	NoCORUM	( -0.1123, -0.1048 )	1	1
RNA	deep loss	CORUM	( -0.3009, -0.1654 )	1	1
RNA	deep loss	NoCORUM	( -0.3094, -0.2079 )	1	1
Protein	gain	CORUM	( -0.1059, -0.0806 )	1	1
Protein	gain	NoCORUM	( -0.1624, -0.1428 )	1	1
Protein	high gain	CORUM	( -0.0489, 0.0922 )	0.363464	1
Protein	high gain	NoCORUM	( -0.4089, -0.3059 )	1	1
Protein	loss	CORUM	( -0.0351, -0.0124 )	1	1
Protein	loss	NoCORUM	( -0.1208, -0.1045 )	1	1
Protein	deep loss	CORUM	( -0.1461, 0.1884 )	0.59924	1
Protein	deep loss	NoCORUM	( -0.4265, -0.1741 )	1	1

## Sheet: 1D_CORUM vs Non-CORUM_CPTAC_all
Table S1D: Comparison of the compensation scores of CORUM and non-CORUM genes in each condition (CPTAC)
levels	conditions	CORUM_NoCORUM	CI	pValue	FDR
RNA	gain	-0.0260086	( -0.0308, -0.021 )	9.999e-05	0.00016665
RNA	gain+	-0.0556083	( -0.0723, -0.0373 )	9.999e-05	0.00016665
RNA	loss	-0.000476197	( -0.004, 0.0038 )	0.793021	0.881134
RNA	loss+	0.00386731	( -0.0149, 0.0228 )	0.685231	0.856539
RNA	unchange	0.000720095	( -7e-04, 0.0021 )	0.311069	0.444384
Protein	gain	0.0409663	( 0.0367, 0.0453 )	9.999e-05	0.00016665
Protein	gain+	0.113467	( 0.0982, 0.1288 )	9.999e-05	0.00016665
Protein	loss	0.0486125	( 0.0453, 0.0521 )	9.999e-05	0.00016665
Protein	loss+	0.11019	( 0.095, 0.1251 )	9.999e-05	0.00016665
Protein	unchange	3.37147e-06	( -0.0011, 0.0011 )	0.9953	0.9953

## Sheet: 1E_CORUM vs Non-CORUM_CPTAC_ind
Table S1E: Comparison of the compensation scores of CORUM and non-CORUM genes in each condition of each kind of cancer (CPTAC)
COAD
levels	conditions	CORUM_NoCORUM	CI	pValue	FDR
RNA	gain	-0.0029	( -0.0121, 0.0063 )	0.536746	0.536746
RNA	gain+	-0.0064	( -0.0257, 0.0121 )	0.49535	0.536746
RNA	loss	0.011725	( 0.0038, 0.0191 )	0.00339966	0.00679932
RNA	loss+	-0.009875	( -0.0409, 0.0197 )	0.509949	0.536746
RNA	unchange	0.00185	( -0.0015, 0.0052 )	0.282572	0.470953
Protein	gain	0.0258	( 0.0197, 0.0319 )	9.999e-05	0.000249975
Protein	gain+	0.0593	( 0.0428, 0.0782 )	9.999e-05	0.000249975
Protein	loss	0.0165	( 0.0115, 0.0217 )	9.999e-05	0.000249975
Protein	loss+	0.058925	( 0.0375, 0.0758 )	9.999e-05	0.000249975
Protein	unchange	-0.001	( -0.0031, 0.0012 )	0.356964	0.509949
BRCA
levels	conditions	CORUM_NoCORUM	CI	pValue	FDR
RNA	gain	-0.040425	( -0.0564, -0.0249 )	9.999e-05	0.00016665
RNA	gain+	-0.1331	( -0.163, -0.1027 )	9.999e-05	0.00016665
RNA	loss	2.5e-05	( -0.0119, 0.0124 )	0.994501	0.994501
RNA	loss+	0.053	( 0.0149, 0.0905 )	0.0049995	0.00714214
RNA	unchange	0.0012	( -0.0031, 0.0057 )	0.591341	0.657045
Protein	gain	0.0562	( 0.0395, 0.0723 )	9.999e-05	0.00016665
Protein	gain+	0.0845	( 0.0534, 0.1182 )	9.999e-05	0.00016665
Protein	loss	0.099425	( 0.0846, 0.113 )	9.999e-05	0.00016665
Protein	loss+	0.24945	( 0.206, 0.2994 )	9.999e-05	0.00016665
Protein	unchange	0.0014	( -0.0035, 0.0057 )	0.554845	0.657045
OV
levels	conditions	CORUM_NoCORUM	CI	pValue	FDR
RNA	gain	-0.0507746	( -0.0617, -0.0383 )	9.999e-05	0.000124988
RNA	gain+	-0.110128	( -0.1469, -0.0744 )	9.999e-05	0.000124988
RNA	loss	-0.0610799	( -0.0697, -0.0539 )	9.999e-05	0.000124988
RNA	loss+	-0.0807262	( -0.1057, -0.0554 )	9.999e-05	0.000124988
RNA	unchange	0.00286276	( -0.0011, 0.0071 )	0.167283	0.18587
Protein	gain	0.0329212	( 0.0261, 0.0401 )	9.999e-05	0.000124988
Protein	gain+	0.0940346	( 0.0717, 0.1175 )	9.999e-05	0.000124988
Protein	loss	0.034526	( 0.0295, 0.0398 )	9.999e-05	0.000124988
Protein	loss+	0.0878479	( 0.0719, 0.1074 )	9.999e-05	0.000124988
Protein	unchange	-0.000562305	( -0.0035, 0.0023 )	0.69683	0.69683
ccRCC
levels	conditions	CORUM_NoCORUM	CI	pValue	FDR
RNA	gain	-0.0260358	( -0.0336, -0.0177 )	9.999e-05	0.000249975
RNA	gain+	0.0240528	( -0.0511, 0.1272 )	0.631337	0.631337
RNA	loss	-0.0167677	( -0.0242, -0.0098 )	9.999e-05	0.000249975
RNA	loss+	-0.0194626	( -0.0578, 0.0364 )	0.434657	0.543321
RNA	unchange	0.00127628	( -2e-04, 0.0028 )	0.0984902	0.1407
Protein	gain	0.0340296	( 0.0288, 0.0398 )	9.999e-05	0.000249975
Protein	gain+	0.0737323	( 0.0361, 0.1258 )	0.00189981	0.00379962
Protein	loss	0.0229076	( 0.0177, 0.0277 )	9.999e-05	0.000249975
Protein	loss+	0.0475595	( 0.0072, 0.0882 )	0.0190981	0.0318302
Protein	unchange	0.000320787	( -9e-04, 0.0015 )	0.60384	0.631337
UCEC
levels	conditions	CORUM_NoCORUM	CI	pValue	FDR
RNA	gain	-0.03	( -0.04, -0.015 )	9.999e-05	0.000249975
RNA	gain+	-0.1	( -0.14, -0.055 )	0.00019998	0.0003333
RNA	loss	0.025	( 0.015, 0.04 )	0.00029997	0.000428529
RNA	loss+	-0.02	( -0.1125, 0.0475 )	0.660134	0.660134
RNA	unchange	0.005	( 0, 0.01 )	0.00349965	0.00437456
Protein	gain	0.0316	( 0.0205, 0.0421 )	9.999e-05	0.000249975
Protein	gain+	0.130875	( 0.0799, 0.2003 )	9.999e-05	0.000249975
Protein	loss	0.0758	( 0.0651, 0.0867 )	9.999e-05	0.000249975
Protein	loss+	0.137825	( 0.084, 0.2073 )	0.00019998	0.0003333
Protein	unchange	-0.0007	( -0.0024, 0.0012 )	0.420958	0.467731
HNSC
levels	conditions	CORUM_NoCORUM	CI	pValue	FDR
RNA	gain	-0.0525982	( -0.0597, -0.0448 )	9.999e-05	0.00019998
RNA	gain+	-0.106667	( -0.1413, -0.0726 )	9.999e-05	0.00019998
RNA	loss	-0.00713633	( -0.0139, -3e-04 )	0.0393961	0.0562801
RNA	loss+	-0.00821986	( -0.0685, 0.0611 )	0.818518	0.909465
RNA	unchange	0.00253495	( 7e-04, 0.0044 )	0.00719928	0.0119988
Protein	gain	0.00190935	( -0.0043, 0.008 )	0.550045	0.687556
Protein	gain+	0.105983	( 0.0739, 0.1388 )	9.999e-05	0.00019998
Protein	loss	0.0579452	( 0.0527, 0.0637 )	9.999e-05	0.00019998
Protein	loss+	0.115651	( 0.0642, 0.1642 )	9.999e-05	0.00019998
Protein	unchange	1.496e-05	( -0.0015, 0.0016 )	0.984702	0.984702
LUAD
levels	conditions	CORUM_NoCORUM	CI	pValue	FDR
RNA	gain	-0.03115	( -0.0386, -0.0239 )	9.999e-05	0.000249975
RNA	gain+	-0.033	( -0.0669, 0.0046 )	0.070493	0.117488
RNA	loss	0.0047	( -0.002, 0.011 )	0.152185	0.217407
RNA	loss+	0.0167	( -0.0567, 0.1146 )	0.70003	0.777811
RNA	unchange	0.00115	( -9e-04, 0.0032 )	0.275272	0.344091
Protein	gain	0.05985	( 0.0431, 0.0751 )	9.999e-05	0.000249975
Protein	gain+	0.3753	( 0.2836, 0.4695 )	9.999e-05	0.000249975
Protein	loss	0.089625	( 0.0753, 0.1035 )	9.999e-05	0.000249975
Protein	loss+	0.26395	( 0.08, 0.5326 )	0.030397	0.0607939
Protein	unchange	-0.0004	( -0.0048, 0.0039 )	0.861114	0.861114

## Sheet: 1F_ribosome
Table S1E split complexes into ribosome and other complexes
A: compensation scores in different SCNA groups of CPTAC samples - pan-cancer, their 95% confidential interval, p-values and FDR values for one-tail (H0: the CS are not bigger than 0) statistical tests.
levels	conditions	Group (protein complex)	CI	pValue	FDR
RNA	gain	Ribosome	( -0.0686, -0.0081 )	0.994801	1
RNA	gain	CORUM	( -0.0574, -0.0498 )	1	1
RNA	gain	NoCORUM	( -0.0303, -0.0244 )	1	1
RNA	high gain	Ribosome	( 0.0331, 0.1718 )	0.00149985	0.00239976
RNA	high gain	CORUM	( 0.1053, 0.1348 )	9.999e-05	0.000171411
RNA	high gain	NoCORUM	( 0.1622, 0.184 )	9.999e-05	0.000171411
RNA	loss	Ribosome	( -0.0882, -0.0431 )	1	1
RNA	loss	CORUM	( -0.063, -0.0568 )	1	1
RNA	loss	NoCORUM	( -0.0625, -0.0576 )	1	1
RNA	deep loss	Ribosome	( -0.2643, 0.0555 )	0.924808	1
RNA	deep loss	CORUM	( -0.0829, -0.0515 )	1	1
RNA	deep loss	NoCORUM	( -0.0837, -0.061 )	1	1
Protein	gain	Ribosome	( 0.3245, 0.3575 )	9.999e-05	0.000171411
Protein	gain	CORUM	( 0.1852, 0.1922 )	9.999e-05	0.000171411
Protein	gain	NoCORUM	( 0.1501, 0.1555 )	9.999e-05	0.000171411
Protein	high gain	Ribosome	( 0.8652, 0.9997 )	9.999e-05	0.000171411
Protein	high gain	CORUM	( 0.6258, 0.6484 )	9.999e-05	0.000171411
Protein	high gain	NoCORUM	( 0.5253, 0.544 )	9.999e-05	0.000171411
Protein	loss	Ribosome	( 0.3069, 0.335 )	9.999e-05	0.000171411
Protein	loss	CORUM	( 0.1784, 0.1837 )	9.999e-05	0.000171411
Protein	loss	NoCORUM	( 0.1346, 0.139 )	9.999e-05	0.000171411
Protein	deep loss	Ribosome	( 0.5872, 0.7307 )	9.999e-05	0.000171411
Protein	deep loss	CORUM	( 0.46, 0.4833 )	9.999e-05	0.000171411
Protein	deep loss	NoCORUM	( 0.3564, 0.374 )	9.999e-05	0.000171411
B: Comparison of the compensation scores of ribosome, other protein complex and non-CORUM genes in each condition (CPTAC)
	levels	conditions	CORUM_NoCORUM	CI	pValue	FDR
other complex VS. non-CORUM	RNA	gain	-0.0265271	( -0.0314, -0.0215 )	9.999e-05	0.00019998
	RNA	gain+	-0.0550855	( -0.0719, -0.0361 )	9.999e-05	0.00019998
	RNA	loss	-0.000239269	( -0.0038, 0.0041 )	0.893011	0.940011
	RNA	loss+	0.00443907	( -0.0148, 0.0241 )	0.645335	0.806669
	RNA	unchange	0.00075	( -7e-04, 0.0021 )	0.286071	0.476786
	Protein	gain	0.0360253	( 0.0315, 0.0402 )	9.999e-05	0.00019998
	Protein	gain+	0.102057	( 0.0881, 0.1177 )	9.999e-05	0.00019998
	Protein	loss	0.044319	( 0.0408, 0.0477 )	9.999e-05	0.00019998
	Protein	loss+	0.105833	( 0.0915, 0.1217 )	9.999e-05	0.00019998
	Protein	unchange	1.82529e-05	( -0.0011, 0.0012 )	0.975502	0.975502
ribosome VS. non-CORUM	RNA	gain	-0.0057074	( -0.0412, 0.0187 )	0.645035	0.806669
	RNA	gain+	-0.0673279	( -0.141, -0.0014 )	0.0688931	0.12526
	RNA	loss	-0.00905453	( -0.0282, 0.0164 )	0.433757	0.667318
	RNA	loss+	-0.058525	( -0.1918, 0.1206 )	0.60114	0.806669
	RNA	unchange	-0.00100257	( -0.0075, 0.0066 )	0.831017	0.940011
	Protein	gain	0.187453	( 0.1726, 0.206 )	9.999e-05	0.00019998
	Protein	gain+	0.405405	( 0.3292, 0.4652 )	9.999e-05	0.00019998
	Protein	loss	0.183312	( 0.1696, 0.1981 )	9.999e-05	0.00019998
	Protein	loss+	0.309336	( 0.2228, 0.3691 )	9.999e-05	0.00019998
	Protein	unchange	-0.000460784	( -0.0057, 0.0049 )	0.889111	0.940011

## Sheet: 1G_label_free
Table S1F Analysis of label-free TCGA data (Zhang et al., Nature, 2014)
A: compensation scores in different SCNA groups of TCGA/CPTAC samples (COAD), their 95% confidential interval, p-values and FDR values for one-tail (H0: the CS are not bigger than 0) statistical tests.
levels	conditions	CORUM	CI	pValue	FDR
RNA	gain	CORUM	( 0.1632, 0.1969 )	9.999e-05	9.999e-05
RNA	gain	NoCORUM	( 0.1711, 0.2048 )	9.999e-05	9.999e-05
RNA	high gain	CORUM	( 0.5155, 0.5544 )	9.999e-05	9.999e-05
RNA	high gain	NoCORUM	( 0.5651, 0.6077 )	9.999e-05	9.999e-05
RNA	loss	CORUM	( 0.1052, 0.1285 )	9.999e-05	9.999e-05
RNA	loss	NoCORUM	( 0.1027, 0.1363 )	9.999e-05	9.999e-05
RNA	deep loss	CORUM	( 0.1031, 0.1432 )	9.999e-05	9.999e-05
RNA	deep loss	NoCORUM	( 0.1064, 0.155 )	9.999e-05	9.999e-05
Protein	gain	CORUM	( 0.3304, 0.3626 )	9.999e-05	9.999e-05
Protein	gain	NoCORUM	( 0.2609, 0.3002 )	9.999e-05	9.999e-05
Protein	high gain	CORUM	( 0.8603, 0.9042 )	9.999e-05	9.999e-05
Protein	high gain	NoCORUM	( 0.8261, 0.8732 )	9.999e-05	9.999e-05
Protein	loss	CORUM	( 0.3421, 0.3666 )	9.999e-05	9.999e-05
Protein	loss	NoCORUM	( 0.3011, 0.3319 )	9.999e-05	9.999e-05
Protein	deep loss	CORUM	( 0.5806, 0.6294 )	9.999e-05	9.999e-05
Protein	deep loss	NoCORUM	( 0.4539, 0.5223 )	9.999e-05	9.999e-05
B: Comparison of the compensation scores of protein complex and non-CORUM genes in each condition (TCGA/CPTAC)
levels	conditions	CORUM_NoCORUM	CI	pValue	FDR
RNA	gain	-0.00718369	( -0.0207, 0.0063 )	0.30397	0.379962
RNA	gain+	-0.0288502	( -0.0468, -0.0119 )	0.00119988	0.0029997
RNA	loss	-0.012696	( -0.0225, -0.001 )	0.0223978	0.0373296
RNA	loss+	-0.0300384	( -0.0477, -0.0162 )	0.00059994	0.0019998
RNA	unchange	-0.000359438	( -0.0027, 0.0023 )	0.778722	0.778722
Protein	gain	0.0376352	( 0.0231, 0.0501 )	9.999e-05	0.00049995
Protein	gain+	0.0670862	( 0.0507, 0.0813 )	9.999e-05	0.00049995
Protein	loss	-0.00292981	( -0.0113, 0.0081 )	0.49565	0.550723
Protein	loss+	0.005	( -0.0045, 0.0138 )	0.271973	0.379962
Protein	unchange	0.002	( 0.001, 0.0039 )	0.0049995	0.009999

## Sheet: 1H_Genome doubling
Table S1G: analysis of samples without genome doubling
A: compensation scores in different SCNA groups of TCGA/CPTAC samples (COAD) with genome doubling, their 95% confidential interval, p-values and FDR values for one-tail (H0: the CS are not bigger than 0) statistical tests.
levels	conditions	CORUM	CI	pValue	FDR
RNA	gain	CORUM	( 0.142, 0.1868 )	9.999e-05	9.999e-05
RNA	gain	NoCORUM	( 0.1753, 0.2119 )	9.999e-05	9.999e-05
RNA	high gain	CORUM	( 0.5042, 0.5381 )	9.999e-05	9.999e-05
RNA	high gain	NoCORUM	( 0.5361, 0.5662 )	9.999e-05	9.999e-05
RNA	loss	CORUM	( 0.0226, 0.0657 )	9.999e-05	9.999e-05
RNA	loss	NoCORUM	( 0.0587, 0.0905 )	9.999e-05	9.999e-05
RNA	deep loss	CORUM	( 0.1041, 0.1381 )	9.999e-05	9.999e-05
RNA	deep loss	NoCORUM	( 0.1492, 0.1783 )	9.999e-05	9.999e-05
Protein	gain	CORUM	( 0.3522, 0.3999 )	9.999e-05	9.999e-05
Protein	gain	NoCORUM	( 0.2886, 0.3234 )	9.999e-05	9.999e-05
Protein	high gain	CORUM	( 0.796, 0.828 )	9.999e-05	9.999e-05
Protein	high gain	NoCORUM	( 0.7609, 0.7895 )	9.999e-05	9.999e-05
Protein	loss	CORUM	( 0.392, 0.4407 )	9.999e-05	9.999e-05
Protein	loss	NoCORUM	( 0.3893, 0.4153 )	9.999e-05	9.999e-05
Protein	deep loss	CORUM	( 0.6722, 0.6936 )	9.999e-05	9.999e-05
Protein	deep loss	NoCORUM	( 0.6693, 0.6843 )	9.999e-05	9.999e-05
B: Comparison of the compensation scores of protein complex and non-CORUM genes in each condition of TCGA/CPTAC samples (COAD) with genome doubling
levels	conditions	CORUM_NoCORUM	CI	pValue	FDR
RNA	gain	-0.0285753	( -0.0588, -6e-04 )	0.0552945	0.0812776
RNA	gain+	-0.0307774	( -0.0531, -0.0072 )	0.00809919	0.020248
RNA	loss	-0.0313332	( -0.057, -0.0028 )	0.0246975	0.0493951
RNA	loss+	-0.0417225	( -0.0652, -0.019 )	0.00049995	0.0019998
RNA	unchange	0	( -0.0023, 0.0027 )	0.955504	0.955504
Protein	gain	0.0733792	( 0.0407, 0.1017 )	9.999e-05	0.0009999
Protein	gain+	0.0396472	( 0.0172, 0.0601 )	0.00059994	0.0019998
Protein	loss	0.0133481	( -0.0162, 0.0417 )	0.356964	0.446205
Protein	loss+	0.00483241	( -0.0058, 0.0192 )	0.447255	0.49695
Protein	unchange	0.001	( 0, 0.0025 )	0.0568943	0.0812776
C: compensation scores in different SCNA groups of TCGA/CPTAC samples (BRCA) with genome doubling, their 95% confidential interval, p-values and FDR values for one-tail (H0: the CS are not bigger than 0) statistical tests.
levels	conditions	CORUM	CI	pValue	FDR
RNA	gain	CORUM	( 0.0667, 0.0975 )	9.999e-05	0.000114274
RNA	gain	NoCORUM	( 0.1196, 0.1466 )	9.999e-05	0.000114274
RNA	high gain	CORUM	( 0.3133, 0.3723 )	9.999e-05	0.000114274
RNA	high gain	NoCORUM	( 0.4124, 0.4683 )	9.999e-05	0.000114274
RNA	loss	CORUM	( -0.0074, 0.0149 )	0.263274	0.263274
RNA	loss	NoCORUM	( 8e-04, 0.0194 )	0.0163984	0.0174916
RNA	deep loss	CORUM	( 0.045, 0.096 )	9.999e-05	0.000114274
RNA	deep loss	NoCORUM	( 0.0461, 0.0914 )	9.999e-05	0.000114274
Protein	gain	CORUM	( 0.1428, 0.1978 )	9.999e-05	0.000114274
Protein	gain	NoCORUM	( 0.096, 0.1526 )	9.999e-05	0.000114274
Protein	high gain	CORUM	( 0.5563, 0.6572 )	9.999e-05	0.000114274
Protein	high gain	NoCORUM	( 0.4249, 0.5201 )	9.999e-05	0.000114274
Protein	loss	CORUM	( 0.114, 0.1573 )	9.999e-05	0.000114274
Protein	loss	NoCORUM	( 0.0492, 0.0907 )	9.999e-05	0.000114274
Protein	deep loss	CORUM	( 0.2929, 0.3729 )	9.999e-05	0.000114274
Protein	deep loss	NoCORUM	( 0.1885, 0.2662 )	9.999e-05	0.000114274
D: Comparison of the compensation scores of protein complex and non-CORUM genes in each condition of TCGA/CPTAC samples (BRCA) with genome doubling
levels	conditions	CORUM_NoCORUM	CI	pValue	FDR
RNA	gain	-0.0508715	( -0.0721, -0.0307 )	9.999e-05	0.0003333
RNA	gain+	-0.0925965	( -0.1354, -0.0546 )	9.999e-05	0.0003333
RNA	loss	-0.005854	( -0.0213, 0.0082 )	0.420658	0.60094
RNA	loss+	0.00461475	( -0.0316, 0.0371 )	0.794021	0.794021
RNA	unchange	0.00042575	( -0.0021, 0.0032 )	0.734027	0.794021
Protein	gain	0.0431024	( 0.0052, 0.0846 )	0.0347965	0.0579942
Protein	gain+	0.127469	( 0.0648, 0.1989 )	0.00019998	0.00039996
Protein	loss	0.0679612	( 0.0359, 0.0972 )	9.999e-05	0.0003333
Protein	loss+	0.110406	( 0.0521, 0.1641 )	0.00019998	0.00039996
Protein	unchange	-0.000224342	( -0.0033, 0.0038 )	0.789421	0.794021
E: compensation scores in different SCNA groups of TCGA/CPTAC samples (OV) with genome doubling, their 95% confidential interval, p-values and FDR values for one-tail (H0: the CS are not bigger than 0) statistical tests.
levels	conditions	CORUM	CI	pValue	FDR
RNA	gain	CORUM	( 0.1012, 0.1178 )	9.999e-05	9.999e-05
RNA	gain	NoCORUM	( 0.1231, 0.135 )	9.999e-05	9.999e-05
RNA	high gain	CORUM	( 0.2163, 0.2605 )	9.999e-05	9.999e-05
RNA	high gain	NoCORUM	( 0.266, 0.2945 )	9.999e-05	9.999e-05
RNA	loss	CORUM	( 0.1526, 0.1679 )	9.999e-05	9.999e-05
RNA	loss	NoCORUM	( 0.1896, 0.2021 )	9.999e-05	9.999e-05
RNA	deep loss	CORUM	( 0.307, 0.32 )	9.999e-05	9.999e-05
RNA	deep loss	NoCORUM	( 0.3358, 0.3477 )	9.999e-05	9.999e-05
Protein	gain	CORUM	( 0.297, 0.3124 )	9.999e-05	9.999e-05
Protein	gain	NoCORUM	( 0.2692, 0.2807 )	9.999e-05	9.999e-05
Protein	high gain	CORUM	( 0.6143, 0.6438 )	9.999e-05	9.999e-05
Protein	high gain	NoCORUM	( 0.5461, 0.5737 )	9.999e-05	9.999e-05
Protein	loss	CORUM	( 0.3701, 0.3826 )	9.999e-05	9.999e-05
Protein	loss	NoCORUM	( 0.3362, 0.3475 )	9.999e-05	9.999e-05
Protein	deep loss	CORUM	( 0.6026, 0.6148 )	9.999e-05	9.999e-05
Protein	deep loss	NoCORUM	( 0.5286, 0.5393 )	9.999e-05	9.999e-05
F: Comparison of the compensation scores of protein complex and non-CORUM genes in each condition of TCGA/CPTAC samples (OV) with genome doubling
levels	conditions	CORUM_NoCORUM	CI	pValue	FDR
RNA	gain	-0.0185886	( -0.0297, -0.0086 )	0.00059994	0.000857057
RNA	gain+	-0.0434919	( -0.0687, -0.0163 )	0.00119988	0.00149985
RNA	loss	-0.0352956	( -0.0455, -0.0257 )	9.999e-05	0.00016665
RNA	loss+	-0.0280835	( -0.0367, -0.0194 )	9.999e-05	0.00016665
RNA	unchange	-0.00195679	( -0.0053, 0.0015 )	0.260274	0.260274
Protein	gain	0.0295465	( 0.02, 0.0394 )	9.999e-05	0.00016665
Protein	gain+	0.0705765	( 0.0482, 0.0889 )	9.999e-05	0.00016665
Protein	loss	0.03425	( 0.0262, 0.043 )	9.999e-05	0.00016665
Protein	loss+	0.074937	( 0.0668, 0.0829 )	9.999e-05	0.00016665
Protein	unchange	-0.00189	( -0.0048, 9e-04 )	0.19698	0.218867

## Sheet: 1I_compensation score_CCLE
Table S1F: Compensation scores in different groups of CCLE pan-cancer, their 95% confidential interval, p-values and FDR values for one-tail (H0: the CS are not higher than 0) test.
levels	conditions	CORUM	CI	pValue	FDR
RNA	gain	CORUM	( -0.1812, -0.1719 )	1	1
RNA	gain	NoCORUM	( -0.1727, -0.1648 )	1	1
RNA	high gain	CORUM	( -0.4221, -0.3737 )	1	1
RNA	high gain	NoCORUM	( -0.393, -0.3539 )	1	1
RNA	loss	CORUM	( -0.2839, -0.2725 )	1	1
RNA	loss	NoCORUM	( -0.2321, -0.2229 )	1	1
RNA	deep loss	CORUM	( 0.2495, 0.5317 )	9.999e-05	0.00017776
RNA	deep loss	NoCORUM	( 0.3781, 0.5378 )	9.999e-05	0.00017776
Protein	gain	CORUM	( 0.1316, 0.1408 )	9.999e-05	0.00017776
Protein	gain	NoCORUM	( 0.0384, 0.0472 )	9.999e-05	0.00017776
Protein	high gain	CORUM	( 0.4525, 0.4928 )	9.999e-05	0.00017776
Protein	high gain	NoCORUM	( 0.1439, 0.1922 )	9.999e-05	0.00017776
Protein	loss	CORUM	( 0.0669, 0.0777 )	9.999e-05	0.00017776
Protein	loss	NoCORUM	( -0.013, -0.0037 )	0.9998	1
Protein	deep loss	CORUM	( 0.4879, 0.6757 )	9.999e-05	0.00017776
Protein	deep loss	NoCORUM	( 0.4338, 0.5734 )	9.999e-05	0.00017776

## Sheet: 1J_CORUM vs Non-CORUM_CCLE
Table S1G: Comparison of the compensation scores of CORUM and non-CORUM genes in each SCNA group (CCLE)
levels	conditions	CORUM_NoCORUM	CI	pValue	FDR
RNA	gain	-0.00779679	( -0.014, -0.0018 )	0.010199	0.0169983
RNA	gain+	-0.0236768	( -0.056, 0.0066 )	0.147985	0.211407
RNA	loss	-0.0505102	( -0.0581, -0.0435 )	9.999e-05	0.00019998
RNA	loss+	-0.0707691	( -0.2304, 0.1031 )	0.339066	0.345765
RNA	unchange	0.00266175	( 0.0017, 0.0038 )	9.999e-05	0.00019998
Protein	gain	0.0935412	( 0.0873, 0.0998 )	9.999e-05	0.00019998
Protein	gain+	0.304572	( 0.2728, 0.3349 )	9.999e-05	0.00019998
Protein	loss	0.0809768	( 0.0736, 0.088 )	9.999e-05	0.00019998
Protein	loss+	0.0537598	( -0.0483, 0.1792 )	0.289171	0.345765
Protein	unchange	-0.000435764	( -0.0014, 7e-04 )	0.345765	0.345765

[truncated: 4 more sheets: 1K_hCEC_arm, 1L_compensation score_hCEC, 1M_CORUM vs Non-CORUM_hCEC, 1N_qPCR]
