# Supplementary material for: Proteogenomic analysis of cancer aneuploidy and normal tissues reveals divergent modes of gene regulation across cellular pathways
Source: eLife. 2022 Sep 21;11:e75227. doi: 10.7554/eLife.75227 (PMC9491860; doi:10.7554/eLife.75227)
Supplement: Supplementary file 2. [file elife-75227-supp2.xlsx]

## Sheet: S2A.Pan-Cancer.corr.table
S2A. Spearman's DNA-RNA Corr and RNA-Pro Corr for each gene in Pan-Cancer
gene	DNA-RNA Corr	RNA-Pro Corr	CORUM complex
A1BG	0.0884557	0.0902539	FALSE
A1CF	0.174765	0.589265	FALSE
A2M	-0.0754813	0.143396	TRUE
A2ML1	0.100102	0.79675	FALSE
A4GALT	0.423904	0.538853	FALSE
AAAS	0.546425	0.194209	FALSE
AACS	0.431065	0.650879	FALSE
AADAC	0.0219126	0.452699	FALSE
AADAT	0.0940016	0.298416	FALSE
AAED1	0.38353	0.183922	FALSE
AAGAB	0.54218	0.583259	FALSE
AAK1	0.220312	0.522049	FALSE
AAMDC	0.376481	0.503095	FALSE
AAMP	0.531083	0.517801	FALSE
AAR2	0.620991	0.414444	FALSE
AARS	0.499395	0.750482	FALSE
AARS2	0.582838	0.513685	FALSE
AARSD1	0.504835	0.564335	FALSE
AASDH	0.60055	0.0200652	FALSE
AASDHPPT	0.54911	0.597665	FALSE
AASS	0.0634855	0.651584	FALSE
AATF	0.53331	0.270463	FALSE
AATK	0.242221	0.796364	FALSE
ABAT	0.310641	0.719676	FALSE
ABCA1	0.170736	0.323337	FALSE
ABCA12	0.188419	0.360001	FALSE
ABCA13	0.180325	-0.00512202	FALSE
ABCA2	0.173304	0.164302	FALSE
ABCA3	0.152705	0.500664	FALSE
ABCA5	0.318896	-0.168706	FALSE
ABCA6	0.0204887	0.288236	FALSE
ABCA7	0.441843	-0.123146	FALSE
ABCA8	0.00211442	0.466724	FALSE
ABCB1	-0.0624402	0.455246	TRUE
ABCB10	0.575805	0.368995	FALSE
ABCB5	0.092849	0.1311	FALSE
ABCB6	0.161964	0.484663	FALSE
ABCB7	0.320376	0.377091	FALSE
ABCB8	0.395128	0.325048	FALSE
ABCB9	0.566244	0.345455	FALSE
ABCC1	0.309624	0.380251	FALSE
ABCC10	0.414132	0.0975343	FALSE
ABCC11	0.253471	0.494981	FALSE
ABCC2	0.22346	0.296955	FALSE
ABCC3	0.176082	0.531628	FALSE
ABCC4	0.257123	0.527993	FALSE
ABCC5	0.418493	0.286341	FALSE
ABCC6	0.407946	0.634674	FALSE
ABCC8	0.023792	0.0860204	FALSE
ABCC9	-0.0592384	0.111192	TRUE
ABCD1	0.221636	0.514427	FALSE
ABCD3	0.416475	0.489977	FALSE
ABCD4	0.58942	0.241943	FALSE
ABCE1	0.439899	0.55461	FALSE
ABCF1	0.575291	0.569914	FALSE
ABCF2	0.595582	0.671243	FALSE
ABCF3	0.702365	0.501538	FALSE
ABCG1	0.0660492	0.642405	FALSE
ABCG2	0.225355	0.476095	FALSE
ABCG4	0.192475	-0.3	FALSE
ABHD10	0.486132	0.426193	FALSE
ABHD11	0.402633	0.581567	FALSE
ABHD12	0.544309	0.518926	FALSE
ABHD13	0.642032	0.193408	FALSE
ABHD14A	0.274779	0.10624	FALSE
ABHD14A.ACY1	0.0723588	0.19097	FALSE
ABHD14B	0.293425	0.5478	FALSE
ABHD15	0.2926	0.192499	FALSE
ABHD16A	0.525682	0.531561	FALSE
ABHD17A	0.398511	0.108557	FALSE
ABHD17B	0.605347	0.22987	FALSE
ABHD17C	0.409305	0.402168	FALSE
ABHD18	0.701037	0.106029	FALSE
ABHD2	0.303693	0.195567	FALSE
ABHD3	0.398349	0.361516	FALSE
ABHD4	0.431585	0.529013	FALSE
ABHD5	0.266237	0.309928	FALSE
ABHD6	0.192274	0.576287	FALSE
ABI1	0.571042	0.380127	TRUE
ABI2	0.493295	0.460765	FALSE
ABI3	-0.0516878	0.646153	TRUE
ABI3BP	0.056786	0.649762	FALSE
ABL1	0.461303	0.348814	TRUE
ABL2	0.364453	0.313086	FALSE
ABLIM1	0.359213	0.575439	FALSE
ABLIM2	0.231017	0.532837	FALSE
ABLIM3	0.301678	0.692491	FALSE
ABO	0.181587	0.459728	FALSE
ABR	0.26316	0.44574	FALSE
ABRACL	0.411913	0.573254	FALSE
ABRAXAS1	0.373304	0.456748	FALSE
ABRAXAS2	0.603313	0.525509	TRUE
ABT1	0.604877	0.306465	FALSE
ABTB1	0.266706	0.104887	FALSE
ABTB2	0.274549	0.341584	FALSE
ACAA1	0.400502	0.476877	FALSE
ACAA2	0.394826	0.678987	FALSE
ACACA	0.372877	0.616273	FALSE
ACACB	0.176498	0.19466	FALSE
ACAD10	0.459799	0.419875	FALSE
ACAD11	0.33694	0.29875	FALSE
ACAD8	0.573454	0.567204	TRUE
ACAD9	0.669001	0.444883	FALSE
ACADL	0.0246521	0.483048	FALSE
ACADM	0.418938	0.560255	FALSE
ACADS	0.236028	0.53672	FALSE
ACADSB	0.273089	0.657585	FALSE
ACADVL	0.504767	0.544617	FALSE
ACAN	0.0429359	0.475026	FALSE
ACAP1	0.141142	0.63773	TRUE
ACAP2	0.473844	0.546068	FALSE
ACAP3	0.372177	0.237718	FALSE
ACAT1	0.421543	0.563369	FALSE
ACAT2	0.358105	0.624107	FALSE
ACBD3	0.54003	0.479804	FALSE
ACBD4	0.259201	0.344648	FALSE
ACBD5	0.52358	0.525046	FALSE
ACBD6	0.704476	0.465218	FALSE
ACBD7	0.103407	0.587238	FALSE
ACCS	0.111184	0.0140909	FALSE
ACD	0.444336	0.0367104	TRUE
ACE	0.0573038	0.575812	FALSE
ACE2	0.208824	0.721622	FALSE
ACHE	0.0818575	0.282391	FALSE
ACIN1	0.503808	0.249361	TRUE
ACKR1	-0.187762	0.616627	FALSE
ACKR3	0.229773	0.896782	FALSE
ACLY	0.436388	0.605852	FALSE
ACMSD	0.167767	0.469586	FALSE
ACO1	0.4262	0.635019	FALSE
ACO2	0.511934	0.467821	FALSE
ACOT1	0.269601	0.498039	FALSE
ACOT11	0.2105	0.656274	FALSE
ACOT13	0.36307	0.402716	FALSE
ACOT2	0.450398	0.377622	FALSE
ACOT4	0.263548	0.286838	FALSE
ACOT7	0.258201	0.644642	FALSE
ACOT8	0.507516	0.474782	FALSE
ACOT9	0.409885	0.469051	FALSE
ACOX1	0.435598	0.353826	FALSE
ACOX2	0.222817	0.413909	FALSE
ACOX3	0.514227	0.576125	FALSE
ACOXL	-0.0291488	-0.325018	FALSE
ACP1	0.528858	0.332137	FALSE
ACP2	0.339298	0.520251	FALSE
ACP5	0.0347321	0.57135	FALSE
ACP6	0.321818	0.578399	FALSE
ACP7	-0.0146616	0.80589	FALSE
ACPP	0.188751	0.70451	FALSE
ACSF2	0.142548	0.725577	FALSE
ACSF3	0.533629	0.497269	FALSE
ACSL1	0.244934	0.711415	FALSE
ACSL3	0.327865	0.610316	FALSE
ACSL4	0.197409	0.748415	FALSE
ACSL5	0.300343	0.800959	FALSE
ACSL6	0.225579	0.514107	FALSE
ACSM1	0.335846	0.392576	FALSE
ACSM2A	0.163599	0.351867	FALSE
ACSM2B	0.101785	0.441905	FALSE
ACSM3	0.225436	0.584735	FALSE
ACSM4	-0.19576	0.0391129	FALSE
ACSM5	0.0743853	0.68672	FALSE
ACSS1	0.254554	0.702805	FALSE
ACSS2	0.319594	0.706567	FALSE
ACSS3	0.10373	0.746169	FALSE
ACTA1	0.166708	0.212571	FALSE
ACTA2	0.0116241	0.534673	TRUE
ACTB	0.221002	0.259724	TRUE
ACTBL2	0.165551	0.133921	FALSE
ACTC1	0.182679	0.732592	FALSE
ACTG1	0.445463	0.0808723	TRUE
ACTG2	0.0391783	0.659262	TRUE
ACTL6A	0.643815	0.374638	TRUE
ACTL8	0.103229	0.479087	FALSE
ACTN1	0.283878	0.432695	TRUE
ACTN2	0.087492	0.304763	FALSE
ACTN3	0.183795	0.222142	FALSE
ACTN4	0.369982	0.343817	TRUE
ACTR10	0.563148	0.143676	FALSE
ACTR1A	0.587369	0.478503	FALSE
ACTR1B	0.431587	0.413872	FALSE
ACTR2	0.462263	0.278799	TRUE
ACTR3	0.440096	0.31487	TRUE
ACTR3B	0.588454	0.21359	FALSE
ACTR3C	0.411869	0.160268	FALSE
ACTR5	0.520894	0.328992	TRUE
ACTR6	0.38361	0.143472	TRUE
ACTR8	0.452719	0.303438	TRUE
ACTRT1	-0.0234094	-0.000362466	FALSE
ACVR1	0.306651	0.473006	FALSE
ACVR1B	0.535325	0.277692	FALSE
ACVR1C	-0.0893314	0	FALSE
ACVR2A	0.623326	0.391303	FALSE
ACVRL1	-0.029385	0.10679	FALSE
ACY1	0.235067	0.579295	FALSE
ACY3	0.176117	0.730769	FALSE
ACYP1	0.39108	0.523044	FALSE
ACYP2	0.232522	0.416698	FALSE
ADA	0.262316	0.732237	TRUE
ADA2	-0.00854412	0.581785	FALSE
ADAL	0.428029	0.460598	FALSE
ADAM10	0.510331	0.445845	FALSE
ADAM12	-0.109009	0.47431	TRUE
ADAM15	0.202757	0.442696	TRUE
ADAM17	0.51114	0.338882	FALSE
ADAM22	0.259104	0.251522	TRUE
ADAM28	0.246881	0.607243	FALSE
ADAM8	0.140728	0.55377	TRUE
ADAM9	0.444252	0.588984	TRUE
ADAMDEC1	-0.0318612	0.395183	FALSE
ADAMTS1	0.201858	0.416108	FALSE
ADAMTS12	-0.0764636	0.608935	FALSE
ADAMTS13	0.305329	0.16303	FALSE
ADAMTS14	-0.00171246	0.720168	FALSE
ADAMTS15	-0.05493	0.486884	FALSE
ADAMTS16	0.034308	0.387199	FALSE
ADAMTS18	0.279124	0.0426244	FALSE
ADAMTS2	0.0255696	0.554954	FALSE
ADAMTS4	-0.0282946	0.483058	FALSE
ADAMTS5	0.0270061	0.296697	FALSE
ADAMTS7	-0.0759254	0.440512	FALSE
ADAMTS8	0.188151	0.639644	FALSE
ADAMTS9	0.354224	0.534587	FALSE
ADAMTSL1	0.1082	0.539274	FALSE
ADAMTSL2	0.042466	0.506486	FALSE
ADAMTSL3	0.106145	0.378702	FALSE
ADAMTSL4	-0.0334495	0.448643	FALSE
ADAMTSL5	0.146547	0.289693	FALSE
ADAP1	0.288965	0.498758	FALSE
ADAP2	0.0139641	0.574054	FALSE
ADAR	0.527069	0.554836	TRUE
ADARB1	0.251295	0.578054	FALSE
ADARB2	-0.0247319	-0.160788	FALSE
ADAT1	0.560874	0.382692	FALSE
ADAT2	0.353256	0.399756	FALSE
ADAT3	0.367092	0.205315	FALSE
ADCK1	0.420832	0.256739	FALSE
ADCK2	0.622855	0.153021	FALSE
ADCK5	0.598185	0.345041	FALSE
ADCY3	0.207743	0.225818	FALSE
ADCY4	-0.00427173	-0.178571	FALSE
ADCY5	0.135399	0.0852642	FALSE
ADCY6	0.277067	0.269887	FALSE
ADCY7	0.356148	0.231278	FALSE
ADCY8	0.071763	0.226611	FALSE
ADCY9	0.406562	0.422965	FALSE
ADD1	0.50873	0.241238	FALSE
ADD2	0.204687	0.415263	TRUE
ADD3	0.204374	0.563548	FALSE
ADGB	0.0100369	0.499826	FALSE
ADGRA2	-0.0927873	0.480441	FALSE
ADGRA3	0.422889	0.591412	FALSE
ADGRE2	0.056799	0.679477	FALSE
ADGRE3	-0.107409	0.577849	FALSE
ADGRE5	0.26986	0.68098	FALSE
ADGRF1	-0.0224783	0.49646	FALSE
ADGRF4	-0.114995	0.119175	FALSE
ADGRF5	0.195131	0.721069	FALSE
ADGRG1	0.348103	0.615134	TRUE
ADGRG2	0.104414	0.488377	FALSE
ADGRG3	0.0747972	0.717826	FALSE
ADGRG5	0.00782267	0.46169	FALSE
ADGRG6	0.277872	0.584435	FALSE
ADGRL1	0.190517	0.0197009	FALSE
ADGRL2	0.172648	0.736477	FALSE
ADGRL3	0.176778	0.545007	TRUE
ADGRL4	0.0251789	0.551584	FALSE
ADGRV1	0.172844	0.0157562	FALSE
ADH1A	0.119275	0.120366	FALSE
ADH1B	0.0328294	0.685117	FALSE
ADH1C	0.16368	0.571091	FALSE
ADH4	0.137533	0.223567	FALSE
ADH5	0.494467	0.572952	FALSE
ADH6	0.123253	0.527031	FALSE
ADH7	0.113502	0.746177	FALSE
ADHFE1	0.14022	0.438655	FALSE
ADI1	0.363048	0.43143	FALSE
ADIPOQ	-0.0305451	0.233894	TRUE
ADIPOR1	0.499537	0.318097	FALSE
ADIPOR2	0.434484	0.4	FALSE
ADIRF	0.11356	0.741963	FALSE
ADK	0.396356	0.618905	FALSE
ADM	0.281649	0.45882	FALSE
ADM2	0.11647	-0.6	FALSE
ADNP	0.541338	0.574101	FALSE
ADNP2	0.493429	0.270526	FALSE
ADO	0.634163	0.449833	FALSE
ADPGK	0.565139	0.48187	FALSE
ADPRH	0.188091	0.662376	FALSE
ADPRHL1	0.360346	0.536136	FALSE
ADPRHL2	0.529603	0.397977	FALSE
ADPRM	0.407162	0.4218	FALSE
ADRA2A	0.0829919	0.419702	TRUE
ADRM1	0.506186	0.264115	FALSE
ADSL	0.493125	0.591379	FALSE
ADSS	0.548471	0.57953	FALSE
ADSSL1	0.45314	0.713811	FALSE
ADTRP	-0.202674	0.35536	FALSE
AEBP1	0.0359542	0.678873	FALSE
AEBP2	0.621252	0.0999236	TRUE
AES	0.385913	0.371265	FALSE
AFAP1	0.2558	0.537253	FALSE
AFAP1L1	0.13825	0.629926	FALSE
AFAP1L2	0.235406	0.749829	FALSE
AFDN	0.475629	0.364127	FALSE
AFF1	0.435452	0.280749	TRUE
AFF2	-0.0911141	0.0558754	FALSE
AFF3	-0.069156	0.30584	FALSE
AFF4	0.480429	0.120005	TRUE
AFG1L	0.29725	0.509086	FALSE
AFG3L2	0.656706	0.566381	TRUE
AFM	0.0729316	0.0607397	FALSE
AFMID	0.355422	0.314433	FALSE
AFTPH	0.38267	0.527566	FALSE
AGA	0.355801	0.513168	FALSE
AGAP1	0.327369	0.408677	FALSE
AGAP2	0.0460184	0.325876	FALSE
AGAP3	0.529396	0.428198	FALSE
AGBL1	0.120092	0.386429	FALSE
AGBL3	0.20523	-0.111735	FALSE
AGER	0.0134456	0.440748	FALSE
AGFG1	0.516001	0.551867	FALSE
AGFG2	0.303927	0.649376	FALSE
AGGF1	0.643452	0.231769	FALSE
AGK	0.544411	0.404034	FALSE
AGL	0.401081	0.537058	FALSE
AGMAT	0.297143	0.57692	FALSE
AGO1	0.382847	0.203037	FALSE
AGO2	0.533016	0.38668	TRUE
AGO3	0.479955	0.23029	FALSE
AGO4	0.367581	0.123014	TRUE
AGPAT1	0.448155	0.280059	FALSE
AGPAT2	0.416867	0.604626	FALSE
AGPAT3	0.468768	0.46104	FALSE
AGPAT4	0.379275	0.518815	FALSE
AGPAT5	0.575377	0.511936	FALSE
AGPS	0.268594	0.467075	TRUE
AGR2	0.0855441	0.733716	FALSE
AGR3	0.0787059	0.669865	FALSE
AGRN	0.204441	0.274117	FALSE
AGT	0.125411	0.0675983	TRUE
AGTPBP1	0.360838	0.4673	FALSE
AGTR1	-0.0976526	0.657343	FALSE
AGTRAP	0.436339	0.418464	FALSE
AGXT	0.115566	0.0823157	FALSE
AGXT2	0.174054	0.530136	FALSE
AHCTF1	0.63649	0.359331	FALSE
AHCY	0.484667	0.463089	FALSE
AHCYL1	0.504667	0.435267	FALSE
AHCYL2	0.327125	0.538564	FALSE
AHDC1	0.345426	0.438227	FALSE
AHNAK	0.201672	0.582211	TRUE
AHNAK2	0.17805	0.73147	FALSE
AHR	0.25132	0.677807	TRUE
AHSA1	0.541209	0.762192	FALSE
AHSG	0.214989	-0.128066	FALSE
AHSP	0.0652231	0.174585	FALSE
AIDA	0.460166	0.400421	FALSE
AIF1	0.00372565	0.702142	FALSE
AIF1L	0.161166	0.762634	FALSE
AIFM1	0.28743	0.551113	TRUE
AIFM2	0.324797	0.486195	FALSE
AIFM3	0.350939	0.0641837	FALSE
AIG1	0.387871	0.493706	FALSE
AIM1	0.360199	0.779422	FALSE
AIM2	-0.27244	0.731424	FALSE
AIMP1	0.502455	0.304349	TRUE
AIMP2	0.437634	0.249706	TRUE
AIP	0.483899	0.509513	FALSE
AJAP1	0.182306	0.842081	FALSE
AJUBA	0.451943	0.608989	TRUE
AK1	0.367123	0.651524	FALSE
AK2	0.49175	0.36376	FALSE
AK3	0.610773	0.582516	FALSE
AK4	0.243719	0.781446	FALSE
AK5	0.0577229	0.593894	FALSE
AK6	0.349528	0.467267	FALSE
AK7	0.252165	0.486585	FALSE
AK8	0.314515	0.615431	FALSE
AK9	0.396763	-0.414621	FALSE
AKAP1	0.458584	0.717916	TRUE
AKAP10	0.704516	0.405668	FALSE
AKAP11	0.584402	0.237414	FALSE
AKAP12	0.160782	0.707421	FALSE
AKAP13	0.348002	0.524694	TRUE
AKAP17A	0.519505	0.369807	FALSE
AKAP2	0.2366	0.261679	FALSE
AKAP4	-0.196429	-0.8	FALSE
AKAP5	0.209277	0.383446	TRUE
AKAP6	0.352878	-0.0591603	FALSE
AKAP7	0.308976	0.38424	FALSE
AKAP8	0.488366	0.381287	FALSE
AKAP8L	0.452668	0.433645	TRUE
AKAP9	0.519836	0.471361	TRUE
AKIP1	0.502809	0.114664	FALSE
AKIRIN2	0.233542	0.523605	FALSE
AKNA	0.186004	0.336401	FALSE
AKR1A1	0.333796	0.438491	FALSE
AKR1B1	0.136716	0.668688	FALSE
AKR1B10	0.163827	0.575751	FALSE
AKR1B15	0.167488	0.0674488	FALSE
AKR1C1	0.235286	0.645475	FALSE
AKR1C2	0.16247	0.682185	FALSE
AKR1C3	0.207315	0.819928	FALSE
AKR1C4	0.0824234	0.249925	FALSE
AKR1D1	0.0286906	-0.276461	FALSE
AKR1E2	0.226426	0.0529783	FALSE
AKR7A2	0.50983	0.570957	FALSE
AKR7A3	0.205751	0.635538	FALSE
AKT1	0.6297	0.474011	TRUE
AKT1S1	0.313625	0.220845	FALSE
AKT2	0.422813	0.357236	TRUE
AKT3	0.0309332	0.6775	FALSE
AKTIP	0.527277	0.42515	TRUE
ALAD	0.53639	0.441313	FALSE
ALAS1	0.348328	0.178432	FALSE
ALB	0.102753	0.0688186	FALSE
ALCAM	0.123817	0.836051	FALSE
ALDH16A1	0.289617	0.460994	FALSE
ALDH18A1	0.476969	0.569905	FALSE
ALDH1A1	0.129199	0.773374	FALSE
ALDH1A2	0.0606801	0.651134	FALSE
ALDH1A3	0.18862	0.727339	FALSE
ALDH1B1	0.288793	0.575282	FALSE
ALDH1L1	0.12175	0.640298	FALSE
ALDH1L2	0.0940243	0.739316	FALSE
ALDH2	0.212718	0.656948	FALSE
ALDH3A1	0.20794	0.589377	FALSE
ALDH3A2	0.446631	0.778451	FALSE
ALDH3B1	0.117998	0.536301	FALSE
ALDH4A1	0.33545	0.731735	FALSE
ALDH5A1	0.290349	0.704302	FALSE
ALDH6A1	0.375235	0.678473	FALSE
ALDH7A1	0.412848	0.651743	FALSE
ALDH8A1	0.223362	0.413747	FALSE
ALDH9A1	0.428876	0.652476	FALSE
ALDOA	0.343517	0.568222	FALSE
ALDOB	0.149611	0.204363	FALSE
ALDOC	0.390524	0.682035	FALSE
ALG1	0.523016	0.342711	FALSE
ALG10	0.538189	0.271324	FALSE
ALG10B	0.181623	0.00492975	FALSE
ALG11	0.595378	0.354249	FALSE
ALG12	0.516397	0.191623	FALSE
ALG13	0.369753	0.132156	FALSE
ALG14	0.435131	0.347254	FALSE
ALG1L2	0.360785	0.102842	FALSE
ALG2	0.687253	0.526903	FALSE
ALG3	0.640988	0.427358	FALSE
ALG5	0.555469	0.42901	FALSE
ALG6	0.45839	0.320797	FALSE
ALG8	0.566401	0.30801	FALSE
ALG9	0.547579	0.334935	FALSE
ALKAL2	0.0728316	-0.3	FALSE
ALKBH1	0.740662	0.346785	FALSE
ALKBH2	0.292587	0.372501	FALSE
ALKBH3	0.422084	0.462479	FALSE
ALKBH4	0.6024	0.285579	FALSE
ALKBH5	0.544517	0.429254	FALSE
ALKBH6	0.371661	0.170771	FALSE
ALKBH7	0.287263	0.191407	FALSE
ALKBH8	0.393265	0.50645	FALSE
ALMS1	0.406453	0.211972	FALSE
ALOX12	0.13221	0.192818	FALSE
ALOX12B	0.21075	0.228412	FALSE
ALOX15	0.0888577	0.621246	FALSE
ALOX15B	0.000452681	0.601057	FALSE
ALOX5	-0.0209856	0.765493	FALSE
ALOX5AP	0.0925069	0.549897	FALSE
ALOXE3	0.171155	0.250872	FALSE
ALPG	0.139445	0.79752	FALSE
ALPI	0.171365	0.798987	FALSE
ALPK1	0.436503	0.422648	FALSE
ALPK2	0.201984	0.287708	FALSE
ALPK3	0.260108	0.589596	FALSE
ALPL	0.106306	0.765772	FALSE
ALPP	0.138978	0.725043	FALSE
ALS2	0.622692	0.368159	FALSE
ALS2CL	0.353909	0.363959	FALSE
ALYREF	0.544578	0.299592	TRUE
AMACR	0.146631	0.575758	FALSE
AMBP	0.206985	-0.0384726	FALSE
AMBRA1	0.615329	0.124468	FALSE
AMD1	0.353258	0.379887	FALSE
AMDHD1	0.0296655	0.676974	FALSE
AMDHD2	0.272136	0.32379	FALSE
AMER1	0.235758	0.380303	FALSE
AMFR	0.48872	0.354778	TRUE
AMIGO2	-0.111251	0.412334	FALSE
AMMECR1	0.0821291	0.550218	FALSE
AMMECR1L	0.604329	0.247783	FALSE
AMN	0.366765	0.559235	TRUE
AMN1	0.319737	0.376806	FALSE
AMOT	0.163755	0.557795	TRUE
AMOTL1	0.284107	0.577658	TRUE
AMOTL2	0.373674	0.338292	TRUE
AMPD1	0.0154667	0.317548	FALSE
AMPD2	0.371636	0.472716	FALSE
AMPD3	0.196443	0.49419	FALSE
AMPH	0.0409015	0.552453	FALSE
AMT	0.0602152	0.531093	FALSE
AMY1B	0.170523	0.475991	FALSE
AMY2A	-0.0743334	-0.122837	FALSE
AMY2B	-0.0235222	0.2	FALSE
AMZ2	0.552413	0.305586	FALSE
ANAPC1	0.506606	0.210902	TRUE
ANAPC10	0.467333	0.0695199	TRUE
ANAPC11	0.496285	0.107263	FALSE
ANAPC13	0.386033	0.0804692	FALSE
ANAPC15	0.461074	0.064269	FALSE
ANAPC16	0.424201	0.0489701	FALSE
ANAPC2	0.606417	0.25957	TRUE
ANAPC4	0.511826	0.190048	TRUE
ANAPC5	0.587018	0.0913216	TRUE
ANAPC7	0.570659	0.262404	TRUE
ANG	0.19627	0.12164	TRUE
ANGEL1	0.59565	0.344888	FALSE
ANGEL2	0.628783	0.483104	FALSE
ANGPT1	-0.25856	0.378828	FALSE
ANGPT2	0.0749887	0.512576	FALSE
ANGPT4	0.0623707	0.8	FALSE
ANGPTL1	0.0935748	0.222342	FALSE
ANGPTL2	0.0740885	0.628888	FALSE
ANGPTL3	0.240303	0.373617	FALSE
ANGPTL4	0.190423	0.587389	TRUE
ANGPTL6	0.0790523	-0.0295023	FALSE
ANGPTL7	0.299809	0.200165	FALSE
ANGPTL8	0.199499	0.370565	FALSE
ANK1	0.115898	-0.00274911	FALSE
ANK2	0.049206	0.435462	FALSE
ANK3	0.20612	0.651352	TRUE
ANKDD1A	0.110348	0.45	FALSE
ANKFN1	0.100306	0.082365	FALSE
ANKFY1	0.485863	0.497157	FALSE
ANKH	0.170075	0.425018	FALSE
ANKHD1	0.555394	0.239579	FALSE
ANKHD1.EIF4EBP3	0.241921	0.294242	FALSE
ANKIB1	0.631189	0.445324	FALSE
ANKK1	0.248337	-0.0350035	FALSE
ANKLE2	0.484986	0.559928	FALSE
ANKMY2	0.566102	0.706125	FALSE
ANKRA2	0.403813	0.642857	TRUE
ANKRD1	0.216345	0.326023	FALSE
ANKRD10	0.555009	0.488518	FALSE
ANKRD11	0.459646	0.139153	TRUE
ANKRD12	0.434539	0.126819	FALSE
ANKRD13A	0.276918	0.661084	FALSE
ANKRD13C	0.556572	-0.268284	FALSE
ANKRD13D	0.420532	0.279084	FALSE
ANKRD16	0.425831	0.237697	FALSE
ANKRD17	0.480547	0.376766	FALSE
ANKRD18A	-0.0160354	-0.00768717	FALSE
ANKRD2	0.0478391	0.516609	FALSE
ANKRD20A4	0.110642	0.0323077	FALSE
ANKRD22	0.0480681	0.663062	FALSE
ANKRD23	0.223344	0.820779	FALSE
ANKRD26	0.430681	0.124254	FALSE
ANKRD27	0.504733	0.538749	FALSE
ANKRD28	0.468255	0.433192	TRUE
ANKRD29	0.208654	0.107293	FALSE
ANKRD30A	-0.0986843	0.0943709	FALSE
ANKRD30B	0.0779364	0.037312	FALSE
ANKRD31	0.28001	-0.120273	FALSE
ANKRD35	-0.139144	0.444184	FALSE
ANKRD36	0.258485	0.114229	FALSE
ANKRD39	0.477908	0.144984	FALSE
ANKRD40	0.602504	0.433672	FALSE
ANKRD42	0.264805	0.745981	FALSE
ANKRD44	0.0733107	0.677519	FALSE
ANKRD45	0.177384	0.630946	FALSE
ANKRD46	0.578439	0.158562	FALSE
ANKRD49	0.555763	0.280083	FALSE
ANKRD50	0.406234	0.59092	FALSE
ANKRD52	0.410991	0.284818	FALSE
ANKRD54	0.473409	0.352394	FALSE
ANKRD6	0.436157	0.468128	FALSE
ANKRD62	0.0782819	-0.21549	FALSE
ANKRD65	0.0592784	0.180543	FALSE
ANKRD9	0.5344	0.485714	FALSE
ANKS1A	0.470956	0.448244	FALSE
ANKS1B	0.245046	-0.0245164	FALSE
ANKS3	0.517761	0.148768	FALSE
ANKS4B	0.112423	0.60257	FALSE
ANKS6	0.4115	0.401111	TRUE
ANKZF1	0.417022	0.385315	FALSE
ANLN	0.277493	0.725844	FALSE
ANO1	0.159499	0.737205	FALSE
ANO10	0.33124	0.538194	FALSE
ANO2	-0.0177059	-0.0573171	FALSE
ANO5	0.104658	0.123494	FALSE
ANO6	0.265177	0.430051	FALSE
ANO8	0.211095	0.303074	FALSE
ANO9	0.210904	0.306024	FALSE
ANOS1	0.0328045	0.569647	TRUE
ANP32A	0.514771	0.469241	TRUE
ANP32B	0.351776	0.426854	TRUE
ANP32C	-0.0845521	0.522233	FALSE
ANP32E	0.403212	0.591044	FALSE
ANPEP	0.0140669	0.698951	FALSE
ANTXR1	-0.00377399	0.717046	FALSE
ANTXR2	0.23371	0.554126	FALSE
ANXA1	0.216407	0.789826	FALSE
ANXA10	0.299831	0.375566	FALSE
ANXA11	0.438368	0.659868	FALSE
ANXA13	0.113452	0.350325	FALSE
ANXA2	0.34662	0.648704	TRUE
ANXA3	0.211748	0.651084	FALSE
ANXA4	0.29174	0.666069	FALSE
ANXA5	0.285204	0.562898	FALSE
ANXA6	0.182631	0.655981	TRUE
ANXA7	0.534954	0.556647	TRUE
ANXA8	0.213635	0.623056	FALSE
ANXA8L1	0.186793	0.725769	FALSE
ANXA9	0.0988679	0.495786	FALSE
AOAH	-0.152463	0.72304	FALSE
AOC1	0.0650217	0.712509	FALSE
AOC2	0.507657	-0.0992468	FALSE
AOC3	0.0427815	0.642531	FALSE
AOX1	0.0547662	0.675551	FALSE
AP1AR	0.475157	0.368171	TRUE
AP1B1	0.315991	0.319685	TRUE
AP1G1	0.619885	0.576419	TRUE
AP1G2	0.53681	0.392652	TRUE
AP1M1	0.402932	0.415651	TRUE
AP1M2	0.31109	0.375359	TRUE
AP1S1	0.478789	0.245282	TRUE
AP1S2	0.153669	0.442368	TRUE
AP1S3	0.404678	0.604968	TRUE
AP2A1	0.34021	0.332646	TRUE
AP2A2	0.378557	0.43446	FALSE
AP2B1	0.407423	0.174778	FALSE
AP2M1	0.572718	0.19606	FALSE
AP2S1	0.299198	0.0859727	FALSE
AP3B1	0.647781	0.431094	TRUE
AP3B2	0.0903126	0.448913	TRUE
AP3D1	0.394387	0.285048	TRUE
AP3M1	0.592637	0.153703	TRUE
AP3M2	0.618837	0.373511	TRUE
AP3S1	0.475687	0.442074	TRUE
AP3S2	0.475474	0.314617	TRUE
AP4B1	0.428315	0.0170139	TRUE
AP4E1	0.498376	0.436777	TRUE
AP4M1	0.403384	0.157932	TRUE
AP4S1	0.643341	0.38584	TRUE
AP5B1	0.288821	0.193395	TRUE
AP5M1	0.549449	0.0987396	TRUE
AP5S1	0.561856	0.0649314	TRUE
AP5Z1	0.494022	0.208793	TRUE
APAF1	0.415882	0.501399	TRUE
APBA1	0.146873	0.352159	TRUE
APBA2	-0.0287765	0.451298	FALSE
APBA3	0.433234	0.190993	FALSE
APBB1	0.168591	0.554888	TRUE
APBB1IP	-0.0629161	0.724478	TRUE
APBB2	0.239767	0.690762	FALSE
APC	0.528335	0.318401	TRUE
APC2	0.493129	0.466637	FALSE
APCDD1	0.0550991	0.757692	FALSE
APCS	-0.0425556	0.251378	FALSE
APEH	0.450106	0.480219	FALSE
APEX1	0.551603	0.517419	TRUE
APEX2	0.384922	0.35565	FALSE
APH1A	0.439438	0.0362244	TRUE
API5	0.610989	0.290582	TRUE
APIP	0.424684	0.420058	FALSE
APLF	0.23676	0.371208	FALSE
APLP2	0.445061	0.590655	FALSE
APMAP	0.519508	0.606687	FALSE
APOA1	0.182826	0.043182	TRUE
APOA2	0.0500503	0.0867713	FALSE
APOA4	0.113365	-0.030194	FALSE
APOA5	0.087454	0.0771629	FALSE
APOB	0.106203	0.0538179	FALSE
APOBEC2	0.409075	0.747483	FALSE
APOBEC3A	-0.11535	0.421524	FALSE
APOBEC3B	0.23952	0.354293	FALSE
APOBEC3C	0.204949	0.616337	FALSE
APOBEC3D	0.11223	0.498104	FALSE
APOBEC3F	0.187179	0.486018	FALSE
APOBEC3G	0.0429239	0.744664	FALSE
APOBR	0.0549555	0.680919	FALSE
APOC1	-0.00184094	-0.00982673	FALSE
APOC2	0.0358601	-0.0199665	FALSE
APOC3	0.045835	-0.159864	FALSE
APOC4	-0.0185648	-0.0289919	FALSE
APOD	-0.0485343	0.309309	FALSE
APOE	-0.0206557	0.408276	FALSE
APOF	0.119957	0.0435489	FALSE
APOH	0.0108164	-0.0409826	FALSE
APOL1	0.182638	0.225695	TRUE
APOL2	0.279482	0.726894	FALSE
APOL3	0.0500685	0.692935	FALSE
APOL4	0.0573512	0.198547	FALSE
APOL6	0.128558	0.72179	FALSE
APOM	0.226391	-0.0100523	FALSE
APOO	0.334049	0.373036	TRUE
APOOL	0.273928	0.31842	TRUE
APOPT1	0.606565	-0.103498	FALSE
APP	0.364165	0.629653	TRUE
APPBP2	0.566469	0.274056	FALSE
APPL1	0.440531	0.532714	TRUE
APPL2	0.398699	0.605198	FALSE
APRT	0.523892	0.508636	FALSE
APTX	0.63833	0.461011	FALSE
AQP1	-0.00470133	0.537765	TRUE
AQP2	0.00545327	0.0533458	FALSE
AQP3	0.0801143	0.633811	FALSE
AQP4	0.0375008	0.498255	TRUE
AQP5	0.0981261	0.736407	FALSE
AQP7	0.195177	-0.0529412	FALSE
AQP8	-0.0157602	0.438941	FALSE
AQR	0.604532	0.134407	TRUE
AR	0.0251722	0.702011	TRUE
ARAF	0.405298	0.440803	TRUE
ARAP1	0.429249	0.45749	FALSE
ARAP2	0.364467	0.448831	FALSE
ARAP3	0.102469	0.604918	FALSE
ARCN1	0.647457	0.497937	FALSE
AREG	0.271935	0.611159	FALSE
ARF1	0.535009	0.169912	TRUE
ARF3	0.48131	0.197134	FALSE
ARF4	0.413904	0.522279	FALSE
ARF5	0.660196	0.488393	FALSE
ARF6	0.567018	0.46097	FALSE
ARFGAP1	0.671272	0.451625	FALSE
ARFGAP2	0.602538	0.467059	FALSE
ARFGAP3	0.501766	0.694787	FALSE
ARFGEF1	0.685259	0.672878	FALSE
ARFGEF2	0.590314	0.621699	FALSE
ARFGEF3	0.209913	0.866286	FALSE
ARFIP1	0.660052	0.549956	FALSE
ARFIP2	0.535794	0.616624	TRUE
ARFRP1	0.531865	0.373118	FALSE
ARG1	0.178491	0.150828	FALSE
ARG2	0.257417	0.745739	FALSE
ARGLU1	0.67188	0.300824	FALSE
ARHGAP1	0.309371	0.519447	FALSE
ARHGAP10	0.277427	0.710443	TRUE
ARHGAP11A	0.227922	-0.288391	FALSE
ARHGAP12	0.430533	0.648231	FALSE
ARHGAP15	-0.0545951	0.679903	FALSE
ARHGAP17	0.354785	0.408331	TRUE
ARHGAP18	0.177619	0.744906	FALSE
ARHGAP19	0.535477	0.289972	FALSE
ARHGAP21	0.431224	0.515507	FALSE
ARHGAP22	0.270902	0.322655	FALSE
ARHGAP23	0.180621	0.326576	FALSE
ARHGAP24	0.150476	0.479691	FALSE
ARHGAP25	-0.00925431	0.724917	FALSE
ARHGAP26	0.27393	0.70875	FALSE
ARHGAP27	0.186664	0.622635	FALSE
ARHGAP28	0.165288	0.435526	FALSE
ARHGAP29	0.323723	0.659915	FALSE
ARHGAP30	-0.114372	0.70083	FALSE
ARHGAP31	0.132128	0.676039	FALSE
ARHGAP32	0.328329	0.554557	FALSE
ARHGAP35	0.413314	0.597094	FALSE
ARHGAP39	0.524517	-0.0157587	FALSE
ARHGAP4	-0.0373257	0.810261	FALSE
ARHGAP42	0.332851	0.463742	FALSE
ARHGAP44	0.141938	0.445167	FALSE
ARHGAP45	0.178132	0.646937	FALSE
ARHGAP5	0.543741	0.578638	FALSE
ARHGAP6	-0.00208815	0.582847	FALSE
ARHGAP8	0.141963	0.645445	FALSE
ARHGAP9	-0.00798346	0.651639	FALSE
ARHGDIA	0.442794	0.288224	FALSE
ARHGDIB	-0.0347575	0.642456	FALSE
ARHGEF1	0.206266	0.557401	TRUE
ARHGEF10	0.399574	0.659593	FALSE
ARHGEF10L	0.289962	0.466272	FALSE
ARHGEF11	0.480409	0.480095	FALSE
ARHGEF12	0.483602	0.611199	FALSE
ARHGEF15	0.116344	0.293891	FALSE
ARHGEF16	0.357559	0.725186	FALSE
ARHGEF17	0.252	0.545735	FALSE
ARHGEF18	0.449618	0.454226	TRUE
ARHGEF19	0.28199	0.319169	FALSE
ARHGEF2	0.366825	0.63224	TRUE
ARHGEF25	0.0579473	0.330165	TRUE
ARHGEF26	0.202455	0.614091	FALSE
ARHGEF28	0.402204	0.617683	FALSE
ARHGEF3	0.391559	0.298103	FALSE
ARHGEF35	0.361372	0.535729	FALSE
ARHGEF37	0.28394	0.650504	FALSE
ARHGEF38	0.327874	0.740962	FALSE
ARHGEF39	0.509712	0.771429	FALSE
ARHGEF4	0.339803	0.603201	FALSE
ARHGEF40	0.178876	0.630739	FALSE
ARHGEF5	0.409804	0.577661	FALSE
ARHGEF6	-0.110382	0.699804	TRUE
ARHGEF7	0.581109	0.497168	TRUE
ARHGEF9	-0.26917	0.383932	FALSE
ARID1A	0.143474	0.228138	TRUE
ARID1B	0.419475	0.416221	TRUE
ARID2	0.498776	0.438501	TRUE
ARID3A	0.251888	0.533478	FALSE
ARID3B	0.326861	0.396938	FALSE
ARID4A	0.491386	0.433087	TRUE
ARID4B	0.577312	0.42295	TRUE
ARID5A	0.0683406	-0.0993402	FALSE
ARID5B	0.305229	0.38952	FALSE
ARIH1	0.658458	0.387697	FALSE
ARIH2	0.624418	0.354726	FALSE
ARL1	0.449051	0.314255	TRUE
ARL10	0.295362	0.405573	FALSE
ARL11	0.200098	0.339282	FALSE
ARL13A	0.393376	0.0486254	FALSE
ARL13B	0.528491	0.466781	FALSE
ARL14EP	0.536792	0.153687	FALSE
ARL15	0.266337	0.516955	FALSE
ARL16	0.353327	-0.035989	FALSE
ARL2	0.367482	0.297281	TRUE
ARL2BP	0.560383	0.504675	FALSE
ARL3	0.404829	0.596853	FALSE
ARL4A	0.587561	0.235815	FALSE
ARL4C	0.217591	0.632298	FALSE
ARL4D	0.12738	0.1	FALSE
ARL5A	0.351979	0.0343577	FALSE
ARL5B	0.516679	0.323604	FALSE
ARL6	0.375075	0.456056	FALSE
ARL6IP1	0.31659	0.237692	FALSE
ARL6IP4	0.439039	0.226424	FALSE
ARL6IP5	0.352393	0.401324	FALSE
ARL6IP6	0.433348	0.0720287	FALSE
ARL8A	0.515304	0.329803	FALSE
ARL8B	0.459092	0.302907	FALSE
ARMC1	0.653517	0.331594	FALSE
ARMC10	0.622766	0.433919	FALSE
ARMC2	0.472758	0.0890599	FALSE
ARMC3	0.227022	0.567341	FALSE
ARMC4	0.161586	0.236859	FALSE
ARMC5	0.323592	0.0348946	FALSE
ARMC6	0.408977	0.469378	FALSE
ARMC7	0.326638	0.153654	FALSE
ARMC8	0.581142	0.440011	TRUE
ARMC9	0.210959	0.5547	FALSE
ARMCX1	0.050026	0.525152	FALSE
ARMCX2	0.00921752	0.588382	FALSE
ARMCX3	0.299398	0.636155	FALSE
ARMCX4	0.407789	0.0268773	FALSE
ARMCX5	0.357609	0.217898	FALSE
ARMCX6	0.063485	0.208926	FALSE
ARMH3	0.649003	0.60282	FALSE
ARMT1	0.459759	0.576853	FALSE
ARNT	0.539748	0.384344	TRUE
ARNT2	0.170131	0.499959	FALSE
ARNTL	0.318609	0.33781	TRUE
ARNTL2	0.383019	0.102588	FALSE
ARPC1A	0.603563	-0.0558966	FALSE
ARPC1B	0.357698	0.454145	TRUE
ARPC2	0.547364	0.394481	TRUE
ARPC3	0.401099	0.0793363	TRUE
ARPC4	0.575554	0.233631	TRUE
ARPC5	0.372663	0.27773	TRUE
ARPC5L	0.481091	0.411665	FALSE
ARPIN	0.303262	0.200248	FALSE
ARPP19	0.590423	0.400693	FALSE
ARPP21	0.140144	0.831533	FALSE
ARR3	0.126825	0.0177016	FALSE
ARRB1	0.259909	0.67977	TRUE
ARRB2	0.291499	0.602725	TRUE
ARRDC1	0.458758	0.402014	FALSE
ARSA	0.273575	0.531748	FALSE
ARSB	0.258818	0.579264	FALSE
ARSD	0.255996	0.505974	FALSE
ARSE	0.248661	0.485445	FALSE
ARSF	-0.0816583	0.567486	FALSE
ARSH	0.205067	0.0289764	FALSE
ARSI	-0.0397793	0.269005	FALSE
ARSK	0.427379	0.439889	FALSE
ART3	0.132169	0.272928	FALSE
ART4	-0.0669621	0.319169	FALSE
ARV1	0.525255	0.177929	FALSE
ARVCF	0.29754	0.587791	FALSE
ARX	0.0828848	0.577833	FALSE
AS3MT	0.0719914	0.785733	FALSE
ASAH1	0.467364	0.4913	TRUE
ASAP1	0.262847	0.5378	TRUE
ASAP2	0.317032	0.696589	FALSE
ASAP3	0.254987	0.579341	FALSE
ASB1	0.505886	0.225022	TRUE
ASB10	-0.00644549	0.364732	FALSE
ASB13	0.325094	0.35405	FALSE
ASB2	0.203352	0.3	TRUE
ASB6	0.525718	0.31994	TRUE
ASB7	0.614874	0.253569	TRUE
ASB8	0.27522	0.341589	FALSE
ASB9	0.20408	0.407776	TRUE
ASCC1	0.520958	0.141451	TRUE
ASCC2	0.507622	0.223508	TRUE
ASCC3	0.423521	0.601508	TRUE
ASCL2	0.366437	0.105882	FALSE
ASDURF	0.0730383	0.233953	FALSE
ASF1A	0.498032	0.443553	TRUE
ASF1B	0.275073	0.489871	TRUE
ASGR1	-0.01817	0.4	FALSE
ASGR2	0.0824803	0.128301	FALSE
ASH1L	0.647492	0.157863	FALSE
ASH2L	0.766573	0.536541	TRUE
ASL	0.378953	0.72355	FALSE
ASMTL	0.442282	0.695035	FALSE
ASNA1	0.385102	0.402851	FALSE
ASNS	0.391952	0.697272	FALSE
ASNSD1	0.541828	0.173862	FALSE
ASPA	0.218276	0.594191	FALSE
ASPDH	-0.020236	0.236076	FALSE
ASPG	0.302284	0.727756	FALSE
ASPH	0.389545	0.610132	FALSE
ASPHD2	0.172228	0.609972	FALSE
ASPM	0.277559	0.161211	FALSE
ASPN	0.00487256	0.628616	FALSE
ASPRV1	0.0201802	0.615049	FALSE
ASPSCR1	0.445006	0.52563	FALSE
ASRGL1	0.135587	0.799087	FALSE
ASS1	0.175739	0.783347	FALSE
ASTE1	0.578657	0.320244	FALSE
ASTN2	0.369106	0.19377	FALSE
ASUN	0.582625	0.424984	FALSE
ASXL1	0.593522	0.3	TRUE
ASXL2	0.433661	0.148342	FALSE
ASXL3	0.23791	0.03779	FALSE
ATAD1	0.63792	0.3739	FALSE
ATAD2	0.506882	0.661703	FALSE
ATAD2B	0.478923	0.328875	FALSE
ATAD3A	0.358947	0.507257	FALSE
ATAD3B	0.339769	0.30222	FALSE
ATAD5	0.386079	0.0489432	FALSE
ATAT1	0.415884	0.392914	FALSE
ATE1	0.580893	0.597424	FALSE
ATF1	0.382167	0.367478	FALSE
ATF2	0.541425	0.348422	TRUE
ATF3	0.0146634	0.487565	FALSE
ATF6	0.500446	0.193344	FALSE
ATF6B	0.305791	0.274184	FALSE
ATF7	0.368069	0.229126	FALSE
ATF7IP	0.263374	0.327091	TRUE
ATG10	0.337166	0.536499	FALSE
ATG101	0.626914	0.26031	TRUE
ATG12	0.640822	0.167005	FALSE
ATG13	0.557451	0.387445	TRUE
ATG14	0.644229	0.27241	TRUE
ATG16L1	0.539811	0.440491	TRUE
ATG16L2	0.182819	0.434441	FALSE
ATG2A	0.294652	0.185672	FALSE
ATG2B	0.641817	0.578564	FALSE
ATG3	0.536217	0.498759	FALSE
ATG4A	0.175017	0.464479	FALSE
ATG4B	0.505781	0.411433	FALSE
ATG4C	0.393113	0.331264	FALSE
ATG4D	0.479694	0.0454545	FALSE
ATG5	0.578886	0.352661	FALSE
ATG7	0.521398	0.60783	FALSE
ATG9A	0.413935	0.355106	FALSE
ATIC	0.419581	0.518831	FALSE
ATL1	0.206922	0.656552	TRUE
ATL2	0.435824	0.460466	TRUE
ATL3	0.29442	0.460453	TRUE
ATM	0.403951	0.504573	TRUE
ATN1	0.419747	0.271296	FALSE
ATOX1	0.413177	0.47361	FALSE
ATP10A	0.117475	-0.0420212	FALSE
ATP10D	0.376605	0.292406	FALSE
ATP11A	0.368653	0.507776	FALSE
ATP11B	0.445895	0.365937	FALSE
ATP11C	0.261039	0.417632	FALSE
ATP12A	0.0151944	0.211863	FALSE
ATP13A1	0.374601	0.268956	FALSE
ATP13A2	0.324863	0.227317	FALSE
ATP13A3	0.554831	0.464527	FALSE
ATP13A4	0.092923	0.573381	FALSE
ATP1A1	0.224366	0.4079	FALSE
ATP1A2	-0.0818027	0.335687	FALSE
ATP1A3	0.102848	-0.0424225	FALSE
ATP1B1	0.255555	0.504763	TRUE
ATP1B2	0.0434148	0.328624	FALSE
ATP1B3	0.299714	0.486487	FALSE
ATP1B4	-0.0562966	0.685215	FALSE
ATP23	0.210781	0.342105	FALSE
ATP2A1	0.0831197	0.297258	TRUE
ATP2A2	0.420148	0.302606	TRUE
ATP2A3	0.124921	0.541512	FALSE
ATP2B1	0.335048	0.565935	FALSE
ATP2B2	0.0167784	0.227164	FALSE
ATP2B3	0.0602011	0.0102741	FALSE
ATP2B4	0.272531	0.476789	FALSE
ATP2C1	0.419054	0.418823	FALSE
ATP2C2	0.417558	0.582041	FALSE
ATP4A	0.428969	-0.0251005	TRUE
ATP5A1	0.557773	0.345647	TRUE
ATP5B	0.284482	0.144332	TRUE
ATP5C1	0.484317	0.0822707	TRUE
ATP5D	0.306844	0.155697	TRUE
ATP5E	0.460742	-0.0368642	TRUE
ATP5F1	0.573838	0.0758528	TRUE
ATP5F1A	0.496336	0.162223	FALSE
ATP5F1B	0.52958	0.0376351	FALSE
ATP5F1C	0.472282	0.0803302	FALSE
ATP5F1D	0.370252	0.186221	FALSE
ATP5F1E	0.561828	-0.113304	FALSE
ATP5G1	0.277868	0.134811	TRUE
ATP5H	0.586285	0.163385	TRUE
ATP5I	0.458498	0.0573764	TRUE
ATP5IF1	0.415756	0.63736	FALSE
ATP5J	0.515079	0.138225	TRUE
ATP5J2.PTCD1	0.209064	0.0485863	FALSE
ATP5L	0.348561	0.0224226	TRUE
ATP5MC1	0.384062	0.165947	FALSE
ATP5MD	0.52299	-0.0689485	FALSE
ATP5ME	0.477086	0.0792061	FALSE
ATP5MF	0.56223	0.00160421	FALSE
ATP5MF.PTCD1	0.215744	-0.132607	FALSE
ATP5MG	0.462599	0.0986718	FALSE
ATP5MPL	0.53273	0.0098375	FALSE
ATP5O	0.533564	0.10089	TRUE
ATP5PB	0.637284	0.012222	FALSE
ATP5PD	0.587803	-0.109596	FALSE
ATP5PF	0.547113	0.0897193	FALSE
ATP5PO	0.565873	0.184746	FALSE
ATP5S	0.383333	0.242986	FALSE
ATP5SL	0.302042	0.125359	FALSE
ATP6AP1	0.373683	0.349543	FALSE
ATP6AP2	0.355566	0.253594	FALSE
ATP6V0A1	0.295554	0.342554	FALSE
ATP6V0A2	0.426339	0.292763	FALSE
ATP6V0A4	0.191733	0.380271	FALSE
ATP6V0C	0.36778	0.201785	TRUE
ATP6V0D1	0.50994	0.430606	TRUE
ATP6V0D2	0.0716685	0.444515	FALSE
ATP6V1A	0.503762	0.356631	TRUE
ATP6V1B1	0.236897	0.414293	FALSE
ATP6V1B2	0.511325	0.653963	TRUE
ATP6V1C1	0.676369	0.531424	FALSE
ATP6V1C2	0.27108	0.439513	FALSE
ATP6V1D	0.51655	0.204329	FALSE
ATP6V1E1	0.431932	0.146228	FALSE
ATP6V1E2	0.180789	0.13208	FALSE
ATP6V1F	0.46305	0.319822	FALSE
ATP6V1G1	0.535515	0.093494	FALSE
ATP6V1G2	0.266592	0.379991	FALSE
ATP6V1G3	-0.292031	0.19325	FALSE
ATP6V1H	0.655292	0.255872	FALSE
ATP7A	0.268001	0.55058	FALSE
ATP7B	0.273209	0.280985	FALSE
ATP8A1	0.258545	0.420883	FALSE
ATP8A2	0.372399	0.182812	FALSE
ATP8B1	0.265945	0.653592	FALSE
ATP8B2	0.062178	-0.111411	FALSE
ATP8B3	0.219866	-0.0119344	FALSE
ATP8B4	0.0379737	0.277737	FALSE
ATP9A	0.381155	0.595451	FALSE
ATP9B	0.565347	0.216941	FALSE
ATPAF1	0.416512	0.401104	FALSE
ATPAF2	0.631275	0.227271	FALSE
ATPIF1	0.366666	0.511804	TRUE
ATR	0.553716	0.251483	TRUE
ATRAID	0.389453	0.235182	FALSE
ATRIP	0.353029	0.140768	TRUE
ATRN	0.602043	0.281546	FALSE
ATRNL1	0.041327	0.143054	FALSE
ATRX	0.329031	0.510977	TRUE
ATXN1	0.179998	0.544008	TRUE
ATXN10	0.486039	0.522603	FALSE
ATXN1L	0.612037	0.355447	FALSE
ATXN2	0.445818	0.341347	FALSE
ATXN2L	0.332537	0.20617	FALSE
ATXN3	0.599293	0.536928	FALSE
ATXN7	0.573922	0.32647	TRUE
ATXN7L2	0.395093	0.246974	TRUE
ATXN7L3	0.332595	0.200251	TRUE
ATXN7L3B	0.499246	0.37677	FALSE
AUH	0.575616	0.518642	FALSE
AUP1	0.460232	0.410539	TRUE
AURKA	0.46307	0.435654	TRUE
AURKAIP1	0.590224	0.319899	FALSE
AURKB	0.173643	0.576296	TRUE
AUTS2	0.296206	0.479176	FALSE
AVEN	0.394121	0.464471	FALSE
AVIL	0.162749	-0.0155041	FALSE
AVL9	0.630894	0.577432	FALSE
AVPR1B	0.379661	-0.516484	FALSE
AXIN1	0.458369	0.135254	TRUE
AXL	0.117879	0.408139	FALSE
AZGP1	0.128506	0.246504	TRUE
AZI2	0.435577	0.289087	TRUE
AZIN2	0.165934	0.092137	FALSE
AZU1	0.0574431	-0.0115849	FALSE
B2M	0.246277	0.613817	FALSE
B3GALNT1	0.346254	0.395976	FALSE
B3GALNT2	0.553789	0.092051	FALSE
B3GALT5	0.101053	0.470856	FALSE
B3GALT6	0.44592	0.278705	FALSE
B3GAT3	0.352035	0.449758	FALSE
B3GLCT	0.33488	0.72554	FALSE
B3GNT2	0.26785	0.155514	FALSE
B3GNT3	0.212678	0.550965	FALSE
B3GNT5	0.437256	0.485281	FALSE
B3GNT6	0.159529	0.448867	FALSE
B3GNT7	0.105653	0.675577	FALSE
B3GNT8	0.0787041	0.308312	FALSE
B3GNT9	0.340008	0.400612	FALSE
B3GNTL1	0.171955	0.25405	FALSE
B4GALNT3	0.264851	0.326932	FALSE
B4GALT1	0.330261	0.48981	FALSE
B4GALT2	0.612493	0.20526	FALSE
B4GALT3	0.533778	0.272281	FALSE
B4GALT4	0.351021	0.498828	FALSE
B4GALT5	0.50787	0.322395	FALSE
B4GALT7	0.462426	0.340522	FALSE
B4GAT1	0.293576	0.385049	FALSE
B9D1	0.28065	0.328885	FALSE
B9D2	0.254523	0.357064	FALSE
BAALC	0.18593	0.398601	FALSE
BAAT	-0.278317	0.47619	FALSE
BABAM1	0.443156	0.255399	FALSE
BABAM2	0.315715	0.317139	FALSE
BACE2	0.137318	0.478438	FALSE
BACH1	0.37455	0.579042	TRUE
BAD	0.401624	0.182192	FALSE
BAG1	0.474998	0.592484	TRUE
BAG2	0.251393	0.716247	FALSE
BAG3	0.355789	0.512083	FALSE
BAG4	0.780673	0.576423	FALSE
BAG5	0.693114	0.647643	TRUE
BAG6	0.454154	0.281404	TRUE
BAHCC1	0.233485	-0.0328915	FALSE
BAHD1	0.338508	0.196528	FALSE
BAIAP2	0.337645	0.718212	FALSE
BAIAP2L1	0.476697	0.726424	FALSE
BAIAP2L2	0.171158	0.677534	FALSE
BAK1	0.310043	0.433441	TRUE
BANF1	0.4387	0.158697	TRUE
BANK1	0.163081	0.546585	FALSE
BANP	0.278462	0.299879	TRUE
BAP1	0.482489	0.158221	FALSE
BARD1	0.389773	0.0936142	TRUE
BARX2	0.036089	0.476471	FALSE
BASP1	0.044996	0.723277	FALSE
BAX	0.291374	0.491891	TRUE
BAZ1A	0.515574	0.591956	TRUE
BAZ1B	0.663804	0.505911	TRUE
BAZ2A	0.388257	0.292421	TRUE
BAZ2B	0.357667	0.201455	FALSE
BBC3	0.12466	0.391123	FALSE
BBIP1	0.520494	0.217476	TRUE
BBOX1	0.197608	0.769165	FALSE
BBS1	0.364841	0.323556	TRUE
BBS10	0.48234	-0.0128813	TRUE
BBS12	0.299954	0.560591	TRUE
BBS2	0.465348	0.45982	TRUE
BBS4	0.518513	0.459019	TRUE
BBS5	0.0833846	0.151957	TRUE
BBS7	0.411515	0.267244	TRUE
BBS9	0.452095	0.278529	TRUE
BBX	0.347764	0.456892	FALSE
BCAM	0.185259	0.614255	FALSE
BCAN	0.503213	0.6	FALSE
BCAP29	0.367903	0.403857	FALSE
BCAP31	0.413996	0.573322	FALSE
BCAR1	0.429471	0.349094	TRUE
BCAR3	0.272784	0.702382	FALSE
BCAS1	0.045264	0.725655	FALSE
BCAS2	0.501037	0.0673167	TRUE
BCAS3	0.401986	0.411438	FALSE
BCAS4	0.281789	0.236117	FALSE
BCAT1	0.0906481	0.786992	FALSE
BCAT2	0.403027	0.559744	FALSE
BCCIP	0.623714	0.374473	TRUE
BCDIN3D	0.434814	0.339323	FALSE
BCHE	0.0206204	0.3816	FALSE
BCKDHA	0.348437	0.288544	FALSE
BCKDHB	0.414968	0.519464	FALSE
BCKDK	0.405527	0.403945	FALSE
BCL10	0.478744	0.417029	TRUE
BCL11A	0.235916	0.431201	FALSE
BCL11B	0.132374	0.177984	FALSE
BCL2	0.33485	0.462271	TRUE
BCL2A1	0.0576588	0.3	FALSE
BCL2L1	0.405046	0.626497	TRUE
BCL2L11	0.262693	0.285658	FALSE
BCL2L12	0.310448	-0.0493727	FALSE
BCL2L13	0.632754	0.568567	FALSE
BCL2L14	0.271618	0.563447	FALSE
BCL2L15	0.129977	0.555991	FALSE
BCL2L2	0.583	0.477531	FALSE
BCL2L2.PABPN1	0.604447	-0.242091	FALSE
BCL3	0.132091	0.330717	TRUE
BCL6	0.201581	0.347285	TRUE
BCL7A	0.41444	0.569211	FALSE
BCL7B	0.586353	0.204398	FALSE
BCL7C	0.368817	0.0601231	FALSE
BCL9	0.438721	0.395472	FALSE
BCL9L	0.25167	0.319308	FALSE
BCLAF1	0.472346	0.22478	FALSE
BCLAF3	0.0711491	0.48893	FALSE
BCO1	0.347032	0.689582	FALSE
BCO2	0.125712	-0.046728	FALSE
BCOR	0.13364	0.264362	TRUE
BCORL1	0.153688	0.240565	FALSE
BCR	0.378134	0.552915	FALSE
BCS1L	0.450317	0.380058	FALSE
BDH1	0.324963	0.621465	FALSE
BDH2	0.310339	0.602217	FALSE
BDP1	0.587129	0.163511	TRUE
BECN1	0.508933	0.150218	TRUE
BEND3	0.261717	0.540015	FALSE
BEND5	0.269424	0.150234	FALSE
BEND7	0.330585	0.512099	FALSE
BEST1	-0.0539969	0.136364	FALSE
BET1	0.442128	0.465581	FALSE
BET1L	0.548031	0.348762	FALSE
BEX5	0.136066	0.380952	FALSE
BFAR	0.527261	0.428496	TRUE
BGLAP	0.159189	0.6	FALSE
BGN	-0.00121526	0.520673	FALSE
BHLHA15	-0.0322223	0.598065	FALSE
BHLHE40	0.188832	0.424372	FALSE
BHLHE41	0.321639	0.467717	FALSE
BHMT	0.163368	0.858058	FALSE
BHMT2	0.324852	0.605959	FALSE
BICC1	0.0127922	0.674244	FALSE
BICD1	0.306501	0.597431	FALSE
BICD2	0.459957	0.534602	TRUE
BICDL1	0.207172	0.289953	FALSE
BICDL2	0.27243	0.646403	FALSE
BICRA	0.107651	0.0716942	FALSE
BICRAL	-0.0175007	0.377057	FALSE
BID	0.223201	0.611208	FALSE
BIN1	0.25459	0.476294	TRUE
BIN2	0.00055919	0.680626	FALSE
BIN3	0.75195	0.319704	FALSE
BIRC2	0.476545	0.293987	TRUE
BIRC3	0.0758491	0.561259	TRUE
BIRC5	0.414415	0.476406	TRUE
BIRC6	0.514865	0.206994	FALSE
BLK	0.202767	0.0819185	FALSE
BLM	0.294554	0.385648	TRUE
BLMH	0.445091	0.737459	FALSE
BLNK	0.190174	0.635489	TRUE
BLOC1S1	0.313298	0.0616933	TRUE
BLOC1S2	0.409126	0.275897	TRUE
BLOC1S3	0.409264	0.0928613	TRUE
BLOC1S4	0.534612	0.10203	TRUE
BLOC1S5	0.611644	0.177131	TRUE
BLOC1S6	0.591071	0.127723	TRUE
BLVRA	0.229435	0.754289	TRUE
BLVRB	0.243993	0.433357	FALSE
BLZF1	0.460127	0.255997	FALSE
BMF	-0.0919307	0.327301	FALSE
BMP1	0.25184	0.592316	FALSE
BMP2	0.187788	0.8	TRUE
BMP2K	0.264258	0.582426	FALSE
BMP3	0.262742	0.243806	FALSE
BMP5	0.130919	0.397881	FALSE
BMP7	0.142377	0.72381	FALSE
BMP8B	0.0489011	0.3	FALSE
BMPER	0.0532421	0.373868	FALSE
BMPR1B	0.388229	0.582258	FALSE
BMPR2	0.424894	0.292488	FALSE
BMS1	0.492125	0.330524	FALSE
BMT2	0.455225	0.512557	FALSE
BMX	0.212782	0.17001	FALSE
BNC1	0.211689	0.630713	FALSE
BNC2	0.0215738	0.0843572	FALSE
BNIP1	0.439702	0.376685	FALSE
BNIP2	0.492104	0.393682	FALSE
BNIP3	0.208964	0.536824	FALSE
BNIP3L	0.593282	0.381498	FALSE
BNIPL	-0.0429018	0.669433	FALSE
BOC	0.0324143	0.518182	FALSE
BOD1	0.466802	0.46187	TRUE
BOD1L1	0.527057	0.370134	TRUE
BOD1L2	0.212331	0.28673	FALSE
BOK	0.229061	0.303383	FALSE
BOLA1	0.473057	0.409346	FALSE
BOLA2	0.197509	0.429311	TRUE
BOLA3	0.310954	0.466795	FALSE
BOP1	0.580621	0.597119	TRUE
BORCS5	0.519032	0.288245	TRUE
BORCS6	0.457327	0.350672	TRUE
BORCS7	0.327239	0.455664	TRUE
BORCS8	0.388106	0.0681566	TRUE
BPGM	0.333893	0.22809	FALSE
BPHL	0.503237	0.578232	FALSE
BPI	0.00703499	0.211399	FALSE
BPIFA1	0.116827	0.0628442	FALSE
BPIFA2	0.00209811	-0.145087	FALSE
BPIFB1	-0.0465446	0.630793	FALSE
BPIFB2	-0.115861	0.610928	FALSE
BPIFB4	-0.17733	-1	FALSE
BPIFB6	0.26768	-0.210101	FALSE
BPIFC	0.0257045	0.0857143	FALSE
BPNT1	0.511522	0.582344	FALSE
BPTF	0.428657	0.355517	TRUE
BRAF	0.466513	0.353417	TRUE
BRAP	0.611626	0.338068	FALSE
BRAT1	0.604221	0.394432	FALSE
BRCA1	0.411198	0.550029	TRUE
BRCA2	0.244347	-0.0640476	TRUE
BRCC3	0.341469	-0.0652044	TRUE
BRD1	0.427802	0.273263	TRUE
BRD2	0.447483	0.394912	FALSE
BRD3	0.465398	0.506596	FALSE
BRD4	0.297143	0.26079	TRUE
BRD7	0.653688	0.0323236	TRUE
BRD8	0.490324	0.272182	TRUE
BRD9	0.586112	0.226	FALSE
BRDT	0.149279	0.192457	FALSE
BRE	0.265288	0.154484	TRUE
BRF1	0.451309	0.32881	TRUE
BRF2	0.693872	0.505672	FALSE
BRI3	0.3832	0.259137	FALSE
BRI3BP	0.411257	0.381266	FALSE
BRINP3	0.167639	0.110484	FALSE
BRIP1	0.466003	0.170107	TRUE
BRIX1	0.551971	0.456806	TRUE
BRK1	0.406947	0.192777	TRUE
BRMS1	0.516621	0.0721508	TRUE
BRMS1L	0.617613	0.435719	TRUE
BROX	0.59968	0.589702	FALSE
BRPF1	0.449636	0.21881	TRUE
BRPF3	0.31107	0.136203	TRUE
BRWD1	0.529788	0.0931579	FALSE
BRWD3	0.296459	0.143582	FALSE
BSCL2	0.381625	0.408083	FALSE
BSDC1	0.55775	0.474426	FALSE
BSG	0.284719	0.218094	TRUE
BSN	0.156832	-0.152265	FALSE
BSND	-0.167446	0.0202756	FALSE
BSPRY	0.425891	0.750677	FALSE
BST1	0.175346	0.44466	FALSE
BST2	0.0509152	0.80352	FALSE
BSX	-0.101249	0.786245	FALSE
BTAF1	0.521501	0.307169	FALSE
BTBD1	0.559581	0.193385	FALSE
BTBD10	0.573948	0.289503	FALSE
BTBD11	0.161625	0.620212	FALSE
BTBD16	0.162164	0.0680869	FALSE
BTBD19	0.104167	0.4	FALSE
BTBD2	0.403648	0.118371	FALSE
BTBD3	-0.0154029	0.238095	FALSE
BTBD7	0.728517	0.258551	FALSE
BTBD9	0.348958	0.196272	FALSE
BTC	0.269001	0.182581	FALSE
BTD	0.330082	0.328585	FALSE
BTF3	0.594142	0.378696	FALSE
BTF3L4	0.469994	0.418408	FALSE
BTG1	0.278989	0.422678	FALSE
BTG2	0.205655	0.516256	FALSE
BTG3	0.435926	0.0262336	FALSE
BTK	-0.0738185	0.766879	FALSE
BTLA	-0.0447999	0.734266	FALSE
BTN1A1	0.115917	0.6	FALSE
BTN2A1	0.55474	0.30784	FALSE
BTN3A1	0.226979	0.46223	FALSE
BTN3A2	0.157595	0.613414	FALSE
BTN3A3	0.209146	0.632563	FALSE
BTNL9	-0.0441369	0.345024	FALSE
BTRC	0.704171	0.0814818	TRUE
BUB1	0.345077	0.167054	TRUE
BUB1B	0.165884	0.63155	TRUE
BUB1B.PAK6	0.0932523	0.565064	FALSE
BUB3	0.56661	0.0437223	TRUE
BUD13	0.605747	0.402658	TRUE
BUD23	0.568727	0.48536	FALSE
BUD31	0.604277	0.277249	TRUE
BYSL	0.59943	0.471667	FALSE
BZW1	0.408901	0.546654	TRUE
BZW2	0.511147	0.712951	FALSE
C10orf11	0.0920878	0.492784	FALSE
C10orf12	0.41943	-0.0558473	FALSE
C10orf143	0.533582	0.408074	FALSE
C10orf2	0.304574	0.202071	FALSE
C10orf35	0.393366	0.340349	FALSE
C10orf54	0.138617	0.307515	FALSE
C10orf71	0.0459375	0.60632	FALSE
C10orf76	0.525588	0.277748	FALSE
C10orf88	0.637185	0.179225	FALSE
C10orf99	0.245291	0.476166	FALSE
C11orf16	0.42813	0.321538	FALSE
C11orf31	0.572482	0.230107	FALSE
C11orf52	0.309242	0.522524	FALSE
C11orf54	0.433032	0.641389	FALSE
C11orf57	0.478889	0.254963	FALSE
C11orf58	0.521379	0.405538	FALSE
C11orf68	0.49703	0.397185	FALSE
C11orf74	0.626546	0.696825	FALSE
C11orf84	0.358881	0.269987	FALSE
C11orf88	0.359004	0.595238	FALSE
C11orf95	0.369653	0.424316	FALSE
C11orf96	-0.00339095	0.514932	FALSE
C11orf98	0.244375	0.0877725	FALSE
C12orf10	0.48228	0.510692	FALSE
C12orf29	0.392939	0.420898	FALSE
C12orf4	0.520796	0.044326	FALSE
C12orf43	0.594271	0.343261	FALSE
C12orf45	0.387688	0.441962	FALSE
C12orf56	0.3994	0.110887	FALSE
C12orf57	0.374601	0.276102	FALSE
C12orf60	0.464337	0.75	FALSE
C12orf65	0.382445	0.24648	FALSE
C12orf66	0.465101	0.18796	TRUE
C12orf73	0.478033	0.199029	FALSE
C12orf75	0.194918	0.542021	FALSE
C14orf1	0.437324	0.399633	FALSE
C14orf119	0.527787	0.344415	FALSE
C14orf159	0.307639	0.25494	FALSE
C14orf166	0.488104	0.251827	FALSE
C14orf169	0.496658	0.350075	FALSE
C14orf2	0.447207	0.177547	FALSE
C14orf93	0.353938	-0.0116676	FALSE
C15orf38.AP3S2	0.170292	0.205507	FALSE
C15orf39	0.177578	0.278126	FALSE
C15orf40	0.479206	0.387874	FALSE
C15orf41	0.392101	0.268621	FALSE
C15orf48	0.169202	0.776393	FALSE
C15orf52	0.268146	0.620537	FALSE
C15orf57	0.630529	0.0798077	FALSE
C15orf61	0.52033	-0.8	FALSE
C15orf62	0.283439	0.2	FALSE
C16orf46	0.421046	0.357753	FALSE
C16orf54	-0.248187	0.142857	FALSE
C16orf58	0.541715	0.462064	FALSE
C16orf62	0.383461	0.567493	TRUE
C16orf70	0.651976	0.112875	FALSE
C16orf72	0.57992	0.0259217	FALSE
C16orf74	0.323872	0.332843	FALSE
C16orf86	0.310968	0.497757	FALSE
C16orf87	0.341216	0.453409	FALSE
C16orf89	0.234348	0.756339	FALSE
C16orf91	0.495068	0.231838	FALSE
C16orf96	0.381341	-0.214728	FALSE
C17orf100	0.243821	0.0879265	FALSE
C17orf47	0.462184	0.212172	FALSE
C17orf49	0.458324	0.419051	FALSE
C17orf53	0.59646	0.2	FALSE
C17orf58	0.440898	-0.211881	FALSE
C17orf62	0.488502	0.20506	FALSE
C17orf75	0.476816	0.451107	FALSE
C17orf80	0.560463	0.393021	FALSE
C17orf97	0.245606	0.610159	FALSE
C18orf21	0.619507	0.018325	FALSE
C18orf25	0.627535	0.477697	FALSE
C18orf32	0.527954	0.323512	FALSE
C18orf63	0.0509474	-0.0383725	FALSE
C18orf8	0.637724	0.448579	FALSE
C19orf12	0.534216	0.519334	FALSE
C19orf25	0.434644	0.282416	FALSE
C19orf33	0.166572	0.671217	FALSE
C19orf38	0.263495	0.3	FALSE
C19orf43	0.256632	0.282773	TRUE
C19orf44	0.360109	-0.0890756	FALSE
C19orf47	0.255292	0.257978	FALSE
C19orf52	0.475242	0.0500288	FALSE
C19orf53	0.417416	0.14634	FALSE
C19orf54	0.26524	0.145628	FALSE
C19orf66	0.312843	0.578678	FALSE
C19orf70	0.379679	0.156772	FALSE
C1D	0.380117	-0.0469366	FALSE
C1GALT1	0.457509	0.421209	FALSE
C1GALT1C1	0.370728	0.238271	FALSE
C1orf109	0.610511	0.185484	FALSE
C1orf112	0.727067	0.330719	FALSE
C1orf116	0.13058	0.768545	FALSE
C1orf122	0.416332	0.423566	FALSE
C1orf123	0.450937	0.47468	FALSE
C1orf131	0.572604	0.148866	FALSE
C1orf159	0.600237	0.0165301	FALSE
C1orf167	-0.129897	-0.220738	FALSE
C1orf174	0.601577	0.262474	FALSE
C1orf194	0.18177	0.617128	FALSE
C1orf198	0.347829	0.610042	FALSE
C1orf21	0.209543	0.49139	FALSE
C1orf210	0.277172	0.615236	FALSE
C1orf226	0.339823	0.437147	FALSE
C1orf27	0.507226	0.269411	FALSE
C1orf35	0.490768	0.533876	FALSE
C1orf43	0.660073	0.229455	FALSE
C1orf50	0.528044	0.428098	FALSE
C1orf52	0.543036	0.151494	FALSE
C1orf53	0.358794	0.618627	FALSE
C1orf56	0.208518	0.139375	FALSE
C1orf87	0.186352	0.538716	FALSE
C1QA	0.0545541	0.370477	TRUE
C1QB	0.042493	0.379208	TRUE
C1QBP	0.507191	0.478104	TRUE
C1QC	0.0181015	0.396147	TRUE
C1QL1	0.0704937	0.533333	FALSE
C1QTNF2	0.258429	0.428587	FALSE
C1QTNF3	0.163947	0.550244	FALSE
C1QTNF5	0.0443259	0.459628	FALSE
C1QTNF6	0.0896056	0.260825	FALSE
C1QTNF7	0.168016	0.416231	FALSE
C1QTNF8	-0.00621273	-0.357813	FALSE
C1QTNF9	0.244635	0.113896	FALSE
C1R	0.168728	0.517587	FALSE
C1RL	0.403537	0.290337	FALSE
C1S	0.126849	0.51436	FALSE
C2	0.124466	0.341995	FALSE
C20orf194	0.275087	0.30726	FALSE
C20orf24	0.409745	0.35545	FALSE
C20orf27	0.520252	0.506731	FALSE
C21orf2	0.318787	0.189862	FALSE
C21orf33	0.499449	0.325166	FALSE
C21orf59	0.602728	0.339118	FALSE
C21orf91	0.392916	0.15865	FALSE
C22orf29	0.365039	-0.000205787	FALSE
C22orf39	0.542305	0.0763284	FALSE
C2CD2	0.275177	0.420445	FALSE
C2CD2L	0.370258	0.448842	FALSE
C2CD3	0.49352	0.243269	FALSE
C2CD4C	-0.0425628	0.401172	FALSE
C2CD5	0.52371	0.576342	FALSE
C2orf15	-0.0486697	0.101299	FALSE
C2orf16	0.142502	0.203452	FALSE
C2orf40	-0.0751388	0.442424	FALSE
C2orf42	0.504244	-0.0410002	FALSE
C2orf47	0.594482	0.282171	FALSE
C2orf49	0.563143	0.301774	FALSE
C2orf50	-0.0418383	0.9	FALSE
C2orf54	0.240215	0.455815	FALSE
C2orf68	0.537748	0.134213	FALSE
C2orf69	0.403218	0.409185	FALSE
C2orf72	0.11528	0.284565	FALSE
C2orf76	0.214688	0.16558	FALSE
C2orf88	0.14456	0.325722	FALSE
C3	0.14369	0.277267	TRUE
C3AR1	-0.164175	-0.202607	FALSE
C3orf33	0.469953	0.312141	FALSE
C3orf38	0.544965	0.37193	FALSE
C3orf52	0.340872	0.0365734	FALSE
C3orf58	0.324932	0.529135	FALSE
C3orf67	-0.0230635	-0.302564	FALSE
C4A	0.0434757	0.289909	FALSE
C4B	0.0549025	0.326344	FALSE
C4BPA	0.0859985	0.0847796	FALSE
C4BPB	0.033129	-0.0450344	FALSE
C4orf19	0.217674	0.587491	FALSE
C4orf3	0.384305	0.0757363	FALSE
C4orf32	0.239986	0.456385	FALSE
C4orf33	0.376672	0.200973	FALSE
C4orf46	0.159894	0.4	FALSE
C4orf48	0.206438	0.0549451	FALSE
C5	0.255913	0.02328	FALSE
C5AR1	0.0779763	0.541662	FALSE
C5orf15	0.439728	0.2433	FALSE
C5orf22	0.609332	0.396779	FALSE
C5orf24	0.394662	0.393149	FALSE
C5orf30	0.310867	0.665266	FALSE
C5orf42	0.251197	0.108872	FALSE
C5orf51	0.543031	0.467746	FALSE
C6	-0.0241831	0.153913	FALSE
C6orf10	0.094917	-0.0757136	FALSE
C6orf106	0.494643	0.262206	FALSE
C6orf120	0.590211	0.271469	FALSE
C6orf132	0.27363	0.638684	FALSE
C6orf136	0.323787	0.22085	FALSE
C6orf141	0.15006	0.263817	FALSE
C6orf15	-0.171458	0.600553	FALSE
C6orf203	0.480092	0.281485	FALSE
C6orf223	0.309507	-0.25014	FALSE
C6orf47	0.544142	0.323802	FALSE
C6orf58	0.0294868	0.379569	FALSE
C6orf89	0.571649	0.194682	FALSE
C7	0.00620459	0.424694	FALSE
C7orf25	0.524568	0.398651	FALSE
C7orf26	0.548817	0.113387	FALSE
C7orf43	0.473478	0.269014	FALSE
C7orf50	0.533489	0.435878	FALSE
C7orf57	0.200041	0.607553	FALSE
C7orf73	0.333963	0.122549	FALSE
C8A	0.0630651	0.0214273	FALSE
C8B	0.0557751	0.0229303	FALSE
C8G	0.100716	-0.0680081	FALSE
C8orf33	0.623378	0.522662	FALSE
C8orf37	0.403308	0.544604	FALSE
C8orf4	0.0711948	0.4	FALSE
C8orf59	0.601758	0.196471	FALSE
C8orf76	0.66478	0.160215	FALSE
C8orf82	0.527117	0.447967	FALSE
C8orf88	0.0615885	0.595662	FALSE
C9	0.00303898	0.132407	FALSE
C9orf116	0.636725	0.781439	FALSE
C9orf142	0.403845	0.201201	FALSE
C9orf152	0.356547	0.628372	FALSE
C9orf16	0.210251	0.25155	FALSE
C9orf40	0.384601	0.337409	FALSE
C9orf64	0.490306	0.61998	FALSE
C9orf66	0.443371	0.653621	FALSE
C9orf72	0.435276	0.32586	TRUE
C9orf78	0.675254	0.46729	FALSE
C9orf84	0.381726	0.0705882	FALSE
C9orf85	0.597393	0.315254	FALSE
CA1	0.101874	0.107855	FALSE
CA12	0.257232	0.783142	FALSE
CA13	0.273348	0.687572	FALSE
CA2	0.0721777	0.477779	FALSE
CA3	0.116311	0.397323	FALSE
CA4	0.0322296	0.378247	FALSE
CA5B	0.266599	0.528258	FALSE
CA6	0.162862	-0.116711	FALSE
CA8	-0.0480564	0.680929	FALSE
CA9	0.142505	0.781801	FALSE
CAAP1	0.656498	0.195254	FALSE
CAB39	0.479904	0.624867	TRUE
CAB39L	0.348319	0.64223	FALSE
CABIN1	0.474001	0.152203	TRUE
CABLES1	0.323226	0.494164	FALSE
CABLES2	0.296974	-0.244022	FALSE
CABP7	0.176487	-0.390909	FALSE
CACFD1	0.292541	0.282108	FALSE
CACHD1	0.105972	0.381231	FALSE
CACNA1A	0.0741181	-0.167805	TRUE
CACNA1F	0.27659	-0.572727	FALSE
CACNA1H	0.18449	0.0185856	FALSE
CACNA1S	0.0211315	0.132105	FALSE
CACNA2D1	-0.0240783	0.707472	FALSE
CACNA2D2	0.0609691	0.480636	FALSE
CACNA2D3	0.0300214	-0.0347812	FALSE
CACNB1	0.279696	0.629803	FALSE
CACNB2	0.355733	0.555951	FALSE
CACNB3	0.207279	0.469194	FALSE
CACNG1	-0.0610768	0.714432	FALSE
CACNG6	0.0260454	-0.0755123	FALSE
CACTIN	0.455032	0.276371	TRUE
CACUL1	0.553569	0.499747	FALSE
CACYBP	0.412787	0.626247	TRUE
CAD	0.39189	0.48703	FALSE
CADM1	0.14514	0.69853	TRUE
CADM2	0.242063	0.428571	FALSE
CADM3	-0.13548	0.656883	FALSE
CADM4	0.175971	0.414396	FALSE
CADPS	0.0950972	0.526571	FALSE
CADPS2	0.196978	0.63422	FALSE
CAGE1	0.349404	-0.293718	FALSE
CALB1	0.274644	0.397522	FALSE
CALB2	0.155756	0.80278	FALSE
CALCA	-0.0472046	0.188185	FALSE
CALCB	-0.0703066	-0.0155242	FALSE
CALCOCO1	0.184321	0.315607	FALSE
CALCOCO2	0.397646	0.441614	FALSE
CALCRL	0.171891	0.620722	TRUE
CALD1	0.0443666	0.674812	FALSE
CALHM2	0.184474	0.251924	FALSE
CALHM5	0.190642	0.637456	FALSE
CALHM6	0.189254	0.775533	FALSE
CALM1	0.530074	0.399048	TRUE
CALM2	0.350482	0.189325	FALSE
CALM3	0.678566	0.116537	FALSE
CALML3	0.212324	0.45539	FALSE
CALML4	0.341335	0.628264	FALSE
CALML5	0.184575	0.620752	FALSE
CALR	0.27533	0.525604	TRUE
CALU	0.349395	0.591198	FALSE
CAMK1	0.163098	0.578567	FALSE
CAMK1D	0.0866061	0.74019	FALSE
CAMK2A	0.206833	0.389128	TRUE
CAMK2B	0.0473933	0.443234	FALSE
CAMK2D	0.397355	0.776158	TRUE
CAMK2G	0.480472	0.371172	FALSE
CAMK2N1	0.101207	0.334429	FALSE
CAMK4	0.147311	0.621456	FALSE
CAMKK1	0.297038	0.443531	FALSE
CAMKK2	0.570609	0.343832	FALSE
CAMKMT	0.323727	0.42896	FALSE
CAMLG	0.47572	0.276316	TRUE
CAMP	0.144909	0.0788805	FALSE
CAMSAP1	0.437884	0.473915	FALSE
CAMSAP2	0.439336	0.573464	FALSE
CAMSAP3	0.303355	0.574336	FALSE
CAND1	0.622797	0.498633	TRUE
CAND2	0.20658	0.549881	FALSE
CANT1	0.498927	0.591692	FALSE
CANX	0.527609	0.452805	TRUE
CAP1	0.467368	0.56639	TRUE
CAP2	0.249419	0.650129	FALSE
CAPG	0.204061	0.736366	TRUE
CAPN1	0.404297	0.416357	TRUE
CAPN10	0.446211	0.375494	FALSE
CAPN13	0.0753532	0.802032	FALSE
CAPN14	0.0104999	0.297545	FALSE
CAPN15	0.29745	0.251996	FALSE
CAPN2	0.119618	0.642478	FALSE
CAPN3	0.232834	0.453553	FALSE
CAPN5	0.263448	0.680405	FALSE
CAPN6	-0.0306267	0.657614	FALSE
CAPN7	0.432421	0.413832	FALSE
CAPN8	0.204596	0.598429	FALSE
CAPN9	0.316929	0.569754	FALSE
CAPNS1	0.447766	0.280989	TRUE
CAPNS2	0.255036	0.3231	FALSE
CAPRIN1	0.561597	0.545678	TRUE
CAPRIN2	0.271539	-0.142857	FALSE
CAPS	0.161777	0.656951	FALSE
CAPSL	0.0155105	0.706333	FALSE
CAPZA1	0.480188	0.34105	TRUE
CAPZA2	0.415675	0.272051	FALSE
CAPZB	0.432545	0.352708	TRUE
CARD10	0.191604	0.566387	FALSE
CARD11	-0.0113928	0.706623	TRUE
CARD14	0.204431	0.375259	FALSE
CARD16	0.125834	0.608578	FALSE
CARD17	0.488292	0.836223	FALSE
CARD18	0.306112	0.855532	FALSE
CARD19	0.435231	0.260901	FALSE
CARD6	0.0408007	0.56726	FALSE
CARD8	0.336688	0.433367	TRUE
CARD9	0.0893036	0.648039	FALSE
CARHSP1	0.338873	0.577415	FALSE
CARM1	0.383833	0.545247	TRUE
CARMIL1	0.221124	0.567986	FALSE
CARMIL2	-0.226951	0.529089	FALSE
CARNMT1	0.61934	0.69059	FALSE
CARNS1	0.30351	0.28702	FALSE
CARS	0.410089	0.640453	FALSE
CARS2	0.587743	0.585949	FALSE
CARTPT	0.218719	0.402752	FALSE
CASC1	0.112902	0.119236	FALSE
CASC3	0.468836	0.231464	TRUE
CASC4	0.469629	0.547264	FALSE
CASD1	0.290277	0.251169	FALSE
CASK	0.404225	0.607136	TRUE
CASKIN1	0.190749	-0.0384615	FALSE
CASKIN2	0.287226	0.33166	FALSE
CASP1	0.188714	0.770726	TRUE
CASP10	0.303655	0.753206	TRUE
CASP12	0.078106	0.0266937	FALSE
CASP14	0.0595133	0.426004	FALSE
CASP2	0.561718	0.524444	TRUE
CASP3	0.437312	0.611522	FALSE
CASP4	0.253559	0.652685	FALSE
CASP5	0.120743	0.0859139	TRUE
CASP6	0.42683	0.678137	FALSE
CASP7	0.383894	0.689472	FALSE
CASP8	0.420641	0.634164	TRUE
CASP8AP2	0.585885	0.0608505	FALSE
CASP9	0.441398	0.437418	TRUE
CASQ1	0.00680416	0.277972	FALSE
CASQ2	0.0504832	0.446531	FALSE
CASR	0.256618	0.0267798	FALSE
CASS4	-0.176296	0.428455	FALSE
CAST	0.55335	0.564473	FALSE
CASTOR1	0.212872	0.55569	FALSE
CASTOR2	0.255365	0.40968	FALSE
CASZ1	0.209812	0.450008	FALSE
CAT	0.399406	0.298529	FALSE
CAV1	0.0751675	0.570491	TRUE
CAV2	0.195402	0.373826	FALSE
CAV3	0.124564	0.452588	TRUE
CAVIN1	0.301447	0.74025	FALSE
CAVIN2	-0.0280213	0.813836	FALSE
CAVIN3	-0.00608408	0.6319	FALSE
CBFA2T2	0.373288	0.384724	FALSE
CBFA2T3	0.00940486	0.244275	FALSE
CBFB	0.546298	0.410117	TRUE
CBL	0.306829	0.407051	TRUE
CBLB	0.276436	0.414214	TRUE
CBLC	0.242463	0.556134	FALSE
CBLL1	0.617874	0.130339	FALSE
CBLN1	0.319635	0.603571	FALSE
CBR1	0.343126	0.649363	FALSE
CBR3	0.250616	0.677573	FALSE
CBR4	0.5886	0.373821	FALSE
CBS	0.215973	0.643255	FALSE
CBSL	0.00705128	0.181792	FALSE
CBWD1	0.490932	0.372476	FALSE
CBWD2	0.404287	0.326183	FALSE
CBWD6	0.692221	0.657143	FALSE
CBX1	0.445733	0.337127	FALSE
CBX2	0.199679	0.641037	TRUE
CBX3	0.537784	0.281867	TRUE
CBX4	0.184874	0.400813	TRUE
CBX5	0.3165	0.579656	TRUE
CBX6	0.310276	0.3533	FALSE
CBX7	0.267103	0.511708	FALSE
CBX8	0.299003	0.425656	TRUE
CBY1	0.525607	0.313594	FALSE
CC2D1A	0.38545	0.457706	FALSE
CC2D1B	0.437604	0.499641	FALSE
CC2D2A	0.374612	0.202331	TRUE
CCAR1	0.488606	0.377202	TRUE
CCAR2	0.757169	0.66102	TRUE
CCBE1	0.288875	0.505984	FALSE
CCDC102A	0.339641	0.462168	FALSE
CCDC102B	0.162841	0.261569	FALSE
CCDC106	0.240785	0.26196	FALSE
CCDC110	0.312168	0.0474061	FALSE
CCDC114	-0.047799	0.591473	FALSE
CCDC115	0.477888	0.0445095	FALSE
CCDC117	0.513497	0.471321	FALSE
CCDC12	0.466973	0.295539	FALSE
CCDC120	0.20832	0.32334	FALSE
CCDC121	0.0430365	0.107143	FALSE
CCDC124	0.380906	0.392278	FALSE
CCDC125	0.229354	0.418976	FALSE
CCDC126	0.429629	0.457608	FALSE
CCDC127	0.558256	0.481017	FALSE
CCDC13	0.195779	0.32599	FALSE
CCDC130	0.482724	0.160745	FALSE
CCDC134	0.465115	0.567066	FALSE
CCDC137	0.592559	0.291883	FALSE
CCDC138	0.395571	0.225798	FALSE
CCDC14	0.412729	0.303245	FALSE
CCDC141	-0.0480529	-0.00568782	FALSE
CCDC144A	0.228466	0.187117	FALSE
CCDC146	0.218576	0.107787	FALSE
CCDC149	0.436889	0.419184	FALSE
CCDC150	0.403292	-0.0916496	FALSE
CCDC151	-0.0281196	0.421857	FALSE
CCDC158	0.0105562	0.103671	FALSE
CCDC167	0.331632	0.144193	FALSE
CCDC168	0.129841	-0.00865956	FALSE
CCDC170	0.0972987	0.538922	FALSE
CCDC171	0.200193	0.114027	FALSE
CCDC173	0.16886	0.31731	FALSE
CCDC174	0.513392	0.331145	FALSE
CCDC175	-0.0619419	-0.336798	FALSE
CCDC177	0.0953176	-0.0285714	FALSE
CCDC178	0.184385	0.148421	FALSE
CCDC179	-0.0432812	-0.113718	FALSE
CCDC18	0.503021	0.0871102	FALSE
CCDC180	0.0985727	-0.0382239	FALSE
CCDC181	0.179557	0.0932386	FALSE
CCDC182	-0.129883	0.0797296	FALSE
CCDC186	0.535143	0.764063	FALSE
CCDC187	0.260411	0.566827	FALSE
CCDC191	0.51352	0.231918	FALSE
CCDC22	0.437916	0.133165	TRUE
CCDC25	0.714386	0.583393	FALSE
CCDC28A	0.438862	0.443391	FALSE
CCDC28B	0.222441	0.584461	FALSE
CCDC32	0.58768	0.64271	FALSE
CCDC34	0.269041	-0.190643	FALSE
CCDC39	0.0669741	0.395763	FALSE
CCDC40	0.20973	0.266304	FALSE
CCDC43	0.550068	0.418084	FALSE
CCDC47	0.613523	0.378594	FALSE
CCDC50	0.279788	0.558359	FALSE
CCDC51	0.294741	0.360671	FALSE
CCDC53	0.474148	0.386103	TRUE
CCDC57	0.347809	0.02404	FALSE
CCDC58	0.535754	0.396976	FALSE
CCDC59	0.541766	0.255655	FALSE
CCDC6	0.434384	0.676385	FALSE
CCDC61	0.331427	0.247417	FALSE
CCDC65	0.357675	0.257159	FALSE
CCDC68	0.394044	0.288386	FALSE
CCDC69	0.136451	0.311763	FALSE
CCDC7	0.226689	0.0146301	FALSE
CCDC71	0.56776	-0.0696076	FALSE
CCDC71L	0.348058	0.453887	FALSE
CCDC74A	0.0644795	-0.316228	FALSE
CCDC77	0.482023	0.200089	FALSE
CCDC78	0.224181	0.694938	FALSE
CCDC8	0.109204	0.76517	TRUE
CCDC80	0.0304731	0.708431	FALSE
CCDC81	0.304245	0.398601	FALSE
CCDC82	0.371437	0.210058	FALSE
CCDC84	0.550051	0.270062	FALSE
CCDC85A	0.076274	0.412425	FALSE
CCDC85B	0.252256	0.332917	TRUE
CCDC85C	0.491035	0.491238	FALSE
CCDC86	0.426679	0.392902	FALSE
CCDC88A	0.293443	0.655799	FALSE
CCDC88B	0.172398	0.483804	FALSE
CCDC88C	0.2801	0.54369	FALSE
CCDC9	0.331933	0.316705	FALSE
CCDC90B	0.438457	0.287293	FALSE
CCDC91	0.485584	0.572125	FALSE
CCDC92	0.294151	0.383622	TRUE
CCDC93	0.436761	0.138221	TRUE
CCDC94	0.42415	0.417662	FALSE
CCDC96	0.439613	0.2	FALSE
CCDC97	0.452955	0.319095	FALSE
CCDC9B	0.192897	0.71302	FALSE
CCHCR1	0.502596	0.159492	FALSE
CCL14	0.0432828	0.45853	FALSE
CCL15	0.249875	0.498496	FALSE
CCL16	0.0267584	0.00857039	FALSE
CCL17	0.0443642	-0.486506	FALSE
CCL18	0.00570281	0.428	FALSE
CCL19	-0.0398828	-0.176623	FALSE
CCL2	0.151068	0.2	FALSE
CCL20	0.266292	0.554344	FALSE
CCL21	0.0843511	0.68562	FALSE
CCL24	-0.0573485	0.650965	FALSE
CCL28	0.0952448	0.127192	FALSE
CCL5	-0.0388003	0.525571	FALSE
CCM2	0.464138	0.431049	FALSE
CCNA2	0.10904	0.60182	TRUE
CCNB1	0.136552	0.64263	TRUE
CCNB2	0.171513	0.529754	TRUE
CCNC	0.621626	0.103879	TRUE
CCND1	0.398916	0.698055	TRUE
CCND2	0.0419343	0.412574	TRUE
CCND3	0.333842	0.21999	TRUE
CCNDBP1	0.490693	0.122504	FALSE
CCNE1	0.522552	0.534683	TRUE
CCNE2	0.489981	0.150798	FALSE
CCNH	0.607808	0.0626076	TRUE
CCNK	0.476413	0.147055	TRUE
CCNL1	0.474486	0.212351	FALSE
CCNL2	0.501754	0.106712	FALSE
CCNQ	0.149268	-0.255846	FALSE
CCNT1	0.601825	0.408081	TRUE
CCNT2	0.560551	0.289583	TRUE
CCNY	0.551532	0.289746	FALSE
CCNYL1	0.341202	0.33371	FALSE
CCP110	0.463138	0.288282	TRUE
CCPG1	0.247933	0.346988	FALSE
CCR1	0.451121	0.588694	FALSE
CCR6	0.0358036	0.709592	FALSE
CCRL2	0.268245	0.573488	FALSE
CCS	0.451338	0.346919	FALSE
CCSAP	0.479635	0.0227079	FALSE
CCSER1	0.343924	0.578211	FALSE
CCSER2	0.440947	0.407095	FALSE
CCT2	0.481189	0.236629	TRUE
CCT3	0.484148	0.269423	TRUE
CCT4	0.52171	0.268195	TRUE
CCT5	0.481193	0.145546	TRUE
CCT6A	0.492154	0.238737	TRUE
CCT6B	0.141113	0.115792	FALSE
CCT7	0.481373	0.143018	TRUE
CCT8	0.566862	0.388744	TRUE
CCZ1	0.382227	0.238978	FALSE
CD101	0.212233	0.425489	FALSE
CD109	0.190815	0.699184	FALSE
CD14	0.0609815	0.697195	FALSE
CD151	0.4029	0.434833	TRUE
CD163	-0.0380212	0.647143	FALSE
CD163L1	-0.0260549	0.573863	FALSE
CD164	0.501559	0.077784	FALSE
CD177	0.124996	0.41353	FALSE
CD180	0.0573274	0.409977	FALSE
CD19	0.0123455	0.811538	TRUE
CD1A	-0.261853	0.798081	FALSE
CD1C	-0.442561	0.2	FALSE
CD2	0.0877949	0.70855	FALSE
CD200	0.0257333	0.499262	FALSE
CD200R1	0.124267	0.474476	FALSE
CD207	-0.117676	0.741116	FALSE
CD209	0.0915478	0.655092	FALSE
CD22	-0.100572	0.719608	FALSE
CD247	-0.167183	0.638598	FALSE
CD248	0.0114052	0.63619	FALSE
CD27	0.0413426	0.454473	FALSE
CD274	0.372379	0.670003	FALSE
CD276	0.283272	0.532178	FALSE
CD28	0.0418918	0.573945	TRUE
CD2AP	0.470127	0.698644	TRUE
CD2BP2	0.507818	0.289402	TRUE
CD300A	-0.00245197	0.612605	FALSE
CD300LF	0.0324335	0.739245	FALSE
CD300LG	0.0366536	0.453046	FALSE
CD320	0.233199	0.448405	FALSE
CD33	0.0548588	0.522686	FALSE
CD34	-0.0825966	0.54991	FALSE
CD36	-0.0534407	0.694743	FALSE
CD37	0.025209	0.475625	FALSE
CD38	0.112088	0.702178	FALSE
CD3D	-0.0507457	0.54753	FALSE
CD3E	-0.0239853	0.720051	FALSE
CD3EAP	0.373541	0.540371	TRUE
CD3G	-0.0404979	0.678222	FALSE
CD4	-0.0635065	0.661469	FALSE
CD40	0.13119	0.703763	FALSE
CD44	0.155265	0.650491	TRUE
CD46	0.509545	0.505202	FALSE
CD47	0.356093	0.536589	TRUE
CD48	-0.176445	0.692176	FALSE
CD5	-0.0539378	0.598982	FALSE
CD53	0.121749	0.619092	TRUE
CD55	0.0536957	0.604805	FALSE
CD58	0.233425	0.482831	FALSE
CD59	0.304041	0.459361	FALSE
CD5L	-0.0900001	-0.0666776	FALSE
CD6	-0.0113144	0.530967	FALSE
CD63	0.366941	0.393235	TRUE
CD68	0.135325	0.510043	FALSE
CD69	0.0981246	0.654251	FALSE
CD7	0.156243	0.496137	FALSE
CD70	-0.0118657	0.813293	FALSE
CD72	0.0704396	0.424708	FALSE
CD74	0.285285	0.683464	FALSE
CD79A	0.19074	0.651305	FALSE
CD79B	-0.293469	0.785714	FALSE
CD81	0.341952	0.394071	TRUE
CD82	0.226473	0.640507	FALSE
CD83	0.0586042	0.52718	FALSE
CD84	-0.211059	0.490819	FALSE
CD86	0.0437831	0.306364	FALSE
CD8A	-0.0426446	0.740488	TRUE
CD8B	0.035436	0.447396	FALSE
CD9	0.421965	0.594437	TRUE
CD93	-0.112079	0.568495	FALSE
CD99	0.311492	0.554397	FALSE
CD99L2	0.15671	0.50281	FALSE
[truncated: 11,821 more rows]

## Sheet: S2B.COAD.corr.table
S2B. Spearman's DNA-RNA Corr and RNA-Pro Corr for each gene in COAD
gene	DNA-RNA Corr	RNA-Pro Corr	CORUM complex
A1CF	0.127002	0.583661	FALSE
A2M	0.101639	-0.00112343	TRUE
AAAS	0.525957	0.126613	FALSE
AACS	0.270171	0.549662	FALSE
AAGAB	0.654579	0.461201	FALSE
AAK1	0.126089	0.260335	FALSE
AAMDC	-0.1031	0.362569	FALSE
AAMP	0.51327	0.442865	FALSE
AAR2	0.796528	0.557006	FALSE
AARS	0.20073	0.482583	FALSE
AARS2	0.539866	0.609322	FALSE
AASDHPPT	0.36364	0.482453	FALSE
AASS	-0.252069	0.504923	FALSE
AATF	0.722454	0.282013	FALSE
ABAT	0.15018	0.820101	FALSE
ABCB1	0.108593	0.757541	TRUE
ABCB10	0.511277	0.281771	FALSE
ABCB6	0.040411	0.0197499	FALSE
ABCB7	0.44696	0.251998	FALSE
ABCB8	0.346148	0.346377	FALSE
ABCC1	0.313658	0.29519	FALSE
ABCC3	0.254872	0.545779	FALSE
ABCC4	-0.0281811	0.533687	FALSE
ABCD1	0.137228	0.200336	FALSE
ABCD3	0.686161	0.484331	FALSE
ABCE1	0.544314	0.386227	FALSE
ABCF1	0.466552	0.435591	FALSE
ABCF2	0.502197	0.582224	FALSE
ABCF3	0.417926	0.151907	FALSE
ABHD10	0.326337	0.184818	FALSE
ABHD11	0.46704	0.400161	FALSE
ABHD12	0.842993	0.651743	FALSE
ABHD14B	0.162037	0.550634	FALSE
ABHD16A	0.6872	0.466455	FALSE
ABHD17A	0.124103	0	FALSE
ABHD17B	0.593851	-0.5	FALSE
ABHD17C	0.546181	0.0946001	FALSE
ABHD3	0.521322	0.428571	FALSE
ABHD6	0.206231	0.458197	FALSE
ABI1	0.480376	0.249306	TRUE
ABI2	0.548063	0.213921	FALSE
ABI3	-0.0655358	0.419969	TRUE
ABI3BP	-0.045895	0.386724	FALSE
ABL1	0.488946	0.0543858	TRUE
ABLIM1	0.498826	0.349972	FALSE
ABLIM2	0.401615	0.340351	FALSE
ABO	0.272461	0.341415	FALSE
ABR	0.356824	0.407324	FALSE
ABRACL	0.334711	0.499095	FALSE
ABT1	0.333402	0.324615	FALSE
ACAA1	0.310328	0.476727	FALSE
ACAA2	0.547894	0.675022	FALSE
ACACA	0.336561	0.496232	FALSE
ACAD10	0.149745	0.25432	FALSE
ACAD8	0.43112	0.425341	TRUE
ACAD9	0.413483	0.381773	FALSE
ACADM	0.395505	0.493968	FALSE
ACADS	0.135006	0.474815	FALSE
ACADSB	0.561421	0.766133	FALSE
ACADVL	0.505513	0.602358	FALSE
ACAP1	0.17184	0.571758	TRUE
ACAP2	0.108459	0.154731	FALSE
ACAT1	-0.0217014	0.399611	FALSE
ACAT2	0.0713285	0.353178	FALSE
ACBD3	0.436516	0.475687	FALSE
ACBD5	0.300292	0.65427	FALSE
ACBD6	0.396331	0.298424	FALSE
ACE	0.214149	0.388901	FALSE
ACE2	0.20406	0.73472	FALSE
ACIN1	0.446037	0.0341642	TRUE
ACLY	0.297349	0.436541	FALSE
ACO1	0.344331	0.466112	FALSE
ACO2	0.497504	0.281504	FALSE
ACOT1	0.0743197	0.226988	FALSE
ACOT11	0.4599	0.613614	FALSE
ACOT13	0.186593	0.435558	FALSE
ACOT7	0.316826	0.407995	FALSE
ACOT8	0.513688	0.451077	FALSE
ACOT9	0.532776	0.464109	FALSE
ACOX1	0.536751	0.488728	FALSE
ACOX2	0.384595	0.666208	FALSE
ACOX3	0.493428	0.582455	FALSE
ACP1	0.414396	0.196482	FALSE
ACP2	0.326877	0.547853	FALSE
ACP5	-0.201312	0.319679	FALSE
ACP6	0.10416	0.654581	FALSE
ACPP	0.00830972	0.802892	FALSE
ACSF2	0.169152	0.826512	FALSE
ACSF3	0.258049	0.467014	FALSE
ACSL1	0.0137832	0.720581	FALSE
ACSL3	0.384853	0.751918	FALSE
ACSL4	0.316599	0.593499	FALSE
ACSL5	0.497257	0.749918	FALSE
ACSL6	0.366586	0.5	FALSE
ACSM3	0.0175929	0.756256	FALSE
ACSS1	0.672768	0.821843	FALSE
ACSS2	0.412747	0.611048	FALSE
ACTA2	0.184855	0.342122	TRUE
ACTB	0.0367376	-0.0756522	TRUE
ACTG1	0.371124	0.00702566	TRUE
ACTG2	-0.0949435	0.57879	TRUE
ACTL6A	0.524966	0.281544	TRUE
ACTN1	0.32456	0.200862	TRUE
ACTN4	0.251696	0.291926	TRUE
ACTR10	0.352055	0.262011	FALSE
ACTR1A	0.592958	0.38079	FALSE
ACTR1B	0.32156	0.309179	FALSE
ACTR2	0.417653	0.131961	TRUE
ACTR3	0.303289	0.106389	TRUE
ACTR3B	0.475587	-0.0676471	FALSE
ACTR5	0.763053	0.17295	TRUE
ACTR6	0.313902	-0.0290032	TRUE
ACTR8	0.354507	0.0557185	TRUE
ACY1	0.234872	0.52894	FALSE
ACYP1	0.228971	0.289434	FALSE
ACYP2	0.177483	0.342067	FALSE
ADA	0.265465	0.565756	TRUE
ADAM10	0.620573	0.638939	FALSE
ADAM15	0.376153	0.258724	TRUE
ADAM17	0.577478	0.150078	FALSE
ADAM9	0.592439	0.416221	TRUE
ADAMDEC1	0.231955	0.334533	FALSE
ADAP1	0.244597	0.352356	FALSE
ADAR	0.428516	0.555006	TRUE
ADCK5	0.624526	0.674599	FALSE
ADCY6	0.197124	0.284937	FALSE
ADD1	0.275539	0.246728	FALSE
ADD3	0.352399	0.468184	FALSE
ADH1B	-0.0187343	0.620392	FALSE
ADH1C	0.053171	0.618913	FALSE
ADH5	0.431658	0.33525	FALSE
ADH6	0.198022	0.691697	FALSE
ADI1	0.471038	0.316362	FALSE
ADIRF	0.136879	0.453888	FALSE
ADK	0.121826	0.324779	FALSE
ADM2	0.11647	-0.6	FALSE
ADNP	0.720181	0.772001	FALSE
ADO	0.723294	0.397069	FALSE
ADPGK	0.747842	0.377885	FALSE
ADPRH	0.0363148	0.51831	FALSE
ADPRHL2	0.176976	0.126215	FALSE
ADRM1	0.521096	0.281158	FALSE
ADSL	0.522894	0.592855	FALSE
ADSS	0.386942	0.128188	FALSE
ADTRP	-0.202674	0.35536	FALSE
AEBP1	-0.151965	0.62738	FALSE
AES	0.31966	0.186884	FALSE
AFAP1	0.0854916	0.181296	FALSE
AFAP1L2	0.388506	0.519388	FALSE
AFF4	0.237538	0.103659	TRUE
AFG3L2	0.684007	0.579611	TRUE
AFMID	0.556775	0.535714	FALSE
AFTPH	0.431092	0.174395	FALSE
AGAP1	0.2013	0.0396546	FALSE
AGAP3	0.626267	-0.0288618	FALSE
AGFG1	0.524753	0.271648	FALSE
AGFG2	0.161051	0.680718	FALSE
AGK	0.539285	0.307879	FALSE
AGL	0.436405	0.401093	FALSE
AGMAT	0.31373	0.341443	FALSE
AGO1	0.374029	0.372442	FALSE
AGO2	0.488899	0.500574	TRUE
AGO3	0.165333	0.0993434	FALSE
AGO4	0.240449	-0.4	TRUE
AGPAT1	0.31507	0.13555	FALSE
AGPAT2	0.35399	0.524828	FALSE
AGPAT3	0.527909	0.532726	FALSE
AGPAT5	0.756341	0.548994	FALSE
AGPS	0.202264	0.263945	TRUE
AGR2	5.24921e-05	0.764517	FALSE
AGR3	-0.00757655	0.809709	FALSE
AGRN	-0.0332179	0.22955	FALSE
AGT	0.293805	-0.201028	TRUE
AGTRAP	0.48644	0.456158	FALSE
AHCTF1	0.521499	0.515507	FALSE
AHCY	0.599534	0.321367	FALSE
AHCYL1	0.574598	-0.00332009	FALSE
AHCYL2	0.051479	0.745789	FALSE
AHNAK	0.0454439	0.270631	TRUE
AHNAK2	0.209648	0.443224	FALSE
AHR	0.0585991	0.444935	TRUE
AHSA1	0.601	0.827786	FALSE
AIDA	0.362638	0.291305	FALSE
AIF1	-0.107447	0.313871	FALSE
AIF1L	-0.0110235	0.444772	FALSE
AIFM1	0.390345	0.448392	TRUE
AIFM2	0.382898	0.476677	FALSE
AIG1	0.397887	0.409646	FALSE
AIM1	0.349662	0.758447	FALSE
AIMP1	0.492471	0.395932	TRUE
AIMP2	0.272751	0.251754	TRUE
AIP	0.332082	0.470085	FALSE
AK1	0.236196	0.789034	FALSE
AK2	0.458808	0.101865	FALSE
AK3	0.536483	0.622065	FALSE
AK4	0.022466	0.721843	FALSE
AK6	0.15428	0.457933	FALSE
AKAP1	0.6237	0.535011	TRUE
AKAP10	0.76507	-0.196147	FALSE
AKAP12	0.199915	0.628584	FALSE
AKAP13	0.230921	0.136738	TRUE
AKAP17A	0.338156	0.222046	FALSE
AKAP5	0.161975	0.442334	TRUE
AKAP7	-0.0687887	0.4	FALSE
AKAP8	0.415691	0.145018	FALSE
AKAP8L	0.459814	0.521112	TRUE
AKAP9	0.415615	0.399029	TRUE
AKR1A1	0.254762	0.225222	FALSE
AKR1B1	-0.193365	0.389416	FALSE
AKR1B10	0.133801	0.66966	FALSE
AKR1C1	0.403233	0.355354	FALSE
AKR1C2	0.247326	0.409824	FALSE
AKR1C3	0.194921	0.714487	FALSE
AKR7A2	0.549328	0.561605	FALSE
AKR7A3	0.334701	0.707216	FALSE
AKT1	0.646748	0.383393	TRUE
AKT1S1	0.159397	0.0427957	FALSE
AKT2	0.27371	0.218118	TRUE
AKT3	-0.120505	0.757143	FALSE
AKTIP	0.230052	0.114334	TRUE
ALAD	0.526703	0.415172	FALSE
ALAS1	0.414932	0.116484	FALSE
ALCAM	0.0213599	0.853533	FALSE
ALDH16A1	0.263921	0.369648	FALSE
ALDH18A1	0.683178	0.728678	FALSE
ALDH1A1	0.100223	0.603848	FALSE
ALDH1A3	-0.00555725	0.497372	FALSE
ALDH1B1	0.298155	0.642253	FALSE
ALDH1L1	0.181281	0.569953	FALSE
ALDH1L2	0.202888	0.61074	FALSE
ALDH2	0.145752	0.542296	FALSE
ALDH3A1	0.247243	0.665934	FALSE
ALDH3A2	0.618195	0.716903	FALSE
ALDH3B1	-0.0262972	0.150872	FALSE
ALDH4A1	0.400501	0.772582	FALSE
ALDH5A1	0.613148	0.759851	FALSE
ALDH6A1	0.294934	0.665015	FALSE
ALDH7A1	0.5007	0.619425	FALSE
ALDH9A1	0.494326	0.363604	FALSE
ALDOA	0.173969	0.553823	FALSE
ALDOB	0.0522103	0.62763	FALSE
ALDOC	0.550868	0.62269	FALSE
ALG1	0.265774	0.265351	FALSE
ALG11	0.436815	0.256605	FALSE
ALG12	0.473606	-0.00999459	FALSE
ALG13	0.371495	0.21808	FALSE
ALG14	0.506937	0.391119	FALSE
ALG2	0.463388	0.149119	FALSE
ALG5	0.391195	0.442123	FALSE
ALG6	0.425799	0.431958	FALSE
ALG8	0.0895386	0.342399	FALSE
ALG9	0.437754	0.205574	FALSE
ALKBH4	0.452262	-0.333333	FALSE
ALKBH5	0.640585	0.178931	FALSE
ALKBH7	0.0117223	0.0920644	FALSE
ALOX5	0.0314455	0.742264	FALSE
ALOX5AP	0.0726356	0.475187	FALSE
ALPL	-0.131513	0.588221	FALSE
ALYREF	0.482828	0.397492	TRUE
AMACR	-0.00584595	0.744664	FALSE
AMDHD2	0.411416	0.295706	FALSE
AMFR	0.60077	0.394608	TRUE
AMPD2	0.193184	0.298372	FALSE
AMPD3	0.380667	0.454217	FALSE
AMT	-0.035524	0.79966	FALSE
AMY2B	-0.0235222	0.2	FALSE
ANAPC1	0.344235	-0.00637246	TRUE
ANAPC10	0.566079	-0.146151	TRUE
ANAPC13	0.416565	-0.5	FALSE
ANAPC16	0.189931	-0.118303	FALSE
ANAPC2	0.519753	0.514909	TRUE
ANAPC4	0.458437	0.00864656	TRUE
ANAPC5	0.236595	-0.0130194	TRUE
ANAPC7	0.332999	0.0998851	TRUE
ANG	0.242073	-0.167393	TRUE
ANGEL2	0.508241	0.392157	FALSE
ANGPTL2	-0.0434324	0.476366	FALSE
ANK2	-0.394993	0.465545	FALSE
ANK3	0.197479	0.65252	TRUE
ANKFY1	0.323593	0.347855	FALSE
ANKHD1	0.514636	0.120813	FALSE
ANKLE2	0.491426	0.411701	FALSE
ANKMY2	0.471558	0.613646	FALSE
ANKRD10	0.614959	0.688696	FALSE
ANKRD13A	0.0330875	0.40215	FALSE
ANKRD17	0.112261	0.0494531	FALSE
ANKRD22	0.237486	0.684658	FALSE
ANKRD27	0.318437	0.521353	FALSE
ANKRD28	0.382766	0.214794	TRUE
ANKRD44	0.000837406	0.282995	FALSE
ANKRD54	0.291953	0.447495	FALSE
ANKS1A	0.565021	0.378829	FALSE
ANKS4B	0.230508	0.471261	FALSE
ANKZF1	0.374905	-0.101366	FALSE
ANLN	0.0570734	0.494339	FALSE
ANO1	0.0837476	0.702943	FALSE
ANO10	0.28713	0.580274	FALSE
ANO6	0.320731	0.44045	FALSE
ANP32A	0.651666	0.310073	TRUE
ANP32B	0.610725	0.475687	TRUE
ANP32E	0.138339	0.438805	FALSE
ANPEP	0.0831906	0.721561	FALSE
ANTXR1	-0.309079	0.508605	FALSE
ANTXR2	0.191005	0.426818	FALSE
ANXA1	0.109057	0.410966	FALSE
ANXA11	0.47385	0.46662	FALSE
ANXA13	0.341026	0.763779	FALSE
ANXA2	0.590733	0.651945	TRUE
ANXA3	0.205094	0.158737	FALSE
ANXA4	0.389383	0.445041	FALSE
ANXA5	-0.00977803	0.521756	FALSE
ANXA6	0.0571553	0.479862	TRUE
ANXA7	0.28613	0.289841	TRUE
AOC1	0.230664	0.621142	FALSE
AOC3	-0.0928791	0.502888	FALSE
AOX1	-0.0540218	0.335843	FALSE
AP1B1	0.222492	0.354997	TRUE
AP1G1	0.293436	0.47378	TRUE
AP1G2	0.664805	0.347806	TRUE
AP1M1	0.132691	0.381974	TRUE
AP1M2	0.324904	0.321604	TRUE
AP1S1	0.271493	0.154798	TRUE
AP1S2	0.219877	0.248623	TRUE
AP1S3	0.190937	0.70098	TRUE
AP2A1	0.2793	0.268522	TRUE
AP2A2	0.177451	0.337352	FALSE
AP2B1	0.458039	0.233863	FALSE
AP2M1	0.334006	0.0095575	FALSE
AP2S1	0.138643	0.115312	FALSE
AP3B1	0.741619	0.665292	TRUE
AP3D1	0.220901	0.270733	TRUE
AP3M1	0.498083	0.21545	TRUE
AP3M2	0.581838	0.3773	TRUE
AP3S1	0.725697	0.429276	TRUE
AP4M1	0.552452	0.218182	TRUE
AP4S1	0.658001	0.678922	TRUE
AP5B1	0.375165	0.107596	TRUE
AP5M1	0.487597	0.0197802	TRUE
AP5S1	0.805003	-0.0632357	TRUE
AP5Z1	0.53461	0.0123177	TRUE
APAF1	0.298566	0.42502	TRUE
APBB1	-0.172455	0.714286	TRUE
APBB1IP	0.141672	0.317067	TRUE
APBB2	0.0430032	0.600863	FALSE
APCDD1	-0.0451519	1	FALSE
APEH	0.240836	0.460625	FALSE
APEX1	0.664572	0.56578	TRUE
APH1A	0.0664626	-0.480702	TRUE
API5	0.548939	0.315763	TRUE
APIP	0.155157	0.0882491	FALSE
APLP2	0.465789	0.385778	FALSE
APMAP	0.793331	0.663252	FALSE
APOBEC3C	-0.00121725	0.162757	FALSE
APOBEC3F	-0.049448	0.284776	FALSE
APOBEC3G	-0.129021	0.36526	FALSE
APOBR	-0.0292958	0.487516	FALSE
APOC1	-0.0250345	0.129447	FALSE
APOC2	0.0647968	0.2093	FALSE
APOD	-0.199676	0.406117	FALSE
APOE	-0.0687901	0.585573	FALSE
APOL1	0.11525	0.143464	TRUE
APOL2	0.0799741	0.538221	FALSE
APOL3	-0.103438	0.278524	FALSE
APOM	0.175025	0.138813	FALSE
APOO	0.329069	0.101568	TRUE
APOOL	0.399008	0.328144	TRUE
APP	0.344024	0.403686	TRUE
APPL1	0.299742	0.448435	TRUE
APPL2	0.330454	0.476119	FALSE
APRT	0.341459	0.157988	FALSE
APTX	0.405865	0.149727	FALSE
AQP1	0.217868	0.439652	TRUE
AQP8	-0.0157602	0.438941	FALSE
AQR	0.725413	0.13892	TRUE
ARAF	0.434919	0.273391	TRUE
ARAP1	0.378631	0.275627	FALSE
ARCN1	0.497869	0.37874	FALSE
AREG	0.271935	0.611159	FALSE
ARF1	0.627928	0.02175	TRUE
ARF3	0.240149	-0.0939719	FALSE
ARF4	0.0611054	0.353711	FALSE
ARF5	0.669702	0.493129	FALSE
ARF6	0.802639	0.666348	FALSE
ARFGAP1	0.839731	0.364415	FALSE
ARFGAP2	0.442098	0.353578	FALSE
ARFGAP3	0.416918	0.679198	FALSE
ARFGEF1	0.823233	0.754917	FALSE
ARFGEF2	0.709207	0.60493	FALSE
ARFIP1	0.451106	0.435746	FALSE
ARFIP2	0.37231	0.379599	TRUE
ARFRP1	0.801718	0.46184	FALSE
ARGLU1	0.732067	0.0759738	FALSE
ARHGAP1	0.277244	0.273951	FALSE
ARHGAP10	-0.188622	0.409766	TRUE
ARHGAP12	0.343458	0.489892	FALSE
ARHGAP15	0.0682424	0.399741	FALSE
ARHGAP17	0.396069	0.152972	TRUE
ARHGAP18	0.0939246	0.676655	FALSE
ARHGAP21	0.372589	0.0141121	FALSE
ARHGAP25	-0.235432	0.650077	FALSE
ARHGAP26	0.360751	0.465712	FALSE
ARHGAP27	0.510902	0.486791	FALSE
ARHGAP30	-0.0417763	0.492672	FALSE
ARHGAP32	0.191891	0.0872701	FALSE
ARHGAP35	0.323202	0.400087	FALSE
ARHGAP4	-0.0781173	0.731675	FALSE
ARHGAP44	0.0350406	0.636364	FALSE
ARHGAP5	0.595756	0.305876	FALSE
ARHGAP6	0.133241	0.518953	FALSE
ARHGAP9	0.0932069	0.494262	FALSE
ARHGDIA	0.44596	-0.00296783	FALSE
ARHGDIB	0.255372	0.160013	FALSE
ARHGEF1	0.172867	0.39222	TRUE
ARHGEF10	0.413135	0.382564	FALSE
ARHGEF10L	0.332767	0.452275	FALSE
ARHGEF11	0.390775	0.288617	FALSE
ARHGEF12	0.403655	0.29835	FALSE
ARHGEF16	0.415146	0.521999	FALSE
ARHGEF17	0.109459	0.436522	FALSE
ARHGEF18	0.358293	-0.0473025	TRUE
ARHGEF2	0.524321	0.213444	TRUE
ARHGEF25	0.135562	0.216042	TRUE
ARHGEF35	0.399581	0.771429	FALSE
ARHGEF37	0.360636	0.296764	FALSE
ARHGEF40	0.105142	0.299613	FALSE
ARHGEF5	0.326589	0.281047	FALSE
ARHGEF6	-0.0275899	0.397756	TRUE
ARHGEF7	0.569416	0.237971	TRUE
ARID1A	0.0503224	0.0977193	TRUE
ARID1B	0.406372	0.165569	TRUE
ARID2	0.431749	0.10865	TRUE
ARID3A	0.372742	0.741506	FALSE
ARIH1	0.734938	0.172974	FALSE
ARIH2	0.494434	0.369578	FALSE
ARL1	0.336801	0.307419	TRUE
ARL14EP	0.311886	0.0686275	FALSE
ARL15	0.468363	0.444028	FALSE
ARL2	0.128533	0.00103957	TRUE
ARL2BP	0.459086	0.477442	FALSE
ARL3	0.284729	0.416647	FALSE
ARL5B	0.490819	0.0373626	FALSE
ARL6	0.150888	0.101797	FALSE
ARL6IP1	0.0842887	0.251964	FALSE
ARL6IP4	0.137844	0.256778	FALSE
ARL6IP5	0.00795959	0.171718	FALSE
ARL6IP6	0.412018	0.000550973	FALSE
ARL8A	0.389296	0.416471	FALSE
ARL8B	0.355938	0.245097	FALSE
ARMC1	0.568783	0.0769134	FALSE
ARMC10	0.474038	0.360743	FALSE
ARMC6	0.120013	0.438438	FALSE
ARMC8	0.373808	0.166707	TRUE
ARMC9	0.135774	0.303345	FALSE
ARMCX1	0.10293	0.582612	FALSE
ARMCX2	-0.0422349	0.374445	FALSE
ARMCX3	0.305116	0.763276	FALSE
ARNT	0.530339	0.178404	TRUE
ARPC1A	0.471052	-0.125739	FALSE
ARPC1B	0.393262	0.145932	TRUE
ARPC2	0.407007	-0.0432599	TRUE
ARPC3	0.156669	-0.0803521	TRUE
ARPC4	0.414049	-0.112743	TRUE
ARPC5	0.342401	0.00268279	TRUE
ARPC5L	0.363307	0.531293	FALSE
ARPP19	0.690006	0.283822	FALSE
ARRB1	0.42329	0.554838	TRUE
ARRB2	0.235451	0.416493	TRUE
ARRDC1	0.472622	0.337842	FALSE
ARSA	0.151945	0.106879	FALSE
ARSB	0.292582	0.43783	FALSE
ARSD	0.215314	0.404684	FALSE
ARSE	0.34642	0.567542	FALSE
ARVCF	0.195117	0.150463	FALSE
ASAH1	0.631987	0.175706	TRUE
ASAP1	0.428633	0.391178	TRUE
ASAP2	0.312132	0.39044	FALSE
ASB9	0.274617	0.527405	TRUE
ASCC1	0.304913	0.0492288	TRUE
ASCC2	0.319534	-0.0504553	TRUE
ASCC3	0.341329	0.453896	TRUE
ASF1A	0.369101	0.24782	TRUE
ASF1B	0.0382346	0.00606061	TRUE
ASH2L	0.803604	0.546439	TRUE
ASL	0.471765	0.718109	FALSE
ASMTL	0.281287	0.676037	FALSE
ASNA1	0.119485	0.374486	FALSE
ASNS	0.350405	0.638469	FALSE
ASPH	0.502235	0.529704	FALSE
ASPN	-0.163206	0.640001	FALSE
ASPSCR1	0.354883	0.550919	FALSE
ASRGL1	-0.0780034	0.621693	FALSE
ASS1	-0.0180363	0.822046	FALSE
ATAD1	0.527702	0.285199	FALSE
ATAD2	0.621116	0.52134	FALSE
ATAD3A	0.209817	0.384245	FALSE
ATAD3B	0.149744	0.39506	FALSE
ATAT1	0.385842	0.595238	FALSE
ATE1	0.389361	0.362917	FALSE
ATF1	0.114589	0.401864	FALSE
ATF2	0.423492	0.306373	TRUE
ATF7	0.240268	-0.349451	FALSE
ATF7IP	0.0907146	-0.198864	TRUE
ATG12	0.762741	0.262776	FALSE
ATG13	0.505553	0.748075	TRUE
ATG16L1	0.347941	0.370995	TRUE
ATG3	0.246539	0.305843	FALSE
ATG4A	0.169741	0.493895	FALSE
ATG4B	0.24648	0.32294	FALSE
ATG4C	0.283142	0.209091	FALSE
ATG5	0.396585	0.356819	FALSE
ATG7	0.35646	0.321571	FALSE
ATG9A	0.272925	-0.0365549	FALSE
ATIC	0.676726	0.524838	FALSE
ATL1	0.0311173	0.430599	TRUE
ATL2	0.372786	0.419493	TRUE
ATL3	0.202679	0.465643	TRUE
ATM	0.325048	0.3168	TRUE
ATOX1	0.343899	0.0871446	FALSE
ATP11B	0.387972	0.113808	FALSE
ATP11C	0.400506	0.469177	FALSE
ATP13A1	0.255984	0.0413746	FALSE
ATP1A1	0.418351	0.520872	FALSE
ATP1B1	0.276194	0.672859	TRUE
ATP1B3	-0.0380818	0.449095	FALSE
ATP2A2	0.28434	0.132447	TRUE
ATP2A3	0.295801	0.574011	FALSE
ATP2B1	0.455425	0.487248	FALSE
ATP2B4	0.0973469	0.382477	FALSE
ATP2C1	0.388925	0.319091	FALSE
ATP5A1	0.517609	0.413127	TRUE
ATP5B	0.21798	0.160499	TRUE
ATP5C1	0.293361	-0.0135819	TRUE
ATP5D	0.312274	0.393903	TRUE
ATP5E	0.396469	-0.126392	TRUE
ATP5F1	0.534307	-0.0143867	TRUE
ATP5G1	0.277868	0.134811	TRUE
ATP5H	0.394551	-0.0425564	TRUE
ATP5I	0.461737	-0.0337531	TRUE
ATP5J	0.385244	-0.00979241	TRUE
ATP5J2.PTCD1	0.209064	0.0485863	FALSE
ATP5L	0.143314	-0.125391	TRUE
ATP5O	0.411947	0.00504708	TRUE
ATP5S	0.556255	0.273181	FALSE
ATP5SL	0.204729	0.293115	FALSE
ATP6AP1	0.381496	0.277754	FALSE
ATP6AP2	0.457806	0.331022	FALSE
ATP6V0A1	0.268424	0.376891	FALSE
ATP6V0A2	0.318536	0.333392	FALSE
ATP6V0C	0.438017	0.0645951	TRUE
ATP6V0D1	0.295052	0.295614	TRUE
ATP6V1A	0.264924	0.221684	TRUE
ATP6V1B2	0.759162	0.650267	TRUE
ATP6V1C1	0.796861	0.385436	FALSE
ATP6V1D	0.291468	-0.00127433	FALSE
ATP6V1E1	0.159167	-0.0508229	FALSE
ATP6V1F	0.351256	0.0122068	FALSE
ATP6V1G1	0.368649	-0.0995993	FALSE
ATP6V1H	0.730831	-0.14008	FALSE
ATP8A1	0.396053	0.327056	FALSE
ATP8B1	0.355578	0.640028	FALSE
ATP9A	0.679379	0.461862	FALSE
ATPAF1	0.500229	0.232285	FALSE
ATPAF2	0.713283	0.379319	FALSE
ATPIF1	0.206411	0.486573	TRUE
ATRAID	0.430659	0.333583	FALSE
ATRN	0.601441	0.47659	FALSE
ATRX	0.455136	0.412103	TRUE
ATXN10	0.458383	0.525349	FALSE
ATXN2	0.287985	0.182967	FALSE
ATXN2L	0.328208	0.027298	FALSE
ATXN3	0.578506	0.340019	FALSE
ATXN7L3B	0.469611	0.143675	FALSE
AUH	0.530556	0.519082	FALSE
AUP1	0.310093	0.496043	TRUE
AURKA	0.400406	0.4	TRUE
AURKB	0.0429703	0.191176	TRUE
AVEN	0.536157	0.416248	FALSE
AVIL	0.127135	-0.327327	FALSE
AVL9	0.622027	0.388377	FALSE
AZGP1	0.169022	0.19391	TRUE
B2M	0.306792	0.552951	FALSE
B3GALT5	0.116008	0.411777	FALSE
B3GALT6	0.238479	0.144772	FALSE
B3GAT3	0.20455	0.238376	FALSE
B3GNT2	0.248733	-0.181319	FALSE
B3GNT3	0.429499	0.51997	FALSE
B3GNT6	0.0225953	0.685514	FALSE
B3GNT7	-0.114741	0.528624	FALSE
B3GNT8	0.163945	0.032967	FALSE
B4GALT1	0.41603	0.111942	FALSE
B4GALT3	0.388476	0.555882	FALSE
B4GALT4	0.251069	0.30914	FALSE
B4GALT7	0.202489	0.322591	FALSE
BABAM1	0.218534	0.35251	FALSE
BACE2	0.360115	0.563636	FALSE
BACH1	0.495638	0.35817	TRUE
BAD	0.0304693	0.102842	FALSE
BAG1	0.539604	0.443897	TRUE
BAG2	0.0136176	0.562879	FALSE
BAG3	0.331573	0.210645	FALSE
BAG4	0.798966	0.36052	FALSE
BAG5	0.743523	0.640543	TRUE
BAG6	0.397841	0.21278	TRUE
BAIAP2	0.202988	0.715837	FALSE
BAIAP2L1	0.380032	0.433475	FALSE
BAIAP2L2	0.0916529	0.276368	FALSE
BAK1	0.206508	0.0822589	TRUE
BANF1	0.25374	0.164171	TRUE
BASP1	0.0306744	0.40553	FALSE
BAX	0.14185	0.488648	TRUE
BAZ1A	0.639987	0.393224	TRUE
BAZ1B	0.603854	0.566391	TRUE
BAZ2A	0.223213	0.261806	TRUE
BCAM	0.282362	0.418867	FALSE
BCAP29	0.201103	0.26417	FALSE
BCAP31	0.591697	0.627369	FALSE
BCAR1	0.284373	-0.00815046	TRUE
BCAS1	-0.323392	0.835931	FALSE
BCAS2	0.222025	0.141956	TRUE
BCAS3	0.506179	0.503179	FALSE
BCAT1	0.374247	0.69765	FALSE
BCAT2	0.503995	0.55509	FALSE
BCCIP	0.57984	0.3334	TRUE
BCKDHA	0.263165	0.384404	FALSE
BCKDHB	0.207358	0.445592	FALSE
BCKDK	0.40293	0.275009	FALSE
BCL10	0.515943	0.344722	TRUE
BCL2L1	0.671502	0.690951	TRUE
BCL2L13	0.486934	0.590033	FALSE
BCL2L14	0.464577	0.639104	FALSE
BCL2L15	0.369025	0.68197	FALSE
BCL2L2.PABPN1	0.604447	-0.242091	FALSE
BCL7C	0.0928529	-0.0480891	FALSE
BCLAF1	0.247385	0.11801	FALSE
BCR	0.278375	0.140245	FALSE
BCS1L	0.260498	0.395558	FALSE
BDH1	0.373863	0.625363	FALSE
BDH2	0.34807	0.412888	FALSE
BECN1	0.601645	0.135042	TRUE
BET1	0.443596	0.55608	FALSE
BET1L	0.434357	0.221955	FALSE
BGN	0.00720231	0.624377	FALSE
BICD2	0.248312	0.198258	TRUE
BID	0.221734	0.478441	FALSE
BIN1	0.417154	0.587332	TRUE
BIN2	0.000555255	0.314775	FALSE
BIN3	0.865004	0.242729	FALSE
BIRC2	0.333575	0.29913	TRUE
BIRC5	0.299418	0.5	TRUE
BIRC6	0.308227	0.0699883	FALSE
BLMH	0.598315	0.517326	FALSE
BLNK	0.388995	0.424054	TRUE
BLOC1S1	0.0577781	0.0405121	TRUE
BLOC1S2	0.266491	0.352866	TRUE
BLOC1S3	0.384834	0.013444	TRUE
BLOC1S4	0.493518	-0.136887	TRUE
BLOC1S5	0.412164	0.0149293	TRUE
BLOC1S6	0.651817	0.222395	TRUE
BLVRA	-0.0951481	0.562738	TRUE
BLVRB	0.138488	0.39617	FALSE
BMP2K	0.0295801	0.131412	FALSE
BMS1	0.119315	0.208589	FALSE
BNIP1	0.368516	0.327273	FALSE
BNIP2	0.64974	0.273715	FALSE
BOD1	0.310445	0.429948	TRUE
BOD1L1	0.188219	0.0717154	TRUE
BOK	0.159596	0.226926	FALSE
BOLA1	0.232332	0.177451	FALSE
BOLA2	0.117374	0.399852	TRUE
BOLA3	0.0236252	0.518112	FALSE
BOP1	0.745287	0.620762	TRUE
BPGM	0.0797146	0.101563	FALSE
BPHL	0.499332	0.594751	FALSE
BPNT1	0.223867	0.303862	FALSE
BPTF	0.33809	0.144721	TRUE
BRAF	0.468901	-0.628703	TRUE
BRAP	0.485073	0.175258	FALSE
BRAT1	0.637741	0.399609	FALSE
BRCC3	0.392727	-0.182984	TRUE
BRD1	0.203218	0.125763	TRUE
BRD2	0.408569	0.183012	FALSE
BRD3	0.425134	0.264727	FALSE
BRD4	0.217014	0.115213	TRUE
BRD7	0.529377	-0.0386024	TRUE
BRD8	0.392548	0.17957	TRUE
BRD9	0.510818	0.314219	FALSE
BRE	0.525523	0.176594	TRUE
BRF1	0.580691	0.366667	TRUE
BRI3	0.367343	0.233459	FALSE
BRI3BP	0.275653	0.385187	FALSE
BRIX1	0.435987	0.234069	TRUE
BRK1	0.139548	0.161975	TRUE
BRMS1	0.158395	0.315908	TRUE
BRMS1L	0.45182	0.528571	TRUE
BROX	0.555115	0.48161	FALSE
BRPF1	0.26748	-0.00256768	TRUE
BSDC1	0.539818	0.549596	FALSE
BSG	0.0626478	0.243635	TRUE
BSPRY	0.58283	0.674559	FALSE
BST1	0.168774	0.377563	FALSE
BST2	-0.0863	0.793843	FALSE
BTAF1	0.447828	0.153602	FALSE
BTBD2	0.259275	-0.428571	FALSE
BTD	0.136695	0.168216	FALSE
BTF3	0.701822	0.349774	FALSE
BTF3L4	0.318867	0.519693	FALSE
BTK	-0.0655284	0.570252	FALSE
BTN2A1	0.590539	0.154775	FALSE
BTN3A3	0.115218	0.381386	FALSE
BUB3	0.648553	-0.078792	TRUE
BUD13	0.614485	0.0909201	TRUE
BUD31	0.462754	0.233322	TRUE
BYSL	0.608276	0.301429	FALSE
BZW1	0.274033	0.347236	TRUE
BZW2	0.606721	0.626837	FALSE
C10orf11	0.188702	0.511196	FALSE
C10orf35	0.390432	0.349606	FALSE
C10orf76	0.464876	0.331243	FALSE
C10orf99	0.242299	0.293503	FALSE
C11orf52	0.172893	0	FALSE
C11orf54	0.267791	0.411838	FALSE
C11orf58	0.230288	0.238552	FALSE
C11orf68	0.331952	0.248086	FALSE
C11orf96	0.0834487	0.376132	FALSE
C12orf10	0.351318	0.408872	FALSE
C12orf29	0.461607	0.0939112	FALSE
C12orf4	0.45778	-0.00165985	FALSE
C12orf43	0.320667	0.135802	FALSE
C12orf45	0.400157	0.410593	FALSE
C12orf57	0.428603	-0.139223	FALSE
C12orf75	0.166972	0.23956	FALSE
C14orf1	0.437324	0.399633	FALSE
C14orf159	0.36841	0.17707	FALSE
C14orf166	0.561125	0.335499	FALSE
C14orf2	0.237652	0.0346938	FALSE
C15orf38.AP3S2	0.170292	0.205507	FALSE
C15orf40	0.636305	0.380145	FALSE
C15orf48	0.416005	0.71354	FALSE
C15orf52	0.188254	0.376856	FALSE
C15orf57	0.579287	-0.195604	FALSE
C16orf58	0.519736	0.540439	FALSE
C16orf62	0.157803	0.742262	TRUE
C16orf70	0.502494	-0.230467	FALSE
C16orf91	0.425935	0.0334658	FALSE
C17orf49	0.488234	0.442112	FALSE
C17orf58	0.322336	-0.269601	FALSE
C17orf62	0.513477	0.108239	FALSE
C17orf75	0.623995	0.407462	FALSE
C18orf21	0.567374	-0.5	FALSE
C18orf25	0.477979	0.303109	FALSE
C18orf32	0.442317	0.281379	FALSE
C18orf8	0.622688	0.547437	FALSE
C19orf12	0.405876	0.718063	FALSE
C19orf25	0.291756	0.215867	FALSE
C19orf33	0.249958	0.53468	FALSE
C19orf43	0.0373639	0.245395	TRUE
C19orf53	0.160859	0.445363	FALSE
C19orf66	0.149017	0.471996	FALSE
C19orf70	0.141897	0.057093	FALSE
C1D	0.357926	-0.219976	FALSE
C1GALT1	0.336631	0.137709	FALSE
C1GALT1C1	0.353623	0	FALSE
C1orf116	0.332551	0.44158	FALSE
C1orf122	0.242229	0.404488	FALSE
C1orf123	0.360441	0.260654	FALSE
C1orf131	0.505883	-0.5	FALSE
C1orf174	0.638776	0.306291	FALSE
C1orf198	0.181493	0.538492	FALSE
C1orf21	0.0925674	0.493022	FALSE
C1orf210	0.4445	0.717982	FALSE
C1orf226	0.521647	-0.178947	FALSE
C1orf27	0.476748	0.128475	FALSE
C1orf35	0.156212	0.276621	FALSE
C1orf50	0.391411	0.0185574	FALSE
C1QA	-0.103287	0.280744	TRUE
C1QB	-0.0434624	0.221732	TRUE
C1QBP	0.609024	0.381622	TRUE
C1QC	-0.139796	0.251652	TRUE
C1QTNF3	0.217059	0.702731	FALSE
C1QTNF5	0.0547759	0.455882	FALSE
C1R	0.15985	0.43806	FALSE
C1RL	0.449377	0.231944	FALSE
C1S	0.159704	0.366036	FALSE
C2	0.292215	0.549799	FALSE
C20orf24	0.334863	0.361958	FALSE
C20orf27	0.822794	0.739669	FALSE
C21orf33	0.477996	0.264427	FALSE
C21orf59	0.624914	0.228263	FALSE
C2CD5	0.578143	0.479472	FALSE
C2orf49	0.439928	0.124061	FALSE
C2orf69	0.144678	0.114254	FALSE
C2orf72	0.039114	0.012803	FALSE
C2orf76	0.0499819	0.0769231	FALSE
C2orf88	-0.274469	0.378643	FALSE
C3	-0.0285034	0.339272	TRUE
C3orf38	0.279173	0.0269433	FALSE
C3orf58	0.149575	0.369779	FALSE
C4A	0.171842	0.462394	FALSE
C4B	0.168117	0.384951	FALSE
C4BPA	0.170937	-0.149696	FALSE
C4BPB	0.064717	-0.105969	FALSE
C4orf3	0.363246	0.0215617	FALSE
C4orf32	0.280274	0.568356	FALSE
C4orf33	0.418125	-0.0493506	FALSE
C5	0.428911	-0.0121746	FALSE
C5AR1	-0.0971712	0.599572	FALSE
C5orf15	0.321723	-0.0750988	FALSE
C5orf24	0.32935	0.585111	FALSE
C5orf51	0.485471	0.205959	FALSE
C6orf106	0.527402	-0.392857	FALSE
C6orf132	0.618913	0.425819	FALSE
C6orf203	0.0356634	0.259355	FALSE
C6orf47	0.646312	0.368577	FALSE
C6orf89	0.687925	0.0437301	FALSE
C7	0.124292	0.526468	FALSE
C7orf25	0.489602	0.115152	FALSE
C7orf26	0.565973	-0.0365476	FALSE
C7orf43	0.512436	-0.173626	FALSE
C7orf50	0.382704	0.338805	FALSE
C7orf73	0.333963	0.122549	FALSE
C8orf33	0.726152	0.653756	FALSE
C8orf4	0.0711948	0.4	FALSE
C8orf59	0.621045	0.406593	FALSE
C8orf82	0.532552	0.449218	FALSE
C8orf88	-0.0904048	0.129597	FALSE
C9orf142	0.342517	0.252436	FALSE
C9orf152	0.488596	0.309524	FALSE
C9orf40	0.435307	0.27451	FALSE
C9orf64	0.269495	0.392642	FALSE
C9orf78	0.351498	0.288453	FALSE
CA12	0.247875	0.716719	FALSE
CA13	0.487373	0.703288	FALSE
CA2	0.0984821	0.644335	FALSE
CA4	0.0107312	0.617255	FALSE
CA8	-0.184612	0.433824	FALSE
CA9	0.141292	0.683505	FALSE
CAAP1	0.542187	-0.0275423	FALSE
CAB39	0.344318	0.264005	TRUE
CAB39L	0.379527	0.675978	FALSE
CACFD1	0.271314	0.131731	FALSE
CACNA2D1	-0.296245	0.659878	FALSE
CACTIN	0.346031	-0.199923	TRUE
CACUL1	0.603664	0.228149	FALSE
CACYBP	-0.0736068	0.403451	TRUE
CAD	0.248197	0.278428	FALSE
CADM1	0.136002	0.499314	TRUE
CADM4	0.203165	0.0445214	FALSE
CADPS	0.148363	0.849121	FALSE
CADPS2	0.064344	0	FALSE
CALB2	0.204022	0.757262	FALSE
CALCOCO1	0.151438	0.316824	FALSE
CALCOCO2	0.43851	0.344051	FALSE
CALD1	-0.236284	0.624688	FALSE
CALM2	0.0865306	0.295408	FALSE
CALML4	0.522167	0.431599	FALSE
CALR	0.135122	0.333778	TRUE
CALU	0.0950832	0.32685	FALSE
CAMK1	0.0531794	0.443872	FALSE
CAMK1D	-0.145982	0.684541	FALSE
CAMK2D	0.521087	0.650905	TRUE
CAMK2G	0.3216	0.419253	FALSE
CAMKK2	0.464509	0.320512	FALSE
CAMKMT	0.267248	0.577193	FALSE
CAMLG	0.160188	0.434066	TRUE
CAMSAP3	0.217134	0.022653	FALSE
CAND1	0.641807	0.362998	TRUE
CANT1	0.492313	0.697463	FALSE
CANX	0.292409	0.296201	TRUE
CAP1	0.296621	0.503664	TRUE
CAP2	-0.0159668	0.458584	FALSE
CAPG	0.193366	0.574847	TRUE
CAPN1	0.278224	0.427074	TRUE
CAPN15	0.224419	0.189189	FALSE
CAPN2	0.17376	0.669173	FALSE
CAPN5	0.292271	0.631086	FALSE
CAPN6	-0.109783	0.669516	FALSE
CAPN7	0.264663	0.103386	FALSE
CAPN9	0.480516	0.550663	FALSE
CAPNS1	0.414966	0.14712	TRUE
CAPRIN1	0.447214	0.556141	TRUE
CAPS	0.0730279	0.598971	FALSE
CAPZA1	0.37638	0.227812	TRUE
CAPZA2	0.281982	0.16491	FALSE
CAPZB	0.468754	0.428888	TRUE
CARD16	0.148928	0.594534	FALSE
CARHSP1	0.260411	0.476089	FALSE
CARM1	0.201841	0.333378	TRUE
CARS	0.201549	0.446289	FALSE
CARS2	0.501546	0.533996	FALSE
CASC3	0.386839	0.0412353	TRUE
CASC4	0.38525	0.430027	FALSE
CASD1	0.0535778	0.531479	FALSE
CASK	0.64302	0.592403	TRUE
CASKIN2	0.168517	0.00534923	FALSE
CASP1	0.242744	0.891874	TRUE
CASP10	0.272211	0.619833	TRUE
CASP2	0.252892	0.179307	TRUE
CASP3	0.421657	0.341672	FALSE
CASP4	0.017641	0.345211	FALSE
CASP5	0.189677	0.0500447	TRUE
CASP6	0.421662	0.446986	FALSE
CASP7	0.423658	0.456512	FALSE
CASP8	0.476728	0.529946	TRUE
CASP9	0.513348	0.172581	TRUE
CAST	0.714232	0.811758	FALSE
CAT	0.170869	0.131212	FALSE
CAV1	-0.0579853	0.451189	TRUE
CAV2	-0.241359	0.395144	FALSE
CBFB	0.417073	0.234582	TRUE
CBL	0.280329	0.267293	TRUE
CBLB	0.17959	-0.0103501	TRUE
CBLL1	0.477598	0.0128362	FALSE
CBR1	0.164829	0.292053	FALSE
CBR3	-0.0439308	0.466649	FALSE
CBR4	0.614456	0.255798	FALSE
CBWD1	0.541913	0.334047	FALSE
CBX1	0.322651	-0.0299806	FALSE
CBX3	0.42713	-0.0599613	TRUE
CBX5	0.146143	0.425222	TRUE
CBX7	0.166236	0.60876	FALSE
CBX8	0.229743	0.382403	TRUE
CC2D1A	0.263186	0.312298	FALSE
CC2D1B	0.140152	0.364374	FALSE
CCAR1	0.252295	0.198866	TRUE
CCAR2	0.736598	0.732138	TRUE
CCDC102A	0.361464	0.202643	FALSE
CCDC115	0.637174	-0.25673	FALSE
CCDC117	0.548487	0.0245614	FALSE
CCDC12	0.361588	0.199849	FALSE
CCDC124	0.0877551	0.453577	FALSE
CCDC126	0.315488	0.582418	FALSE
CCDC127	0.46721	0.243445	FALSE
CCDC134	0.507231	0.588291	FALSE
CCDC137	0.53113	0.32967	FALSE
CCDC167	0.263082	0	FALSE
CCDC174	0.436672	0.257143	FALSE
CCDC22	0.479337	0.0809048	TRUE
CCDC25	0.770481	0.56458	FALSE
CCDC28A	0.258103	0.326983	FALSE
CCDC43	0.472026	0.34522	FALSE
CCDC47	0.567571	0.456655	FALSE
CCDC50	0.0735827	0.461678	FALSE
CCDC51	0.103619	0.141632	FALSE
CCDC58	0.351126	0.308914	FALSE
CCDC59	0.638957	0.043956	FALSE
CCDC6	0.489519	0.379889	FALSE
CCDC61	0.183104	0.0240169	FALSE
CCDC69	0.100687	-0.0298246	FALSE
CCDC71L	0.296621	0.509091	FALSE
CCDC74A	0.0644795	-0.316228	FALSE
CCDC80	-0.0945757	0.602613	FALSE
CCDC86	0.442485	0.372896	FALSE
CCDC88B	0.411788	0.66081	FALSE
CCDC9	0.229625	0.0930654	FALSE
CCDC90B	0.314471	0.0217014	FALSE
CCDC91	0.589859	0.510354	FALSE
CCDC92	0.138227	0.286713	TRUE
CCDC93	0.258891	0.02438	TRUE
CCDC94	0.219001	0.366069	FALSE
CCDC97	0.383223	0.273814	FALSE
CCL15	0.382407	0.33985	FALSE
CCL17	0.0443642	-0.486506	FALSE
CCL18	-0.212476	0.527473	FALSE
CCL20	0.413974	0.394868	FALSE
CCL21	-0.0566389	0.631086	FALSE
CCL24	-0.17189	0.525067	FALSE
CCL5	-0.224118	0.0857143	FALSE
CCM2	0.4794	0.350945	FALSE
CCNB1	0.189381	0.356658	TRUE
CCNH	0.509644	0.210057	TRUE
CCNK	0.434549	0.14073	TRUE
CCNL1	0.348981	0.58694	FALSE
CCNT1	0.567632	0.0576538	TRUE
CCNT2	0.531686	0.7	TRUE
CCNY	0.437017	-0.00686691	FALSE
CCNYL1	0.253274	0.368742	FALSE
CCPG1	0.281372	0.248696	FALSE
CCS	0.230497	0.115968	FALSE
CCT2	0.300285	0.191516	TRUE
CCT3	0.047923	0.247124	TRUE
CCT4	0.31482	0.113887	TRUE
CCT5	0.407294	0.0942991	TRUE
CCT6A	0.267745	0.145594	TRUE
CCT7	0.309502	0.214427	TRUE
CCT8	0.532236	0.396499	TRUE
CCZ1	0.17076	0.0653962	FALSE
CD109	0.208739	0.551193	FALSE
CD14	-0.00156283	0.596719	FALSE
CD151	-0.0061872	0.358993	TRUE
CD163	0.200032	0.491142	FALSE
CD163L1	0.0614641	0.356341	FALSE
CD164	0.434801	-0.0340405	FALSE
CD177	0.0238735	0.165927	FALSE
CD180	0.0272045	0.274184	FALSE
CD2	0.0420691	0.568862	FALSE
CD200	0.100188	0.206494	FALSE
CD209	0.169277	0.366444	FALSE
CD248	0.0438466	0.424036	FALSE
CD27	-0.00575746	0.0909091	FALSE
CD276	0.433425	0.435983	FALSE
CD2AP	0.292945	0.56269	TRUE
CD2BP2	0.160023	0.154449	TRUE
CD300A	0.0831111	0.600267	FALSE
CD320	-0.0219865	0.0714286	FALSE
CD34	-0.179504	0.242681	FALSE
CD36	-0.0373672	0.516198	FALSE
CD38	0.423945	0.607992	FALSE
CD3E	0.218293	0.630075	FALSE
CD3EAP	0.252904	0.527484	TRUE
CD4	0.0179148	0.497568	FALSE
CD40	0.0555373	0.741374	FALSE
CD44	0.177243	0.444847	TRUE
CD46	0.365435	0.5778	FALSE
CD47	0.334805	0.420376	TRUE
CD48	-0.135416	0.40114	FALSE
CD5	-0.203522	0.305124	FALSE
CD53	-0.0738736	0.490315	TRUE
CD55	0.0145918	0.212911	FALSE
CD58	0.157586	0.218863	FALSE
CD59	0.184798	0.26345	FALSE
CD63	0.391702	0.049297	TRUE
CD68	0.379346	0.223645	FALSE
CD74	0.0297438	0.607963	FALSE
CD81	0.129329	0.228171	TRUE
CD82	-0.0764262	0.455556	FALSE
CD8A	-0.273165	0.795329	TRUE
CD9	0.587969	0.395681	TRUE
CD93	-0.133529	0.229713	FALSE
CD99	0.144953	0.436325	FALSE
CD99L2	0.263952	0.277603	FALSE
CDA	0.0453748	0.461936	FALSE
CDC123	0.314415	0.0822613	FALSE
CDC16	0.640016	0.483325	TRUE
CDC23	0.438291	-0.0509648	TRUE
CDC26	0.279816	0.376881	FALSE
CDC27	0.505679	0.461023	TRUE
CDC34	0.241308	0.514286	TRUE
CDC37	0.209531	0.442	TRUE
CDC37L1	0.46147	0.368341	FALSE
CDC40	0.591317	0.355073	TRUE
CDC42	0.626557	0.179696	TRUE
CDC42BPA	0.556871	0.507837	FALSE
CDC42BPB	0.485418	0.316742	FALSE
CDC42BPG	0.190324	0.437985	FALSE
CDC42EP1	0.197192	0.132661	FALSE
CDC42EP2	0.231942	0.663636	FALSE
CDC42EP3	0.0397933	0.660594	FALSE
CDC42EP4	0.550718	0.161955	FALSE
CDC42EP5	0.0401883	0.465399	FALSE
CDC42SE1	0.416053	0.465832	FALSE
CDC42SE2	0.471053	0.479352	FALSE
CDC5L	0.378448	0.214647	TRUE
CDC73	0.529296	0.151679	TRUE
CDCA5	0.259711	0.61094	TRUE
CDCA7	0.25939	-0.05	FALSE
CDCA8	0.117856	0.5	TRUE
CDCP1	0.32174	0.140473	TRUE
CDH1	0.344941	0.117339	TRUE
CDH11	-0.00944418	0.578112	FALSE
CDH13	0.0617298	0.275112	FALSE
CDH17	0.503829	0.602956	FALSE
CDH3	0.0563683	0.528979	FALSE
CDH5	0.104873	0.48359	TRUE
CDHR5	0.0533864	0.413898	FALSE
CDIPT	0.320675	0.302782	FALSE
CDK1	0.489162	0.426062	TRUE
CDK11A	0.23948	0.301693	FALSE
CDK11B	0.358346	0.394148	FALSE
CDK12	0.429725	0.273237	TRUE
CDK13	0.462481	0.104711	FALSE
CDK16	0.240424	0.117647	FALSE
CDK17	0.415156	0	FALSE
CDK18	0.447158	0.192601	FALSE
CDK19	0.439642	0.5	TRUE
CDK2	0.290425	0.302314	TRUE
CDK2AP2	0.395118	0.357143	FALSE
CDK3	0.283994	-0.285714	FALSE
CDK4	0.311633	0.160192	TRUE
CDK5	0.558504	0.646655	TRUE
CDK5RAP1	0.739908	0.509513	FALSE
CDK5RAP3	0.414239	0.148327	FALSE
CDK6	0.323482	0.48505	TRUE
CDK7	0.3459	0.16886	TRUE
CDK8	0.74903	0.450593	TRUE
CDK9	0.461209	-0.0369725	TRUE
CDKAL1	0.571343	0.491947	FALSE
CDKN1A	0.0581018	0.8	TRUE
CDKN1B	0.35302	0.191567	TRUE
CDKN2A	-0.0220665	-0.0285714	TRUE
CDKN2AIP	0.515441	0.387004	FALSE
CDKN2AIPNL	0.163787	0.171789	FALSE
CDKN2C	0.113214	0.149015	FALSE
CDS1	0.456286	0.456426	TRUE
CDS2	0.819372	0.468029	FALSE
CDV3	0.491618	0.263299	FALSE
CDX1	0.391348	0.568302	FALSE
CDX2	0.0376737	0.475557	TRUE
CDYL	0.595499	0.447272	TRUE
CEACAM1	0.113627	0.340812	FALSE
CEACAM5	0.15604	-0.0420534	FALSE
CEACAM6	0.139574	0.551446	FALSE
CEACAM7	-0.0716472	0.727742	FALSE
CEBPB	0.565553	0.205707	FALSE
CEBPG	0.435029	0.214942	FALSE
CEBPZ	0.247063	0.193464	FALSE
CEL	0.0309806	0.796692	FALSE
CELF1	0.443321	0.434481	FALSE
CELF2	0.0228962	0.398831	FALSE
CEMIP	0.189878	0.589919	FALSE
CENPB	0.861634	0.427563	TRUE
CENPC	0.500721	0.0902512	TRUE
CENPV	0.368845	0.409085	FALSE
CEP170	0.150794	0.590295	FALSE
CEP170B	0.41387	0.179936	FALSE
CEP41	0.413076	0.268248	FALSE
CEP44	0.638615	0.153113	FALSE
CEP55	0.390299	0.602476	TRUE
CEPT1	0.586437	0.47129	FALSE
CERS2	0.381686	0.336747	FALSE
CERS6	0.271933	0.416674	FALSE
CES1	0.223968	0.808019	FALSE
CES2	0.34467	0.788668	FALSE
CES3	-0.143627	0.451131	FALSE
CETN2	0.34969	0.081053	FALSE
CETN3	0.505851	0.231579	FALSE
CFB	0.2588	-0.0230552	FALSE
CFD	0.047167	0.232523	FALSE
CFDP1	0.180307	0.326799	FALSE
CFH	0.0479578	0.298518	FALSE
CFI	0.0204389	0.226833	FALSE
CFL1	0.277963	0.118913	TRUE
CFL2	0.0263742	0.666516	FALSE
CFLAR	0.112191	1	TRUE
CFP	0.131441	0.140172	FALSE
CGGBP1	0.530532	0.163235	FALSE
CGN	0.410892	0.526053	FALSE
CGREF1	0.192574	0.475315	FALSE
CHAF1B	0.336405	0.495095	TRUE
CHAMP1	0.35893	0.384436	FALSE
CHCHD1	0.18211	-0.210423	FALSE
CHCHD10	0.412004	0.490874	FALSE
CHCHD2	0.205847	0.020892	FALSE
CHCHD3	0.41275	0.225762	TRUE
CHCHD4	0.361477	0.172349	FALSE
CHCHD5	0.246032	0.445455	FALSE
CHCHD6	0.30783	0.0222425	TRUE
CHCHD7	0.665101	0.101294	FALSE
CHD1	0.74686	0.456325	FALSE
CHD1L	0.229546	0.28745	FALSE
CHD2	0.277792	0.38388	FALSE
CHD3	0.275398	-0.13365	TRUE
CHD4	0.00943906	0.330874	TRUE
CHD8	0.393563	0.0767455	TRUE
CHDH	0.493891	0.593112	FALSE
CHEK2	0.379973	0.373592	TRUE
CHERP	0.25805	0.181715	TRUE
CHI3L1	-0.250326	0.630363	FALSE
CHIC2	0.313385	0.583333	FALSE
CHID1	0.0739938	0.573422	FALSE
CHIT1	-0.145203	-0.0539216	FALSE
CHKB	0.501963	0.224107	FALSE
CHL1	-0.23307	0.336315	FALSE
CHM	0.287819	0.375928	TRUE
CHMP1A	0.464581	0.669819	TRUE
CHMP1B	0.618003	0.422999	TRUE
CHMP2A	-0.0110048	0.267945	TRUE
CHMP2B	0.477186	0.364505	TRUE
CHMP3	0.469353	0.299572	TRUE
CHMP4A	0.574649	0.403253	TRUE
CHMP4B	0.707028	0.527407	TRUE
CHMP4C	0.409284	0.463925	TRUE
CHMP5	0.29441	0.297708	TRUE
CHMP6	0.338856	0.268996	TRUE
CHMP7	0.906162	0.464557	FALSE
CHORDC1	0.242158	0.548907	FALSE
CHP1	0.369447	0.180672	FALSE
CHP2	-0.0039248	0.412759	FALSE
CHPF2	0.362353	-0.130957	FALSE
CHRAC1	0.790493	0.313568	TRUE
CHRDL1	0.0418288	0.55614	FALSE
CHRDL2	0.0592968	0.245113	TRUE
CHST14	0.222742	0.619048	FALSE
CHTF18	0.283995	0.244499	TRUE
CHTF8	-0.0292481	0.119048	TRUE
CHTOP	0.280732	0.16505	TRUE
CHUK	0.305446	0.38736	TRUE
CHURC1	0.283455	-0.8	FALSE
CIAO1	0.577847	0.0497011	TRUE
CIAPIN1	0.31262	0.40995	FALSE
CIB1	0.58111	0.177853	TRUE
CIB2	0.23946	-1	FALSE
CILP	0.0410334	0.625063	FALSE
CINP	0.498215	0.6	FALSE
CIR1	0.30285	0.506227	FALSE
CIRBP	0.198073	0.49886	TRUE
CISD1	0.332483	0.294041	FALSE
CISD2	0.551068	0.328605	TRUE
CISD3	0.301137	0.213717	FALSE
CIZ1	0.364856	0.0226796	FALSE
CKAP2	0.33042	0.232143	FALSE
CKAP4	0.464901	0.679114	FALSE
CKAP5	0.38184	0.324041	TRUE
CKB	0.189132	0.420411	TRUE
CKMT1A	0.335226	0.653082	FALSE
CKMT2	-0.00468866	0.835792	FALSE
CKS1B	0.152273	0.502451	TRUE
CLASP1	0.270284	-0.0445346	FALSE
CLASP2	0.292614	0.0937665	FALSE
CLASRP	0.317167	-0.135595	FALSE
CLC	0.0748839	0.486606	FALSE
CLCA1	0.116344	0.605999	FALSE
CLCA4	-0.0332918	0.471861	FALSE
CLCC1	0.498008	0.202004	FALSE
CLCN3	0.641247	0.310077	FALSE
CLCN7	0.415051	0.349817	FALSE
CLDN1	0.0859802	0.363636	TRUE
CLDN3	0.314819	0.370023	FALSE
CLDN4	0.529428	0.277177	FALSE
CLDN7	0.409412	0.265411	FALSE
CLDND1	0.45094	0.488235	FALSE
CLEC11A	-0.0378206	0.615174	FALSE
CLEC16A	0.40101	-0.0196881	FALSE
CLEC3B	0.0758587	0.0365144	FALSE
CLIC1	0.387956	0.471596	FALSE
CLIC2	0.0265312	0.4198	FALSE
CLIC3	0.18398	0.452684	FALSE
CLIC4	0.171365	0.506673	FALSE
CLIC5	0.161458	0.706211	TRUE
CLINT1	0.475497	0.73519	FALSE
CLIP1	0.338745	0.586233	TRUE
CLIP2	0.435618	0.388132	FALSE
CLK3	0.531858	0.21203	FALSE
CLMN	0.43162	0.633897	FALSE
CLN5	0.413104	0.352647	FALSE
CLN6	0.63863	0.135643	FALSE
CLN8	0.672263	1	FALSE
CLNS1A	0.330922	0.166828	TRUE
CLP1	0.324565	-0.138519	TRUE
CLPB	0.379793	0.371402	FALSE
CLPP	0.081909	0.29641	TRUE
CLPTM1	0.305619	-0.0438974	FALSE
CLPTM1L	0.45909	0.331321	FALSE
CLPX	0.746368	0.294956	TRUE
CLRN3	0.382551	0.523061	FALSE
CLSTN1	0.239295	0.287984	FALSE
CLTA	0.387924	0.148491	FALSE
CLTB	0.384662	0.519014	FALSE
CLTC	0.574251	0.603219	TRUE
CLU	0.0485221	0.473213	FALSE
CLUAP1	0.162281	-1	FALSE
CLUH	0.0929859	0.0792086	FALSE
CLYBL	0.404684	0.706809	FALSE
CMAS	0.407174	0.337595	FALSE
CMBL	0.32839	0.797304	FALSE
CMC1	0.423855	0.0406276	TRUE
CMC2	-0.000180621	0.194861	FALSE
CMC4	0.349216	0.371718	FALSE
CMIP	0.136829	-0.115843	FALSE
CMPK1	0.667182	0.595806	FALSE
CMPK2	0.209274	0.404462	FALSE
CMSS1	0.376333	0.285791	FALSE
CMTM4	-0.0670403	0.562387	FALSE
CMTM6	0.100008	0.115264	FALSE
CMTM7	0.0641258	-0.214286	FALSE
CMTR1	0.679809	0.498235	FALSE
CNBP	0.233234	0.223675	FALSE
CNDP2	0.301308	0.215165	FALSE
CNIH1	0.564247	0.571429	FALSE
CNIH4	0.0102041	0.124293	FALSE
CNN1	-0.161111	0.688979	FALSE
CNN2	0.0901552	0.279568	FALSE
CNN3	-0.116312	0.423105	TRUE
CNNM2	0.394857	-0.043956	FALSE
CNNM3	0.424767	0.176014	FALSE
CNNM4	0.0872854	0.288495	FALSE
CNOT1	0.39422	0.379765	TRUE
CNOT10	0.336385	-0.07834	TRUE
CNOT11	0.597644	0.0855823	TRUE
CNOT2	0.501943	0.0968604	TRUE
CNOT3	0.335348	0.115562	TRUE
CNOT4	0.391011	0.0967786	FALSE
CNOT6	0.416356	-0.2	TRUE
CNOT6L	0.446058	0.1	TRUE
CNOT7	0.834777	0.233298	TRUE
CNOT8	0.597647	-0.5	TRUE
CNP	0.372859	0.622707	FALSE
CNPY2	0.290113	0.226813	FALSE
CNPY3	0.616908	0.683077	FALSE
CNPY4	-0.0934354	0.545845	FALSE
CNRIP1	-0.195147	0.323117	FALSE
COA1	0.501398	0.213187	TRUE
COA3	0.385169	0.254364	TRUE
COA4	0.138602	0.030889	FALSE
COA5	0.462325	0.338711	FALSE
COA6	0.281395	0.0637508	FALSE
COA7	0.334342	0.220742	FALSE
COASY	0.452575	0.510765	FALSE
COBL	0.505822	0.40074	FALSE
COBLL1	0.264916	0.248468	TRUE
COG1	0.383422	0.414221	TRUE
COG2	0.571305	0.442352	TRUE
COG3	0.590115	0.559751	TRUE
COG4	0.352913	0.38506	TRUE
COG5	0.550102	0.126402	TRUE
COG6	0.464308	-0.00254867	TRUE
COG7	0.4153	0.304434	TRUE
COG8	0.420598	0.167314	TRUE
COIL	0.563933	0.507483	TRUE
COL10A1	0.141384	0.690423	FALSE
COL11A1	-0.447606	0.488386	FALSE
COL12A1	0.315847	0.456795	FALSE
COL14A1	-0.156581	0.391874	FALSE
COL15A1	-0.182245	0.423716	FALSE
COL16A1	-0.169609	0.511494	FALSE
COL17A1	0.348607	0.72956	FALSE
COL18A1	-0.27747	0.286216	TRUE
COL1A1	0.0163674	0.364158	TRUE
COL1A2	-0.262559	0.413619	FALSE
COL3A1	-0.117509	0.354064	FALSE
COL4A1	0.0286341	0.25175	FALSE
COL4A2	0.0714749	0.233976	FALSE
COL4A3BP	0.70753	0.6809	FALSE
COL5A1	-0.0810613	0.360327	FALSE
COL5A2	-0.0656652	0.473997	FALSE
COL5A3	0.0179399	0.208019	FALSE
COL6A1	-0.276573	0.26926	FALSE
COL6A2	-0.268459	0.331916	FALSE
COL6A3	-0.148834	0.211833	TRUE
COL7A1	0.165865	0.258771	FALSE
COL8A1	-0.0793552	0.306718	FALSE
COLEC12	0.0736633	0.553485	FALSE
COLGALT1	0.133866	0.508384	TRUE
COMMD1	0.0732834	0.285476	TRUE
COMMD10	0.564226	0.1531	TRUE
COMMD2	0.353614	-0.0966983	TRUE
COMMD3	0.113879	0.0431799	TRUE
COMMD3.BMI1	0.209635	0.258262	FALSE
COMMD4	0.460679	-0.0547973	TRUE
COMMD5	0.584335	-0.0419901	TRUE
COMMD6	0.499568	-0.0487273	TRUE
COMMD7	0.574837	-0.0180292	TRUE
COMMD8	0.614988	0.109699	TRUE
COMMD9	0.261025	0.0135144	TRUE
COMP	-0.0838924	0.856872	FALSE
COMT	0.564198	0.672312	FALSE
COMTD1	0.106537	0.340398	FALSE
COPA	0.409023	0.233088	FALSE
COPB1	0.321751	0.33617	FALSE
COPB2	0.346306	0.251681	TRUE
COPE	0.0601006	-0.0196346	FALSE
COPG1	0.339126	0.094111	FALSE
COPG2	0.423634	0.499124	FALSE
COPS2	0.635157	0.189277	TRUE
COPS3	0.672354	0.446082	TRUE
COPS4	0.445866	0.115866	TRUE
COPS5	0.556099	-0.245821	TRUE
COPS6	0.563803	-0.0264934	TRUE
COPS7A	0.496508	-0.0360185	TRUE
COPS7B	0.432195	0.415006	FALSE
COPS8	0.33806	0.0669718	TRUE
COPZ1	0.430124	0.246485	FALSE
COPZ2	-0.153411	0.652947	FALSE
COQ10B	0.217803	0.0391833	FALSE
COQ3	0.292746	0.197649	FALSE
COQ4	0.245458	-0.464286	FALSE
COQ5	0.0983067	0.0469503	FALSE
COQ6	0.60339	0.440507	FALSE
COQ7	0.200062	0.159713	FALSE
COQ9	0.215344	0.312877	FALSE
CORO1A	0.0404598	0.418833	FALSE
CORO1B	0.200934	0.608734	FALSE
CORO1C	0.306336	0.46617	FALSE
CORO2A	0.477746	0.561596	TRUE
COTL1	0.249608	0.66243	FALSE
COX11	0.542463	0.225254	FALSE
COX14	0.0303066	0.153383	TRUE
COX15	0.522373	0.436265	TRUE
COX16	0.350335	-0.5	TRUE
COX17	0.302847	0.0860204	FALSE
COX18	0.582396	0.485981	FALSE
COX19	0.62579	0.087525	FALSE
COX20	0.223606	0.451979	FALSE
COX4I1	0.196479	0.181593	TRUE
COX5A	0.481839	0.0925233	TRUE
COX5B	0.221913	0.102835	FALSE
COX6A1	0.115586	-0.0971671	FALSE
COX6B1	0.224849	0.196112	FALSE
COX6C	0.584386	0.099917	TRUE
COX7A1	0.047944	0.477481	FALSE
COX7A2	0.141178	0.0456592	FALSE
COX7A2L	0.240552	0.203473	FALSE
COX7B	0.139062	-0.0615039	FALSE
COX7C	0.53948	0.143161	FALSE
COX8A	0.147173	-0.159423	FALSE
CP	-0.0680124	0.0583574	TRUE
CPA3	-0.0760126	0.293868	FALSE
CPD	0.546897	0.71603	FALSE
CPE	0.0408855	0.396429	FALSE
CPEB4	0.21565	0.464286	FALSE
CPM	0.0967521	0.365154	FALSE
CPNE1	0.814339	0.744261	FALSE
CPNE2	0.464142	0.278535	FALSE
CPNE3	0.714852	0.461594	FALSE
CPNE8	0.0304966	0.047619	FALSE
CPOX	0.55243	0.541244	FALSE
CPPED1	0.252557	0.474475	FALSE
CPQ	-0.0165989	0.335374	FALSE
CPSF1	0.511327	0.341818	TRUE
CPSF2	0.739946	0.278277	TRUE
CPSF3	0.523389	0.378715	TRUE
CPSF4	0.682745	-0.148296	TRUE
CPSF6	0.413995	0.217048	TRUE
CPSF7	0.388898	0.390841	TRUE
CPT1A	0.396575	0.714415	FALSE
CPT2	0.496304	0.620908	FALSE
CPVL	0.0604441	0.252674	FALSE
CPXM2	0.105871	0.136716	FALSE
CPZ	-0.334281	0.290192	FALSE
CRABP2	-0.0763373	0.744547	FALSE
CRADD	0.110101	0.280789	TRUE
CRAT	0.265854	0.772132	FALSE
CRB3	0.134805	0.142857	FALSE
CRBN	0.28838	0.192077	TRUE
CRCP	0.565849	-0.171538	FALSE
CREB1	0.19106	0.124954	TRUE
CREBBP	0.337367	-0.0373497	TRUE
CREG1	0.138226	0.109274	FALSE
CRELD1	0.122709	0.52877	FALSE
CRELD2	0.45197	0.298658	FALSE
CRIP1	0.489925	0.739281	FALSE
CRIP2	-0.00401036	0.518617	FALSE
CRIPT	0.317182	-0.300132	FALSE
CRISPLD2	0.168248	0.493596	FALSE
CRK	0.545558	0.56407	TRUE
CRKL	0.452183	0.269222	FALSE
CRLF3	0.454441	0.478873	FALSE
CRNKL1	0.801574	0.566207	TRUE
CROCC	-0.0267302	0.0281566	FALSE
CROT	0.368147	0.415505	FALSE
CRTAP	0.0455998	0.280689	FALSE
CRTC1	0.250933	-0.0309267	FALSE
CRTC2	0.334902	0.071658	FALSE
CRTC3	0.209882	0.0776537	FALSE
CRYAB	-0.242459	0.600592	FALSE
CRYL1	0.521062	0.613218	FALSE
CRYM	-0.0259105	0.631902	FALSE
CRYZ	0.149913	0.655359	FALSE
CRYZL1	0.399143	0.17971	FALSE
CS	0.181245	0.307841	TRUE
CSDE1	0.283654	0.298994	TRUE
CSE1L	0.337121	0.531393	FALSE
CSF1R	0.00825011	0.251619	FALSE
CSK	0.365905	0.442099	FALSE
CSNK1A1	0.681629	0.187436	FALSE
CSNK1D	0.570392	0.105011	FALSE
CSNK1G1	0.6367	-0.0686275	FALSE
CSNK1G3	0.718314	0.241088	FALSE
CSNK2A1	0.935183	0.645886	TRUE
CSNK2A2	0.42529	0.381244	TRUE
CSNK2B	0.518288	0.123763	TRUE
CSRP1	0.270714	0.60715	FALSE
CSRP2	0.0663479	0.347039	FALSE
CST1	0.100187	0.434066	FALSE
CST3	0.547368	0.531004	FALSE
CSTA	-0.195306	0.419392	FALSE
CSTB	0.539424	0.358191	FALSE
CSTF1	0.474748	0.279498	TRUE
CSTF2	0.423038	0.424692	TRUE
CSTF2T	0.633534	0.0407908	FALSE
CSTF3	0.173188	0.0790094	TRUE
CTBP1	0.440701	-0.0054079	TRUE
CTBP2	0.432317	0.599914	TRUE
CTBS	0.298749	0.222997	FALSE
CTCF	0.328773	0.336916	TRUE
CTDNEP1	0.384269	0.793939	FALSE
CTDP1	0.356408	0.335082	TRUE
CTDSP1	0.558387	0.209692	FALSE
CTDSPL	0.0538824	0.0952381	FALSE
CTDSPL2	0.423205	0.420229	FALSE
CTGF	0.0512713	0.763077	TRUE
CTH	0.385987	0.568419	FALSE
CTHRC1	-0.230396	0.698626	FALSE
CTIF	0.164864	0.174981	FALSE
CTNNA1	0.415627	0.196683	TRUE
CTNNAL1	0.387347	0.310647	TRUE
CTNNB1	0.258398	0.318164	TRUE
CTNNBIP1	0.363584	0.232843	FALSE
CTNNBL1	0.69595	0.551832	TRUE
CTNND1	0.463687	0.272473	TRUE
CTPS1	0.25723	0.197379	FALSE
CTPS2	0.55475	0.67642	FALSE
CTR9	0.191468	-0.169992	TRUE
CTSA	0.698465	0.623731	TRUE
CTSB	0.445942	0.505768	FALSE
CTSC	0.25321	0.348933	FALSE
CTSD	0.0219186	0.407737	FALSE
CTSE	0.407958	0.528832	FALSE
CTSG	0.0333869	0.106746	TRUE
CTSH	0.350764	0.412643	FALSE
CTSK	-0.138972	0.598119	FALSE
CTSL	-0.0557716	0.305845	FALSE
CTSS	-0.0377553	0.491138	FALSE
CTSZ	0.352816	0.340314	FALSE
CTTN	0.559087	0.208691	TRUE
CTTNBP2NL	0.495506	0.168349	FALSE
CTU1	-0.0352129	-0.133922	FALSE
CTU2	0.355278	-0.0428075	FALSE
CUEDC1	0.349818	-0.145579	FALSE
CUEDC2	0.392167	0.5	FALSE
CUL1	0.571371	0.320319	TRUE
CUL2	0.212997	0.259246	TRUE
CUL3	0.62742	0.3153	TRUE
CUL4A	0.794239	0.445664	TRUE
CUL4B	0.468351	0.5568	TRUE
CUL5	0.266502	0.167963	TRUE
CUTA	0.469825	0.473201	FALSE
CUTC	0.333482	0.382767	FALSE
CUX1	0.534127	0.21719	FALSE
CWC15	0.440329	0.147339	TRUE
CWC22	0.328487	0.000209952	TRUE
CWC25	0.590246	-0.0634291	FALSE
CWC27	0.420249	0.10963	TRUE
CWF19L1	0.37936	0.202282	FALSE
CXADR	0.572495	0.674553	FALSE
CXCL1	-0.0505623	0.471429	FALSE
CXCL10	0.101899	0.5	FALSE
CXCL12	0.145015	0.491803	FALSE
CXCL13	0.000476828	0.0629371	FALSE
CXCL14	0.198235	0.633276	FALSE
CXCL5	-0.139162	0.753846	FALSE
CXorf38	0.460179	0.557689	FALSE
CXorf56	0.448639	0.506638	FALSE
CXXC1	0.426378	0.255042	TRUE
CYB5A	0.500377	0.31974	FALSE
CYB5B	0.225466	0.509465	FALSE
CYB5R1	0.514954	0.549465	FALSE
CYB5R2	0.0486097	0.677001	FALSE
CYB5R3	0.0810597	0.563126	FALSE
CYB5R4	0.112277	0.280393	FALSE
CYBA	0.139765	0.354949	FALSE
CYBB	0.0105518	0.377823	FALSE
CYBRD1	-0.0815651	0.317438	FALSE
CYC1	0.479704	0.43047	FALSE
CYCS	0.198361	0.286002	TRUE
CYFIP1	0.688285	0.359486	TRUE
CYFIP2	0.510213	0.13952	FALSE
CYGB	0.0562984	0.590211	FALSE
CYHR1	0.759459	0.0492965	FALSE
CYLD	0.364273	0.214356	TRUE
CYP1B1	-0.134122	0.832967	FALSE
CYP20A1	0.260851	0.402953	FALSE
CYP27A1	0.163121	0.81609	FALSE
CYP2J2	0.497731	0.0945055	FALSE
CYP2S1	0.270133	0.49414	FALSE
CYP2W1	0.369929	0.837124	FALSE
CYP3A5	0.262644	0.592228	FALSE
CYP4F11	0.136107	0.362537	FALSE
CYP4F12	0.172136	0.388441	FALSE
CYP4F3	0.11928	0.528261	FALSE
CYP4X1	0.28097	1	FALSE
CYP51A1	0.277129	0.592331	FALSE
CYP7B1	-0.0495214	0.637263	FALSE
CYR61	-0.339848	0.496176	TRUE
CYSTM1	0.333748	0.642039	FALSE
CYTH1	0.506097	0.243597	FALSE
CYTH2	0.329483	0.0405138	FALSE
D2HGDH	0.057965	0.33361	FALSE
DAAM1	0.732706	0.209391	FALSE
DAAM2	-0.141779	0.426471	FALSE
DAB2	0.423694	0.541508	FALSE
DAB2IP	0.357385	0.255819	FALSE
DACH1	0.370883	0.604889	FALSE
DAD1	0.368365	0.0280351	TRUE
DAG1	0.258893	-0.209969	TRUE
DAGLB	0.616542	0.20821	FALSE
DAP	0.467313	0.395402	FALSE
DAP3	0.0841054	0.164624	TRUE
DAPK2	0.278122	0.790256	FALSE
DAPK3	0.233275	0.105694	FALSE
DARS	0.452679	0.34466	TRUE
DARS2	0.276484	0.546526	FALSE
DAXX	0.556485	0.536298	TRUE
DAZAP1	-0.0233069	0.0754546	FALSE
DAZAP2	0.36561	0.551376	FALSE
DBI	0.123178	0.0619383	FALSE
DBN1	0.0543975	0.535853	FALSE
DBNL	0.500272	0.42496	FALSE
DBR1	0.230146	0.180838	FALSE
DBT	0.519396	0.536609	FALSE
DCAF11	0.655206	0.197249	FALSE
DCAF13	0.727813	0.168803	FALSE
DCAF16	0.472759	0.5	FALSE
DCAF5	0.596615	-0.371429	FALSE
DCAF7	0.428853	0.0366706	FALSE
DCAF8	0.642855	0.279855	FALSE
DCAKD	0.32021	0.34565	FALSE
DCK	0.327235	0.336553	FALSE
DCN	0.0645407	0.497321	FALSE
DCP1A	0.58587	0.0633305	TRUE
DCP1B	0.460958	0.0839388	FALSE
DCPS	0.401476	0.602063	FALSE
DCTD	0.650628	0.685251	FALSE
DCTN1	0.229178	-0.0530706	TRUE
DCTN2	0.613989	0.406263	FALSE
DCTN3	0.527842	-0.106167	FALSE
DCTN4	0.650673	0.0377982	FALSE
DCTN5	0.391462	0.115783	FALSE
DCTN6	0.698115	0.352471	FALSE
DCTPP1	0.0806593	0.399966	FALSE
DCUN1D1	0.256868	0.289851	FALSE
DCUN1D3	0.380918	0.609781	FALSE
DCUN1D4	0.448	0.4	FALSE
DCUN1D5	0.285251	0.162888	FALSE
DCXR	0.392003	0.230505	FALSE
DDA1	0.260345	0.295283	FALSE
DDAH1	0.689284	0.279012	FALSE
DDAH2	0.298885	0.767971	FALSE
DDB1	0.282179	0.411643	TRUE
DDB2	-0.105681	0.63705	TRUE
DDC	0.360538	0.517609	FALSE
DDHD2	0.606619	0.188683	FALSE
DDI2	0.243128	0.22519	FALSE
DDOST	0.634792	0.29526	TRUE
DDR1	0.442665	0.374689	TRUE
DDRGK1	0.863085	0.287574	FALSE
DDT	0.438216	0.273047	FALSE
DDX1	0.166262	0.245492	TRUE
DDX10	0.579271	0.189915	FALSE
DDX17	0.406549	0.290668	TRUE
DDX18	0.255163	0.280373	FALSE
DDX19A	0.377174	0.287317	FALSE
DDX19B	0.397758	0.577846	FALSE
DDX20	0.536101	0.155208	TRUE
DDX21	0.360902	0.397119	TRUE
DDX23	0.42002	0.133247	TRUE
DDX24	0.70136	0.214397	FALSE
DDX27	0.831458	0.714755	TRUE
DDX28	0.20966	0.0662693	TRUE
DDX31	0.52878	0.205358	FALSE
DDX39A	0.217924	0.491973	TRUE
DDX39B	0.230635	0.27802	TRUE
DDX3X	0.218946	0.460948	TRUE
DDX41	0.46125	0.126094	TRUE
DDX42	0.516203	0.321504	TRUE
DDX46	0.325284	0.474639	TRUE
DDX47	0.734995	0.260926	FALSE
DDX49	0.23294	0.124619	FALSE
DDX5	0.378685	0.409611	TRUE
DDX50	0.165834	0.220652	FALSE
DDX51	0.254294	0.302698	FALSE
DDX52	0.64848	0.328471	FALSE
DDX54	0.351015	0.346404	FALSE
DDX55	0.462014	0.278939	FALSE
DDX56	0.541043	0.528393	FALSE
DDX58	0.19733	0.46576	TRUE
DDX59	0.327459	0.248927	FALSE
DDX6	0.28041	0.212005	TRUE
DDX60	0.455563	0.746699	FALSE
DECR1	0.535386	0.446922	FALSE
DECR2	0.440531	0.591802	FALSE
DEF6	0.350418	0.273744	FALSE
DEFA5	0.37125	0.509426	FALSE
DEFA6	0.470931	0.480941	FALSE
DEGS1	0.0226032	0.311966	FALSE
DEK	0.294265	0.31452	TRUE
DENND1A	0.333869	0.210302	FALSE
DENND2D	0.383692	0.745135	FALSE
DENND3	0.197724	0.427729	FALSE
DENND4C	0.604568	0.581091	FALSE
DENND6A	0.125745	0.212626	FALSE
DENR	0.285543	0.251092	FALSE
DEPTOR	0.677317	0.489418	FALSE
DERA	0.439601	0.0467659	FALSE
DERL1	0.783747	0.524695	TRUE
DERL2	0.499333	0.302198	TRUE
DERL3	0.163814	0.49334	FALSE
DES	0.0731796	0.616369	FALSE
DESI2	0.346802	0.6	FALSE
DFFA	0.530451	0.460054	FALSE
DFFB	0.380435	0.543999	FALSE
DFNA5	-0.0993578	0.621831	FALSE
DGAT1	0.632966	0.529709	FALSE
DGCR14	0.410019	0.609348	TRUE
DGKA	0.278063	0.511004	FALSE
DGKQ	0.449613	0.405519	FALSE
DGUOK	0.445575	-0.00454584	FALSE
DHCR24	0.523231	0.580912	FALSE
DHCR7	0.276572	0.641806	FALSE
DHFR	0.220654	0.385795	FALSE
DHODH	0.289614	0.333255	FALSE
DHPS	0.149045	0.520788	FALSE
DHRS1	0.179239	0.642889	FALSE
DHRS11	0.472966	0.546154	FALSE
DHRS3	0.240037	0.250847	FALSE
DHRS4	0.537389	0.410021	FALSE
DHRS4L2	0.644878	0.0110248	FALSE
DHRS7	0.549287	0.559326	FALSE
DHRS7B	0.533994	0.424904	FALSE
DHRS9	-0.225516	0.664313	FALSE
DHRSX	0.240329	0.0787879	FALSE
DHTKD1	0.0779384	0.250806	FALSE
DHX15	0.584216	0.0367883	TRUE
DHX16	0.463658	0.323588	TRUE
DHX29	0.321352	0.303579	FALSE
DHX30	0.367258	0.407294	TRUE
DHX32	0.465942	0.518612	FALSE
DHX33	0.476867	0.17265	FALSE
DHX35	0.840333	0.182143	TRUE
DHX36	0.532181	0.569713	FALSE
DHX37	0.159689	0.108492	FALSE
DHX38	0.370255	0.268564	TRUE
DHX40	0.588599	0.142857	FALSE
DHX57	0.428241	0.190636	FALSE
DHX8	0.467391	0.216648	TRUE
DHX9	0.401792	0.239608	TRUE
DIABLO	0.232621	-0.108874	FALSE
DIAPH1	0.333835	0.393072	TRUE
DIAPH2	0.45688	0.714087	FALSE
DICER1	0.589546	0.208022	TRUE
DIDO1	0.663567	0.414021	FALSE
DIEXF	0.594203	0.363598	FALSE
DIMT1	0.624445	0.554695	FALSE
DIP2A	0.361656	0.0547046	FALSE
DIP2B	0.444052	0.160131	FALSE
DIP2C	0.0396138	0.434994	FALSE
DIS3	0.552199	0.416935	TRUE
DIS3L2	0.29128	0.0908862	FALSE
DKC1	0.625148	0.175454	FALSE
DLAT	0.524037	0.417989	FALSE
DLD	0.404779	0.278155	TRUE
DLG1	0.415933	0.561948	TRUE
DLG3	0.297514	0.357388	FALSE
DLG4	0.157308	-0.160234	TRUE
DLGAP4	0.409434	0.265344	FALSE
DLST	0.736281	0.463887	TRUE
DMAP1	0.200111	0.157696	TRUE
DMBT1	0.298587	0.713991	FALSE
DMD	0.0314794	0.515414	FALSE
DMPK	0.0206508	0.309877	FALSE
DMTN	0.780792	0.342199	TRUE
DNAJA1	0.258489	0.299114	FALSE
DNAJA2	0.300645	0.460182	FALSE
DNAJA3	0.429687	0.477728	FALSE
DNAJA4	0.629083	0.41446	FALSE
DNAJB1	0.340545	0.353318	TRUE
DNAJB11	0.185421	0.409967	FALSE
DNAJB12	0.463357	0.331833	FALSE
DNAJB14	0.602778	0.298586	FALSE
DNAJB2	0.646109	0.304295	FALSE
DNAJB4	-0.0363292	0.429691	FALSE
DNAJB5	-0.138928	0.651619	FALSE
DNAJB6	0.399889	0.310686	FALSE
DNAJC1	0.153084	0.555632	FALSE
DNAJC10	0.33282	0.435934	FALSE
DNAJC11	0.401854	0.443422	TRUE
DNAJC12	0.175458	0.5	FALSE
DNAJC13	0.295704	0.197121	FALSE
DNAJC15	0.334867	0.0956717	FALSE
DNAJC16	0.675622	0.491924	FALSE
DNAJC17	0.607922	0.424786	FALSE
DNAJC19	0.372067	0.125271	FALSE
DNAJC2	0.457565	0.45865	FALSE
DNAJC21	0.571774	0.51032	FALSE
DNAJC25	0.399788	0.381392	FALSE
DNAJC3	0.514565	0.620824	TRUE
DNAJC30	0.43595	0.306648	FALSE
DNAJC5	0.83289	0.375727	FALSE
DNAJC7	0.368207	0.559437	TRUE
DNAJC8	0.247695	0.30959	TRUE
DNAJC9	0.299526	0.48579	FALSE
DNASE1L1	0.242829	1	FALSE
DNASE2	0.087503	0.43093	FALSE
DNM1	0.0553194	-0.0747579	FALSE
DNM1L	0.500938	0.397371	TRUE
DNM2	0.256419	0.286574	TRUE
DNMBP	0.32665	0.316264	FALSE
DNMT1	0.168824	0.299552	TRUE
DNPEP	0.55556	0.385791	FALSE
DNPH1	0.224594	0.126683	FALSE
DNTTIP1	0.611661	0.135296	TRUE
DNTTIP2	0.559222	0.16628	TRUE
DOCK1	0.225533	0.513767	TRUE
DOCK10	-0.0483692	0.188261	FALSE
DOCK11	0.0499767	0.521304	FALSE
DOCK2	-0.0337879	0.454738	TRUE
DOCK5	0.585159	0.287424	FALSE
DOCK6	0.280344	0.239271	FALSE
DOCK7	0.445306	0.199549	TRUE
DOCK8	0.182311	0.336294	TRUE
DOCK9	0.542767	0.556371	FALSE
DOHH	0.112713	0.167282	FALSE
DOK1	0.488521	0.215282	FALSE
DOK2	0.0413633	0.463337	FALSE
DOK3	-0.156399	0.493628	FALSE
DOK4	0.40547	0.4	FALSE
DOLPP1	0.411047	0.413528	FALSE
DOPEY2	0.136935	0.39485	FALSE
DPAGT1	0.38296	0.320931	FALSE
DPCD	0.34186	0.502313	FALSE
DPEP1	0.310955	0.778312	FALSE
DPF2	0.391374	-0.0420041	TRUE
DPH1	0.422909	0.130109	FALSE
DPH2	0.477083	0.224556	FALSE
DPH5	0.590489	0.141929	FALSE
DPH6	0.434683	0.657306	FALSE
DPM1	0.498708	-0.117338	TRUE
DPM3	-0.0654658	0.136478	TRUE
DPP3	0.360499	0.268015	FALSE
DPP4	0.00209818	0.650255	TRUE
DPP7	0.313154	0.046211	FALSE
DPP9	0.272649	0.227331	FALSE
DPT	-0.125239	0.2685	FALSE
DPY19L1	0.406274	0.26005	FALSE
DPY30	0.192895	0.122084	TRUE
DPYD	-0.19082	0.444288	FALSE
DPYSL2	0.418311	0.468547	FALSE
DPYSL3	-0.0177191	0.616057	FALSE
DR1	0.53676	0.289123	TRUE
DRAP1	0.194593	0.0511415	TRUE
DRG1	0.410285	0.254536	FALSE
DRG2	0.440388	0.41532	FALSE
DSC2	0.472148	0.719764	FALSE
DSCC1	0.58555	0.462561	TRUE
DSCR3	0.614513	0.0385712	FALSE
DSG2	0.321186	0.629761	FALSE
DSN1	0.448958	0.206191	FALSE
DSP	0.492551	0.469827	FALSE
DST	0.308309	0.436769	FALSE
DSTN	0.655991	0.465077	FALSE
DTD1	0.677622	0.436766	FALSE
DTNA	0.114159	0.526838	TRUE
DTNBP1	0.687221	0.198435	TRUE
DTWD1	0.67784	-0.3	FALSE
DTWD2	0.58919	0.341299	FALSE
DTX2	0.251924	0.254545	FALSE
DTX3L	0.14672	0.462729	TRUE
DTYMK	0.110999	0.455548	FALSE
DUOX2	0.187483	0.607756	FALSE
DUS1L	0.539625	0.224725	FALSE
DUS2	0.175078	0.337077	FALSE
DUS3L	0.205958	0.311236	FALSE
DUSP11	0.240539	0.248509	FALSE
DUSP12	0.335511	0.2885	FALSE
DUSP22	0.452789	0.43548	FALSE
DUSP23	0.104966	0.125287	FALSE
DUSP3	0.398376	0.449665	FALSE
DUT	0.646837	0.552055	FALSE
DVL2	0.265614	0.422395	TRUE
DVL3	0.181526	0.175375	FALSE
DYM	0.542768	0.0239658	FALSE
DYNC1H1	0.295093	0.315764	TRUE
DYNC1I2	0.29035	0.096431	FALSE
DYNC1LI1	0.0594667	0.385593	TRUE
DYNC1LI2	0.350883	0.165378	FALSE
DYNLL1	0.0274995	0.274011	TRUE
DYNLL2	0.611435	0.437177	TRUE
DYNLRB1	0.71526	-0.0210263	TRUE
DYNLT1	0.178835	0.0477971	TRUE
DYNLT3	0.241318	0.522448	TRUE
DYRK1A	0.410592	0.220319	FALSE
DYSF	-0.160646	0.364179	TRUE
E2F4	0.505226	0.461561	TRUE
EAF1	0.608743	0.349451	TRUE
EAPP	0.312629	0.151845	FALSE
EARS2	0.291668	0.28953	FALSE
EBAG9	0.739673	0.59547	FALSE
EBNA1BP2	0.278235	0.0486275	TRUE
EBP	0.26902	0.3881	FALSE
ECD	0.241782	-0.0147059	FALSE
ECE1	0.194992	0.228898	FALSE
ECE2	0.374483	0.565934	FALSE
ECH1	0.29192	0.692762	FALSE
ECHDC1	0.423952	0.540063	FALSE
ECHDC2	0.198259	0.229288	FALSE
ECHS1	0.590038	0.459075	FALSE
ECI1	0.324378	0.163871	FALSE
ECI2	0.0321784	0.712638	FALSE
ECM1	0.398109	0.378883	FALSE
ECSIT	0.103601	0.14843	TRUE
ECT2	0.504276	0.483146	TRUE
EDC3	0.608775	0.647906	TRUE
EDC4	0.408934	0.360793	TRUE
EDEM3	0.51113	0.120005	FALSE
EDF1	0.331487	0.262496	FALSE
EDIL3	0.072623	0.285714	FALSE
EEA1	0.274195	0.612477	TRUE
EED	0.363394	0.1867	TRUE
EEF1A1	0.151439	0.149467	TRUE
EEF1B2	0.341189	0.11107	FALSE
EEF1D	0.407569	0.490246	FALSE
EEF1E1	0.354466	0.283055	TRUE
EEF1G	0.169589	-0.00813226	FALSE
EEF2	0.388081	0.0752199	TRUE
EEF2K	0.375724	0.22725	FALSE
EEFSEC	0.383233	0.32487	FALSE
EEPD1	0.329341	0.569436	FALSE
EFCAB14	0.426767	-0.187719	FALSE
EFEMP1	-0.186764	0.465203	FALSE
EFEMP2	0.115238	0.498596	FALSE
EFHD2	0.284064	0.23676	FALSE
EFNA1	0.355708	0.5	FALSE
EFNB1	0.448362	0.231395	TRUE
EFNB2	0.332914	0.456275	FALSE
EFR3A	0.689424	0.240329	FALSE
EFTUD2	0.465451	0.279788	TRUE
EGFL7	0.252022	0.35708	FALSE
EGFR	0.224604	-0.0604983	TRUE
EGLN1	0.470515	0.47393	TRUE
EHBP1	0.278981	0.351094	TRUE
EHBP1L1	0.220577	0.197877	FALSE
EHD1	0.339027	0.526912	FALSE
EHD2	0.0797999	0.175813	FALSE
EHD3	-0.188491	0.32996	FALSE
EHD4	0.545369	0.745217	FALSE
EHF	0.250332	0.2	FALSE
EHHADH	0.429891	0.834222	FALSE
EHMT1	0.496203	0.133	TRUE
EHMT2	0.518053	0.159623	TRUE
EI24	0.368222	0.259412	FALSE
EIF1	0.57969	0.298887	FALSE
EIF1AD	0.530827	0.0157159	FALSE
EIF1AX	0.255421	0.404534	FALSE
EIF1B	0.338932	0.329404	FALSE
EIF2A	0.259535	0.220307	FALSE
EIF2AK2	0.22381	0.468681	FALSE
EIF2B1	0.376015	0.521681	TRUE
EIF2B2	0.480522	0.0844617	TRUE
EIF2B3	0.277564	0.195134	TRUE
EIF2B4	0.650765	0.048077	TRUE
EIF2B5	0.570506	0.226428	TRUE
EIF2D	0.359874	0.617643	FALSE
EIF2S1	0.670299	0.500428	TRUE
EIF2S2	0.42711	0.17579	TRUE
EIF2S3	0.512673	-0.0603464	TRUE
EIF3A	0.70166	0.411878	TRUE
EIF3B	0.678965	0.183083	TRUE
EIF3C	0.261233	-0.0331657	TRUE
EIF3D	0.463339	0.103253	TRUE
EIF3E	0.66041	0.178039	TRUE
EIF3F	0.475514	0.00576809	TRUE
EIF3G	0.251746	0.0812241	TRUE
EIF3H	0.747123	0.319081	TRUE
EIF3I	0.4413	0.261549	TRUE
EIF3J	0.587201	0.563228	TRUE
EIF3K	0.141387	0.132296	TRUE
EIF3L	0.451023	0.278145	TRUE
EIF3M	0.161558	0.0752237	TRUE
EIF4A1	0.595157	0.225976	TRUE
EIF4A2	0.18788	0.31741	FALSE
EIF4A3	0.632828	0.408649	TRUE
EIF4B	0.50827	0.374778	FALSE
EIF4E	0.471435	0.0755378	TRUE
EIF4E2	0.175258	-0.0931605	FALSE
EIF4E3	0.228158	0.43423	FALSE
EIF4EBP1	0.526139	0.608237	FALSE
EIF4EBP2	0.336387	0.40592	FALSE
EIF4EBP3	0.0150794	0.4	FALSE
EIF4ENIF1	0.26594	-0.073074	TRUE
EIF4G1	0.184899	0.108418	TRUE
EIF4G2	0.0604664	0.276133	FALSE
EIF4G3	0.256743	0.196982	FALSE
EIF4H	0.522279	0.636077	FALSE
EIF5	0.593387	0.524586	FALSE
EIF5A	0.288384	0.606908	FALSE
EIF5A2	0.229473	0.476358	FALSE
EIF5B	0.340685	0.305787	FALSE
EIF6	0.474699	0.60242	TRUE
ELAC2	0.530418	0.161234	FALSE
ELAVL1	0.185196	0.198409	TRUE
ELF1	0.673325	0.0739235	FALSE
ELF2	0.302312	-0.690476	FALSE
ELF3	0.366224	0.344473	FALSE
ELL	0.239269	-0.27033	TRUE
ELMO1	-0.103548	0.306183	TRUE
ELMO2	0.59042	0.202976	FALSE
ELMO3	0.306066	0.377833	FALSE
ELMOD2	0.544936	0.287005	FALSE
ELMSAN1	0.362673	0.0452095	TRUE
ELN	0.0417062	0.243513	TRUE
ELOF1	0.197665	0.140578	FALSE
ELOVL1	0.431055	0.438697	FALSE
ELOVL5	0.340327	0.381818	FALSE
ELP2	0.585521	0.141098	TRUE
ELP3	0.915861	0.488925	TRUE
ELP4	0.510816	0.266473	TRUE
ELP5	0.582474	0.563636	FALSE
ELP6	0.100497	0.32198	FALSE
EMB	0.161097	0.540373	FALSE
EMC1	0.220752	0.279805	FALSE
EMC10	-0.0577636	-0.116006	FALSE
EMC2	0.783261	-0.0509742	FALSE
EMC3	0.0868067	0.0819957	FALSE
EMC4	0.713789	-0.0246156	FALSE
EMC6	0.183565	0.0370107	FALSE
EMC7	0.588481	0.206075	FALSE
EMC8	0.246752	0.0328487	FALSE
EMC9	0.506356	-0.5	FALSE
EMD	0.494472	0.637052	TRUE
[truncated: 5,369 more rows]

## Sheet: S2C.BRCA.corr.table
S2C. Spearman's DNA-RNA Corr and RNA-Pro Corr for each gene in BRCA
gene	DNA-RNA Corr	RNA-Pro Corr	CORUM complex
A1BG	0.255283	0.0721898	FALSE
A2M	-0.014522	0.399044	TRUE
A2ML1	0.105677	0.672538	FALSE
AAAS	0.441672	0.0733492	FALSE
AACS	0.16445	0.595594	FALSE
AADAT	-0.0619178	0.499002	FALSE
AAED1	0.252461	0.131346	FALSE
AAGAB	0.470806	0.642146	FALSE
AAK1	0.31361	0.410207	FALSE
AAMDC	0.437362	0.599963	FALSE
AAMP	0.388755	0.432835	FALSE
AAR2	0.537992	0.40677	FALSE
AARS	0.692769	0.746561	FALSE
AARS2	0.424937	0.228511	FALSE
AARSD1	0.515972	0.460124	FALSE
AASDHPPT	0.558781	0.510712	FALSE
AASS	0.0416574	0.683499	FALSE
AATF	0.546721	0.279621	FALSE
ABAT	0.523514	0.91111	FALSE
ABCA1	0.242528	0.176295	FALSE
ABCA12	0.245374	0.460199	FALSE
ABCA13	0.0402813	-0.260683	FALSE
ABCA2	0.392837	0.234002	FALSE
ABCA3	0.444615	0.628042	FALSE
ABCA6	-0.14453	-0.0200952	FALSE
ABCA8	-0.153083	0.248053	FALSE
ABCB1	-0.233771	0.106189	TRUE
ABCB10	0.49317	0.274545	FALSE
ABCB5	0.0205914	0.125658	FALSE
ABCB6	0.263866	0.45386	FALSE
ABCB8	0.371181	0.0592325	FALSE
ABCC1	0.240281	0.300214	FALSE
ABCC10	0.411249	-0.0266507	FALSE
ABCC11	0.253471	0.494981	FALSE
ABCC2	0.256398	0.166738	FALSE
ABCC3	0.0872218	0.0768352	FALSE
ABCC4	0.235697	0.521361	FALSE
ABCC5	0.329349	0.454245	FALSE
ABCD3	0.337669	0.4095	FALSE
ABCE1	0.318854	0.53121	FALSE
ABCF1	0.598228	0.550365	FALSE
ABCF2	0.59073	0.672514	FALSE
ABCF3	0.535561	0.359146	FALSE
ABCG1	-0.0477536	0.62646	FALSE
ABHD10	0.448162	0.489147	FALSE
ABHD11	0.38652	0.635469	FALSE
ABHD12	0.201053	0.451135	FALSE
ABHD13	0.723027	0.347852	FALSE
ABHD14B	0.441584	0.346794	FALSE
ABHD16A	0.484636	0.435659	FALSE
ABHD17A	0.232137	0.125047	FALSE
ABHD17B	0.567277	0.298852	FALSE
ABHD17C	0.366548	0.713396	FALSE
ABHD3	0.157613	0.252087	FALSE
ABHD4	0.484931	0.518044	FALSE
ABHD5	0.251031	0.305712	FALSE
ABHD6	0.365976	0.510096	FALSE
ABI1	0.603701	0.341157	TRUE
ABI2	0.274871	0.548353	FALSE
ABI3	-0.0774212	0.488781	TRUE
ABI3BP	-0.126758	0.798056	FALSE
ABL1	0.488892	0.532425	TRUE
ABLIM1	0.464757	0.745748	FALSE
ABLIM2	0.320094	0.622604	FALSE
ABLIM3	0.539896	0.842172	FALSE
ABR	0.445396	0.166304	FALSE
ABRACL	0.517341	0.614356	FALSE
ABT1	0.490162	0.383823	FALSE
ABTB1	0.37323	0.351763	FALSE
ABTB2	0.393365	0.472611	FALSE
ACAA1	0.4651	0.51355	FALSE
ACAA2	0.51822	0.669342	FALSE
ACACA	0.359433	0.690543	FALSE
ACACB	0.11152	0.663213	FALSE
ACAD10	0.291856	0.261664	FALSE
ACAD11	0.402409	0.199614	FALSE
ACAD8	0.669225	0.663857	TRUE
ACAD9	0.487967	0.214777	FALSE
ACADL	0.0414058	0.597527	FALSE
ACADM	0.430389	0.649192	FALSE
ACADS	0.223886	0.676447	FALSE
ACADSB	0.213245	0.870715	FALSE
ACADVL	0.402836	0.332538	FALSE
ACAN	0.151395	0.589787	FALSE
ACAP1	-0.0393219	0.661074	TRUE
ACAP2	0.200259	0.411926	FALSE
ACAP3	0.248397	0.358138	FALSE
ACAT1	0.405134	0.667419	FALSE
ACAT2	0.548181	0.64636	FALSE
ACBD3	0.447025	0.316102	FALSE
ACBD5	0.337622	0.357737	FALSE
ACBD6	0.747565	0.423141	FALSE
ACBD7	0.295561	0.738264	FALSE
ACCS	0.105655	-0.136171	FALSE
ACD	0.407036	0.257512	TRUE
ACE	0.0939496	0.583794	FALSE
ACIN1	0.364379	0.161329	TRUE
ACLY	0.382448	0.487042	FALSE
ACO1	0.219991	0.750008	FALSE
ACO2	0.388749	0.469349	FALSE
ACOT1	0.286457	0.730468	FALSE
ACOT11	0.280033	0.67767	FALSE
ACOT13	0.51001	0.306594	FALSE
ACOT2	0.37329	0.264259	FALSE
ACOT4	0.225848	0.304523	FALSE
ACOT7	0.126969	0.750625	FALSE
ACOT8	0.41536	0.424111	FALSE
ACOX1	0.508176	0.120261	FALSE
ACOX3	0.498558	0.676071	FALSE
ACP1	0.537503	0.298654	FALSE
ACP2	0.406111	0.233425	FALSE
ACP5	0.00722345	0.501423	FALSE
ACP6	0.268651	0.730534	FALSE
ACPP	-0.0662057	0.697735	FALSE
ACSF2	0.265761	0.763524	FALSE
ACSF3	0.430362	0.398224	FALSE
ACSL1	0.395033	0.805058	FALSE
ACSL3	0.330501	0.598765	FALSE
ACSL5	0.307094	0.69393	FALSE
ACSM1	0.335846	0.392576	FALSE
ACSM3	0.230392	0.394118	FALSE
ACSS1	0.0379668	0.624064	FALSE
ACSS2	0.410411	0.636906	FALSE
ACSS3	0.239043	0.90006	FALSE
ACTA1	0.0461086	0.274047	FALSE
ACTA2	-0.153699	0.787657	TRUE
ACTB	0.485917	0.564135	TRUE
ACTBL2	-0.145732	0.122932	FALSE
ACTG1	0.410165	0.00188024	TRUE
ACTG2	0.208	0.316839	TRUE
ACTL6A	0.582427	0.413466	TRUE
ACTL8	0.0843677	0.550314	FALSE
ACTN1	0.263195	0.324197	TRUE
ACTN2	0.0933518	0.0284653	FALSE
ACTN3	0.101698	0.0871497	FALSE
ACTN4	0.457111	0.236365	TRUE
ACTR1A	0.547703	0.205674	FALSE
ACTR1B	0.537375	0.44109	FALSE
ACTR2	0.546052	0.442666	TRUE
ACTR3	0.40766	0.408752	TRUE
ACTR3B	0.577151	0.223729	FALSE
ACTR3C	0.411869	0.160268	FALSE
ACTR5	0.49088	0.364311	TRUE
ACTR6	0.329276	0.107868	TRUE
ACTR8	0.567285	0.375252	TRUE
ACVR1	0.349255	0.604769	FALSE
ACY1	0.619261	0.687284	FALSE
ACYP1	0.310108	0.608356	FALSE
ACYP2	0.197691	0.220624	FALSE
ADA	0.352508	0.660182	TRUE
ADAL	0.392311	0.492225	FALSE
ADAM10	0.591631	0.50376	FALSE
ADAM12	0.0120892	0.722109	TRUE
ADAM15	0.174023	0.317203	TRUE
ADAM17	0.674378	0.188599	FALSE
ADAM8	0.169474	0.227098	TRUE
ADAM9	0.446908	0.635835	TRUE
ADAMDEC1	0.0225125	0.279772	FALSE
ADAMTS1	0.147066	0.365703	FALSE
ADAMTS12	-0.0664748	0.744109	FALSE
ADAMTS15	-0.0507897	0.754815	FALSE
ADAMTS16	-0.0626457	0.0870974	FALSE
ADAMTS2	0.09282	0.692048	FALSE
ADAMTS4	0.182311	0.372272	FALSE
ADAMTS7	-0.150344	0.46288	FALSE
ADAMTSL1	-0.138629	0.43268	FALSE
ADAMTSL2	0.069581	0.492923	FALSE
ADAMTSL3	0.437013	0.523996	FALSE
ADAP1	0.280235	0.232406	FALSE
ADAP2	0.279601	0.304252	FALSE
ADAR	0.48445	0.662947	TRUE
ADARB1	0.457063	0.57735	FALSE
ADARB2	-0.0247319	-0.160788	FALSE
ADAT1	0.59866	0.340668	FALSE
ADAT2	0.23021	0.309641	FALSE
ADAT3	0.458167	0.0570714	FALSE
ADCK1	0.448463	0.128568	FALSE
ADCK5	0.777616	0.407302	FALSE
ADCY3	0.300677	0.0406657	FALSE
ADCY5	-0.0896241	0.267682	FALSE
ADCY6	0.403684	0.298051	FALSE
ADCY7	0.249894	0.00486965	FALSE
ADCY9	0.431411	0.461093	FALSE
ADD1	0.589218	0.186038	FALSE
ADD2	0.268865	0.515182	TRUE
ADD3	0.0527061	0.71008	FALSE
ADGB	0.1	0.8	FALSE
ADH1B	0.0981502	0.808584	FALSE
ADH1C	0.183721	0.579484	FALSE
ADH5	0.289793	0.472409	FALSE
ADHFE1	0.281229	0.186111	FALSE
ADI1	0.38519	0.574603	FALSE
ADIPOQ	0.0249982	0.403659	TRUE
ADIPOR1	0.503603	0.423596	FALSE
ADIRF	-0.00212279	0.788329	FALSE
ADK	0.448424	0.47917	FALSE
ADNP	0.306822	0.411303	FALSE
ADNP2	0.428023	0.333713	FALSE
ADO	0.649132	0.447605	FALSE
ADPGK	0.494648	0.376766	FALSE
ADPRH	0.254382	0.527737	FALSE
ADPRHL2	0.719764	0.424883	FALSE
ADRM1	0.379511	0.038748	FALSE
ADSL	0.607248	0.572528	FALSE
ADSS	0.447876	0.675873	FALSE
ADSSL1	0.385782	0.774727	FALSE
AEBP1	0.221771	0.709076	FALSE
AES	0.426869	0.286375	FALSE
AFAP1	0.320085	0.567386	FALSE
AFAP1L1	-0.0548174	0.542443	FALSE
AFAP1L2	0.150266	0.747608	FALSE
AFF1	0.415054	0.344545	TRUE
AFF3	-0.0715198	0.741057	FALSE
AFF4	0.444156	-0.0492187	TRUE
AFG3L2	0.652737	0.445495	TRUE
AFM	0.0357143	0.336364	FALSE
AFMID	0.267422	0.528761	FALSE
AFTPH	0.143374	0.665661	FALSE
AGA	0.392113	0.541352	FALSE
AGAP1	0.324661	0.423571	FALSE
AGAP2	-0.0810025	0.0248186	FALSE
AGAP3	0.332183	0.338803	FALSE
AGFG1	0.522985	0.656162	FALSE
AGFG2	0.206541	0.622736	FALSE
AGGF1	0.707716	0.46059	FALSE
AGK	0.627086	0.416871	FALSE
AGL	0.28574	0.721962	FALSE
AGMAT	0.443846	0.642857	FALSE
AGO1	0.48484	0.0967945	FALSE
AGO2	0.692135	0.504516	TRUE
AGO3	0.448179	0.0920098	FALSE
AGO4	0.458545	0.217588	TRUE
AGPAT1	0.407429	0.0500712	FALSE
AGPAT2	0.391349	0.547405	FALSE
AGPAT3	0.436665	0.315805	FALSE
AGPAT5	0.578248	0.497411	FALSE
AGPS	0.0181555	0.617614	TRUE
AGR2	0.098343	0.859122	FALSE
AGR3	-0.0179958	0.874432	FALSE
AGRN	0.0435111	0.282733	FALSE
AGT	0.113289	0.150833	TRUE
AGTPBP1	0.37466	0.544777	FALSE
AGTRAP	0.421682	0.345503	FALSE
AHCTF1	0.557182	0.27094	FALSE
AHCY	0.483852	0.597391	FALSE
AHCYL1	0.438326	0.747321	FALSE
AHCYL2	0.246223	0.507853	FALSE
AHDC1	0.442799	0.603676	FALSE
AHNAK	-0.00771418	0.703661	TRUE
AHNAK2	0.104736	0.698289	FALSE
AHR	0.151506	0.634719	TRUE
AHSA1	0.333632	0.744433	FALSE
AHSG	-0.0650155	-0.481203	FALSE
AHSP	-0.0205297	-0.0564248	FALSE
AIDA	0.477963	0.375384	FALSE
AIF1	0.0187733	0.636718	FALSE
AIF1L	0.254979	0.867742	FALSE
AIFM2	0.246276	0.273649	FALSE
AIFM3	0.350939	0.0641837	FALSE
AIM1	0.370735	0.800397	FALSE
AIMP2	0.592349	0.10174	TRUE
AIP	0.546525	0.539071	FALSE
AJUBA	0.347299	0.534631	TRUE
AK1	0.29394	0.40863	FALSE
AK2	0.696709	0.345532	FALSE
AK3	0.514928	0.455036	FALSE
AK4	0.270328	0.848841	FALSE
AK5	-0.0734554	0.615036	FALSE
AKAP1	0.472103	0.711963	TRUE
AKAP10	0.56296	0.583629	FALSE
AKAP11	0.568373	0.258314	FALSE
AKAP12	-0.0750718	0.870108	FALSE
AKAP13	0.555933	0.560583	TRUE
AKAP5	0.34018	0.718248	TRUE
AKAP7	0.49185	0.492996	FALSE
AKAP8	0.168454	0.137542	FALSE
AKAP8L	0.205109	0.267374	TRUE
AKAP9	0.204402	0.447342	TRUE
AKNA	0.238575	0.234693	FALSE
AKR1A1	0.56636	0.404404	FALSE
AKR1B1	0.228089	0.57537	FALSE
AKR1B10	0.0402911	0.702796	FALSE
AKR1B15	0.14821	0.144947	FALSE
AKR1C1	0.192261	0.758748	FALSE
AKR1C2	0.0655933	0.720481	FALSE
AKR1C3	-0.00148113	0.799148	FALSE
AKR1E2	0.304882	0.0118102	FALSE
AKR7A2	0.205054	0.493453	FALSE
AKR7A3	0.200802	0.700686	FALSE
AKT1	0.535873	0.610002	TRUE
AKT1S1	0.154765	0.122944	FALSE
AKT2	0.347997	0.425671	TRUE
AKT3	0.0546747	0.673394	FALSE
AKTIP	0.633144	0.556323	TRUE
ALAD	0.531056	0.609743	FALSE
ALAS1	0.258652	0.157796	FALSE
ALB	0.125597	0.117468	FALSE
ALCAM	0.0845762	0.854483	FALSE
ALDH16A1	0.119949	0.306375	FALSE
ALDH18A1	0.394437	0.548557	FALSE
ALDH1A1	0.112433	0.784139	FALSE
ALDH1A2	0.0964685	0.755054	FALSE
ALDH1A3	0.353717	0.717323	FALSE
ALDH1B1	0.149565	0.544612	FALSE
ALDH1L1	0.115458	0.623636	FALSE
ALDH1L2	-0.171363	0.786267	FALSE
ALDH2	0.148465	0.754928	FALSE
ALDH3A2	0.394249	0.74553	FALSE
ALDH3B1	0.314641	0.437146	FALSE
ALDH4A1	0.153169	0.819386	FALSE
ALDH5A1	0.285444	0.830838	FALSE
ALDH6A1	0.422523	0.822226	FALSE
ALDH7A1	0.0802607	0.43113	FALSE
ALDH9A1	0.513088	0.770977	FALSE
ALDOA	0.46252	0.445901	FALSE
ALDOB	0.168215	0.0946276	FALSE
ALDOC	0.216304	0.601924	FALSE
ALG1	0.421408	0.258802	FALSE
ALG11	0.641677	0.279772	FALSE
ALG12	0.443002	0.0916366	FALSE
ALG2	0.659149	0.357431	FALSE
ALG5	0.592515	0.434216	FALSE
ALG6	0.31864	0.169582	FALSE
ALG8	0.595847	0.264442	FALSE
ALG9	0.476129	0.0822316	FALSE
ALKBH1	0.64326	0.384719	FALSE
ALKBH2	0.314826	0.52317	FALSE
ALKBH3	0.45713	0.521491	FALSE
ALKBH4	0.568855	0.257138	FALSE
ALKBH5	0.453413	0.430804	FALSE
ALKBH6	0.306549	0.233285	FALSE
ALKBH7	0.0903936	0.110095	FALSE
ALKBH8	0.281777	0.627627	FALSE
ALMS1	0.220422	0.318256	FALSE
ALOX12B	0.141176	0.027025	FALSE
ALOX15B	-0.0378678	0.611941	FALSE
ALOX5	0.0341947	0.623748	FALSE
ALOXE3	-0.00497185	-0.115291	FALSE
ALPK1	0.307784	0.353704	FALSE
ALPL	0.0872837	0.561557	FALSE
ALS2	0.498531	0.12943	FALSE
ALYREF	0.572994	0.262794	TRUE
AMACR	0.0608646	0.461987	FALSE
AMBP	0.413356	0.080556	FALSE
AMBRA1	0.473315	0.193667	FALSE
AMDHD1	0.117553	0.532105	FALSE
AMDHD2	0.330981	0.316379	FALSE
AMFR	0.0834435	0.29915	TRUE
AMN1	0.142253	0.173098	FALSE
AMOTL1	0.268612	0.674398	TRUE
AMOTL2	0.236765	0.437309	TRUE
AMPD2	0.39236	0.295977	FALSE
AMPD3	0.0742855	0.626717	FALSE
AMPH	0.164913	0.813508	FALSE
AMZ2	0.79085	0.207856	FALSE
ANAPC1	0.542082	0.349067	TRUE
ANAPC10	0.0547115	0.356643	TRUE
ANAPC11	0.501837	0.182184	FALSE
ANAPC13	0.308713	0.147916	FALSE
ANAPC15	0.49908	0.252747	FALSE
ANAPC16	0.196578	0.0766933	FALSE
ANAPC2	0.471577	0.259977	TRUE
ANAPC4	0.328049	-0.0775128	TRUE
ANAPC5	0.476626	0.0135913	TRUE
ANAPC7	0.606273	0.202858	TRUE
ANG	0.303801	0.334338	TRUE
ANGEL2	0.560856	0.604317	FALSE
ANGPT2	0.179749	0.266588	FALSE
ANGPTL2	0.145151	0.649687	FALSE
ANGPTL4	0.227422	0.71259	TRUE
ANK1	0.109683	0.178193	FALSE
ANK2	0.079272	0.171216	FALSE
ANK3	0.332789	0.169615	TRUE
ANKFY1	0.528298	0.446103	FALSE
ANKIB1	0.563365	0.328993	FALSE
ANKK1	0.260306	-0.0648585	FALSE
ANKLE2	0.474255	0.400796	FALSE
ANKMY2	0.412146	0.75202	FALSE
ANKRD10	0.538568	0.486609	FALSE
ANKRD11	0.5037	0.200878	TRUE
ANKRD12	0.270475	0.128694	FALSE
ANKRD13A	0.370661	0.574092	FALSE
ANKRD13C	0.498399	0.363431	FALSE
ANKRD13D	0.548917	0.268227	FALSE
ANKRD16	0.71978	0.162406	FALSE
ANKRD17	0.522281	0.551003	FALSE
ANKRD18A	-0.0160354	-0.00768717	FALSE
ANKRD22	-0.0734156	0.597109	FALSE
ANKRD26	0.303121	0.28383	FALSE
ANKRD27	0.423876	0.690074	FALSE
ANKRD28	0.53371	0.675859	TRUE
ANKRD30A	-0.128046	0.368633	FALSE
ANKRD30B	0.013884	-0.0544233	FALSE
ANKRD31	0.366212	-0.125884	FALSE
ANKRD39	0.444127	0.0713033	FALSE
ANKRD40	0.676164	0.649995	FALSE
ANKRD44	0.115056	0.551393	FALSE
ANKRD46	0.508728	0.195913	FALSE
ANKRD49	0.634982	0.470678	FALSE
ANKRD50	0.47173	0.740184	FALSE
ANKRD52	0.383905	0.29999	FALSE
ANKRD54	0.46646	0.272769	FALSE
ANKS1A	0.421919	0.374294	FALSE
ANKS3	0.495833	0.109613	FALSE
ANKZF1	0.382923	0.28009	FALSE
ANLN	0.165447	0.801693	FALSE
ANO1	0.305592	0.752963	FALSE
ANO10	0.368453	0.493869	FALSE
ANO5	0.104446	0.149263	FALSE
ANO6	0.143342	0.339508	FALSE
ANO8	0.281903	0.135911	FALSE
ANP32A	0.481525	0.546833	TRUE
ANP32B	0.32235	0.384854	TRUE
ANP32E	0.413814	0.792863	FALSE
ANPEP	0.0473654	0.702398	FALSE
ANTXR1	0.0450905	0.766234	FALSE
ANTXR2	0.149991	0.320466	FALSE
ANXA1	0.0736485	0.844624	FALSE
ANXA11	0.336324	0.527691	FALSE
ANXA2	0.106848	0.332406	TRUE
ANXA3	0.148248	0.902222	FALSE
ANXA4	0.606363	0.621731	FALSE
ANXA5	0.246961	0.512811	FALSE
ANXA6	0.279038	0.683456	TRUE
ANXA7	0.447541	0.54296	TRUE
ANXA8	0.175014	0.561489	FALSE
ANXA8L1	0.200287	0.736266	FALSE
ANXA9	0.186842	0.387881	FALSE
AOAH	-0.0644324	0.570377	FALSE
AOC3	0.0406972	0.681655	FALSE
AOX1	0.122334	0.741492	FALSE
AP1AR	0.367828	0.437742	TRUE
AP1B1	0.295385	0.177254	TRUE
AP1G1	0.509227	0.617793	TRUE
AP1G2	0.461043	0.470037	TRUE
AP1M1	0.526418	0.294286	TRUE
AP1M2	0.268332	0.383447	TRUE
AP1S1	0.446518	0.267424	TRUE
AP1S3	0.253878	0.439185	TRUE
AP2A1	0.194312	0.178028	TRUE
AP2A2	0.461698	0.38024	FALSE
AP2B1	0.658338	0.118151	FALSE
AP2M1	0.517567	0.174136	FALSE
AP2S1	0.369337	0.267738	FALSE
AP3B1	0.570043	0.482918	TRUE
AP3B2	0.208284	0.577641	TRUE
AP3D1	0.50039	0.383202	TRUE
AP3M1	0.542254	0.0153526	TRUE
AP3M2	0.646908	0.395065	TRUE
AP3S1	0.108892	0.378335	TRUE
AP4B1	0.44325	-0.137093	TRUE
AP4E1	0.446299	0.282066	TRUE
AP4M1	0.252504	0.26108	TRUE
AP4S1	0.51166	0.0675742	TRUE
AP5B1	0.42275	0.198119	TRUE
AP5M1	0.597947	0.105006	TRUE
AP5S1	0.13167	0.0373052	TRUE
AP5Z1	0.270984	0.0980533	TRUE
APAF1	0.237502	0.459211	TRUE
APBA1	0.0874217	0.513761	TRUE
APBA2	-0.0304769	0.669409	FALSE
APBA3	0.219602	0.123104	FALSE
APBB1	0.296657	0.460013	TRUE
APBB1IP	-0.0554799	0.762588	TRUE
APBB2	0.347884	0.790594	FALSE
APC	0.40051	0.325276	TRUE
APC2	0.5	1	FALSE
APCS	-0.5	1	FALSE
APEH	0.563492	0.390512	FALSE
APEX1	0.531109	0.577749	TRUE
API5	0.614663	0.284906	TRUE
APIP	0.580109	0.508054	FALSE
APLF	0.399044	0.41647	FALSE
APLP2	0.418794	0.513474	FALSE
APMAP	0.323591	0.608269	FALSE
APOA1	-0.0643921	-0.106299	TRUE
APOA2	-0.0220588	0.365196	FALSE
APOB	0.153785	0.0927009	FALSE
APOBEC3B	0.210936	0.481378	FALSE
APOBEC3C	0.273091	0.604409	FALSE
APOBEC3D	0.270956	0.201917	FALSE
APOBEC3F	0.178936	0.470559	FALSE
APOBEC3G	0.256271	0.67844	FALSE
APOBR	0.271339	0.652972	FALSE
APOC1	-0.152353	-0.133821	FALSE
APOC2	-0.103106	-0.198179	FALSE
APOC3	-0.013986	-0.565934	FALSE
APOC4	-0.103106	-0.215799	FALSE
APOD	-0.0615325	0.413762	FALSE
APOE	-0.192729	0.225262	FALSE
APOF	0.144294	0.123887	FALSE
APOH	-0.0424242	0.356643	FALSE
APOL1	0.178059	0.216504	TRUE
APOL2	0.213848	0.506251	FALSE
APOL3	0.124019	0.725716	FALSE
APP	0.367735	0.609982	TRUE
APPBP2	0.65487	0.464453	FALSE
APPL1	0.435071	0.557893	TRUE
APPL2	0.369812	0.738298	FALSE
APRT	0.497091	0.441876	FALSE
APTX	0.650759	0.590521	FALSE
AQP1	0.09276	0.439742	TRUE
AQR	0.297968	0.0356718	TRUE
ARAP1	0.411604	0.280645	FALSE
ARAP2	0.252619	0.319374	FALSE
ARAP3	0.0145813	0.559223	FALSE
ARCN1	0.73124	0.540902	FALSE
ARF1	0.454978	0.286348	TRUE
ARF4	0.494878	0.522439	FALSE
ARF5	0.632306	0.510425	FALSE
ARF6	0.513949	0.298414	FALSE
ARFGAP1	0.385884	0.438572	FALSE
ARFGAP2	0.496261	0.436587	FALSE
ARFGAP3	0.474039	0.543832	FALSE
ARFGEF1	0.525866	0.623496	FALSE
ARFGEF2	0.184036	0.585507	FALSE
ARFIP1	0.689249	0.455789	FALSE
ARFIP2	0.668993	0.672151	TRUE
ARFRP1	0.17424	0.32775	FALSE
ARG1	0.623988	0.266667	FALSE
ARGLU1	0.653391	0.35141	FALSE
ARHGAP1	0.334	0.662727	FALSE
ARHGAP10	0.375629	0.841115	TRUE
ARHGAP12	0.284329	0.667641	FALSE
ARHGAP15	-0.00286819	0.558477	FALSE
ARHGAP17	0.478716	0.579493	TRUE
ARHGAP18	0.142738	0.651836	FALSE
ARHGAP21	0.468521	0.647638	FALSE
ARHGAP22	0.18173	0.104407	FALSE
ARHGAP23	0.126443	0.353353	FALSE
ARHGAP24	0.0220298	0.634851	FALSE
ARHGAP25	0.0782642	0.710319	FALSE
ARHGAP26	0.00280533	0.693973	FALSE
ARHGAP27	0.141433	0.643785	FALSE
ARHGAP28	-0.0449333	0.497844	FALSE
ARHGAP29	0.211331	0.747936	FALSE
ARHGAP30	-0.107808	0.554651	FALSE
ARHGAP31	0.0525354	0.611527	FALSE
ARHGAP32	0.24603	0.769368	FALSE
ARHGAP35	0.568986	0.738055	FALSE
ARHGAP39	0.496029	0.179707	FALSE
ARHGAP42	0.318567	0.190215	FALSE
ARHGAP44	0.378592	0.0637142	FALSE
ARHGAP5	0.35429	0.610332	FALSE
ARHGAP9	0.188938	0.613217	FALSE
ARHGDIA	0.593145	0.316489	FALSE
ARHGDIB	0.041801	0.668899	FALSE
ARHGEF1	0.0795426	0.474921	TRUE
ARHGEF10	0.519551	0.690627	FALSE
ARHGEF10L	0.211017	0.580697	FALSE
ARHGEF11	0.439856	0.5391	FALSE
ARHGEF12	0.431318	0.754188	FALSE
ARHGEF16	0.365359	0.662218	FALSE
ARHGEF17	0.52695	0.577359	FALSE
ARHGEF18	0.303943	0.50328	TRUE
ARHGEF2	0.433083	0.648821	TRUE
ARHGEF26	0.0111573	0.67314	FALSE
ARHGEF28	0.21456	0.488394	FALSE
ARHGEF3	0.275744	0.317463	FALSE
ARHGEF35	0.380048	0.496262	FALSE
ARHGEF37	0.260777	0.670946	FALSE
ARHGEF38	0.268406	0.757126	FALSE
ARHGEF40	0.272217	0.681027	FALSE
ARHGEF5	0.44153	0.574594	FALSE
ARHGEF7	0.773444	0.602781	TRUE
ARID1A	0.477944	0.409162	TRUE
ARID1B	0.573395	0.462364	TRUE
ARID2	0.486843	0.427549	TRUE
ARID3A	0.302943	0.39293	FALSE
ARID4A	0.556483	0.304765	TRUE
ARID4B	0.475792	0.197901	TRUE
ARID5B	0.182954	0.30508	FALSE
ARIH1	0.636039	0.518025	FALSE
ARIH2	0.666535	0.207498	FALSE
ARL1	0.397218	0.190281	TRUE
ARL14EP	0.636582	0.0380741	FALSE
ARL15	0.264311	0.5913	FALSE
ARL2	0.486833	0.331124	TRUE
ARL2BP	0.592965	0.449028	FALSE
ARL3	0.152912	0.592408	FALSE
ARL4C	0.175372	0.702832	FALSE
ARL5B	0.586802	0.315599	FALSE
ARL6	0.373811	0.437981	FALSE
ARL6IP1	0.297609	-0.101286	FALSE
ARL6IP4	0.498257	0.202994	FALSE
ARL6IP5	0.477007	0.275073	FALSE
ARL6IP6	0.489655	-0.184556	FALSE
ARL8A	0.537049	0.303598	FALSE
ARL8B	0.502803	0.180652	FALSE
ARMC1	0.61675	0.4544	FALSE
ARMC10	0.607847	0.330719	FALSE
ARMC5	0.392846	0.155818	FALSE
ARMC6	0.456631	0.394755	FALSE
ARMC8	0.464915	0.474247	TRUE
ARMC9	-0.0100102	0.577499	FALSE
ARNT	0.0668224	0.309612	TRUE
ARNT2	0.191638	0.689081	FALSE
ARNTL	0.193382	0.357276	TRUE
ARPC1A	0.501732	-0.246384	FALSE
ARPC1B	0.496217	0.403657	TRUE
ARPC2	0.50624	0.516253	TRUE
ARPC3	0.369658	0.173765	TRUE
ARPC4	0.544868	0.284339	TRUE
ARPC5	0.298175	0.327109	TRUE
ARPC5L	0.560904	0.295773	FALSE
ARPP19	0.371611	0.490687	FALSE
ARRB1	0.361259	0.58809	TRUE
ARRB2	0.343788	0.57689	TRUE
ARRDC1	0.462731	0.391814	FALSE
ARSA	0.139502	0.348479	FALSE
ARSB	-0.186733	0.580148	FALSE
ARSI	-0.0869156	0.471137	FALSE
ARV1	0.545478	0.40174	FALSE
ARVCF	0.351765	0.498166	FALSE
AS3MT	0.218825	0.717311	FALSE
ASAH1	0.263595	0.629391	TRUE
ASAP1	0.346231	0.59009	TRUE
ASAP2	0.300218	0.62646	FALSE
ASAP3	0.31027	0.428946	FALSE
ASB13	0.138152	0.649502	FALSE
ASB6	0.568096	0.289547	TRUE
ASCC1	0.52943	0.204473	TRUE
ASCC2	0.493285	0.360104	TRUE
ASCC3	0.411458	0.449186	TRUE
ASF1A	0.694208	0.500723	TRUE
ASF1B	0.291434	0.550923	TRUE
ASH1L	0.388036	0.110866	FALSE
ASH2L	0.771569	0.608877	TRUE
ASL	0.248723	0.521553	FALSE
ASNA1	0.325793	0.358384	FALSE
ASNS	0.411717	0.585151	FALSE
ASNSD1	0.450714	0.250659	FALSE
ASPA	0.142771	0.65492	FALSE
ASPH	0.0512799	0.653613	FALSE
ASPM	0.180928	0.178137	FALSE
ASPN	0.0986858	0.618982	FALSE
ASPSCR1	0.5291	0.422307	FALSE
ASRGL1	0.239729	0.776103	FALSE
ASS1	0.312428	0.887643	FALSE
ASTN2	0.351139	0.0601081	FALSE
ASUN	0.582625	0.424984	FALSE
ASXL2	0.16918	-0.0303879	FALSE
ASXL3	0.0390146	0.163492	FALSE
ATAD1	0.482874	0.379268	FALSE
ATAD2	0.579804	0.763572	FALSE
ATAD2B	0.303334	0.25524	FALSE
ATAD3A	0.333013	0.381841	FALSE
ATAD3B	0.333013	0.286373	FALSE
ATAD5	0.379453	0.271989	FALSE
ATAT1	0.422166	0.138428	FALSE
ATE1	0.329853	0.697285	FALSE
ATF1	0.426167	0.444812	FALSE
ATF2	0.322444	0.0901226	TRUE
ATF6	0.454935	0.070621	FALSE
ATF7	0.400858	0.366969	FALSE
ATF7IP	0.308443	0.320309	TRUE
ATG12	0.51728	0.200948	FALSE
ATG13	0.429166	0.262461	TRUE
ATG14	0.615456	0.266528	TRUE
ATG16L1	0.449031	0.5307	TRUE
ATG2A	0.344997	0.139138	FALSE
ATG2B	0.481583	0.561465	FALSE
ATG3	0.450386	0.580849	FALSE
ATG4B	0.423594	0.25412	FALSE
ATG4C	0.539273	0.334505	FALSE
ATG5	0.729407	0.463117	FALSE
ATG7	0.364262	0.333008	FALSE
ATG9A	0.388718	0.370728	FALSE
ATIC	0.413468	0.477256	FALSE
ATL1	0.31593	0.615643	TRUE
ATL2	0.559726	0.477981	TRUE
ATL3	0.353422	0.19286	TRUE
ATM	0.394652	0.429687	TRUE
ATN1	0.521367	0.313188	FALSE
ATOX1	0.361654	0.373743	FALSE
ATP10A	0.146429	0.0491193	FALSE
ATP11A	0.508411	0.363477	FALSE
ATP11B	0.176476	0.671959	FALSE
ATP12A	0.0324687	0.130622	FALSE
ATP13A1	0.254212	0.361961	FALSE
ATP13A2	0.282055	0.200717	FALSE
ATP13A3	0.330587	0.258108	FALSE
ATP1A1	0.407688	0.424177	FALSE
ATP1B1	0.205826	0.635941	TRUE
ATP1B3	0.318748	0.658979	FALSE
ATP2A2	0.259553	0.303042	TRUE
ATP2B1	0.232724	0.464902	FALSE
ATP2B4	0.0714279	0.542189	FALSE
ATP2C1	0.25467	0.269291	FALSE
ATP5A1	0.615538	0.172965	TRUE
ATP5B	0.180996	0.0270669	TRUE
ATP5C1	0.794993	0.10529	TRUE
ATP5D	0.286867	-0.123155	TRUE
ATP5E	0.525015	0.0526632	TRUE
ATP5F1	0.613369	0.166092	TRUE
ATP5H	0.691616	0.14267	TRUE
ATP5I	0.455259	0.148506	TRUE
ATP5J	0.638757	0.0741951	TRUE
ATP5L	0.553807	0.170236	TRUE
ATP5O	0.594951	-0.0699457	TRUE
ATP5S	0.175641	0.334975	FALSE
ATP5SL	0.399354	-0.0423963	FALSE
ATP6V0A1	0.462245	0.321283	FALSE
ATP6V0A2	0.280475	0.237099	FALSE
ATP6V0A4	0.157422	0.631063	FALSE
ATP6V0D1	0.559833	0.513019	TRUE
ATP6V1A	0.329005	0.258485	TRUE
ATP6V1B1	0.284866	0.713549	FALSE
ATP6V1B2	0.514785	0.542015	TRUE
ATP6V1C1	0.595965	0.468081	FALSE
ATP6V1C2	1	0.2	FALSE
ATP6V1D	0.687953	0.267672	FALSE
ATP6V1E1	0.481808	0.0601313	FALSE
ATP6V1F	0.49061	0.153024	FALSE
ATP6V1G1	0.555904	-0.07365	FALSE
ATP6V1G2	0.410687	0.0823665	FALSE
ATP6V1H	0.605311	0.220666	FALSE
ATP8A1	0.268492	0.409806	FALSE
ATP8A2	0.377337	0.293821	FALSE
ATP8B1	0.124993	0.647744	FALSE
ATP8B2	-0.157231	0.189218	FALSE
ATP8B3	0.214098	0.199657	FALSE
ATP9A	0.421019	0.364386	FALSE
ATP9B	0.559442	0.25643	FALSE
ATPAF1	0.167055	0.198542	FALSE
ATPAF2	0.459407	0.201341	FALSE
ATPIF1	0.436497	0.382059	TRUE
ATR	0.240965	0.0120976	TRUE
ATRAID	0.268606	0.087464	FALSE
ATRIP	0.293237	-0.0505397	TRUE
ATRN	0.422029	0.227051	FALSE
ATXN1	-0.00128042	0.695269	TRUE
ATXN10	0.466961	0.540647	FALSE
ATXN1L	0.567126	0.366241	FALSE
ATXN2	0.417165	0.476124	FALSE
ATXN2L	0.468876	0.286995	FALSE
ATXN3	0.396016	0.351017	FALSE
ATXN7	0.359141	0.270107	TRUE
ATXN7L2	0.483039	-0.10743	TRUE
ATXN7L3	0.543035	0.297566	TRUE
ATXN7L3B	0.58586	0.535121	FALSE
AUH	0.441005	0.527178	FALSE
AUP1	0.395476	0.348426	TRUE
AURKA	0.49233	0.807637	TRUE
AURKB	0.163152	0.747261	TRUE
AUTS2	0.258407	0.658999	FALSE
AVEN	0.195707	0.444738	FALSE
AVL9	0.47373	0.582983	FALSE
AXIN1	0.553189	-0.0416233	TRUE
AXL	0.0488162	0.423879	FALSE
AZGP1	0.0334659	0.488879	TRUE
AZI2	0.520159	0.254358	TRUE
AZU1	-0.078211	-0.17649	FALSE
B2M	0.239721	0.386725	FALSE
B3GAT3	0.488348	0.433602	FALSE
B3GNT2	0.29892	0.122546	FALSE
B3GNTL1	0.183761	0.115789	FALSE
B4GALT1	0.201715	0.545887	FALSE
B4GALT2	0.596414	0.0231398	FALSE
B4GALT3	0.43959	0.300602	FALSE
B4GALT4	0.265042	0.316062	FALSE
B4GALT7	0.303267	-0.0621859	FALSE
B9D1	0.0700611	0.246088	FALSE
BABAM1	0.535069	0.108734	FALSE
BACH1	0.432179	0.635339	TRUE
BAD	0.418215	0.114027	FALSE
BAG1	0.224403	0.636464	TRUE
BAG2	0.306071	0.400576	FALSE
BAG3	0.40167	0.674801	FALSE
BAG4	0.753702	0.651923	FALSE
BAG5	0.711226	0.568742	TRUE
BAHD1	0.341478	0.187062	FALSE
BAIAP2	0.471051	0.683512	FALSE
BAIAP2L1	0.376855	0.814457	FALSE
BAK1	0.34763	0.221705	TRUE
BANF1	0.45303	0.0144604	TRUE
BANP	0.443679	0.287082	TRUE
BAP1	0.508526	0.163783	FALSE
BARD1	0.371164	0.0702958	TRUE
BASP1	0.314893	0.645933	FALSE
BAX	0.0683761	0.316875	TRUE
BAZ1A	0.454347	0.514178	TRUE
BAZ1B	0.431565	0.421362	TRUE
BAZ2A	0.414916	0.196765	TRUE
BAZ2B	0.19452	0.0512788	FALSE
BBC3	0.196621	0.377402	FALSE
BBOX1	0.0268485	0.816609	FALSE
BBS1	0.208708	0.401678	TRUE
BBS2	0.294603	0.400535	TRUE
BBS4	0.491159	0.636504	TRUE
BBS7	0.114909	0.0842671	TRUE
BBS9	0.377781	0.359906	TRUE
BBX	0.175976	0.447434	FALSE
BCAM	0.162719	0.718361	FALSE
BCAP29	0.301401	0.357397	FALSE
BCAR1	0.431669	0.320074	TRUE
BCAR3	0.181929	0.733249	FALSE
BCAS1	0.0441132	0.857328	FALSE
BCAS3	0.409176	0.568226	FALSE
BCAS4	0.131554	0.522945	FALSE
BCAT1	0.0116854	0.658728	FALSE
BCAT2	0.137407	0.598567	FALSE
BCCIP	0.664928	0.00264474	TRUE
BCHE	-0.197554	0.383699	FALSE
BCKDHA	0.543687	0.337908	FALSE
BCKDHB	0.387614	0.567889	FALSE
BCKDK	0.619204	0.402759	FALSE
BCL10	0.447539	0.381733	TRUE
BCL11A	0.397494	0.644236	FALSE
BCL11B	0.0309024	0.157937	FALSE
BCL2	0.329199	0.615951	TRUE
BCL2L1	0.301372	0.592355	TRUE
BCL2L11	0.216998	0.454282	FALSE
BCL2L13	0.567015	0.486451	FALSE
BCL3	0.025432	0.453389	TRUE
BCL6	0.0154182	0.396885	TRUE
BCL7A	0.315026	0.479703	FALSE
BCL7B	0.522769	0.31774	FALSE
BCL7C	0.444872	0.220009	FALSE
BCL9	0.3741	0.586999	FALSE
BCL9L	0.330285	0.457031	FALSE
BCLAF1	0.551524	0.0517366	FALSE
BCR	0.264733	0.460117	FALSE
BCS1L	0.427779	0.375939	FALSE
BDH1	0.341689	0.394398	FALSE
BDH2	0.0653748	0.404932	FALSE
BDP1	0.381463	0.126007	TRUE
BECN1	0.608719	0.224462	TRUE
BEND3	0.541554	0.719596	FALSE
BEND5	0.303472	0.0972703	FALSE
BET1	0.471856	0.286586	FALSE
BET1L	0.533892	0.429871	FALSE
BHLHE40	0.0882026	0.584391	FALSE
BICC1	-0.203014	0.744763	FALSE
BICD1	0.425124	0.547526	FALSE
BICD2	0.435029	0.61981	TRUE
BID	0.292443	0.621492	FALSE
BIN2	0.081569	0.643224	FALSE
BIN3	0.58617	0.234323	FALSE
BIRC2	0.595201	0.302977	TRUE
BIRC5	0.537095	0.645293	TRUE
BIRC6	0.279528	0.108373	FALSE
BLK	0.175854	-0.0138163	FALSE
BLM	0.271139	0.462104	TRUE
BLMH	0.373644	0.761378	FALSE
BLNK	0.266284	0.72373	TRUE
BLOC1S1	0.304833	-0.11959	TRUE
BLOC1S2	0.234516	0.176561	TRUE
BLOC1S3	0.348428	0.168994	TRUE
BLOC1S4	0.436281	0.0465467	TRUE
BLOC1S5	0.51254	0.0735739	TRUE
BLOC1S6	0.576566	0.282046	TRUE
BLVRA	0.363576	0.80304	TRUE
BLVRB	0.241823	0.43962	FALSE
BLZF1	0.500143	0.330304	FALSE
BMF	-0.0296257	0.309969	FALSE
BMP1	0.21881	0.537548	FALSE
BMP2K	0.281851	0.638542	FALSE
BMPER	0.0686467	0.664956	FALSE
BMPR2	0.251478	0.381096	FALSE
BMS1	0.525829	0.527164	FALSE
BNIP1	0.37009	0.390373	FALSE
BNIP2	0.403232	0.267338	FALSE
BNIP3	0.231217	0.361579	FALSE
BNIP3L	0.557958	0.440516	FALSE
BOD1	0.231027	0.458251	TRUE
BOD1L1	0.530062	0.350455	TRUE
BOD1L2	0.212331	0.28673	FALSE
BOK	0.177532	0.245264	FALSE
BOLA1	0.585014	0.466983	FALSE
BOLA2	-0.142857	0.214286	TRUE
BOLA3	0.398625	0.367396	FALSE
BOP1	0.543422	0.686915	TRUE
BPGM	0.385187	0.24246	FALSE
BPHL	0.589356	0.598329	FALSE
BPI	0.0481325	0.391912	FALSE
BPIFB1	-0.0467955	0.733765	FALSE
BPIFB2	-0.0264675	0.208007	FALSE
BPIFB4	-0.17733	-1	FALSE
BPNT1	0.575873	0.513405	FALSE
BPTF	0.566296	0.530052	TRUE
BRAF	0.312916	0.680354	TRUE
BRAP	0.625442	0.395673	FALSE
BRAT1	0.376493	0.385251	FALSE
BRCA1	0.362819	0.361312	TRUE
BRCA2	0.255513	0.0393822	TRUE
BRD1	0.514791	0.237859	TRUE
BRD2	0.300967	0.339669	FALSE
BRD3	0.530735	0.675555	FALSE
BRD4	0.392104	0.354378	TRUE
BRD7	0.751069	0.092601	TRUE
BRD8	0.407645	0.379307	TRUE
BRD9	0.432538	0.232587	FALSE
BRDT	0.116443	0.311597	FALSE
BRE	0.00505186	0.132373	TRUE
BRF1	0.0629515	-0.0236453	TRUE
BRI3BP	0.232431	0.264158	FALSE
BRIP1	0.561449	0.30385	TRUE
BRIX1	0.463841	0.484094	TRUE
BRK1	0.679085	0.0629533	TRUE
BRMS1	0.502966	0.297786	TRUE
BRMS1L	0.349361	0.348981	TRUE
BROX	0.506426	0.638875	FALSE
BRPF1	0.422029	0.254689	TRUE
BRPF3	0.282681	0.432294	TRUE
BRWD1	0.4083	0.12483	FALSE
BSCL2	0.555769	0.245287	FALSE
BSDC1	0.479097	0.568583	FALSE
BSG	0.407049	0.230086	TRUE
BSN	0.157181	0.118376	FALSE
BSPRY	0.519255	0.646223	FALSE
BST1	0.0164338	0.406222	FALSE
BST2	0.0279106	0.70252	FALSE
BTAF1	0.339718	0.223854	FALSE
BTBD1	0.520471	0.120253	FALSE
BTBD10	0.568049	0.122883	FALSE
BTBD16	0.162164	0.0680869	FALSE
BTBD2	0.345048	0.227879	FALSE
BTBD9	0.346802	0.186085	FALSE
BTD	0.556857	0.429551	FALSE
BTF3	0.681571	0.47428	FALSE
BTF3L4	0.516269	0.489705	FALSE
BTN2A1	0.28564	0.214174	FALSE
BTN3A1	0.202843	0.501398	FALSE
BTN3A3	0.214664	0.574484	FALSE
BUB1	0.503784	0.193787	TRUE
BUB1B	0.0571328	0.639325	TRUE
BUD13	0.523522	0.485621	TRUE
BUD31	0.70825	0.340771	TRUE
BYSL	0.600728	0.569548	FALSE
BZW1	0.247237	0.46659	TRUE
BZW2	0.171692	0.578763	FALSE
C10orf11	-0.00452622	0.474372	FALSE
C10orf12	0.41943	-0.0558473	FALSE
C10orf2	0.304574	0.202071	FALSE
C10orf35	0.495762	0.376593	FALSE
C10orf54	0.138617	0.307515	FALSE
C10orf76	0.615337	0.225692	FALSE
C10orf88	0.604731	0.187582	FALSE
C11orf31	0.572482	0.230107	FALSE
C11orf52	0.353299	0.487352	FALSE
C11orf54	0.500165	0.680665	FALSE
C11orf57	0.572383	0.30921	FALSE
C11orf58	0.587312	0.50879	FALSE
C11orf68	0.488449	0.335049	FALSE
C11orf84	0.426392	0.453566	FALSE
C11orf96	0.0812162	0.423569	FALSE
C12orf10	0.237568	0.329163	FALSE
C12orf29	0.37471	0.494728	FALSE
C12orf4	0.603234	-0.110947	FALSE
C12orf43	0.588155	0.321177	FALSE
C12orf45	0.118405	0.308277	FALSE
C12orf57	0.366599	0.368629	FALSE
C12orf66	0.344768	0.231851	TRUE
C12orf75	0.283271	0.548241	FALSE
C14orf119	0.263187	0.0981462	FALSE
C14orf159	0.241704	0.368533	FALSE
C14orf169	0.496658	0.350075	FALSE
C14orf2	0.606246	0.278706	FALSE
C15orf39	0.0935554	0.450519	FALSE
C15orf40	0.547994	0.465534	FALSE
C15orf48	0.18318	0.737044	FALSE
C15orf52	0.112766	0.712234	FALSE
C15orf57	0.681772	0.35522	FALSE
C16orf46	0.421046	0.357753	FALSE
C16orf58	0.716457	0.326306	FALSE
C16orf62	0.579263	0.516511	TRUE
C16orf70	0.526117	0.122298	FALSE
C17orf47	0.5	0.5	FALSE
C17orf49	0.507319	0.301946	FALSE
C17orf62	0.525683	0.233861	FALSE
C17orf75	0.485401	0.421156	FALSE
C17orf80	0.587872	0.537663	FALSE
C17orf97	0.181309	0.596829	FALSE
C18orf21	0.50792	0.0594144	FALSE
C18orf25	0.537535	0.51946	FALSE
C18orf32	0.613237	0.165819	FALSE
C18orf63	0.138346	-0.0634783	FALSE
C18orf8	0.655978	0.3934	FALSE
C19orf12	0.538353	0.267728	FALSE
C19orf25	0.371658	0.0805397	FALSE
C19orf33	0.367099	0.00359664	FALSE
C19orf43	0.475899	0.32015	TRUE
C19orf47	-0.24614	-0.238706	FALSE
C19orf52	0.475242	0.0500288	FALSE
C19orf53	0.477693	-0.0847655	FALSE
C19orf54	0.252207	0.263247	FALSE
C19orf66	0.325618	0.541056	FALSE
C19orf70	0.373457	0.0378312	FALSE
C1D	0.226234	-0.17814	FALSE
C1orf109	0.622624	0.223082	FALSE
C1orf116	0.0749215	0.871047	FALSE
C1orf122	0.557902	0.261459	FALSE
C1orf123	0.527523	0.211872	FALSE
C1orf131	0.646403	0.414259	FALSE
C1orf174	0.617783	0.10681	FALSE
C1orf198	0.335478	0.642008	FALSE
C1orf21	0.368076	0.636687	FALSE
C1orf226	0.286882	0.801891	FALSE
C1orf27	0.604147	0.405084	FALSE
C1orf35	0.436548	0.53193	FALSE
C1orf43	0.57616	0.0913736	FALSE
C1orf50	0.676484	0.509913	FALSE
C1orf52	0.45678	0.248506	FALSE
C1orf56	-0.302374	0.121429	FALSE
C1QA	0.157113	0.266065	TRUE
C1QB	0.0889808	0.321362	TRUE
C1QBP	0.612361	0.56304	TRUE
C1QC	0.148226	0.319809	TRUE
C1QTNF3	0.0608646	0.673909	FALSE
C1QTNF5	0.0976768	0.524574	FALSE
C1QTNF6	0.182608	0.246834	FALSE
C1R	0.144665	0.604668	FALSE
C1RL	0.424121	0.26058	FALSE
C1S	0.155645	0.660394	FALSE
C2	0.0327869	0.0805401	FALSE
C20orf24	0.484627	0.348941	FALSE
C20orf27	0.271167	0.469265	FALSE
C21orf2	0.144503	0.176764	FALSE
C21orf33	0.520901	0.385905	FALSE
C21orf59	0.580543	0.449973	FALSE
C22orf29	0.365039	-0.000205787	FALSE
C2CD2	0.249097	0.428398	FALSE
C2CD2L	0.407317	0.400324	FALSE
C2CD3	0.527213	0.22117	FALSE
C2CD5	0.535878	0.602168	FALSE
C2orf16	-0.0642857	0.338235	FALSE
C2orf47	0.594482	0.282171	FALSE
C2orf49	0.428708	0.226706	FALSE
C2orf54	0.294924	0.6043	FALSE
C2orf68	0.488868	0.128524	FALSE
C2orf69	0.509643	0.446291	FALSE
C2orf72	0.131339	0.362869	FALSE
C2orf76	0.372313	0.136772	FALSE
C3	0.252903	0.250264	TRUE
C3orf38	0.392757	0.275332	FALSE
C3orf58	0.204403	0.581842	FALSE
C4A	-0.34411	0.466564	FALSE
C4B	-0.343026	0.279631	FALSE
C4BPA	0.181971	0.113218	FALSE
C4BPB	0.349025	0.0498963	FALSE
C4orf3	0.278758	0.00922748	FALSE
C4orf32	0.199697	0.344414	FALSE
C4orf33	0.225522	0.214373	FALSE
C5	0.070101	-0.108705	FALSE
C5orf15	0.353775	-0.162581	FALSE
C5orf22	0.480212	0.393751	FALSE
C5orf24	0.216278	0.261902	FALSE
C5orf30	0.58458	0.665209	FALSE
C5orf42	0.251197	0.108872	FALSE
C5orf51	0.611875	0.564644	FALSE
C6	-0.138358	0.320554	FALSE
C6orf106	0.454633	0.39764	FALSE
C6orf120	0.600805	0.132305	FALSE
C6orf132	0.162205	0.510497	FALSE
C6orf203	0.716105	0.368481	FALSE
C6orf47	0.324847	0.0736831	FALSE
C6orf89	0.370243	0.100012	FALSE
C7	-0.0572636	0.489381	FALSE
C7orf25	0.517199	0.506802	FALSE
C7orf26	0.468007	0.100185	FALSE
C7orf43	0.265235	0.230191	FALSE
C7orf50	0.47198	0.301754	FALSE
C8A	0	-0.0272727	FALSE
C8B	0.118636	-0.132162	FALSE
C8G	0.121628	-0.107192	FALSE
C8orf33	0.710091	0.434567	FALSE
C8orf37	0.329473	0.611342	FALSE
C8orf59	0.417646	0.131005	FALSE
C8orf82	0.442532	0.391266	FALSE
C9	0.101944	0.289563	FALSE
C9orf142	0.465173	0.149966	FALSE
C9orf152	0.264594	0.790316	FALSE
C9orf16	0.25416	0.116437	FALSE
C9orf40	0.398449	0.425645	FALSE
C9orf64	0.179816	0.75015	FALSE
C9orf72	0.324646	0.341315	TRUE
C9orf78	0.650477	0.535433	FALSE
CA1	-0.146371	0.0126814	FALSE
CA12	0.194509	0.820224	FALSE
CA13	0.0633156	0.674986	FALSE
CA2	0.101456	0.544044	FALSE
CA3	0.0637874	0.446022	FALSE
CA8	-0.0321691	0.860769	FALSE
CA9	0.0731064	0.641661	FALSE
CAAP1	0.603398	0.131058	FALSE
CAB39	0.557953	0.579469	TRUE
CAB39L	0.402128	0.878282	FALSE
CABIN1	0.432872	0.200548	TRUE
CABLES1	0.410388	0.503174	FALSE
CACHD1	0.211246	0.0490498	FALSE
CACNA2D1	-0.145294	0.657648	FALSE
CACNA2D2	0.26307	0.492946	FALSE
CACNA2D3	0.100577	0.13209	FALSE
CACNB3	0.256021	0.50517	FALSE
CACNG6	0.150385	-0.0604238	FALSE
CACTIN	0.217527	0.307424	TRUE
CACUL1	0.605459	0.694568	FALSE
CACYBP	0.273269	0.602896	TRUE
CAD	0.346728	0.401363	FALSE
CADM1	0.165731	0.759666	TRUE
CADM4	-0.122054	0.311773	FALSE
CADPS2	0.0930293	0.863487	FALSE
CALB2	0.396328	0.831684	FALSE
CALCOCO1	0.220667	0.384213	FALSE
CALCOCO2	0.546472	0.48307	FALSE
CALD1	0.0665245	0.685172	FALSE
CALM2	0.366068	0.118244	FALSE
CALML3	-0.0707884	0.677961	FALSE
CALML5	0.240173	0.735002	FALSE
CALR	0.413651	0.620304	TRUE
CALU	0.490111	0.667186	FALSE
CAMK1	0.091734	0.543633	FALSE
CAMK1D	0.471627	0.71653	FALSE
CAMK2B	0.140296	0.521947	FALSE
CAMK2D	-0.0202	0.791931	TRUE
CAMK2G	0.513119	0.18846	FALSE
CAMK4	-0.0675167	0.620436	FALSE
CAMKK1	0.381644	0.574416	FALSE
CAMKK2	0.529014	0.416353	FALSE
CAMKMT	0.436154	0.34023	FALSE
CAMLG	0.464383	0.195555	TRUE
CAMP	0.06135	0.155815	FALSE
CAMSAP1	0.252854	0.340786	FALSE
CAMSAP2	0.312679	0.513475	FALSE
CAMSAP3	0.386323	0.550648	FALSE
CAND1	0.324623	0.365873	TRUE
CAND2	0.196889	0.685916	FALSE
CANT1	0.559138	0.686023	FALSE
CANX	0.569705	0.234013	TRUE
CAP1	0.497401	0.581567	TRUE
CAP2	0.00514808	0.784199	FALSE
CAPG	0.410486	0.591179	TRUE
CAPN1	0.338831	0.369198	TRUE
CAPN13	0.0523261	0.793253	FALSE
CAPN15	0.390833	0.17549	FALSE
CAPN2	0.100479	0.694516	FALSE
CAPN5	0.226676	0.5809	FALSE
CAPN7	0.573015	0.508963	FALSE
CAPN9	0.222584	0.407372	FALSE
CAPNS1	0.362977	0.416429	TRUE
CAPNS2	0.0817808	0.0522018	FALSE
CAPRIN1	0.456434	0.476996	TRUE
CAPS	0.0648003	0.852748	FALSE
CAPZA1	0.526051	0.406628	TRUE
CAPZA2	0.322708	0.32735	FALSE
CARD10	0.175452	0.594184	FALSE
CARD11	0.0726226	0.622535	TRUE
CARD14	0.29334	0.698429	FALSE
CARD6	0.0682444	0.615285	FALSE
CARD8	0.301454	0.352765	TRUE
CARD9	0.161822	0.598509	FALSE
CARHSP1	0.209986	0.473151	FALSE
CARM1	0.306721	0.629772	TRUE
CARS	0.400786	0.542935	FALSE
CARS2	0.655029	0.550833	FALSE
CARTPT	0.218719	0.402752	FALSE
CASC3	0.731956	0.310411	TRUE
CASC4	0.534389	0.469258	FALSE
CASD1	0.18354	0.670739	FALSE
CASKIN2	0.382314	0.400528	FALSE
CASP1	0.250147	0.743829	TRUE
CASP10	0.313789	0.735515	TRUE
CASP12	0.078106	0.0266937	FALSE
CASP14	0.189556	0.620977	FALSE
CASP2	0.553864	0.574108	TRUE
CASP3	0.469521	0.738289	FALSE
CASP4	0.403759	0.684397	FALSE
CASP6	0.488115	0.691313	FALSE
CASP7	0.413886	0.816146	FALSE
CASP8	0.398104	0.592593	TRUE
CASP9	0.350728	0.471918	TRUE
CASQ2	-0.0332131	-0.0297239	FALSE
CAST	0.424814	0.101569	FALSE
CASZ1	0.191537	0.643614	FALSE
CAT	0.431478	0.361416	FALSE
CAV1	-0.059327	0.527541	TRUE
CBFA2T2	0.391174	0.373276	FALSE
CBFA2T3	0.0130555	0.254588	FALSE
CBFB	0.63013	0.536001	TRUE
CBL	0.483007	0.350354	TRUE
CBLB	0.277686	0.419743	TRUE
CBLL1	0.426038	0.0231808	FALSE
CBR1	0.152154	0.625861	FALSE
CBR3	0.313416	0.733049	FALSE
CBR4	0.547098	0.577678	FALSE
CBS	0.286486	0.611428	FALSE
CBWD2	0.0424527	0.342257	FALSE
CBX1	0.542541	0.2347	FALSE
CBX2	0.110664	0.673073	TRUE
CBX3	0.366094	0.320645	TRUE
CBX4	0.191015	0.427436	TRUE
CBX5	0.239207	0.568634	TRUE
CBX6	0.14837	0.424524	FALSE
CBX7	0.0409208	0.697607	FALSE
CBX8	0.417258	0.336325	TRUE
CC2D1A	0.431071	0.457586	FALSE
CC2D1B	0.403311	0.357474	FALSE
CC2D2A	0.245944	0.286957	TRUE
CCAR1	0.494103	0.364443	TRUE
CCDC102A	0.342733	0.371194	FALSE
CCDC115	0.42504	0.05608	FALSE
CCDC117	0.398537	0.497947	FALSE
CCDC12	0.507035	0.249745	FALSE
CCDC124	0.414136	0.241246	FALSE
CCDC125	0.229354	0.418976	FALSE
CCDC127	0.423283	0.549064	FALSE
CCDC13	0.198385	0.00939249	FALSE
CCDC130	0.322343	0.0458098	FALSE
CCDC134	0.377139	0.550196	FALSE
CCDC137	0.623151	0.353854	FALSE
CCDC14	0.251919	0.0749244	FALSE
CCDC141	-0.0253545	0.14853	FALSE
CCDC144A	0.174372	0.515112	FALSE
CCDC146	0.271962	0.174721	FALSE
CCDC149	0.556753	0.652772	FALSE
CCDC150	0.399592	-0.230245	FALSE
CCDC151	-0.0266683	0.185564	FALSE
CCDC168	0.213454	-0.0708313	FALSE
CCDC174	0.660325	0.399625	FALSE
CCDC175	-0.428571	-0.642857	FALSE
CCDC18	0.632121	0.329211	FALSE
CCDC180	-0.0230894	-0.0828993	FALSE
CCDC181	-0.0513105	-0.217778	FALSE
CCDC25	0.698811	0.63799	FALSE
CCDC28A	0.422828	0.280823	FALSE
CCDC43	0.732133	0.531335	FALSE
CCDC47	0.63169	0.384147	FALSE
CCDC50	0.230857	0.182072	FALSE
CCDC51	0.473524	0.444825	FALSE
CCDC53	0.474148	0.386103	TRUE
CCDC57	0.161017	-0.040065	FALSE
CCDC58	0.506084	0.286958	FALSE
CCDC6	0.467158	0.749949	FALSE
CCDC61	0.194462	0.390518	FALSE
CCDC7	0.133021	-0.0498251	FALSE
CCDC71L	0.429495	0.527636	FALSE
CCDC8	0.0797682	0.678285	TRUE
CCDC80	-0.201712	0.768549	FALSE
CCDC85B	0.357141	0.139431	TRUE
CCDC85C	0.30607	0.240132	FALSE
CCDC86	0.538069	0.418273	FALSE
CCDC88A	0.140563	0.552288	FALSE
CCDC88B	0.283735	0.241665	FALSE
CCDC88C	-0.0308291	0.327033	FALSE
CCDC9	0.2551	0.267434	FALSE
CCDC90B	0.512704	0.243086	FALSE
CCDC91	0.295195	0.565423	FALSE
CCDC92	0.443123	0.487892	TRUE
CCDC93	0.436537	0.167226	TRUE
CCDC94	0.369318	0.566547	FALSE
CCDC97	0.443264	0.224712	FALSE
CCHCR1	0.545619	0.0716927	FALSE
CCL14	0.187009	0.615367	FALSE
CCL16	0.0111143	0.190256	FALSE
CCL18	-0.0778796	0.227483	FALSE
CCL21	-0.0202699	0.692944	FALSE
CCL5	-0.112243	0.691563	FALSE
CCM2	0.304811	0.161677	FALSE
CCNA2	0.144676	0.501213	TRUE
CCNB1	0.00342958	0.723996	TRUE
CCNB2	0.0651283	0.735782	TRUE
CCNC	0.752065	0.142658	TRUE
CCND1	0.425959	0.812703	TRUE
CCNDBP1	0.387701	0.114278	FALSE
CCNH	0.611705	0.0725329	TRUE
CCNK	0.605193	0.024843	TRUE
CCNL1	0.412365	0.03015	FALSE
CCNL2	0.294565	0.31168	FALSE
CCNT1	0.582202	0.329195	TRUE
CCNT2	0.40161	0.141986	TRUE
CCNY	0.655964	0.160878	FALSE
CCNYL1	0.347142	0.421457	FALSE
CCP110	0.441101	0.331045	TRUE
CCPG1	0.444238	0.193539	FALSE
CCS	0.38425	0.214289	FALSE
CCSAP	0.48706	0.225564	FALSE
CCSER2	0.145426	0.299262	FALSE
CCT2	0.402327	0.202736	TRUE
CCT3	0.590638	0.415916	TRUE
CCT4	0.661279	0.386891	TRUE
CCT5	0.409162	0.234006	TRUE
CCT6A	0.424363	0.218858	TRUE
CCT7	0.609627	0.201582	TRUE
CCT8	0.539173	0.342238	TRUE
CCZ1	0.422004	0.293585	FALSE
CD109	-2.10025e-05	0.835033	FALSE
CD14	-0.143847	0.57149	FALSE
CD151	0.632091	0.30291	TRUE
CD163	0.0167951	0.604892	FALSE
CD177	0.0962767	0.393423	FALSE
CD180	-0.143256	0.585758	FALSE
CD2	0.109077	0.642725	FALSE
CD207	0.115651	0.542457	FALSE
CD209	0.156528	0.692361	FALSE
CD248	0.053826	0.687247	FALSE
CD276	0.216779	0.472555	FALSE
CD2AP	0.438343	0.721335	TRUE
CD2BP2	0.509381	0.504008	TRUE
CD300A	0.0623413	0.422	FALSE
CD320	0.205095	0.31486	FALSE
CD34	-0.0699917	0.629524	FALSE
CD36	-0.0690442	0.737966	FALSE
CD38	-0.0581132	0.690339	FALSE
CD3E	0.0819564	0.703179	FALSE
CD3EAP	0.431303	0.578428	TRUE
CD3G	0.0492856	0.689861	FALSE
CD4	-0.0694669	0.612515	FALSE
CD40	0.0606526	0.569944	FALSE
CD44	0.14454	0.584984	TRUE
CD46	0.462877	0.493044	FALSE
CD47	0.197282	0.26023	TRUE
CD48	-0.204511	0.649271	FALSE
CD5	0.127275	0.647299	FALSE
CD55	0.00912523	0.739461	FALSE
CD58	0.280331	0.44864	FALSE
CD59	0.104929	0.211205	FALSE
CD5L	0.239284	-0.0217973	FALSE
CD6	0.121804	0.489458	FALSE
CD63	0.384128	0.386365	TRUE
CD74	0.233084	0.389474	FALSE
CD79A	0.185056	0.502134	FALSE
CD81	0.337338	0.297667	TRUE
CD82	0.355545	0.427439	FALSE
CD84	-0.312446	0.265737	FALSE
CD8A	0.108099	0.709382	TRUE
CD9	0.372929	0.512565	TRUE
CD93	-0.015068	0.619564	FALSE
CDA	0.0560941	0.425631	FALSE
CDAN1	0.494094	0.37963	TRUE
CDC123	0.788745	0.68577	FALSE
CDC16	0.557493	0.278636	TRUE
CDC20	0.585821	0.7032	TRUE
CDC23	0.292072	0.323217	TRUE
CDC25C	0.182383	0.520779	FALSE
CDC26	0.318399	0.183862	FALSE
CDC27	0.395605	0.446004	TRUE
CDC34	0.314845	0.424766	TRUE
CDC37	0.462741	0.510722	TRUE
CDC37L1	0.583413	0.733486	FALSE
CDC40	0.742076	0.493199	TRUE
CDC42	0.642841	0.0821655	TRUE
CDC42BPA	0.242116	0.659647	FALSE
CDC42BPB	0.601589	0.499174	FALSE
CDC42BPG	0.362509	0.660757	FALSE
CDC42EP1	0.352925	0.50439	FALSE
CDC42EP2	0.118935	0.147307	FALSE
CDC42EP3	0.371766	0.64703	FALSE
CDC42EP4	0.441482	0.711011	FALSE
CDC42EP5	0.0484472	0.564833	FALSE
CDC42SE1	0.364935	0.499412	FALSE
CDC42SE2	0.301169	0.193461	FALSE
CDC73	0.464855	0.343773	TRUE
CDCA2	0.338792	0.580563	FALSE
CDCA5	0.311388	0.707353	TRUE
CDCA7L	0.0866684	0.387138	FALSE
CDCA8	0.530762	0.736412	TRUE
CDCP1	0.0709841	0.665173	TRUE
CDH1	0.360596	0.587986	TRUE
CDH11	0.112344	0.818876	FALSE
CDH13	0.135522	0.621147	FALSE
CDH2	-0.00354733	0.609685	TRUE
CDH5	-0.0317577	0.670386	TRUE
CDIPT	0.543292	0.224245	FALSE
CDK1	0.386069	0.785501	TRUE
CDK11A	0.284395	0.231435	FALSE
CDK11B	0.284395	0.333212	FALSE
CDK12	0.766152	0.562383	TRUE
CDK13	0.474147	0.273758	FALSE
CDK14	0.160771	0.492851	FALSE
CDK17	0.377376	0.55284	FALSE
CDK18	0.21838	0.526437	FALSE
CDK19	0.669076	0.533516	TRUE
CDK2	0.169795	0.614283	TRUE
CDK20	0.430036	-0.000878989	FALSE
CDK2AP1	0.308676	0.247809	FALSE
CDK4	0.102145	0.327958	TRUE
CDK5	0.260633	0.345599	TRUE
CDK5RAP1	0.544963	0.159893	FALSE
CDK5RAP2	0.482857	0.413584	FALSE
CDK5RAP3	0.446723	-0.0302459	FALSE
CDK6	0.286609	0.778707	TRUE
CDK7	0.494509	0.236861	TRUE
CDK8	0.59714	0.449873	TRUE
CDK9	0.368206	0.157894	TRUE
CDKAL1	0.569446	0.434699	FALSE
CDKL2	0.118309	-0.0715401	FALSE
CDKL3	0.418724	0.0471815	FALSE
CDKN1A	0.0269958	0.583988	TRUE
CDKN1B	0.26533	0.558266	TRUE
CDKN1C	0.228894	0.552168	FALSE
CDKN2A	0.366482	0.541769	TRUE
CDKN2AIP	0.552388	0.536444	FALSE
CDKN2AIPNL	0.421712	0.127172	FALSE
CDKN2C	0.114215	0.467576	FALSE
CDPF1	0.454106	0.231088	FALSE
CDR2	0.363988	0.55666	FALSE
CDR2L	0.0954665	0.283302	FALSE
CDS2	0.395777	0.0876245	FALSE
CDV3	0.403813	0.609287	FALSE
CDYL	0.501301	0.569324	TRUE
CDYL2	-0.200295	0.664029	FALSE
CEACAM1	0.247411	0.531619	FALSE
CEACAM5	0.106259	0.588535	FALSE
CEACAM6	0.0995728	0.548486	FALSE
CEBPA	0.0609805	0.361939	TRUE
CEBPB	0.264733	0.767276	FALSE
CEBPD	0.162923	0.338383	FALSE
CEBPG	0.582669	0.445597	FALSE
CEBPZ	0.350261	0.473533	FALSE
CECR1	-0.0623896	0.540944	FALSE
CECR5	0.437564	0.53374	FALSE
CEL	0.0839535	0.54803	FALSE
CELF1	0.367085	0.377816	FALSE
CELF2	-0.131314	0.598193	FALSE
CELSR1	-0.0381053	0.784126	FALSE
CELSR2	0.102416	0.753599	FALSE
CENPB	0.302514	0.0955023	TRUE
CENPC	0.42519	0.0508127	TRUE
CENPE	0.142955	0.129089	FALSE
CENPF	0.371162	0.751438	FALSE
CENPH	0.0929904	0.566223	TRUE
CENPJ	0.412413	0.0519888	FALSE
CENPM	0.252689	0.317076	TRUE
CENPQ	0.470611	0.231771	TRUE
CENPV	0.295019	0.696613	FALSE
CEP104	0.556282	-0.0139697	FALSE
CEP112	0.00350234	0.613358	FALSE
CEP120	0.628793	0.496215	FALSE
CEP128	0.323661	0.167776	FALSE
CEP135	0.28689	0.328574	FALSE
CEP152	-0.0750085	0.381545	FALSE
CEP164	0.364003	0.0247254	TRUE
CEP170	0.197674	0.377183	FALSE
CEP170B	0.389418	0.216184	FALSE
CEP192	0.473727	0.258406	FALSE
CEP250	0.512717	0.495448	FALSE
CEP290	0.520105	0.253323	TRUE
CEP350	0.499412	0.298513	FALSE
CEP41	0.418014	0.391024	FALSE
CEP44	0.603491	0.459502	FALSE
CEP55	0.222564	0.719624	TRUE
CEP57	0.605694	0.411456	FALSE
CEP63	0.46761	0.08381	FALSE
CEP68	0.147518	0.399376	FALSE
CEP76	0.614859	0.407185	FALSE
CEP78	0.290897	0.251463	FALSE
CEP85	0.348237	0.405285	FALSE
CEP89	0.567294	0.316308	FALSE
CEP95	0.7	0.3	FALSE
CEP97	0.395781	0.450507	FALSE
CERCAM	0.182882	0.606207	FALSE
CERS2	0.385705	0.476824	FALSE
CERS4	0.0220165	0.613721	FALSE
CERS5	0.261586	0.105109	FALSE
CERS6	0.0421444	0.562552	FALSE
CES1	0.121558	0.847955	FALSE
CES2	0.381681	0.427726	FALSE
CETN3	0.487193	0.398621	FALSE
CETP	0.181485	0.167191	FALSE
CFB	-0.0162559	0.214921	FALSE
CFD	0.021824	0.449198	FALSE
CFDP1	0.689423	0.581113	FALSE
CFH	-0.246588	0.523292	FALSE
CFHR1	-0.321234	0.342696	FALSE
CFHR2	-0.857143	0.571429	FALSE
CFHR3	-0.241695	0.504	FALSE
CFHR4	-0.00969251	0.00626432	FALSE
CFHR5	-0.211013	0.173279	FALSE
CFI	0.0343537	0.482382	FALSE
CFL1	0.347783	0.33485	TRUE
CFL2	0.224793	0.700113	FALSE
CFLAR	0.470067	0.347474	TRUE
CGA	0.0646918	0.431021	FALSE
CGGBP1	0.62128	0.450772	FALSE
CGN	0.279101	0.860261	FALSE
CGNL1	0.36579	0.862442	FALSE
CGREF1	0.198072	0.578656	FALSE
CHAC2	0.30107	0.723231	FALSE
CHAD	0.0882374	0.661479	TRUE
CHAF1A	0.253381	0.719841	TRUE
CHAF1B	0.402407	0.698877	TRUE
CHAMP1	0.692919	0.315467	FALSE
CHCHD1	0.617278	0.0299219	FALSE
CHCHD10	0.162682	0.262665	FALSE
CHCHD2	0.52341	0.333487	FALSE
CHCHD3	0.608327	0.163862	TRUE
CHCHD4	0.541059	0.400579	FALSE
CHCHD5	0.0749541	0.490855	FALSE
CHCHD6	0.309863	0.295085	TRUE
CHCHD7	0.506246	0.457467	FALSE
CHD1	0.488814	0.362213	FALSE
CHD1L	0.423351	0.475635	FALSE
CHD2	0.651324	0.153228	FALSE
CHD3	0.247614	0.507463	TRUE
CHD4	0.367701	0.318811	TRUE
CHD5	0.259195	-0.0988008	FALSE
CHD6	0.242987	0.256989	FALSE
CHD7	0.367095	0.457338	FALSE
CHD8	0.316067	0.173359	TRUE
CHD9	0.398705	0.275952	FALSE
CHDH	0.417741	0.810806	FALSE
CHEK1	0.221985	0.632336	TRUE
CHEK2	0.405751	0.722348	TRUE
CHERP	0.456868	0.415513	TRUE
CHFR	0.340119	0.205733	FALSE
CHGA	-0.247315	0.427363	FALSE
CHGB	0.0376562	0.0908994	FALSE
CHI3L1	-0.0243738	0.512613	FALSE
CHI3L2	0.176093	0.758489	FALSE
CHID1	0.390956	0.382309	FALSE
CHIT1	-0.230555	0.540544	FALSE
CHKA	0.550156	0.447764	FALSE
CHKB	0.329565	0.163475	FALSE
CHL1	-0.0262209	0.512303	FALSE
CHML	0.176419	0.472965	FALSE
CHMP1A	0.639736	0.332231	TRUE
CHMP1B	0.700475	0.436814	TRUE
CHMP2A	0.279029	0.446962	TRUE
CHMP2B	0.460863	0.45598	TRUE
CHMP3	0.368564	0.344253	TRUE
CHMP4A	0.484775	0.186723	TRUE
CHMP4B	0.311831	0.394887	TRUE
CHMP4C	0.615633	0.522	TRUE
CHMP5	0.214055	0.46479	TRUE
CHMP6	0.571999	0.454255	TRUE
CHMP7	0.756435	0.610256	FALSE
CHN1	0.286604	0.495091	FALSE
CHN2	0.109865	0.595968	FALSE
CHORDC1	0.609362	0.447481	FALSE
CHP1	0.383805	0.311978	FALSE
CHPF	0.0303705	0.433507	FALSE
CHPF2	0.413815	0.285198	FALSE
CHPT1	0.235785	0.688573	FALSE
CHRAC1	0.714451	0.687127	TRUE
CHRD	-0.0626465	0.607533	FALSE
CHST14	0.323698	0.344024	FALSE
CHST15	0.255831	0.631549	FALSE
CHST3	0.115054	0.572688	FALSE
CHSY1	0.366355	0.205591	FALSE
CHTF18	0.298224	0.433702	TRUE
CHTF8	0.464997	0.195229	TRUE
CHTOP	0.564051	0.154458	TRUE
CHUK	0.389099	0.328282	TRUE
CIAPIN1	0.732287	0.540422	FALSE
CIB1	0.333301	0.350874	TRUE
CIC	0.306954	0.289884	TRUE
CILP	0.173135	0.814368	FALSE
CILP2	-0.034416	0.718826	FALSE
CINP	0.521689	0.234006	FALSE
CIR1	0.471583	0.196484	FALSE
CIRBP	0.345001	0.778852	TRUE
CISD1	0.271665	0.348433	FALSE
CISD2	0.315569	0.0156191	TRUE
CISD3	0.364398	0.475062	FALSE
CIT	0.230413	0.587164	FALSE
CITED2	0.443685	0.47935	FALSE
CIZ1	0.32706	0.248069	FALSE
CKAP2	0.266202	0.573385	FALSE
CKAP4	0.280086	0.632947	FALSE
CKAP5	0.476823	0.538889	TRUE
CKB	0.116032	0.679065	TRUE
CKM	-0.0365602	0.156913	FALSE
CKMT1B	0.183634	0.803184	FALSE
CKMT2	-0.034513	0.421873	FALSE
CKS1B	0.54649	0.632912	TRUE
CKS2	0.419061	0.501515	FALSE
CLASP1	0.668535	0.483664	FALSE
CLASP2	0.34838	0.338295	FALSE
CLASRP	0.116464	0.196134	FALSE
CLC	0.0636816	0.472247	FALSE
CLCA2	-0.0503621	0.688398	FALSE
CLCC1	0.275936	0.266548	FALSE
CLCN3	0.702016	0.380259	FALSE
CLCN7	0.562346	0.260626	FALSE
CLDN3	0.223745	0.555913	FALSE
CLDN7	0.33619	0.200289	FALSE
CLDND1	0.345288	0.0635633	FALSE
CLEC11A	-0.0485417	0.504463	FALSE
CLEC14A	0.250885	0.523077	FALSE
CLEC16A	0.50479	0.227892	FALSE
CLEC3A	-0.117776	0.628129	FALSE
CLEC3B	0.104541	0.217847	FALSE
CLGN	0.216735	0.81183	FALSE
CLIC1	0.398611	0.337171	FALSE
CLIC3	0.237979	0.642399	FALSE
CLIC4	0.248671	0.680779	FALSE
CLIC5	0.153267	0.593958	TRUE
CLIC6	-0.180382	0.757049	FALSE
CLINT1	0.188835	0.2457	FALSE
CLIP1	0.342452	0.627605	TRUE
CLIP2	0.234561	0.627184	FALSE
CLIP4	0.261871	0.219648	FALSE
CLK1	0.19821	0.0612833	FALSE
CLK2	0.436987	0.315076	FALSE
CLK3	0.456888	0.147171	FALSE
CLMN	0.367273	0.631137	FALSE
CLN5	0.651874	0.680117	FALSE
CLNS1A	0.612854	0.575583	TRUE
CLOCK	0.521344	0.200096	TRUE
CLP1	0.723058	0.308588	TRUE
CLPB	0.540395	0.560431	FALSE
CLPP	0.406071	0.374227	TRUE
CLPTM1	0.408195	0.174221	FALSE
CLPTM1L	0.424777	0.32355	FALSE
CLPX	0.481426	0.0638986	TRUE
CLSPN	0.326254	0.165701	FALSE
CLSTN1	0.409862	0.415484	FALSE
CLSTN2	0.135516	0.800691	FALSE
CLSTN3	0.349949	0.440522	FALSE
CLTA	0.568733	0.192277	FALSE
CLTB	0.118633	0.237462	FALSE
CLU	0.360796	0.327978	FALSE
CLUAP1	0.317375	0.320623	FALSE
CLUH	0.397682	0.525506	FALSE
CLYBL	0.412903	0.686368	FALSE
CMA1	0.0557825	0.602322	FALSE
CMAS	0.606493	0.461664	FALSE
CMBL	0.0737695	0.854326	FALSE
CMC1	0.572553	0.156688	TRUE
CMC2	0.614317	0.518851	FALSE
CMIP	0.382629	0.516828	FALSE
CMPK1	0.506848	0.614151	FALSE
CMPK2	0.20122	0.763519	FALSE
CMSS1	0.158002	0.48535	FALSE
CMTM4	0.463237	0.337473	FALSE
CNBP	0.436386	0.108704	FALSE
CNDP1	0.3481	-0.0321491	FALSE
CNDP2	0.526213	0.609562	FALSE
CNGB3	-0.0714286	-0.301754	FALSE
CNKSR1	0.312201	0.369026	TRUE
CNKSR3	0.368599	0.685434	FALSE
CNN1	0.176801	0.812848	FALSE
CNN2	0.131105	0.674847	FALSE
CNN3	0.381442	0.648644	TRUE
CNNM3	0.0962562	0.459502	FALSE
CNNM4	0.128964	0.519743	FALSE
CNOT11	0.550935	0.0309661	TRUE
CNOT4	0.291571	0.29419	FALSE
CNOT6	0.488549	0.216971	TRUE
CNOT6L	0.49027	0.415912	TRUE
CNOT7	0.70478	0.427788	TRUE
CNOT8	0.442937	0.194471	TRUE
CNP	0.19891	0.471623	FALSE
CNPY2	0.251491	0.308659	FALSE
CNPY3	0.408927	0.450019	FALSE
CNPY4	0.473927	0.559073	FALSE
CNRIP1	-0.064389	0.659396	FALSE
CNST	0.438989	0.512512	FALSE
CNTFR	0.117995	0.579155	TRUE
CNTLN	0.325364	0.0403361	FALSE
CNTN1	0.0308938	0.550632	FALSE
CNTN4	0.0467455	-0.0541653	FALSE
CNTNAP2	-0.102394	0.149573	FALSE
CNTNAP4	0.0553351	-0.0959124	FALSE
CNTRL	0.2313	0.319651	FALSE
CNTROB	0.426297	0.2377	FALSE
COA1	0.406689	0.212582	TRUE
COA3	0.609375	0.431445	TRUE
COA4	0.740793	0.384755	FALSE
COA5	0.49298	0.242472	FALSE
COA6	0.582564	0.29904	FALSE
COASY	0.512694	0.411079	FALSE
COBL	0.11539	0.795652	FALSE
COBLL1	0.0874504	0.694886	TRUE
COCH	-0.00888224	0.48879	FALSE
COG1	0.632795	0.466928	TRUE
COG2	0.580508	0.354354	TRUE
COG3	0.641822	0.576786	TRUE
COG4	0.567864	0.0837253	TRUE
COG5	0.573467	0.247138	TRUE
COG6	0.490976	0.377394	TRUE
COG7	0.624324	0.424915	TRUE
COG8	0.396247	0.0126193	TRUE
COIL	0.816496	0.700966	TRUE
COL10A1	-0.195722	0.730349	FALSE
COL11A1	-0.100452	0.809795	FALSE
COL11A2	0.170841	0.119288	FALSE
COL12A1	-0.070378	0.734856	FALSE
COL14A1	-0.380241	0.798875	FALSE
COL15A1	0.151015	0.616801	FALSE
COL16A1	0.31498	0.425123	FALSE
COL17A1	0.0476657	0.679073	FALSE
COL18A1	0.163505	0.339955	TRUE
COL1A1	-0.0919425	0.643367	TRUE
COL1A2	-0.0258322	0.712571	FALSE
COL21A1	0.0391954	0.165002	FALSE
COL22A1	0.13601	0.109236	FALSE
COL24A1	0.0411681	0.242525	FALSE
COL27A1	-0.0357203	0.116933	FALSE
COL28A1	0.123202	0.0709155	FALSE
COL2A1	0.0950299	0.268743	FALSE
COL3A1	-0.224651	0.726767	FALSE
COL4A1	0.261983	0.461736	FALSE
COL4A2	0.313254	0.538397	FALSE
COL4A3	0.197024	0.205356	TRUE
COL4A3BP	0.437524	0.730562	FALSE
COL4A4	0.330361	0.0196044	FALSE
COL5A1	0.220667	0.718951	FALSE
COL5A2	-0.182381	0.698375	FALSE
COL5A3	0.121094	0.524316	FALSE
COL6A1	0.153431	0.468041	FALSE
COL6A2	0.138304	0.467796	FALSE
COL6A3	-0.0895947	0.729503	TRUE
COL6A5	-0.132056	0.142986	FALSE
COL6A6	-0.201581	0.51384	FALSE
COL7A1	0.180203	0.425552	FALSE
COL8A1	-0.0585395	0.707833	FALSE
COL8A2	0.0644128	0.547542	FALSE
COL9A1	0.198665	-0.0711081	FALSE
COL9A2	0.252929	0.419534	FALSE
COL9A3	0.24021	0.577874	FALSE
COLEC10	0.15405	0.227894	FALSE
COLEC12	-0.050232	0.71041	FALSE
COLGALT1	0.569868	0.680411	TRUE
COLGALT2	0.0270388	0.049785	FALSE
COMMD1	0.399308	0.24768	TRUE
COMMD10	0.686083	0.426246	TRUE
COMMD2	0.302695	0.263924	TRUE
COMMD3	0.239878	0.024004	TRUE
COMMD4	0.316463	0.00586641	TRUE
COMMD5	0.564805	0.0858082	TRUE
COMMD6	0.326889	0.146094	TRUE
COMMD7	0.438583	0.10307	TRUE
COMMD8	0.398889	0.245499	TRUE
COMMD9	0.420193	0.20032	TRUE
COMP	-0.0872227	0.81189	FALSE
COMT	0.338821	0.593306	FALSE
COMTD1	0.402622	0.332037	FALSE
COPA	0.488874	0.13892	FALSE
COPB1	0.444073	0.281175	FALSE
COPB2	0.320592	0.455563	TRUE
COPE	0.437712	0.0466491	FALSE
COPG1	0.284834	0.475159	FALSE
COPG2	0.23075	0.547296	FALSE
COPRS	0.544207	0.338434	TRUE
COPS2	0.314808	0.118957	TRUE
COPS4	0.370521	0.354593	TRUE
COPS5	0.710674	-0.189977	TRUE
COPS6	0.502773	-0.0525443	TRUE
COPS7A	0.477636	0.216509	TRUE
COPS7B	0.56613	0.371815	FALSE
COPS8	0.573613	0.21412	TRUE
COPZ1	0.448766	0.264342	FALSE
COPZ2	0.0141755	0.817521	FALSE
COQ10B	0.375574	0.280708	FALSE
COQ3	0.334225	0.274135	FALSE
COQ5	0.505864	0.0272123	FALSE
COQ6	0.522748	0.154271	FALSE
COQ7	0.595346	0.345106	FALSE
COQ9	0.584766	0.160918	FALSE
CORO1A	-0.0586128	0.672951	FALSE
CORO1B	0.40337	0.365074	FALSE
CORO1C	0.0970931	0.614197	FALSE
CORO2A	0.335954	0.809438	TRUE
CORO2B	0.162676	0.823991	FALSE
CORO6	-0.0286248	-0.119723	FALSE
CORO7	0.317595	0.117242	FALSE
COTL1	0.488005	0.670096	FALSE
COX11	0.439726	0.389864	FALSE
COX15	0.470167	0.31327	TRUE
COX17	0.339032	0.489667	FALSE
COX19	0.433299	0.14958	FALSE
COX20	0.114286	0.075	FALSE
COX4I1	0.665956	0.0574944	TRUE
COX5A	0.24038	0.233074	TRUE
COX5B	0.476336	0.0669583	FALSE
COX6A1	0.43451	-0.0605509	FALSE
COX6B1	0.538649	0.0515794	FALSE
COX6C	0.150549	0.312884	TRUE
COX7A1	-0.040601	0.670608	FALSE
COX7A2	0.60856	-0.0808835	FALSE
COX7A2L	0.363769	-0.020382	FALSE
COX7C	0.562262	0.0875189	FALSE
COX8A	0.447813	0.0685425	FALSE
CP	0.0992128	-0.115906	TRUE
CPA3	-0.344355	0.643448	FALSE
CPA4	0.437588	0.468411	FALSE
CPB1	0.063253	0.237665	FALSE
CPB2	0.273109	0.260183	FALSE
CPD	0.552294	0.597318	FALSE
CPE	0.305413	0.664293	FALSE
CPEB2	0.380382	0.557595	FALSE
CPEB4	0.49296	0.424937	FALSE
CPLX2	-0.138485	0.793602	TRUE
CPM	0.149582	0.552757	FALSE
CPN1	0.5	0.6	TRUE
CPN2	0.0766575	0.169337	TRUE
CPNE1	0.630393	0.489236	FALSE
CPNE2	0.520142	0.75237	FALSE
CPNE3	0.372837	0.538027	FALSE
CPNE8	-0.120199	0.71084	FALSE
CPOX	0.371136	0.459896	FALSE
CPPED1	0.121471	0.703658	FALSE
CPQ	0.194948	0.733858	FALSE
CPS1	-0.148969	0.293757	FALSE
CPSF1	0.542485	0.348181	TRUE
CPSF3	0.701926	0.480227	TRUE
CPSF4	0.421559	0.392927	TRUE
CPSF6	0.103131	0.150389	TRUE
CPSF7	0.555488	0.501535	TRUE
CPT1A	0.384156	0.600345	FALSE
CPT2	0.285819	0.485348	FALSE
CPVL	3.11018e-05	0.452107	FALSE
CPXM1	0.139745	0.799485	FALSE
CPXM2	-0.037068	0.720872	FALSE
CPZ	0.0704566	0.529678	FALSE
CRABP1	0.0711262	0.748102	FALSE
CRABP2	0.180672	0.796152	FALSE
CRADD	0.363356	0.205862	TRUE
CRAT	0.392455	0.860026	FALSE
CRBN	0.493535	0.516273	TRUE
CRCP	0.221956	0.0131551	FALSE
CREB1	0.252385	0.114688	TRUE
CREB3L4	0.432131	0.561331	FALSE
CREB5	0.10106	0.208647	FALSE
CREBBP	0.563603	0.597749	TRUE
CREG1	0.26548	0.372232	FALSE
CRELD1	0.361876	0.491173	FALSE
CRELD2	0.490843	0.558762	FALSE
CRIM1	-0.132356	0.54427	FALSE
CRIP1	0.244435	0.776504	FALSE
CRIP2	0.0288725	0.507177	FALSE
CRIPT	0.266138	0.273495	FALSE
CRISP3	0.00615603	0.411492	FALSE
CRISPLD1	0.127427	0.650319	FALSE
CRISPLD2	0.237499	0.714092	FALSE
CRK	0.489087	0.300271	TRUE
CRKL	0.545022	0.429855	FALSE
CRLF1	0.251918	0.544251	FALSE
CRLF3	0.48066	0.554552	FALSE
CRMP1	0.747155	0.78022	TRUE
CRNKL1	0.564103	0.479355	TRUE
CROCC	0.219497	0.403062	FALSE
CROT	0.23168	0.829681	FALSE
CRP	-0.20051	-0.104417	FALSE
CRTAC1	-0.215328	0.407434	FALSE
CRTAP	0.289834	0.358614	FALSE
CRTC1	0.14833	0.401398	FALSE
CRTC2	0.397488	0.056655	FALSE
CRTC3	0.677636	0.617939	FALSE
CRY2	0.253076	0.228807	TRUE
CRYAB	0.252511	0.799275	FALSE
CRYBB1	-0.0311206	0.303742	FALSE
CRYBG3	0.107392	0.691539	FALSE
CRYL1	0.274618	0.641426	FALSE
CRYM	0.145565	0.622178	FALSE
CRYZ	0.22535	0.69418	FALSE
CRYZL1	0.429436	0.570807	FALSE
CS	0.216139	0.182314	TRUE
CSAD	0.308522	0.628685	FALSE
CSDE1	0.598028	0.491109	TRUE
CSE1L	0.57611	0.683287	FALSE
CSF1	0.17238	0.447135	FALSE
CSF1R	0.119207	0.335939	FALSE
CSK	0.289861	0.560493	FALSE
CSMD3	0.1	0.5	FALSE
CSN3	0.10728	0.515661	FALSE
CSNK1A1	0.509289	0.0200548	FALSE
CSNK1E	0.565312	0.154811	FALSE
CSNK1G1	0.570493	0.199814	FALSE
CSNK1G3	0.584739	0.0733683	FALSE
CSNK2A2	0.499308	0.48729	TRUE
CSPG4	0.0871483	0.641437	TRUE
CSPP1	0.548471	0.21949	FALSE
CSRP1	0.0129071	0.526649	FALSE
CSRP2	-0.361341	0.467598	FALSE
CSRP3	-0.1	0.7	FALSE
CST3	0.182244	0.613756	FALSE
CST4	-0.0812742	0.575721	FALSE
CST5	-0.109291	0.511687	FALSE
CST6	0.126619	0.557831	FALSE
CSTA	-0.10243	0.671497	FALSE
CSTB	0.475047	0.411575	FALSE
CSTF1	0.599473	0.458188	TRUE
CSTF2T	0.509219	0.248671	FALSE
CSTF3	0.417936	0.206258	TRUE
CTAGE1	-0.0618806	-0.0149613	FALSE
CTAGE5	0.552606	0.505818	TRUE
CTBP1	0.459939	0.0471782	TRUE
CTBP2	0.450225	0.650698	TRUE
CTBS	0.378375	-0.0413818	FALSE
CTC1	0.347132	0.181123	TRUE
CTCF	0.398187	0.154023	TRUE
CTCFL	0.261654	0.0344438	FALSE
CTDP1	0.53782	0.405382	TRUE
CTDSP1	0.280731	0.356283	FALSE
CTDSPL2	0.4229	0.318283	FALSE
CTF1	0.286684	0.526307	FALSE
CTGF	-0.19045	0.671349	TRUE
CTH	0.297664	0.761374	FALSE
CTHRC1	-0.0130565	0.725868	FALSE
CTIF	0.419467	0.56884	FALSE
CTNNA1	0.512837	0.252544	TRUE
CTNNB1	0.646713	0.167362	TRUE
CTNNBIP1	0.44731	0.369508	FALSE
CTNNBL1	0.608065	0.262378	TRUE
CTNND1	0.630717	0.277953	TRUE
CTNND2	0.163273	0.76967	TRUE
CTPS1	0.662467	0.816688	FALSE
CTSA	0.519228	0.401768	TRUE
CTSB	0.18732	0.526523	FALSE
CTSC	0.181238	0.638822	FALSE
CTSD	0.183254	0.602466	FALSE
CTSF	0.175764	0.575707	FALSE
CTSG	0.021328	0.452617	TRUE
CTSH	0.240531	0.541248	FALSE
CTSK	-0.143842	0.823251	FALSE
CTSL	0.135317	0.477999	FALSE
CTSO	0.456879	0.608901	FALSE
CTSS	-0.10477	0.629464	FALSE
CTSV	0.0212842	0.237502	FALSE
CTSW	0.117324	0.617071	FALSE
CTSZ	0.172505	0.509671	FALSE
CTTN	0.6055	0.442755	TRUE
CTTNBP2	-0.042155	0.281192	FALSE
CTTNBP2NL	0.163563	0.575978	FALSE
CTU1	0.0678675	0.244157	FALSE
CTU2	0.402198	0.296429	FALSE
CUEDC1	0.190739	0.533031	FALSE
CUEDC2	0.460816	0.431058	FALSE
CUL1	0.603165	0.596001	TRUE
CUL2	0.555249	0.613153	TRUE
CUL4A	0.82128	0.652445	TRUE
CUL5	0.448871	0.46177	TRUE
CUL7	0.338973	0.114619	TRUE
CUL9	0.383235	0.272976	TRUE
CUTA	0.306426	0.166819	FALSE
CUTC	0.456677	0.430333	FALSE
CUX1	0.175663	0.509843	FALSE
CWC15	0.549215	0.120762	TRUE
CWC22	0.343712	0.288424	TRUE
CWC25	0.699224	0.396129	FALSE
CWC27	0.381907	0.475892	TRUE
CWF19L1	0.554191	0.562739	FALSE
CWF19L2	0.558744	0.594714	FALSE
CXADR	0.328392	0.742072	FALSE
CXCL10	0.0962126	0.608871	FALSE
CXCL12	-0.00694793	0.697276	FALSE
CXCL13	-0.0272884	0.549584	FALSE
CXCL14	0.266445	0.692113	FALSE
CXCL9	0.120307	0.751922	FALSE
CXXC1	0.57509	0.178795	TRUE
CXXC5	0.499739	0.546707	FALSE
CYB5A	0.352754	0.815512	FALSE
CYB5B	0.424689	0.231501	FALSE
CYB5R1	0.351701	0.534309	FALSE
CYB5R2	0.155804	0.756652	FALSE
CYB5R3	0.324214	0.432544	FALSE
CYB5R4	0.500916	0.494552	FALSE
CYBA	0.324565	0.315738	FALSE
CYBRD1	0.0357736	0.719056	FALSE
CYC1	0.637428	0.581524	FALSE
CYCS	0.2931	0.338546	TRUE
CYFIP1	0.477704	0.102829	TRUE
CYFIP2	0.301281	0.649219	FALSE
CYGB	-0.0540333	0.483308	FALSE
CYHR1	0.549506	0.335814	FALSE
CYLD	0.51772	0.566039	TRUE
CYP1B1	0.284066	0.682461	FALSE
CYP20A1	0.341551	0.159427	FALSE
CYP27A1	0.211215	0.743983	FALSE
CYP2A6	0.123973	0.280919	FALSE
CYP2J2	0.241774	0.468089	FALSE
CYP2S1	-0.000692928	0.34663	FALSE
CYP4X1	-0.0881901	0.687437	FALSE
CYP4Z1	-0.125721	0.741497	FALSE
CYP51A1	0.466901	0.538278	FALSE
CYP7B1	0.0195735	0.438607	FALSE
CYR61	0.052777	0.43426	TRUE
CYTH1	0.429424	0.409162	FALSE
CYTH2	0.298933	0.136115	FALSE
CYTH3	0.173992	0.502156	TRUE
CYTH4	0.0166912	0.448697	FALSE
CYTIP	0.125448	0.332695	FALSE
D2HGDH	-0.00551341	0.269211	FALSE
DAAM1	0.569193	0.542054	FALSE
DAAM2	0.0598365	0.185009	FALSE
DAB2	0.026699	0.84056	FALSE
DACH1	-0.0474031	0.864689	FALSE
DAD1	0.552815	-0.00779308	TRUE
DAG1	0.435501	0.473957	TRUE
DAGLB	0.502243	0.0996357	FALSE
DALRD3	0.103017	-0.309091	FALSE
DAP	0.306362	0.403529	FALSE
DAP3	0.595884	0.251268	TRUE
DAPK1	0.0592061	0.537765	FALSE
DAPK2	0.130271	0.551784	FALSE
DAPK3	0.321082	0.162539	FALSE
DAPP1	-0.0310786	0.725095	FALSE
DARS	0.617528	0.563448	TRUE
DARS2	0.580631	0.461948	FALSE
DAXX	0.224041	0.339068	TRUE
DAZAP1	0.25962	0.202908	FALSE
DAZAP2	0.606616	0.327277	FALSE
DBI	0.36743	0.492957	FALSE
DBN1	0.0109979	0.475378	FALSE
DBNDD1	0.530935	0.467675	FALSE
[truncated: 7,129 more rows]

## Sheet: S2D.OV.corr.table
S2D. Spearman's DNA-RNA Corr and RNA-Pro Corr for each gene in OV
gene	DNA-RNA Corr	RNA-Pro Corr	CORUM complex
AAAS	0.530786	0.201265	FALSE
AACS	0.564889	0.493293	FALSE
AAGAB	0.391322	0.425745	FALSE
AAMDC	0.387679	0.365313	FALSE
AAMP	0.682944	0.598569	FALSE
AAR2	0.485021	0.379977	FALSE
AASDH	0.508417	0.195565	FALSE
AASDHPPT	0.58825	0.5507	FALSE
AASS	0.166097	0.603862	FALSE
AATF	0.533634	0.145438	FALSE
ABAT	0.35565	0.696199	FALSE
ABCA1	0.33047	0.455104	FALSE
ABCA6	-0.0412932	0.0720696	FALSE
ABCA8	-0.0430235	0.381453	FALSE
ABCB1	-0.233141	0.442857	TRUE
ABCB10	0.458743	0.4229	FALSE
ABCB6	0.261746	0.288449	FALSE
ABCB8	0.0968369	0.174089	FALSE
ABCC1	0.422803	0.367525	FALSE
ABCC10	0.38373	0.154443	FALSE
ABCC3	0.215942	0.295325	FALSE
ABCC4	0.241845	0.669467	FALSE
ABCC5	0.210007	-0.217582	FALSE
ABCC9	-0.0905803	0.075521	TRUE
ABCD3	0.521384	0.5965	FALSE
ABCD4	0.571096	0.242503	FALSE
ABCE1	0.57889	0.59379	FALSE
ABCF3	0.789064	0.679697	FALSE
ABHD10	0.599287	0.511179	FALSE
ABHD11	0.385775	0.601807	FALSE
ABHD12	0.409025	0.505104	FALSE
ABHD17A	0.497046	-0.0137346	FALSE
ABHD17B	0.665154	0.0569531	FALSE
ABHD17C	0.690782	0.103452	FALSE
ABHD4	0.634121	0.353115	FALSE
ABHD5	0.382082	0.137088	FALSE
ABHD6	0.382263	0.344538	FALSE
ABI1	0.566731	0.443815	TRUE
ABI2	0.51115	0.0795393	FALSE
ABI3BP	0.105217	0.538573	FALSE
ABL1	0.553329	0.257565	TRUE
ABL2	0.224759	0.0522625	FALSE
ABLIM2	0.257662	0.565414	FALSE
ABR	0.238673	0.351974	FALSE
ABRACL	0.396338	0.396116	FALSE
ABT1	0.527982	0.264525	FALSE
ACAA1	0.461254	0.568428	FALSE
ACAA2	0.369978	0.560804	FALSE
ACACA	0.222425	0.28243	FALSE
ACACB	0.160936	0.0638	FALSE
ACAD8	0.624079	0.638008	TRUE
ACAD9	0.648368	0.512489	FALSE
ACADM	0.445039	0.43846	FALSE
ACADS	0.234532	0.453319	FALSE
ACADSB	0.541527	0.696522	FALSE
ACADVL	0.58699	0.601446	FALSE
ACAN	0.142044	0.424772	FALSE
ACAP1	0.0368603	0.362408	TRUE
ACAP2	0.613529	0.461789	FALSE
ACAP3	0.39858	0.0306837	FALSE
ACAT2	0.332635	0.69551	FALSE
ACBD3	0.441225	0.525542	FALSE
ACBD5	0.460306	0.395744	FALSE
ACBD7	0.153381	0.722425	FALSE
ACE	0.0194017	0.448374	FALSE
ACIN1	0.381516	0.00832251	TRUE
ACLY	0.530147	0.534011	FALSE
ACO1	0.542439	0.728494	FALSE
ACO2	0.577334	0.488934	FALSE
ACOT1	0.319521	0.549619	FALSE
ACOT11	0.120088	0.511001	FALSE
ACOT13	0.0707942	0.285732	FALSE
ACOT2	0.216374	0.386509	FALSE
ACOT4	0.18601	-0.32478	FALSE
ACOT7	0.380643	0.658853	FALSE
ACOT8	0.494587	0.520535	FALSE
ACOX1	0.542244	0.454313	FALSE
ACOX2	0.252618	0.552621	FALSE
ACOX3	0.628135	0.328026	FALSE
ACP1	0.661453	0.532836	FALSE
ACP2	0.465761	0.448735	FALSE
ACP5	0.106813	0.703965	FALSE
ACPP	0.26547	0.690176	FALSE
ACSF2	0.470469	0.736089	FALSE
ACSF3	0.453992	0.360547	FALSE
ACSL1	0.351736	0.826762	FALSE
ACSL3	0.310507	0.615447	FALSE
ACSL5	0.232858	0.6965	FALSE
ACSL6	0.0143502	0.142322	FALSE
ACSM3	0.311562	0.613876	FALSE
ACSS1	0.105911	0.459277	FALSE
ACSS2	0.328408	0.584395	FALSE
ACSS3	0.210005	0.80472	FALSE
ACTA1	0.230164	0.0233055	FALSE
ACTB	0.135989	0.414386	TRUE
ACTBL2	0.228675	0.136104	FALSE
ACTG1	0.561274	0.205126	TRUE
ACTG2	0.0409709	0.732498	TRUE
ACTL6A	0.639663	0.203975	TRUE
ACTL8	0.107418	0.543102	FALSE
ACTN1	0.275797	0.386949	TRUE
ACTN2	0.255955	0.158436	FALSE
ACTR10	0.454694	-0.0309846	FALSE
ACTR1A	0.481797	0.548148	FALSE
ACTR1B	0.391067	0.506481	FALSE
ACTR2	0.307201	0.365402	TRUE
ACTR3	0.286114	0.495686	TRUE
ACTR3B	0.662575	-0.13925	FALSE
ACTR5	0.507866	0.271522	TRUE
ACTR6	0.277725	0.375324	TRUE
ACTR8	0.591636	0.419502	TRUE
ACVR1	0.273279	0.325687	FALSE
ACY3	0.0914853	0.8	FALSE
ACYP1	0.456842	0.599294	FALSE
ACYP2	0.281548	0.467194	FALSE
ADA	0.320206	0.752687	TRUE
ADAL	0.542302	0.221958	FALSE
ADAM10	0.575448	0.472493	FALSE
ADAM12	-0.286701	0.407115	TRUE
ADAM15	0.262189	0.313125	TRUE
ADAM17	0.539027	0.427516	FALSE
ADAM28	0.27136	0.548872	FALSE
ADAM9	0.132645	0.515784	TRUE
ADAMDEC1	-0.00344498	0.724444	FALSE
ADAMTS1	0.407277	0.608175	FALSE
ADAMTS12	-0.0602602	0.485385	FALSE
ADAMTS16	0.0876268	0.474368	FALSE
ADAMTS2	-0.0848647	0.23302	FALSE
ADAMTS4	-0.310802	0.44085	FALSE
ADAMTS5	0.0447989	0.362903	FALSE
ADAMTSL1	0.20847	0.679359	FALSE
ADAMTSL2	0.193895	0.278629	FALSE
ADAMTSL3	0.0255806	0.431452	FALSE
ADAR	0.222351	0.113753	TRUE
ADARB1	0.247386	0.59939	FALSE
ADAT1	0.594987	0.291925	FALSE
ADCK1	0.283479	0.155829	FALSE
ADCY3	-0.139083	0.173265	FALSE
ADCY5	0.159523	0.0869029	FALSE
ADCY6	0.128126	0.303455	FALSE
ADCY7	0.343185	0.367656	FALSE
ADD2	0.12696	0.680172	TRUE
ADD3	0.456412	0.521423	FALSE
ADH4	0.0392625	0.732153	FALSE
ADH5	0.711396	0.589995	FALSE
ADIPOQ	0.269476	0.447173	TRUE
ADK	0.349278	0.461856	FALSE
ADNP	0.510917	0.486796	FALSE
ADNP2	0.574765	0.210526	FALSE
ADO	0.573001	0.32509	FALSE
ADPGK	0.716555	0.49248	FALSE
ADPRH	0.280554	0.609883	FALSE
ADPRHL2	0.472386	0.375277	FALSE
ADRA2A	0.115966	0.472614	TRUE
ADRM1	0.370019	0.0863666	FALSE
ADSS	0.594846	0.479743	FALSE
ADSSL1	0.581846	0.394863	FALSE
AES	0.404251	0.335074	FALSE
AFAP1	0.437621	0.627123	FALSE
AFAP1L1	0.290394	0.450131	FALSE
AFAP1L2	0.23518	0.884417	FALSE
AFF4	0.435821	-0.00711382	TRUE
AFG3L2	0.607881	0.741215	TRUE
AFM	0.0740064	0.0206314	FALSE
AFMID	0.223076	-0.036797	FALSE
AFTPH	0.636524	0.510908	FALSE
AGA	0.482488	0.190765	FALSE
AGAP1	0.367792	0.442322	FALSE
AGAP2	0.133177	0.254579	FALSE
AGAP3	0.568808	0.621364	FALSE
AGFG2	0.424123	0.410411	FALSE
AGK	0.333559	0.507322	FALSE
AGL	0.402817	0.451739	FALSE
AGMAT	0.210184	0.742243	FALSE
AGO1	0.471038	0.154178	FALSE
AGO2	0.513739	0.41598	TRUE
AGO3	0.479727	0.0910117	FALSE
AGPAT2	0.698947	0.761066	FALSE
AGPAT3	0.565808	0.489002	FALSE
AGPAT4	0.380822	0.39498	FALSE
AGPAT5	0.626321	0.659304	FALSE
AGPS	0.27177	0.356098	TRUE
AGR2	-0.064444	0.572061	FALSE
AGR3	0.0929364	0.364613	FALSE
AGRN	0.452706	0.439341	FALSE
AGT	0.0185507	0.0268249	TRUE
AGTPBP1	0.577035	0.170097	FALSE
AGTRAP	0.483998	0.558098	FALSE
AHCTF1	0.423742	0.126423	FALSE
AHCY	0.424733	0.654088	FALSE
AHCYL1	0.501113	0.0618564	FALSE
AHCYL2	0.607247	0.0326447	FALSE
AHDC1	0.560194	0.246906	FALSE
AHNAK	0.0585675	0.100644	TRUE
AHNAK2	0.0256078	0.668722	FALSE
AHR	0.0673292	0.385329	TRUE
AHSA1	0.644897	0.737556	FALSE
AHSG	0.245829	0.023089	FALSE
AHSP	0.213539	0.469326	FALSE
AIDA	0.355296	0.359688	FALSE
AIF1L	0.379561	0.729172	FALSE
AIG1	0.488598	0.380524	FALSE
AIMP1	0.560702	0.419128	TRUE
AIMP2	0.393051	0.25952	TRUE
AIP	0.252398	0.522719	FALSE
AK2	0.449775	0.350678	FALSE
AK3	0.655959	0.70009	FALSE
AK5	-0.0549454	0.151197	FALSE
AKAP1	0.668357	0.639092	TRUE
AKAP10	0.687181	0.398464	FALSE
AKAP11	0.513123	0.176842	FALSE
AKAP12	0.287286	0.709598	FALSE
AKAP13	0.262532	0.42299	TRUE
AKAP5	0.19098	0.73399	TRUE
AKAP7	0.474504	0.265214	FALSE
AKAP9	0.48192	0.160163	TRUE
AKNA	0.274708	0.324812	FALSE
AKR1A1	0.127902	0.361064	FALSE
AKR1B1	0.279632	0.699232	FALSE
AKR1B10	0.0762158	-0.0894852	FALSE
AKR1C2	-0.133003	0.676107	FALSE
AKT1	0.741488	0.568225	TRUE
AKT1S1	0.344276	0.0937726	FALSE
AKT2	0.182966	0.287483	TRUE
AKT3	-0.204854	0.31758	FALSE
AKTIP	0.699552	0.287309	TRUE
ALAD	0.709789	0.424413	FALSE
ALAS1	0.436888	-0.0338462	FALSE
ALB	0.237448	0.0388552	FALSE
ALCAM	0.275913	0.883559	FALSE
ALDH16A1	0.336988	0.43336	FALSE
ALDH18A1	0.590649	0.376197	FALSE
ALDH1A1	-0.00374573	0.718428	FALSE
ALDH1A2	-0.11503	0.485594	FALSE
ALDH1A3	0.037513	0.71465	FALSE
ALDH1B1	0.325407	0.700226	FALSE
ALDH1L1	0.196044	0.262805	FALSE
ALDH1L2	-0.0981718	0.754675	FALSE
ALDH3A1	0.11733	0.662969	FALSE
ALDH3A2	0.433987	0.851807	FALSE
ALDH4A1	0.418062	0.686917	FALSE
ALDH5A1	0.528766	0.476061	FALSE
ALDH6A1	0.477989	0.667954	FALSE
ALDH7A1	0.431227	0.500565	FALSE
ALDH9A1	0.401376	0.615808	FALSE
ALDOB	-0.161593	0.0836206	FALSE
ALDOC	0.56114	0.152169	FALSE
ALG10	0.616558	0.334982	FALSE
ALG12	0.696038	0.183988	FALSE
ALG2	0.749599	0.502642	FALSE
ALG3	0.565946	0.336141	FALSE
ALG5	0.504205	0.42982	FALSE
ALG6	0.437879	0.33986	FALSE
ALG9	0.284802	0.428243	FALSE
ALKBH2	0.339425	0.219978	FALSE
ALKBH4	0.44985	0.297301	FALSE
ALKBH5	0.300686	0.308982	FALSE
ALKBH7	0.27654	-0.0728196	FALSE
ALOX12	0.0910561	-0.257115	FALSE
ALOX15	0.283977	0.49606	FALSE
ALOX15B	0.161774	0.333695	FALSE
ALOX5	0.127028	0.738324	FALSE
ALOX5AP	-0.0704577	0.390208	FALSE
ALPK1	0.40194	0.156469	FALSE
ALPK2	0.0919481	-0.0901233	FALSE
ALPL	0.106373	0.873238	FALSE
ALS2	0.332227	0.362441	FALSE
ALYREF	0.659806	0.486156	TRUE
AMBP	0.0319581	-0.0301933	FALSE
AMBRA1	0.490826	-0.0546864	FALSE
AMDHD2	0.210377	0.33723	FALSE
AMFR	0.569911	0.330904	TRUE
AMMECR1L	0.536465	0.133798	FALSE
AMN1	0.444147	0.468845	FALSE
AMOTL1	0.172247	0.265903	TRUE
AMOTL2	0.326511	0.157403	TRUE
AMPD1	0.139866	0.330724	FALSE
AMPD2	0.378693	0.416576	FALSE
AMPD3	-0.00406251	0.259955	FALSE
AMPH	-0.124969	0.322696	FALSE
AMZ2	0.57028	0.414172	FALSE
ANAPC1	0.36545	0.0255194	TRUE
ANAPC10	0.135869	-0.173181	TRUE
ANAPC13	0.331885	-0.0363595	FALSE
ANAPC16	0.449908	0.00741874	FALSE
ANAPC2	0.63426	0.337534	TRUE
ANAPC4	0.587776	0.118135	TRUE
ANAPC5	0.706271	0.279449	TRUE
ANAPC7	0.782097	0.274142	TRUE
ANGEL2	0.547787	0.500452	FALSE
ANGPT2	-0.115287	0.434045	FALSE
ANGPTL1	0.113411	-0.00653091	FALSE
ANGPTL2	0.201054	0.51206	FALSE
ANGPTL4	0.0427483	0.213407	TRUE
ANK1	0.238876	-0.248929	FALSE
ANK2	0.272412	0.367751	FALSE
ANK3	0.25669	0.591689	TRUE
ANKFY1	0.534481	0.420305	FALSE
ANKH	0.170075	0.425018	FALSE
ANKIB1	0.634909	0.305804	FALSE
ANKLE2	0.562481	0.519286	FALSE
ANKMY2	0.718229	0.793451	FALSE
ANKRD1	0.287865	-0.151981	FALSE
ANKRD10	0.55869	0.444798	FALSE
ANKRD11	0.457692	0.068802	TRUE
ANKRD13A	0.286563	0.609801	FALSE
ANKRD13D	0.260098	0.0838955	FALSE
ANKRD16	-0.1133	-0.0349622	FALSE
ANKRD17	0.0707015	0.0190605	FALSE
ANKRD2	0.130441	0.366637	FALSE
ANKRD22	-0.202793	0.444791	FALSE
ANKRD27	0.751087	0.409937	FALSE
ANKRD28	0.57361	0.462173	TRUE
ANKRD35	-0.155805	-0.355267	FALSE
ANKRD36	0.256129	0.231166	FALSE
ANKRD44	0.159709	0.583537	FALSE
ANKRD46	0.640626	0.0836031	FALSE
ANKRD49	0.612973	0.227417	FALSE
ANKRD50	0.478663	0.470622	FALSE
ANKRD52	0.00569006	0.176884	FALSE
ANKRD6	0.308526	0.371027	FALSE
ANKS1A	0.432804	0.340786	FALSE
ANKS1B	0.149352	0.242599	FALSE
ANKS3	0.514925	0.185965	FALSE
ANKS6	0.458197	0.792857	TRUE
ANKZF1	0.479573	0.39799	FALSE
ANLN	0.264902	0.793767	FALSE
ANO1	-0.0350771	0.623736	FALSE
ANO10	0.282104	0.500635	FALSE
ANO6	0.216862	0.390199	FALSE
ANO8	0.116911	0.215704	FALSE
ANP32A	0.526014	0.501253	TRUE
ANP32B	0.587679	0.486351	TRUE
ANP32E	0.136049	0.53854	FALSE
ANPEP	-0.0734098	0.695416	FALSE
ANTXR1	0.0495187	0.755533	FALSE
ANTXR2	0.200904	0.688211	FALSE
ANXA1	0.207245	0.842977	FALSE
ANXA11	0.427226	0.601829	FALSE
ANXA13	0.103127	-0.0111791	FALSE
ANXA2	0.369578	0.697222	TRUE
ANXA3	0.300944	0.637322	FALSE
ANXA4	0.340504	0.711201	FALSE
ANXA5	0.601053	0.682791	FALSE
ANXA6	-0.00135146	0.505384	TRUE
ANXA7	0.477834	0.564585	TRUE
ANXA8	0.0677952	0.554539	FALSE
ANXA9	-0.0570792	0.510585	FALSE
AOC1	-0.0667994	0.453957	FALSE
AOC3	0.245896	0.676212	FALSE
AOX1	0.202312	0.714476	FALSE
AP1AR	0.674965	0.168831	TRUE
AP1G1	0.639597	0.447855	TRUE
AP1G2	0.335898	0.253641	TRUE
AP1M1	0.425584	0.373171	TRUE
AP1S1	0.434494	0.134553	TRUE
AP2A1	0.50679	0.404494	TRUE
AP2A2	0.317758	0.576129	FALSE
AP2B1	0.434892	0.267209	FALSE
AP2S1	0.598151	0.130759	FALSE
AP3B1	0.698013	0.40953	TRUE
AP3B2	0.302151	0.0530548	TRUE
AP3D1	0.393247	0.132678	TRUE
AP3M1	0.730557	-0.0248419	TRUE
AP3M2	0.630852	0.141463	TRUE
AP3S1	0.321573	0.330947	TRUE
AP4B1	0.121127	-0.0813475	TRUE
AP4E1	0.452032	0.544385	TRUE
AP4M1	-0.249938	-0.0707484	TRUE
AP4S1	0.499051	0.396102	TRUE
AP5B1	0.109981	0.129175	TRUE
AP5M1	0.518049	0.0531437	TRUE
AP5Z1	0.682834	0.242096	TRUE
APAF1	0.421362	0.460005	TRUE
APBA1	0.246124	-0.300699	TRUE
APBA3	0.552578	0.307208	FALSE
APBB1	0.355218	0.519628	TRUE
APBB1IP	-0.120645	0.630917	TRUE
APBB2	0.242202	0.50463	FALSE
APC	0.564031	0.0307901	TRUE
APCS	-0.144745	0.0778765	FALSE
APEH	0.620365	0.65834	FALSE
APEX1	0.575416	0.577033	TRUE
APH1A	0.349598	0.241184	TRUE
API5	0.493557	0.23029	TRUE
APIP	0.335571	0.290537	FALSE
APLF	0.249116	0.176327	FALSE
APLP2	0.580654	0.651265	FALSE
APMAP	0.35775	0.376678	FALSE
APOA1	0.0844576	-0.1535	TRUE
APOA2	0.157308	0.0348232	FALSE
APOA4	0.00716942	-0.0907288	FALSE
APOBR	-0.120184	0.570812	FALSE
APOC3	0.242176	-0.0208886	FALSE
APOD	-0.00752037	0.430872	FALSE
APOE	-0.150952	0.205497	FALSE
APOF	-0.0516162	0.0927303	FALSE
APOH	0.083048	-0.211048	FALSE
APOL1	0.358449	0.18266	TRUE
APOL2	0.521251	0.612331	FALSE
APP	0.454387	0.612918	TRUE
APPL1	0.583588	0.509598	TRUE
APPL2	0.436331	0.511743	FALSE
APRT	0.514706	0.639852	FALSE
APTX	0.487813	0.34799	FALSE
AQR	0.586701	0.028614	TRUE
ARAP1	0.143466	0.549267	FALSE
ARAP2	0.484324	0.558752	FALSE
ARAP3	0.1776	0.345325	FALSE
ARCN1	0.635277	0.513302	FALSE
ARF1	0.476206	0.277708	TRUE
ARF4	0.228229	0.530279	FALSE
ARF5	0.463712	0.27259	FALSE
ARF6	0.592223	0.492818	FALSE
ARFGAP1	0.684254	0.462692	FALSE
ARFGEF1	0.774187	0.550836	FALSE
ARFGEF2	0.519777	0.368948	FALSE
ARFIP1	0.565263	0.601107	FALSE
ARFIP2	0.382897	0.366558	TRUE
ARFRP1	0.397495	0.156327	FALSE
ARG1	-0.0532946	0.168042	FALSE
ARGLU1	0.653034	0.31437	FALSE
ARHGAP1	0.247597	0.390718	FALSE
ARHGAP10	0.363186	0.544512	TRUE
ARHGAP12	0.405963	0.617698	FALSE
ARHGAP15	-0.0948788	0.71554	FALSE
ARHGAP17	0.342614	0.280081	TRUE
ARHGAP18	0.268626	0.590854	FALSE
ARHGAP21	0.24789	0.360492	FALSE
ARHGAP23	0.277887	0.373473	FALSE
ARHGAP25	0.0512465	0.659237	FALSE
ARHGAP26	0.470135	0.526445	FALSE
ARHGAP29	0.302172	0.468293	FALSE
ARHGAP30	-0.123685	0.632885	FALSE
ARHGAP31	0.238086	0.579915	FALSE
ARHGAP32	0.282475	0.234304	FALSE
ARHGAP35	0.499687	0.532001	FALSE
ARHGAP44	0.309926	0.00237881	FALSE
ARHGAP5	0.530455	0.451332	FALSE
ARHGAP9	0.00588462	0.407656	FALSE
ARHGDIA	0.293971	0.35061	FALSE
ARHGDIB	-0.0114445	0.635719	FALSE
ARHGEF1	0.258332	0.474819	TRUE
ARHGEF10	0.284867	0.427506	FALSE
ARHGEF11	0.289125	0.327439	FALSE
ARHGEF12	0.360124	0.357059	FALSE
ARHGEF16	0.480536	0.612579	FALSE
ARHGEF17	0.174663	0.359183	FALSE
ARHGEF18	0.67394	0.543948	TRUE
ARHGEF2	0.333945	0.616689	TRUE
ARHGEF28	0.531152	0.248803	FALSE
ARHGEF3	0.207479	0.230211	FALSE
ARHGEF37	0.351212	0.552236	FALSE
ARHGEF40	0.275849	0.400619	FALSE
ARHGEF5	0.366072	0.479305	FALSE
ARHGEF7	0.447333	0.412046	TRUE
ARID1A	0.386835	0.205939	TRUE
ARID1B	0.444527	0.292435	TRUE
ARID2	0.254341	0.162963	TRUE
ARID3A	0.436568	0.468367	FALSE
ARID4A	0.503491	0.339145	TRUE
ARID4B	0.491446	0.230601	TRUE
ARID5B	0.0793928	0.344564	FALSE
ARIH2	0.632024	0.0760957	FALSE
ARL1	0.305957	0.299255	TRUE
ARL14EP	0.620644	0.182494	FALSE
ARL15	0.141846	0.337252	FALSE
ARL2BP	0.643668	0.558875	FALSE
ARL3	0.27723	0.304404	FALSE
ARL4C	0.422884	0.678797	FALSE
ARL5A	0.223898	-0.0440383	FALSE
ARL5B	0.475759	0.142632	FALSE
ARL6	0.446625	0.419964	FALSE
ARL6IP5	0.226932	0.310388	FALSE
ARL6IP6	0.0368603	-0.111867	FALSE
ARL8A	0.603602	0.0888889	FALSE
ARL8B	0.413672	0.219988	FALSE
ARMC1	0.712235	0.430375	FALSE
ARMC10	0.507624	0.511698	FALSE
ARMC4	0.00488876	-0.166935	FALSE
ARMC5	0.114152	0.319088	FALSE
ARMC6	0.193257	0.202221	FALSE
ARMC7	-0.389217	-0.0118014	FALSE
ARMC8	0.567801	0.399706	TRUE
ARPC2	0.558337	0.15382	TRUE
ARPC3	0.411636	-0.0946047	TRUE
ARPC5	0.404356	0.354833	TRUE
ARPC5L	0.661812	0.34379	FALSE
ARPP19	0.469767	0.295928	FALSE
ARRB1	0.34478	0.597019	TRUE
ARRB2	0.549529	0.505578	TRUE
ARRDC1	0.506268	0.347028	FALSE
ARSA	0.559072	0.569986	FALSE
ARSB	0.213062	0.310682	FALSE
ART4	-0.0218671	0.23608	FALSE
ARV1	0.393796	-0.0452431	FALSE
ARVCF	0.334428	0.637882	FALSE
ASAH1	0.665151	0.395822	TRUE
ASAP1	0.211497	0.439386	TRUE
ASAP2	0.521821	0.647892	FALSE
ASAP3	0.351071	0.452249	FALSE
ASCC1	0.394816	-0.052237	TRUE
ASCC2	0.666005	0.159643	TRUE
ASCC3	0.509633	0.652168	TRUE
ASF1A	0.534964	0.401468	TRUE
ASF1B	0.421895	0.540673	TRUE
ASH2L	0.771494	0.495235	TRUE
ASNA1	0.425058	0.458361	FALSE
ASPA	0.10667	0.633736	FALSE
ASPH	0.582967	0.326513	FALSE
ASPM	0.0913229	0.266325	FALSE
ASPN	0.0903228	0.633664	FALSE
ASPSCR1	0.567643	0.462331	FALSE
ASRGL1	0.479259	0.839311	FALSE
ASS1	0.403938	0.74117	FALSE
ASTE1	0.176949	0.106966	FALSE
ATAD1	0.693144	0.503252	FALSE
ATAD2	0.570535	0.582015	FALSE
ATAD2B	0.379735	0.0321138	FALSE
ATE1	0.641683	0.455818	FALSE
ATF1	0.470209	0.274595	FALSE
ATF6	0.368149	0.146107	FALSE
ATF7IP	0.209398	0.160298	TRUE
ATG12	0.641017	0.0155827	FALSE
ATG13	0.468108	0.0407838	TRUE
ATG16L1	0.653739	0.515721	TRUE
ATG2A	0.00963695	0.099619	FALSE
ATG3	0.543039	0.375589	FALSE
ATG4B	0.54577	0.444603	FALSE
ATG4C	0.291597	0.194681	FALSE
ATG5	0.627653	0.244061	FALSE
ATG7	0.449586	0.466275	FALSE
ATG9A	0.292509	0.154082	FALSE
ATIC	0.335849	0.548204	FALSE
ATL1	0.152659	0.580757	TRUE
ATL2	0.477223	0.444921	TRUE
ATL3	0.247283	0.687827	TRUE
ATN1	0.0806188	-0.140088	FALSE
ATOX1	0.198525	0.566612	FALSE
ATP11A	0.302672	0.489905	FALSE
ATP11B	0.422983	-0.0172087	FALSE
ATP12A	0.0500681	0.169	FALSE
ATP13A1	0.459626	0.126423	FALSE
ATP13A2	0.437127	0.354386	FALSE
ATP13A3	0.651077	0.310659	FALSE
ATP1A1	0.282562	0.284846	FALSE
ATP1A2	0.0180178	-0.177236	FALSE
ATP1A3	0.186375	0.0654545	FALSE
ATP1B1	0.0737949	0.589129	TRUE
ATP1B3	0.338733	0.397222	FALSE
ATP2A1	0.0735972	-0.0323751	TRUE
ATP2A2	0.245862	0.250068	TRUE
ATP2A3	0.270157	0.196974	FALSE
ATP2B1	0.431805	0.372471	FALSE
ATP2B2	0.190952	0.257752	FALSE
ATP2B4	0.189693	0.104655	FALSE
ATP2C1	0.315622	0.267729	FALSE
ATP5A1	0.540171	0.450849	TRUE
ATP5B	0.45447	0.245429	TRUE
ATP5C1	0.364596	0.155104	TRUE
ATP5D	0.321389	0.196341	TRUE
ATP5H	0.672688	0.390041	TRUE
ATP5J	0.521237	0.350271	TRUE
ATP5O	0.593795	0.36757	TRUE
ATP5S	0.189111	0.0708147	FALSE
ATP6V0A2	0.328856	0.199937	FALSE
ATP6V0A4	0.336869	0.136496	FALSE
ATP6V0D1	0.656924	0.375655	TRUE
ATP6V1A	0.454026	0.344309	TRUE
ATP6V1B2	0.560957	0.713437	TRUE
ATP6V1C1	0.723035	0.631481	FALSE
ATP6V1D	0.442235	0.138234	FALSE
ATP6V1E1	0.262916	0.23906	FALSE
ATP6V1E2	0.0471434	-0.0215548	FALSE
ATP6V1F	0.0874083	0.16226	FALSE
ATP6V1G1	0.561441	0.168	FALSE
ATP6V1H	0.675851	0.279923	FALSE
ATP7B	0.0255164	-0.0568484	FALSE
ATP8A1	0.472262	0.367046	FALSE
ATP8B2	0.190124	0.127273	FALSE
ATP9A	0.420114	0.529855	FALSE
ATP9B	0.65357	0.0864273	FALSE
ATPAF2	0.614196	0.0711608	FALSE
ATPIF1	0.45709	0.66678	TRUE
ATR	0.397859	0.272561	TRUE
ATRAID	0.416871	0.188086	FALSE
ATRN	0.634196	0.280985	FALSE
ATXN1	0.389873	0.437398	TRUE
ATXN10	0.433591	0.43322	FALSE
ATXN1L	0.543053	0.307624	FALSE
ATXN2	0.230304	0.0476739	FALSE
ATXN2L	0.12012	-0.0196251	FALSE
ATXN3	0.624182	0.472787	FALSE
ATXN7L3B	0.5035	0.377538	FALSE
AUH	0.504652	0.557736	FALSE
AUP1	0.528038	0.397471	TRUE
AURKA	0.283297	0.621142	TRUE
AURKB	0.170273	0.705668	TRUE
AUTS2	0.329427	0.218841	FALSE
AVEN	0.613195	0.221612	FALSE
AVL9	0.570252	0.386947	FALSE
AXIN1	0.66147	0.331966	TRUE
AXL	0.145865	0.376068	FALSE
AZI2	0.256898	0.36	TRUE
AZU1	0.197427	0.106918	FALSE
B2M	0.308967	0.686382	FALSE
B3GALNT1	0.474586	0.566531	FALSE
B3GALT6	0.668493	0.405955	FALSE
B3GAT3	0.335075	0.358921	FALSE
B3GNT3	0.174682	0.483202	FALSE
B3GNT9	0.317881	0.237736	FALSE
B4GALT3	0.547482	0.0174957	FALSE
B4GALT4	0.38704	0.317728	FALSE
B4GALT5	0.407745	0.279652	FALSE
B4GALT7	0.6101	0.160117	FALSE
B9D1	-0.147177	0.232259	FALSE
BABAM1	0.411277	0.375099	FALSE
BAD	0.362817	0.21635	FALSE
BAG1	0.185567	0.245451	TRUE
BAG3	0.171546	0.442502	FALSE
BAG4	0.750669	0.477304	FALSE
BAG5	0.656761	0.515619	TRUE
BAIAP2	0.184781	0.519813	FALSE
BAIAP2L1	0.455639	0.498216	FALSE
BAK1	0.515932	0.49537	TRUE
BANF1	0.632361	0.280556	TRUE
BANP	0.577726	0.315453	TRUE
BAP1	0.662782	0.295448	FALSE
BASP1	-0.0581883	0.693383	FALSE
BAX	0.413521	0.476649	TRUE
BAZ1A	0.525423	0.611337	TRUE
BAZ1B	0.564485	0.320045	TRUE
BAZ2A	0.0167465	0.135818	TRUE
BAZ2B	0.350369	0.192764	FALSE
BBOX1	0.284381	0.706869	FALSE
BBS1	0.0557352	0.316602	TRUE
BBS7	0.388127	0.000965534	TRUE
BBS9	0.580926	0.134408	TRUE
BBX	-0.0155942	0.19117	FALSE
BCAM	0.355317	0.501028	FALSE
BCAR1	0.4506	0.340989	TRUE
BCAR3	0.36813	0.470228	FALSE
BCAS2	0.34256	0.238285	TRUE
BCAS3	0.39943	0.198353	FALSE
BCAS4	-0.0137232	0.298347	FALSE
BCAT1	0.0801304	0.822335	FALSE
BCAT2	0.596254	0.434221	FALSE
BCCIP	0.623164	0.577846	TRUE
BCHE	0.0540409	0.383537	FALSE
BCKDHA	0.430161	0.27022	FALSE
BCKDHB	0.639733	0.509688	FALSE
BCKDK	0.275366	0.211813	FALSE
BCL10	0.497874	0.393721	TRUE
BCL11A	0.189208	0.321555	FALSE
BCL2	0.181135	0.633673	TRUE
BCL2L1	0.466297	0.566847	TRUE
BCL2L11	0.349011	0.007972	FALSE
BCL2L12	0.17928	-0.269375	FALSE
BCL2L13	0.660208	0.425542	FALSE
BCL2L14	0.258798	0.103571	FALSE
BCL2L15	0.103236	0.381361	FALSE
BCL6	0.128188	-0.052935	TRUE
BCL7A	0.595679	0.44806	FALSE
BCL7B	0.658606	-0.148035	FALSE
BCL9L	0.17124	0.0599833	FALSE
BCLAF1	0.35846	0.456143	FALSE
BCS1L	0.534156	0.181029	FALSE
BDH1	0.462892	0.681391	FALSE
BECN1	0.567775	0.319851	TRUE
BEND3	0.211893	0.259927	FALSE
BEND7	0.557156	0.157143	FALSE
BET1	0.435188	0.41827	FALSE
BET1L	0.645039	0.439837	FALSE
BHLHE41	0.351939	0.621748	FALSE
BICC1	-0.13087	0.398819	FALSE
BICD1	0.475883	0.500678	FALSE
BICD2	0.480425	0.347833	TRUE
BID	0.229113	0.331391	FALSE
BIN1	0.477508	0.816847	TRUE
BIN2	0.0770702	0.64991	FALSE
BIN3	0.688677	0.355714	FALSE
BIRC2	0.279615	0.195237	TRUE
BIRC5	0.4905	0.567955	TRUE
BLK	0.218539	0.226171	FALSE
BLM	0.452469	0.236698	TRUE
BLMH	0.51048	0.751287	FALSE
BLNK	-0.134591	0.323278	TRUE
BLOC1S2	0.407949	0.268875	TRUE
BLOC1S3	0.643868	0.142186	TRUE
BLOC1S4	0.618045	0.138302	TRUE
BLOC1S6	0.507466	-0.0695003	TRUE
BLVRA	0.07806	0.618383	TRUE
BLVRB	0.358315	0.260401	FALSE
BLZF1	0.240388	0.154633	FALSE
BMP1	0.265728	0.532009	FALSE
BMP2K	0.396446	0.462737	FALSE
BMP7	0.360175	0.547619	FALSE
BMPR2	0.306263	0.310121	FALSE
BMS1	0.2792	0.110659	FALSE
BNC2	0.0947328	0.353248	FALSE
BNIP1	0.459251	0.313844	FALSE
BNIP2	0.516774	0.317252	FALSE
BNIP3L	0.703533	0.393213	FALSE
BNIPL	0.164301	0.714286	FALSE
BOD1	0.504334	0.300903	TRUE
BOD1L1	0.525058	0.193519	TRUE
BOK	0.377833	0.358131	FALSE
BOLA1	0.385917	0.081346	FALSE
BOLA3	0.22994	0.428297	FALSE
BPGM	0.424794	0.153004	FALSE
BPHL	0.610273	0.749119	FALSE
BPI	-0.0342573	0.0536478	FALSE
BPNT1	0.366659	0.575713	FALSE
BPTF	0.313351	0.034327	TRUE
BRAF	0.374491	0.134052	TRUE
BRAP	0.749823	0.407498	FALSE
BRAT1	0.656762	0.245212	FALSE
BRD3	0.611839	0.450429	FALSE
BRD4	0.20426	0.217615	TRUE
BRD7	0.689706	0.010953	TRUE
BRD8	0.547657	0.0464995	TRUE
BRD9	0.358441	0.0990082	FALSE
BRF1	0.0955458	0.12271	TRUE
BRF2	0.717716	0.489554	FALSE
BRI3	0.192121	0.131483	FALSE
BRI3BP	0.48008	0.665221	FALSE
BRIX1	0.599862	0.399955	TRUE
BRK1	0.305324	0.161763	TRUE
BRMS1	0.407997	0.0127672	TRUE
BRMS1L	0.694879	0.276716	TRUE
BROX	0.569346	0.567447	FALSE
BRPF1	0.510838	0.191322	TRUE
BRPF3	0.325992	-0.0981191	TRUE
BRWD1	0.458548	0.0561906	FALSE
BSG	0.368236	-0.199553	TRUE
BSPRY	0.605969	0.731429	FALSE
BTAF1	0.335201	0.2035	FALSE
BTBD1	0.553776	0.122461	FALSE
BTBD2	0.54931	0.22177	FALSE
BTBD9	0.478195	0.111579	FALSE
BTD	0.267007	0.157676	FALSE
BTF3	0.578919	0.582949	FALSE
BTF3L4	0.348605	0.306436	FALSE
BTRC	0.575785	-0.0539521	TRUE
BUB3	0.401732	0.074729	TRUE
BUD13	0.524354	0.329022	TRUE
BUD31	0.288798	0.270198	TRUE
BYSL	0.727292	0.522033	FALSE
BZW1	0.498144	0.53051	TRUE
BZW2	0.287411	0.613288	FALSE
C10orf35	0.293905	0.294848	FALSE
C10orf76	0.49655	0.27631	FALSE
C11orf54	0.510687	0.499963	FALSE
C11orf57	0.385394	0.200717	FALSE
C11orf58	0.513627	0.497674	FALSE
C11orf68	0.308299	0.505939	FALSE
C11orf84	0.291369	0.0864085	FALSE
C11orf96	-0.178408	0.602755	FALSE
C12orf29	0.512645	0.281394	FALSE
C12orf4	0.52771	0.0478771	FALSE
C12orf43	0.769249	0.324369	FALSE
C12orf45	0.62327	0.450925	FALSE
C12orf57	0.294201	0.400761	FALSE
C12orf75	0.325615	0.323363	FALSE
C14orf119	0.279125	0.0813853	FALSE
C14orf159	0.312802	0.219219	FALSE
C14orf166	0.415082	0.168155	FALSE
C14orf2	0.497724	0.219241	FALSE
C15orf40	0.306268	0.155831	FALSE
C15orf41	0.435653	0.449918	FALSE
C15orf52	0.503418	0.772522	FALSE
C16orf58	0.719721	0.352033	FALSE
C16orf62	0.413317	0.443708	TRUE
C16orf70	0.790163	0.234596	FALSE
C16orf91	0.626015	0.341373	FALSE
C17orf58	0.655135	-0.377323	FALSE
C17orf62	0.426346	0.27308	FALSE
C17orf75	0.425906	0.4278	FALSE
C17orf97	0.369367	0.464675	FALSE
C18orf21	0.604474	0.322417	FALSE
C18orf8	0.634504	0.404901	FALSE
C19orf12	0.624908	0.588776	FALSE
C19orf25	0.480414	0.254562	FALSE
C19orf47	0.000211962	0.20217	FALSE
C19orf54	0.0663874	0.359146	FALSE
C19orf66	0.458976	0.60393	FALSE
C19orf70	0.167582	0.308785	FALSE
C1D	0.44548	-0.0829499	FALSE
C1orf109	0.629451	0.546798	FALSE
C1orf116	0.0589198	0.665158	FALSE
C1orf122	0.381274	0.225158	FALSE
C1orf123	0.200662	0.446679	FALSE
C1orf131	0.567036	0.157184	FALSE
C1orf174	0.801788	0.34939	FALSE
C1orf198	0.30955	0.365918	FALSE
C1orf21	0.271103	0.324338	FALSE
C1orf27	0.440782	0.274674	FALSE
C1orf35	0.503351	0.481323	FALSE
C1orf50	0.364562	0.398238	FALSE
C1orf52	0.393742	0.0573635	FALSE
C1orf87	0.290818	0.325093	FALSE
C1QB	0.0714962	0.317143	TRUE
C1QBP	0.466628	0.524742	TRUE
C1QTNF5	0.0460506	0.295186	FALSE
C1RL	0.328821	0.213911	FALSE
C1S	-0.1422	0.540641	FALSE
C20orf27	0.495794	0.501152	FALSE
C21orf2	0.123681	0.0964099	FALSE
C2CD2	0.447766	0.563144	FALSE
C2CD2L	0.428592	0.439228	FALSE
C2CD5	0.65819	0.696341	FALSE
C2orf49	0.567012	0.311563	FALSE
C2orf54	0.454192	0.546895	FALSE
C2orf69	0.42589	0.467813	FALSE
C2orf76	0.381857	0.112493	FALSE
C2orf88	0.225856	0.673796	FALSE
C3AR1	-0.158277	0.122353	FALSE
C3orf58	0.468452	0.518406	FALSE
C4BPA	0.191676	-0.0962706	FALSE
C4BPB	0.137759	-0.0138197	FALSE
C4orf3	0.468677	0.18137	FALSE
C4orf33	0.425049	0.356781	FALSE
C5	0.381472	0.0344306	FALSE
C5orf15	0.238931	0.420265	FALSE
C5orf22	0.694632	0.254607	FALSE
C5orf51	0.363936	0.380948	FALSE
C6	-0.00176392	0.305697	FALSE
C6orf106	0.545057	0.268442	FALSE
C6orf132	0.475815	0.572764	FALSE
C6orf203	0.488421	0.322674	FALSE
C6orf89	0.694509	0.298064	FALSE
C7	-0.0783499	0.717028	FALSE
C7orf25	0.359432	0.227895	FALSE
C7orf26	0.522722	0.293055	FALSE
C8A	0.264119	-0.151983	FALSE
C8G	0.165257	0.108451	FALSE
C8orf33	0.586692	0.519264	FALSE
C8orf37	0.358016	0.494331	FALSE
C9	0.0293094	0.0506112	FALSE
C9orf64	0.591494	0.518962	FALSE
C9orf72	0.434112	0.406118	TRUE
C9orf78	0.729255	0.605465	FALSE
CA1	-0.0463075	0.238219	FALSE
CA12	0.277977	0.791847	FALSE
CA2	0.345036	0.284192	FALSE
CA4	0.0456885	0.254057	FALSE
CA8	0.262174	0.8257	FALSE
CA9	0.372094	0.701688	FALSE
CAAP1	0.603603	0.28058	FALSE
CAB39	0.627068	0.573058	TRUE
CAB39L	0.513644	0.334079	FALSE
CABIN1	0.518589	0.120205	TRUE
CABLES1	0.388161	0.663866	FALSE
CACHD1	0.265892	0.307127	FALSE
CACNA1S	0.124617	-0.408248	FALSE
CACNA2D1	0.0402666	0.657836	FALSE
CACNA2D2	0.00271762	0.285315	FALSE
CACNB1	0.353462	0.58566	FALSE
CACNB3	0.395942	0.542342	FALSE
CACTIN	0.537471	0.2493	TRUE
CACUL1	0.337214	0.240334	FALSE
CACYBP	0.269722	0.538189	TRUE
CAD	0.237813	0.0536275	FALSE
CADM1	0.298007	0.696545	TRUE
CADM3	-0.0312432	0.0767062	FALSE
CADPS	0.00668573	0.619249	FALSE
CALB1	0.328007	0.249787	FALSE
CALB2	0.265722	0.831007	FALSE
CALCOCO1	0.183373	0.252258	FALSE
CALCOCO2	0.738237	0.33514	FALSE
CALD1	0.128446	0.735857	FALSE
CALHM2	0.1631	0.44189	FALSE
CALM2	0.312637	0.0737144	FALSE
CALML5	-0.0526404	0.340441	FALSE
CALR	0.458171	0.557004	TRUE
CALU	0.328978	0.459093	FALSE
CAMK1	-0.012802	0.353366	FALSE
CAMK2A	0.0901347	0.148723	TRUE
CAMK2B	0.175184	0.0701648	FALSE
CAMK2D	0.415803	0.830556	TRUE
CAMK2G	0.521908	0.407197	FALSE
CAMK4	0.163343	0.451896	FALSE
CAMKK1	0.4619	0.224959	FALSE
CAMKK2	0.640476	0.44257	FALSE
CAMKMT	0.20787	0.212292	FALSE
CAMLG	0.369047	0.0222473	TRUE
CAMP	-0.0455746	-0.0927894	FALSE
CAMSAP1	0.533183	0.318254	FALSE
CAMSAP2	0.370517	0.157385	FALSE
CAMSAP3	0.594329	0.459906	FALSE
CAND1	0.663222	0.655262	TRUE
CAND2	0.123899	-0.0412726	FALSE
CANT1	0.786705	0.523577	FALSE
CANX	0.315434	0.369235	TRUE
CAP2	0.574897	0.469083	FALSE
CAPG	0.368999	0.805217	TRUE
CAPN1	0.472096	0.518593	TRUE
CAPN13	0.146345	0.659893	FALSE
CAPN15	0.284621	0.207003	FALSE
CAPN2	-0.0344717	0.665425	FALSE
CAPNS1	0.719267	0.272915	TRUE
CAPNS2	0.257555	0.0423378	FALSE
CAPRIN1	0.648243	0.386495	TRUE
CAPZA1	0.452848	0.197267	TRUE
CAPZA2	0.417974	0.130917	FALSE
CAPZB	0.3965	0.358947	TRUE
CARD11	0.0705975	0.593643	TRUE
CARD6	0.0300427	0.097323	FALSE
CARD8	0.527893	0.264612	TRUE
CARD9	0.199535	0.529407	FALSE
CARHSP1	0.518152	0.516102	FALSE
CARM1	0.518443	0.468303	TRUE
CARS	0.533712	0.58504	FALSE
CARS2	0.626424	0.615583	FALSE
CASC3	0.139629	0.0102693	TRUE
CASC4	0.576185	0.603376	FALSE
CASKIN2	0.132321	0.251921	FALSE
CASP1	0.236504	0.466795	TRUE
CASP10	0.389558	0.662041	TRUE
CASP14	0.0889183	-0.128808	FALSE
CASP3	0.477724	0.629313	FALSE
CASP4	0.320469	0.348326	FALSE
CASP5	0.0518091	0.121783	TRUE
CASP7	0.244954	0.648546	FALSE
CASP8	0.542261	0.511145	TRUE
CASP9	0.592655	0.46825	TRUE
CASQ1	0.192856	-0.164498	FALSE
CASQ2	0.127364	0.465894	FALSE
CAST	0.489116	0.66145	FALSE
CASZ1	0.464554	0.340533	FALSE
CAT	0.344659	0.23322	FALSE
CAV1	-0.00906688	0.358446	TRUE
CAV2	0.213167	0.0465899	FALSE
CAV3	0.0294194	0.247883	TRUE
CBFA2T2	0.381792	0.326898	FALSE
CBFB	0.639344	0.476061	TRUE
CBL	0.237461	0.224277	TRUE
CBLB	0.239274	0.282069	TRUE
CBLL1	0.579466	-0.101287	FALSE
CBLN1	0.332978	0.607143	FALSE
CBR1	0.605815	0.542818	FALSE
CBR3	0.152468	0.526466	FALSE
CBR4	0.581603	0.534267	FALSE
CBS	0.417627	0.778681	FALSE
CBWD1	0.458652	0.487308	FALSE
CBWD2	0.27098	0.3236	FALSE
CBX1	0.616278	0.359643	FALSE
CBX2	0.21909	0.465973	TRUE
CBX3	0.504377	0.136837	TRUE
CBX4	0.137842	0.325632	TRUE
CBX6	0.337707	0.122984	FALSE
CBX7	0.472679	0.625494	FALSE
CBX8	0.23022	0.382077	TRUE
CC2D1A	0.367869	0.430397	FALSE
CC2D1B	0.540109	0.270596	FALSE
CCDC102A	0.502368	0.574345	FALSE
CCDC106	0.25333	-0.0849691	FALSE
CCDC115	0.529913	0.0137986	FALSE
CCDC117	0.53076	0.587018	FALSE
CCDC12	0.456757	0.475203	FALSE
CCDC124	0.457137	0.274464	FALSE
CCDC126	0.509436	0.342206	FALSE
CCDC127	0.68388	0.581391	FALSE
CCDC130	0.51488	0.5103	FALSE
CCDC134	0.551512	0.544467	FALSE
CCDC137	0.717083	0.35402	FALSE
CCDC14	0.351911	0.264935	FALSE
CCDC149	0.534277	0.180455	FALSE
CCDC158	0.0593828	0.353766	FALSE
CCDC170	0.0913446	0.32712	FALSE
CCDC174	0.420616	0.173932	FALSE
CCDC25	0.648776	0.544874	FALSE
CCDC28A	0.561904	0.487364	FALSE
CCDC43	0.590676	0.223103	FALSE
CCDC47	0.739324	0.623464	FALSE
CCDC50	0.739549	0.498238	FALSE
CCDC51	0.406553	0.400574	FALSE
CCDC57	0.285136	-0.114625	FALSE
CCDC58	0.395596	0.180281	FALSE
CCDC59	0.601193	0.198031	FALSE
CCDC6	0.334336	0.5098	FALSE
CCDC61	0.667573	0.221727	FALSE
CCDC69	0.113801	0.264663	FALSE
CCDC71	0.578437	-0.094606	FALSE
CCDC71L	0.360672	0.114818	FALSE
CCDC77	0.0468714	0.376163	FALSE
CCDC8	0.310034	0.665135	TRUE
CCDC82	0.646885	0.138598	FALSE
CCDC85C	0.425516	0.557147	FALSE
CCDC86	0.483922	0.0540425	FALSE
CCDC88A	0.106105	0.261012	FALSE
CCDC88B	-0.112582	0.0733288	FALSE
CCDC88C	0.272034	0.190447	FALSE
CCDC9	0.316488	0.347347	FALSE
CCDC90B	0.390041	0.312331	FALSE
CCDC91	0.660314	0.684734	FALSE
CCDC92	0.459221	0.388177	TRUE
CCDC93	0.312724	0.236495	TRUE
CCDC94	0.684132	0.32037	FALSE
CCDC96	0.439613	0.2	FALSE
CCDC97	0.448566	0.0298669	FALSE
CCL20	0.127114	0.678571	FALSE
CCL21	0.0292862	0.524027	FALSE
CCL5	-0.0425029	0.174783	FALSE
CCM2	0.452351	0.322538	FALSE
CCNB1	0.395157	0.68201	TRUE
CCNB2	0.180967	0.508376	TRUE
CCND2	0.205414	0.828571	TRUE
CCNDBP1	0.399972	0.083426	FALSE
CCNE1	0.693042	0.426165	TRUE
CCNH	0.51274	0.274232	TRUE
CCNK	0.337431	0.0582656	TRUE
CCNL1	0.572849	0.198381	FALSE
CCNL2	0.360559	-0.0296223	FALSE
CCNT1	0.411355	0.284372	TRUE
CCNT2	0.635779	0.170912	TRUE
CCNY	0.259385	0.290652	FALSE
CCS	0.322226	0.488686	FALSE
CCT2	0.718337	0.316757	TRUE
CCT3	0.460547	0.377791	TRUE
CCT4	0.436233	0.327507	TRUE
CCT5	0.694111	0.187263	TRUE
CCT6A	0.486728	0.216446	TRUE
CCT6B	0.237596	-0.0869831	FALSE
CCT7	0.356506	0.00283425	TRUE
CCT8	0.677621	0.389995	TRUE
CCZ1	0.479311	0.316283	FALSE
CD109	0.33388	0.695303	FALSE
CD14	-0.0260245	0.614976	FALSE
CD151	0.347839	0.40539	TRUE
CD163	-0.117303	0.45179	FALSE
CD164	0.724573	0.244636	FALSE
CD180	0.0192213	0.360072	FALSE
CD19	0.247601	0.7	TRUE
CD200	-0.0217125	0.746635	FALSE
CD209	-0.0598496	0.511902	FALSE
CD247	-0.201129	0.691729	FALSE
CD248	0.0628162	0.81346	FALSE
CD276	0.360599	0.700548	FALSE
CD2AP	0.661071	0.64135	TRUE
CD2BP2	0.573089	0.323013	TRUE
CD300A	-0.0816552	0.639092	FALSE
CD300LG	0.0366536	0.453046	FALSE
CD34	-0.109722	0.520912	FALSE
CD36	-0.112506	0.759688	FALSE
CD37	-0.0790136	0.390654	FALSE
CD38	0.143252	0.714977	FALSE
CD3E	-0.243336	0.533869	FALSE
CD3EAP	0.59808	0.485985	TRUE
CD4	-0.0417436	0.511679	FALSE
CD40	-0.0392603	0.778049	FALSE
CD44	0.105699	0.651174	TRUE
CD46	0.428123	0.500136	FALSE
CD47	0.262379	0.559477	TRUE
CD48	-0.128722	0.757927	FALSE
CD5	0.0793118	0.533026	FALSE
CD53	0.0674486	0.679359	TRUE
CD55	0.139432	0.653568	FALSE
CD58	0.0324943	0.436577	FALSE
CD5L	-0.0677247	0.256166	FALSE
CD63	0.312404	0.325971	TRUE
CD68	-0.0115315	0.384984	FALSE
CD72	0.0770484	0.60989	FALSE
CD74	0.476375	0.568373	FALSE
CD82	0.351844	0.797448	FALSE
CD84	-0.108655	0.185398	FALSE
CD8A	0.0405492	0.865117	TRUE
CD9	0.517309	0.646447	TRUE
CD93	-0.0297803	0.612376	FALSE
CDA	0.13943	0.234553	FALSE
CDAN1	0.534534	0.436802	TRUE
CDC123	0.622088	0.429201	FALSE
CDC14A	0.253855	-0.0830281	FALSE
CDC16	0.644109	0.301767	TRUE
CDC20	0.64384	0.260248	TRUE
CDC23	0.541341	0.330377	TRUE
CDC25C	0.234401	0.510574	FALSE
CDC26	0.406907	0.0560894	FALSE
CDC27	0.626449	0.473148	TRUE
CDC34	0.486175	0.349426	TRUE
CDC40	0.814481	0.575203	TRUE
CDC42	0.444048	0.25953	TRUE
CDC42BPA	0.219517	0.494955	FALSE
CDC42BPB	0.281451	0.371116	FALSE
CDC42BPG	0.173331	0.332204	FALSE
CDC42EP1	0.483033	0.577484	FALSE
CDC42EP3	0.476361	0.446725	FALSE
CDC42EP5	-0.0542451	0.441692	FALSE
CDC5L	0.661093	0.355962	TRUE
CDC73	0.332307	0.194377	TRUE
CDCA3	0.239168	0.549269	FALSE
CDCA5	0.283789	0.40856	TRUE
CDCA7L	0.284182	0.449421	FALSE
CDCA8	0.597558	0.48041	TRUE
CDCP1	0.18662	0.597064	TRUE
CDH1	0.291449	0.165956	TRUE
CDH10	-0.00230157	-0.0272178	FALSE
CDH11	0.266683	0.844061	FALSE
CDH13	-0.181036	0.518609	FALSE
CDH2	0.292717	0.850271	TRUE
CDH3	0.185862	0.281774	FALSE
CDH5	0.243592	0.511902	TRUE
CDH6	0.123432	0.775971	FALSE
CDIPT	0.70822	0.42561	FALSE
CDK1	0.370868	0.740041	TRUE
CDK12	0.410116	0.0790199	TRUE
CDK13	0.587382	0.111089	FALSE
CDK14	0.22837	0.130891	FALSE
CDK17	0.486607	0.168044	FALSE
CDK18	0.118182	-0.049187	FALSE
CDK19	0.685065	0.199412	TRUE
CDK2	0.517319	0.529423	TRUE
CDK2AP1	0.376227	0.0684282	FALSE
CDK2AP2	0.389993	-0.0722222	FALSE
CDK4	0.460574	0.277529	TRUE
CDK5	0.261103	0.329118	TRUE
CDK5RAP1	0.461246	0.270799	FALSE
CDK5RAP2	0.545879	0.60653	FALSE
CDK5RAP3	0.533789	0.354146	FALSE
CDK6	0.202773	0.257927	TRUE
CDK7	0.476375	0.372315	TRUE
CDK9	0.367872	0.120002	TRUE
CDKAL1	0.711043	0.507972	FALSE
CDKN1A	0.283343	0.604839	TRUE
CDKN1B	0.484042	0.599842	TRUE
CDKN1C	0.272905	0.452316	FALSE
CDKN2A	0.551248	0.780172	TRUE
CDKN2AIP	0.650352	0.622809	FALSE
CDKN2AIPNL	0.431447	0.164511	FALSE
CDKN2C	0.207824	0.346612	FALSE
CDS1	0.591196	0.50734	TRUE
CDS2	0.663162	0.548284	FALSE
CDV3	0.553539	0.451965	FALSE
CDYL	0.8426	0.72089	TRUE
CEACAM8	0.0604392	0.0358133	FALSE
CEBPA	0.240797	0.497937	TRUE
CEBPB	0.336733	0.560411	FALSE
CEBPG	0.64367	0.38109	FALSE
CEBPZ	0.581769	0.369151	FALSE
CELF1	0.237089	0.355126	FALSE
CELF2	-0.0538565	0.66294	FALSE
CELSR1	0.562561	0.438776	FALSE
CELSR2	0.241412	0.330367	FALSE
CENPB	0.600328	0.412466	TRUE
CENPC	0.421369	0.0822493	TRUE
CENPF	0.116403	0.651491	FALSE
CENPH	0.18755	0.263529	TRUE
CENPK	0.368127	0.170399	TRUE
CENPN	0.271343	0.0807848	TRUE
CENPV	0.121754	0.610237	FALSE
CEP104	0.651123	0.0243258	FALSE
CEP112	0.280629	-0.216883	FALSE
CEP120	0.560906	0.179933	FALSE
CEP128	0.541118	-0.0167669	FALSE
CEP135	0.392314	0.0489837	FALSE
CEP164	0.356245	0.0163763	TRUE
CEP170	0.260731	0.525203	FALSE
CEP170B	0.373183	0.270054	FALSE
CEP192	0.406678	0.239382	FALSE
CEP250	0.197539	0.281775	FALSE
CEP290	0.255192	0.0309232	TRUE
CEP350	0.306997	-0.0929485	FALSE
CEP41	0.5228	0.47832	FALSE
CEP44	0.577526	0.532001	FALSE
CEP57	0.662162	0.246635	FALSE
CEP63	0.568347	0.22406	FALSE
CEP68	0.285968	0.124689	FALSE
CEP76	0.496108	0.271725	FALSE
CEP78	0.494454	0.390183	FALSE
CEP85	0.598682	0.0781561	FALSE
CEP89	0.685966	0.612529	FALSE
CEP97	0.315593	0.447809	FALSE
CEPT1	0.45121	0.408153	FALSE
CERCAM	0.292103	0.742141	FALSE
CERS2	0.500228	0.525361	FALSE
CERS4	0.411348	0.535481	FALSE
CERS5	0.288229	0.144239	FALSE
CERS6	0.400878	0.41827	FALSE
CES1	0.00263608	0.757385	FALSE
CES2	0.656541	0.147222	FALSE
CES3	0.0147095	0.177335	FALSE
CETN3	0.343188	0.160502	FALSE
CETP	0.126471	0.203596	FALSE
CFD	0.428098	0.391825	FALSE
CFDP1	0.460903	0.30304	FALSE
CFHR1	-0.224316	0.247532	FALSE
CFHR2	0.108284	0.116403	FALSE
CFHR4	0.0933548	-0.0313403	FALSE
CFHR5	0.252532	0.0109835	FALSE
CFL1	0.218353	0.369901	TRUE
CFL2	0.52567	0.0252258	FALSE
CGGBP1	0.533308	0.519603	FALSE
CGN	0.245421	0.349277	FALSE
CGNL1	0.045402	0.472327	FALSE
CGREF1	0.102951	0.461791	FALSE
CHAC2	0.0162612	0.32804	FALSE
CHAF1B	0.343405	0.453109	TRUE
CHAMP1	0.324833	0.264341	FALSE
CHCHD1	0.191804	0.298698	FALSE
CHCHD4	0.629154	0.543736	FALSE
CHCHD5	0.33064	0.335624	FALSE
CHCHD6	0.483731	0.418225	TRUE
CHCHD7	0.536413	0.116398	FALSE
CHD1	0.655003	0.324006	FALSE
CHD3	0.303835	0.140432	TRUE
CHD5	0.439795	-0.0774887	FALSE
CHD6	0.329167	0.232972	FALSE
CHD7	0.346842	0.24192	FALSE
CHD8	0.240353	0.161379	TRUE
CHD9	0.568148	-0.0487127	FALSE
CHDH	0.257497	0.61921	FALSE
CHEK1	0.360576	0.580152	TRUE
CHEK2	0.357692	0.654923	TRUE
CHERP	0.216042	0.0505646	TRUE
CHGA	0.384252	0.20932	FALSE
CHGB	0.247445	0.5	FALSE
CHI3L1	0.111453	0.330451	FALSE
CHID1	0.557705	0.405964	FALSE
CHIT1	0.0668858	0.0299841	FALSE
CHL1	0.281902	0.729404	FALSE
CHMP1A	0.764184	0.671725	TRUE
CHMP1B	0.714181	0.56084	TRUE
CHMP2A	0.382101	0.379341	TRUE
CHMP2B	0.481742	0.324684	TRUE
CHMP4B	0.391056	0.448577	TRUE
CHMP4C	0.677463	0.193236	TRUE
CHMP5	0.413816	0.28794	TRUE
CHMP6	0.438887	0.257659	TRUE
CHORDC1	0.572998	0.736518	FALSE
CHP1	0.542779	0.127395	FALSE
CHRAC1	0.755516	0.461043	TRUE
CHST11	-0.0164977	0.577352	FALSE
CHST14	0.26647	0.544874	FALSE
CHST4	0.272987	0.261905	FALSE
CHSY1	0.2721	0.33408	FALSE
CHSY3	-0.0233977	0.751354	FALSE
CHTF18	0.371245	0.127296	TRUE
CHTF8	0.530949	0.0235893	TRUE
CHTOP	0.22653	0.0107022	TRUE
CHUK	0.607383	0.359087	TRUE
CIAO1	0.493247	0.00438121	TRUE
CIAPIN1	0.71755	0.770416	FALSE
CIB1	0.377454	0.356301	TRUE
CIC	0.305833	0.213731	TRUE
CILP2	0.188573	0.642796	FALSE
CINP	0.621896	0.00621996	FALSE
CIR1	0.162632	0.158101	FALSE
CISD1	0.189752	0.255556	FALSE
CISD2	0.394316	0.392977	TRUE
CIZ1	0.503499	0.243315	FALSE
CKAP2	0.406835	0.666001	FALSE
CKAP4	0.361809	0.717028	FALSE
CKAP5	0.242141	0.293501	TRUE
CKB	0.346446	0.75093	TRUE
CKM	-0.0100599	0.216114	FALSE
CKMT2	0.16309	0.441355	FALSE
CKS1B	0.154242	0.276956	TRUE
CKS2	0.318139	0.508123	FALSE
CLC	-0.0327231	0.32209	FALSE
CLCC1	0.496014	0.465108	FALSE
CLCN3	0.742228	0.480646	FALSE
CLCN7	0.356469	0.201152	FALSE
CLDN1	0.353567	0.796612	TRUE
CLDN11	-0.117162	0.681596	FALSE
CLDN16	0.254394	0.623006	FALSE
CLDN3	0.180484	0.273893	FALSE
CLDN4	0.423784	0.45673	FALSE
CLDN5	0.0247386	0.694783	FALSE
CLDN6	0.391989	0.764722	FALSE
CLDN7	0.174138	0.474538	FALSE
CLDND1	0.600878	-0.0294264	FALSE
CLEC11A	0.187369	0.488821	FALSE
CLEC14A	0.0998442	0.0864662	FALSE
CLEC16A	0.263961	0.115956	FALSE
CLEC5A	-0.0596384	0.532468	FALSE
CLGN	0.346389	0.609011	FALSE
CLIC3	0.102819	0.549789	FALSE
CLIC4	0.450159	0.755239	FALSE
CLIC5	0.0463988	0.705164	TRUE
CLIC6	0.049162	0.519986	FALSE
CLINT1	0.713913	0.622696	FALSE
CLIP1	0.0955729	0.0964663	TRUE
CLK2	0.172248	0.244712	FALSE
CLK3	0.571583	0.189737	FALSE
CLMN	0.439578	0.56949	FALSE
CLN3	0.552895	0.202586	FALSE
CLN5	0.382851	0.547663	FALSE
CLNS1A	0.66291	0.41486	TRUE
CLP1	0.45082	0.134056	TRUE
CLPB	0.438719	0.34939	FALSE
CLPP	0.637674	0.478266	TRUE
CLPTM1	0.571305	0.359611	FALSE
CLPTM1L	0.683002	0.519219	FALSE
CLPX	0.557216	0.360027	TRUE
CLSTN2	0.0548692	0.325805	FALSE
CLTA	0.320089	0.171409	FALSE
CLTB	0.377809	0.495958	FALSE
CLTC	0.284965	0.411521	TRUE
CLTCL1	0.388817	-0.0620822	FALSE
CLU	0.0927683	0.453613	FALSE
CLUH	0.400696	0.192593	FALSE
CLYBL	0.467317	0.668338	FALSE
CMA1	-0.0504181	0.335001	FALSE
CMAS	0.657077	0.67622	FALSE
CMBL	0.38293	0.853884	FALSE
CMC1	0.506431	0.369377	TRUE
CMC2	0.453257	0.360366	FALSE
CMIP	0.164962	-0.123329	FALSE
CMPK1	0.359911	0.587173	FALSE
CMPK2	0.232812	0.864205	FALSE
CMTM3	0.418202	0.45856	FALSE
CMTM4	0.51202	0.558956	FALSE
CMTM6	0.359669	0.585532	FALSE
CMYA5	0.172833	0.0357143	FALSE
CNBP	0.423602	0.31245	FALSE
CNDP2	0.569509	0.574706	FALSE
CNKSR1	0.486412	0.117818	TRUE
CNN1	-0.23232	0.752846	FALSE
CNN2	0.484174	0.751468	FALSE
CNNM2	0.424936	0.114364	FALSE
CNNM3	0.315937	0.306895	FALSE
CNNM4	0.342819	0.137176	FALSE
CNOT10	0.60409	0.0672313	TRUE
CNOT11	0.520359	0.154088	TRUE
CNOT2	0.798481	0.324074	TRUE
CNOT3	0.617953	0.191012	TRUE
CNOT4	0.485661	0.311743	FALSE
CNOT6	0.663994	0.219522	TRUE
CNOT6L	0.4765	0.297719	TRUE
CNOT7	0.725195	0.426942	TRUE
CNOT8	0.329405	0.0650315	TRUE
CNP	0.441507	0.429201	FALSE
CNPY4	-0.10011	0.257218	FALSE
CNRIP1	0.0155385	0.627886	FALSE
CNST	0.504297	0.412288	FALSE
CNTFR	0.422299	0.350195	TRUE
CNTN1	-0.0709246	0.678478	FALSE
CNTN4	0.388927	0.00421053	FALSE
CNTNAP1	0.0863087	0.316019	TRUE
CNTRL	0.428222	0.229492	FALSE
CNTROB	0.564961	0.176173	FALSE
COA1	0.35067	0.251003	TRUE
COA3	0.411033	0.449006	TRUE
COA4	0.623112	0.428672	FALSE
COA5	0.53012	0.265866	FALSE
COA6	0.443643	0.345348	FALSE
COASY	0.535391	0.568812	FALSE
COBL	0.384912	0.5051	FALSE
COBLL1	0.0937799	0.47561	TRUE
COCH	0.285356	0.399015	FALSE
COG1	0.290014	-0.13676	TRUE
COG2	0.713969	0.0636631	TRUE
COG4	0.708861	0.334192	TRUE
COG5	0.63389	0.214815	TRUE
COG6	0.676981	0.336969	TRUE
COG7	0.482728	0.0987579	TRUE
COIL	0.798809	0.662444	TRUE
COL10A1	0.0612119	0.55061	FALSE
COL11A1	-0.0927805	0.646116	FALSE
COL12A1	0.212854	0.533062	FALSE
COL14A1	-0.145108	0.531143	FALSE
COL15A1	0.39636	0.456323	FALSE
COL16A1	0.18008	0.531518	FALSE
COL18A1	0.314862	0.353659	TRUE
COL1A2	-0.133059	0.399765	FALSE
COL21A1	-0.00966129	0.475442	FALSE
COL22A1	0.155421	-0.267488	FALSE
COL28A1	0.0305221	-0.0976923	FALSE
COL2A1	0.0673233	0.147891	FALSE
COL4A1	0.145083	0.493496	FALSE
COL4A2	0.144932	0.436565	FALSE
COL4A3	-0.131096	0.0126958	TRUE
COL4A3BP	0.510285	0.820325	FALSE
COL5A1	0.09592	0.65612	FALSE
COL5A2	-0.14771	0.557882	FALSE
COL5A3	-0.0562737	0.229472	FALSE
COL6A1	0.104717	0.424685	FALSE
COL6A2	0.101046	0.414003	FALSE
COL6A3	-0.171593	0.526445	TRUE
COL6A5	0.161793	0.664172	FALSE
COL6A6	0.126118	0.788303	FALSE
COL8A2	0.00504758	0.752694	FALSE
COL9A2	0.303585	0.671645	FALSE
COLEC11	0.0390743	0.649264	FALSE
COLGALT1	0.398198	0.720284	TRUE
COLGALT2	0.187793	0.247425	FALSE
COMMD2	0.589183	0.0730469	TRUE
COMMD4	0.502051	0.0871951	TRUE
COMMD6	0.406752	-0.0581642	TRUE
COMMD7	0.0516546	0.00586423	TRUE
COMMD8	0.464584	0.253455	TRUE
COMMD9	0.269283	-0.0894986	TRUE
COMP	-0.0357621	0.860727	FALSE
COMTD1	0.284716	0.483897	FALSE
COPA	0.212524	0.13031	FALSE
COPB2	0.526903	0.415967	TRUE
COPE	0.307983	0.0756298	FALSE
COPG1	0.571976	0.0957543	FALSE
COPS2	0.676074	-0.106888	TRUE
COPS3	0.291664	-0.0903794	TRUE
COPS4	0.510161	0.157294	TRUE
COPS5	0.685017	-0.0611936	TRUE
COPS6	0.604106	0.226255	TRUE
COPS7A	0.665853	0.173058	TRUE
COPS7B	0.65192	0.447764	FALSE
COPS8	0.633411	0.0478997	TRUE
COPZ1	0.622421	0.124164	FALSE
COQ10B	0.51696	0.0491346	FALSE
COQ3	0.241193	0.163752	FALSE
COQ5	0.705187	0.332227	FALSE
COQ6	0.322499	0.146047	FALSE
COQ7	0.696058	0.448351	FALSE
COQ9	0.524874	0.39022	FALSE
CORO2A	0.589588	0.662489	TRUE
CORO2B	-0.0611757	0.486382	FALSE
CORO6	0.144841	0.292271	FALSE
COTL1	0.465395	0.61626	FALSE
COX11	0.483302	0.315696	FALSE
COX15	0.484854	0.251197	TRUE
COX18	0.584011	0.340312	FALSE
COX19	0.233743	0.208452	FALSE
COX20	0.00139908	0.335925	FALSE
COX4I1	0.586085	0.364747	TRUE
COX5A	0.537817	0.356264	TRUE
COX5B	0.134595	0.225632	FALSE
COX6B1	0.224217	0.25078	FALSE
COX6C	0.637942	0.340899	TRUE
COX7A2	0.307442	0.149619	FALSE
COX7A2L	0.489064	0.121274	FALSE
COX7C	0.433857	0.357294	FALSE
CPA3	0.178394	0.660923	FALSE
CPAMD8	0.367091	0.464286	FALSE
CPB2	0.0922297	-0.0651135	FALSE
CPD	0.411867	0.715063	FALSE
CPE	-0.0578605	0.583559	FALSE
CPEB2	0.247163	0.206819	FALSE
CPEB4	0.505701	0.347559	FALSE
CPLX2	0.143515	0.843111	TRUE
CPM	0.0160041	0.731542	FALSE
CPN1	0.130604	-0.00545277	TRUE
CPNE2	0.286232	0.62229	FALSE
CPNE3	0.632404	0.673389	FALSE
CPNE5	-0.0540275	0.0738725	FALSE
CPNE8	-0.00715784	0.321793	FALSE
CPOX	0.43384	0.564747	FALSE
CPPED1	0.239212	0.442254	FALSE
CPQ	0.316105	0.453907	FALSE
CPS1	0.0301278	-0.0108175	FALSE
CPSF2	0.754282	0.130014	TRUE
CPSF3	0.691658	0.333966	TRUE
CPSF4	0.066724	0.0455301	TRUE
CPSF6	0.231284	0.0559133	TRUE
CPSF7	0.189012	0.25122	TRUE
CPT1A	0.206608	0.438835	FALSE
CPT2	0.619608	0.526784	FALSE
CPVL	0.0527953	0.5028	FALSE
CPXM1	0.0855761	0.682407	FALSE
CPXM2	0.0193494	0.31346	FALSE
CR1	0.044833	0.267576	FALSE
CR2	0.0329613	0.1	FALSE
CRABP1	0.203277	0.772616	FALSE
CRABP2	0.133459	0.778189	FALSE
CRADD	0.42149	0.221229	TRUE
CRB2	0.203662	0.520566	FALSE
CRBN	0.558152	0.301242	TRUE
CREB1	0.523123	0.184033	TRUE
CREBBP	0.332853	0.0825773	TRUE
CREG1	0.51484	0.185501	FALSE
CRELD2	0.718143	0.55822	FALSE
CREM	0.285297	0.169512	FALSE
CRIM1	0.542388	0.195551	FALSE
CRIPT	0.3841	0.402145	FALSE
CRISP3	0.289986	-0.00807895	FALSE
CRISPLD2	0.132026	0.734271	FALSE
CRK	0.587652	0.464774	TRUE
CRKL	0.517505	0.394937	FALSE
CRLF3	0.3372	0.440291	FALSE
CRMP1	-0.00923896	0.413302	TRUE
CRNKL1	0.69187	0.598148	TRUE
CRNN	0.0556566	0.484902	FALSE
CROCC	0.352892	0.18234	FALSE
CROT	0.569201	0.591938	FALSE
CRP	-0.109877	-0.11757	FALSE
CRTAC1	0.310826	0.557535	FALSE
CRTAP	0.214933	0.22229	FALSE
CRTC1	0.213604	0.195247	FALSE
CRTC3	0.279378	0.499368	FALSE
CRYAB	0.206559	0.824706	FALSE
CRYBG3	0.185239	0.385342	FALSE
CRYL1	0.550743	0.654562	FALSE
CRYM	0.154256	0.528869	FALSE
CRYZ	0.44754	0.637173	FALSE
CRYZL1	0.690944	0.429223	FALSE
CSAD	0.0685648	0.129434	FALSE
CSE1L	0.534039	0.571454	FALSE
CSF1R	0.0333006	0.510338	FALSE
CSGALNACT2	-0.0430256	0.260591	FALSE
CSK	0.396242	0.544061	FALSE
CSNK1A1	0.735748	0.377575	FALSE
CSNK1D	0.613734	0.344424	FALSE
CSNK1G1	0.258012	0.3113	FALSE
CSNK1G3	0.7935	0.195867	FALSE
CSNK2A1	0.617198	0.398433	TRUE
CSNK2A2	0.569325	0.358266	TRUE
CSNK2A3	0.0788112	0.390854	FALSE
CSPG4	0.0138216	0.396183	TRUE
CSPP1	0.750048	0.114436	FALSE
CSRP1	0.453546	0.512579	FALSE
CSRP2	0.246648	0.406888	FALSE
CSRP3	0.11777	0.167784	FALSE
CST3	0.567622	0.679336	FALSE
CST4	-0.177027	-0.12167	FALSE
CST5	0.255029	0.3	FALSE
CST6	0.180222	0.128443	FALSE
CSTA	0.027177	0.25436	FALSE
CSTB	0.385323	0.380849	FALSE
CSTF1	0.628599	0.0385501	TRUE
CSTF2T	0.366756	0.21888	FALSE
CSTF3	0.4226	0.184982	TRUE
CTAGE5	0.448759	0.32014	TRUE
CTBP1	0.831169	0.496635	TRUE
CTBP2	0.512575	0.591554	TRUE
CTC1	0.395794	0.347275	TRUE
CTCF	0.411904	0.22893	TRUE
CTCFL	-0.0224645	0.085924	FALSE
CTDNEP1	0.399421	-0.00233037	FALSE
CTDP1	0.599733	0.538866	TRUE
CTDSP1	0.5603	0.168201	FALSE
CTDSPL	0.672505	0.0653975	FALSE
CTDSPL2	0.537056	0.476732	FALSE
CTF1	0.290364	0.507128	FALSE
CTH	0.389115	0.623848	FALSE
CTHRC1	0.0834424	0.79379	FALSE
CTIF	0.378148	0.650136	FALSE
CTNNA1	0.590923	0.0693767	TRUE
CTNNA2	0.0953449	0.0628536	FALSE
CTNNAL1	0.394297	0.218595	TRUE
CTNNB1	0.485684	0.215244	TRUE
CTNNBL1	0.607499	0.346155	TRUE
CTNND2	0.0663549	-0.0670824	TRUE
CTR9	0.721823	0.373148	TRUE
CTSA	0.26628	0.594651	TRUE
CTSB	0.29039	0.624955	FALSE
CTSF	0.202764	0.498127	FALSE
CTSG	-0.0845305	0.472947	TRUE
CTSH	0.206913	0.511608	FALSE
CTSL	0.265817	0.316386	FALSE
CTSS	0.0104699	0.417969	FALSE
CTSV	0.440174	0.129449	FALSE
CTSZ	0.196787	0.556569	FALSE
CTTN	0.517243	0.517706	TRUE
CTTNBP2	0.217651	0.31728	FALSE
CTU1	0.42965	0.0255127	FALSE
CTU2	0.57157	0.300709	FALSE
CUEDC1	0.399992	0.22623	FALSE
CUEDC2	0.71667	0.44314	FALSE
CUL1	0.64652	0.505126	TRUE
CUL2	0.318198	0.269286	TRUE
CUL3	0.516809	0.316296	TRUE
CUL4A	0.807986	0.614792	TRUE
CUL9	0.258455	0.153478	TRUE
CUX1	0.342994	0.294399	FALSE
CWC22	0.52603	0.22168	TRUE
CWC25	0.681964	0.280952	FALSE
CWC27	0.524053	0.32369	TRUE
CWF19L1	0.630906	0.666893	FALSE
CWF19L2	0.532518	0.325723	FALSE
CXADR	0.633913	0.56425	FALSE
CXCL10	0.234809	0.696945	FALSE
CXCL12	-0.110419	0.58785	FALSE
CXCL13	0.141764	0.580702	FALSE
CXCL14	-0.0434176	0.742353	FALSE
CXCL16	0.304209	0.143411	FALSE
CXCR4	0.19902	0.626343	TRUE
CXXC1	0.705505	-0.0130307	TRUE
CYB561	0.673289	0.575294	FALSE
CYB5A	0.473615	0.591102	FALSE
CYB5B	0.458297	0.31154	FALSE
CYB5R1	0.10157	0.583344	FALSE
CYB5R2	0.239273	0.65189	FALSE
CYB5R3	0.377377	0.430381	FALSE
CYB5R4	0.381126	0.518539	FALSE
CYBA	0.334429	0.28655	FALSE
CYBRD1	0.375721	0.597087	FALSE
CYCS	0.300943	0.0770325	TRUE
CYFIP1	0.637937	0.0999548	TRUE
CYFIP2	0.38331	0.191079	FALSE
CYGB	-0.169789	0.682159	FALSE
CYHR1	0.619239	0.276958	FALSE
CYLD	0.526999	0.458838	TRUE
CYP11A1	0.355786	0.203571	FALSE
CYP20A1	0.426304	0.280623	FALSE
CYP27A1	0.266768	0.555132	FALSE
CYP2S1	0.126885	0.671296	FALSE
CYP2U1	0.384513	0.521771	FALSE
CYP4A11	0.0863539	-0.178731	FALSE
CYP4F11	0.0520368	0.649845	FALSE
CYP4F22	-0.178577	-0.363323	FALSE
CYP4F3	0.0599521	0.306799	FALSE
CYP51A1	0.368893	0.649418	FALSE
CYP7B1	-0.0293314	0.771675	FALSE
CYR61	0.00530417	0.689837	TRUE
CYTH1	0.25523	0.416549	FALSE
CYTH2	0.415779	0.193689	FALSE
CYTH3	0.49637	0.450296	TRUE
CYTH4	0.276496	0.309043	FALSE
D2HGDH	0.265332	0.0404674	FALSE
DAAM1	0.369234	0.633288	FALSE
DAAM2	0.273657	0.271529	FALSE
DAB2	-0.0289616	0.715063	FALSE
DAB2IP	0.477758	0.423374	FALSE
DACH1	0.327685	0.819219	FALSE
DAD1	0.4788	0.155759	TRUE
DAGLB	0.716082	0.327175	FALSE
DALRD3	-0.074098	0.126327	FALSE
DAP	0.555505	0.518948	FALSE
DAP3	0.384338	0.203505	TRUE
DAPK1	0.318894	0.436676	FALSE
DAPK2	0.361218	0.0971996	FALSE
DAPK3	0.411039	0.436881	FALSE
DAPL1	0.360738	0.759023	FALSE
DAPP1	0.3563	0.358097	FALSE
DARS	0.643391	0.571748	TRUE
DARS2	0.316065	0.440282	FALSE
DAZAP1	0.268917	0.341409	FALSE
DAZAP2	0.612335	0.194557	FALSE
DBI	0.121744	0.436834	FALSE
DBR1	0.695596	0.536743	FALSE
DCAF10	0.688224	0.182148	FALSE
DCAF13	0.681337	0.346703	FALSE
DCAF16	0.443939	0.271861	FALSE
DCAF5	0.459775	0.297566	FALSE
DCAF6	0.329796	0.364995	FALSE
DCAF7	0.426257	0.0176659	FALSE
DCAKD	0.396668	0.41757	FALSE
DCBLD2	0.116552	0.365786	FALSE
DCDC2	0.35033	0.668182	TRUE
DCK	0.493847	0.429237	FALSE
DCLK1	0.223592	0.770212	FALSE
DCLK2	0.24348	0.423374	FALSE
DCN	0.0017877	0.539566	FALSE
DCP1B	0.711852	0.487489	FALSE
DCPS	0.473698	0.455204	FALSE
DCTD	0.72973	0.742909	FALSE
DCTN2	0.631649	0.424164	FALSE
DCTN4	0.586197	0.0996838	FALSE
DCTN5	0.536882	0.101282	FALSE
DCTN6	0.60771	0.125542	FALSE
DCTPP1	0.550693	0.543044	FALSE
DCUN1D1	0.484656	0.54387	FALSE
DCUN1D3	0.196362	0.276025	FALSE
DCUN1D4	0.479317	0.354906	FALSE
DCUN1D5	0.42417	0.205194	FALSE
DCXR	0.466483	0.6028	FALSE
DDA1	0.518759	0.112918	FALSE
DDAH1	0.147537	0.405452	FALSE
DDB1	0.341303	0.208639	TRUE
DDB2	0.320221	0.705063	TRUE
DDHD1	0.48575	0.253932	FALSE
DDHD2	0.678862	0.521048	FALSE
DDR2	-0.090598	0.43198	FALSE
DDRGK1	0.581297	0.15041	FALSE
DDX1	0.536527	0.270709	TRUE
DDX10	0.410469	0.293857	FALSE
DDX11	0.447573	0.408947	TRUE
DDX18	0.629181	0.549571	FALSE
DDX19A	0.548786	0.45766	FALSE
DDX19B	0.491281	0.478825	FALSE
DDX20	0.531007	0.183198	TRUE
DDX21	0.47861	0.564744	TRUE
DDX24	0.602616	0.262037	FALSE
DDX27	0.678606	0.307001	TRUE
DDX28	0.584745	0.150422	TRUE
DDX31	0.765298	0.276739	FALSE
DDX39A	0.491929	0.12902	TRUE
DDX4	0.397358	0.0556623	FALSE
DDX41	0.451446	0.179853	TRUE
DDX42	0.581528	0.395677	TRUE
DDX47	0.583494	0.426832	FALSE
DDX49	0.64404	0.127439	FALSE
DDX50	0.3653	0.417938	FALSE
DDX51	0.582536	0.37579	FALSE
DDX52	0.455171	0.270665	FALSE
DDX54	0.503722	0.229766	FALSE
DDX55	0.495477	0.271114	FALSE
DDX59	0.475526	0.261924	FALSE
DDX6	0.545608	0.222855	TRUE
DDX60L	0.140927	0.0365458	FALSE
DECR1	0.561094	0.656978	FALSE
DECR2	0.359003	0.3787	FALSE
DEF6	0.254155	0.536507	FALSE
DEFA5	-0.164153	-0.0574504	FALSE
DEFA6	0.0354827	0.244949	FALSE
DEFB1	0.166018	0.663578	FALSE
DEGS1	0.0675993	-0.0905202	FALSE
DEK	0.644087	0.54878	TRUE
DENND1A	0.512946	0.196545	FALSE
DENND1C	-0.0650286	0.161588	FALSE
DENND2A	0.214427	0.0449032	FALSE
DENND2D	0.434426	0.686811	FALSE
DENND3	0.190025	0.640831	FALSE
DENND4A	0.418339	0.321135	FALSE
DENND4B	0.221877	0.236585	FALSE
DENND4C	0.552266	0.463904	FALSE
DENND5A	0.429534	-0.0107986	FALSE
DENND5B	0.276871	0.0992402	FALSE
DENND6A	0.491392	0.342956	FALSE
DENR	0.506723	0.47161	FALSE
DEPDC5	0.727093	0.250198	TRUE
DEPTOR	0.454824	0.854901	FALSE
DERA	0.481207	0.33505	FALSE
DERL1	0.722809	0.390605	TRUE
DERL3	0.0563692	0.325022	FALSE
DES	0.0664656	0.432023	FALSE
DESI1	0.553181	0.185899	FALSE
DESI2	0.482314	0.220314	FALSE
DFFA	0.602953	0.513776	FALSE
DFFB	0.652189	0.574481	FALSE
DFNA5	0.271032	0.536314	FALSE
DGKA	-0.00958755	0.583107	FALSE
DGKE	0.262434	0.257231	FALSE
DGKQ	0.65364	0.208175	FALSE
DGKZ	0.168676	0.108362	TRUE
DGUOK	0.576135	0.234666	FALSE
DHCR24	0.318871	0.5298	FALSE
DHCR7	0.657587	0.567426	FALSE
DHFR	0.428514	0.706007	FALSE
DHODH	0.515353	0.595235	FALSE
DHPS	0.485123	0.330233	FALSE
DHRS1	0.141691	0.65793	FALSE
DHRS11	0.388386	0.686789	FALSE
DHRS2	0.295596	0.728523	FALSE
DHRS3	0.115619	0.616238	FALSE
DHRS7	0.474527	0.602394	FALSE
DHRS7B	0.304962	0.527733	FALSE
DHRS9	-0.0961323	0.660714	FALSE
DHX15	0.75071	0.490673	TRUE
DHX29	0.584166	0.629562	FALSE
DHX30	0.381394	0.312083	TRUE
DHX32	0.531415	0.353004	FALSE
DHX33	0.405028	-0.0677288	FALSE
DHX34	0.36432	-0.0164773	FALSE
DHX35	0.359925	0.380056	TRUE
DHX36	0.832911	0.755872	FALSE
DHX37	0.547861	0.172787	FALSE
DHX38	0.524055	0.497471	TRUE
DHX40	0.488998	0.320445	FALSE
DHX57	0.528648	0.526987	FALSE
DHX58	0.473087	0.574639	FALSE
DHX9	0.423392	0.3822	TRUE
DIABLO	0.598667	0.527936	FALSE
DIAPH3	0.296114	0.0173797	FALSE
DICER1	0.433758	0.241644	TRUE
DIDO1	0.56673	0.0511521	FALSE
DIEXF	0.570559	0.38864	FALSE
DIMT1	0.570707	0.673284	FALSE
DIP2B	0.0357258	0.332453	FALSE
DIP2C	0.400415	0.454201	FALSE
DIRC2	0.289833	0.237867	FALSE
DIS3	0.438299	0.300849	TRUE
DIS3L	0.649557	0.194761	TRUE
DIS3L2	0.435144	0.444537	FALSE
DKK3	0.0413371	0.351414	FALSE
DKK4	0.16515	0.507346	FALSE
DLAT	0.661647	0.600519	FALSE
DLC1	0.271934	-0.0360902	TRUE
DLD	0.61777	0.633085	TRUE
DLG1	0.736198	0.540334	TRUE
DLG2	0.00651044	-0.132558	FALSE
DLG4	-0.112191	0.161271	TRUE
DLG5	0.422258	0.325994	TRUE
DLGAP1	0.400637	0.739639	TRUE
DLGAP4	0.240866	0.157371	FALSE
DLGAP5	0.359055	0.754846	FALSE
DLST	0.597487	0.498238	TRUE
DMAP1	0.526576	0.187986	TRUE
DMBT1	-0.125716	0.484323	FALSE
DMTN	0.595106	0.179968	TRUE
DMXL1	0.484693	0.307317	FALSE
DMXL2	0.31211	0.378139	FALSE
DNAH10	-0.186991	-0.0873388	FALSE
DNAH12	0.384615	-0.163964	FALSE
DNAH14	0.442089	0.185994	FALSE
DNAH3	0.300411	0.137847	FALSE
DNAH5	0.0681366	0.060362	FALSE
DNAH6	0.188653	0.230049	FALSE
DNAH7	-0.0865326	-0.0187738	FALSE
DNAH8	0.111026	-0.0158124	FALSE
DNAH9	0.262876	-0.267456	FALSE
DNAJA1	0.450383	0.499752	FALSE
DNAJA2	0.715871	0.648735	FALSE
DNAJA3	0.69769	0.683762	FALSE
DNAJA4	0.497027	0.68565	FALSE
DNAJB1	0.755718	0.679923	TRUE
DNAJB11	0.639403	0.410547	FALSE
DNAJB12	0.380495	0.46187	FALSE
DNAJB14	0.693376	0.31418	FALSE
DNAJB2	0.440218	0.530939	FALSE
DNAJB4	0.0110293	0.113174	FALSE
DNAJB5	0.313842	0.554577	FALSE
DNAJB6	0.286419	0.428526	FALSE
DNAJC1	0.00627101	0.58575	FALSE
DNAJC10	0.555533	0.546793	FALSE
DNAJC11	0.760237	0.470845	TRUE
DNAJC13	0.486406	0.592358	FALSE
DNAJC16	0.704732	0.556391	FALSE
DNAJC17	0.553251	0.450123	FALSE
DNAJC19	0.320709	0.263087	FALSE
DNAJC2	0.497342	0.423442	FALSE
DNAJC21	0.653262	0.488686	FALSE
DNAJC3	0.532391	0.590767	TRUE
DNAJC30	0.418652	0.404329	FALSE
DNAJC7	0.362135	0.460682	TRUE
DNAJC8	0.375964	0.549651	TRUE
DNAL1	0.453123	0.398103	FALSE
DNALI1	0.321926	0.503248	FALSE
DNASE1L3	-0.248455	-0.3	FALSE
DNASE2	0.578093	0.710953	FALSE
DNLZ	0.510777	0.342683	FALSE
DNM1L	0.52622	0.66224	TRUE
DNM2	0.464156	0.301179	TRUE
DNM3	0.148148	-0.0828733	FALSE
DNMBP	0.22516	0.326061	FALSE
DNMT1	0.171628	0.32883	TRUE
DNMT3A	0.420497	0.709869	TRUE
DNPH1	0.602959	0.476649	FALSE
DNTTIP1	0.555331	0.181617	TRUE
DNTTIP2	0.581471	0.0275973	TRUE
DOCK10	-0.0479761	0.491893	FALSE
DOCK2	0.036963	0.76766	TRUE
DOCK4	0.00150783	0.552462	FALSE
DOCK5	0.4057	0.385434	FALSE
DOCK6	0.214338	0.390628	FALSE
DOCK7	0.401169	0.469625	TRUE
DOCK8	0.466667	0.552145	TRUE
DOCK9	0.360032	0.557701	FALSE
DOHH	0.52514	0.442864	FALSE
DOK1	-0.144096	0.295757	FALSE
DOK2	0.0710384	0.594286	FALSE
DOK3	-0.0094563	0.44852	FALSE
DOLK	0.510502	0.245833	FALSE
DOLPP1	0.696278	0.596744	FALSE
DOPEY1	0.422944	0.208391	FALSE
DOPEY2	0.240371	0.406052	FALSE
DPAGT1	0.475552	0.331458	FALSE
DPCD	0.61297	0.4528	FALSE
DPEP1	0.271011	0.531472	FALSE
DPEP3	0.229992	0.449773	FALSE
DPF2	0.42441	-0.144467	TRUE
DPH2	0.694929	0.426139	FALSE
DPH5	0.399511	0.399458	FALSE
DPH7	0.595023	0.111795	FALSE
DPM1	0.51224	0.0377324	TRUE
DPM3	0.300065	0.037738	TRUE
DPP3	0.087807	0.254117	FALSE
DPP4	0.102064	0.593739	TRUE
DPP7	0.522162	0.477371	FALSE
DPP8	0.427215	-0.122177	FALSE
DPP9	0.371124	0.365511	FALSE
DPT	-0.175244	0.287873	FALSE
DPY19L1	0.29084	0.560456	FALSE
DPY19L3	0.578407	0.457317	FALSE
DPY19L4	0.529428	0.395037	FALSE
DPY30	0.522353	0.494142	TRUE
DPYS	0.0732752	0.22287	FALSE
DPYSL2	0.41151	0.806662	FALSE
DPYSL3	0.239535	0.846432	FALSE
DPYSL4	0.0411414	0.22164	FALSE
DPYSL5	0.229273	0.401713	FALSE
DR1	0.388872	0.196791	TRUE
DRAP1	0.475784	0.142909	TRUE
DRG1	0.50852	0.241215	FALSE
DRG2	0.593712	0.426716	FALSE
DROSHA	0.45606	0.314566	TRUE
DSC1	0.0511606	0.090615	FALSE
DSC2	0.268229	0.550895	FALSE
DSC3	0.192804	0.139127	FALSE
DSCC1	0.303007	0.0592675	TRUE
DSG1	0.23762	-0.0441916	FALSE
DSG2	0.646555	0.332584	FALSE
DSG3	0.125607	0.334338	FALSE
DSN1	0.404982	0.123681	FALSE
DSP	0.439093	0.138302	FALSE
DST	0.198826	0.428907	FALSE
DSTN	0.608493	0.145596	FALSE
DSTYK	0.201856	0.152442	FALSE
DTNA	0.221943	0.203659	TRUE
DTNB	0.678829	0.382023	FALSE
DTNBP1	0.64893	0.354743	TRUE
DTWD1	0.525519	0.283363	FALSE
DTWD2	0.753917	0.507563	FALSE
DTX2	0.32159	0.22156	FALSE
DTX3	0.235006	0.550657	FALSE
DTX3L	0.512891	0.799752	TRUE
DTYMK	0.497768	0.534508	FALSE
DUS1L	0.609947	0.559666	FALSE
DUSP11	0.333516	0.369627	FALSE
DUSP12	0.324241	0.162891	FALSE
DUSP22	0.663906	0.251257	FALSE
DUSP23	0.0639251	0.0411248	FALSE
DUSP3	0.489541	0.539024	FALSE
DUT	0.599431	0.576829	FALSE
DVL1	0.503277	0.236158	TRUE
DVL2	0.58793	0.361199	TRUE
DVL3	0.253008	0.194144	FALSE
DYM	0.627136	0.139002	FALSE
DYNC1H1	0.256565	0.389056	TRUE
DYNC1I1	-0.00670382	-0.00523939	TRUE
DYNC1I2	0.356304	0.140899	FALSE
DYNC1LI1	0.497781	0.669806	TRUE
DYNC1LI2	0.623093	0.391585	FALSE
DYNC2H1	0.162269	0.35752	TRUE
DYNC2LI1	0.411378	0.240161	TRUE
DYNLL1	0.241145	0.260365	TRUE
DYNLL2	0.586869	0.611653	TRUE
DYNLT1	0.43997	0.175248	TRUE
DYRK1A	0.46556	0.311292	FALSE
DYRK1B	0.176048	0.18787	FALSE
DYSF	0.148109	0.437579	TRUE
DZIP3	0.324523	0.735714	FALSE
E2F3	0.761796	0.356522	FALSE
E2F4	0.755653	0.294648	TRUE
E2F5	0.509801	0.283239	TRUE
E2F6	0.616438	0.293449	TRUE
E4F1	0.491214	0.0643432	FALSE
EAF1	0.454543	0.320716	TRUE
EAPP	0.573936	0.259248	FALSE
EBNA1BP2	0.546331	0.243586	TRUE
ECE1	0.476799	0.602529	FALSE
ECE2	0.486719	0.563194	FALSE
ECH1	0.560306	0.577994	FALSE
ECHDC1	0.512447	0.438144	FALSE
ECHDC2	0.498634	0.262716	FALSE
ECHS1	0.593339	0.523622	FALSE
ECI1	0.560911	0.677104	FALSE
ECI2	0.438875	0.577846	FALSE
ECM1	-0.109511	0.625288	FALSE
ECM2	0.081289	0.228728	FALSE
ECT2	0.70499	0.706075	TRUE
EDC3	0.747539	0.47893	TRUE
EDC4	0.227023	0.233973	TRUE
EDEM3	0.478496	0.175836	FALSE
EDF1	0.611406	0.456586	FALSE
EDNRA	0.345064	0.751174	TRUE
EEF1A1	0.174916	0.280264	TRUE
EEF1A2	0.0559175	-0.264176	FALSE
EEF1B2	0.26024	0.434486	FALSE
EEF2	0.548087	0.364964	TRUE
EEFSEC	0.411939	0.377456	FALSE
EEPD1	0.260613	0.536586	FALSE
EFEMP1	-0.0157869	0.71364	FALSE
EFEMP2	0.093259	0.233805	FALSE
EFHC1	0.302914	0.275315	FALSE
EFHD1	0.179717	0.457475	FALSE
EFHD2	0.442547	0.702371	FALSE
EFNA1	0.0953247	0.228963	FALSE
EFNA5	0.324574	0.285337	FALSE
EFNB2	0.402907	0.752951	FALSE
EFR3A	0.624426	0.537037	FALSE
EFR3B	0.188261	-0.0939112	FALSE
EFS	0.337034	0.694405	FALSE
EFTUD2	0.571208	-0.020822	TRUE
EGFL7	0.483204	0.421337	FALSE
EGFLAM	0.0289047	0.129677	FALSE
EGFR	0.215833	0.567435	TRUE
EGLN1	0.481791	0.516283	TRUE
EHBP1	0.66939	0.520416	TRUE
EHBP1L1	0.126979	0.345539	FALSE
EHD1	0.258515	0.548442	FALSE
EHD2	0.26404	0.598803	FALSE
EHD3	0.494823	0.095822	FALSE
EHD4	0.524973	0.540489	FALSE
EHF	0.321004	0.672064	FALSE
EHHADH	0.462222	0.503771	FALSE
EHMT1	0.389991	0.312349	TRUE
EIF1	0.604994	0.214092	FALSE
EIF1AD	-0.208849	0.0509121	FALSE
EIF1B	0.64544	0.227394	FALSE
EIF2A	0.421032	0.434327	FALSE
EIF2AK1	0.570347	0.138478	FALSE
EIF2AK2	0.174036	0.630886	FALSE
EIF2AK3	0.566219	0.0592817	FALSE
EIF2AK4	0.514313	0.344241	FALSE
EIF2B1	0.687615	0.546409	TRUE
EIF2B2	0.629253	0.206098	TRUE
EIF2B3	0.275411	0.487437	TRUE
EIF2B4	0.274535	0.116339	TRUE
EIF2B5	0.710952	0.296072	TRUE
EIF2D	0.410684	0.474774	FALSE
EIF2S1	0.62722	0.67296	TRUE
EIF2S2	0.208265	0.360569	TRUE
EIF3B	0.706559	0.341034	TRUE
EIF3D	0.495716	0.121522	TRUE
EIF3E	0.498975	0.0821138	TRUE
EIF3F	0.587021	0.33523	TRUE
EIF3G	0.75963	0.413663	TRUE
EIF3H	0.598975	0.151612	TRUE
EIF3I	0.653184	-0.00155827	TRUE
[truncated: 5,710 more rows]

## Sheet: S2E.HNSC.corr.table
S2E. Spearman's DNA-RNA Corr and RNA-Pro Corr for each gene in HNSC
gene	DNA-RNA Corr	RNA-Pro Corr	CORUM complex
A1BG	0.107098	0.0628395	FALSE
A1CF	0.502275	0.272727	FALSE
A2M	-0.0752787	0.172049	TRUE
A2ML1	0.147892	0.902519	FALSE
A4GALT	0.576921	0.804348	FALSE
AAAS	0.564207	0.176583	FALSE
AACS	0.243068	0.72871	FALSE
AADAC	0.300504	0.358762	FALSE
AADAT	0.0530863	-0.257143	FALSE
AAGAB	0.724849	0.64611	FALSE
AAK1	0.282485	0.626667	FALSE
AAMDC	0.571678	0.395815	FALSE
AAMP	0.694512	0.707032	FALSE
AAR2	0.775882	0.445135	FALSE
AARS	0.471368	0.763259	FALSE
AARS2	0.65806	0.578012	FALSE
AARSD1	0.452365	0.571228	FALSE
AASDH	0.655275	0.154721	FALSE
AASDHPPT	0.788599	0.809545	FALSE
AASS	0.389697	0.827087	FALSE
AATF	0.487827	0.214983	FALSE
ABAT	0.234512	0.805947	FALSE
ABCA1	0.310303	0.131205	FALSE
ABCA12	0.252607	0.852002	FALSE
ABCA2	0.00029061	-0.24485	FALSE
ABCA3	-0.120517	0.320949	FALSE
ABCA5	0.415939	-0.386364	FALSE
ABCA6	-0.16479	0.314558	FALSE
ABCA7	0.31357	-0.420316	FALSE
ABCA8	0.0708837	0.70175	FALSE
ABCB1	-0.0447881	0.00521272	TRUE
ABCB10	0.665723	0.342252	FALSE
ABCB6	0.0428998	0.789786	FALSE
ABCB7	0.492936	0.554119	FALSE
ABCB8	0.569601	0.345558	FALSE
ABCC10	0.644074	0.286114	FALSE
ABCC2	0.233552	-0.147821	FALSE
ABCC3	0.07824	0.473525	FALSE
ABCC4	0.380127	-0.0478866	FALSE
ABCC5	0.749729	0.757769	FALSE
ABCC9	0.145237	0.00091116	TRUE
ABCD1	0.209377	0.664325	FALSE
ABCD3	0.572492	0.461867	FALSE
ABCD4	0.665928	0.102163	FALSE
ABCE1	0.566173	0.639219	FALSE
ABCF2	0.703302	0.738532	FALSE
ABCF3	0.795474	0.725915	FALSE
ABCG1	0.445525	0.530145	FALSE
ABCG2	0.348513	0.290091	FALSE
ABCG4	0.192475	-0.3	FALSE
ABHD10	0.696728	0.481173	FALSE
ABHD11	0.527983	0.575466	FALSE
ABHD12	0.644755	0.566803	FALSE
ABHD13	0.665894	0.255154	FALSE
ABHD14A	0.376212	0.527273	FALSE
ABHD14B	0.265314	0.530249	FALSE
ABHD17A	0.608955	0.253607	FALSE
ABHD17B	0.593446	0.560184	FALSE
ABHD17C	0.411302	0.280387	FALSE
ABHD2	0.368608	0.118798	FALSE
ABHD3	0.57484	0.40662	FALSE
ABHD4	0.410439	0.695747	FALSE
ABHD5	0.20394	0.356373	FALSE
ABHD6	0.141867	0.659775	FALSE
ABI1	0.633028	0.492177	TRUE
ABI2	0.523738	0.666391	FALSE
ABI3	-0.399533	0.758552	TRUE
ABI3BP	0.0524462	0.811941	FALSE
ABL1	0.263444	0.25257	TRUE
ABL2	0.222399	0.287388	FALSE
ABLIM1	0.344122	0.604487	FALSE
ABLIM2	0.261303	0.723894	FALSE
ABLIM3	0.246956	0.725323	FALSE
ABO	0.437994	0.282435	FALSE
ABR	0.422457	0.760921	FALSE
ABRACL	0.473167	0.553278	FALSE
ABT1	0.670697	0.182512	FALSE
ABTB1	0.108185	0.0850317	FALSE
ABTB2	0.312115	0.258155	FALSE
ACAA1	0.341349	0.494276	FALSE
ACAA2	0.23453	0.622649	FALSE
ACACA	0.545737	0.727467	FALSE
ACACB	0.0337706	0.0588586	FALSE
ACAD10	0.590277	0.43771	FALSE
ACAD11	0.596126	0.146628	FALSE
ACAD8	0.822836	0.618254	TRUE
ACAD9	0.752523	0.618059	FALSE
ACADL	0.013882	0	FALSE
ACADM	0.522692	0.623285	FALSE
ACADS	0.111312	0.398079	FALSE
ACADSB	0.0030898	0.71214	FALSE
ACADVL	0.541779	0.586009	FALSE
ACAN	-0.0122747	0.197886	FALSE
ACAP1	0.135558	0.832757	TRUE
ACAP2	0.754541	0.877721	FALSE
ACAP3	0.465054	0.378329	FALSE
ACAT1	0.691389	0.616825	FALSE
ACAT2	0.252548	0.664925	FALSE
ACBD3	0.415213	0.380662	FALSE
ACBD5	0.68692	0.74293	FALSE
ACBD6	0.882473	0.568613	FALSE
ACBD7	-0.0316123	0.43465	FALSE
ACD	0.581057	0.00556821	TRUE
ACE	0.0244838	0.676277	FALSE
ACHE	0.178936	0.457437	FALSE
ACIN1	0.63394	0.408684	TRUE
ACKR1	-0.187762	0.616627	FALSE
ACKR3	0.229773	0.896783	FALSE
ACLY	0.472446	0.755278	FALSE
ACO1	0.526863	0.486061	FALSE
ACO2	0.640013	0.531741	FALSE
ACOT11	0.451001	0.893114	FALSE
ACOT13	0.400222	0.352317	FALSE
ACOT2	0.56562	0.509236	FALSE
ACOT7	0.564538	0.878022	FALSE
ACOT8	0.587525	0.555243	FALSE
ACOT9	0.540009	0.707508	FALSE
ACOX1	0.4175	0.489153	FALSE
ACOX2	0.390696	0.186789	FALSE
ACOX3	0.716549	0.681796	FALSE
ACP1	0.679819	0.3325	FALSE
ACP2	0.465638	0.686948	FALSE
ACP5	0.147683	0.754546	FALSE
ACP6	0.563695	0.327236	FALSE
ACP7	-0.0146616	0.80589	FALSE
ACPP	0.436536	0.883599	FALSE
ACSF2	-0.312916	0.657417	FALSE
ACSF3	0.643227	0.611377	FALSE
ACSL1	0.286582	0.72448	FALSE
ACSL3	0.374537	0.708305	FALSE
ACSL4	0.353736	0.774182	FALSE
ACSL5	0.421819	0.853268	FALSE
ACSL6	0.295802	0.9	FALSE
ACSM3	-0.0069464	0.468641	FALSE
ACSM5	-0.139611	0.6	FALSE
ACSS1	0.326964	0.850797	FALSE
ACSS2	0.350991	0.778817	FALSE
ACSS3	-0.184369	0.662046	FALSE
ACTA1	-0.114715	0.807337	FALSE
ACTA2	-0.165404	0.380362	TRUE
ACTB	0.234114	-0.0022	TRUE
ACTBL2	0.255603	0.264862	FALSE
ACTC1	0.182679	0.732592	FALSE
ACTG1	0.427355	-0.0626864	TRUE
ACTG2	0.038621	0.763884	TRUE
ACTL6A	0.799394	0.700776	TRUE
ACTL8	0.0979003	0.414588	FALSE
ACTN1	0.583203	0.81899	TRUE
ACTN2	-0.0930596	0.75903	FALSE
ACTN3	0.133997	0.347474	FALSE
ACTN4	0.567047	0.539754	TRUE
ACTR10	0.690389	0.345757	FALSE
ACTR1A	0.64202	0.589935	FALSE
ACTR1B	0.542281	0.399146	FALSE
ACTR2	0.372303	0.216521	TRUE
ACTR3	0.534325	0.239988	TRUE
ACTR3B	0.506692	0.219478	FALSE
ACTR5	0.473746	0.518601	TRUE
ACTR6	0.513144	0.2785	TRUE
ACTR8	0.400607	0.25121	TRUE
ACTRT1	0.00464187	-0.102631	FALSE
ACVR1	0.277036	0.652186	FALSE
ACVR2A	0.623326	0.391303	FALSE
ACVRL1	-0.12155	0.027972	FALSE
ACY1	-0.106909	0.623605	FALSE
ACY3	0.250058	0.445511	FALSE
ACYP1	0.394009	0.60004	FALSE
ACYP2	0.198175	0.334282	FALSE
ADA	0.190511	0.680239	TRUE
ADAL	0.536439	0.332446	FALSE
ADAM10	0.622191	0.598986	FALSE
ADAM12	-0.0524141	0.293706	TRUE
ADAM15	0.0373365	0.736429	TRUE
ADAM17	0.580039	0.601038	FALSE
ADAM22	0.162328	0.322296	TRUE
ADAM28	0.327065	0.611612	FALSE
ADAM8	0.325981	0.607003	TRUE
ADAM9	0.69184	0.780463	TRUE
ADAMDEC1	-0.0680713	0.267292	FALSE
ADAMTS1	0.298283	0.235484	FALSE
ADAMTS12	-0.078723	0.553656	FALSE
ADAMTS13	0.210264	0.0909091	FALSE
ADAMTS14	-0.0017125	0.720168	FALSE
ADAMTS15	0.1494	0.38298	FALSE
ADAMTS16	0.0146705	0.807947	FALSE
ADAMTS2	0.0934969	0.570099	FALSE
ADAMTS4	-0.102903	0.609479	FALSE
ADAMTS7	0.00327487	0.485027	FALSE
ADAMTSL1	0.0389705	0.445588	FALSE
ADAMTSL2	-0.167774	0.364092	FALSE
ADAMTSL3	0.0558855	-0.257143	FALSE
ADAMTSL4	-0.32848	0.426172	FALSE
ADAMTSL5	0.0560404	0.224723	FALSE
ADAP1	0.474288	0.489334	FALSE
ADAP2	-0.301993	0.564434	FALSE
ADAR	0.388201	0.677226	TRUE
ADARB1	0.354469	0.618603	FALSE
ADAT1	0.547478	0.264281	FALSE
ADAT2	0.426479	0.344721	FALSE
ADAT3	0.404482	0.236948	FALSE
ADCK1	0.595411	0.162352	FALSE
ADCK5	0.594	0.325031	FALSE
ADCY3	0.415032	0.261577	FALSE
ADCY4	-0.0042717	-0.178571	FALSE
ADCY6	0.248029	0.337096	FALSE
ADCY7	0.512488	0.324986	FALSE
ADCY9	0.268079	0.0721344	FALSE
ADD1	0.801756	0.238274	FALSE
ADD2	0.526835	0.538827	TRUE
ADD3	-0.0178694	0.768538	FALSE
ADGB	-0.0799262	0.199652	FALSE
ADGRA2	-0.112575	0.343936	FALSE
ADGRA3	0.498483	0.828571	FALSE
ADGRE2	-0.095404	0.789392	FALSE
ADGRE3	-0.137347	0.572209	FALSE
ADGRE5	0.172768	0.716124	FALSE
ADGRF1	0.0203826	0.386391	FALSE
ADGRF4	-0.114995	0.119175	FALSE
ADGRF5	0.248101	0.350691	FALSE
ADGRG1	0.3482	0.714256	TRUE
ADGRG2	0.242348	0.2	FALSE
ADGRG3	0.199331	0.587192	FALSE
ADGRG5	-0.0809677	0.645602	FALSE
ADGRG6	0.428757	0.443591	FALSE
ADGRL1	0.352975	0.151976	FALSE
ADGRL2	0.0874569	0.78146	FALSE
ADGRL4	0.213664	0.485877	FALSE
ADGRV1	-0.0109466	-0.0274504	FALSE
ADH1A	-0.146379	0.0675539	FALSE
ADH1B	-0.0406865	0.66189	FALSE
ADH1C	-0.082606	0.573586	FALSE
ADH4	-0.0612729	0.0662224	FALSE
ADH5	0.384197	0.611858	FALSE
ADH6	-0.0889667	0.542857	FALSE
ADH7	-0.211225	0.778651	FALSE
ADHFE1	-0.0307348	0.315547	FALSE
ADI1	0.531241	0.6587	FALSE
ADIPOQ	-0.105734	0.423667	TRUE
ADIPOR1	0.165709	0.215415	FALSE
ADIRF	0.32104	0.798166	FALSE
ADK	0.535857	0.814142	FALSE
ADM	0.269106	0.72259	FALSE
ADNP	0.528023	0.592057	FALSE
ADNP2	0.457237	0.471048	FALSE
ADO	0.64315	0.554343	FALSE
ADPGK	0.475981	0.596375	FALSE
ADPRH	0.0838472	0.646621	FALSE
ADPRHL1	0.360346	0.536136	FALSE
ADPRHL2	0.639769	0.456154	FALSE
ADPRM	0.509803	0.885714	FALSE
ADRA2A	0.00243254	0.477193	TRUE
ADRM1	0.632906	0.437471	FALSE
ADSL	0.514826	0.587576	FALSE
ADSS	0.736578	0.804915	FALSE
ADSSL1	0.454805	0.500596	FALSE
AEBP1	-0.118604	0.810558	FALSE
AEBP2	0.825227	0.307808	TRUE
AFAP1	0.41798	0.774336	FALSE
AFAP1L1	0.389622	0.755475	FALSE
AFAP1L2	0.482257	0.931603	FALSE
AFF1	0.524151	-0.0713951	TRUE
AFF4	0.727572	0.0224044	TRUE
AFG3L2	0.741837	0.67101	TRUE
AFM	-0.0088055	-0.0209557	FALSE
AFMID	0.423911	0.0775373	FALSE
AFTPH	0.57125	0.490876	FALSE
AGA	0.379934	0.591384	FALSE
AGAP1	0.269641	0.299641	FALSE
AGAP2	-0.0089825	0.500067	FALSE
AGAP3	0.56542	0.487679	FALSE
AGBL1	0.120092	0.386429	FALSE
AGFG1	0.496279	0.686598	FALSE
AGFG2	0.532314	0.78471	FALSE
AGGF1	0.649743	0.158636	FALSE
AGK	0.568507	0.431565	FALSE
AGL	0.289657	0.622603	FALSE
AGMAT	0.26039	0.51028	FALSE
AGO1	0.265395	0.2674	FALSE
AGO2	0.506209	0.382706	TRUE
AGO3	0.535125	0.452564	FALSE
AGPAT2	0.531017	0.569872	FALSE
AGPAT3	0.518997	0.458726	FALSE
AGPAT4	0.33736	0.620399	FALSE
AGPAT5	0.492912	0.645343	FALSE
AGPS	0.435761	0.697063	TRUE
AGR2	0.160557	0.646173	FALSE
AGR3	0.148192	0.611182	FALSE
AGRN	0.462461	0.511183	FALSE
AGT	0.00876313	0.250891	TRUE
AGTPBP1	0.407853	0.49004	FALSE
AGTRAP	0.595335	0.496997	FALSE
AGXT	0.116359	0.287072	FALSE
AHCTF1	0.878021	0.620635	FALSE
AHCY	0.475219	0.784357	FALSE
AHCYL1	0.539887	0.243611	FALSE
AHCYL2	0.390205	0.822424	FALSE
AHDC1	0.129272	0.448726	FALSE
AHNAK	0.463345	0.54525	TRUE
AHNAK2	0.632028	0.815158	FALSE
AHR	0.582677	0.75625	TRUE
AHSA1	0.654899	0.751951	FALSE
AHSG	0.404507	-0.140183	FALSE
AHSP	0.0130295	0.0934798	FALSE
AIDA	0.549282	0.431255	FALSE
AIF1L	0.223048	0.898222	FALSE
AIFM1	0.454945	0.270068	TRUE
AIFM2	0.294843	0.413317	FALSE
AIG1	0.448962	0.576501	FALSE
AIM2	-0.27244	0.731424	FALSE
AIMP1	0.605585	0.359363	TRUE
AIMP2	0.537052	0.613331	TRUE
AIP	0.7215	0.753885	FALSE
AJAP1	0.368413	1	FALSE
AJUBA	0.475188	0.736015	TRUE
AK1	0.409512	0.61454	FALSE
AK2	0.694854	0.381755	FALSE
AK3	0.797991	0.679012	FALSE
AK4	0.440461	0.842749	FALSE
AK5	0.274423	0.709345	FALSE
AKAP1	0.664855	0.832055	TRUE
AKAP10	0.804352	0.569524	FALSE
AKAP11	0.571879	0.246642	FALSE
AKAP12	0.0854211	0.653838	FALSE
AKAP13	0.443251	0.685652	TRUE
AKAP5	0.184233	-0.0857143	TRUE
AKAP6	0.366749	0.14544	FALSE
AKAP7	0.215601	0.128937	FALSE
AKAP8	0.803005	0.622479	FALSE
AKAP8L	0.726582	0.487177	TRUE
AKAP9	0.604436	0.746938	TRUE
AKNA	0.0765255	0.280921	FALSE
AKR1A1	0.413311	0.450881	FALSE
AKR1B1	0.389758	0.638664	FALSE
AKR1B10	0.522491	0.946623	FALSE
AKR1B15	0.151964	-0.4	FALSE
AKR1C1	0.148759	0.781462	FALSE
AKR1C2	0.150274	0.861014	FALSE
AKR1C3	0.229593	0.742789	FALSE
AKR1C4	0.0671319	0.176192	FALSE
AKR7A2	0.627822	0.392523	FALSE
AKR7A3	0.0934586	0.623181	FALSE
AKT1	0.620887	0.414313	TRUE
AKT1S1	0.501668	0.538364	FALSE
AKT2	0.715293	0.457927	TRUE
AKT3	0.452907	0.816859	FALSE
AKTIP	0.664857	0.531277	TRUE
ALAD	0.473391	0.524111	FALSE
ALAS1	0.196126	0.313345	FALSE
ALB	0.245151	0.237319	FALSE
ALCAM	0.27602	0.89362	FALSE
ALDH16A1	0.41849	0.726194	FALSE
ALDH18A1	0.253602	0.537828	FALSE
ALDH1A1	0.203138	0.80488	FALSE
ALDH1A2	0.122481	0.50977	FALSE
ALDH1A3	0.18436	0.746517	FALSE
ALDH1B1	0.344598	0.602499	FALSE
ALDH1L1	0.10182	0.734359	FALSE
ALDH1L2	-0.0182907	0.727544	FALSE
ALDH2	0.295475	0.661625	FALSE
ALDH3A1	0.257718	0.708345	FALSE
ALDH3A2	0.543476	0.81769	FALSE
ALDH3B1	0.101	0.439463	FALSE
ALDH4A1	0.518832	0.693107	FALSE
ALDH5A1	0.173791	0.714837	FALSE
ALDH6A1	0.022896	0.629159	FALSE
ALDH7A1	0.452789	0.865802	FALSE
ALDH8A1	0.306768	0.0350184	FALSE
ALDH9A1	0.328053	0.706089	FALSE
ALDOA	0.324798	0.578431	FALSE
ALDOB	0.0745338	-0.21214	FALSE
ALDOC	0.393979	0.886016	FALSE
ALG1	0.454092	0.257738	FALSE
ALG10B	0.0671591	0.0446727	FALSE
ALG11	0.767309	0.491511	FALSE
ALG12	0.6122	0.343887	FALSE
ALG13	0.465788	0.145859	FALSE
ALG14	0.6169	0.393436	FALSE
ALG2	0.700241	0.547184	FALSE
ALG3	0.635722	0.480222	FALSE
ALG5	0.754237	0.470485	FALSE
ALG6	0.544003	0.217334	FALSE
ALG8	0.829353	0.573748	FALSE
ALG9	0.739765	0.531957	FALSE
ALKBH1	0.814124	0.416698	FALSE
ALKBH2	0.453168	0.309053	FALSE
ALKBH3	0.638092	0.352416	FALSE
ALKBH4	0.755364	0.531118	FALSE
ALKBH5	0.664001	0.439628	FALSE
ALKBH6	0.587291	0.448791	FALSE
ALKBH7	0.507747	0.371476	FALSE
ALKBH8	0.762036	0.459463	FALSE
ALMS1	0.547014	-0.195262	FALSE
ALOX12	0.173363	0.64275	FALSE
ALOX12B	0.190088	0.546644	FALSE
ALOX15	-0.0571278	0.684796	FALSE
ALOX15B	0.0472238	0.766725	FALSE
ALOX5	-0.0608269	0.748447	FALSE
ALOX5AP	0.239019	0.571167	FALSE
ALOXE3	0.162367	0.8	FALSE
ALPK1	0.491123	0.501925	FALSE
ALPK3	0.209794	0.562661	FALSE
ALPL	0.167675	0.744624	FALSE
ALS2	0.781056	0.177836	FALSE
ALS2CL	0.0901356	0.565051	FALSE
ALYREF	0.567159	0.242886	TRUE
AMACR	0.531511	0.578311	FALSE
AMBP	0.0641208	-0.0664021	FALSE
AMBRA1	0.808193	0.226325	FALSE
AMD1	0.283455	0.497227	FALSE
AMDHD2	0.237918	0.524263	FALSE
AMER1	0.307952	0.660606	FALSE
AMFR	0.735294	0.275864	TRUE
AMIGO2	-0.100344	0.530963	FALSE
AMMECR1	0.190411	0.440642	FALSE
AMN1	0.471459	0.375582	FALSE
AMOT	0.138295	0.517459	TRUE
AMOTL1	0.60109	0.666423	TRUE
AMOTL2	0.283919	0.3998	TRUE
AMPD1	-0.0241248	0.549245	FALSE
AMPD2	0.256448	0.613205	FALSE
AMPD3	0.555426	0.669319	FALSE
AMPH	-0.0343291	0.534075	FALSE
AMT	0.215819	0.224756	FALSE
AMY1B	-0.0511339	0.221306	FALSE
AMZ2	0.425389	0.263965	FALSE
ANAPC1	0.743353	0.316451	TRUE
ANAPC10	0.65137	0.149942	TRUE
ANAPC11	0.375619	0.0828674	FALSE
ANAPC13	0.515999	0.236669	FALSE
ANAPC15	0.797371	0.307692	FALSE
ANAPC16	0.43451	0.215299	FALSE
ANAPC2	0.723963	0.26821	TRUE
ANAPC4	0.676527	0.268015	TRUE
ANAPC5	0.758177	0.0794143	TRUE
ANAPC7	0.551668	0.366655	TRUE
ANG	0.221404	0.198556	TRUE
ANGEL1	0.62575	0.381895	FALSE
ANGEL2	0.693897	0.399053	FALSE
ANGPT2	0.0943122	0.372459	FALSE
ANGPTL1	-0.143781	0.214286	FALSE
ANGPTL2	-0.158364	0.75841	FALSE
ANGPTL4	0.33949	0.728951	TRUE
ANGPTL7	0.299809	0.200165	FALSE
ANK1	0.110099	0.142509	FALSE
ANK2	0.15467	0.868432	FALSE
ANK3	0.405287	0.86822	TRUE
ANKFY1	0.651372	0.65227	FALSE
ANKHD1	0.501552	0.0734728	FALSE
ANKIB1	0.752077	0.568731	FALSE
ANKLE2	0.574848	0.77156	FALSE
ANKMY2	0.555791	0.596159	FALSE
ANKRA2	0.353922	0.485714	TRUE
ANKRD1	0.144826	0.804028	FALSE
ANKRD10	0.379907	0.41726	FALSE
ANKRD11	0.420262	0.143087	TRUE
ANKRD12	0.412586	-0.0780821	FALSE
ANKRD13A	0.204678	0.825948	FALSE
ANKRD13D	0.677512	0.268643	FALSE
ANKRD16	0.527469	0.375009	FALSE
ANKRD17	0.812695	0.568451	FALSE
ANKRD2	-0.135134	0.778641	FALSE
ANKRD22	0.264638	0.798122	FALSE
ANKRD23	0.223344	0.820779	FALSE
ANKRD26	0.247197	-0.0297936	FALSE
ANKRD27	0.738216	0.592658	FALSE
ANKRD28	0.511451	0.49819	TRUE
ANKRD29	0.097767	-0.0909091	FALSE
ANKRD35	-0.118366	0.844673	FALSE
ANKRD39	0.503786	0.240189	FALSE
ANKRD40	0.553043	0.402745	FALSE
ANKRD44	-0.0972724	0.883374	FALSE
ANKRD46	0.608565	0.118068	FALSE
ANKRD49	0.787532	0.452462	FALSE
ANKRD50	0.439126	0.675832	FALSE
ANKRD52	0.36211	0.118515	FALSE
ANKRD54	0.616096	0.571823	FALSE
ANKRD62	0.0833612	-0.297095	FALSE
ANKRD9	0.5344	0.485714	FALSE
ANKS1A	0.505249	0.627704	FALSE
ANKS1B	0.340741	-0.291632	FALSE
ANKS3	0.576547	0.182831	FALSE
ANKS6	0.350191	0.371888	TRUE
ANKZF1	0.637822	0.442584	FALSE
ANLN	0.616227	0.851214	FALSE
ANO1	0.778051	0.914242	FALSE
ANO10	0.298052	0.630437	FALSE
ANO5	0.0152923	0.328489	FALSE
ANO6	0.11951	0.763603	FALSE
ANO8	0.151644	0.394134	FALSE
ANO9	0.252245	0.5	FALSE
ANOS1	0.362396	0.587862	TRUE
ANP32A	0.535153	0.483699	TRUE
ANP32B	0.585059	0.632163	TRUE
ANP32E	0.503046	0.552339	FALSE
ANPEP	-0.028301	0.767897	FALSE
ANTXR1	0.126537	0.759154	FALSE
ANTXR2	0.35539	0.700137	FALSE
ANXA1	0.324317	0.868036	FALSE
ANXA11	0.411764	0.7385	FALSE
ANXA13	0.0466899	-0.0335836	FALSE
ANXA2	0.451337	0.659519	TRUE
ANXA3	0.296021	0.75357	FALSE
ANXA4	0.20574	0.673928	FALSE
ANXA5	0.539954	0.487172	FALSE
ANXA6	0.262392	0.725926	TRUE
ANXA7	0.730713	0.557338	TRUE
ANXA8	0.300915	0.89462	FALSE
ANXA8L1	0.387477	0.816772	FALSE
ANXA9	-0.10047	0.732249	FALSE
AOAH	-0.273955	0.785482	FALSE
AOC1	0.365297	0.695037	FALSE
AOC3	-0.0203839	0.608606	FALSE
AOX1	-0.078346	0.906758	FALSE
AP1AR	0.471972	0.459102	TRUE
AP1B1	0.620604	0.402869	TRUE
AP1G1	0.804339	0.510994	TRUE
AP1G2	0.737618	0.486634	TRUE
AP1M1	0.461902	0.441686	TRUE
AP1M2	0.559365	0.625213	TRUE
AP1S1	0.5568	0.37247	TRUE
AP1S2	0.46612	0.552734	TRUE
AP1S3	0.341792	0.725827	TRUE
AP2A1	0.307337	0.286821	TRUE
AP2A2	0.668539	0.559386	FALSE
AP2B1	0.166646	0.251332	FALSE
AP2M1	0.499735	0.106687	FALSE
AP2S1	0.383572	0.183808	FALSE
AP3B1	0.798996	0.494716	TRUE
AP3B2	0.0721581	0.400445	TRUE
AP3D1	0.525082	0.29158	TRUE
AP3M1	0.568329	0.199781	TRUE
AP3M2	0.742067	0.482061	TRUE
AP3S1	0.5999	0.569913	TRUE
AP3S2	0.61991	0.374154	TRUE
AP4B1	0.701156	0.173903	TRUE
AP4E1	0.451587	0.736677	TRUE
AP4M1	0.540094	0.264537	TRUE
AP4S1	0.748615	0.42154	TRUE
AP5B1	0.352746	0.180065	TRUE
AP5M1	0.667652	0.104965	TRUE
AP5S1	0.624066	0.275329	TRUE
AP5Z1	0.471864	0.366106	TRUE
APAF1	0.541331	0.593578	TRUE
APBA1	0.0295548	0.00415449	TRUE
APBA2	-0.0068925	-0.0808824	FALSE
APBB1	0.0163967	0.387245	TRUE
APBB1IP	0.0205615	0.860187	TRUE
APBB2	0.601215	0.771896	FALSE
APC	0.60635	0.14927	TRUE
APCDD1	0.266361	0.517369	FALSE
APCS	0.0942634	0.0232192	FALSE
APEH	0.325193	0.586078	FALSE
APEX1	0.751187	0.586807	TRUE
APEX2	0.616963	0.445499	FALSE
APH1A	0.622327	0.00677966	TRUE
API5	0.830742	0.605066	TRUE
APIP	0.661787	0.608922	FALSE
APLF	-0.0150881	0.31599	FALSE
APLP2	0.595564	0.706203	FALSE
APMAP	0.672156	0.655511	FALSE
APOA1	0.226486	0.114817	TRUE
APOA2	0.0399234	0.0817663	FALSE
APOA4	0.285696	0.0440388	FALSE
APOA5	-0.0632736	0.481471	FALSE
APOB	-0.0751099	0.0878842	FALSE
APOBEC2	0.409075	0.747483	FALSE
APOBEC3B	0.481989	0.67362	FALSE
APOBEC3C	0.473785	0.65607	FALSE
APOBEC3D	0.0402487	0.161765	FALSE
APOBEC3F	0.210754	0.481893	FALSE
APOBEC3G	0.0302864	0.929565	FALSE
APOBR	0.028747	0.790291	FALSE
APOC1	0.150691	-0.209747	FALSE
APOC2	0.141315	0.00073055	FALSE
APOC3	-0.0527626	-0.110226	FALSE
APOC4	0.0726847	-0.0333127	FALSE
APOD	-0.0256681	0.468772	FALSE
APOE	0.16876	0.463022	FALSE
APOF	0.278147	-0.0196453	FALSE
APOH	0.0274961	-0.0255458	FALSE
APOL2	0.289947	0.924527	FALSE
APOL3	-0.0278954	0.905039	FALSE
APOL4	0.0573512	0.198547	FALSE
APOL6	0.0127888	0.642724	FALSE
APOO	0.490558	0.239604	TRUE
APOOL	0.399859	0.155413	TRUE
APOPT1	0.800713	-0.388443	FALSE
APP	0.506931	0.756387	TRUE
APPBP2	0.62771	0.357459	FALSE
APPL1	0.461304	0.742063	TRUE
APPL2	0.377137	0.548401	FALSE
APRT	0.687047	0.58187	FALSE
APTX	0.772937	0.793395	FALSE
AQP1	-0.21283	0.778511	TRUE
AQP3	0.33211	0.707257	FALSE
AQP4	-0.0080248	0.406838	TRUE
AQP5	0.159081	0.624572	FALSE
AQR	0.734309	0.135148	TRUE
ARAF	0.679137	0.478193	TRUE
ARAP1	0.77302	0.717327	FALSE
ARAP2	0.534918	0.64595	FALSE
ARAP3	0.150432	0.593287	FALSE
ARCN1	0.879187	0.610935	FALSE
ARF1	0.461952	0.224588	TRUE
ARF3	0.649643	0.367918	FALSE
ARF4	0.526018	0.450061	FALSE
ARF5	0.794183	0.465878	FALSE
ARF6	0.669329	0.612013	FALSE
ARFGAP1	0.647189	0.75029	FALSE
ARFGAP2	0.762063	0.708188	FALSE
ARFGAP3	0.544476	0.683818	FALSE
ARFGEF1	0.650541	0.769207	FALSE
ARFGEF2	0.69909	0.781389	FALSE
ARFGEF3	0.291917	0.798084	FALSE
ARFIP1	0.788279	0.750711	FALSE
ARFIP2	0.695587	0.816622	TRUE
ARFRP1	0.628817	0.612487	FALSE
ARG1	-0.0178159	0.465919	FALSE
ARG2	0.299852	0.744666	FALSE
ARGLU1	0.787099	0.250697	FALSE
ARHGAP1	0.526689	0.594202	FALSE
ARHGAP10	0.598805	0.837685	TRUE
ARHGAP11A	0.227922	-0.28839	FALSE
ARHGAP12	0.593305	0.611121	FALSE
ARHGAP15	-0.352137	0.805929	FALSE
ARHGAP17	0.384261	0.606815	TRUE
ARHGAP18	0.0597909	0.856273	FALSE
ARHGAP19	0.409558	0.441415	FALSE
ARHGAP21	0.377351	0.767665	FALSE
ARHGAP23	0.221653	0.21451	FALSE
ARHGAP24	0.0743176	0.389097	FALSE
ARHGAP25	-0.35007	0.827838	FALSE
ARHGAP26	0.271096	0.715609	FALSE
ARHGAP28	0.0767695	0.718182	FALSE
ARHGAP29	0.387498	0.364325	FALSE
ARHGAP30	-0.2546	0.818648	FALSE
ARHGAP31	0.030466	0.684567	FALSE
ARHGAP32	0.498459	0.738518	FALSE
ARHGAP35	0.505072	0.591254	FALSE
ARHGAP39	0.583339	0.13641	FALSE
ARHGAP4	-0.183254	0.837917	FALSE
ARHGAP42	0.398042	0.102035	FALSE
ARHGAP5	0.716838	0.753191	FALSE
ARHGAP6	0.0197022	0.470415	FALSE
ARHGAP9	-0.140285	0.751115	FALSE
ARHGDIA	0.494334	0.388454	FALSE
ARHGDIB	-0.209043	0.763797	FALSE
ARHGEF1	0.0812624	0.742764	TRUE
ARHGEF10	0.350183	0.799915	FALSE
ARHGEF10L	0.281881	0.818739	FALSE
ARHGEF11	0.619706	0.558984	FALSE
ARHGEF12	0.861822	0.869071	FALSE
ARHGEF15	0.143386	0.0525833	FALSE
ARHGEF16	0.287726	0.834268	FALSE
ARHGEF17	0.242774	0.650721	FALSE
ARHGEF18	0.503503	0.691228	TRUE
ARHGEF19	0.342653	0.431093	FALSE
ARHGEF2	0.355995	0.740566	TRUE
ARHGEF25	0.0969469	-0.115152	TRUE
ARHGEF26	0.544534	0.533144	FALSE
ARHGEF28	0.117361	0.650904	FALSE
ARHGEF3	0.597168	0.477542	FALSE
ARHGEF35	0.612821	0.389153	FALSE
ARHGEF37	0.373355	0.839175	FALSE
ARHGEF39	0.509712	0.771429	FALSE
ARHGEF4	0.339803	0.603201	FALSE
ARHGEF40	0.0401561	0.672431	FALSE
ARHGEF5	0.539515	0.769406	FALSE
ARHGEF6	-0.121539	0.826128	TRUE
ARHGEF7	0.718485	0.724173	TRUE
ARID1A	-0.0250569	0.140237	TRUE
ARID1B	0.38772	0.533253	TRUE
ARID2	0.648206	0.69052	TRUE
ARID3A	0.371011	0.554449	FALSE
ARID3B	0.434624	0.220467	FALSE
ARID4A	0.599603	0.339016	TRUE
ARID4B	0.690311	0.576479	TRUE
ARID5B	0.561945	0.359729	FALSE
ARIH1	0.720159	0.55249	FALSE
ARIH2	0.616593	0.55385	FALSE
ARL1	0.50386	0.228722	TRUE
ARL11	0.563665	0.380776	FALSE
ARL13A	0.393376	0.0486254	FALSE
ARL13B	0.67176	0.7	FALSE
ARL14EP	0.637185	0.22083	FALSE
ARL15	0.234154	0.567154	FALSE
ARL16	0.458027	-0.05	FALSE
ARL2	0.499788	0.209392	TRUE
ARL2BP	0.673571	0.528114	FALSE
ARL3	0.384136	0.608426	FALSE
ARL4C	0.167604	0.456977	FALSE
ARL5A	0.349844	-0.0496721	FALSE
ARL5B	0.588551	0.528893	FALSE
ARL6	0.497783	0.533739	FALSE
ARL6IP1	0.389083	0.253727	FALSE
ARL6IP4	0.525726	0.169883	FALSE
ARL6IP5	0.625909	0.786326	FALSE
ARL6IP6	0.710546	0.163115	FALSE
ARL8A	0.555259	0.371887	FALSE
ARL8B	0.251798	0.354869	FALSE
ARMC1	0.653807	0.271441	FALSE
ARMC10	0.792772	0.635032	FALSE
ARMC5	0.327941	-0.0405156	FALSE
ARMC6	0.641904	0.666934	FALSE
ARMC7	0.574661	0.149304	FALSE
ARMC8	0.750362	0.676828	TRUE
ARMC9	0.247548	0.668185	FALSE
ARMCX1	0.0871121	0.552485	FALSE
ARMCX2	0.0980323	0.613811	FALSE
ARMCX3	0.209116	0.800255	FALSE
ARMCX5	0.617629	0.17722	FALSE
ARMCX6	0.298867	0.24871	FALSE
ARMT1	0.58358	0.395425	FALSE
ARNT	0.650964	0.524254	TRUE
ARNTL	0.424312	0.38791	TRUE
ARNTL2	0.31429	0.0964488	FALSE
ARPC1A	0.598556	-0.01966	FALSE
ARPC1B	0.303231	0.44056	TRUE
ARPC2	0.5864	0.254351	TRUE
ARPC3	0.412128	0.134542	TRUE
ARPC4	0.5785	0.350767	TRUE
ARPC5	0.407584	0.265205	TRUE
ARPC5L	0.692778	0.556546	FALSE
ARPIN	0.421952	0.489949	FALSE
ARPP19	0.751197	0.478991	FALSE
ARPP21	0.299729	0.663065	FALSE
ARRB1	0.318618	0.776511	TRUE
ARRB2	0.280096	0.668818	TRUE
ARRDC1	0.57866	0.513693	FALSE
ARSA	0.367695	0.645795	FALSE
ARSB	0.422401	0.635754	FALSE
ARSD	0.209522	0.156567	FALSE
ARSE	0.0423043	0.173817	FALSE
ARSF	-0.105348	0.806716	FALSE
ARSK	0.459988	0.691232	FALSE
ART3	0.0287047	0.501788	FALSE
ARV1	0.588459	0.357024	FALSE
ARVCF	0.464864	0.590618	FALSE
AS3MT	-0.347385	0.559431	FALSE
ASAH1	0.484832	0.604559	TRUE
ASAP1	0.168579	0.419751	TRUE
ASAP2	0.618368	0.7306	FALSE
ASAP3	0.221566	0.67998	FALSE
ASB1	0.627602	0.232679	TRUE
ASB10	-0.0064455	0.364732	FALSE
ASB13	0.606377	0.216556	FALSE
ASB2	0.203352	0.3	TRUE
ASB6	0.689165	0.358492	TRUE
ASB7	0.776904	0.118315	TRUE
ASB9	0.189612	0.249222	TRUE
ASCC1	0.367977	0.176015	TRUE
ASCC2	0.588526	0.400174	TRUE
ASCC3	0.463409	0.780219	TRUE
ASCL2	0.366437	0.105882	FALSE
ASF1A	0.381607	0.660205	TRUE
ASF1B	0.484104	0.581548	TRUE
ASGR2	0.0841881	0.192036	FALSE
ASH1L	0.810937	0.0282036	FALSE
ASH2L	0.766182	0.647925	TRUE
ASL	0.368794	0.753263	FALSE
ASNA1	0.586689	0.356384	FALSE
ASNS	0.545705	0.833713	FALSE
ASNSD1	0.521918	0.117977	FALSE
ASPA	0.16967	0.459577	FALSE
ASPG	0.374739	0.65465	FALSE
ASPH	0.452949	0.69267	FALSE
ASPHD2	0.256163	0.672324	FALSE
ASPM	0.615798	0.256645	FALSE
ASPN	-0.204052	0.658652	FALSE
ASPRV1	-0.323514	0.884881	FALSE
ASPSCR1	0.523923	0.62305	FALSE
ASRGL1	0.114166	0.583649	FALSE
ASS1	0.349844	0.884153	FALSE
ASTE1	0.760263	0.0589004	FALSE
ASXL1	0.593522	0.3	TRUE
ASXL2	0.731084	0.329725	FALSE
ATAD1	0.673221	0.475935	FALSE
ATAD2	0.480136	0.759884	FALSE
ATAD2B	0.728495	0.533569	FALSE
ATAD3A	0.577975	0.625723	FALSE
ATAD3B	0.605954	0.597676	FALSE
ATAD5	0.548107	0.58372	FALSE
ATE1	0.610593	0.619685	FALSE
ATF1	0.421906	-0.0699216	FALSE
ATF2	0.50805	0.356995	TRUE
ATF3	0.0796495	0.380305	FALSE
ATF6	0.410443	0.229337	FALSE
ATF7	0.331403	0.271751	FALSE
ATF7IP	0.301011	0.430187	TRUE
ATG10	0.460078	0.560366	FALSE
ATG101	0.603915	0.353615	TRUE
ATG12	0.634805	0.242456	FALSE
ATG13	0.829196	0.528334	TRUE
ATG14	0.686394	0.350789	TRUE
ATG16L1	0.557837	0.488314	TRUE
ATG2A	0.524518	0.295644	FALSE
ATG2B	0.668733	0.536962	FALSE
ATG3	0.681504	0.530459	FALSE
ATG4A	0.216752	0.366046	FALSE
ATG4B	0.685874	0.633663	FALSE
ATG4C	0.599118	0.350814	FALSE
ATG4D	0.479694	0.0454546	FALSE
ATG5	0.611341	0.16165	FALSE
ATG7	0.608275	0.82873	FALSE
ATG9A	0.695001	0.724604	FALSE
ATIC	0.392839	0.43346	FALSE
ATL1	0.306113	0.83298	TRUE
ATL2	0.511645	0.716316	TRUE
ATL3	0.419796	0.675488	TRUE
ATM	0.543732	0.704254	TRUE
ATN1	0.584639	0.334698	FALSE
ATOX1	0.730352	0.502341	FALSE
ATP10A	-0.0441444	-0.273529	FALSE
ATP10D	0.526131	0.7	FALSE
ATP11A	0.395086	0.0660271	FALSE
ATP11B	0.660575	0.579391	FALSE
ATP11C	0.435158	0.569096	FALSE
ATP12A	-0.0017599	0.608696	FALSE
ATP13A1	0.606397	0.22915	FALSE
ATP13A2	0.399831	0.229253	FALSE
ATP13A3	0.589808	0.631345	FALSE
ATP13A4	0.00641815	0.330646	FALSE
ATP1A1	0.0749877	0.548296	FALSE
ATP1A2	-0.126224	0.749596	FALSE
ATP1A3	0.192055	-0.169915	FALSE
ATP1B1	0.311732	0.589006	TRUE
ATP1B2	0.176454	-0.0113823	FALSE
ATP1B3	0.491184	0.525377	FALSE
ATP1B4	-0.0562966	0.685215	FALSE
ATP2A1	0.0926422	0.626891	TRUE
ATP2A2	0.240694	0.391204	TRUE
ATP2A3	0.0630945	0.675119	FALSE
ATP2B1	0.220445	0.787322	FALSE
ATP2B3	0.192115	0.318874	FALSE
ATP2B4	0.445521	0.683414	FALSE
ATP2C1	0.712748	0.676533	FALSE
ATP2C2	0.38368	0.45798	FALSE
ATP4A	0.505946	0.0314413	TRUE
ATP6AP1	0.569753	0.32294	FALSE
ATP6AP2	0.597111	0.261243	FALSE
ATP6V0A1	0.37738	0.370815	FALSE
ATP6V0A2	0.419273	0.287738	FALSE
ATP6V0A4	0.376641	0.435915	FALSE
ATP6V0C	0.338805	0.278761	TRUE
ATP6V0D1	0.557973	0.483542	TRUE
ATP6V0D2	0.272044	0.642857	FALSE
ATP6V1A	0.610275	0.466427	TRUE
ATP6V1B1	0.416834	0.011872	FALSE
ATP6V1B2	0.601756	0.6513	TRUE
ATP6V1C1	0.644329	0.548638	FALSE
ATP6V1C2	0.0626784	0.671433	FALSE
ATP6V1D	0.554629	0.267788	FALSE
ATP6V1E1	0.556981	0.0750048	FALSE
ATP6V1F	0.777505	0.490504	FALSE
ATP6V1G1	0.584192	0.197346	FALSE
ATP6V1H	0.674326	0.43106	FALSE
ATP7A	0.499854	0.615117	FALSE
ATP8A1	0.149907	0.150998	FALSE
ATP8B1	0.330173	0.784962	FALSE
ATP8B2	0.0554017	-0.7	FALSE
ATP8B4	0.0379737	0.277737	FALSE
ATP9A	0.299779	0.673702	FALSE
ATP9B	0.664494	0.0739047	FALSE
ATPAF1	0.345447	0.506568	FALSE
ATPAF2	0.79035	0.207482	FALSE
ATR	0.772457	0.363333	TRUE
ATRAID	0.627678	0.342956	FALSE
ATRIP	-0.0040107	0.184109	TRUE
ATRN	0.589894	0.162793	FALSE
ATRX	0.557573	0.716592	TRUE
ATXN1	0.313291	0.510633	TRUE
ATXN10	0.630189	0.622755	FALSE
ATXN1L	0.775569	0.425304	FALSE
ATXN2	0.357789	0.17676	FALSE
ATXN2L	0.231309	0.126196	FALSE
ATXN3	0.728694	0.73028	FALSE
ATXN7	0.73497	0.27463	TRUE
ATXN7L2	0.469412	0.148352	TRUE
ATXN7L3	0.449223	-0.0370564	TRUE
ATXN7L3B	0.601038	0.11491	FALSE
AUH	0.550675	0.359862	FALSE
AUP1	0.407105	0.484724	TRUE
AURKA	0.500681	0.644846	TRUE
AURKAIP1	0.672754	0.235601	FALSE
AURKB	0.51715	0.800902	TRUE
AUTS2	0.328842	0.510756	FALSE
AVEN	0.521512	0.505327	FALSE
AVIL	0.198363	0.296319	FALSE
AVL9	0.730004	0.504932	FALSE
AXIN1	0.505058	0.320241	TRUE
AXL	0.10267	0.472724	FALSE
AZGP1	-0.118743	0.423902	TRUE
AZI2	0.631094	0.169497	TRUE
AZU1	0.149803	0.132663	FALSE
B2M	0.255852	0.53894	FALSE
B3GALNT1	0.251401	0.238235	FALSE
B3GALNT2	0.553789	0.092051	FALSE
B3GALT5	0.0420791	0.447059	FALSE
B3GALT6	0.495412	0.478136	FALSE
B3GAT3	0.389284	0.695285	FALSE
B3GLCT	0.460076	0.631746	FALSE
B3GNT2	0.165575	0.568104	FALSE
B3GNT3	0.108582	0.365668	FALSE
B3GNT5	0.437256	0.485281	FALSE
B3GNT6	0.296463	0.21222	FALSE
B3GNT7	0.254568	0.338229	FALSE
B3GNT8	0.071583	0.500216	FALSE
B3GNT9	0.45164	0.374289	FALSE
B3GNTL1	0.553421	0.30207	FALSE
B4GALNT3	0.525628	0.259583	FALSE
B4GALT1	0.607725	0.579933	FALSE
B4GALT2	0.628571	0.38738	FALSE
B4GALT3	0.382819	0.306353	FALSE
B4GALT4	0.388967	0.819709	FALSE
B4GALT5	0.476548	0.412088	FALSE
B4GALT7	0.589256	0.453012	FALSE
B9D1	0.548252	0.0059236	FALSE
B9D2	0.427083	0.354545	FALSE
BABAM1	0.575358	0.402617	FALSE
BACE2	0.41934	0.423529	FALSE
BACH1	0.42992	0.78693	TRUE
BAD	0.492197	0.379947	FALSE
BAG1	0.753321	0.722861	TRUE
BAG2	0.492336	0.725026	FALSE
BAG3	0.492569	0.541572	FALSE
BAG4	0.876436	0.678966	FALSE
BAG5	0.880737	0.703606	TRUE
BAHD1	0.387058	0.109091	FALSE
BAIAP2	0.413307	0.862816	FALSE
BAIAP2L1	0.689271	0.827042	FALSE
BAIAP2L2	0.085852	0.981818	FALSE
BAK1	0.235886	0.768023	TRUE
BANF1	0.677828	0.259947	TRUE
BANK1	0.20852	0.539752	FALSE
BANP	0.254856	0.286196	TRUE
BAP1	0.138921	0.142035	FALSE
BARD1	0.452086	-0.15642	TRUE
BARX2	0.036089	0.476471	FALSE
BASP1	0.0665354	0.843964	FALSE
BAX	0.515794	0.530887	TRUE
BAZ1A	0.734136	0.77553	TRUE
BAZ1B	0.808473	0.784808	TRUE
BAZ2A	0.399528	0.129997	TRUE
BAZ2B	0.640421	0.118482	FALSE
BBIP1	0.512745	0.0215889	TRUE
BBOX1	0.377272	0.779439	FALSE
BBS1	0.668877	0.234451	TRUE
BBS10	0.602589	-0.3	TRUE
BBS2	0.515332	0.307957	TRUE
BBS4	0.626396	0.370678	TRUE
BBS5	0.187165	0.053641	TRUE
BBS7	0.485289	0.227104	TRUE
BBS9	0.29909	0.199083	TRUE
BBX	0.476416	0.495813	FALSE
BCAM	0.164021	0.848467	FALSE
BCAN	0.503213	0.6	FALSE
BCAP29	0.502188	0.590833	FALSE
BCAP31	0.442195	0.603254	FALSE
BCAR1	0.38151	0.503176	TRUE
BCAR3	0.488813	0.705202	FALSE
BCAS1	0.0917548	0.807645	FALSE
BCAS2	0.601821	-0.0042023	TRUE
BCAS3	0.518901	0.322146	FALSE
BCAS4	0.433049	-0.0857143	FALSE
BCAT1	0.149516	0.803379	FALSE
BCAT2	0.526234	0.575846	FALSE
BCCIP	0.625318	0.624625	TRUE
BCDIN3D	0.434814	0.339323	FALSE
BCHE	0.324094	0.525309	FALSE
BCKDHA	0.587161	0.260892	FALSE
BCKDHB	0.558905	0.496557	FALSE
BCKDK	0.465781	0.306488	FALSE
BCL10	0.595332	0.662246	TRUE
BCL11A	0.484966	0.481702	FALSE
BCL11B	0.290157	0.551416	FALSE
BCL2	0.282979	0.366631	TRUE
BCL2A1	0.0576588	0.3	FALSE
BCL2L1	0.25132	0.440345	TRUE
BCL2L11	0.360422	0.335334	FALSE
BCL2L12	0.532311	0.148635	FALSE
BCL2L13	0.68421	0.675708	FALSE
BCL2L14	0.174652	0.610714	FALSE
BCL2L15	-0.0122133	0.294582	FALSE
BCL3	0.0244537	0.260622	TRUE
BCL6	0.415979	0.588235	TRUE
BCL7A	0.541932	0.733087	FALSE
BCL7B	0.532936	0.113235	FALSE
BCL7C	0.464723	-0.0589765	FALSE
BCL9	0.483171	0.19709	FALSE
BCL9L	0.391928	0.317142	FALSE
BCLAF1	0.552973	0.506922	FALSE
BCO2	0.298757	0.139877	FALSE
BCOR	0.338554	0.117194	TRUE
BCORL1	0.303882	0.149565	FALSE
BCR	0.740024	0.665229	FALSE
BCS1L	0.647631	0.609392	FALSE
BDH1	0.472194	0.665625	FALSE
BDH2	0.110513	0.547359	FALSE
BDP1	0.686366	0.106468	TRUE
BECN1	0.323483	0.113889	TRUE
BEND3	0.154127	0.498778	FALSE
BEST1	-0.0539969	0.136364	FALSE
BET1	0.52641	0.422669	FALSE
BET1L	0.70378	0.306223	FALSE
BFAR	0.502268	0.440326	TRUE
BGLAP	0.159189	0.6	FALSE
BGN	0.218442	0.590209	FALSE
BHLHA15	0.0233309	0.633649	FALSE
BHLHE40	0.21199	0.388273	FALSE
BICC1	-0.137266	0.729795	FALSE
BICD1	0.357081	0.569665	FALSE
BICD2	0.520291	0.831135	TRUE
BID	0.589411	0.841245	FALSE
BIN1	0.0477648	0.835572	TRUE
BIN2	-0.0474302	0.812701	FALSE
BIN3	0.681996	0.303313	FALSE
BIRC2	0.715525	0.669678	TRUE
BIRC3	0.142181	0.771429	TRUE
BIRC5	0.441291	0.455891	TRUE
BIRC6	0.648157	0.343127	FALSE
BLK	0.190468	-0.0206897	FALSE
BLM	0.475131	0.651206	TRUE
BLMH	0.456204	0.769205	FALSE
BLNK	0.235515	0.772491	TRUE
BLOC1S1	0.413268	0.102645	TRUE
BLOC1S2	0.497505	0.300426	TRUE
BLOC1S3	0.355165	-0.0397751	TRUE
BLOC1S4	0.695254	0.147566	TRUE
BLOC1S5	0.765036	0.33407	TRUE
BLOC1S6	0.655824	0.107361	TRUE
BLVRA	0.417016	0.758811	TRUE
BLVRB	0.195463	0.45943	FALSE
BLZF1	-0.0891162	0.39476	FALSE
BMF	0.0811927	0.469047	FALSE
BMP1	-0.0146962	0.621355	FALSE
BMP2	0.187788	0.8	TRUE
BMP2K	0.448925	0.790234	FALSE
BMP3	0.176449	-0.257143	FALSE
BMP7	-0.0754218	0.9	FALSE
BMPER	0.121268	0.137405	FALSE
BMPR2	0.444788	0.113174	FALSE
BMS1	0.700757	0.41732	FALSE
BMX	0.0969032	0.2316	FALSE
BNC1	0.211689	0.630713	FALSE
BNC2	0.0661522	0.191453	FALSE
BNIP1	0.468931	0.501616	FALSE
BNIP2	0.575347	0.37278	FALSE
BNIP3	0.120828	0.488579	FALSE
BNIP3L	0.501746	-0.0260961	FALSE
BNIPL	-0.250104	0.624581	FALSE
BOC	0.0324143	0.518182	FALSE
BOD1	0.320304	0.398434	TRUE
BOD1L1	0.773273	0.521508	TRUE
BOK	0.274758	0.229137	FALSE
BOLA1	0.546721	0.577786	FALSE
BOLA2	0.482333	0.544018	TRUE
BOLA3	0.366143	0.365611	FALSE
BOP1	0.583054	0.531947	TRUE
BORCS5	0.651424	0.299482	TRUE
BORCS6	0.488382	0.430867	TRUE
BORCS7	0.130625	0.343313	TRUE
BORCS8	0.534905	0.0975048	TRUE
BPGM	0.198316	0.755016	FALSE
BPHL	0.645928	0.635669	FALSE
BPI	-0.0957291	0.316868	FALSE
BPIFA1	-0.0099155	0.531029	FALSE
BPIFA2	0.00209811	-0.145087	FALSE
BPIFB1	0.0260233	0.521411	FALSE
BPIFB2	0.00096928	0.598814	FALSE
BPIFC	0.0257045	0.0857143	FALSE
BPNT1	0.504965	0.541597	FALSE
BPTF	0.520534	0.489297	TRUE
BRAF	0.68266	0.566747	TRUE
BRAP	0.694128	0.527683	FALSE
BRAT1	0.723884	0.593266	FALSE
BRCA1	0.566261	0.598664	TRUE
BRCA2	0.411891	0.111267	TRUE
BRCC3	0.495833	-0.0026756	TRUE
BRD1	0.555902	0.179343	TRUE
BRD3	0.431005	0.603308	FALSE
BRD4	0.432134	0.388349	TRUE
BRD7	0.785567	0.0535011	TRUE
BRD8	0.556121	0.44145	TRUE
BRD9	0.798644	0.246365	FALSE
BRF1	0.66162	0.408928	TRUE
BRF2	0.824465	0.557103	FALSE
BRI3BP	0.362441	0.289434	FALSE
BRIP1	0.370557	0.0363636	TRUE
BRIX1	0.770732	0.639849	TRUE
BRK1	0.529722	0.282355	TRUE
BRMS1	0.71103	-0.103466	TRUE
BRMS1L	0.747397	0.368172	TRUE
BROX	0.589902	0.581466	FALSE
BRPF1	0.434727	0.253315	TRUE
BRPF3	0.428157	0.143971	TRUE
BRWD1	0.713754	0.0256454	FALSE
BRWD3	0.493523	0.0324897	FALSE
BSCL2	0.23067	0.70038	FALSE
BSDC1	0.643727	0.54321	FALSE
BSG	0.538192	0.386364	TRUE
BSPRY	0.182232	0.741893	FALSE
BST1	0.41153	0.445573	FALSE
BST2	-0.0841714	0.885172	FALSE
BTAF1	0.68892	0.279978	FALSE
BTBD1	0.612441	0.122321	FALSE
BTBD10	0.687508	0.434891	FALSE
BTBD11	0.201527	0.637645	FALSE
BTBD2	0.486134	0.284866	FALSE
BTBD7	0.7754	0.117101	FALSE
BTBD9	0.386281	0.139311	FALSE
BTD	0.574375	0.347342	FALSE
BTF3	0.613768	0.346172	FALSE
BTF3L4	0.658075	0.272472	FALSE
BTG1	0.518958	0.442922	FALSE
BTG3	0.588479	0.6	FALSE
BTK	-0.0867536	0.824899	FALSE
BTLA	-0.0447999	0.734266	FALSE
BTN2A1	0.588908	0.477311	FALSE
BTN3A1	0.158094	0.0654022	FALSE
BTN3A2	0.121783	0.51914	FALSE
BTN3A3	0.155149	0.828509	FALSE
BTRC	0.746509	0.118182	TRUE
BUB1	0.591277	0.0796825	TRUE
BUB1B	0.455602	0.699812	TRUE
BUB3	0.627077	-0.0170976	TRUE
BUD13	0.548883	0.479046	TRUE
BUD31	0.726219	0.454965	TRUE
BYSL	0.61939	0.396602	FALSE
BZW1	0.246099	0.756116	TRUE
BZW2	0.658276	0.7405	FALSE
C10orf71	0.0459375	0.60632	FALSE
C10orf88	0.625827	0.347893	FALSE
C10orf99	0.248284	0.658828	FALSE
C11orf52	0.301133	0.73891	FALSE
C11orf54	0.734196	0.792552	FALSE
C11orf58	0.773706	0.645068	FALSE
C11orf68	0.746267	0.469542	FALSE
C11orf95	0.56182	0.529814	FALSE
C11orf96	-0.0846818	0.367995	FALSE
C12orf10	0.536498	0.57826	FALSE
C12orf29	0.18174	0.682017	FALSE
C12orf4	0.550896	0.177307	FALSE
C12orf43	0.564988	0.391619	FALSE
C12orf45	0.531669	0.528831	FALSE
C12orf57	0.480798	0.246501	FALSE
C12orf60	0.614388	0.6	FALSE
C12orf65	0.349021	0.0234105	FALSE
C12orf66	0.438546	0.0597026	TRUE
C12orf73	0.372501	0.304544	FALSE
C12orf75	0.0800749	0.741942	FALSE
C14orf119	0.717594	0.804369	FALSE
C14orf93	0.477176	0.236364	FALSE
C15orf39	0.331447	0.240346	FALSE
C15orf40	0.558727	0.574346	FALSE
C15orf41	0.461018	0.275945	FALSE
C15orf48	0.132441	0.778884	FALSE
C15orf62	0.283439	0.2	FALSE
C16orf54	-0.248187	0.142857	FALSE
C16orf58	0.454537	0.408282	FALSE
C16orf70	0.711395	0.114208	FALSE
C16orf72	0.644756	0.301843	FALSE
C16orf74	0.470379	0.29902	FALSE
C16orf89	0.0688825	0.29483	FALSE
C16orf91	0.47841	0.345455	FALSE
C17orf49	0.622526	0.392975	FALSE
C17orf53	0.59646	0.2	FALSE
C17orf58	0.345224	0.0112824	FALSE
C17orf75	0.472623	0.619415	FALSE
C17orf80	0.566404	0.251743	FALSE
C17orf97	0.354041	0.4901	FALSE
C18orf21	0.674317	-0.0352796	FALSE
C18orf25	0.670401	0.41518	FALSE
C18orf32	0.517037	0.45309	FALSE
C19orf12	0.487008	0.46943	FALSE
C19orf25	0.582209	0.185644	FALSE
C19orf33	-0.0160465	0.816004	FALSE
C19orf38	0.263495	0.3	FALSE
C19orf47	0.38041	0.348875	FALSE
C19orf53	0.614604	0.202302	FALSE
C19orf54	0.220434	-0.177887	FALSE
C19orf66	0.301633	0.687529	FALSE
C1D	0.348893	0.0912879	FALSE
C1GALT1	0.302742	0.53236	FALSE
C1GALT1C1	0.325116	0.178104	FALSE
C1orf109	0.668276	-0.0017031	FALSE
C1orf112	0.727067	0.330719	FALSE
C1orf116	-0.265823	0.896484	FALSE
C1orf122	0.606588	0.381075	FALSE
C1orf131	0.538318	0.217075	FALSE
C1orf159	0.600237	0.0165301	FALSE
C1orf174	0.639469	0.308236	FALSE
C1orf198	0.448959	0.764333	FALSE
C1orf21	0.286459	0.568542	FALSE
C1orf210	0.402221	0.475905	FALSE
C1orf226	0.0738627	0.469013	FALSE
C1orf35	0.584523	0.633313	FALSE
C1orf43	0.653678	0.7	FALSE
C1orf50	0.635964	0.51054	FALSE
C1orf52	0.487625	0.117096	FALSE
C1QA	0.0874173	0.381879	TRUE
C1QB	0.0553374	0.333207	TRUE
C1QBP	0.647376	0.428037	TRUE
C1QC	0.0813862	0.279352	TRUE
C1QTNF2	0.446853	0.151648	FALSE
C1QTNF3	0.22792	0.488541	FALSE
C1QTNF5	-0.0148296	0.673959	FALSE
C1QTNF6	-0.0510722	0.186565	FALSE
C1QTNF7	0.345993	0.221916	FALSE
C1QTNF8	-0.0062127	-0.357813	FALSE
C1QTNF9	0.244635	0.113896	FALSE
C1R	0.0640269	0.41828	FALSE
C1RL	0.505771	0.434162	FALSE
C1S	0.0232292	0.457185	FALSE
C20orf194	0.289899	0.347504	FALSE
C20orf27	0.548087	0.47619	FALSE
C21orf91	0.407049	0.300097	FALSE
C2CD2	0.295576	0.215135	FALSE
C2CD2L	0.649432	0.358682	FALSE
C2CD3	0.737719	0.348291	FALSE
C2CD4C	0.00314889	0.723426	FALSE
C2CD5	0.541968	0.789284	FALSE
C2orf40	-0.109959	0.6	FALSE
C2orf42	0.493944	-0.242514	FALSE
C2orf49	0.720046	0.622754	FALSE
C2orf68	0.831516	0.0627579	FALSE
C2orf69	0.638019	0.510967	FALSE
C2orf76	-0.0268818	0.0430312	FALSE
C2orf88	0.283874	-0.001751	FALSE
C3	0.202774	0.176461	TRUE
C3AR1	-0.205679	-0.40584	FALSE
C3orf38	0.623923	0.530408	FALSE
C3orf52	0.443224	-0.154546	FALSE
C4BPA	-0.297848	-0.0314755	FALSE
C4BPB	-0.283894	-0.0049176	FALSE
C4orf3	0.372529	0.262584	FALSE
C4orf33	0.548306	0.234436	FALSE
C5	-0.0023187	-0.144181	FALSE
C5AR1	0.0660464	0.621097	FALSE
C5orf15	0.599116	0.32038	FALSE
C5orf22	0.826416	0.669409	FALSE
C5orf24	0.472401	0.327429	FALSE
C5orf51	0.778653	0.643356	FALSE
C6	-0.112638	0.016551	FALSE
C6orf120	0.5053	0.46845	FALSE
C6orf132	0.20121	0.750049	FALSE
C6orf141	0.15006	0.263817	FALSE
C6orf203	0.503532	0.229415	FALSE
C6orf223	0.260952	-0.166947	FALSE
C6orf58	0.0294868	0.379569	FALSE
C6orf89	0.674805	0.132904	FALSE
C7	-0.0119996	0.106267	FALSE
C7orf25	0.587131	0.673356	FALSE
C7orf26	0.697783	0.205535	FALSE
C7orf50	0.606598	0.574528	FALSE
C8A	0.219245	0.211437	FALSE
C8B	0.104278	0.090846	FALSE
C8G	0.257594	0.0379804	FALSE
C8orf33	0.67617	0.299238	FALSE
C8orf37	0.609812	0.015714	FALSE
C8orf76	0.646175	-0.120098	FALSE
C8orf82	0.541188	0.444684	FALSE
C8orf88	0.060032	0.6	FALSE
C9	-0.016105	0.160353	FALSE
C9orf16	0.294095	0.306407	FALSE
C9orf40	0.513858	0.466534	FALSE
C9orf64	0.54564	0.658286	FALSE
C9orf72	0.555475	0.324626	TRUE
C9orf78	0.801958	0.495122	FALSE
C9orf85	0.585202	0.226371	FALSE
CA1	0.16235	0.098327	FALSE
CA12	0.457951	0.909166	FALSE
CA13	0.148463	0.734104	FALSE
CA2	0.165124	0.840541	FALSE
CA3	-0.0552933	0.643627	FALSE
CA4	-0.0397439	-0.0728821	FALSE
CA5B	0.351363	0.483195	FALSE
CA6	0.162862	-0.116711	FALSE
CA8	-0.255395	0.45472	FALSE
CA9	-0.0240251	0.894078	FALSE
CAAP1	0.837254	0.204246	FALSE
CAB39	0.371125	0.887526	TRUE
CAB39L	0.503379	0.66496	FALSE
CABIN1	0.524283	0.0429746	TRUE
CABLES1	0.391679	-0.177966	FALSE
CABLES2	0.296974	-0.244022	FALSE
CACFD1	0.214215	0.275939	FALSE
CACHD1	0.0129119	0.495719	FALSE
CACNA1F	0.27659	-0.572727	FALSE
CACNA1S	-0.0823541	0.672457	FALSE
CACNA2D1	0.120566	0.817449	FALSE
CACNA2D2	0.250175	0.20904	FALSE
CACNB1	0.205929	0.673946	FALSE
CACNG1	-0.0610768	0.714432	FALSE
CACNG6	0.0556871	-0.138889	FALSE
CACTIN	0.568626	0.489932	TRUE
CACUL1	0.647043	0.604358	FALSE
CACYBP	0.687857	0.787223	TRUE
CAD	0.698325	0.720518	FALSE
CADM1	0.0319565	0.730303	TRUE
CADM2	0.242063	0.428571	FALSE
CADM3	-0.325381	0.589118	FALSE
CADM4	0.363887	0.638354	FALSE
CADPS	0.203118	0.154116	FALSE
CADPS2	0.148626	0.707764	FALSE
CALB1	0.272446	0.619988	FALSE
CALB2	0.343557	0.859328	FALSE
CALCA	0.135423	-0.124675	FALSE
CALCB	-0.151798	0.168952	FALSE
CALCOCO1	0.21271	0.405751	FALSE
CALCOCO2	0.125582	0.449557	FALSE
CALCRL	0.136612	0.591145	TRUE
CALD1	0.0160706	0.803058	FALSE
CALHM2	0.329434	-0.328671	FALSE
CALM1	0.530074	0.399048	TRUE
CALML3	0.479888	0.935226	FALSE
CALML4	0.422169	0.4	FALSE
CALML5	0.419055	0.887473	FALSE
CALR	0.11307	0.394154	TRUE
CALU	0.313995	0.709467	FALSE
CAMK1	0.461034	0.631404	FALSE
CAMK1D	0.0753234	0.641242	FALSE
CAMK2A	0.285852	0.597174	TRUE
CAMK2B	0.0836941	0.581201	FALSE
CAMK2D	0.615184	0.759837	TRUE
CAMK2G	0.533251	0.520376	FALSE
CAMK4	0.482141	0.580259	FALSE
CAMKK1	0.243939	0.222729	FALSE
CAMKK2	0.626115	0.42317	FALSE
CAMKMT	0.608157	0.519387	FALSE
CAMLG	0.505653	0.196433	TRUE
CAMP	0.342408	0.180521	FALSE
CAMSAP1	0.527295	0.529015	FALSE
CAMSAP2	0.356358	0.775068	FALSE
CAMSAP3	0.242121	0.80753	FALSE
CAND1	0.707831	0.61342	TRUE
CAND2	0.18167	0.664938	FALSE
CANT1	0.531397	0.607369	FALSE
CANX	0.593149	0.45695	TRUE
CAP1	0.685033	0.699822	TRUE
CAP2	0.329252	0.802709	FALSE
CAPG	0.0227342	0.712183	TRUE
CAPN1	0.550884	0.555017	TRUE
CAPN14	0.0104999	0.297545	FALSE
CAPN15	0.332431	0.0811736	FALSE
CAPN2	0.139089	0.480893	FALSE
CAPN3	0.232834	0.453553	FALSE
CAPN5	0.438405	0.496555	FALSE
CAPN6	-0.0465333	0.476751	FALSE
CAPN7	0.56652	0.662022	FALSE
CAPNS1	0.586559	0.207316	TRUE
CAPNS2	0.425772	0.874761	FALSE
CAPRIN1	0.810099	0.573564	TRUE
CAPRIN2	0.271539	-0.142857	FALSE
CAPS	0.327898	0.491974	FALSE
CAPZA1	0.805992	0.323367	TRUE
CAPZA2	0.615441	0.283691	FALSE
CAPZB	0.631123	0.544724	TRUE
CARD10	0.182738	0.539125	FALSE
CARD11	-0.30916	0.706471	TRUE
CARD14	0.365137	0.796433	FALSE
CARD16	0.401963	0.580643	FALSE
CARD17	0.488292	0.836223	FALSE
CARD18	0.306112	0.855532	FALSE
CARD19	0.486282	0.112949	FALSE
CARD6	0.126215	0.707723	FALSE
CARD8	0.225891	0.622886	TRUE
CARD9	-0.0049666	0.707611	FALSE
CARHSP1	0.357779	0.760959	FALSE
CARM1	0.488323	0.551778	TRUE
CARNMT1	0.711606	0.730819	FALSE
CARNS1	0.328605	0.467129	FALSE
CARS	0.770435	0.734192	FALSE
CARS2	0.791848	0.542318	FALSE
CASC3	0.575099	0.150821	TRUE
CASC4	0.221837	0.677791	FALSE
CASD1	0.389743	-0.0313909	FALSE
CASK	0.36942	0.829058	TRUE
CASKIN2	0.516444	0.221806	FALSE
CASP1	0.512018	0.868695	TRUE
CASP10	0.105803	0.905548	TRUE
CASP14	-0.156306	0.82408	FALSE
CASP2	0.738	0.645798	TRUE
CASP3	0.655436	0.598024	FALSE
CASP4	0.607392	0.919658	FALSE
CASP6	0.588908	0.69082	FALSE
CASP7	0.551975	0.737066	FALSE
CASP8	0.25839	0.766295	TRUE
CASP8AP2	0.515087	-0.197403	FALSE
CASP9	0.358777	0.393528	TRUE
CASQ1	-0.179248	0.720443	FALSE
CASQ2	0.0924427	0.866437	FALSE
CASS4	-0.0898298	0.336097	FALSE
CAST	0.684612	0.831537	FALSE
CASZ1	0.122772	0.514988	FALSE
CAT	0.298926	0.375089	FALSE
CAV1	0.0397162	0.826293	TRUE
CAV2	0.336905	0.518023	FALSE
CAV3	0.219708	0.657294	TRUE
CBFA2T2	0.410401	0.508583	FALSE
CBFA2T3	0.0958366	0.385569	FALSE
CBFB	0.745563	0.538841	TRUE
CBL	0.673017	0.582957	TRUE
CBLB	0.409986	0.669859	TRUE
CBLC	0.231398	0.699724	FALSE
CBLL1	0.800233	0.471524	FALSE
CBR1	0.365274	0.88143	FALSE
CBR3	0.476989	0.836709	FALSE
CBR4	0.606208	0.341841	FALSE
CBS	0.114842	0.545923	FALSE
CBWD1	0.59865	0.9	FALSE
CBWD2	0.548771	0.0446361	FALSE
CBWD6	0.692221	0.657143	FALSE
CBX1	0.578706	0.445952	FALSE
CBX2	0.3844	0.588705	TRUE
CBX3	0.655422	0.372718	TRUE
CBX4	0.317121	0.421405	TRUE
CBX5	0.252041	0.736158	TRUE
CBX6	0.596792	0.188157	FALSE
CBX7	0.348414	-0.0299587	FALSE
CBX8	0.31077	0.608239	TRUE
CBY1	0.599621	0.223776	FALSE
CC2D1A	0.592323	0.623498	FALSE
CC2D1B	0.567962	0.725251	FALSE
CCAR1	0.599337	0.480985	TRUE
CCAR2	0.737636	0.825824	TRUE
CCDC102A	0.294529	0.34247	FALSE
CCDC102B	0.103158	0.4	FALSE
CCDC106	0.287371	0.594182	FALSE
CCDC110	0.116889	0.0958498	FALSE
CCDC115	0.599707	0.249429	FALSE
CCDC117	0.757835	0.604314	FALSE
CCDC12	0.393514	0.19729	FALSE
CCDC120	0.0582964	0.627113	FALSE
CCDC124	0.324056	0.481746	FALSE
CCDC126	0.475607	0.564251	FALSE
CCDC127	0.662199	0.551012	FALSE
CCDC130	0.733225	0.0936832	FALSE
CCDC134	0.607409	0.695935	FALSE
CCDC137	0.559105	0.369836	FALSE
CCDC138	0.576538	-0.2	FALSE
CCDC14	0.556166	0.305536	FALSE
CCDC141	-0.238035	-0.284416	FALSE
CCDC149	0.447028	0.467355	FALSE
CCDC150	0.60835	0.132867	FALSE
CCDC158	-0.030052	0.180922	FALSE
CCDC174	0.466648	0.413699	FALSE
CCDC177	0.0953176	-0.0285714	FALSE
CCDC18	0.338055	-0.0809769	FALSE
CCDC186	0.605454	0.755488	FALSE
CCDC22	0.587416	0.133312	TRUE
CCDC25	0.776279	0.82413	FALSE
CCDC28A	0.646763	0.360729	FALSE
CCDC28B	0.256726	0.740351	FALSE
CCDC43	0.405898	0.436886	FALSE
CCDC47	0.600467	0.482024	FALSE
CCDC50	0.240139	0.833909	FALSE
CCDC51	-0.0339711	0.314815	FALSE
CCDC58	0.57745	0.41594	FALSE
CCDC59	0.695864	0.181252	FALSE
CCDC6	0.494806	0.733859	FALSE
CCDC61	0.488822	0.340639	FALSE
CCDC69	0.440513	0.89011	FALSE
CCDC7	0.33693	0.207072	FALSE
CCDC71L	0.163315	0.503567	FALSE
CCDC77	0.655367	-0.0867899	FALSE
CCDC8	0.161139	0.78991	TRUE
CCDC80	0.183021	0.709157	FALSE
CCDC81	0.304245	0.398601	FALSE
CCDC82	0.552642	0.257478	FALSE
CCDC84	0.808093	-0.118182	FALSE
CCDC85C	0.405377	0.550584	FALSE
CCDC86	0.582507	0.577961	FALSE
CCDC88A	0.30486	0.772152	FALSE
CCDC88B	0.150547	0.544424	FALSE
CCDC88C	0.264564	0.65973	FALSE
CCDC9	0.34119	0.370836	FALSE
CCDC90B	0.823672	0.428442	FALSE
CCDC91	0.50648	0.579078	FALSE
CCDC92	0.233355	0.340176	TRUE
CCDC93	0.58461	0.0608962	TRUE
CCDC97	0.592995	0.36617	FALSE
CCL14	-0.0482297	0.28621	FALSE
CCL16	0.0541727	-0.196565	FALSE
CCL18	-0.001801	0.638878	FALSE
CCL19	0.0855249	0.646753	FALSE
CCL20	0.22401	0.459757	FALSE
CCL21	0.22106	0.766242	FALSE
CCL24	-0.207195	0.697059	FALSE
CCL28	0.0952448	0.127192	FALSE
CCL5	-0.0270794	0.810509	FALSE
CCM2	0.220238	0.586643	FALSE
CCNA2	0.389216	0.667137	TRUE
CCNB1	0.268426	0.765714	TRUE
CCNB2	0.561993	0.601224	TRUE
CCNC	0.584243	0.169373	TRUE
CCND1	0.825258	0.662941	TRUE
CCND2	0.180747	0.542401	TRUE
CCND3	0.36006	0.542857	TRUE
CCNDBP1	0.436003	0.212416	FALSE
CCNE1	0.473579	0.336364	TRUE
CCNE2	0.454525	0.701596	FALSE
CCNH	0.783885	-0.137508	TRUE
CCNK	0.64443	0.302539	TRUE
CCNL1	0.514218	0.353272	FALSE
CCNL2	0.733163	0.130292	FALSE
CCNT1	0.678508	0.674591	TRUE
CCNT2	0.674294	0.133918	TRUE
CCNY	0.672434	0.309826	FALSE
CCNYL1	0.281975	0.58291	FALSE
CCP110	0.459079	0.0918374	TRUE
CCPG1	-0.0987736	0.373209	FALSE
CCR1	0.451121	0.588694	FALSE
CCS	0.78554	0.539701	FALSE
CCSER2	0.45449	0.409124	FALSE
CCT2	0.535691	0.252863	TRUE
CCT3	0.384004	0.202966	TRUE
CCT4	0.632967	0.264501	TRUE
CCT5	0.771978	0.00505862	TRUE
CCT6A	0.712658	0.234254	TRUE
CCT6B	0.284826	0.382564	FALSE
CCT7	0.569614	0.239151	TRUE
CCT8	0.731535	0.536685	TRUE
CCZ1	0.398308	0.321171	FALSE
CD101	0.366518	0.448575	FALSE
CD109	0.443444	0.800516	FALSE
CD14	0.437204	0.763881	FALSE
CD151	0.528752	0.663437	TRUE
CD163	-0.187338	0.829025	FALSE
CD163L1	-0.118988	0.721534	FALSE
CD177	0.101179	0.614218	FALSE
CD180	0.390483	0.294074	FALSE
CD19	-0.22291	0.923077	TRUE
CD1A	-0.470693	0.745878	FALSE
CD1C	-0.442561	0.2	FALSE
CD2	0.271569	0.873389	FALSE
CD200	-0.0401453	0.512522	FALSE
CD200R1	0.14825	0.0489511	FALSE
CD207	-0.208628	0.829996	FALSE
CD209	0.0767206	0.791452	FALSE
CD22	-0.13019	0.539216	FALSE
CD247	-0.328759	0.61403	FALSE
CD248	0.179686	0.609322	FALSE
CD27	-0.064275	0.724948	FALSE
CD274	0.616603	0.751965	FALSE
CD276	0.341297	0.71709	FALSE
CD28	-0.178624	0.515538	TRUE
CD2AP	0.639314	0.672544	TRUE
CD2BP2	0.540266	0.091022	TRUE
CD300A	-0.334386	0.690041	FALSE
CD320	0.36015	0.46411	FALSE
CD33	0.208126	0.566154	FALSE
CD34	-0.226315	0.582891	FALSE
CD36	-0.174007	0.821454	FALSE
CD37	0.125693	0.564913	FALSE
CD38	0.122543	0.537746	FALSE
CD3D	0.0867379	0.631164	FALSE
CD3E	0.131719	0.739795	FALSE
CD3EAP	0.395163	0.516	TRUE
CD3G	0.129842	0.845632	FALSE
CD4	-0.0913013	0.845077	FALSE
CD40	0.29889	0.834707	FALSE
CD44	0.555202	0.703627	TRUE
CD46	0.62613	0.639717	FALSE
CD47	0.254922	0.629028	TRUE
CD48	-0.393104	0.870573	FALSE
CD5	0.00015747	0.810403	FALSE
CD53	0.303993	0.755089	TRUE
CD55	-0.278981	0.513683	FALSE
CD58	0.62859	0.566658	FALSE
CD59	0.358363	0.686069	FALSE
CD5L	-0.263076	-0.0354909	FALSE
CD6	0.0598744	0.564867	FALSE
CD63	0.173962	0.523307	TRUE
CD68	0.0921564	0.626993	FALSE
CD7	-0.0724778	0.690907	FALSE
CD70	-0.0479252	0.783217	FALSE
CD72	0.145156	0.0714286	FALSE
CD74	0.343314	0.904912	FALSE
CD79A	0.12777	0.802555	FALSE
CD79B	-0.293469	0.785714	FALSE
CD81	0.507243	0.358645	TRUE
CD82	0.374917	0.671982	FALSE
CD83	0.117777	0.745203	FALSE
CD84	-0.204337	0.5128	FALSE
CD86	-0.0748021	0.7	FALSE
CD8A	-0.249017	0.750106	TRUE
CD9	0.584084	0.866675	TRUE
CD93	-0.100385	0.593309	FALSE
CD99L2	0.374576	0.732936	FALSE
CDA	0.295376	0.767825	FALSE
CDAN1	0.693401	0.393907	TRUE
CDC123	0.730082	0.275598	FALSE
CDC16	0.78091	0.617637	TRUE
CDC20	0.419024	0.66936	TRUE
CDC23	0.698963	0.366559	TRUE
CDC25B	0.488405	0.316237	FALSE
CDC25C	0.314088	0.294261	FALSE
CDC26	0.590006	0.0575392	FALSE
CDC27	0.411735	0.465456	TRUE
CDC34	0.592739	0.554396	TRUE
CDC37	0.496891	0.723446	TRUE
CDC37L1	0.841594	0.855461	FALSE
CDC40	0.711901	0.452189	TRUE
CDC42	0.717806	0.150278	TRUE
CDC42BPA	0.69241	0.74073	FALSE
CDC42BPB	0.693819	0.769571	FALSE
CDC42BPG	0.49924	0.637986	FALSE
CDC42EP1	0.463361	0.50454	FALSE
CDC42EP2	0.322605	0.368571	FALSE
CDC42EP3	0.118351	0.383557	FALSE
CDC42EP4	0.417936	0.704132	FALSE
CDC42EP5	0.110494	0.644239	FALSE
CDC42SE1	0.323791	0.482981	FALSE
CDC42SE2	0.61961	0.225249	FALSE
CDC45	0.635895	0.360961	FALSE
CDC5L	0.75103	0.50407	TRUE
CDC7	0.318317	0.241512	TRUE
CDC73	0.617963	0.48429	TRUE
CDCA2	0.545412	0.340149	FALSE
CDCA3	0.628191	0.395183	FALSE
CDCA5	0.547591	0.752444	TRUE
CDCA7	0.481089	0.3859	FALSE
CDCA7L	0.570012	0.433895	FALSE
CDCA8	0.466005	0.431526	TRUE
CDCP1	0.0894449	0.806314	TRUE
CDH1	0.390948	0.674839	TRUE
CDH11	0.0218733	0.883012	FALSE
CDH13	0.428497	0.630686	FALSE
CDH15	0.250601	0.828571	FALSE
CDH17	0.0621424	0.828571	FALSE
CDH19	0.198634	0.714286	FALSE
CDH2	0.0677572	0.456783	TRUE
CDH26	0.0126476	0.019618	FALSE
CDH3	0.438336	0.658513	FALSE
CDH4	0.169918	-0.5	FALSE
CDH5	-0.0046695	0.619093	TRUE
CDH6	0.141171	0.569326	FALSE
CDIPT	0.459572	0.155653	FALSE
CDK1	0.559603	0.804237	TRUE
CDK10	0.738985	-0.0328733	FALSE
CDK11A	0.488602	0.427498	FALSE
CDK11B	0.631406	0.126285	FALSE
CDK12	0.543503	0.422153	TRUE
CDK13	0.629354	0.498512	FALSE
CDK14	0.10224	0.357477	FALSE
CDK16	0.496695	0.306556	FALSE
CDK17	0.555837	0.472432	FALSE
CDK18	0.278042	0.609361	FALSE
CDK19	0.494282	0.472561	TRUE
CDK2	0.396835	0.748337	TRUE
CDK2AP1	0.140702	0.101175	FALSE
CDK4	0.513196	0.406916	TRUE
CDK5	0.691796	0.558934	TRUE
CDK5RAP1	0.682317	0.209427	FALSE
CDK5RAP2	0.49236	0.395809	FALSE
CDK5RAP3	0.430146	0.415925	FALSE
CDK6	0.415637	0.807548	TRUE
CDK7	0.526699	0.352803	TRUE
CDK8	0.641998	0.421569	TRUE
CDK9	0.657539	0.116292	TRUE
CDKAL1	0.667373	0.518713	FALSE
CDKL5	0.326873	0.183168	FALSE
CDKN1A	0.109255	0.533007	TRUE
CDKN1B	0.582842	0.632783	TRUE
CDKN1C	0.145425	0.534718	FALSE
CDKN2A	0.753368	0.626686	TRUE
CDKN2AIP	0.519515	0.515812	FALSE
CDKN2AIPNL	0.32475	0.0840018	FALSE
CDKN2B	0.815416	0.415538	FALSE
CDKN2C	0.0278743	0.570666	FALSE
CDKN2D	0.412663	0.371429	FALSE
CDNF	0.0934582	0.11527	FALSE
CDPF1	0.488802	0.132283	FALSE
CDR2L	0.310548	0.431476	FALSE
CDS1	0.572986	0.542807	TRUE
CDS2	0.644013	0.645132	FALSE
CDT1	0.415318	0.159758	TRUE
CDV3	0.50478	0.570514	FALSE
CDYL	0.501465	0.489805	TRUE
CDYL2	0.0997126	0.881319	FALSE
CEACAM1	0.0359436	0.337234	FALSE
CEACAM19	-0.0700058	0.797251	FALSE
CEACAM5	0.0240119	0.788261	FALSE
CEACAM6	-0.0324189	0.512449	FALSE
CEACAM7	-0.0324058	0.57091	FALSE
CEACAM8	-0.148026	0.176607	FALSE
CEBPA	0.393499	0.527126	TRUE
CEBPB	0.143115	0.603378	FALSE
CEBPD	0.322361	0.571483	FALSE
CEBPG	0.685522	0.459486	FALSE
CEBPZ	0.68329	0.736346	FALSE
CEBPZOS	0.654437	0.606399	FALSE
CEL	0.227672	0.504814	FALSE
CELF1	0.758263	0.412529	FALSE
CELF2	0.192843	0.81117	FALSE
CELSR1	0.577349	0.561046	FALSE
CELSR2	0.16851	0.657015	FALSE
CEMIP	0.220397	0.749019	FALSE
CEND1	0.110078	0.294118	FALSE
CENPA	0.573712	0.288462	TRUE
CENPB	0.592786	0.197343	TRUE
CENPC	0.4408	0.43562	TRUE
CENPE	0.401765	0.301073	FALSE
CENPF	0.694838	0.795597	FALSE
CENPH	0.200502	0.403123	TRUE
CENPI	0.621853	0.693134	TRUE
CENPJ	0.401019	0.714286	FALSE
CENPK	0.204611	0.461051	TRUE
CENPL	0.585595	0.714083	TRUE
CENPM	0.590023	0.544564	TRUE
CENPN	0.628635	0.203922	TRUE
CENPO	0.647371	0.498205	TRUE
CENPP	0.623056	0.379141	TRUE
CENPQ	0.477216	0.0818117	TRUE
CENPT	0.649066	0.118029	TRUE
CENPU	0.457866	0.564109	TRUE
CENPV	0.248803	0.634739	FALSE
CEP104	0.707965	0.413541	FALSE
CEP112	-0.0159336	0.0331021	FALSE
CEP120	0.510491	0.151643	FALSE
CEP128	0.356372	0.585024	FALSE
CEP131	0.560928	0.423327	TRUE
CEP135	0.579178	0.313091	FALSE
CEP152	0.473657	0.477004	FALSE
CEP164	0.664095	0.278373	TRUE
CEP170	0.26959	0.776663	FALSE
CEP170B	0.65902	0.652323	FALSE
CEP192	0.681842	0.371257	FALSE
CEP250	0.597337	0.416355	FALSE
CEP290	0.437151	0.163872	TRUE
CEP350	0.658534	0.478038	FALSE
CEP41	0.340426	0.729263	FALSE
CEP44	0.43323	0.313339	FALSE
CEP55	0.358961	0.752411	TRUE
CEP57	0.754816	0.356176	FALSE
CEP63	0.683109	0.06028	FALSE
CEP68	0.612918	0.49433	FALSE
CEP76	0.659458	0.240303	FALSE
CEP78	0.52987	0.474897	FALSE
CEP83	0.375559	0.192256	FALSE
CEP85	0.206281	0.357107	FALSE
CEP89	0.528558	0.513215	FALSE
CEP95	0.64742	-0.0385413	FALSE
CEP97	0.726376	0.604298	FALSE
CEPT1	0.793408	0.381811	FALSE
CERCAM	-0.232469	0.561723	FALSE
CERK	0.400178	0.0673591	FALSE
CERS2	0.702885	0.581107	FALSE
CERS3	0.280742	0.863222	FALSE
CERS4	0.451454	0.47266	FALSE
CERS5	0.569827	0.329421	FALSE
CERS6	0.616403	0.669277	FALSE
CES1	-0.0166086	0.751529	FALSE
CES2	0.368246	0.841321	FALSE
CES3	-0.155439	-0.0955882	FALSE
CETN2	0.404217	0.272665	FALSE
CETN3	0.443756	0.34444	FALSE
CETP	0.085368	0.158684	FALSE
CFAP20	0.673012	0.532958	TRUE
CFAP36	0.444453	0.53542	FALSE
CFAP97	0.570419	0.175119	FALSE
CFD	0.241117	0.358016	FALSE
CFDP1	0.681285	0.757947	FALSE
CFH	-0.260076	0.488196	FALSE
CFHR1	0.15697	0.0418038	FALSE
CFHR2	0.120701	-0.003607	FALSE
CFHR3	0.348929	0.0569678	FALSE
CFHR4	0.235568	0.0630684	FALSE
CFHR5	0.342631	0.0982679	FALSE
CFI	0.164313	0.351638	FALSE
CFL1	0.653874	0.555364	TRUE
CFL2	0.284597	0.731023	FALSE
CFLAR	0.393476	0.0962791	TRUE
CFP	0.180722	0.227986	FALSE
CFTR	0.222004	-0.137083	TRUE
CGGBP1	0.64564	0.683522	FALSE
CGN	0.15193	0.888986	FALSE
CGNL1	0.0344084	0.694595	FALSE
CGREF1	0.359695	0.693819	FALSE
CHAC2	0.347826	0.653625	FALSE
CHAD	-0.115561	0.075884	TRUE
CHADL	0.323163	0.15068	FALSE
CHAF1A	0.495731	0.813808	TRUE
CHAF1B	0.227707	0.701791	TRUE
CHAMP1	0.55618	0.308338	FALSE
CHCHD1	0.605429	0.0763969	FALSE
CHCHD10	0.462651	0.513179	FALSE
CHCHD2	0.694462	0.515985	FALSE
CHCHD3	0.76065	0.586269	TRUE
CHCHD4	-0.0331889	0.259055	FALSE
CHCHD5	0.454548	0.224534	FALSE
CHCHD6	0.712772	0.598857	TRUE
CHCHD7	0.53932	0.182963	FALSE
CHD1	0.730673	0.461274	FALSE
CHD1L	0.661253	0.599662	FALSE
CHD2	0.495305	0.33351	FALSE
CHD3	0.41777	0.677231	TRUE
CHD4	0.394613	0.524616	TRUE
CHD6	0.39872	0.187959	FALSE
CHD7	0.459132	0.350747	FALSE
CHD8	0.838144	0.544791	TRUE
CHD9	0.724486	0.0781913	FALSE
CHDH	0.0056555	0.535171	FALSE
CHEK1	0.417735	0.72935	TRUE
CHEK2	0.637928	0.784198	TRUE
CHERP	0.387385	0.423968	TRUE
CHFR	0.409281	0.410324	FALSE
CHGA	0.142429	0.0780485	FALSE
CHGB	0.13618	0.613183	FALSE
CHI3L1	-0.258448	0.693754	FALSE
CHI3L2	0.332586	0.768568	FALSE
CHID1	0.524148	0.31264	FALSE
CHIT1	-0.309597	0.382311	FALSE
CHKA	0.469538	0.219676	FALSE
CHKB	0.490977	0.677339	FALSE
CHL1	0.161186	0.79478	FALSE
CHM	0.385413	0.594046	TRUE
CHML	0.466461	0.647087	FALSE
CHMP1A	0.75805	0.724628	TRUE
CHMP1B	0.563504	0.438316	TRUE
CHMP2A	0.5506	0.5011	TRUE
CHMP2B	0.566594	0.616871	TRUE
CHMP3	0.410368	0.562483	TRUE
CHMP4A	0.789648	0.707986	TRUE
CHMP4B	0.611178	0.539067	TRUE
CHMP4C	0.385279	0.823908	TRUE
CHMP5	0.810679	0.69229	TRUE
CHMP6	0.426293	0.367995	TRUE
CHMP7	0.809178	0.733159	FALSE
CHN1	-0.266603	-0.0239421	FALSE
CHN2	0.0550496	0.828571	FALSE
CHORDC1	0.572377	0.609749	FALSE
CHP1	0.539646	0.273192	FALSE
CHPF	0.293742	0.427748	FALSE
CHPF2	0.593385	0.402287	FALSE
CHPT1	0.255683	0.431621	FALSE
CHRAC1	0.645969	0.497029	TRUE
CHRD	-0.18658	0.647761	FALSE
CHRDL1	0.0377855	0.435973	FALSE
CHST11	0.207531	0.681466	FALSE
CHST12	0.229891	0.256059	FALSE
CHST14	0.318252	0.701996	FALSE
CHST15	0.435582	0.34965	FALSE
CHST2	-0.0853793	0.77159	FALSE
CHST3	0.146122	0.478883	FALSE
CHST4	0.0174834	0.214286	FALSE
CHST6	-0.020361	0.49655	FALSE
CHST7	0.102441	0.220588	FALSE
CHST9	0.183893	0.147898	FALSE
CHSY1	0.482998	0.538503	FALSE
CHSY3	0.115374	0.161809	FALSE
CHTF18	0.344465	0.592843	TRUE
CHTF8	0.572113	0.0945253	TRUE
CHTOP	0.620935	0.178292	TRUE
CHUK	0.621991	0.577552	TRUE
CHURC1	0.476023	0.22287	FALSE
CIAO1	0.672795	0.24282	TRUE
CIAPIN1	0.767805	0.766221	FALSE
CIB1	0.503577	0.213469	TRUE
CIC	0.130409	0.289312	TRUE
CILP	0.0123423	0.776468	FALSE
CILP2	0.0612594	0.00338459	FALSE
CINP	0.649254	0.306035	FALSE
CIR1	0.515147	0.382864	FALSE
CIRBP	0.442062	0.527925	TRUE
CISD1	0.437137	0.223379	FALSE
CISD2	0.571779	0.286374	TRUE
CISD3	0.569784	0.159156	FALSE
CIT	0.27305	0.734485	FALSE
CITED2	0.138189	0.071127	FALSE
CITED4	0.475518	0.51839	FALSE
CIZ1	0.505287	0.109474	FALSE
CKAP2	0.571846	0.638178	FALSE
CKAP2L	0.512562	0.595758	FALSE
CKAP4	0.369352	0.803322	FALSE
CKAP5	0.780496	0.690303	TRUE
CKB	0.128143	0.746288	TRUE
CKM	-0.052427	0.694893	FALSE
CKMT1A	0.413089	0.897827	FALSE
CKMT2	0.356682	0.627886	FALSE
CKS1B	0.538578	0.68103	TRUE
CKS2	0.486867	0.340041	FALSE
CLASP1	0.658906	0.688371	FALSE
CLASP2	0.500229	0.790444	FALSE
CLASRP	0.558702	0.163603	FALSE
CLC	-0.0334908	0.709783	FALSE
CLCA2	0.536351	0.915484	FALSE
CLCA4	-0.125558	0.485731	FALSE
CLCC1	0.333	0.55695	FALSE
CLCN1	0.223342	0.0490196	FALSE
CLCN2	0.70864	0.342657	FALSE
CLCN3	0.568783	0.547896	FALSE
CLCN5	0.618089	0.0214365	FALSE
CLCN6	0.418141	-0.0060977	FALSE
CLCN7	0.224891	0.246291	FALSE
CLCNKA	0.00181881	-0.19587	FALSE
CLDN1	0.152167	0.851833	TRUE
CLDN10	-0.0004495	0.500299	FALSE
CLDN12	0.508198	0.0043158	FALSE
CLDN15	0.549449	1	FALSE
CLDN23	0.102864	-0.0636364	FALSE
CLDN3	0.228468	0.605397	FALSE
CLDN4	0.103117	0.448492	FALSE
CLDN5	0.117951	0.659744	FALSE
CLDN7	0.031178	0.804151	FALSE
CLDND1	0.628307	0.485528	FALSE
CLEC11A	-0.0357362	0.654324	FALSE
CLEC12A	0.224674	0.360923	FALSE
CLEC14A	-0.0012077	0.455852	FALSE
CLEC16A	0.459174	0.185585	FALSE
CLEC18B	0.100509	0.6	FALSE
CLEC2B	0.097402	0.782456	FALSE
CLEC3A	0.064513	0.151814	FALSE
CLEC3B	0.477401	0.389378	FALSE
CLEC4A	-0.257319	0.428571	FALSE
CLEC4G	0.0747975	0.226905	FALSE
CLGN	-0.037612	0.638426	FALSE
CLIC2	-0.0852238	0.755538	FALSE
CLIC3	0.191315	0.867548	FALSE
CLIC4	0.407668	0.703842	FALSE
CLIC5	0.0793403	0.661978	TRUE
CLIC6	0.224557	0.907794	FALSE
CLINT1	0.355104	0.676917	FALSE
CLIP1	0.348455	0.881998	TRUE
CLIP2	0.212513	0.738404	FALSE
CLIP4	0.171649	0.447662	FALSE
CLK1	0.279963	0.0599786	FALSE
CLK2	0.781801	0.256934	FALSE
CLK3	0.484447	0.15433	FALSE
CLK4	0.669413	0.113198	FALSE
CLMN	-0.0854956	0.847389	FALSE
CLMP	0.0168697	0.474188	FALSE
CLN3	0.498878	0.130367	FALSE
CLN5	0.768853	0.424163	FALSE
CLN6	0.599434	0.328667	FALSE
CLN8	0.653573	0.396194	FALSE
CLNS1A	0.859875	0.751249	TRUE
CLOCK	0.765184	0.451484	TRUE
CLP1	0.548022	0.133732	TRUE
CLPB	0.842375	0.755924	FALSE
CLPP	0.581736	0.370941	TRUE
CLPTM1	0.58569	0.373959	FALSE
CLPTM1L	0.734452	0.542463	FALSE
CLPX	0.495055	0.418201	TRUE
CLSPN	0.454008	0.263724	FALSE
CLSTN1	0.381727	0.592066	FALSE
CLSTN3	0.515432	0.428571	FALSE
CLTA	0.902605	0.300683	FALSE
CLTB	0.428764	0.848362	FALSE
CLTC	0.676043	0.182567	TRUE
CLTCL1	0.457625	0.155598	FALSE
CLU	0.154374	0.420522	FALSE
CLUAP1	0.160238	0.523927	FALSE
CLUH	0.396587	0.57575	FALSE
CLYBL	0.174668	0.605512	FALSE
CMA1	-0.0061357	0.598148	FALSE
CMAS	0.6314	0.460161	FALSE
CMBL	0.472149	0.466556	FALSE
CMC1	0.344712	0.370182	TRUE
CMC2	0.66441	0.31081	FALSE
CMC4	0.506756	0.412374	FALSE
CMIP	0.419211	0.52287	FALSE
CMKLR1	-0.208025	0.817984	FALSE
CMPK1	0.577502	0.656986	FALSE
CMPK2	-0.0324648	0.925062	FALSE
CMSS1	0.743008	0.687715	FALSE
CMTM3	0.114015	0.648057	FALSE
CMTM4	0.378026	0.650811	FALSE
CMTM6	0.558641	-0.0307448	FALSE
CMTM7	0.412377	0.226554	FALSE
CMTR1	0.657617	0.800996	FALSE
CMTR2	0.653362	0.654287	FALSE
CMYA5	0.136634	0.297196	FALSE
CNBD2	-0.141423	0.0645377	FALSE
CNBP	0.661662	0.617749	FALSE
CNDP1	0.121103	0.0106525	FALSE
CNDP2	0.55032	0.632174	FALSE
CNEP1R1	0.606895	0.427309	FALSE
CNFN	-0.136136	0.406758	FALSE
CNIH1	0.625856	0.169801	FALSE
CNIH4	0.606317	0.248166	FALSE
CNKSR1	0.538754	0.541307	TRUE
CNKSR3	0.434317	0.53551	FALSE
CNN1	0.0497929	0.610864	FALSE
CNN2	0.377219	0.435781	FALSE
CNN3	0.462288	0.602347	TRUE
CNNM2	0.466962	0.0278564	FALSE
CNNM3	0.470743	0.522721	FALSE
CNNM4	0.532049	0.57334	FALSE
CNOT1	0.678174	0.370713	TRUE
CNOT10	0.258242	0.49288	TRUE
CNOT11	0.650197	0.405627	TRUE
CNOT3	0.393509	0.266386	TRUE
CNOT4	0.777457	0.588298	FALSE
CNOT6	0.702338	0.716706	TRUE
CNOT6L	0.440039	0.399465	TRUE
CNOT7	0.810942	0.586724	TRUE
CNOT8	0.765825	0.232278	TRUE
[truncated: 9,124 more rows]

## Sheet: S2F.ccRCC.corr.table
S2F. Spearman's DNA-RNA Corr and RNA-Pro Corr for each gene in ccRCC
gene	DNA-RNA Corr	RNA-Pro Corr	CORUM complex
A1BG	-0.240706	0.0964137	FALSE
A1CF	-0.104983	0.911408	FALSE
A2M	-0.474771	0.00821055	TRUE
A4GALT	0.300378	0.4	FALSE
AAAS	0.639979	0.139412	FALSE
AACS	0.548819	0.585859	FALSE
AADAC	-0.266597	0.4	FALSE
AADAT	0.232191	0.258907	FALSE
AAED1	0.37802	0.0574846	FALSE
AAGAB	0.433379	0.650227	FALSE
AAK1	-0.0199537	0.629728	FALSE
AAMP	0.671596	0.680845	FALSE
AAR2	0.316245	0.421323	FALSE
AARS	0.524696	0.785182	FALSE
AARS2	0.637937	0.52314	FALSE
AARSD1	0.271851	0.625836	FALSE
AASDH	0.637958	-0.29009	FALSE
AASDHPPT	0.316296	0.560245	FALSE
AASS	0.286766	0.394894	FALSE
AATF	0.353303	0.231934	FALSE
ABAT	0.291847	0.225317	FALSE
ABCA1	-0.195175	0.262458	FALSE
ABCA12	0.168645	-0.083871	FALSE
ABCA2	0.0711199	0.260045	FALSE
ABCA3	0.281126	0.333333	FALSE
ABCA5	0.221853	0.048951	FALSE
ABCA6	0.327127	0.818627	FALSE
ABCA8	-0.0634798	0.466827	FALSE
ABCB1	0.0879686	0.743508	TRUE
ABCB10	0.584162	0.350218	FALSE
ABCB5	0.194275	0.170783	FALSE
ABCB6	0.33947	0.709545	FALSE
ABCB7	-0.0833774	0.283446	FALSE
ABCB8	0.311017	0.621351	FALSE
ABCB9	0.566244	0.345455	FALSE
ABCC1	0.326299	0.573988	FALSE
ABCC10	0.140997	0.0226399	FALSE
ABCC2	0.0502289	0.701807	FALSE
ABCC3	0.114414	0.751914	FALSE
ABCC4	0.530362	0.546048	FALSE
ABCC5	0.262094	-0.0287973	FALSE
ABCC6	0.222942	0.606885	FALSE
ABCC9	-0.232372	0.257143	TRUE
ABCD1	0.214195	0.492772	FALSE
ABCD3	0.284524	0.421861	FALSE
ABCE1	0.386377	0.425883	FALSE
ABCF1	0.534328	0.417023	FALSE
ABCF2	0.594444	0.454203	FALSE
ABCF3	0.790355	0.452266	FALSE
ABCG2	0.102198	0.662099	FALSE
ABHD10	0.650469	0.485247	FALSE
ABHD11	0.273456	0.421314	FALSE
ABHD12	0.408731	0.574914	FALSE
ABHD13	0.524383	0.00202429	FALSE
ABHD14A	0.151144	-0.401099	FALSE
ABHD14B	-0.0114001	0.531137	FALSE
ABHD15	0.2926	0.192499	FALSE
ABHD16A	0.711304	0.567519	FALSE
ABHD17A	0.14611	-0.0492402	FALSE
ABHD17B	0.697294	0.346486	FALSE
ABHD17C	0.351328	0.166667	FALSE
ABHD18	0.701037	0.106029	FALSE
ABHD2	0.233392	0.0710784	FALSE
ABHD3	0.164484	0.414655	FALSE
ABHD4	0.571714	0.509591	FALSE
ABHD5	0.3584	0.152427	FALSE
ABHD6	-0.220779	0.684886	FALSE
ABI1	0.439804	-0.00544392	TRUE
ABI2	0.587298	0.633917	FALSE
ABI3	-0.108987	0.690131	TRUE
ABL1	0.4315	0.58964	TRUE
ABL2	0.251125	0.24306	FALSE
ABLIM1	0.243132	0.329766	FALSE
ABLIM2	0.144624	0.385983	FALSE
ABLIM3	0.481405	0.688691	FALSE
ABO	0.327972	0.229683	FALSE
ABR	-0.117464	0.416802	FALSE
ABRACL	0.299572	0.737911	FALSE
ABT1	0.737439	0.0698628	FALSE
ABTB1	0.267573	-0.340049	FALSE
ABTB2	0.243904	0.406768	FALSE
ACAA1	0.242312	0.184422	FALSE
ACAA2	0.361454	0.666722	FALSE
ACACB	0.330165	0.296147	FALSE
ACAD11	0.210127	0.768539	FALSE
ACAD8	0.540482	0.325225	TRUE
ACAD9	0.811756	0.518163	FALSE
ACADL	0.136351	0.622426	FALSE
ACADM	0.377256	0.462812	FALSE
ACADS	0.287826	0.564461	FALSE
ACADSB	0.291071	0.327004	FALSE
ACADVL	0.516222	0.49342	FALSE
ACAN	-0.156469	0.66996	FALSE
ACAP1	0.190403	0.611632	TRUE
ACAP2	0.383438	0.603327	FALSE
ACAP3	0.413599	0.218056	FALSE
ACAT1	0.507161	0.41808	FALSE
ACAT2	0.523426	0.486517	FALSE
ACBD3	0.651031	0.456028	FALSE
ACBD4	0.259201	0.344648	FALSE
ACBD5	0.708045	0.28999	FALSE
ACBD6	0.607058	0.471513	FALSE
ACBD7	0.000336022	0.0721805	FALSE
ACCS	0.116712	0.164353	FALSE
ACD	0.440979	-0.189916	TRUE
ACE	0.0662353	0.598703	FALSE
ACE2	0.225118	0.800185	FALSE
ACHE	0.046093	-0.0666667	FALSE
ACIN1	0.732366	0.31675	TRUE
ACLY	0.368834	0.561561	FALSE
ACMSD	0.167767	0.469586	FALSE
ACO1	0.333613	0.445362	FALSE
ACO2	0.470359	0.590436	FALSE
ACOT1	0.552699	0.343906	FALSE
ACOT11	-0.0113287	0.512436	FALSE
ACOT13	0.684501	0.237763	FALSE
ACOT2	0.580123	0.406024	FALSE
ACOT4	0.465619	0.418006	FALSE
ACOT7	0.291896	0.0833333	FALSE
ACOT8	0.4334	0.419192	FALSE
ACOT9	0.136625	0.115003	FALSE
ACOX1	0.4482	0.153915	FALSE
ACOX2	-0.0329994	0.0922713	FALSE
ACOX3	0.40953	0.426448	FALSE
ACP1	0.379689	0.297757	FALSE
ACP2	0.0638278	0.528264	FALSE
ACP5	-0.232022	0.729321	FALSE
ACP6	0.321508	0.326374	FALSE
ACPP	0.209017	0.256501	FALSE
ACSF2	-0.109863	0.428922	FALSE
ACSF3	0.632613	0.61783	FALSE
ACSL1	0.339578	0.459614	FALSE
ACSL3	0.333736	0.449921	FALSE
ACSL4	0.0706731	0.697822	FALSE
ACSL5	0.177839	0.881086	FALSE
ACSM2A	0.163599	0.351867	FALSE
ACSM2B	0.101785	0.441905	FALSE
ACSM3	0.44776	0.288018	FALSE
ACSM4	-0.19576	0.0391129	FALSE
ACSM5	0.288382	0.773441	FALSE
ACSS1	0.263686	0.464248	FALSE
ACSS2	0.210554	0.648429	FALSE
ACSS3	0.10594	0.419053	FALSE
ACTA1	0.160317	0.0601597	FALSE
ACTA2	-0.107239	0.371689	TRUE
ACTB	-0.0148398	0.227013	TRUE
ACTBL2	0.192128	0.17736	FALSE
ACTG1	0.238599	0.110509	TRUE
ACTL6A	0.584475	0.349171	TRUE
ACTL8	-0.00335337	0.304804	FALSE
ACTN1	0.0168421	0.275946	TRUE
ACTN2	0.102862	0.264252	FALSE
ACTN4	0.080931	0.135826	TRUE
ACTR10	0.665591	0.307905	FALSE
ACTR1A	0.345375	0.533472	FALSE
ACTR1B	0.450281	0.56966	FALSE
ACTR3	0.45702	0.455685	TRUE
ACTR3B	0.746937	0.365422	FALSE
ACTR5	0.21394	0.275526	TRUE
ACTR6	0.319886	-0.214234	TRUE
ACTR8	0.405782	0.41302	TRUE
ACTRT1	-0.0514606	0.101906	FALSE
ACVR1	0.328458	0.332307	FALSE
ACVR1B	0.535325	0.277692	FALSE
ACVR1C	-0.0893314	0	FALSE
ACY1	-0.0600316	0.296655	FALSE
ACY3	0.192912	0.686368	FALSE
ACYP1	0.381517	0.393272	FALSE
ACYP2	0.30609	0.610499	FALSE
ADA	0.211636	0.749541	TRUE
ADAL	0.430311	0.569641	FALSE
ADAM10	0.382463	0.194505	FALSE
ADAM15	0.139684	0.334975	TRUE
ADAM17	0.372596	0.294384	FALSE
ADAM22	0.466017	0.289037	TRUE
ADAM28	0.0275119	0.4	FALSE
ADAM8	0.0707418	0.8	TRUE
ADAM9	0.52942	0.488101	TRUE
ADAMDEC1	-0.262039	0.283906	FALSE
ADAMTS1	-0.0231855	0.176517	FALSE
ADAMTS13	0.400393	0.23515	FALSE
ADAMTS15	-0.185937	0.0144144	FALSE
ADAMTS2	0.0285129	0.516923	FALSE
ADAMTS4	0.0803279	0.484127	FALSE
ADAMTS5	-0.128792	-0.00776915	FALSE
ADAMTS7	-0.226877	0.364862	FALSE
ADAMTSL1	0.313847	0.563214	FALSE
ADAMTSL2	0.171853	0.489667	FALSE
ADAMTSL3	-0.0685897	0.372081	FALSE
ADAMTSL4	0.205605	0.553461	FALSE
ADAMTSL5	0.16076	0.340302	FALSE
ADAP1	0.0525167	0.611593	FALSE
ADAP2	-0.0743346	0.727408	FALSE
ADAR	0.706681	0.328644	TRUE
ADARB1	-0.0979263	0.641299	FALSE
ADAT1	0.526143	0.398345	FALSE
ADAT2	0.392011	0.401904	FALSE
ADAT3	0.200656	0.0499515	FALSE
ADCK1	0.186357	0.388917	FALSE
ADCK2	0.622855	0.153021	FALSE
ADCK5	0.382212	0.0681825	FALSE
ADCY3	0.219372	0.10989	FALSE
ADCY5	0.142984	0.462451	FALSE
ADCY6	0.400846	0.350279	FALSE
ADCY9	0.32428	0.383338	FALSE
ADD1	0.322671	0.160357	FALSE
ADD2	0.0636124	0.0916753	TRUE
ADD3	0.198352	0.479983	FALSE
ADGRA2	-0.0615344	0.75749	FALSE
ADGRE2	-0.0626448	0.491101	FALSE
ADGRE5	0.0884041	0.562849	FALSE
ADGRF1	-0.312031	0.221625	FALSE
ADGRF5	0.20979	0.877639	FALSE
ADGRG1	0.364319	0.579659	TRUE
ADGRG5	0.096613	0.277778	FALSE
ADGRG6	0.206042	0.552401	FALSE
ADGRL1	-0.107484	-0.4	FALSE
ADGRL2	0.193596	0.575693	FALSE
ADGRL4	0.0441628	0.773951	FALSE
ADGRV1	0.225136	0.166417	FALSE
ADH1A	0.217982	0.0490409	FALSE
ADH1B	0.153562	0.513595	FALSE
ADH1C	0.253367	0.364073	FALSE
ADH4	0.189852	-0.0265937	FALSE
ADH5	0.419739	0.639802	FALSE
ADH6	0.103015	0.305829	FALSE
ADHFE1	0.242821	0.242202	FALSE
ADI1	0.224298	0.51934	FALSE
ADIPOQ	-0.0392663	0.0610003	TRUE
ADIPOR1	0.686357	-0.0551573	FALSE
ADIPOR2	0.434484	0.4	FALSE
ADIRF	-0.0538462	0.930933	FALSE
ADK	0.416091	0.669122	FALSE
ADM	0.19278	0.125275	FALSE
ADNP	0.516831	0.427356	FALSE
ADNP2	0.524728	0.0363801	FALSE
ADO	0.568269	0.368363	FALSE
ADPGK	0.353114	0.531146	FALSE
ADPRH	-0.138179	0.606431	FALSE
ADPRHL2	0.514652	0.644528	FALSE
ADPRM	0.190793	0.373529	FALSE
ADRA2A	-0.147117	0.355385	TRUE
ADRM1	0.450759	0.257242	FALSE
ADSL	0.289613	0.4048	FALSE
ADSS	0.351899	0.606598	FALSE
ADSSL1	0.470267	0.890233	FALSE
AEBP1	0.252629	0.555129	FALSE
AEBP2	0.455114	0.00699301	TRUE
AES	0.219668	0.320387	FALSE
AFAP1	0.190678	0.684422	FALSE
AFAP1L1	-0.0268483	0.803549	FALSE
AFAP1L2	-0.0586081	0.441157	FALSE
AFDN	0.708197	0.0336735	FALSE
AFF1	0.32761	0.514958	TRUE
AFF4	0.551732	0.262978	TRUE
AFG3L2	0.589235	0.56359	TRUE
AFM	-0.0546537	0.0684885	FALSE
AFMID	0.375013	0.453591	FALSE
AFTPH	0.255248	0.813437	FALSE
AGA	0.418011	0.496497	FALSE
AGAP1	0.416801	0.586322	FALSE
AGAP2	0.137546	0.309524	FALSE
AGAP3	0.473216	0.600371	FALSE
AGFG1	0.461804	0.610008	FALSE
AGFG2	0.0496387	0.614707	FALSE
AGGF1	0.590436	-0.0196892	FALSE
AGK	0.687998	0.253081	FALSE
AGL	0.406319	0.516264	FALSE
AGMAT	0.209719	0.349004	FALSE
AGO1	0.265797	0.191131	FALSE
AGO2	0.36061	0.266444	TRUE
AGO3	0.527701	0.172384	FALSE
AGPAT1	0.493748	0.404559	FALSE
AGPAT2	0.327962	0.564644	FALSE
AGPAT3	0.39795	0.628885	FALSE
AGPAT4	0.465759	0.403486	FALSE
AGPAT5	0.640555	0.347197	FALSE
AGPS	0.309536	0.282569	TRUE
AGR2	-0.0403846	0.388947	FALSE
AGR3	0.103886	0.181681	FALSE
AGRN	0.123995	0.135539	FALSE
AGT	0.155099	-0.0680104	TRUE
AGTPBP1	0.0777952	0.567624	FALSE
AGTR1	-0.0976526	0.657343	FALSE
AGTRAP	0.446474	0.316667	FALSE
AGXT	0.114773	-0.12244	FALSE
AGXT2	0.174054	0.530136	FALSE
AHCTF1	0.688545	0.173561	FALSE
AHCY	0.19357	-0.30668	FALSE
AHCYL1	0.386218	0.516319	FALSE
AHCYL2	0.276536	0.0493972	FALSE
AHDC1	0.238986	0.310333	FALSE
AHNAK	0.287693	0.755426	TRUE
AHNAK2	0.00339029	0.799629	FALSE
AHR	0.243354	0.846196	TRUE
AHSA1	0.421353	0.619859	FALSE
AHSG	0.370302	-0.400396	FALSE
AHSP	-0.0208728	0.285398	FALSE
AIDA	0.435565	0.167158	FALSE
AIF1	0.080764	0.786748	FALSE
AIF1L	0.142841	0.620712	FALSE
AIFM1	-0.0625437	0.600102	TRUE
AIFM2	0.240399	0.539218	FALSE
AIG1	0.544736	0.686461	FALSE
AIMP1	0.432124	0.300398	TRUE
AIMP2	0.312896	0.0769231	TRUE
AIP	0.258241	0.468724	FALSE
AJAP1	-0.00380037	0.684163	FALSE
AJUBA	0.469352	0.462123	TRUE
AK1	0.38722	0.489083	FALSE
AK2	0.493925	0.238588	FALSE
AK3	0.747834	0.464035	FALSE
AK4	0.434092	0.539246	FALSE
AK5	0.0848694	0.9	FALSE
AK6	0.416956	0.425123	FALSE
AK7	0.302277	0.416339	FALSE
AK9	0.420892	-0.398701	FALSE
AKAP1	0.320906	0.710472	TRUE
AKAP10	0.595618	0.320248	FALSE
AKAP11	0.632784	0.249069	FALSE
AKAP12	0.243196	0.825484	FALSE
AKAP13	0.213899	0.408322	TRUE
AKAP17A	0.65438	0.524493	FALSE
AKAP5	0.120711	0.56898	TRUE
AKAP7	0.342532	0.368613	FALSE
AKAP8	0.464482	0.460819	FALSE
AKAP8L	0.244546	0.240033	TRUE
AKAP9	0.734722	0.430289	TRUE
AKNA	-0.176288	0.320354	FALSE
AKR1A1	0.291529	0.677073	FALSE
AKR1B1	0.0695138	0.891576	FALSE
AKR1B10	0.057211	0.461448	FALSE
AKR1B15	0.0556933	-0.0867493	FALSE
AKR1C1	-0.112821	0.718321	FALSE
AKR1C2	0.0146062	0.815504	FALSE
AKR1C3	0.192628	0.844166	FALSE
AKR1C4	0.0870421	0.155951	FALSE
AKR7A2	0.58169	0.799222	FALSE
AKR7A3	0.408891	0.670262	FALSE
AKT1	0.691155	0.656232	TRUE
AKT2	0.12653	0.299481	TRUE
AKT3	-0.0317358	0.821731	FALSE
AKTIP	0.493595	0.554508	TRUE
ALAD	0.547936	0.15335	FALSE
ALAS1	0.395508	0.214317	FALSE
ALB	-0.014011	0.0544157	FALSE
ALCAM	0.35559	0.680762	FALSE
ALDH16A1	0.202273	0.4493	FALSE
ALDH18A1	0.386493	0.398393	FALSE
ALDH1A1	0.115013	0.775276	FALSE
ALDH1A2	0.152928	0.495061	FALSE
ALDH1A3	0.174388	0.756204	FALSE
ALDH1B1	0.323164	0.358947	FALSE
ALDH1L1	0.232847	0.841442	FALSE
ALDH1L2	0.225605	0.712418	FALSE
ALDH2	0.18366	0.575665	FALSE
ALDH3A1	0.270892	0.129032	FALSE
ALDH3A2	0.490662	0.545853	FALSE
ALDH3B1	-0.186248	0.731211	FALSE
ALDH5A1	0.299572	0.596293	FALSE
ALDH6A1	0.514969	0.267362	FALSE
ALDH8A1	0.139955	0.792475	FALSE
ALDH9A1	0.288661	0.737318	FALSE
ALDOA	0.558238	0.238095	FALSE
ALDOB	0.363858	0.235817	FALSE
ALDOC	0.293519	0.877379	FALSE
ALG1	0.651566	0.482356	FALSE
ALG10B	0.296087	-0.0348132	FALSE
ALG11	0.618452	0.459837	FALSE
ALG12	0.391268	0.14197	FALSE
ALG13	0.222028	-0.0740617	FALSE
ALG14	0.325229	0.387591	FALSE
ALG2	0.727946	0.744176	FALSE
ALG3	0.698908	0.567726	FALSE
ALG5	0.493773	0.363442	FALSE
ALG6	0.537586	0.335585	FALSE
ALG8	0.496448	0.368712	FALSE
ALG9	0.625721	0.290899	FALSE
ALKAL2	0.0728316	-0.3	FALSE
ALKBH1	0.782967	0.241896	FALSE
ALKBH2	0.113815	0.260724	FALSE
ALKBH3	0.344872	0.2866	FALSE
ALKBH4	0.601423	0.467918	FALSE
ALKBH5	0.50377	0.521981	FALSE
ALKBH6	0.303664	0.0392679	FALSE
ALKBH7	0.292976	0.237188	FALSE
ALKBH8	0.23663	0.309237	FALSE
ALMS1	0.376247	0.316532	FALSE
ALOX15B	-0.0351114	0.527473	FALSE
ALOX5	0.108026	0.858753	FALSE
ALOX5AP	-0.0139652	0.671205	FALSE
ALPI	0.171365	0.798987	FALSE
ALPK1	0.521553	0.531239	FALSE
ALPK2	0.31202	0.66554	FALSE
ALPL	0.283462	0.822973	FALSE
ALS2	0.716533	0.386396	FALSE
ALS2CL	0.591332	0.173358	FALSE
ALYREF	0.328159	0.200269	TRUE
AMACR	0.191588	0.539273	FALSE
AMBP	0.36445	-0.00195533	FALSE
AMBRA1	0.515797	-0.0741703	FALSE
AMD1	0.275524	0.319902	FALSE
AMDHD1	-0.209992	0.816291	FALSE
AMDHD2	0.283643	0.431092	FALSE
AMER1	0.163564	0.1	FALSE
AMFR	0.609289	0.31928	TRUE
AMIGO2	-0.122158	0.293706	FALSE
AMMECR1L	0.627705	0.15	FALSE
AMN	0.366765	0.559235	TRUE
AMN1	0.202793	0.163506	FALSE
AMOT	0.200568	0.28516	TRUE
AMOTL1	0.254877	0.656306	TRUE
AMOTL2	0.411603	0.298527	TRUE
AMPD2	0.247848	0.46422	FALSE
AMPD3	0.0810772	0.716032	FALSE
AMPH	-0.0124878	0.335247	FALSE
AMT	-0.0756601	0.502623	FALSE
AMY2A	-0.0743334	-0.122837	FALSE
AMZ2	0.575785	0.306065	FALSE
ANAPC1	0.474293	0.215615	TRUE
ANAPC10	0.675259	-0.041618	TRUE
ANAPC11	0.348031	0.0809859	FALSE
ANAPC13	0.578873	0.396645	FALSE
ANAPC15	0.147269	-0.426573	FALSE
ANAPC16	0.604263	0.479325	FALSE
ANAPC2	0.707399	0.130924	TRUE
ANAPC4	0.439015	0.1885	TRUE
ANAPC5	0.658794	0.0655176	TRUE
ANAPC7	0.594998	0.227495	TRUE
ANG	0.41888	0.00639422	TRUE
ANGEL1	0.56555	0.307882	FALSE
ANGEL2	0.6	0.282003	FALSE
ANGPT1	-0.426411	0.132411	FALSE
ANGPT2	-0.219437	0.755231	FALSE
ANGPTL1	-0.123868	-0.107692	FALSE
ANGPTL2	0.0600069	0.585812	FALSE
ANGPTL3	0.240303	0.373617	FALSE
ANGPTL4	0.207891	0.665721	TRUE
ANGPTL6	0.0790523	-0.0295023	FALSE
ANGPTL8	0.199499	0.370565	FALSE
ANK1	0.152655	-0.209524	FALSE
ANK2	-0.107143	0.534918	FALSE
ANK3	0.00998464	0.6453	TRUE
ANKDD1A	0.110348	0.45	FALSE
ANKFY1	0.355901	0.412035	FALSE
ANKHD1	0.653191	0.50818	FALSE
ANKIB1	0.356929	0.758401	FALSE
ANKLE2	0.38274	0.535177	FALSE
ANKMY2	0.666091	0.69279	FALSE
ANKRA2	0.453704	0.8	TRUE
ANKRD10	0.631056	0.335557	FALSE
ANKRD11	0.439289	-0.0392287	TRUE
ANKRD12	0.69434	-0.188854	FALSE
ANKRD13A	0.289411	0.808989	FALSE
ANKRD13C	0.614744	-0.9	FALSE
ANKRD13D	-0.062056	0.472795	FALSE
ANKRD16	0.327427	0.408294	FALSE
ANKRD17	0.67848	0.354305	FALSE
ANKRD2	0.223718	0.393736	FALSE
ANKRD22	0.0574176	0.510567	FALSE
ANKRD26	0.504176	0.121576	FALSE
ANKRD27	0.230435	0.240098	FALSE
ANKRD28	0.349394	0.155318	TRUE
ANKRD29	0.31954	0.305495	FALSE
ANKRD31	0.144435	-0.00103199	FALSE
ANKRD36	0.284984	-0.0807692	FALSE
ANKRD39	0.509353	0.308844	FALSE
ANKRD40	0.382653	0.304206	FALSE
ANKRD44	0.0698575	0.789148	FALSE
ANKRD45	0.328091	0.573626	FALSE
ANKRD46	0.321365	-0.0698249	FALSE
ANKRD49	0.527809	0.0891929	FALSE
ANKRD50	0.200962	0.415998	FALSE
ANKRD52	0.548228	0.188597	FALSE
ANKRD54	0.367599	0.264758	FALSE
ANKRD6	0.462893	0.632272	FALSE
ANKS1A	0.294353	0.280317	FALSE
ANKS3	0.415328	0.402993	FALSE
ANKS4B	0.173136	0.800547	FALSE
ANKS6	0.586021	0.298443	TRUE
ANKZF1	0.330885	0.682031	FALSE
ANLN	0.254196	0.330827	FALSE
ANO1	-0.0393557	0.596554	FALSE
ANO10	0.352678	0.572486	FALSE
ANO5	0.0159905	0.117004	FALSE
ANO6	0.376467	0.126316	FALSE
ANO8	0.14034	0.586325	FALSE
ANO9	0.342834	0.484416	FALSE
ANOS1	-0.0856413	0.47193	TRUE
ANP32A	0.519139	0.455009	TRUE
ANP32B	0.117227	0.275989	TRUE
ANP32E	0.416816	0.232405	FALSE
ANPEP	-0.0850087	0.382699	FALSE
ANTXR1	-0.0144465	0.784042	FALSE
ANTXR2	0.266941	0.535134	FALSE
ANXA1	0.0390121	0.789732	FALSE
ANXA11	0.441163	0.697211	FALSE
ANXA13	0.119624	0.901205	FALSE
ANXA2	0.129075	0.532036	TRUE
ANXA3	0.296658	0.752748	FALSE
ANXA4	0.237489	0.542072	FALSE
ANXA5	-0.0891897	0.41606	FALSE
ANXA6	0.177905	0.717431	TRUE
ANXA7	0.508737	0.541294	TRUE
ANXA8	0.366021	0.420106	FALSE
ANXA8L1	0.131602	0.651678	FALSE
ANXA9	0.118866	0.363405	FALSE
AOAH	-0.176957	0.688561	FALSE
AOC1	-0.149413	0.823909	FALSE
AOC3	0.110949	0.791113	FALSE
AOX1	0.15228	0.739385	FALSE
AP1AR	0.433084	0.598378	TRUE
AP1B1	0.0113753	-0.00246502	TRUE
AP1G1	0.752171	0.600297	TRUE
AP1G2	0.684917	0.342007	TRUE
AP1M1	0.323453	0.683333	TRUE
AP1M2	-0.038806	0.166667	TRUE
AP1S1	0.372109	0.399759	TRUE
AP1S2	-0.0690398	0.548021	TRUE
AP1S3	0.388598	0.755157	TRUE
AP2A1	0.226005	0.408127	TRUE
AP2A2	0.205447	0.073594	FALSE
AP2B1	0.216449	0.219044	FALSE
AP2M1	0.654696	0.271467	FALSE
AP2S1	-0.00664336	0.0113984	FALSE
AP3B1	0.670077	0.441887	TRUE
AP3B2	0.0767399	0.588795	TRUE
AP3D1	0.112201	0.275109	TRUE
AP3M1	0.570276	0.347447	TRUE
AP3M2	0.661832	0.372125	TRUE
AP3S1	0.581699	0.528107	TRUE
AP3S2	0.348689	0.104651	TRUE
AP4B1	0.465156	0.020186	TRUE
AP4E1	0.449405	0.310852	TRUE
AP4M1	0.610885	0.049254	TRUE
AP4S1	0.805878	0.611148	TRUE
AP5B1	0.176032	0.303512	TRUE
AP5M1	0.489542	0.323103	TRUE
AP5S1	0.525755	0.0689185	TRUE
AP5Z1	0.454851	0.187527	TRUE
APAF1	0.40208	0.418089	TRUE
APBA1	0.107608	0.606676	TRUE
APBA3	0.402275	0.282819	FALSE
APBB1	0.317469	0.444797	TRUE
APBB1IP	0.104407	0.739635	TRUE
APBB2	0.132199	0.830359	FALSE
APC	0.472279	0.468132	TRUE
APCS	0.258483	0.217617	FALSE
APEH	0.313612	0.35335	FALSE
APEX1	0.371462	0.48672	TRUE
APEX2	0.290131	0.152125	FALSE
APH1A	0.416922	0.119028	TRUE
API5	0.476511	0.00835378	TRUE
APIP	0.358679	0.534019	FALSE
APLF	0.350387	0.370767	FALSE
APLP2	0.29346	0.662849	FALSE
APMAP	0.433715	0.637615	FALSE
APOA1	0.28643	0.170508	TRUE
APOA2	0.125362	-0.0435744	FALSE
APOA4	0.0115502	0.053815	FALSE
APOA5	0.199954	-0.0458578	FALSE
APOB	0.15562	-0.0815031	FALSE
APOBEC3B	0.131847	-0.558824	FALSE
APOBEC3C	-0.0516853	0.637615	FALSE
APOBEC3D	0.161812	1	FALSE
APOBEC3F	0.110891	0.390889	FALSE
APOBEC3G	-0.0984464	0.84539	FALSE
APOBR	0.148433	0.724632	FALSE
APOC1	-0.0486014	0.0259661	FALSE
APOC2	0.107386	-0.0934019	FALSE
APOC3	0.00791254	0.0575925	FALSE
APOC4	-0.0858829	-0.0504391	FALSE
APOD	0.0953351	-0.0304142	FALSE
APOE	-0.157474	0.307441	FALSE
APOF	-0.0127011	-0.015296	FALSE
APOH	-0.0243403	-0.174362	FALSE
APOL1	-0.0163759	0.250431	TRUE
APOL2	0.143108	0.861097	FALSE
APOL3	0.0138184	0.776425	FALSE
APOL6	0.119861	0.758468	FALSE
APOM	0.130195	-0.0767862	FALSE
APOO	-0.0860244	0.599398	TRUE
APOOL	0.0603938	0.426828	TRUE
APOPT1	0.644198	-0.167179	FALSE
APP	0.526354	0.524622	TRUE
APPBP2	0.507776	0.181818	FALSE
APPL1	0.0666493	0.563349	TRUE
APPL2	0.41034	0.602252	FALSE
APRT	0.694126	0.637077	FALSE
APTX	0.798465	0.371393	FALSE
AQP1	-0.146484	0.70796	TRUE
AQP2	0.00545327	0.0533458	FALSE
AQP3	-0.0920351	0.525692	FALSE
AQP7	0.195177	-0.0529412	FALSE
AQR	0.619668	0.274497	TRUE
AR	0.0424819	0.659425	TRUE
ARAF	0.195498	0.402595	TRUE
ARAP1	0.225064	0.533741	FALSE
ARAP2	0.389124	0.118762	FALSE
ARAP3	-0.0452507	0.872662	FALSE
ARCN1	0.567928	0.384292	FALSE
ARF1	0.474405	0.0312979	TRUE
ARF3	0.571761	0.419308	FALSE
ARF4	0.461366	0.705023	FALSE
ARF5	0.545799	0.445733	FALSE
ARF6	0.358031	0.437541	FALSE
ARFGAP2	0.539332	0.196979	FALSE
ARFGAP3	0.459862	0.646113	FALSE
ARFGEF1	0.773753	0.649995	FALSE
ARFGEF2	0.546124	0.639375	FALSE
ARFGEF3	0.274522	0.895144	FALSE
ARFIP1	0.754896	0.4597	FALSE
ARFIP2	0.485684	0.415152	TRUE
ARFRP1	0.365451	0.228681	FALSE
ARG1	0.398977	0.126383	FALSE
ARG2	0.119398	0.745093	FALSE
ARGLU1	0.621438	0.336799	FALSE
ARHGAP1	0.134753	0.470967	FALSE
ARHGAP10	0.208189	0.645695	TRUE
ARHGAP12	0.323412	0.518505	FALSE
ARHGAP15	0.058787	0.684367	FALSE
ARHGAP17	0.240096	0.26261	TRUE
ARHGAP18	0.292433	0.759012	FALSE
ARHGAP21	0.326133	0.372588	FALSE
ARHGAP22	0.360073	0.540903	FALSE
ARHGAP23	-0.0750444	0.170013	FALSE
ARHGAP24	0.257601	0.124132	FALSE
ARHGAP25	0.181459	0.52381	FALSE
ARHGAP26	0.334818	0.860133	FALSE
ARHGAP27	0.160797	0.496988	FALSE
ARHGAP28	0.325798	0.684034	FALSE
ARHGAP29	0.330586	0.736308	FALSE
ARHGAP30	0.154363	0.810833	FALSE
ARHGAP31	0.185861	0.725503	FALSE
ARHGAP32	0.477421	0.570624	FALSE
ARHGAP35	0.37347	0.583338	FALSE
ARHGAP39	0.311713	-0.8	FALSE
ARHGAP4	0.0679052	0.788398	FALSE
ARHGAP42	0.421041	0.685692	FALSE
ARHGAP44	-0.137084	0.493675	FALSE
ARHGAP45	-0.129895	0.56258	FALSE
ARHGAP5	0.662365	0.751775	FALSE
ARHGAP6	-0.29324	0.667779	FALSE
ARHGAP8	0.141963	0.645445	FALSE
ARHGAP9	-0.153834	0.75967	FALSE
ARHGDIA	0.189789	0.113354	FALSE
ARHGDIB	-0.392445	0.738282	FALSE
ARHGEF1	0.0297203	0.474145	TRUE
ARHGEF10	0.522732	0.769716	FALSE
ARHGEF10L	0.192074	0.558465	FALSE
ARHGEF11	0.255632	0.566667	FALSE
ARHGEF12	0.422758	0.4	FALSE
ARHGEF15	0.0742419	0.513419	FALSE
ARHGEF16	0.354212	0.864637	FALSE
ARHGEF17	0.217888	0.711454	FALSE
ARHGEF18	0.206847	0.499083	TRUE
ARHGEF2	-0.128926	0.60341	TRUE
ARHGEF25	-0.281386	0.7	TRUE
ARHGEF28	0.549345	0.77623	FALSE
ARHGEF3	0.510424	-0.0333333	FALSE
ARHGEF35	0.13033	0.529981	FALSE
ARHGEF37	0.170399	0.801761	FALSE
ARHGEF40	0.348473	0.697646	FALSE
ARHGEF5	0.349887	0.660198	FALSE
ARHGEF6	-0.167351	0.636095	TRUE
ARHGEF7	0.519555	0.561144	TRUE
ARHGEF9	-0.26917	0.383932	FALSE
ARID1A	-0.0778846	0.152831	TRUE
ARID1B	0.558983	0.57586	TRUE
ARID2	0.546801	0.341405	TRUE
ARID3A	0.231512	0.172048	FALSE
ARID4A	0.512837	0.607173	TRUE
ARID4B	0.47504	0.559522	TRUE
ARID5B	0.343361	0.240647	FALSE
ARIH1	0.682647	0.226763	FALSE
ARIH2	0.57097	0.428369	FALSE
ARL1	0.612198	0.436429	TRUE
ARL10	0.295362	0.405573	FALSE
ARL11	-0.100183	0.1	FALSE
ARL13B	0.661234	0.213846	FALSE
ARL14EP	0.291475	0.266518	FALSE
ARL15	0.0924324	0.706589	FALSE
ARL16	0.248626	-0.021978	FALSE
ARL2	0.11226	0.492216	TRUE
ARL2BP	0.587257	0.418747	FALSE
ARL3	0.562271	0.762024	FALSE
ARL4C	0.257847	0.672422	FALSE
ARL5A	0.352568	0.209222	FALSE
ARL5B	0.500864	0.400528	FALSE
ARL6	0.614438	0.502251	FALSE
ARL6IP1	0.394328	0.613724	FALSE
ARL6IP4	0.231663	0.279004	FALSE
ARL6IP5	0.475098	0.543963	FALSE
ARL6IP6	0.489703	0.254852	FALSE
ARL8A	0.317866	0.42263	FALSE
ARL8B	0.505923	0.498536	FALSE
ARMC1	0.715311	0.34121	FALSE
ARMC10	0.701942	0.117265	FALSE
ARMC5	0.506726	-0.164016	FALSE
ARMC6	0.247051	0.540673	FALSE
ARMC7	0.0807223	0.431373	FALSE
ARMC8	0.712173	0.409017	TRUE
ARMC9	0.436888	0.588848	FALSE
ARMCX1	-0.0504371	0.182828	FALSE
ARMCX2	-0.229764	0.315068	FALSE
ARMCX3	0.19493	0.295765	FALSE
ARMCX5	0.217483	0.00230513	FALSE
ARMCX6	-0.171897	0.169142	FALSE
ARMT1	0.527177	0.617765	FALSE
ARNT	0.457589	-0.0604396	TRUE
ARNT2	0.287454	0.433489	FALSE
ARNTL	0.3149	0.128689	TRUE
ARPC1A	0.729977	0.153952	FALSE
ARPC1B	0.107324	0.560893	TRUE
ARPC2	0.56385	0.643722	TRUE
ARPC3	0.356375	0.390196	TRUE
ARPC4	0.551037	0.330192	TRUE
ARPC5	0.179161	0.530247	TRUE
ARPC5L	0.380453	0.567946	FALSE
ARPIN	0.2809	0.42081	FALSE
ARPP19	0.66131	0.485747	FALSE
ARPP21	-0.0194413	1	FALSE
ARRB1	-0.0755812	0.645714	TRUE
ARRB2	-0.0186701	0.57295	TRUE
ARRDC1	0.41811	0.409619	FALSE
ARSA	0.142126	0.595746	FALSE
ARSB	0.295742	0.718905	FALSE
ARSD	0.097589	0.630284	FALSE
ARSE	0.22672	0.519729	FALSE
ARSF	-0.0579689	0.328255	FALSE
ARSK	0.520554	0.492395	FALSE
ART3	0.235633	0.0440692	FALSE
ART4	-0.16685	0.340351	FALSE
ARV1	0.431898	0.0485348	FALSE
ARVCF	0.169356	0.731953	FALSE
AS3MT	0.314286	0.865434	FALSE
ASAH1	0.416259	0.610648	TRUE
ASAP1	0.215865	0.693096	TRUE
ASAP2	-0.0349213	0.857143	FALSE
ASAP3	-0.0110544	0.421362	FALSE
ASB1	0.708249	0.215385	TRUE
ASB13	0.144551	0.507015	FALSE
ASB6	0.477268	0.194872	TRUE
ASB9	0.0167611	0.399083	TRUE
ASCC1	0.692396	0.111908	TRUE
ASCC2	0.433027	0.0947549	TRUE
ASCC3	0.561058	0.623668	TRUE
ASF1A	0.494056	0.318932	TRUE
ASF1B	0.0818495	0.329231	TRUE
ASGR1	-0.01817	0.4	FALSE
ASGR2	0.0807726	0.0645653	FALSE
ASH1L	0.465891	0.0646154	FALSE
ASH2L	0.806386	0.43502	TRUE
ASL	0.394022	0.80127	FALSE
ASMTL	0.560133	0.64779	FALSE
ASNA1	0.103142	0.370948	FALSE
ASNS	0.513283	0.61201	FALSE
ASNSD1	0.564414	0.174407	FALSE
ASPA	0.394227	0.829441	FALSE
ASPDH	-0.020236	0.236076	FALSE
ASPG	0.229829	0.800862	FALSE
ASPH	0.583693	0.71593	FALSE
ASPHD2	0.0882926	0.547619	FALSE
ASPM	0.349097	-0.0156522	FALSE
ASPN	-0.068443	0.67257	FALSE
ASPSCR1	0.294493	0.268038	FALSE
ASRGL1	0.0531567	0.916115	FALSE
ASS1	0.0709242	0.303021	FALSE
ASTE1	0.778989	0.8	FALSE
ASTN2	0.605517	0.438477	FALSE
ASXL2	0.121997	0.0864111	FALSE
ASXL3	0.436806	-0.0879121	FALSE
ATAD1	0.650137	0.295904	FALSE
ATAD2	0.405813	0.232461	FALSE
ATAD2B	0.397933	0.296241	FALSE
ATAD3A	0.308471	0.531146	FALSE
ATAD3B	0.204121	-0.273684	FALSE
ATAD5	0.22292	-0.595238	FALSE
ATE1	0.647482	0.513508	FALSE
ATF1	0.189212	0.411713	FALSE
ATF2	0.692695	0.394885	TRUE
ATF3	0.0246735	0.71978	FALSE
ATF6	0.492491	0.0989499	FALSE
ATF7	0.447805	0.235882	FALSE
ATF7IP	0.294231	0.502456	TRUE
ATG10	0.405556	0.904762	FALSE
ATG101	0.621206	0.225957	TRUE
ATG12	0.633521	0.101131	FALSE
ATG13	0.467079	0.4	TRUE
ATG14	0.706001	0.361931	TRUE
ATG16L1	0.509088	0.0782258	TRUE
ATG16L2	0.0990953	0.595238	FALSE
ATG2A	0.241639	0.116217	FALSE
ATG2B	0.799805	0.685627	FALSE
ATG3	0.70771	0.654027	FALSE
ATG4A	-0.0998252	0.193652	FALSE
ATG4B	0.534272	0.430711	FALSE
ATG4C	0.3798	0.501275	FALSE
ATG5	0.604983	0.426411	FALSE
ATG7	0.570202	0.771801	FALSE
ATG9A	0.431891	0.459716	FALSE
ATIC	0.321294	0.425336	FALSE
ATL1	0.364238	0.724641	TRUE
ATL2	0.318182	0.302571	TRUE
ATL3	0.132617	0.372718	TRUE
ATM	0.341176	0.559355	TRUE
ATN1	0.390691	0.370501	FALSE
ATOX1	0.454834	0.716477	FALSE
ATP10D	0.422357	-0.124871	FALSE
ATP11A	0.55992	0.697924	FALSE
ATP11B	0.642355	0.490075	FALSE
ATP11C	-0.00301573	0.0462748	FALSE
ATP13A1	-0.00523954	0.337105	FALSE
ATP13A2	0.348112	0.000772201	FALSE
ATP13A3	0.454554	0.586535	FALSE
ATP1A1	0.240339	0.408581	FALSE
ATP1A3	-0.0698864	-0.022807	FALSE
ATP1B1	0.267002	0.19987	TRUE
ATP1B2	-0.125831	0.539216	FALSE
ATP1B3	0.273977	0.321184	FALSE
ATP23	0.0777895	0.342841	FALSE
ATP2A2	0.622408	0.305792	TRUE
ATP2A3	-0.0172452	0.593587	FALSE
ATP2B1	0.320994	0.69494	FALSE
ATP2B2	-0.258204	0.425168	FALSE
ATP2B3	0.173137	-0.220062	FALSE
ATP2B4	0.340928	0.514744	FALSE
ATP2C1	0.64853	0.64678	FALSE
ATP5S	0.628681	0.164563	FALSE
ATP6AP1	0.101931	0.308201	FALSE
ATP6AP2	0.018956	0.194588	FALSE
ATP6V0A1	0.240873	0.231366	FALSE
ATP6V0A2	0.366167	0.330664	FALSE
ATP6V0A4	-0.0801618	0.0837235	FALSE
ATP6V0C	0.506494	0.252609	TRUE
ATP6V0D1	0.577465	0.613632	TRUE
ATP6V0D2	0.0878832	0.451212	FALSE
ATP6V1A	0.751266	0.608007	TRUE
ATP6V1B1	-0.0413042	0.0908442	FALSE
ATP6V1B2	0.541871	0.663766	TRUE
ATP6V1C1	0.637491	0.633167	FALSE
ATP6V1C2	0.0563374	0.232038	FALSE
ATP6V1D	0.598961	0.312084	FALSE
ATP6V1E1	0.488835	0.433621	FALSE
ATP6V1F	0.329426	0.439088	FALSE
ATP6V1G1	0.669784	0.276758	FALSE
ATP6V1G2	0.210938	0.565008	FALSE
ATP6V1G3	-0.292031	0.19325	FALSE
ATP6V1H	0.643041	0.500686	FALSE
ATP7A	0.201469	0.352924	FALSE
ATP7B	0.533562	0.388177	FALSE
ATP8B1	0.258166	0.448828	FALSE
ATP9A	0.311455	0.85537	FALSE
ATP9B	0.637162	0.289306	FALSE
ATPAF1	0.274908	0.363071	FALSE
ATPAF2	0.488479	0.268557	FALSE
ATR	0.690677	0.145462	TRUE
ATRAID	0.263708	0.275943	FALSE
ATRIP	0.360618	0.188168	TRUE
ATRN	0.530785	0.128802	FALSE
ATRX	0.109351	0.167794	TRUE
ATXN1	0.348689	0.333651	TRUE
ATXN10	0.345727	0.35955	FALSE
ATXN1L	0.602354	0.367723	FALSE
ATXN2	0.583669	0.333352	FALSE
ATXN2L	0.458194	0.245899	FALSE
ATXN3	0.681582	0.780975	FALSE
ATXN7	0.662166	0.134691	TRUE
ATXN7L2	0.23283	0.7	TRUE
ATXN7L3	0.0397662	-0.0362108	TRUE
ATXN7L3B	0.322505	0.461607	FALSE
AUH	0.765164	0.477194	FALSE
AUP1	0.535877	0.382383	TRUE
AURKA	0.472109	-0.591176	TRUE
AURKAIP1	0.547711	0.291811	FALSE
AURKB	0.0916697	0.0315789	TRUE
AUTS2	0.108056	0.481126	FALSE
AVEN	0.196372	0.442035	FALSE
AVL9	0.813291	0.691567	FALSE
AVPR1B	0.379661	-0.516484	FALSE
AXIN1	0.399185	-0.357143	TRUE
AXL	0.148121	0.487104	FALSE
AZGP1	0.259146	-0.237911	TRUE
AZI2	0.252801	0.308804	TRUE
AZU1	-0.10452	0.0305444	FALSE
B2M	0.308379	0.718367	FALSE
B3GALNT1	0.231221	0.477812	FALSE
B3GALT5	0.1418	0.457143	FALSE
B3GALT6	0.462729	0.0221388	FALSE
B3GAT3	0.214681	0.452303	FALSE
B3GLCT	0.328388	0.663571	FALSE
B3GNT2	0.193431	-0.120098	FALSE
B3GNT7	0.17391	0.9	FALSE
B3GNT9	0.250503	0.589809	FALSE
B3GNTL1	0.107649	0.242411	FALSE
B4GALT1	-0.0745342	0.454054	FALSE
B4GALT3	0.505447	0.0984585	FALSE
B4GALT4	0.705064	0.606413	FALSE
B4GALT5	0.412366	0.888199	FALSE
B4GALT7	0.413221	0.626919	FALSE
B4GAT1	0.275601	0.378482	FALSE
B9D1	0.287812	0.389667	FALSE
B9D2	0.115953	0.160458	FALSE
BAALC	0.18593	0.398601	FALSE
BAAT	-0.278317	0.47619	FALSE
BABAM1	0.362488	0.179779	FALSE
BACE2	0.143915	0.4	FALSE
BACH1	0.240063	0.432064	TRUE
BAD	0.373613	0.220758	FALSE
BAG1	0.765985	0.798397	TRUE
BAG2	0.101694	0.893207	FALSE
BAG3	0.321108	0.567186	FALSE
BAG4	0.766215	0.66949	FALSE
BAG5	0.574163	0.694866	TRUE
BAG6	0.377435	0.149727	TRUE
BAHD1	0.282692	0.0285714	FALSE
BAIAP2	0.213874	0.528913	FALSE
BAIAP2L1	0.293847	0.830739	FALSE
BAIAP2L2	0.137306	0.700982	FALSE
BAK1	0.181296	0.526967	TRUE
BANF1	0.0765823	-0.0318692	TRUE
BANK1	0.239343	0.431959	FALSE
BANP	0.086452	0.577626	TRUE
BAP1	0.187773	0.105081	FALSE
BARD1	0.47884	0.147438	TRUE
BASP1	0.000251759	0.777305	FALSE
BAX	0.0314248	0.624474	TRUE
BAZ1A	0.302939	0.489816	TRUE
BAZ1B	0.739075	0.348096	TRUE
BAZ2B	0.255183	0.406593	FALSE
BBC3	0.235402	0.380112	FALSE
BBIP1	0.491117	0.0708678	TRUE
BBOX1	0.229983	0.902715	FALSE
BBS1	0.321853	0.366722	TRUE
BBS10	0.362091	0.274237	TRUE
BBS12	0.299954	0.560591	TRUE
BBS2	0.523038	0.462274	TRUE
BBS4	0.479899	0.201896	TRUE
BBS5	0.22609	0.229535	TRUE
BBS7	0.379368	0.453118	TRUE
BBS9	0.473558	0.165704	TRUE
BBX	0.599147	0.569206	FALSE
BCAM	-0.120935	0.561662	FALSE
BCAP29	0.329878	0.314145	FALSE
BCAP31	0.206012	0.55297	FALSE
BCAR1	0.46212	0.4	TRUE
BCAR3	0.0551282	0.705773	FALSE
BCAS1	0.443513	0.114943	FALSE
BCAS2	0.599038	0.00473543	TRUE
BCAS3	0.288425	0.197296	FALSE
BCAS4	0.576275	0.208889	FALSE
BCAT1	0.0854396	0.790724	FALSE
BCAT2	0.299738	0.377305	FALSE
BCCIP	0.678715	0.217246	TRUE
BCHE	0.0787901	0.245112	FALSE
BCKDHA	0.0878059	0.293263	FALSE
BCKDHB	0.253846	0.442165	FALSE
BCKDK	0.436999	0.643546	FALSE
BCL10	0.50815	0.348401	TRUE
BCL11A	-0.0527576	0.151961	FALSE
BCL11B	0.0421158	0.0584416	FALSE
BCL2	0.59894	0.601917	TRUE
BCL2L1	0.468108	0.708961	TRUE
BCL2L11	0.151089	0.22159	FALSE
BCL2L12	0.336976	-0.4	FALSE
BCL2L13	0.640837	0.581429	FALSE
BCL2L15	0.0304945	0.217094	FALSE
BCL2L2	0.827382	0.67033	FALSE
BCL3	-0.0769668	-0.113514	TRUE
BCL7A	0.488095	0.629571	FALSE
BCL7B	0.523551	0.254221	FALSE
BCL7C	0.37011	-0.168254	FALSE
BCL9	0.154413	0.0167488	FALSE
BCL9L	0.125892	0.300593	FALSE
BCLAF1	0.61265	0.0460846	FALSE
BCO1	0.347032	0.689582	FALSE
BCO2	-0.0473337	-0.233333	FALSE
BCOR	-0.0184771	-0.00246305	TRUE
BCORL1	0.160052	0.214286	FALSE
BCR	0.280719	0.637133	FALSE
BCS1L	0.63501	0.357233	FALSE
BDH1	0.134576	0.46195	FALSE
BDH2	0.293059	0.776434	FALSE
BDP1	0.56216	0.29094	TRUE
BECN1	0.378019	0.0379761	TRUE
BEND3	0.250787	0.330213	FALSE
BEND5	0.293452	-0.131868	FALSE
BEND7	0.290515	0.624767	FALSE
BET1	0.485204	0.586776	FALSE
BET1L	0.365522	0.342341	FALSE
BFAR	0.552255	0.416667	TRUE
BGN	-0.00319382	0.571476	FALSE
BHLHE40	0.205738	0.324176	FALSE
BHLHE41	0.289881	0.626316	FALSE
BHMT	0.163368	0.858058	FALSE
BHMT2	0.324852	0.605959	FALSE
BICC1	0.474702	0.874859	FALSE
BICD1	0.346108	0.804643	FALSE
BICD2	0.653166	0.568066	TRUE
BICDL1	0.207172	0.289953	FALSE
BID	0.0977975	0.602604	FALSE
BIN1	0.0861931	-0.8	TRUE
BIN2	-0.129297	0.817737	FALSE
BIN3	0.786226	0.286489	FALSE
BIRC2	0.392335	0.265786	TRUE
BIRC3	-0.196397	0.735537	TRUE
BIRC5	0.265546	0.132331	TRUE
BIRC6	0.61206	0.124706	FALSE
BLM	0.0889423	0.146798	TRUE
BLMH	0.305012	0.699555	FALSE
BLNK	0.0477106	0.648985	TRUE
BLOC1S1	0.131941	0.216078	TRUE
BLOC1S2	0.498764	0.19001	TRUE
BLOC1S3	0.335621	-0.0638866	TRUE
BLOC1S4	0.563194	0.328811	TRUE
BLOC1S5	0.674781	0.424697	TRUE
BLOC1S6	0.592537	0.111537	TRUE
BLVRA	0.229114	0.759716	TRUE
BLVRB	0.263287	0.403827	FALSE
BLZF1	0.694659	0.0813002	FALSE
BMF	-0.132299	0.351987	FALSE
BMP1	0.293131	0.634333	FALSE
BMP2K	0.128022	0.569743	FALSE
BMP8B	0.0489011	0.3	FALSE
BMPR2	0.497962	0.415958	FALSE
BMS1	0.675437	0.253433	FALSE
BMT2	0.523397	0.8	FALSE
BMX	0.19411	0.220168	FALSE
BNC2	-0.0961637	-0.29163	FALSE
BNIP1	0.229268	0.379223	FALSE
BNIP2	0.25554	0.609537	FALSE
BNIP3	0.417399	0.739079	FALSE
BNIP3L	0.559883	0.524975	FALSE
BOD1	0.630569	0.520841	TRUE
BOD1L1	0.663541	0.341794	TRUE
BOK	0.173508	0.360326	FALSE
BOLA1	0.443628	0.444315	FALSE
BOLA2	0.347412	0.34286	TRUE
BOLA3	0.0960172	0.407071	FALSE
BOP1	0.551355	0.362626	TRUE
BORCS5	0.559476	0.337513	TRUE
BORCS6	0.160979	0.218451	TRUE
BORCS7	0.374405	0.557177	TRUE
BORCS8	0.102766	0.109759	TRUE
BPGM	0.343825	-0.0995552	FALSE
BPHL	0.343723	0.262441	FALSE
BPI	0.086072	0.249007	FALSE
BPIFB6	0.26768	-0.210101	FALSE
BPNT1	0.601	0.6751	FALSE
BPTF	0.192986	0.201126	TRUE
BRAF	0.528293	0.546409	TRUE
BRAP	0.537346	0.135298	FALSE
BRAT1	0.630956	0.312992	FALSE
BRCA1	0.308632	0.559441	TRUE
BRCA2	0.196245	-0.464706	TRUE
BRCC3	0.306252	-0.112019	TRUE
BRD1	0.375043	0.348194	TRUE
BRD2	0.46874	0.425308	FALSE
BRD3	0.454458	0.518423	FALSE
BRD4	0.196744	0.169901	TRUE
BRD7	0.791985	-0.258929	TRUE
BRD8	0.676957	0.252942	TRUE
BRD9	0.732973	0.0423766	FALSE
BRF1	0.76	0.488787	TRUE
BRF2	0.662112	0.438004	FALSE
BRI3	0.506296	0.397129	FALSE
BRI3BP	0.544115	0.418099	FALSE
BRIX1	0.563006	0.473163	TRUE
BRK1	-0.0351008	0.289315	TRUE
BRMS1	0.498164	-0.0863442	TRUE
BRMS1L	0.646042	0.405523	TRUE
BROX	0.59222	0.517005	FALSE
BRPF1	0.405021	0.216934	TRUE
BRPF3	0.216825	0.00552036	TRUE
BRWD1	0.533479	0.0300802	FALSE
BSCL2	0.339466	0.257529	FALSE
BSDC1	0.57924	0.35006	FALSE
BSG	0.0814103	0.199316	TRUE
BSN	0.350075	-0.416667	FALSE
BSND	-0.167446	0.0202756	FALSE
BSPRY	0.470113	0.88483	FALSE
BST1	0.0191838	0.611658	FALSE
BST2	-0.0956268	0.804633	FALSE
BTAF1	0.470971	0.423631	FALSE
BTBD1	0.517537	0.123408	FALSE
BTBD10	0.316868	0.0789884	FALSE
BTBD11	0.0544685	0.472137	FALSE
BTBD19	0.104167	0.4	FALSE
BTBD2	0.115297	0.0592474	FALSE
BTBD3	-0.0154029	0.238095	FALSE
BTBD7	0.681634	0.4	FALSE
BTBD9	0.480514	0.299491	FALSE
BTD	0.15702	0.0963303	FALSE
BTF3	0.537568	0.280651	FALSE
BTF3L4	0.481327	0.421416	FALSE
BTG1	0.113596	0.7	FALSE
BTG3	0.28317	-0.8	FALSE
BTN1A1	0.115917	0.6	FALSE
BTN2A1	0.629475	0.511964	FALSE
BTN3A1	0.421397	0.683275	FALSE
BTN3A2	0.422357	0.709015	FALSE
BTN3A3	0.369419	0.710092	FALSE
BTNL9	-0.141456	0.655477	FALSE
BUB1	0.0925453	-0.552448	TRUE
BUB1B	0.132212	0.193913	TRUE
BUB3	0.642674	0.129182	TRUE
BUD13	0.641142	0.236354	TRUE
BUD31	0.627257	0.28369	TRUE
BYSL	0.537281	0.247039	FALSE
BZW1	0.567941	0.538421	TRUE
BZW2	0.656451	0.783913	FALSE
C10orf88	0.688462	0	FALSE
C11orf52	0.42795	0.473478	FALSE
C11orf54	0.280605	0.665518	FALSE
C11orf58	0.283362	0.300195	FALSE
C11orf95	0.198915	0.661672	FALSE
C11orf96	-0.0833333	0.64008	FALSE
C11orf98	0.033822	-0.0662744	FALSE
C12orf10	0.596034	0.510889	FALSE
C12orf29	0.280905	0.464192	FALSE
C12orf4	0.468444	-0.0759614	FALSE
C12orf43	0.466734	0.363516	FALSE
C12orf45	0.388885	0.422482	FALSE
C12orf57	0.228759	0.384107	FALSE
C12orf60	0.314286	0.9	FALSE
C12orf65	0.445997	0.384691	FALSE
C12orf66	0.451739	0.260738	TRUE
C12orf73	0.589031	0.153639	FALSE
C12orf75	0.424039	0.697461	FALSE
C14orf119	0.680148	0.423258	FALSE
C15orf40	0.506868	0.374479	FALSE
C15orf41	0.279633	0.08	FALSE
C15orf48	-0.0577381	0.705162	FALSE
C15orf61	0.52033	-0.8	FALSE
C16orf58	0.562569	0.416384	FALSE
C16orf70	0.736251	0.374961	FALSE
C16orf72	0.515083	-0.25	FALSE
C16orf74	0.177364	0.366667	FALSE
C16orf86	0.358585	0.669161	FALSE
C16orf87	0.409673	0.489011	FALSE
C16orf89	0.0834802	1	FALSE
C16orf91	0.428508	0.168643	FALSE
C17orf49	0.153987	0.310398	FALSE
C17orf75	0.159169	0.51922	FALSE
C17orf80	0.457969	0.383533	FALSE
C17orf97	-0.0720132	0.656479	FALSE
C18orf21	0.711417	0.0700615	FALSE
C18orf25	0.725612	0.41403	FALSE
C18orf32	0.662879	0.363067	FALSE
C19orf12	0.300437	0.565527	FALSE
C19orf25	0.274038	0.485729	FALSE
C19orf33	0.00857948	0.852164	FALSE
C19orf44	0.360109	-0.0890756	FALSE
C19orf47	0.268706	0.312319	FALSE
C19orf53	0.241541	-0.0135205	FALSE
C19orf54	0.160795	0.00630948	FALSE
C19orf66	0.139088	0.398545	FALSE
C19orf70	0.455923	0.13224	FALSE
C1D	0.31048	-0.117162	FALSE
C1GALT1	0.596761	0.345241	FALSE
C1GALT1C1	0.2941	0.355028	FALSE
C1orf109	0.474496	0.219839	FALSE
C1orf116	-0.0292303	0.673635	FALSE
C1orf122	0.269093	0.526077	FALSE
C1orf123	0.508401	0.548105	FALSE
C1orf131	0.514699	0.0703715	FALSE
C1orf174	0.469734	0.188305	FALSE
C1orf198	-0.0123368	0.669224	FALSE
C1orf21	0.0900806	0.10121	FALSE
C1orf210	-0.0777473	0.835255	FALSE
C1orf226	0.0470122	0.301019	FALSE
C1orf35	0.481491	0.397572	FALSE
C1orf43	0.654806	-0.0829592	FALSE
C1orf50	0.517491	0.511074	FALSE
C1orf52	0.550962	-0.0246387	FALSE
C1orf53	0.0448458	0.521368	FALSE
C1QA	-0.0304893	0.447289	TRUE
C1QB	-0.00243435	0.478	TRUE
C1QBP	0.287724	0.342007	TRUE
C1QC	-0.0364355	0.520879	TRUE
C1QL1	0.0704937	0.533333	FALSE
C1QTNF2	0.0735729	0.527473	FALSE
C1QTNF3	-0.0817919	0.563618	FALSE
C1QTNF5	-0.133293	0.316812	FALSE
C1R	0.309659	0.580901	FALSE
C1RL	0.512281	0.127097	FALSE
C1S	0.247378	0.496766	FALSE
C2	0.104394	0.19873	FALSE
C20orf194	0.188364	0.256979	FALSE
C20orf27	0.205936	0.458085	FALSE
C21orf2	0.316676	0.107349	FALSE
C22orf39	0.571953	0.0098482	FALSE
C2CD2	0.151973	0.241918	FALSE
C2CD2L	-0.0244303	0.553109	FALSE
C2CD3	0.202466	0.115196	FALSE
C2CD4C	-0.185623	0.543247	FALSE
C2CD5	0.403617	0.386461	FALSE
C2orf15	-0.0486697	0.101299	FALSE
C2orf49	0.508226	0.372264	FALSE
C2orf54	0.123047	0.0628406	FALSE
C2orf68	0.500019	0.15521	FALSE
C2orf69	0.306237	0.427606	FALSE
C2orf72	0.175386	0.478022	FALSE
C2orf76	0.207279	0.297553	FALSE
C2orf88	0.135258	0.0269427	FALSE
C3	0.0670285	0.0301548	TRUE
C3orf33	0.469953	0.312141	FALSE
C3orf38	0.774868	0.562348	FALSE
C3orf52	0.238521	0.227692	FALSE
C3orf58	0.347482	0.493069	FALSE
C3orf67	-0.0230635	-0.302564	FALSE
C4A	0.34082	0.439755	FALSE
C4B	0.309675	0.493717	FALSE
C4BPA	-0.17177	0.105532	FALSE
C4BPB	-0.111815	0.0218618	FALSE
C4orf19	0.176286	0.49597	FALSE
C4orf3	0.219566	-0.0467983	FALSE
C4orf33	0.124568	0.325744	FALSE
C5	0.267081	0.1426	FALSE
C5AR1	-0.0453671	0.557921	FALSE
C5orf15	0.465191	0.638204	FALSE
C5orf22	0.413758	0.195265	FALSE
C5orf24	0.350092	0.336651	FALSE
C5orf51	0.514817	0.48736	FALSE
C6	0.024776	0.247586	FALSE
C6orf10	0.094917	-0.0757136	FALSE
C6orf106	0.467905	0.514328	FALSE
C6orf120	0.606978	0.399502	FALSE
C6orf132	-0.190734	0.738239	FALSE
C6orf136	0.323787	0.22085	FALSE
C6orf203	0.577404	0.1531	FALSE
C6orf223	0.358063	-0.333333	FALSE
C6orf47	0.686171	0.306459	FALSE
C6orf89	0.729172	0.356633	FALSE
C7	-0.0790078	0.377055	FALSE
C7orf25	0.626144	0.288005	FALSE
C7orf26	0.495783	0.166225	FALSE
C7orf43	0.32378	0.368038	FALSE
C7orf50	0.616431	0.496497	FALSE
C8A	0.0573887	-0.0225742	FALSE
C8B	0.0421521	0.128583	FALSE
C8G	-0.0878614	-0.166694	FALSE
C8orf33	0.303869	0.641451	FALSE
C8orf37	0.384281	0.741609	FALSE
C8orf59	0.597996	0.211825	FALSE
C8orf76	0.612937	0.595238	FALSE
C8orf82	0.314991	0.298054	FALSE
C8orf88	0.262624	1	FALSE
C9	0.252247	-0.00947086	FALSE
C9orf16	-0.0528686	0.239363	FALSE
C9orf40	0.361225	0.32709	FALSE
C9orf64	0.67126	0.796868	FALSE
C9orf66	0.443371	0.653621	FALSE
C9orf72	0.234819	0.394362	TRUE
C9orf78	0.777875	0.540432	FALSE
C9orf85	0.736191	0.4139	FALSE
CA1	0.253105	0.242591	FALSE
CA12	0.0664835	0.730488	FALSE
CA13	0.404613	0.496905	FALSE
CA2	-0.0998017	0.44159	FALSE
CA3	0.280576	0.121036	FALSE
CA4	0.100804	0.639802	FALSE
CA5B	0.157076	0.400315	FALSE
CA8	-0.171775	0.366189	FALSE
CA9	0.207125	0.799527	FALSE
CAAP1	0.746511	0.281207	FALSE
CAB39	0.523642	0.615263	TRUE
CAB39L	0.328159	0.540348	FALSE
CABIN1	0.358629	0.0818059	TRUE
CABLES1	0.260276	0.721509	FALSE
CACFD1	0.568444	0.481478	FALSE
CACHD1	-0.141369	0.0748741	FALSE
CACNA2D1	0.23389	0.839561	FALSE
CACNA2D2	0.130552	0.285714	FALSE
CACNB3	0.0295082	0.50258	FALSE
CACNG6	-0.230593	-0.063588	FALSE
CACTIN	0.355057	0.346085	TRUE
CACUL1	0.543269	0.451923	FALSE
CACYBP	0.60439	0.620619	TRUE
CAD	0.287613	0.452497	FALSE
CADM1	-0.0654273	0.800593	TRUE
CADM3	-0.0730759	0.961709	FALSE
CADM4	0.0447552	0.482198	FALSE
CADPS2	0.298577	0.597387	FALSE
CALB1	0.257614	0.024576	FALSE
CALB2	-0.0867663	0.722865	FALSE
CALCB	0.0111847	-0.2	FALSE
CALCOCO1	-0.0123215	-0.0776758	FALSE
CALCOCO2	0.323995	0.379325	FALSE
CALCRL	0.233138	0.846872	TRUE
CALD1	0.220862	0.358512	FALSE
CALHM2	-0.100229	0.8	FALSE
CALML3	0.0436644	0.0677421	FALSE
CALML4	-0.0676282	0.762876	FALSE
CALR	0.232857	0.470031	TRUE
CALU	0.402394	0.646187	FALSE
CAMK1	-0.069312	0.705393	FALSE
CAMK1D	0.0541475	0.762061	FALSE
CAMK2B	-0.0196203	0.458427	FALSE
CAMK2D	0.428715	0.637383	TRUE
CAMK2G	0.437068	-0.0340557	FALSE
CAMK2N1	0.194628	0.223404	FALSE
CAMK4	0.0116138	0.589677	FALSE
CAMKK1	0.269163	0.500515	FALSE
CAMKK2	0.527122	-0.0166667	FALSE
CAMKMT	0.360364	0.51523	FALSE
CAMLG	0.610946	0.368038	TRUE
CAMP	0.239729	0.115264	FALSE
CAMSAP1	0.575911	0.425762	FALSE
CAMSAP2	0.118255	0.744176	FALSE
CAMSAP3	0.0874856	0.783217	FALSE
CAND1	0.64428	0.386415	TRUE
CAND2	0.422923	0.457919	FALSE
CANT1	0.400981	0.471328	FALSE
CANX	0.674614	0.779622	TRUE
CAP1	0.53576	0.449958	TRUE
CAP2	0.373339	0.733231	FALSE
CAPG	0.066229	0.826244	TRUE
CAPN1	0.223801	0.235307	TRUE
CAPN10	0.446211	0.375494	FALSE
CAPN15	0.311455	0.515911	FALSE
CAPN2	0.261517	0.634056	FALSE
CAPN5	0.178188	0.708516	FALSE
CAPN6	0.0530181	0.705486	FALSE
CAPN7	0.462428	0.279344	FALSE
CAPNS1	0.123599	0.0965898	TRUE
CAPRIN1	0.272129	0.628348	TRUE
CAPS	0.207223	0.301529	FALSE
CAPZA1	0.494414	0.64361	TRUE
CAPZA2	0.488795	0.293087	FALSE
CAPZB	0.16825	0.357143	TRUE
CARD10	0.183914	0.595394	FALSE
CARD11	0.028966	0.702687	TRUE
CARD14	0.135402	0	FALSE
CARD16	-0.255564	0.603245	FALSE
CARD19	0.461694	0.182995	FALSE
CARD6	-0.0697668	0.500962	FALSE
CARD8	0.0745629	0.446622	TRUE
CARD9	-0.298445	0.643258	FALSE
CARHSP1	0.391692	0.653739	FALSE
CARM1	0.275942	0.39595	TRUE
CARMIL1	0.382152	0.397708	FALSE
CARMIL2	-0.301442	0.515584	FALSE
CARNMT1	0.658167	0.564906	FALSE
CARS	0.425595	0.565666	FALSE
CARS2	0.406178	0.559726	FALSE
CASC3	0.295397	0.340867	TRUE
CASC4	0.439332	0.57079	FALSE
CASD1	0.534245	-0.166151	FALSE
CASK	0.386224	0.54969	TRUE
CASKIN1	0.190749	-0.0384615	FALSE
CASKIN2	-0.0340466	0.728459	FALSE
CASP1	-0.214719	0.802057	TRUE
CASP10	0.453119	0.633574	TRUE
CASP14	0.226709	0.412276	FALSE
CASP2	0.512579	0.391641	TRUE
CASP3	0.121805	0.628477	FALSE
CASP4	-0.12948	0.769873	FALSE
CASP6	0.263441	0.594014	FALSE
CASP7	0.458929	0.698712	FALSE
CASP8AP2	0.618575	0.379412	FALSE
CASP9	0.352941	0.365851	TRUE
CASQ2	0.0153388	0.483516	FALSE
CASR	0.256618	0.0267798	FALSE
CAST	0.637705	0.298971	FALSE
CASZ1	0.0384615	-0.183117	FALSE
CAT	0.553043	0.0742193	FALSE
CAV1	0.276738	0.748837	TRUE
CAV2	0.343978	0.609925	FALSE
CBFA2T3	-0.195668	0.0856553	FALSE
CBFB	0.158753	0.374484	TRUE
CBL	-0.116502	0.39634	TRUE
CBLB	0.257326	0.32237	TRUE
CBLL1	0.759485	0.185052	FALSE
CBR1	0.360681	0.720035	FALSE
CBR3	0.203898	0.686044	FALSE
CBR4	0.618616	0.218061	FALSE
CBS	-0.0189642	0.461804	FALSE
CBWD1	0.420544	0.437152	FALSE
CBWD2	0.330179	0.531746	FALSE
CBX1	0.199624	0.542674	FALSE
CBX2	-0.0538024	0.46601	TRUE
CBX3	0.634932	0.229117	TRUE
CBX4	-0.0376311	0.241481	TRUE
CBX5	0.486304	0.422927	TRUE
CBX6	0.207352	0.3255	FALSE
CBX7	0.278047	0.558158	FALSE
CBX8	0.164554	0.114345	TRUE
CBY1	0.471543	0.118679	FALSE
CC2D1A	0.323369	0.45145	FALSE
CC2D1B	0.642521	0.557029	FALSE
CC2D2A	0.282079	-0.0187286	TRUE
CCAR1	0.518049	0.340617	TRUE
CCAR2	0.784837	0.651589	TRUE
CCDC102A	0.1444	0.433157	FALSE
CCDC102B	0.161235	-0.0166667	FALSE
CCDC106	0.0347902	0.175476	FALSE
CCDC115	0.275528	0.27232	FALSE
CCDC117	0.404092	0.217876	FALSE
CCDC12	0.41562	0.324993	FALSE
CCDC120	0.222802	0.0760767	FALSE
CCDC124	0.326918	0.244185	FALSE
CCDC127	0.584979	0.489019	FALSE
CCDC130	0.340152	-0.0185858	FALSE
CCDC134	0.423713	0.395895	FALSE
CCDC137	0.389515	0.207792	FALSE
CCDC14	0.577312	0.357143	FALSE
CCDC149	0.34128	0.468906	FALSE
CCDC150	0.425868	-0.380567	FALSE
CCDC167	0.311801	0.0796992	FALSE
CCDC174	0.361552	0.264691	FALSE
CCDC182	-0.129883	0.0797296	FALSE
CCDC186	0.462912	0.773886	FALSE
CCDC22	0.351786	0.244871	TRUE
CCDC25	0.721264	0.729515	FALSE
CCDC28A	0.533619	0.646622	FALSE
CCDC28B	0.188156	0.428571	FALSE
CCDC39	0.179316	0.167092	FALSE
CCDC43	0.528817	0.435863	FALSE
CCDC47	0.6296	0.0935131	FALSE
CCDC50	0.50074	0.736141	FALSE
CCDC51	0.0977573	0.418265	FALSE
CCDC58	0.738497	0.546001	FALSE
CCDC59	0.283171	0.17033	FALSE
CCDC6	0.488911	0.665842	FALSE
CCDC61	0.345411	0.280696	FALSE
CCDC65	0.431571	-0.294298	FALSE
CCDC68	0.341469	0.259109	FALSE
CCDC69	-0.0126998	-0.0756569	FALSE
CCDC71L	0.346477	0.155089	FALSE
CCDC77	0.45153	-0.0175707	FALSE
CCDC8	-0.181993	0.907043	TRUE
CCDC80	0.116302	0.664514	FALSE
CCDC82	0.22953	0.126967	FALSE
CCDC84	0.532313	0.714286	FALSE
CCDC85A	0.139397	0.727877	FALSE
CCDC85B	0.0338415	0.367582	TRUE
CCDC85C	0.689942	0.621229	FALSE
CCDC86	0.256964	0.340404	FALSE
CCDC88A	0.419427	0.7354	FALSE
CCDC88B	-0.098691	0.573261	FALSE
CCDC88C	0.335191	0.620221	FALSE
CCDC9	0.296984	0.297516	FALSE
CCDC90B	0.332061	0.196951	FALSE
CCDC91	0.318178	0.410512	FALSE
CCDC92	0.249712	0.302011	TRUE
CCDC93	0.489864	0.302706	TRUE
CCDC97	0.316171	0.357353	FALSE
CCL14	-0.0416867	0.269428	FALSE
CCL16	0.0149882	0.0320197	FALSE
CCL18	-0.0545872	0.116599	FALSE
CCL19	-0.16529	-1	FALSE
CCL20	0.318209	0.333333	FALSE
CCL21	0.102813	0.767745	FALSE
CCL5	0.126229	0.693884	FALSE
CCM2	0.575755	0.567491	FALSE
CCNA2	-0.00840054	0.0878261	TRUE
CCNB1	0.336814	0.203478	TRUE
CCNB2	0.0983059	0.0823529	TRUE
CCNC	0.663899	0.0953163	TRUE
CCND1	0.0469138	0.721221	TRUE
CCND2	-0.243444	-0.190476	TRUE
CCNDBP1	0.600549	0.0310824	FALSE
CCNE2	0.525436	-0.4	FALSE
CCNH	0.45797	0.0290613	TRUE
CCNK	0.243388	-0.0255954	TRUE
CCNL1	0.429745	0.0207168	FALSE
CCNL2	0.643956	0.0852006	FALSE
CCNT1	0.563776	0.330729	TRUE
CCNT2	0.408902	0.330535	TRUE
CCNY	0.557856	0.593003	FALSE
CCNYL1	0.333166	0.00934862	FALSE
CCP110	0.465117	0.207906	TRUE
CCPG1	0.301419	0.513414	FALSE
CCRL2	0.161798	0.56044	FALSE
CCS	0.384707	0.494208	FALSE
CCSAP	0.162156	-0.142857	FALSE
CCSER1	0.203434	0.554869	FALSE
CCSER2	0.661081	0.311514	FALSE
CCT2	0.44363	0.133639	TRUE
CCT3	0.607086	0.00333611	TRUE
CCT4	0.432956	0.300945	TRUE
CCT5	0.455017	0.0857474	TRUE
CCT6A	0.565978	0.321777	TRUE
CCT6B	-0.00958146	0.17737	FALSE
CCT7	0.477452	0.057826	TRUE
CCT8	0.417819	0.321268	TRUE
CCZ1	0.190777	0.119442	FALSE
CD109	0.205201	0.659577	FALSE
CD14	0.0157514	0.752581	FALSE
CD151	0.20074	0.406774	TRUE
CD163	-0.120979	0.714215	FALSE
CD163L1	-0.134484	0.584567	FALSE
CD177	0.217041	0.461937	FALSE
CD180	-0.177895	0.494848	FALSE
CD2	0.124588	0.836076	FALSE
CD200	0.238492	0.521836	FALSE
CD200R1	0.100284	0.9	FALSE
CD209	-0.0585951	0.7053	FALSE
CD22	-0.0709529	0.9	FALSE
CD247	0.0155876	0.724031	FALSE
CD248	-0.100048	0.685099	FALSE
CD27	-0.00170455	0.426471	FALSE
CD274	0.423751	0.423846	FALSE
CD276	0.0502289	0.286174	FALSE
CD28	0.262408	0.632353	TRUE
CD2AP	0.671198	0.699453	TRUE
CD2BP2	0.581019	0.334501	TRUE
CD300A	0.0735414	0.566423	FALSE
CD300LF	-0.101285	0.8	FALSE
CD320	0.405281	0.553213	FALSE
CD33	-0.261189	0.700825	FALSE
CD34	-0.0285635	0.787622	FALSE
CD36	-0.103614	0.850032	FALSE
CD38	0.0402672	0.759262	FALSE
CD3D	-0.239073	0.479009	FALSE
CD3E	-0.203916	0.796154	FALSE
CD3G	-0.195977	0.734742	FALSE
CD4	-0.169231	0.790168	FALSE
CD40	0.121991	0.518219	FALSE
CD44	-0.146649	0.834798	TRUE
CD46	0.364212	0.135579	FALSE
CD47	0.400967	0.47901	TRUE
CD48	0.134162	0.688532	FALSE
CD5	-0.0531966	0.56994	FALSE
CD53	0.0605311	0.491146	TRUE
CD55	-0.00866907	0.63123	FALSE
CD58	0.391484	0.443807	FALSE
CD59	0.418011	0.265286	FALSE
CD5L	-0.155323	-0.367628	FALSE
CD6	-0.161146	0.402174	FALSE
CD63	0.441195	0.41896	TRUE
CD68	0.076909	0.777328	FALSE
CD7	0.109397	0.10197	FALSE
CD70	0.0241937	0.843369	FALSE
CD72	-0.17669	0.49878	FALSE
CD74	0.221722	0.869753	FALSE
CD79A	0.161801	0.323013	FALSE
CD81	0.106029	0.299101	TRUE
CD82	-0.0134615	0.736346	FALSE
CD83	-0.000568182	0.309158	FALSE
CD84	-0.0405605	0.668451	FALSE
CD86	0.0750389	-0.187879	FALSE
CD8A	-0.0950491	0.539046	TRUE
CD8B	-0.11173	0.34087	FALSE
CD9	0.224869	0.551645	TRUE
CD93	-0.363975	0.763395	FALSE
CD99	0.506227	0.478547	FALSE
CD99L2	-0.0239948	0.385015	FALSE
CDA	0.222963	0.657733	FALSE
CDADC1	0.634295	0.335838	FALSE
CDAN1	0.309799	0.010407	TRUE
CDC123	0.548723	0.236214	FALSE
CDC14A	0.0451049	0.45629	FALSE
CDC16	0.656248	0.327356	TRUE
CDC20	0.196291	-0.0617647	TRUE
CDC23	0.570011	0.397174	TRUE
CDC26	0.611071	0.15394	FALSE
CDC27	0.274606	-0.52381	TRUE
CDC34	0.233471	0.314623	TRUE
CDC37	0.0401837	0.454536	TRUE
CDC37L1	0.672978	0.510852	FALSE
CDC40	0.795011	0.375822	TRUE
CDC42	0.634009	0.0352979	TRUE
CDC42BPA	0.379588	0.76242	FALSE
CDC42BPB	0.665966	0.790353	FALSE
CDC42BPG	0.292561	0.590147	FALSE
CDC42EP1	0.180402	0.499398	FALSE
CDC42EP2	0.264387	0.413776	FALSE
CDC42EP3	0.165217	0.385101	FALSE
CDC42EP4	0.235153	0.399676	FALSE
CDC42EP5	-0.16285	0.688926	FALSE
CDC42SE1	0.156154	0.404762	FALSE
CDC42SE2	0.270995	0.467993	FALSE
CDC45	-0.0187565	0.4	FALSE
CDC5L	0.76722	0.421805	TRUE
CDC6	0.250433	0.8	TRUE
CDC73	0.565935	0.362404	TRUE
CDCA2	0.450968	0.0940887	FALSE
CDCA3	0.375612	0.125874	FALSE
CDCA5	-0.211509	0.264348	TRUE
CDCA7	0.0930946	-0.4	FALSE
CDCA7L	0.426801	0.333333	FALSE
CDCA8	0.190018	0.422556	TRUE
CDCP1	0.460693	0.822575	TRUE
CDH1	0.285178	0.67889	TRUE
CDH11	-0.117975	0.852071	FALSE
CDH13	-0.24709	0.845816	FALSE
CDH16	0.314319	0.343573	FALSE
CDH17	0.079595	0.479876	FALSE
CDH2	0.316983	0.509777	TRUE
CDH3	-0.157243	0.184274	FALSE
CDH4	-0.243488	0.859088	FALSE
CDH5	-0.118478	0.763646	TRUE
CDH6	0.222481	0.743851	FALSE
CDH7	0.175935	0.894427	FALSE
CDH9	0.0260135	0.0649555	FALSE
CDHR2	0.201948	0.74564	FALSE
CDHR5	0.219725	0.73287	FALSE
CDIP1	0.492455	0.437522	FALSE
CDIPT	0.435528	0.467093	FALSE
CDK1	0.137913	0.620055	TRUE
CDK10	0.470255	-0.8	FALSE
CDK11A	0.118269	0.440166	FALSE
CDK11B	0.249634	0.302187	FALSE
CDK12	0.130195	0.224215	TRUE
CDK13	0.709153	0.206327	FALSE
CDK14	0.517136	0.6067	FALSE
CDK16	-0.0237345	0.403308	FALSE
CDK17	-0.11279	0.64539	FALSE
CDK18	0.410781	0.423077	FALSE
CDK19	0.572684	0.659297	TRUE
CDK2	0.167583	-0.118881	TRUE
CDK20	0.553346	-0.180788	FALSE
CDK2AP1	0.242464	0.173784	FALSE
CDK4	0.56404	0.312362	TRUE
CDK5	0.488076	0.626346	TRUE
CDK5RAP1	0.585263	0.30597	FALSE
CDK5RAP2	0.341651	0.624585	FALSE
CDK5RAP3	0.484521	0.168047	FALSE
CDK6	0.355601	0.793522	TRUE
CDK7	0.58569	0.174479	TRUE
CDK8	0.474366	0.515584	TRUE
CDK9	0.505249	0.00425354	TRUE
CDKAL1	0.747203	0.387462	FALSE
CDKL5	0.154202	0.745323	FALSE
CDKN1A	0.342073	0.37881	TRUE
CDKN1B	-0.0656202	0.457474	TRUE
CDKN1C	0.145637	0.696839	FALSE
CDKN2A	0.221081	-0.0680342	TRUE
CDKN2AIP	0.654504	0.482893	FALSE
CDKN2AIPNL	0.625079	-0.0835806	FALSE
CDKN2C	-0.0359432	0.656047	FALSE
CDNF	0.204157	-0.00338828	FALSE
CDPF1	0.49082	0.0773136	FALSE
CDR2	0.438252	0.755917	FALSE
CDR2L	0.178666	0.629464	FALSE
CDS1	0.377381	0.329289	TRUE
CDS2	0.0668008	0.147845	FALSE
CDV3	0.594702	0.581179	FALSE
CDYL	0.354639	0.295589	TRUE
CDYL2	0.157438	0.784712	FALSE
CEACAM1	0.038973	0.348341	FALSE
CEACAM4	-0.0134178	0.191407	FALSE
CEACAM7	0.0105745	0.57735	FALSE
CEACAM8	0.0755036	-0.0021978	FALSE
CEBPA	-0.165348	0.632686	TRUE
CEBPB	0.283317	0.644704	FALSE
CEBPD	0.174413	0.338732	FALSE
CEBPG	0.341697	0.132353	FALSE
CEBPZ	0.435789	0.150866	FALSE
CEBPZOS	0.346716	0.351608	FALSE
CECR2	0.0445853	-0.00142857	TRUE
CELA3B	-0.155962	0.327327	FALSE
CELF1	0.557647	0.278788	FALSE
CELF2	0.0504512	-0.244755	FALSE
CELF4	0.428713	-0.6	FALSE
CELSR1	0.201473	0.582272	FALSE
CELSR2	-0.00425824	0.598536	FALSE
CELSR3	0.195284	0.10928	FALSE
CEMIP	0.0147436	0.165414	FALSE
CEND1	0.0700687	0.0744135	FALSE
CENPB	0.151207	0.16131	TRUE
CENPC	0.562546	0.0836067	TRUE
CENPE	-0.0994144	-0.0490196	FALSE
CENPF	0.338316	0.273482	FALSE
CENPH	0.247169	0.357895	TRUE
CENPL	0.31092	-0.6	TRUE
CENPM	0.105203	0.382353	TRUE
CENPN	0.427584	0.153846	TRUE
CENPO	0.25632	0	TRUE
CENPP	0.265527	0.571429	TRUE
CENPQ	0.44611	0.657343	TRUE
CENPT	0.481791	-0.364293	TRUE
CENPU	0.097026	0.229412	TRUE
CENPV	0.181454	0.873895	FALSE
CENPX	0.45	0.171429	FALSE
CEP104	0.488324	0.148092	FALSE
CEP112	-0.0187663	0.662778	FALSE
CEP120	0.6067	0.477877	FALSE
CEP128	0.440519	0.39615	FALSE
CEP131	0.0894231	0.184107	TRUE
CEP135	0.260027	0.20696	FALSE
CEP152	0.421886	0.596059	FALSE
CEP164	0.416269	0.18961	TRUE
CEP170	0.271946	0.285714	FALSE
CEP170B	0.523254	0.332353	FALSE
CEP192	0.651174	0.17598	FALSE
CEP250	0.464125	0.373061	FALSE
CEP290	0.541789	0.0546748	TRUE
CEP350	0.549264	0.405366	FALSE
CEP41	0.428391	0.725012	FALSE
CEP44	0.668395	0.332694	FALSE
CEP55	0.186538	0.512808	TRUE
CEP57	0.335229	0.156813	FALSE
CEP63	0.663581	0.0313765	FALSE
CEP68	0.255407	0.724066	FALSE
CEP76	0.547586	0.204278	FALSE
CEP78	0.518189	0.394857	FALSE
CEP83	0.40757	0.125403	FALSE
CEP85	0.183304	0.136448	FALSE
CEP89	0.264711	0.260322	FALSE
CEP95	0.269012	0.0166113	FALSE
CEP97	0.470839	0.545667	FALSE
CEPT1	0.53576	0.415779	FALSE
CERCAM	-0.177997	0.297094	FALSE
CERK	0.179143	-0.358242	FALSE
CERS2	0.591442	0.659633	FALSE
CERS4	0.37447	0.392457	FALSE
CERS5	0.39688	0.226911	FALSE
CERS6	0.291616	0.387663	FALSE
CES1	0.156103	0.739046	FALSE
CES2	0.314319	0.889454	FALSE
CES3	-0.0977867	0.535129	FALSE
CETN2	0.145149	0.34715	FALSE
CETN3	0.562489	0.403957	FALSE
CETP	-0.162072	0.268548	FALSE
CFAP100	0.398267	0.167832	FALSE
CFAP20	0.48548	0.38104	TRUE
CFAP36	0.428326	0.768687	FALSE
CFAP46	0.182509	0.203297	FALSE
CFAP97	0.513435	0.42683	FALSE
CFB	0.206262	-0.0524233	FALSE
CFD	-0.0390734	0.178389	FALSE
CFDP1	0.602643	0.800676	FALSE
CFH	0.0231731	0.350181	FALSE
CFHR1	0.251023	0.36703	FALSE
CFHR2	-0.221766	-0.00305823	FALSE
CFHR3	0.0756003	-0.00435967	FALSE
CFHR4	0.101314	0.130023	FALSE
CFHR5	0.217598	0.10941	FALSE
CFI	0.0164651	-0.109248	FALSE
CFL1	-0.0473302	0.347577	TRUE
CFL2	0.564265	0.809647	FALSE
CFP	-0.138112	-0.124233	FALSE
CFTR	1.08967e-05	0.0510574	TRUE
CGGBP1	0.710963	0.634353	FALSE
CGN	-0.0573242	0.721453	FALSE
CGNL1	-0.0657967	0.878297	FALSE
CGREF1	0.229547	0.671855	FALSE
CGRRF1	0.683937	0.27967	FALSE
CHAC2	0.115173	0.134762	FALSE
CHAD	0.0187246	-0.102585	TRUE
CHAF1A	0.261664	-0.127497	TRUE
CHAF1B	0.18481	0.0962406	TRUE
CHAMP1	0.390102	0.0706978	FALSE
CHCHD1	0.635609	0.112547	FALSE
CHCHD10	0.295492	0.609767	FALSE
CHCHD2	0.453281	0.384524	FALSE
CHCHD3	0.586443	0.500491	TRUE
CHCHD4	0.00940122	0.487795	FALSE
CHCHD5	0.420504	0.26056	FALSE
CHCHD6	0.504835	0.5928	TRUE
CHCHD7	0.529335	0.0752294	FALSE
CHD1	0.341673	0.283977	FALSE
CHD1L	0.563063	0.408099	FALSE
CHD2	0.405726	0.271421	FALSE
CHD3	-0.143332	0.743444	TRUE
CHD4	0.445105	0.256631	TRUE
CHD6	0.24074	0.227273	FALSE
CHD7	0.420583	0.123308	FALSE
CHD8	0.802572	0.45621	TRUE
CHD9	0.670657	0.162791	FALSE
CHDH	-0.169674	0.515995	FALSE
CHEK1	0.00595488	-0.0798152	TRUE
CHEK2	0.104401	0.50224	TRUE
CHERP	0.236071	0.0887777	TRUE
CHGA	0.0266313	-0.140819	FALSE
CHGB	0.368271	0.199547	FALSE
CHI3L1	0.0404557	0.415911	FALSE
CHIC2	0.321429	0.45	FALSE
CHID1	0.389318	0.399778	FALSE
CHIT1	-0.0860795	0.47497	FALSE
CHKA	0.264866	0.450306	FALSE
CHKB	0.428389	0.456399	FALSE
CHL1	0.0925295	0.255856	FALSE
CHM	0.0232143	0.332425	TRUE
CHML	0.536482	0.593349	FALSE
CHMP1A	0.716638	-1	TRUE
CHMP1B	0.578375	0.415791	TRUE
CHMP2A	0.147247	0.453702	TRUE
CHMP2B	0.788073	0.690344	TRUE
CHMP3	0.468031	0.347456	TRUE
CHMP4A	0.679289	0.587035	TRUE
CHMP4B	0.493257	0.511343	TRUE
CHMP4C	0.530409	0.752599	TRUE
CHMP5	0.706613	0.544815	TRUE
CHMP6	0.284484	0.426735	TRUE
CHMP7	0.772013	0.767547	FALSE
CHN1	0.151255	0.594122	FALSE
CHN2	-0.134494	0.216066	FALSE
CHORDC1	0.222284	0.339996	FALSE
CHP1	0.0543956	0.397377	FALSE
CHPF	0.397619	0.22682	FALSE
CHPF2	0.325361	0.311472	FALSE
CHPT1	0.318879	0.425835	FALSE
CHRAC1	0.469012	0.175832	TRUE
CHRD	0.0415895	0.477132	FALSE
CHRDL1	-0.138805	0.472527	FALSE
CHST11	0.108257	0.881119	FALSE
CHST12	0.288107	0.15863	FALSE
CHST13	0.235898	0.438899	FALSE
CHST14	0.190293	0.371062	FALSE
CHST15	0.30522	0.462892	FALSE
CHST2	-0.00513078	0.8	FALSE
CHST3	0.321717	0.8	FALSE
CHST7	-0.170775	0.5	FALSE
CHST9	0.209986	0.320306	FALSE
CHSY1	0.180551	0.231306	FALSE
CHTF18	0.264095	0.230558	TRUE
CHTF8	0.466432	0.267647	TRUE
CHTOP	0.541387	0.0584098	TRUE
CHUK	0.454625	0.462932	TRUE
CHURC1	0.612112	0.0145677	FALSE
CIAO1	0.446511	0.208563	TRUE
CIAPIN1	0.62552	0.635011	FALSE
CIB1	0.0136364	0.0376147	TRUE
CIC	0.0672203	0.0335557	TRUE
CIDEB	0.00795285	-0.150649	FALSE
CILP	0.0968864	0.778571	FALSE
CINP	0.77023	0.381512	FALSE
CIR1	0.335696	0.358984	FALSE
CIRBP	0.14576	0.524242	TRUE
CISD1	0.306884	0.538717	FALSE
CISD2	0.139545	0.418775	TRUE
CISD3	0.344453	0.437179	FALSE
CIT	-0.270983	0.765759	FALSE
CITED2	0.442146	0.364293	FALSE
CIZ1	0.31954	0.336512	FALSE
CKAP2	0.199084	-0.0661654	FALSE
CKAP2L	0.161346	-0.6	FALSE
CKAP4	0.559769	0.644055	FALSE
CKAP5	0.313919	0.4751	TRUE
CKB	0.413508	0.485747	TRUE
CKM	-0.0206098	-0.018665	FALSE
CKMT1A	0.0800309	0.311366	FALSE
CKMT2	0.540814	0.425466	FALSE
CKS1B	0.415376	0.519566	TRUE
CKS2	0.038096	0.412587	FALSE
CLASP1	0.436427	0.187955	FALSE
CLASP2	0.27649	0.595647	FALSE
CLASRP	0.196372	0.119703	FALSE
CLC	-0.203251	0.490081	FALSE
CLCC1	0.634222	0.563386	FALSE
CLCN3	0.535138	0.0333333	FALSE
CLCN5	-0.128456	0.40696	FALSE
CLCN6	0.333562	0.251084	FALSE
CLCN7	0.435202	0.652664	FALSE
CLCNKA	-0.155246	0.195744	FALSE
CLCNKB	-0.0934975	0.283851	FALSE
CLDN10	0.376934	0.018981	FALSE
CLDN12	0.380699	0.253529	FALSE
CLDN16	0.182648	0.373626	FALSE
CLDN2	0.123864	0.64438	FALSE
CLDN23	0.679623	0.112045	FALSE
CLDN3	0.0537971	0.766389	FALSE
CLDN5	-0.0016362	0.0803419	FALSE
CLDN7	-0.0142126	0.381151	FALSE
CLDN8	-0.0470745	0.805118	FALSE
CLDND1	0.568612	0.130725	FALSE
CLEC11A	0.0244318	0.443175	FALSE
CLEC14A	0.220342	0.772394	FALSE
CLEC16A	0.582436	0.311009	FALSE
CLEC18B	-0.158149	0.775306	FALSE
CLEC2B	-0.146985	0.785714	FALSE
CLEC3B	-0.0510697	0.325595	FALSE
CLGN	0.169067	0.454556	FALSE
CLIC1	0.557624	0.609313	FALSE
CLIC2	-0.0487762	0.778325	FALSE
CLIC3	-0.101931	0.577164	FALSE
CLIC4	0.460013	0.743184	FALSE
CLIC5	0.117002	0.241671	TRUE
CLIC6	0.0978318	0.831471	FALSE
CLINT1	0.627182	0.112349	FALSE
CLIP1	0.635273	0.571429	TRUE
CLIP2	0.224865	0.7253	FALSE
CLIP4	-0.111581	-1	FALSE
CLK1	0.442354	0.120588	FALSE
CLK2	0.515147	0.197365	FALSE
CLK3	0.487592	0.301328	FALSE
CLK4	0.54848	0.178431	FALSE
CLMN	0.593433	0.741952	FALSE
CLN3	0.47541	0.101806	FALSE
CLN5	0.678759	0.366926	FALSE
CLN6	0.288004	0.357094	FALSE
CLN8	0.433943	0.469074	FALSE
CLNK	0.188882	0.417734	FALSE
CLNS1A	0.0840051	0.0448244	TRUE
CLOCK	0.27848	-0.130282	TRUE
CLP1	0.387062	-0.220665	TRUE
CLPB	0.316983	0.415884	FALSE
CLPP	0.310385	0.326448	TRUE
CLPTM1	0.245935	0.490233	FALSE
CLPTM1L	0.454026	0.701853	FALSE
CLPX	0.562363	0.382272	TRUE
CLRN3	0.100321	0.586664	FALSE
CLSTN1	0.268727	0.415133	FALSE
CLSTN2	0.142019	0.56044	FALSE
CLSTN3	0.294712	0.488782	FALSE
CLTB	0.338116	0.4	FALSE
CLTC	0.389333	0.333908	TRUE
CLTCL1	0.284141	0.0392157	FALSE
CLU	0.389076	0.147984	FALSE
CLUAP1	0.492751	0.152396	FALSE
CLUH	0.299729	0.592132	FALSE
CLYBL	0.477772	0.552386	FALSE
CMA1	0.245376	0.39242	FALSE
CMAS	0.395009	0.447836	FALSE
CMBL	0.234269	0.858947	FALSE
CMC1	0.380717	0.168946	TRUE
CMC2	0.475272	0.451904	FALSE
CMC4	0.337856	0.497424	FALSE
CMIP	0.287189	0.418506	FALSE
CMPK1	0.4288	0.549671	FALSE
CMPK2	0.0724213	0.744713	FALSE
CMSS1	0.459203	0.355926	FALSE
CMTM3	-0.0491616	0.661765	FALSE
CMTM4	0.471328	0.71024	FALSE
CMTM6	0.52883	0.147159	FALSE
CMTR1	0.699825	0.528681	FALSE
CMTR2	0.697601	0.658197	FALSE
CNBP	0.612705	0.36603	FALSE
CNDP1	0.123541	-0.0640348	FALSE
CNDP2	0.268795	0.631406	FALSE
CNEP1R1	0.445439	-0.308303	FALSE
CNGA3	0.136834	-0.0163815	FALSE
CNIH4	0.614172	0.0456677	FALSE
CNKSR1	0.0263986	0.0602892	TRUE
CNKSR3	0.476734	0.637429	FALSE
CNN1	-0.0129214	0.78723	FALSE
CNN2	-0.0393794	0.670716	FALSE
CNN3	0.422161	0.499249	TRUE
CNNM2	0.163187	0.254137	FALSE
CNNM3	0.319401	0.475489	FALSE
CNNM4	0.29441	0.285365	FALSE
CNOT1	0.735044	0.0389769	TRUE
CNOT10	0.495464	0.208211	TRUE
CNOT11	0.281635	0.182643	TRUE
CNOT2	0.559518	0.264063	TRUE
CNOT3	0.147378	0.204939	TRUE
CNOT4	0.693147	0.228561	FALSE
CNOT6L	0.283608	0.31441	TRUE
CNOT7	0.670954	0.415161	TRUE
CNOT8	0.50793	0.170008	TRUE
CNOT9	0.728706	0.157159	FALSE
CNP	0.254358	0.670309	FALSE
CNPY2	0.55357	0.575433	FALSE
CNPY3	0.332386	0.503531	FALSE
CNPY4	0.217073	0.728246	FALSE
CNRIP1	0.212188	0.777268	FALSE
CNST	0.128872	0.196024	FALSE
CNTLN	0.420424	0.617216	FALSE
CNTN1	-0.302961	0.458255	FALSE
CNTN3	0.348971	-0.133333	FALSE
CNTN4	0.124043	0.4	FALSE
CNTNAP1	-0.141593	0.39951	TRUE
CNTRL	0.171684	0.603396	FALSE
CNTROB	0.514943	0.257174	FALSE
COA1	0.769279	0.395422	TRUE
COA3	0.174115	0.331146	TRUE
COA4	0.482994	0.304346	FALSE
COA5	0.389358	0.130646	FALSE
COA6	0.505529	0.2751	FALSE
COA7	0.358055	0.594829	FALSE
COASY	0.330383	0.465063	FALSE
COBL	0.154163	0.845899	FALSE
COBLL1	-0.0693028	0.297553	TRUE
COCH	0.0790977	0.416569	FALSE
COG1	0.398977	0.212408	TRUE
COG2	0.515532	0.414327	TRUE
COG3	0.801419	0.164192	TRUE
COG4	0.624156	0.233028	TRUE
COG5	0.721003	0.458762	TRUE
COG6	0.677198	0.210889	TRUE
COG7	0.721338	0.460272	TRUE
COG8	0.718746	0.34564	TRUE
COIL	0.450955	0.356844	TRUE
COL12A1	0.205638	0.70619	FALSE
COL14A1	-0.154502	0.875563	FALSE
COL15A1	-0.0373707	0.807942	FALSE
COL16A1	-0.0216346	0.777224	FALSE
COL18A1	-0.0237615	0.457427	TRUE
COL1A1	0.0150506	0.609174	TRUE
COL1A2	0.0568888	0.661857	FALSE
COL21A1	0.213243	0.7	FALSE
COL22A1	0.297902	0.101299	FALSE
COL23A1	0.355394	0.589536	FALSE
COL26A1	-0.00269179	0.230769	FALSE
COL28A1	0.116096	0.0427419	FALSE
COL2A1	0.160929	0.0470326	FALSE
COL3A1	0.209573	0.651571	FALSE
COL4A1	0.137162	0.244315	FALSE
COL4A2	0.166853	0.495598	FALSE
COL4A3	0.280047	0.164665	TRUE
COL4A3BP	0.549713	0.715457	FALSE
COL4A4	0.237525	0.039868	FALSE
COL4A5	-0.0212413	0.052861	FALSE
COL4A6	-0.217089	0.251586	FALSE
[truncated: 8,987 more rows]

## Sheet: S2G.UCEC.corr.table
S2G. Spearman's DNA-RNA Corr and RNA-Pro Corr for each gene in UCEC
gene	DNA-RNA Corr	RNA-Pro Corr	CORUM complex
A1BG	0.436207	0.328961	FALSE
A2M	0.0942631	-0.0248932	TRUE
A2ML1	0.0467365	0.815194	FALSE
A4GALT	0.394412	0.412213	FALSE
AAAS	0.425516	0.389773	FALSE
AACS	0.490025	0.810139	FALSE
AADAT	0.15922	0.482541	FALSE
AAED1	0.306763	0.275579	FALSE
AAGAB	0.483044	0.648321	FALSE
AAK1	0.399327	0.683306	FALSE
AAMDC	0.4006	0.622736	FALSE
AAMP	0.392569	0.427094	FALSE
AAR2	0.668046	0.221438	FALSE
AARS	0.382378	0.819053	FALSE
AARS2	0.546573	0.521473	FALSE
AARSD1	0.537828	0.389317	FALSE
AASDHPPT	0.459283	0.569434	FALSE
AASS	-0.0983346	0.866921	FALSE
AATF	0.281794	0.328238	FALSE
ABAT	0.106623	0.67725	FALSE
ABCA8	0.0966185	0.490249	FALSE
ABCB1	0.0376179	0.672823	TRUE
ABCB10	0.712622	0.311176	FALSE
ABCB6	0.0520518	0.504836	FALSE
ABCB7	0.215443	0.180556	FALSE
ABCB8	0.517619	0.276625	FALSE
ABCC1	0.165825	0.264984	FALSE
ABCC10	0.319782	-0.0242265	FALSE
ABCC3	0.167175	0.735798	FALSE
ABCC4	0.105868	0.669912	FALSE
ABCD1	0.0488233	0.550892	FALSE
ABCD3	0.0482953	0.37527	FALSE
ABCD4	0.424074	0.389976	FALSE
ABCE1	0.234439	0.593172	FALSE
ABCF1	0.47687	0.646118	FALSE
ABCF2	0.518809	0.802108	FALSE
ABCF3	0.792534	0.495014	FALSE
ABCG1	-0.0732957	0.783302	FALSE
ABHD10	0.0482824	0.283274	FALSE
ABHD11	0.1084	0.659242	FALSE
ABHD12	0.601028	0.392669	FALSE
ABHD13	0.519449	0.00501274	FALSE
ABHD14A	0.29698	0.192546	FALSE
ABHD14A.ACY1	0.0723588	0.19097	FALSE
ABHD14B	0.353133	0.569429	FALSE
ABHD16A	0.206387	0.565907	FALSE
ABHD17A	0.477209	0.138535	FALSE
ABHD17B	0.636439	0.452047	FALSE
ABHD17C	0.209612	0.622915	FALSE
ABHD2	0.309078	0.396825	FALSE
ABHD3	0.318144	0.495849	FALSE
ABHD4	-0.0569695	0.458636	FALSE
ABHD5	-0.0133161	0.498327	FALSE
ABHD6	-0.0408336	0.758525	FALSE
ABI1	0.624637	0.59449	TRUE
ABI2	0.355386	0.581734	FALSE
ABI3	0.343147	0.759891	TRUE
ABI3BP	0.19437	0.651027	FALSE
ABL1	0.541706	0.406295	TRUE
ABL2	0.693277	0.468962	FALSE
ABLIM1	0.238787	0.677391	FALSE
ABLIM2	0.0252374	0.496157	FALSE
ABLIM3	0.093568	0.710667	FALSE
ABO	-0.239497	0.8	FALSE
ABR	0.106234	0.608223	FALSE
ABRACL	0.423716	0.605829	FALSE
ABRAXAS1	0.373304	0.456748	FALSE
ABRAXAS2	0.603313	0.525509	TRUE
ABT1	0.69106	0.574544	FALSE
ABTB2	0.0877725	0.425293	FALSE
ACAA1	0.328807	0.552385	FALSE
ACAA2	0.220627	0.860317	FALSE
ACACA	0.310354	0.829217	FALSE
ACACB	0.246098	-0.108719	FALSE
ACAD10	0.602174	0.571187	FALSE
ACAD11	0.0433089	0.167879	FALSE
ACAD8	0.38204	0.505296	TRUE
ACAD9	0.705941	0.418205	FALSE
ACADL	-0.110063	0.745174	FALSE
ACADM	0.0991742	0.654232	FALSE
ACADS	0.270418	0.637971	FALSE
ACADSB	0.0445499	0.415928	FALSE
ACADVL	0.452402	0.475548	FALSE
ACAP1	0.106452	0.713857	TRUE
ACAP2	0.571421	0.582686	FALSE
ACAP3	0.275202	0.222559	FALSE
ACAT1	0.426996	0.550575	FALSE
ACAT2	0.179884	0.771985	FALSE
ACBD3	0.725293	0.64739	FALSE
ACBD5	0.507536	0.4684	FALSE
ACBD6	0.802184	0.602135	FALSE
ACBD7	0.159969	0.787329	FALSE
ACD	0.198334	0.063055	TRUE
ACE	-0.00802666	0.663541	FALSE
ACIN1	0.273004	0.458438	TRUE
ACLY	0.555144	0.746465	FALSE
ACO1	0.463567	0.751764	FALSE
ACO2	0.275273	0.367028	FALSE
ACOT1	0.100379	0.443975	FALSE
ACOT11	-0.142376	0.74505	FALSE
ACOT13	0.0835012	0.574669	FALSE
ACOT2	0.282827	0.190909	FALSE
ACOT4	0.166746	0.48666	FALSE
ACOT7	0.0838899	0.9029	FALSE
ACOT8	0.558502	0.604984	FALSE
ACOT9	0.350148	0.552586	FALSE
ACOX1	0.092701	0.454994	FALSE
ACOX2	0.0230357	0.41226	FALSE
ACOX3	0.263358	0.775329	FALSE
ACP1	0.442792	0.133475	FALSE
ACP2	0.217746	0.613582	FALSE
ACP5	0.200102	0.785413	FALSE
ACP6	0.360127	0.682278	FALSE
ACPP	0.116635	0.758831	FALSE
ACSF2	0.278112	0.849182	FALSE
ACSF3	0.527871	0.509388	FALSE
ACSL1	-0.0204348	0.787833	FALSE
ACSL3	0.243828	0.471643	FALSE
ACSL4	0.197936	0.85357	FALSE
ACSL5	0.292962	0.870742	FALSE
ACSM3	0.0876523	0.810159	FALSE
ACSS1	0.188878	0.869195	FALSE
ACSS2	0.324538	0.790983	FALSE
ACSS3	-0.0352562	0.916142	FALSE
ACTA1	0.333354	0.243247	FALSE
ACTA2	0.12662	0.739214	TRUE
ACTB	0.377011	0.199787	TRUE
ACTBL2	0.0363395	0.156232	FALSE
ACTG1	0.737702	0.291285	TRUE
ACTG2	-0.0771384	0.760971	TRUE
ACTL6A	0.731967	0.298896	TRUE
ACTL8	0.229814	0.582626	FALSE
ACTN1	0.125998	0.697334	TRUE
ACTN2	0.0413031	0.279793	FALSE
ACTN3	0.232586	0.245617	FALSE
ACTN4	0.193185	0.603646	TRUE
ACTR10	0.383247	-0.0388968	FALSE
ACTR1A	0.738229	0.567798	FALSE
ACTR1B	0.32513	0.165627	FALSE
ACTR2	0.536784	0.288089	TRUE
ACTR3	0.652168	0.18272	TRUE
ACTR3B	0.606369	0.622942	FALSE
ACTR5	0.548839	0.373931	TRUE
ACTR6	0.314431	0.242386	TRUE
ACTR8	0.443446	0.276081	TRUE
ACVR1	0.211348	0.342776	FALSE
ACY3	0.00539229	0.858498	FALSE
ACYP1	0.387412	0.663906	FALSE
ACYP2	0.147123	0.44313	FALSE
ADA	0.260918	0.816991	TRUE
ADA2	-0.00854412	0.581785	FALSE
ADAL	0.0832109	0.513506	FALSE
ADAM10	0.222889	0.255261	FALSE
ADAM15	0.103528	0.513504	TRUE
ADAM17	0.420869	0.48822	FALSE
ADAM28	0.156226	0.853089	FALSE
ADAM9	0.143201	0.542625	TRUE
ADAMDEC1	-0.290471	0.535891	FALSE
ADAMTS1	0.201666	0.691741	FALSE
ADAMTS15	-0.132393	0.795324	FALSE
ADAMTS2	0.271747	0.659763	FALSE
ADAMTS5	0.212442	0.299678	FALSE
ADAMTS8	0.188151	0.639644	FALSE
ADAMTS9	0.354224	0.534587	FALSE
ADAMTSL1	0.107407	0.704744	FALSE
ADAMTSL2	-0.0192839	0.653793	FALSE
ADAMTSL3	0.0729959	0.701511	FALSE
ADAMTSL4	0.0651428	0.464151	FALSE
ADAMTSL5	0.116074	0.427603	FALSE
ADAP1	0.435291	0.654588	FALSE
ADAP2	0.185851	0.674474	FALSE
ADAR	0.737305	0.676165	TRUE
ADARB1	0.359403	0.534798	FALSE
ADAT1	0.42359	0.60297	FALSE
ADAT2	0.149907	0.630088	FALSE
ADAT3	0.380629	0.265618	FALSE
ADCK1	0.356284	0.19552	FALSE
ADCK5	0.443317	0.118413	FALSE
ADCY3	0.242719	0.54369	FALSE
ADCY5	0.429962	-0.22941	FALSE
ADCY6	0.16263	-0.02573	FALSE
ADD1	0.295098	0.377749	FALSE
ADD2	0.347572	0.488227	TRUE
ADD3	0.421079	0.738556	FALSE
ADGRA3	0.347295	0.354252	FALSE
ADGRE2	0.202672	0.766481	FALSE
ADGRE5	0.234931	0.70665	FALSE
ADGRF5	0.121149	0.738488	FALSE
ADGRG1	0.208189	0.43279	TRUE
ADGRG2	-0.0335209	0.776754	FALSE
ADGRG3	0.253086	0.798827	FALSE
ADGRL1	0.326059	0.307126	FALSE
ADGRL2	0.270962	0.894919	FALSE
ADGRL3	0.193209	0.781429	TRUE
ADGRL4	-0.0136964	0.485101	FALSE
ADH1A	0.286223	0.244504	FALSE
ADH1B	-0.0443195	0.748441	FALSE
ADH1C	0.267781	0.853785	FALSE
ADH4	0.266492	0.115001	FALSE
ADH5	0.649364	0.710421	FALSE
ADH6	0.280942	0.567739	FALSE
ADH7	0.261253	0.799714	FALSE
ADHFE1	0.204387	0.771429	FALSE
ADI1	0.392778	0.164992	FALSE
ADIPOQ	-0.101559	-0.113025	TRUE
ADIPOR1	0.549545	0.605779	FALSE
ADIRF	0.258487	0.817775	FALSE
ADK	0.563127	0.711812	FALSE
ADM	0.383062	0.528594	FALSE
ADNP	0.45511	0.6441	FALSE
ADO	0.643369	0.540414	FALSE
ADPGK	0.5125	0.354192	FALSE
ADPRH	0.282654	0.869505	FALSE
ADPRHL2	0.441703	0.218408	FALSE
ADPRM	0.520891	0.0061574	FALSE
ADRA2A	0.360686	0.373614	TRUE
ADRM1	0.587222	0.299579	FALSE
ADSL	0.495983	0.616564	FALSE
ADSS	0.722454	0.696273	FALSE
ADSSL1	0.444529	0.876784	FALSE
AEBP1	-0.0280862	0.750055	FALSE
AEBP2	0.583415	-0.0150302	TRUE
AES	0.359781	0.626371	FALSE
AFAP1	-0.0799395	0.638835	FALSE
AFAP1L1	0.327912	0.560633	FALSE
AFAP1L2	0.266172	0.884196	FALSE
AFDN	0.0504598	0.814011	FALSE
AFF1	0.237846	0.410021	TRUE
AFF4	0.279728	0.290724	TRUE
AFG1L	0.29725	0.509086	FALSE
AFG3L2	0.497811	0.328609	TRUE
AFM	0.316456	-0.0482922	FALSE
AFMID	0.141991	0.195219	FALSE
AFTPH	0.258531	0.510121	FALSE
AGA	0.0610757	0.526236	FALSE
AGAP1	0.351243	0.453914	FALSE
AGAP2	0.0846077	0.372063	FALSE
AGAP3	0.574674	0.390306	FALSE
AGFG1	0.441288	0.433475	FALSE
AGFG2	0.49054	0.668527	FALSE
AGGF1	0.493846	0.187965	FALSE
AGK	0.437845	0.330652	FALSE
AGL	0.402818	0.424633	FALSE
AGMAT	0.344991	0.875694	FALSE
AGO1	0.128305	-0.156202	FALSE
AGO2	0.505671	0.0261232	TRUE
AGO3	0.50787	0.156941	FALSE
AGO4	0.0920479	0.212915	TRUE
AGPAT1	0.473411	0.390375	FALSE
AGPAT2	0.265366	0.531646	FALSE
AGPAT3	0.0979306	0.288471	FALSE
AGPAT4	0.432437	0.583175	FALSE
AGPAT5	0.426629	0.256274	FALSE
AGPS	-0.0938789	0.449917	TRUE
AGR2	0.220102	0.954562	FALSE
AGR3	0.12516	0.918393	FALSE
AGRN	-0.0921635	0.2507	FALSE
AGT	0.222765	-0.0356803	TRUE
AGTPBP1	0.257727	0.458075	FALSE
AGTRAP	0.0409652	0.256088	FALSE
AHCTF1	0.74995	0.448919	FALSE
AHCY	0.628125	0.511591	FALSE
AHCYL1	0.522794	0.663012	FALSE
AHCYL2	0.556301	0.76225	FALSE
AHDC1	0.177873	0.416205	FALSE
AHNAK	0.364085	0.865616	TRUE
AHNAK2	0.137531	0.806203	FALSE
AHR	0.371847	0.865161	TRUE
AHSA1	0.511325	0.791492	FALSE
AHSG	0.33276	0.205836	FALSE
AHSP	0.100169	0.184996	FALSE
AIDA	0.716107	0.538198	FALSE
AIF1	0.111364	0.910132	FALSE
AIF1L	-0.178493	0.877627	FALSE
AIFM1	0.0373468	0.684789	TRUE
AIFM2	0.310233	0.711645	FALSE
AIG1	0.0591731	0.415399	FALSE
AIMP1	0.34804	0.124361	TRUE
AIMP2	0.431597	0.206769	TRUE
AIP	0.66966	0.355199	FALSE
AJUBA	0.564582	0.542658	TRUE
AK1	0.643421	0.780369	FALSE
AK2	0.40346	0.47155	FALSE
AK3	0.442263	0.511325	FALSE
AK4	0.23264	0.851891	FALSE
AK6	0.232669	0.548254	FALSE
AK7	0.0061109	0.80577	FALSE
AK8	0.428548	0.705495	FALSE
AKAP1	0.0825508	0.774445	TRUE
AKAP10	0.651578	0.444999	FALSE
AKAP11	0.551621	0.245623	FALSE
AKAP12	0.134004	0.57813	FALSE
AKAP13	0.413927	0.754419	TRUE
AKAP17A	0.52366	0.282487	FALSE
AKAP5	0.22042	0.20539	TRUE
AKAP7	0.329893	0.746414	FALSE
AKAP8	0.427094	0.413473	FALSE
AKAP8L	0.462723	0.478066	TRUE
AKAP9	0.658884	0.570141	TRUE
AKIP1	0.502809	0.114664	FALSE
AKIRIN2	0.233542	0.523605	FALSE
AKNA	0.278191	0.461254	FALSE
AKR1A1	0.240609	0.350088	FALSE
AKR1B1	-0.101043	0.696626	FALSE
AKR1B10	0.284407	0.661615	FALSE
AKR1B15	0.223589	0.578786	FALSE
AKR1C1	0.398874	0.54639	FALSE
AKR1C2	0.411688	0.631633	FALSE
AKR1C3	0.327882	0.918703	FALSE
AKR1C4	0.163714	0.229715	FALSE
AKR1D1	0.0286906	-0.276461	FALSE
AKR7A2	0.493313	0.568081	FALSE
AKR7A3	0.245451	0.321941	FALSE
AKT1	0.400793	0.148219	TRUE
AKT1S1	0.185576	0.290423	FALSE
AKT2	0.490105	0.325564	TRUE
AKT3	-0.029205	0.759674	FALSE
AKTIP	0.22452	0.338658	TRUE
ALAD	0.378839	0.541551	FALSE
ALAS1	0.362558	0.335818	FALSE
ALB	-0.145199	0.036169	FALSE
ALCAM	-0.380935	0.868455	FALSE
ALDH16A1	0.213115	0.341434	FALSE
ALDH18A1	0.506644	0.704319	FALSE
ALDH1A1	0.36319	0.924229	FALSE
ALDH1A2	0.0862924	0.911634	FALSE
ALDH1A3	0.393747	0.828978	FALSE
ALDH1B1	0.21198	0.649283	FALSE
ALDH1L1	-0.103228	0.881469	FALSE
ALDH1L2	0.146292	0.764036	FALSE
ALDH2	0.283005	0.738171	FALSE
ALDH3A1	0.0856935	0.820554	FALSE
ALDH3A2	0.312378	0.849439	FALSE
ALDH3B1	0.244311	0.742203	FALSE
ALDH4A1	0.143898	0.771873	FALSE
ALDH5A1	-0.126001	0.791558	FALSE
ALDH6A1	0.149541	0.826634	FALSE
ALDH7A1	0.45913	0.640789	FALSE
ALDH9A1	0.669179	0.666637	FALSE
ALDOA	0.205268	0.776406	FALSE
ALDOB	0.369622	0.156502	FALSE
ALDOC	0.428341	0.749153	FALSE
ALG1	0.563557	0.205919	FALSE
ALG10	0.45982	0.207666	FALSE
ALG11	0.410034	0.114025	FALSE
ALG12	0.430825	0.0527465	FALSE
ALG13	0.354876	0.351726	FALSE
ALG14	0.30456	0.0396954	FALSE
ALG2	0.777042	0.695712	FALSE
ALG5	0.456428	0.149275	FALSE
ALG6	0.339643	0.230691	FALSE
ALG8	0.592627	0.111932	FALSE
ALG9	0.531456	0.449222	FALSE
ALKBH1	0.722299	0.343828	FALSE
ALKBH2	0.241701	0.549579	FALSE
ALKBH3	0.184776	0.567875	FALSE
ALKBH4	0.66603	0.213829	FALSE
ALKBH5	0.557853	0.53433	FALSE
ALKBH6	0.28914	-0.0382589	FALSE
ALKBH7	0.219455	0.354598	FALSE
ALKBH8	0.143227	0.508562	FALSE
ALMS1	0.356602	0.378046	FALSE
ALOX15	0.0433938	0.742857	FALSE
ALOX15B	-0.194907	0.550773	FALSE
ALOX5	-0.179291	0.840791	FALSE
ALOX5AP	0.139889	0.606459	FALSE
ALPG	0.139445	0.79752	FALSE
ALPK1	0.301331	0.485516	FALSE
ALPL	0.0136271	0.895922	FALSE
ALPP	0.138978	0.725043	FALSE
ALS2	0.762836	0.577825	FALSE
ALYREF	0.624273	0.202035	TRUE
AMACR	-0.291118	0.541436	FALSE
AMBP	0.379272	-0.083781	FALSE
AMBRA1	0.608028	0.228212	FALSE
AMD1	0.500794	0.322532	FALSE
AMDHD2	0.158483	0.0380677	FALSE
AMFR	0.231947	0.334956	TRUE
AMMECR1	-0.0261529	0.659795	FALSE
AMMECR1L	0.499398	0.566485	FALSE
AMN1	0.0592666	0.479194	FALSE
AMOT	0.20091	0.779679	TRUE
AMOTL1	0.263358	0.54437	TRUE
AMOTL2	0.439978	0.496721	TRUE
AMPD1	0.0490563	0.342356	FALSE
AMPD2	0.425322	0.548631	FALSE
AMPD3	0.059422	0.703309	FALSE
AMPH	0.21864	0.8083	FALSE
AMT	0.0241364	0.788601	FALSE
AMY1B	0.21987	0.66071	FALSE
AMZ2	0.32822	0.252902	FALSE
ANAPC1	0.570225	0.365131	TRUE
ANAPC10	0.431443	0.241149	TRUE
ANAPC11	0.614168	0.156602	FALSE
ANAPC13	0.0213763	0.121635	FALSE
ANAPC15	0.366323	0.120629	FALSE
ANAPC16	0.527098	-0.163123	FALSE
ANAPC2	0.546188	0.146805	TRUE
ANAPC4	0.484058	0.664876	TRUE
ANAPC5	0.685648	0.122977	TRUE
ANAPC7	0.55592	0.403388	TRUE
ANG	-0.171953	0.15387	TRUE
ANGEL2	0.760419	0.586675	FALSE
ANGPT2	0.198898	0.669799	FALSE
ANGPT4	0.0623707	0.8	FALSE
ANGPTL1	0.396991	0.757214	FALSE
ANGPTL2	0.101022	0.716651	FALSE
ANGPTL4	0.159947	0.585546	TRUE
ANK1	-0.117744	0.0202335	FALSE
ANK2	0.304458	0.747959	FALSE
ANK3	0.424621	0.901022	TRUE
ANKFY1	0.487484	0.493716	FALSE
ANKHD1	0.552197	0.25585	FALSE
ANKHD1.EIF4EBP3	0.241921	0.294242	FALSE
ANKIB1	0.751561	0.347784	FALSE
ANKLE2	0.232818	0.562892	FALSE
ANKMY2	0.599926	0.796308	FALSE
ANKRD10	0.493647	0.476305	FALSE
ANKRD11	0.339998	0.172622	TRUE
ANKRD12	0.204341	0.409749	FALSE
ANKRD13A	0.379965	0.678116	FALSE
ANKRD13D	0.500933	0.235405	FALSE
ANKRD16	0.57783	0.205285	FALSE
ANKRD17	0.390704	0.666295	FALSE
ANKRD2	-0.0276683	0.527424	FALSE
ANKRD22	0.0734283	0.727294	FALSE
ANKRD26	0.640123	0.298335	FALSE
ANKRD27	0.361045	0.569335	FALSE
ANKRD28	0.379671	0.589309	TRUE
ANKRD35	-0.225695	0.847838	FALSE
ANKRD39	0.291613	0.0654426	FALSE
ANKRD40	0.64022	0.464578	FALSE
ANKRD42	0.264805	0.745981	FALSE
ANKRD44	0.143802	0.843588	FALSE
ANKRD45	0.0266775	0.688265	FALSE
ANKRD46	0.609509	0.398265	FALSE
ANKRD49	0.133172	0.189554	FALSE
ANKRD50	0.428557	0.436585	FALSE
ANKRD52	0.570766	0.538892	FALSE
ANKRD54	0.563524	0.126091	FALSE
ANKS1A	0.403477	0.563406	FALSE
ANKS3	0.370377	0.0886849	FALSE
ANKS4B	-0.0663744	0.535903	FALSE
ANKS6	0.0747037	0.173085	TRUE
ANKZF1	0.182618	0.72166	FALSE
ANLN	0.189856	0.855894	FALSE
ANO1	0.06856	0.856098	FALSE
ANO10	0.148842	0.392055	FALSE
ANO6	0.279311	0.37175	FALSE
ANO9	-0.0972582	0.00850055	FALSE
ANOS1	-0.139079	0.684211	TRUE
ANP32A	0.224284	0.438848	TRUE
ANP32B	-0.231088	0.358799	TRUE
ANP32C	-0.0845521	0.522233	FALSE
ANP32E	0.700947	0.744751	FALSE
ANPEP	0.0792285	0.808592	FALSE
ANTXR1	0.00823941	0.651789	FALSE
ANTXR2	0.0988946	0.60151	FALSE
ANXA1	0.336591	0.909918	FALSE
ANXA11	0.32173	0.800666	FALSE
ANXA13	0.073222	0.138475	FALSE
ANXA2	0.45233	0.845618	TRUE
ANXA3	0.0563141	0.759809	FALSE
ANXA4	0.23153	0.90105	FALSE
ANXA5	0.225158	0.595488	FALSE
ANXA6	0.349735	0.813061	TRUE
ANXA7	0.636746	0.763933	TRUE
ANXA8	0.374667	0.628512	FALSE
ANXA8L1	0.235094	0.832221	FALSE
ANXA9	0.171226	0.638499	FALSE
AOAH	0.0328541	0.807374	FALSE
AOC1	0.123276	0.869855	FALSE
AOC3	-0.00825168	0.690969	FALSE
AOX1	0.0128691	0.468161	FALSE
AP1AR	0.473198	0.248172	TRUE
AP1B1	0.271199	0.591537	TRUE
AP1G1	0.472793	0.625309	TRUE
AP1G2	0.15432	0.519267	TRUE
AP1M1	0.547542	0.319459	TRUE
AP1M2	0.399148	0.416709	TRUE
AP1S1	0.711125	0.188193	TRUE
AP1S2	0.0828773	0.428089	TRUE
AP1S3	0.68284	0.534149	TRUE
AP2A1	0.270065	0.285712	TRUE
AP2A2	0.183769	0.788584	FALSE
AP2B1	0.510173	-0.0409312	FALSE
AP2M1	0.689291	0.308976	FALSE
AP2S1	0.112516	-0.081989	FALSE
AP3B1	0.407935	0.0922187	TRUE
AP3B2	-0.207769	0.624631	TRUE
AP3D1	0.426833	0.482126	TRUE
AP3M1	0.646321	0.169027	TRUE
AP3M2	0.449956	0.433161	TRUE
AP3S1	0.40815	0.297711	TRUE
AP3S2	0.457824	0.465046	TRUE
AP4B1	0.20089	0.0946244	TRUE
AP4E1	0.537124	0.360515	TRUE
AP4M1	0.619219	0.202381	TRUE
AP4S1	0.548989	0.102376	TRUE
AP5B1	0.0951523	0.292036	TRUE
AP5M1	0.327791	0.00574537	TRUE
AP5S1	0.515199	0.0329784	TRUE
AP5Z1	0.346164	0.226172	TRUE
APAF1	0.556318	0.602865	TRUE
APBA1	0.0170642	0.706393	TRUE
APBA2	0.126477	0.666716	FALSE
APBA3	0.269362	0.124788	FALSE
APBB1	0.0634829	0.612312	TRUE
APBB1IP	-0.331028	0.915094	TRUE
APBB2	0.187681	0.609109	FALSE
APC	0.330379	0.464782	TRUE
APCDD1	-0.0559117	0.755707	FALSE
APCS	0.0792211	-0.0618238	FALSE
APEH	0.551757	0.51296	FALSE
APEX1	0.378218	0.308225	TRUE
APEX2	0.246837	0.299105	FALSE
APH1A	0.741881	0.294832	TRUE
API5	0.701522	0.299115	TRUE
APIP	0.324757	0.427844	FALSE
APLF	0.319698	0.376794	FALSE
APLP2	0.124335	0.509004	FALSE
APMAP	0.380249	0.655644	FALSE
APOA1	0.273619	0.0790101	TRUE
APOA2	0.186261	-0.0937068	FALSE
APOA4	0.149045	-0.127901	FALSE
APOA5	0.125681	-0.204124	FALSE
APOB	0.205672	0.0645647	FALSE
APOBEC3A	-0.11535	0.421524	FALSE
APOBEC3B	0.133309	0.821	FALSE
APOBEC3C	0.121756	0.826574	FALSE
APOBEC3D	-0.0240972	0.628733	FALSE
APOBEC3F	0.308181	0.713581	FALSE
APOBEC3G	0.0622123	0.799194	FALSE
APOBR	0.140637	0.796956	FALSE
APOC1	0.237443	0.125955	FALSE
APOC2	0.187722	0.0177785	FALSE
APOC4	0.0884802	0.0396865	FALSE
APOD	-0.212326	0.147675	FALSE
APOE	0.229446	0.563139	FALSE
APOF	0.080363	-0.124288	FALSE
APOH	-0.175592	-0.0258122	FALSE
APOL1	0.142786	0.341585	TRUE
APOL2	0.293552	0.794486	FALSE
APOL3	0.0740173	0.746084	FALSE
APOL6	0.253025	0.764179	FALSE
APOM	0.228705	0.145271	FALSE
APOO	0.332376	0.39013	TRUE
APOOL	-0.113464	0.223298	TRUE
APOPT1	0.374784	0.245127	FALSE
APP	-0.112207	0.726522	TRUE
APPBP2	0.363654	0.122796	FALSE
APPL1	0.511077	0.377939	TRUE
APPL2	0.258313	0.738332	FALSE
APRT	0.306154	0.443684	FALSE
APTX	0.615892	0.45909	FALSE
AQP1	0.0473852	0.268967	TRUE
AQP5	0.123018	0.822425	FALSE
AQR	0.663134	0.19359	TRUE
AR	0.00786238	0.744596	TRUE
ARAF	0.141823	0.360697	TRUE
ARAP1	0.559882	0.425833	FALSE
ARAP2	0.125111	0.392026	FALSE
ARAP3	0.149857	0.596039	FALSE
ARCN1	0.457296	0.509389	FALSE
ARF1	0.714583	0.177779	TRUE
ARF3	0.307933	0.132309	FALSE
ARF4	0.563758	0.40866	FALSE
ARF5	0.755294	0.512343	FALSE
ARF6	0.435944	0.248563	FALSE
ARFGAP1	0.709587	0.393222	FALSE
ARFGAP2	0.642941	0.455786	FALSE
ARFGAP3	0.467856	0.867307	FALSE
ARFGEF1	0.473976	0.579205	FALSE
ARFGEF2	0.661511	0.645258	FALSE
ARFGEF3	-0.156444	0.850054	FALSE
ARFIP1	0.646207	0.69586	FALSE
ARFIP2	0.556565	0.83352	TRUE
ARFRP1	0.730124	0.218589	FALSE
ARG1	-0.167109	-0.0509916	FALSE
ARG2	0.328769	0.67943	FALSE
ARGLU1	0.491337	0.19203	FALSE
ARHGAP1	-0.0476702	0.5894	FALSE
ARHGAP10	0.11095	0.846777	TRUE
ARHGAP12	0.602433	0.814653	FALSE
ARHGAP15	-0.118593	0.818738	FALSE
ARHGAP17	0.286828	0.423199	TRUE
ARHGAP18	0.110627	0.830468	FALSE
ARHGAP21	0.696834	0.790459	FALSE
ARHGAP23	0.231097	0.56028	FALSE
ARHGAP24	-0.0315203	0.451149	FALSE
ARHGAP25	0.259655	0.86171	FALSE
ARHGAP26	0.171708	0.852177	FALSE
ARHGAP27	-0.187486	0.719939	FALSE
ARHGAP28	0.18497	0.0794118	FALSE
ARHGAP29	0.246006	0.773543	FALSE
ARHGAP30	-0.0624988	0.820005	FALSE
ARHGAP31	0.0715346	0.751267	FALSE
ARHGAP32	-0.00151555	0.697686	FALSE
ARHGAP35	0.221687	0.50493	FALSE
ARHGAP39	0.651618	0.243467	FALSE
ARHGAP4	-0.0231001	0.839763	FALSE
ARHGAP42	0.00794553	0.642778	FALSE
ARHGAP44	0.163541	0.681138	FALSE
ARHGAP45	0.0884311	0.735621	FALSE
ARHGAP5	0.169469	0.360833	FALSE
ARHGAP6	0.0408921	0.655212	FALSE
ARHGAP9	0.0488582	0.72558	FALSE
ARHGDIA	0.50151	0.316423	FALSE
ARHGDIB	0.127174	0.808399	FALSE
ARHGEF1	0.395941	0.547765	TRUE
ARHGEF10	0.256087	0.753204	FALSE
ARHGEF10L	0.168899	0.696234	FALSE
ARHGEF11	0.667004	0.479934	FALSE
ARHGEF12	0.200889	0.722932	FALSE
ARHGEF16	-0.00653777	0.827841	FALSE
ARHGEF17	0.277983	0.59461	FALSE
ARHGEF18	0.52517	0.43144	TRUE
ARHGEF19	0.221328	0.207245	FALSE
ARHGEF2	0.654691	0.825426	TRUE
ARHGEF25	0.0728458	0.56254	TRUE
ARHGEF26	-0.122757	0.629083	FALSE
ARHGEF28	0.430952	0.684659	FALSE
ARHGEF3	0.0942799	0.301845	FALSE
ARHGEF35	0.248743	0.612721	FALSE
ARHGEF37	-0.0191885	0.689271	FALSE
ARHGEF38	0.326462	0.678824	FALSE
ARHGEF40	0.133388	0.809333	FALSE
ARHGEF5	0.443134	0.677356	FALSE
ARHGEF6	-0.0546353	0.896122	TRUE
ARHGEF7	0.302723	0.351856	TRUE
ARID1A	0.048684	0.362941	TRUE
ARID1B	0.145855	0.467844	TRUE
ARID2	0.524678	0.720113	TRUE
ARID3A	-0.0807924	0.723376	FALSE
ARID3B	0.219098	0.57341	FALSE
ARID4A	0.213546	0.479177	TRUE
ARID4B	0.753973	0.55025	TRUE
ARID5B	0.455932	0.628503	FALSE
ARIH1	0.465374	0.339122	FALSE
ARIH2	0.740133	0.307124	FALSE
ARL1	0.231012	0.371373	TRUE
ARL13B	0.252479	0.486496	FALSE
ARL14EP	0.619677	0.102205	FALSE
ARL15	0.252079	0.430764	FALSE
ARL2	0.412829	0.397577	TRUE
ARL2BP	0.35322	0.438276	FALSE
ARL3	0.694858	0.784543	FALSE
ARL4A	0.587561	0.235815	FALSE
ARL4C	0.0642498	0.650463	FALSE
ARL4D	0.12738	0.1	FALSE
ARL5A	0.481606	0.0219192	FALSE
ARL5B	0.615344	0.443053	FALSE
ARL6	0.0154196	0.643285	FALSE
ARL6IP1	0.430063	0.12283	FALSE
ARL6IP4	0.481834	0.175571	FALSE
ARL6IP5	0.147768	0.217355	FALSE
ARL6IP6	0.46342	0.35717	FALSE
ARL8A	0.596916	0.430106	FALSE
ARL8B	0.482338	0.312968	FALSE
ARMC1	0.5594	0.390334	FALSE
ARMC10	0.553323	0.453953	FALSE
ARMC3	0.387795	0.913803	FALSE
ARMC4	0.436676	0.727955	FALSE
ARMC5	-0.0395507	0.0140799	FALSE
ARMC6	0.674659	0.504699	FALSE
ARMC7	0.672331	0.153868	FALSE
ARMC8	0.617794	0.513558	TRUE
ARMC9	0.206702	0.585191	FALSE
ARMCX1	-0.12945	0.685817	FALSE
ARMCX2	0.00683555	0.834926	FALSE
ARMCX3	0.211719	0.548437	FALSE
ARMCX5	0.0465588	0.316241	FALSE
ARMH3	0.649003	0.60282	FALSE
ARMT1	0.186827	0.628261	FALSE
ARNT	0.788593	0.557319	TRUE
ARNT2	0.0313002	0.377306	FALSE
ARNTL	0.268104	0.501677	TRUE
ARPC1A	0.64079	0.013099	FALSE
ARPC1B	0.358197	0.711594	TRUE
ARPC2	0.608044	0.600387	TRUE
ARPC3	0.462772	-0.0188513	TRUE
ARPC4	0.689193	0.168647	TRUE
ARPC5	0.744623	0.159886	TRUE
ARPC5L	0.0356029	0.23507	FALSE
ARPIN	0.206933	-0.310014	FALSE
ARPP19	0.49347	0.291073	FALSE
ARR3	0.126825	0.0177016	FALSE
ARRB1	0.168735	0.814784	TRUE
ARRB2	0.109038	0.819305	TRUE
ARRDC1	0.32606	0.352213	FALSE
ARSA	0.122884	0.766092	FALSE
ARSB	0.317165	0.792626	FALSE
ARSD	0.454114	0.538934	FALSE
ARSE	0.381086	0.576343	FALSE
ARSK	0.301597	0.136041	FALSE
ARV1	0.713703	-0.00679095	FALSE
ARVCF	0.176566	0.78381	FALSE
ARX	0.0828848	0.577833	FALSE
AS3MT	0.184985	0.887303	FALSE
ASAH1	0.312688	0.565565	TRUE
ASAP1	0.375839	0.493858	TRUE
ASAP2	0.31662	0.766351	FALSE
ASAP3	0.231541	0.724615	FALSE
ASB1	0.181806	0.227004	TRUE
ASB13	0.411295	0.0431285	FALSE
ASB6	0.234151	0.363083	TRUE
ASB7	0.452844	0.388822	TRUE
ASB8	0.27522	0.341589	FALSE
ASB9	0.220148	0.38947	TRUE
ASCC1	0.776467	0.317867	TRUE
ASCC2	0.412363	0.245169	TRUE
ASCC3	0.259048	0.486364	TRUE
ASDURF	0.0730383	0.233953	FALSE
ASF1A	0.454088	0.531355	TRUE
ASF1B	0.487712	0.855965	TRUE
ASH1L	0.783339	0.230289	FALSE
ASH2L	0.557405	0.466126	TRUE
ASL	0.224213	0.727754	FALSE
ASMTL	0.482245	0.720388	FALSE
ASNA1	0.550136	0.386013	FALSE
ASNS	0.121121	0.794308	FALSE
ASNSD1	0.497663	0.265428	FALSE
ASPA	0.312919	0.369774	FALSE
ASPH	0.0437692	0.509276	FALSE
ASPN	0.19451	0.74592	FALSE
ASPRV1	0.363875	0.345217	FALSE
ASPSCR1	0.382999	0.591761	FALSE
ASRGL1	0.0266976	0.925851	FALSE
ASS1	-0.159176	0.935826	FALSE
ASTE1	0.598425	0.315111	FALSE
ASXL2	0.453255	0.355457	FALSE
ATAD1	0.719423	0.165178	FALSE
ATAD2	0.429435	0.917084	FALSE
ATAD2B	0.585117	0.527214	FALSE
ATAD3A	0.262021	0.441141	FALSE
ATAD3B	0.271486	0.430593	FALSE
ATAT1	0.241923	0.434955	FALSE
ATE1	0.685002	0.683912	FALSE
ATF1	0.339372	0.530671	FALSE
ATF2	0.524741	0.413965	TRUE
ATF3	-0.0603327	0.362609	FALSE
ATF6	0.718713	0.291374	FALSE
ATF6B	0.305791	0.274184	FALSE
ATF7	0.368564	0.418127	FALSE
ATF7IP	0.295134	0.462571	TRUE
ATG10	0.145864	0.144371	FALSE
ATG101	0.588645	0.245071	TRUE
ATG12	0.54831	0.117584	FALSE
ATG13	0.50179	0.36369	TRUE
ATG14	0.464713	0.0581458	TRUE
ATG16L1	0.598422	0.591912	TRUE
ATG2A	0.259122	0.144606	FALSE
ATG2B	0.459409	0.449683	FALSE
ATG3	0.267742	0.502755	FALSE
ATG4A	0.113372	0.532169	FALSE
ATG4B	0.433944	0.355159	FALSE
ATG4C	0.164667	0.334016	FALSE
ATG5	0.361094	0.301237	FALSE
ATG7	0.52129	0.710917	FALSE
ATG9A	0.22504	0.397285	FALSE
ATIC	0.345603	0.640131	FALSE
ATL1	-0.148944	0.626371	TRUE
ATL2	0.493519	0.521785	TRUE
ATL3	0.0370344	0.372187	TRUE
ATM	0.321721	0.488613	TRUE
ATN1	0.412928	0.348007	FALSE
ATOX1	0.2141	0.54607	FALSE
ATP11A	0.149605	0.548408	FALSE
ATP11B	0.25045	0.226134	FALSE
ATP11C	-0.089387	0.306944	FALSE
ATP12A	-0.255036	0.102855	FALSE
ATP13A1	0.528622	0.258443	FALSE
ATP13A2	0.00147168	0.0944997	FALSE
ATP13A3	0.754924	0.37041	FALSE
ATP1A1	-0.177885	0.0519903	FALSE
ATP1A2	-0.137202	0.434699	FALSE
ATP1B1	0.366217	0.262288	TRUE
ATP1B2	0.0796216	0.458038	FALSE
ATP1B3	0.258371	0.392308	FALSE
ATP23	-0.101742	0.261862	FALSE
ATP2A2	0.550303	0.149694	TRUE
ATP2A3	0.0127993	0.667867	FALSE
ATP2B1	0.266642	0.434294	FALSE
ATP2B2	0.117588	-0.00142843	FALSE
ATP2B3	-0.184648	-0.0679903	FALSE
ATP2B4	0.288534	0.389811	FALSE
ATP2C1	0.111618	0.224848	FALSE
ATP2C2	0.401442	0.689808	FALSE
ATP5F1A	0.496336	0.162223	FALSE
ATP5F1B	0.52958	0.0376351	FALSE
ATP5F1C	0.472282	0.0803302	FALSE
ATP5F1D	0.370252	0.186221	FALSE
ATP5F1E	0.561828	-0.113304	FALSE
ATP5IF1	0.415756	0.63736	FALSE
ATP5MC1	0.384062	0.165947	FALSE
ATP5MD	0.52299	-0.0689485	FALSE
ATP5ME	0.477086	0.0792061	FALSE
ATP5MF	0.56223	0.00160421	FALSE
ATP5MF.PTCD1	0.215744	-0.132607	FALSE
ATP5MG	0.462599	0.0986718	FALSE
ATP5MPL	0.53273	0.0098375	FALSE
ATP5PB	0.637284	0.012222	FALSE
ATP5PD	0.587803	-0.109596	FALSE
ATP5PF	0.547113	0.0897193	FALSE
ATP5PO	0.565873	0.184746	FALSE
ATP5S	0.202683	0.332786	FALSE
ATP6AP1	0.283797	0.426738	FALSE
ATP6AP2	0.274618	0.311034	FALSE
ATP6V0A1	0.115793	0.292043	FALSE
ATP6V0A2	0.529572	0.144262	FALSE
ATP6V0C	0.187805	0.211176	TRUE
ATP6V0D1	0.251737	0.358605	TRUE
ATP6V0D2	0.19805	-0.0442859	FALSE
ATP6V1A	0.333553	0.261066	TRUE
ATP6V1B1	0.287271	0.699627	FALSE
ATP6V1B2	0.116191	0.666284	TRUE
ATP6V1C1	0.574857	0.56715	FALSE
ATP6V1C2	0.0236068	0.856051	FALSE
ATP6V1D	0.355029	0.239441	FALSE
ATP6V1E1	0.328497	0.257059	FALSE
ATP6V1E2	0.314434	0.285714	FALSE
ATP6V1F	0.556422	0.589257	FALSE
ATP6V1G1	0.491101	0.0893103	FALSE
ATP6V1G2	0.28511	0.606676	FALSE
ATP6V1H	0.530628	0.407369	FALSE
ATP7A	0.0969501	0.474431	FALSE
ATP7B	0.168081	0.70971	FALSE
ATP8A1	0.0137927	0.478363	FALSE
ATP8B1	0.0667371	0.592829	FALSE
ATP9A	0.069764	0.498629	FALSE
ATP9B	0.183182	0.237941	FALSE
ATPAF1	0.459775	0.586841	FALSE
ATPAF2	0.616357	0.256385	FALSE
ATR	0.383095	0.358664	TRUE
ATRAID	0.481842	0.284193	FALSE
ATRIP	0.598516	0.218193	TRUE
ATRN	0.599087	0.231719	FALSE
ATRX	-0.0963737	0.562719	TRUE
ATXN1	-0.15811	0.579181	TRUE
ATXN10	0.422597	0.543001	FALSE
ATXN1L	0.395246	0.121449	FALSE
ATXN2	0.560214	0.518998	FALSE
ATXN2L	0.330119	0.432552	FALSE
ATXN3	0.464119	0.461292	FALSE
ATXN7	0.399588	0.451681	TRUE
ATXN7L3	0.0703918	0.404349	TRUE
ATXN7L3B	0.289807	0.461129	FALSE
AUH	0.632335	0.656229	FALSE
AUP1	0.363853	0.29558	TRUE
AURKA	0.629595	0.731478	TRUE
AURKB	0.0367087	0.755841	TRUE
AUTS2	0.416533	0.523477	FALSE
AVEN	0.302148	0.61565	FALSE
AVL9	0.550599	0.645345	FALSE
AXIN1	0.188966	0.451909	TRUE
AXL	0.275285	0.163761	FALSE
AZGP1	0.288445	0.143343	TRUE
AZI2	0.424479	0.462227	TRUE
AZU1	-0.00485675	0.0929512	FALSE
B2M	0.0131069	0.706642	FALSE
B3GALNT1	0.427809	0.301324	FALSE
B3GALT5	0.104323	0.567446	FALSE
B3GALT6	0.378263	0.288246	FALSE
B3GAT3	0.333243	0.489208	FALSE
B3GLCT	0.249013	0.825713	FALSE
B3GNT2	0.316243	0.305372	FALSE
B3GNT3	0.137951	0.835021	FALSE
B3GNT7	0.126585	0.835732	FALSE
B3GNTL1	-0.157011	0.35593	FALSE
B4GALNT3	-0.0627472	0.621999	FALSE
B4GALT1	0.166329	0.772961	FALSE
B4GALT3	0.754369	0.249285	FALSE
B4GALT4	-0.0887843	0.625153	FALSE
B4GALT5	0.631883	-0.226672	FALSE
B4GALT7	0.347518	0.374683	FALSE
B4GAT1	0.213111	0.397214	FALSE
B9D1	0.445352	0.59746	FALSE
B9D2	0.220533	0.556188	FALSE
BABAM1	0.556211	0.113657	FALSE
BABAM2	0.315715	0.317139	FALSE
BACE2	-0.3741	0.526585	FALSE
BACH1	0.312883	0.546577	TRUE
BAD	0.590796	0.000895382	FALSE
BAG1	0.322597	0.529391	TRUE
BAG2	0.114352	0.883369	FALSE
BAG3	0.322995	0.492657	FALSE
BAG4	0.660305	0.447831	FALSE
BAG5	0.475908	0.612	TRUE
BAG6	0.38613	0.287749	TRUE
BAHD1	0.342804	0.461388	FALSE
BAIAP2	0.490712	0.914603	FALSE
BAIAP2L1	0.532921	0.838232	FALSE
BAIAP2L2	0.36982	0.750967	FALSE
BAK1	0.398527	0.334458	TRUE
BANF1	0.369234	0.199095	TRUE
BANP	0.0928887	0.0626516	TRUE
BAP1	0.750848	0.350342	FALSE
BARD1	0.201512	0.520771	TRUE
BASP1	0.0395372	0.830143	FALSE
BAX	0.247465	0.462599	TRUE
BAZ1A	0.250711	0.519892	TRUE
BAZ1B	0.66399	0.514222	TRUE
BAZ2A	0.531416	0.468434	TRUE
BAZ2B	0.262675	0.240838	FALSE
BBC3	-0.0580427	0.415857	FALSE
BBIP1	0.657098	0.457212	TRUE
BBOX1	0.069557	0.640194	FALSE
BBS1	0.384211	0.274526	TRUE
BBS2	0.261891	0.633408	TRUE
BBS4	0.457988	0.612032	TRUE
BBS5	-0.283133	0.0342422	TRUE
BBS7	0.518186	0.615478	TRUE
BBS9	0.446906	0.589553	TRUE
BBX	0.292654	0.416012	FALSE
BCAM	0.356647	0.81605	FALSE
BCAP29	0.302559	0.310577	FALSE
BCAP31	0.258095	0.362402	FALSE
BCAR1	0.405554	0.403694	TRUE
BCAR3	0.12899	0.83239	FALSE
BCAS1	-0.134289	0.853363	FALSE
BCAS2	0.487328	-0.140683	TRUE
BCAS3	0.31296	0.61119	FALSE
BCAT1	-0.0946814	0.883594	FALSE
BCAT2	0.435791	0.616974	FALSE
BCCIP	0.627694	0.520544	TRUE
BCHE	0.152733	0.391063	FALSE
BCKDHA	0.302479	0.187174	FALSE
BCKDHB	0.285917	0.556928	FALSE
BCKDK	0.0717583	0.43727	FALSE
BCL10	0.213025	0.118719	TRUE
BCL11A	0.160669	0.556552	FALSE
BCL11B	0.172418	-0.0285714	FALSE
BCL2	0.246848	0.541887	TRUE
BCL2L1	0.423441	0.598925	TRUE
BCL2L11	0.235944	0.409109	FALSE
BCL2L12	0.193226	0.32325	FALSE
BCL2L13	0.594451	0.513779	FALSE
BCL2L14	0.22904	0.824459	FALSE
BCL2L15	-0.0909371	0.869233	FALSE
BCL2L2	0.338618	0.284733	FALSE
BCL3	0.225277	0.499224	TRUE
BCL6	0.272341	0.576888	TRUE
BCL7A	0.117385	0.462431	FALSE
BCL7B	0.64171	0.203548	FALSE
BCL7C	0.243937	0.234963	FALSE
BCL9	0.550667	0.582669	FALSE
BCL9L	0.0981817	0.360698	FALSE
BCLAF1	0.358107	0.320904	FALSE
BCLAF3	0.0711491	0.48893	FALSE
BCOR	0.051293	0.477703	TRUE
BCORL1	-0.105505	0.224293	FALSE
BCR	0.155357	0.687102	FALSE
BCS1L	0.145622	0.308095	FALSE
BDH1	0.155748	0.747199	FALSE
BDH2	0.592115	0.741308	FALSE
BECN1	0.52853	0.0147485	TRUE
BEND3	0.261021	0.706573	FALSE
BEND5	0.211348	0.485301	FALSE
BEND7	0.144085	0.754386	FALSE
BET1	0.205396	0.320662	FALSE
BET1L	0.389342	0.214405	FALSE
BEX5	0.136066	0.380952	FALSE
BGN	-0.0935549	0.580857	FALSE
BHLHE40	0.141827	0.447125	FALSE
BHLHE41	0.323096	0.155087	FALSE
BICC1	0.0776193	0.666785	FALSE
BICD1	-0.0257985	0.676323	FALSE
BICD2	0.253166	0.485282	TRUE
BICDL2	-0.0567875	0.661555	FALSE
BICRA	0.107651	0.0716942	FALSE
BICRAL	-0.0175007	0.377057	FALSE
BID	-0.195477	0.7078	FALSE
BIN1	0.0775329	0.704424	TRUE
BIN2	0.0629149	0.785359	FALSE
BIN3	0.76972	0.497396	FALSE
BIRC2	0.325099	0.0524678	TRUE
BIRC3	0.217903	0.516736	TRUE
BIRC5	0.452642	0.556966	TRUE
BIRC6	0.726351	0.388777	FALSE
BLM	0.110627	0.202509	TRUE
BLMH	0.367387	0.780526	FALSE
BLNK	0.397032	0.717393	TRUE
BLOC1S1	0.445431	0.0850087	TRUE
BLOC1S2	0.497614	0.34364	TRUE
BLOC1S3	0.33437	0.37403	TRUE
BLOC1S4	0.454935	0.0262339	TRUE
BLOC1S5	0.554181	0.0501121	TRUE
BLOC1S6	0.498181	-0.0656402	TRUE
BLVRA	0.15868	0.879051	TRUE
BLVRB	0.355336	0.510417	FALSE
BLZF1	0.766817	0.351941	FALSE
BMF	-0.286991	0.178202	FALSE
BMP1	0.379692	0.548515	FALSE
BMP2K	0.322619	0.662677	FALSE
BMPR1B	0.388229	0.582258	FALSE
BMPR2	0.431163	0.195521	FALSE
BMS1	0.381853	0.29455	FALSE
BMT2	0.408541	0.249255	FALSE
BMX	0.284887	0.414468	FALSE
BNIP1	0.432594	0.0877275	FALSE
BNIP2	0.400921	0.574047	FALSE
BNIP3	0.0664113	0.55806	FALSE
BNIP3L	0.567569	0.434449	FALSE
BOD1	0.482187	0.442251	TRUE
BOD1L1	0.274475	0.452111	TRUE
BOK	0.353821	0.223125	FALSE
BOLA1	0.623443	0.577743	FALSE
BOLA2	0.195828	0.682568	TRUE
BOLA3	0.418444	0.555442	FALSE
BOP1	0.41042	0.732253	TRUE
BORCS5	0.314794	0.230644	TRUE
BORCS6	0.619709	0.400895	TRUE
BORCS7	0.458149	0.396675	TRUE
BORCS8	0.332657	0.0656273	TRUE
BPGM	0.37665	0.385306	FALSE
BPHL	0.202797	0.533203	FALSE
BPI	0.0915067	0.102305	FALSE
BPIFA1	0.157233	-0.948683	FALSE
BPIFB1	-0.229435	0.615843	FALSE
BPIFB2	-0.479905	0.825748	FALSE
BPNT1	0.714821	0.747715	FALSE
BPTF	0.37923	0.437965	TRUE
BRAF	0.515204	0.592754	TRUE
BRAP	0.577943	0.386999	FALSE
BRAT1	0.430137	0.402233	FALSE
BRCC3	0.171062	0.0368617	TRUE
BRD1	0.371255	0.238816	TRUE
BRD2	0.379783	0.59709	FALSE
BRD3	0.312957	0.492585	FALSE
BRD4	0.340606	0.319287	TRUE
BRD7	0.224176	0.193191	TRUE
BRD8	0.361016	0.333322	TRUE
BRD9	0.481839	0.151862	FALSE
BRF1	0.262537	0.284918	TRUE
BRF2	0.571194	0.538025	FALSE
BRI3	0.363711	0.316633	FALSE
BRI3BP	0.341348	0.100062	FALSE
BRIX1	0.313291	0.348183	TRUE
BRK1	0.583119	0.254354	TRUE
BRMS1	0.542692	0.130186	TRUE
BRMS1L	0.576974	0.549972	TRUE
BROX	0.706814	0.624427	FALSE
BRPF1	0.520272	0.292623	TRUE
BRPF3	0.199927	0.0429574	TRUE
BRWD1	0.375592	0.0751239	FALSE
BRWD3	-0.0878583	0.185974	FALSE
BSCL2	0.209968	0.408168	FALSE
BSDC1	0.334049	0.204856	FALSE
BSG	0.339188	0.282698	TRUE
BSPRY	0.21889	0.790375	FALSE
BST1	0.154894	0.543892	FALSE
BST2	0.293285	0.850858	FALSE
BSX	-0.101249	0.786245	FALSE
BTAF1	0.726365	0.39849	FALSE
BTBD1	0.421845	0.353931	FALSE
BTBD10	0.529633	0.385506	FALSE
BTBD11	0.228878	0.750854	FALSE
BTBD2	0.480483	0.229489	FALSE
BTBD9	0.225137	0.0894514	FALSE
BTC	0.0705678	0.0724076	FALSE
BTD	0.129978	0.626922	FALSE
BTF3	0.43785	0.332519	FALSE
BTF3L4	0.256221	0.357346	FALSE
BTG1	0.204413	0.125112	FALSE
BTG2	0.205655	0.516256	FALSE
BTG3	0.436128	0.278701	FALSE
BTK	0.0226078	0.829323	FALSE
BTN2A1	0.623758	0.334526	FALSE
BTN3A1	0.0277671	0.459329	FALSE
BTN3A2	-0.0319454	0.711881	FALSE
BTN3A3	0.0779704	0.592602	FALSE
BTRC	0.790218	0.180216	TRUE
BUB1	0.35426	0.76202	TRUE
BUB1B	0.0912907	0.914521	TRUE
BUB1B.PAK6	0.0932523	0.565064	FALSE
BUB3	0.548679	0.210421	TRUE
[truncated: 9,874 more rows]

## Sheet: S2H.LUAD.corr.table
S2H. Spearman's DNA-RNA Corr and RNA-Pro Corr for each gene in LUAD
[truncated: 10,068 more rows]

[truncated: 3 more sheets: S2I.TCGA.DNA-RNA, S2J.biophysical factors, S2K.other statistic methods]
