# Supplementary material for: Proteogenomic analysis of cancer aneuploidy and normal tissues reveals divergent modes of gene regulation across cellular pathways
Source: eLife. 2022 Sep 21;11:e75227. doi: 10.7554/eLife.75227 (PMC9491860; doi:10.7554/eLife.75227)
Supplement: Supplementary file 3. [file elife-75227-supp3.xlsx]

## Sheet: S3A
Table S3A Genes were assigned to different groups dependeing on their DNA-RNA and RNA-protein correlations.
gene	DNA-RNA Corr	RNA-Pro Corr	group
AAAS	0.546425	0.194209	Group1:High_DNA-RNA_Corr & Low_RNA-Pro_Corr
AASDH	0.60055	0.0200652	Group1:High_DNA-RNA_Corr & Low_RNA-Pro_Corr
AATF	0.53331	0.270463	Group1:High_DNA-RNA_Corr & Low_RNA-Pro_Corr
ABCA7	0.441843	-0.123146	Group1:High_DNA-RNA_Corr & Low_RNA-Pro_Corr
ABCD4	0.58942	0.241943	Group1:High_DNA-RNA_Corr & Low_RNA-Pro_Corr
ABHD13	0.642032	0.193408	Group1:High_DNA-RNA_Corr & Low_RNA-Pro_Corr
ABHD17B	0.605347	0.22987	Group1:High_DNA-RNA_Corr & Low_RNA-Pro_Corr
ABHD18	0.701037	0.106029	Group1:High_DNA-RNA_Corr & Low_RNA-Pro_Corr
ABT1	0.604877	0.306465	Group1:High_DNA-RNA_Corr & Low_RNA-Pro_Corr
ACD	0.444336	0.0367104	Group1:High_DNA-RNA_Corr & Low_RNA-Pro_Corr
ACIN1	0.503808	0.249361	Group1:High_DNA-RNA_Corr & Low_RNA-Pro_Corr
ACTG1	0.445463	0.0808723	Group1:High_DNA-RNA_Corr & Low_RNA-Pro_Corr
ACTR10	0.563148	0.143676	Group1:High_DNA-RNA_Corr & Low_RNA-Pro_Corr
ACTR2	0.462263	0.278799	Group1:High_DNA-RNA_Corr & Low_RNA-Pro_Corr
ACTR3B	0.588454	0.21359	Group1:High_DNA-RNA_Corr & Low_RNA-Pro_Corr
ACTR8	0.452719	0.303438	Group1:High_DNA-RNA_Corr & Low_RNA-Pro_Corr
ACVR1B	0.535325	0.277692	Group1:High_DNA-RNA_Corr & Low_RNA-Pro_Corr
ADCK2	0.622855	0.153021	Group1:High_DNA-RNA_Corr & Low_RNA-Pro_Corr
ADD1	0.50873	0.241238	Group1:High_DNA-RNA_Corr & Low_RNA-Pro_Corr
ADNP2	0.493429	0.270526	Group1:High_DNA-RNA_Corr & Low_RNA-Pro_Corr
ADRM1	0.506186	0.264115	Group1:High_DNA-RNA_Corr & Low_RNA-Pro_Corr
AEBP2	0.621252	0.0999236	Group1:High_DNA-RNA_Corr & Low_RNA-Pro_Corr
AFF1	0.435452	0.280749	Group1:High_DNA-RNA_Corr & Low_RNA-Pro_Corr
AFF4	0.480429	0.120005	Group1:High_DNA-RNA_Corr & Low_RNA-Pro_Corr
AGGF1	0.643452	0.231769	Group1:High_DNA-RNA_Corr & Low_RNA-Pro_Corr
AGO3	0.479955	0.23029	Group1:High_DNA-RNA_Corr & Low_RNA-Pro_Corr
AGPAT1	0.448155	0.280059	Group1:High_DNA-RNA_Corr & Low_RNA-Pro_Corr
AIMP1	0.502455	0.304349	Group1:High_DNA-RNA_Corr & Low_RNA-Pro_Corr
AIMP2	0.437634	0.249706	Group1:High_DNA-RNA_Corr & Low_RNA-Pro_Corr
AKAP11	0.584402	0.237414	Group1:High_DNA-RNA_Corr & Low_RNA-Pro_Corr
AKIP1	0.502809	0.114664	Group1:High_DNA-RNA_Corr & Low_RNA-Pro_Corr
ALG10	0.538189	0.271324	Group1:High_DNA-RNA_Corr & Low_RNA-Pro_Corr
ALG12	0.516397	0.191623	Group1:High_DNA-RNA_Corr & Low_RNA-Pro_Corr
ALG8	0.566401	0.30801	Group1:High_DNA-RNA_Corr & Low_RNA-Pro_Corr
ALKBH4	0.6024	0.285579	Group1:High_DNA-RNA_Corr & Low_RNA-Pro_Corr
ALYREF	0.544578	0.299592	Group1:High_DNA-RNA_Corr & Low_RNA-Pro_Corr
AMBRA1	0.615329	0.124468	Group1:High_DNA-RNA_Corr & Low_RNA-Pro_Corr
AMMECR1L	0.604329	0.247783	Group1:High_DNA-RNA_Corr & Low_RNA-Pro_Corr
AMZ2	0.552413	0.305586	Group1:High_DNA-RNA_Corr & Low_RNA-Pro_Corr
ANAPC1	0.506606	0.210902	Group1:High_DNA-RNA_Corr & Low_RNA-Pro_Corr
ANAPC10	0.467333	0.0695199	Group1:High_DNA-RNA_Corr & Low_RNA-Pro_Corr
ANAPC11	0.496285	0.107263	Group1:High_DNA-RNA_Corr & Low_RNA-Pro_Corr
ANAPC15	0.461074	0.064269	Group1:High_DNA-RNA_Corr & Low_RNA-Pro_Corr
ANAPC2	0.606417	0.25957	Group1:High_DNA-RNA_Corr & Low_RNA-Pro_Corr
ANAPC4	0.511826	0.190048	Group1:High_DNA-RNA_Corr & Low_RNA-Pro_Corr
ANAPC5	0.587018	0.0913216	Group1:High_DNA-RNA_Corr & Low_RNA-Pro_Corr
ANAPC7	0.570659	0.262404	Group1:High_DNA-RNA_Corr & Low_RNA-Pro_Corr
ANKHD1	0.555394	0.239579	Group1:High_DNA-RNA_Corr & Low_RNA-Pro_Corr
ANKRD11	0.459646	0.139153	Group1:High_DNA-RNA_Corr & Low_RNA-Pro_Corr
ANKRD12	0.434539	0.126819	Group1:High_DNA-RNA_Corr & Low_RNA-Pro_Corr
ANKRD13C	0.556572	-0.268284	Group1:High_DNA-RNA_Corr & Low_RNA-Pro_Corr
ANKRD26	0.430681	0.124254	Group1:High_DNA-RNA_Corr & Low_RNA-Pro_Corr
ANKRD39	0.477908	0.144984	Group1:High_DNA-RNA_Corr & Low_RNA-Pro_Corr
ANKRD46	0.578439	0.158562	Group1:High_DNA-RNA_Corr & Low_RNA-Pro_Corr
ANKRD49	0.555763	0.280083	Group1:High_DNA-RNA_Corr & Low_RNA-Pro_Corr
ANKS3	0.517761	0.148768	Group1:High_DNA-RNA_Corr & Low_RNA-Pro_Corr
AOC2	0.507657	-0.0992468	Group1:High_DNA-RNA_Corr & Low_RNA-Pro_Corr
AP1S1	0.478789	0.245282	Group1:High_DNA-RNA_Corr & Low_RNA-Pro_Corr
AP2M1	0.572718	0.19606	Group1:High_DNA-RNA_Corr & Low_RNA-Pro_Corr
AP3M1	0.592637	0.153703	Group1:High_DNA-RNA_Corr & Low_RNA-Pro_Corr
AP5M1	0.549449	0.0987396	Group1:High_DNA-RNA_Corr & Low_RNA-Pro_Corr
AP5S1	0.561856	0.0649314	Group1:High_DNA-RNA_Corr & Low_RNA-Pro_Corr
AP5Z1	0.494022	0.208793	Group1:High_DNA-RNA_Corr & Low_RNA-Pro_Corr
APBA3	0.433234	0.190993	Group1:High_DNA-RNA_Corr & Low_RNA-Pro_Corr
APH1A	0.439438	0.0362244	Group1:High_DNA-RNA_Corr & Low_RNA-Pro_Corr
API5	0.610989	0.290582	Group1:High_DNA-RNA_Corr & Low_RNA-Pro_Corr
APOPT1	0.606565	-0.103498	Group1:High_DNA-RNA_Corr & Low_RNA-Pro_Corr
APPBP2	0.566469	0.274056	Group1:High_DNA-RNA_Corr & Low_RNA-Pro_Corr
AQR	0.604532	0.134407	Group1:High_DNA-RNA_Corr & Low_RNA-Pro_Corr
ARF1	0.535009	0.169912	Group1:High_DNA-RNA_Corr & Low_RNA-Pro_Corr
ARF3	0.48131	0.197134	Group1:High_DNA-RNA_Corr & Low_RNA-Pro_Corr
ARGLU1	0.67188	0.300824	Group1:High_DNA-RNA_Corr & Low_RNA-Pro_Corr
ARHGAP19	0.535477	0.289972	Group1:High_DNA-RNA_Corr & Low_RNA-Pro_Corr
ARHGAP39	0.524517	-0.0157587	Group1:High_DNA-RNA_Corr & Low_RNA-Pro_Corr
ARHGDIA	0.442794	0.288224	Group1:High_DNA-RNA_Corr & Low_RNA-Pro_Corr
ARL14EP	0.536792	0.153687	Group1:High_DNA-RNA_Corr & Low_RNA-Pro_Corr
ARL4A	0.587561	0.235815	Group1:High_DNA-RNA_Corr & Low_RNA-Pro_Corr
ARL6IP4	0.439039	0.226424	Group1:High_DNA-RNA_Corr & Low_RNA-Pro_Corr
ARL6IP6	0.433348	0.0720287	Group1:High_DNA-RNA_Corr & Low_RNA-Pro_Corr
ARL8B	0.459092	0.302907	Group1:High_DNA-RNA_Corr & Low_RNA-Pro_Corr
ARMC2	0.472758	0.0890599	Group1:High_DNA-RNA_Corr & Low_RNA-Pro_Corr
ARPC1A	0.603563	-0.0558966	Group1:High_DNA-RNA_Corr & Low_RNA-Pro_Corr
ARPC4	0.575554	0.233631	Group1:High_DNA-RNA_Corr & Low_RNA-Pro_Corr
ARV1	0.525255	0.177929	Group1:High_DNA-RNA_Corr & Low_RNA-Pro_Corr
ASB1	0.505886	0.225022	Group1:High_DNA-RNA_Corr & Low_RNA-Pro_Corr
ASB7	0.614874	0.253569	Group1:High_DNA-RNA_Corr & Low_RNA-Pro_Corr
ASCC1	0.520958	0.141451	Group1:High_DNA-RNA_Corr & Low_RNA-Pro_Corr
ASCC2	0.507622	0.223508	Group1:High_DNA-RNA_Corr & Low_RNA-Pro_Corr
ASH1L	0.647492	0.157863	Group1:High_DNA-RNA_Corr & Low_RNA-Pro_Corr
ASNSD1	0.541828	0.173862	Group1:High_DNA-RNA_Corr & Low_RNA-Pro_Corr
ASXL1	0.593522	0.3	Group1:High_DNA-RNA_Corr & Low_RNA-Pro_Corr
ASXL2	0.433661	0.148342	Group1:High_DNA-RNA_Corr & Low_RNA-Pro_Corr
ATF6	0.500446	0.193344	Group1:High_DNA-RNA_Corr & Low_RNA-Pro_Corr
ATG101	0.626914	0.26031	Group1:High_DNA-RNA_Corr & Low_RNA-Pro_Corr
ATG12	0.640822	0.167005	Group1:High_DNA-RNA_Corr & Low_RNA-Pro_Corr
ATG14	0.644229	0.27241	Group1:High_DNA-RNA_Corr & Low_RNA-Pro_Corr
ATG4D	0.479694	0.0454545	Group1:High_DNA-RNA_Corr & Low_RNA-Pro_Corr
ATP5C1	0.484317	0.0822707	Group1:High_DNA-RNA_Corr & Low_RNA-Pro_Corr
ATP5E	0.460742	-0.0368642	Group1:High_DNA-RNA_Corr & Low_RNA-Pro_Corr
ATP5F1	0.573838	0.0758528	Group1:High_DNA-RNA_Corr & Low_RNA-Pro_Corr
ATP5F1A	0.496336	0.162223	Group1:High_DNA-RNA_Corr & Low_RNA-Pro_Corr
ATP5F1B	0.52958	0.0376351	Group1:High_DNA-RNA_Corr & Low_RNA-Pro_Corr
ATP5F1C	0.472282	0.0803302	Group1:High_DNA-RNA_Corr & Low_RNA-Pro_Corr
ATP5F1E	0.561828	-0.113304	Group1:High_DNA-RNA_Corr & Low_RNA-Pro_Corr
ATP5H	0.586285	0.163385	Group1:High_DNA-RNA_Corr & Low_RNA-Pro_Corr
ATP5I	0.458498	0.0573764	Group1:High_DNA-RNA_Corr & Low_RNA-Pro_Corr
ATP5J	0.515079	0.138225	Group1:High_DNA-RNA_Corr & Low_RNA-Pro_Corr
ATP5MD	0.52299	-0.0689485	Group1:High_DNA-RNA_Corr & Low_RNA-Pro_Corr
ATP5ME	0.477086	0.0792061	Group1:High_DNA-RNA_Corr & Low_RNA-Pro_Corr
ATP5MF	0.56223	0.00160421	Group1:High_DNA-RNA_Corr & Low_RNA-Pro_Corr
ATP5MG	0.462599	0.0986718	Group1:High_DNA-RNA_Corr & Low_RNA-Pro_Corr
ATP5MPL	0.53273	0.0098375	Group1:High_DNA-RNA_Corr & Low_RNA-Pro_Corr
ATP5O	0.533564	0.10089	Group1:High_DNA-RNA_Corr & Low_RNA-Pro_Corr
ATP5PB	0.637284	0.012222	Group1:High_DNA-RNA_Corr & Low_RNA-Pro_Corr
ATP5PD	0.587803	-0.109596	Group1:High_DNA-RNA_Corr & Low_RNA-Pro_Corr
ATP5PF	0.547113	0.0897193	Group1:High_DNA-RNA_Corr & Low_RNA-Pro_Corr
ATP5PO	0.565873	0.184746	Group1:High_DNA-RNA_Corr & Low_RNA-Pro_Corr
ATP6V1D	0.51655	0.204329	Group1:High_DNA-RNA_Corr & Low_RNA-Pro_Corr
ATP6V1E1	0.431932	0.146228	Group1:High_DNA-RNA_Corr & Low_RNA-Pro_Corr
ATP6V1G1	0.535515	0.093494	Group1:High_DNA-RNA_Corr & Low_RNA-Pro_Corr
ATP6V1H	0.655292	0.255872	Group1:High_DNA-RNA_Corr & Low_RNA-Pro_Corr
ATP9B	0.565347	0.216941	Group1:High_DNA-RNA_Corr & Low_RNA-Pro_Corr
ATPAF2	0.631275	0.227271	Group1:High_DNA-RNA_Corr & Low_RNA-Pro_Corr
ATR	0.553716	0.251483	Group1:High_DNA-RNA_Corr & Low_RNA-Pro_Corr
ATRN	0.602043	0.281546	Group1:High_DNA-RNA_Corr & Low_RNA-Pro_Corr
AXIN1	0.458369	0.135254	Group1:High_DNA-RNA_Corr & Low_RNA-Pro_Corr
AZI2	0.435577	0.289087	Group1:High_DNA-RNA_Corr & Low_RNA-Pro_Corr
B3GALNT2	0.553789	0.092051	Group1:High_DNA-RNA_Corr & Low_RNA-Pro_Corr
B3GALT6	0.44592	0.278705	Group1:High_DNA-RNA_Corr & Low_RNA-Pro_Corr
B4GALT2	0.612493	0.20526	Group1:High_DNA-RNA_Corr & Low_RNA-Pro_Corr
B4GALT3	0.533778	0.272281	Group1:High_DNA-RNA_Corr & Low_RNA-Pro_Corr
BABAM1	0.443156	0.255399	Group1:High_DNA-RNA_Corr & Low_RNA-Pro_Corr
BAG6	0.454154	0.281404	Group1:High_DNA-RNA_Corr & Low_RNA-Pro_Corr
BANF1	0.4387	0.158697	Group1:High_DNA-RNA_Corr & Low_RNA-Pro_Corr
BAP1	0.482489	0.158221	Group1:High_DNA-RNA_Corr & Low_RNA-Pro_Corr
BBIP1	0.520494	0.217476	Group1:High_DNA-RNA_Corr & Low_RNA-Pro_Corr
BBS10	0.48234	-0.0128813	Group1:High_DNA-RNA_Corr & Low_RNA-Pro_Corr
BBS9	0.452095	0.278529	Group1:High_DNA-RNA_Corr & Low_RNA-Pro_Corr
BCAS2	0.501037	0.0673167	Group1:High_DNA-RNA_Corr & Low_RNA-Pro_Corr
BCL2L2.PABPN1	0.604447	-0.242091	Group1:High_DNA-RNA_Corr & Low_RNA-Pro_Corr
BCL7B	0.586353	0.204398	Group1:High_DNA-RNA_Corr & Low_RNA-Pro_Corr
BCLAF1	0.472346	0.22478	Group1:High_DNA-RNA_Corr & Low_RNA-Pro_Corr
BDP1	0.587129	0.163511	Group1:High_DNA-RNA_Corr & Low_RNA-Pro_Corr
BECN1	0.508933	0.150218	Group1:High_DNA-RNA_Corr & Low_RNA-Pro_Corr
BIRC2	0.476545	0.293987	Group1:High_DNA-RNA_Corr & Low_RNA-Pro_Corr
BIRC6	0.514865	0.206994	Group1:High_DNA-RNA_Corr & Low_RNA-Pro_Corr
BLOC1S4	0.534612	0.10203	Group1:High_DNA-RNA_Corr & Low_RNA-Pro_Corr
BLOC1S5	0.611644	0.177131	Group1:High_DNA-RNA_Corr & Low_RNA-Pro_Corr
BLOC1S6	0.591071	0.127723	Group1:High_DNA-RNA_Corr & Low_RNA-Pro_Corr
BLZF1	0.460127	0.255997	Group1:High_DNA-RNA_Corr & Low_RNA-Pro_Corr
BORCS5	0.519032	0.288245	Group1:High_DNA-RNA_Corr & Low_RNA-Pro_Corr
BRD7	0.653688	0.0323236	Group1:High_DNA-RNA_Corr & Low_RNA-Pro_Corr
BRD8	0.490324	0.272182	Group1:High_DNA-RNA_Corr & Low_RNA-Pro_Corr
BRD9	0.586112	0.226	Group1:High_DNA-RNA_Corr & Low_RNA-Pro_Corr
BRIP1	0.466003	0.170107	Group1:High_DNA-RNA_Corr & Low_RNA-Pro_Corr
BRMS1	0.516621	0.0721508	Group1:High_DNA-RNA_Corr & Low_RNA-Pro_Corr
BRPF1	0.449636	0.21881	Group1:High_DNA-RNA_Corr & Low_RNA-Pro_Corr
BRWD1	0.529788	0.0931579	Group1:High_DNA-RNA_Corr & Low_RNA-Pro_Corr
BTAF1	0.521501	0.307169	Group1:High_DNA-RNA_Corr & Low_RNA-Pro_Corr
BTBD1	0.559581	0.193385	Group1:High_DNA-RNA_Corr & Low_RNA-Pro_Corr
BTBD10	0.573948	0.289503	Group1:High_DNA-RNA_Corr & Low_RNA-Pro_Corr
BTBD7	0.728517	0.258551	Group1:High_DNA-RNA_Corr & Low_RNA-Pro_Corr
BTG3	0.435926	0.0262336	Group1:High_DNA-RNA_Corr & Low_RNA-Pro_Corr
BTN2A1	0.55474	0.30784	Group1:High_DNA-RNA_Corr & Low_RNA-Pro_Corr
BTRC	0.704171	0.0814818	Group1:High_DNA-RNA_Corr & Low_RNA-Pro_Corr
BUB3	0.56661	0.0437223	Group1:High_DNA-RNA_Corr & Low_RNA-Pro_Corr
BUD31	0.604277	0.277249	Group1:High_DNA-RNA_Corr & Low_RNA-Pro_Corr
C10orf76	0.525588	0.277748	Group1:High_DNA-RNA_Corr & Low_RNA-Pro_Corr
C10orf88	0.637185	0.179225	Group1:High_DNA-RNA_Corr & Low_RNA-Pro_Corr
C11orf31	0.572482	0.230107	Group1:High_DNA-RNA_Corr & Low_RNA-Pro_Corr
C11orf57	0.478889	0.254963	Group1:High_DNA-RNA_Corr & Low_RNA-Pro_Corr
C12orf4	0.520796	0.044326	Group1:High_DNA-RNA_Corr & Low_RNA-Pro_Corr
C12orf66	0.465101	0.18796	Group1:High_DNA-RNA_Corr & Low_RNA-Pro_Corr
C12orf73	0.478033	0.199029	Group1:High_DNA-RNA_Corr & Low_RNA-Pro_Corr
C14orf166	0.488104	0.251827	Group1:High_DNA-RNA_Corr & Low_RNA-Pro_Corr
C14orf2	0.447207	0.177547	Group1:High_DNA-RNA_Corr & Low_RNA-Pro_Corr
C15orf57	0.630529	0.0798077	Group1:High_DNA-RNA_Corr & Low_RNA-Pro_Corr
C15orf61	0.52033	-0.8	Group1:High_DNA-RNA_Corr & Low_RNA-Pro_Corr
C16orf70	0.651976	0.112875	Group1:High_DNA-RNA_Corr & Low_RNA-Pro_Corr
C16orf72	0.57992	0.0259217	Group1:High_DNA-RNA_Corr & Low_RNA-Pro_Corr
C16orf91	0.495068	0.231838	Group1:High_DNA-RNA_Corr & Low_RNA-Pro_Corr
C17orf47	0.462184	0.212172	Group1:High_DNA-RNA_Corr & Low_RNA-Pro_Corr
C17orf53	0.59646	0.2	Group1:High_DNA-RNA_Corr & Low_RNA-Pro_Corr
C17orf58	0.440898	-0.211881	Group1:High_DNA-RNA_Corr & Low_RNA-Pro_Corr
C17orf62	0.488502	0.20506	Group1:High_DNA-RNA_Corr & Low_RNA-Pro_Corr
C18orf21	0.619507	0.018325	Group1:High_DNA-RNA_Corr & Low_RNA-Pro_Corr
C19orf25	0.434644	0.282416	Group1:High_DNA-RNA_Corr & Low_RNA-Pro_Corr
C19orf52	0.475242	0.0500288	Group1:High_DNA-RNA_Corr & Low_RNA-Pro_Corr
C1orf109	0.610511	0.185484	Group1:High_DNA-RNA_Corr & Low_RNA-Pro_Corr
C1orf131	0.572604	0.148866	Group1:High_DNA-RNA_Corr & Low_RNA-Pro_Corr
C1orf159	0.600237	0.0165301	Group1:High_DNA-RNA_Corr & Low_RNA-Pro_Corr
C1orf174	0.601577	0.262474	Group1:High_DNA-RNA_Corr & Low_RNA-Pro_Corr
C1orf27	0.507226	0.269411	Group1:High_DNA-RNA_Corr & Low_RNA-Pro_Corr
C1orf43	0.660073	0.229455	Group1:High_DNA-RNA_Corr & Low_RNA-Pro_Corr
C1orf52	0.543036	0.151494	Group1:High_DNA-RNA_Corr & Low_RNA-Pro_Corr
C22orf39	0.542305	0.0763284	Group1:High_DNA-RNA_Corr & Low_RNA-Pro_Corr
C2CD3	0.49352	0.243269	Group1:High_DNA-RNA_Corr & Low_RNA-Pro_Corr
C2orf42	0.504244	-0.0410002	Group1:High_DNA-RNA_Corr & Low_RNA-Pro_Corr
C2orf47	0.594482	0.282171	Group1:High_DNA-RNA_Corr & Low_RNA-Pro_Corr
C2orf49	0.563143	0.301774	Group1:High_DNA-RNA_Corr & Low_RNA-Pro_Corr
C2orf68	0.537748	0.134213	Group1:High_DNA-RNA_Corr & Low_RNA-Pro_Corr
C5orf15	0.439728	0.2433	Group1:High_DNA-RNA_Corr & Low_RNA-Pro_Corr
C6orf106	0.494643	0.262206	Group1:High_DNA-RNA_Corr & Low_RNA-Pro_Corr
C6orf120	0.590211	0.271469	Group1:High_DNA-RNA_Corr & Low_RNA-Pro_Corr
C6orf203	0.480092	0.281485	Group1:High_DNA-RNA_Corr & Low_RNA-Pro_Corr
C6orf89	0.571649	0.194682	Group1:High_DNA-RNA_Corr & Low_RNA-Pro_Corr
C7orf26	0.548817	0.113387	Group1:High_DNA-RNA_Corr & Low_RNA-Pro_Corr
C7orf43	0.473478	0.269014	Group1:High_DNA-RNA_Corr & Low_RNA-Pro_Corr
C8orf59	0.601758	0.196471	Group1:High_DNA-RNA_Corr & Low_RNA-Pro_Corr
C8orf76	0.66478	0.160215	Group1:High_DNA-RNA_Corr & Low_RNA-Pro_Corr
CAAP1	0.656498	0.195254	Group1:High_DNA-RNA_Corr & Low_RNA-Pro_Corr
CABIN1	0.474001	0.152203	Group1:High_DNA-RNA_Corr & Low_RNA-Pro_Corr
CACTIN	0.455032	0.276371	Group1:High_DNA-RNA_Corr & Low_RNA-Pro_Corr
CALM3	0.678566	0.116537	Group1:High_DNA-RNA_Corr & Low_RNA-Pro_Corr
CAMLG	0.47572	0.276316	Group1:High_DNA-RNA_Corr & Low_RNA-Pro_Corr
CAPNS1	0.447766	0.280989	Group1:High_DNA-RNA_Corr & Low_RNA-Pro_Corr
CARD19	0.435231	0.260901	Group1:High_DNA-RNA_Corr & Low_RNA-Pro_Corr
CASC3	0.468836	0.231464	Group1:High_DNA-RNA_Corr & Low_RNA-Pro_Corr
CASP8AP2	0.585885	0.0608505	Group1:High_DNA-RNA_Corr & Low_RNA-Pro_Corr
CBLL1	0.617874	0.130339	Group1:High_DNA-RNA_Corr & Low_RNA-Pro_Corr
CBX3	0.537784	0.281867	Group1:High_DNA-RNA_Corr & Low_RNA-Pro_Corr
CCDC115	0.477888	0.0445095	Group1:High_DNA-RNA_Corr & Low_RNA-Pro_Corr
CCDC12	0.466973	0.295539	Group1:High_DNA-RNA_Corr & Low_RNA-Pro_Corr
CCDC130	0.482724	0.160745	Group1:High_DNA-RNA_Corr & Low_RNA-Pro_Corr
CCDC137	0.592559	0.291883	Group1:High_DNA-RNA_Corr & Low_RNA-Pro_Corr
CCDC18	0.503021	0.0871102	Group1:High_DNA-RNA_Corr & Low_RNA-Pro_Corr
CCDC191	0.51352	0.231918	Group1:High_DNA-RNA_Corr & Low_RNA-Pro_Corr
CCDC22	0.437916	0.133165	Group1:High_DNA-RNA_Corr & Low_RNA-Pro_Corr
CCDC59	0.541766	0.255655	Group1:High_DNA-RNA_Corr & Low_RNA-Pro_Corr
CCDC71	0.56776	-0.0696076	Group1:High_DNA-RNA_Corr & Low_RNA-Pro_Corr
CCDC77	0.482023	0.200089	Group1:High_DNA-RNA_Corr & Low_RNA-Pro_Corr
CCDC84	0.550051	0.270062	Group1:High_DNA-RNA_Corr & Low_RNA-Pro_Corr
CCDC90B	0.438457	0.287293	Group1:High_DNA-RNA_Corr & Low_RNA-Pro_Corr
CCDC93	0.436761	0.138221	Group1:High_DNA-RNA_Corr & Low_RNA-Pro_Corr
CCDC96	0.439613	0.2	Group1:High_DNA-RNA_Corr & Low_RNA-Pro_Corr
CCHCR1	0.502596	0.159492	Group1:High_DNA-RNA_Corr & Low_RNA-Pro_Corr
CCNC	0.621626	0.103879	Group1:High_DNA-RNA_Corr & Low_RNA-Pro_Corr
CCNDBP1	0.490693	0.122504	Group1:High_DNA-RNA_Corr & Low_RNA-Pro_Corr
CCNE2	0.489981	0.150798	Group1:High_DNA-RNA_Corr & Low_RNA-Pro_Corr
CCNH	0.607808	0.0626076	Group1:High_DNA-RNA_Corr & Low_RNA-Pro_Corr
CCNK	0.476413	0.147055	Group1:High_DNA-RNA_Corr & Low_RNA-Pro_Corr
CCNL1	0.474486	0.212351	Group1:High_DNA-RNA_Corr & Low_RNA-Pro_Corr
CCNL2	0.501754	0.106712	Group1:High_DNA-RNA_Corr & Low_RNA-Pro_Corr
CCNT2	0.560551	0.289583	Group1:High_DNA-RNA_Corr & Low_RNA-Pro_Corr
CCNY	0.551532	0.289746	Group1:High_DNA-RNA_Corr & Low_RNA-Pro_Corr
CCP110	0.463138	0.288282	Group1:High_DNA-RNA_Corr & Low_RNA-Pro_Corr
CCSAP	0.479635	0.0227079	Group1:High_DNA-RNA_Corr & Low_RNA-Pro_Corr
CCT2	0.481189	0.236629	Group1:High_DNA-RNA_Corr & Low_RNA-Pro_Corr
CCT3	0.484148	0.269423	Group1:High_DNA-RNA_Corr & Low_RNA-Pro_Corr
CCT4	0.52171	0.268195	Group1:High_DNA-RNA_Corr & Low_RNA-Pro_Corr
CCT5	0.481193	0.145546	Group1:High_DNA-RNA_Corr & Low_RNA-Pro_Corr
CCT6A	0.492154	0.238737	Group1:High_DNA-RNA_Corr & Low_RNA-Pro_Corr
CCT7	0.481373	0.143018	Group1:High_DNA-RNA_Corr & Low_RNA-Pro_Corr
CD164	0.501559	0.077784	Group1:High_DNA-RNA_Corr & Low_RNA-Pro_Corr
CD2BP2	0.507818	0.289402	Group1:High_DNA-RNA_Corr & Low_RNA-Pro_Corr
CDC23	0.474374	0.260994	Group1:High_DNA-RNA_Corr & Low_RNA-Pro_Corr
CDC26	0.451881	0.201247	Group1:High_DNA-RNA_Corr & Low_RNA-Pro_Corr
CDC42	0.598211	0.192647	Group1:High_DNA-RNA_Corr & Low_RNA-Pro_Corr
CDK10	0.578214	-0.207839	Group1:High_DNA-RNA_Corr & Low_RNA-Pro_Corr
CDK20	0.501109	0.0372934	Group1:High_DNA-RNA_Corr & Low_RNA-Pro_Corr
CDK4	0.448973	0.308908	Group1:High_DNA-RNA_Corr & Low_RNA-Pro_Corr
CDK5RAP1	0.649353	0.278424	Group1:High_DNA-RNA_Corr & Low_RNA-Pro_Corr
CDK5RAP3	0.438821	0.158055	Group1:High_DNA-RNA_Corr & Low_RNA-Pro_Corr
CDK9	0.502579	0.107863	Group1:High_DNA-RNA_Corr & Low_RNA-Pro_Corr
CDKL3	0.505798	0.0804463	Group1:High_DNA-RNA_Corr & Low_RNA-Pro_Corr
CDKN2B	0.622604	0.288236	Group1:High_DNA-RNA_Corr & Low_RNA-Pro_Corr
CDPF1	0.501625	0.140297	Group1:High_DNA-RNA_Corr & Low_RNA-Pro_Corr
CENPA	0.573712	0.288462	Group1:High_DNA-RNA_Corr & Low_RNA-Pro_Corr
CENPB	0.522035	0.302703	Group1:High_DNA-RNA_Corr & Low_RNA-Pro_Corr
CENPC	0.486473	0.151061	Group1:High_DNA-RNA_Corr & Low_RNA-Pro_Corr
CENPL	0.448257	0.0570414	Group1:High_DNA-RNA_Corr & Low_RNA-Pro_Corr
CENPO	0.451846	0.249103	Group1:High_DNA-RNA_Corr & Low_RNA-Pro_Corr
CENPT	0.508987	-0.0583762	Group1:High_DNA-RNA_Corr & Low_RNA-Pro_Corr
CENPX	0.450112	0.198764	Group1:High_DNA-RNA_Corr & Low_RNA-Pro_Corr
CEP104	0.580572	0.118395	Group1:High_DNA-RNA_Corr & Low_RNA-Pro_Corr
CEP162	0.490367	0.234248	Group1:High_DNA-RNA_Corr & Low_RNA-Pro_Corr
CEP164	0.446165	0.124085	Group1:High_DNA-RNA_Corr & Low_RNA-Pro_Corr
CEP192	0.568699	0.276487	Group1:High_DNA-RNA_Corr & Low_RNA-Pro_Corr
CEP295	0.633675	-0.109625	Group1:High_DNA-RNA_Corr & Low_RNA-Pro_Corr
CEP350	0.58594	0.301678	Group1:High_DNA-RNA_Corr & Low_RNA-Pro_Corr
CEP57	0.56116	0.261085	Group1:High_DNA-RNA_Corr & Low_RNA-Pro_Corr
CEP63	0.496792	0.0531157	Group1:High_DNA-RNA_Corr & Low_RNA-Pro_Corr
CEP83	0.432604	0.301615	Group1:High_DNA-RNA_Corr & Low_RNA-Pro_Corr
CEP95	0.563269	0.187758	Group1:High_DNA-RNA_Corr & Low_RNA-Pro_Corr
CERS5	0.452134	0.178498	Group1:High_DNA-RNA_Corr & Low_RNA-Pro_Corr
CFAP44	0.50095	-0.0646748	Group1:High_DNA-RNA_Corr & Low_RNA-Pro_Corr
CGRRF1	0.552183	0.259479	Group1:High_DNA-RNA_Corr & Low_RNA-Pro_Corr
CHCHD1	0.477864	0.0975063	Group1:High_DNA-RNA_Corr & Low_RNA-Pro_Corr
CHCHD3	0.578207	0.303682	Group1:High_DNA-RNA_Corr & Low_RNA-Pro_Corr
CHCHD7	0.573736	0.219709	Group1:High_DNA-RNA_Corr & Low_RNA-Pro_Corr
CHD9	0.584855	0.16446	Group1:High_DNA-RNA_Corr & Low_RNA-Pro_Corr
CHP1	0.432242	0.228027	Group1:High_DNA-RNA_Corr & Low_RNA-Pro_Corr
CHTOP	0.552979	0.109167	Group1:High_DNA-RNA_Corr & Low_RNA-Pro_Corr
CIAO1	0.5731	0.127273	Group1:High_DNA-RNA_Corr & Low_RNA-Pro_Corr
CIAO2B	0.505232	-0.091933	Group1:High_DNA-RNA_Corr & Low_RNA-Pro_Corr
CINP	0.607626	0.263772	Group1:High_DNA-RNA_Corr & Low_RNA-Pro_Corr
CLDN12	0.480817	0.137749	Group1:High_DNA-RNA_Corr & Low_RNA-Pro_Corr
CLDND1	0.510282	0.19549	Group1:High_DNA-RNA_Corr & Low_RNA-Pro_Corr
CLEC16A	0.442105	0.18439	Group1:High_DNA-RNA_Corr & Low_RNA-Pro_Corr
CLK2	0.561371	0.303093	Group1:High_DNA-RNA_Corr & Low_RNA-Pro_Corr
CLK3	0.514332	0.291554	Group1:High_DNA-RNA_Corr & Low_RNA-Pro_Corr
CLK4	0.623854	0.014903	Group1:High_DNA-RNA_Corr & Low_RNA-Pro_Corr
CLN3	0.52435	0.21655	Group1:High_DNA-RNA_Corr & Low_RNA-Pro_Corr
CLN6	0.533802	0.247852	Group1:High_DNA-RNA_Corr & Low_RNA-Pro_Corr
CLOCK	0.517318	0.293534	Group1:High_DNA-RNA_Corr & Low_RNA-Pro_Corr
CLP1	0.549084	0.111055	Group1:High_DNA-RNA_Corr & Low_RNA-Pro_Corr
CLPX	0.589827	0.284453	Group1:High_DNA-RNA_Corr & Low_RNA-Pro_Corr
CLTA	0.5641	0.239061	Group1:High_DNA-RNA_Corr & Low_RNA-Pro_Corr
CMC1	0.458911	0.246833	Group1:High_DNA-RNA_Corr & Low_RNA-Pro_Corr
CNIH1	0.547557	0.280925	Group1:High_DNA-RNA_Corr & Low_RNA-Pro_Corr
CNIH4	0.485534	0.184605	Group1:High_DNA-RNA_Corr & Low_RNA-Pro_Corr
CNOT1	0.616979	0.309627	Group1:High_DNA-RNA_Corr & Low_RNA-Pro_Corr
CNOT10	0.522747	0.160086	Group1:High_DNA-RNA_Corr & Low_RNA-Pro_Corr
CNOT11	0.451009	0.194835	Group1:High_DNA-RNA_Corr & Low_RNA-Pro_Corr
CNOT2	0.590494	0.255096	Group1:High_DNA-RNA_Corr & Low_RNA-Pro_Corr
CNOT6	0.562634	0.30506	Group1:High_DNA-RNA_Corr & Low_RNA-Pro_Corr
CNOT8	0.514512	0.0798629	Group1:High_DNA-RNA_Corr & Low_RNA-Pro_Corr
CNOT9	0.642763	0.199407	Group1:High_DNA-RNA_Corr & Low_RNA-Pro_Corr
CNTROB	0.478399	0.151921	Group1:High_DNA-RNA_Corr & Low_RNA-Pro_Corr
COA1	0.568747	0.30637	Group1:High_DNA-RNA_Corr & Low_RNA-Pro_Corr
COA5	0.515256	0.263845	Group1:High_DNA-RNA_Corr & Low_RNA-Pro_Corr
COA6	0.485054	0.289086	Group1:High_DNA-RNA_Corr & Low_RNA-Pro_Corr
COG1	0.469425	0.278416	Group1:High_DNA-RNA_Corr & Low_RNA-Pro_Corr
COG2	0.652325	0.292294	Group1:High_DNA-RNA_Corr & Low_RNA-Pro_Corr
COG4	0.575782	0.225485	Group1:High_DNA-RNA_Corr & Low_RNA-Pro_Corr
COG5	0.665451	0.236927	Group1:High_DNA-RNA_Corr & Low_RNA-Pro_Corr
COG8	0.569932	0.206767	Group1:High_DNA-RNA_Corr & Low_RNA-Pro_Corr
COMMD10	0.617927	0.214371	Group1:High_DNA-RNA_Corr & Low_RNA-Pro_Corr
COMMD2	0.490095	0.142081	Group1:High_DNA-RNA_Corr & Low_RNA-Pro_Corr
COMMD4	0.472025	0.116004	Group1:High_DNA-RNA_Corr & Low_RNA-Pro_Corr
COMMD5	0.562069	0.122782	Group1:High_DNA-RNA_Corr & Low_RNA-Pro_Corr
COMMD6	0.522441	0.0220306	Group1:High_DNA-RNA_Corr & Low_RNA-Pro_Corr
COMMD8	0.511316	0.23472	Group1:High_DNA-RNA_Corr & Low_RNA-Pro_Corr
COMMD9	0.472214	0.139473	Group1:High_DNA-RNA_Corr & Low_RNA-Pro_Corr
COPA	0.537148	0.232599	Group1:High_DNA-RNA_Corr & Low_RNA-Pro_Corr
COPB1	0.5704	0.307878	Group1:High_DNA-RNA_Corr & Low_RNA-Pro_Corr
COPS2	0.559887	0.151698	Group1:High_DNA-RNA_Corr & Low_RNA-Pro_Corr
COPS3	0.518194	0.205264	Group1:High_DNA-RNA_Corr & Low_RNA-Pro_Corr
COPS4	0.526051	0.247138	Group1:High_DNA-RNA_Corr & Low_RNA-Pro_Corr
COPS5	0.678525	-0.0307707	Group1:High_DNA-RNA_Corr & Low_RNA-Pro_Corr
COPS6	0.628908	0.0671404	Group1:High_DNA-RNA_Corr & Low_RNA-Pro_Corr
COPS7A	0.575965	0.187298	Group1:High_DNA-RNA_Corr & Low_RNA-Pro_Corr
COPS8	0.593132	0.141225	Group1:High_DNA-RNA_Corr & Low_RNA-Pro_Corr
COPS9	0.502012	-0.0871168	Group1:High_DNA-RNA_Corr & Low_RNA-Pro_Corr
COPZ1	0.535167	0.252534	Group1:High_DNA-RNA_Corr & Low_RNA-Pro_Corr
COQ4	0.498791	-0.119788	Group1:High_DNA-RNA_Corr & Low_RNA-Pro_Corr
COQ5	0.451056	0.152452	Group1:High_DNA-RNA_Corr & Low_RNA-Pro_Corr
COQ6	0.566922	0.23618	Group1:High_DNA-RNA_Corr & Low_RNA-Pro_Corr
COQ7	0.51927	0.287166	Group1:High_DNA-RNA_Corr & Low_RNA-Pro_Corr
COX11	0.503368	0.276533	Group1:High_DNA-RNA_Corr & Low_RNA-Pro_Corr
COX16	0.530148	-0.0488578	Group1:High_DNA-RNA_Corr & Low_RNA-Pro_Corr
COX19	0.535801	0.169057	Group1:High_DNA-RNA_Corr & Low_RNA-Pro_Corr
COX20	0.462827	0.262175	Group1:High_DNA-RNA_Corr & Low_RNA-Pro_Corr
COX4I1	0.575953	0.239648	Group1:High_DNA-RNA_Corr & Low_RNA-Pro_Corr
COX5A	0.452567	0.278003	Group1:High_DNA-RNA_Corr & Low_RNA-Pro_Corr
COX6A1	0.494053	0.0717889	Group1:High_DNA-RNA_Corr & Low_RNA-Pro_Corr
COX6B1	0.448867	0.164583	Group1:High_DNA-RNA_Corr & Low_RNA-Pro_Corr
COX6C	0.561567	0.18103	Group1:High_DNA-RNA_Corr & Low_RNA-Pro_Corr
COX7A2L	0.480071	0.0999698	Group1:High_DNA-RNA_Corr & Low_RNA-Pro_Corr
COX7C	0.572484	0.132816	Group1:High_DNA-RNA_Corr & Low_RNA-Pro_Corr
COX8A	0.454966	0.0544211	Group1:High_DNA-RNA_Corr & Low_RNA-Pro_Corr
CPSF1	0.498464	0.238903	Group1:High_DNA-RNA_Corr & Low_RNA-Pro_Corr
CPSF2	0.620384	0.208524	Group1:High_DNA-RNA_Corr & Low_RNA-Pro_Corr
CPSF4	0.604012	0.185971	Group1:High_DNA-RNA_Corr & Low_RNA-Pro_Corr
CRAMP1	0.476495	0.141687	Group1:High_DNA-RNA_Corr & Low_RNA-Pro_Corr
CRCP	0.630464	0.131694	Group1:High_DNA-RNA_Corr & Low_RNA-Pro_Corr
CREB3L4	0.460136	0.247551	Group1:High_DNA-RNA_Corr & Low_RNA-Pro_Corr
CRIPT	0.453675	0.256509	Group1:High_DNA-RNA_Corr & Low_RNA-Pro_Corr
CRTC2	0.483505	0.260047	Group1:High_DNA-RNA_Corr & Low_RNA-Pro_Corr
CRY2	0.441193	0.194536	Group1:High_DNA-RNA_Corr & Low_RNA-Pro_Corr
CSNK1A1	0.585451	0.308994	Group1:High_DNA-RNA_Corr & Low_RNA-Pro_Corr
CSNK1E	0.565312	0.154811	Group1:High_DNA-RNA_Corr & Low_RNA-Pro_Corr
CSNK1G1	0.547712	0.273961	Group1:High_DNA-RNA_Corr & Low_RNA-Pro_Corr
CSNK1G3	0.602952	0.175143	Group1:High_DNA-RNA_Corr & Low_RNA-Pro_Corr
CSNK2B	0.570576	0.169026	Group1:High_DNA-RNA_Corr & Low_RNA-Pro_Corr
CSPP1	0.673656	0.154535	Group1:High_DNA-RNA_Corr & Low_RNA-Pro_Corr
CSTF2T	0.52185	0.245724	Group1:High_DNA-RNA_Corr & Low_RNA-Pro_Corr
CTBP1	0.564464	0.16389	Group1:High_DNA-RNA_Corr & Low_RNA-Pro_Corr
CTCF	0.468943	0.289681	Group1:High_DNA-RNA_Corr & Low_RNA-Pro_Corr
CTDSP1	0.471058	0.251651	Group1:High_DNA-RNA_Corr & Low_RNA-Pro_Corr
CTNNBL1	0.593875	0.30659	Group1:High_DNA-RNA_Corr & Low_RNA-Pro_Corr
CTR9	0.554017	0.149762	Group1:High_DNA-RNA_Corr & Low_RNA-Pro_Corr
CTU2	0.519305	0.299043	Group1:High_DNA-RNA_Corr & Low_RNA-Pro_Corr
CWC15	0.593071	0.202895	Group1:High_DNA-RNA_Corr & Low_RNA-Pro_Corr
CWC22	0.5004	0.276809	Group1:High_DNA-RNA_Corr & Low_RNA-Pro_Corr
CWC25	0.520745	0.199782	Group1:High_DNA-RNA_Corr & Low_RNA-Pro_Corr
CWC27	0.513265	0.23582	Group1:High_DNA-RNA_Corr & Low_RNA-Pro_Corr
CXXC1	0.610846	0.134547	Group1:High_DNA-RNA_Corr & Low_RNA-Pro_Corr
CYFIP1	0.514805	0.280474	Group1:High_DNA-RNA_Corr & Low_RNA-Pro_Corr
CYHR1	0.651127	0.29686	Group1:High_DNA-RNA_Corr & Low_RNA-Pro_Corr
CYREN	0.552732	0.284753	Group1:High_DNA-RNA_Corr & Low_RNA-Pro_Corr
DAD1	0.516214	0.0482025	Group1:High_DNA-RNA_Corr & Low_RNA-Pro_Corr
DAP3	0.549085	0.282498	Group1:High_DNA-RNA_Corr & Low_RNA-Pro_Corr
DAZAP2	0.551377	0.274277	Group1:High_DNA-RNA_Corr & Low_RNA-Pro_Corr
DCAF12	0.573315	0.0403404	Group1:High_DNA-RNA_Corr & Low_RNA-Pro_Corr
DCAF15	0.48899	0.199004	Group1:High_DNA-RNA_Corr & Low_RNA-Pro_Corr
DCAF7	0.485429	0.254608	Group1:High_DNA-RNA_Corr & Low_RNA-Pro_Corr
DCTN1	0.451482	0.123818	Group1:High_DNA-RNA_Corr & Low_RNA-Pro_Corr
DCTN2	0.595366	0.265786	Group1:High_DNA-RNA_Corr & Low_RNA-Pro_Corr
DCTN3	0.611493	0.0858409	Group1:High_DNA-RNA_Corr & Low_RNA-Pro_Corr
DCTN4	0.660412	0.0927709	Group1:High_DNA-RNA_Corr & Low_RNA-Pro_Corr
DCTN5	0.485629	0.124967	Group1:High_DNA-RNA_Corr & Low_RNA-Pro_Corr
DCTN6	0.663416	0.258493	Group1:High_DNA-RNA_Corr & Low_RNA-Pro_Corr
DCUN1D2	0.56686	0.125091	Group1:High_DNA-RNA_Corr & Low_RNA-Pro_Corr
DDA1	0.458671	0.120195	Group1:High_DNA-RNA_Corr & Low_RNA-Pro_Corr
DDOST	0.509048	0.26973	Group1:High_DNA-RNA_Corr & Low_RNA-Pro_Corr
DDRGK1	0.581171	0.236942	Group1:High_DNA-RNA_Corr & Low_RNA-Pro_Corr
DDX1	0.453279	0.267499	Group1:High_DNA-RNA_Corr & Low_RNA-Pro_Corr
DDX20	0.616453	0.257087	Group1:High_DNA-RNA_Corr & Low_RNA-Pro_Corr
DDX28	0.512267	0.300976	Group1:High_DNA-RNA_Corr & Low_RNA-Pro_Corr
DDX41	0.540714	0.304142	Group1:High_DNA-RNA_Corr & Low_RNA-Pro_Corr
DDX49	0.52197	0.292484	Group1:High_DNA-RNA_Corr & Low_RNA-Pro_Corr
DDX52	0.505798	0.294304	Group1:High_DNA-RNA_Corr & Low_RNA-Pro_Corr
DEDD	0.649658	0.126309	Group1:High_DNA-RNA_Corr & Low_RNA-Pro_Corr
DEF8	0.550943	0.212415	Group1:High_DNA-RNA_Corr & Low_RNA-Pro_Corr
DERA	0.470368	0.172512	Group1:High_DNA-RNA_Corr & Low_RNA-Pro_Corr
DGAT1	0.478185	0.288792	Group1:High_DNA-RNA_Corr & Low_RNA-Pro_Corr
DGCR2	0.513559	0.118407	Group1:High_DNA-RNA_Corr & Low_RNA-Pro_Corr
DGCR6L	0.565804	0.128229	Group1:High_DNA-RNA_Corr & Low_RNA-Pro_Corr
DGCR8	0.433374	0.267724	Group1:High_DNA-RNA_Corr & Low_RNA-Pro_Corr
DGUOK	0.547963	0.135365	Group1:High_DNA-RNA_Corr & Low_RNA-Pro_Corr
DHDDS	0.673771	0.1057	Group1:High_DNA-RNA_Corr & Low_RNA-Pro_Corr
DHRS4L2	0.476789	0.0862142	Group1:High_DNA-RNA_Corr & Low_RNA-Pro_Corr
DHX35	0.575404	0.295326	Group1:High_DNA-RNA_Corr & Low_RNA-Pro_Corr
DIABLO	0.575554	0.294982	Group1:High_DNA-RNA_Corr & Low_RNA-Pro_Corr
DIDO1	0.588603	0.262982	Group1:High_DNA-RNA_Corr & Low_RNA-Pro_Corr
DIRC2	0.43064	0.283207	Group1:High_DNA-RNA_Corr & Low_RNA-Pro_Corr
DIS3L	0.44599	0.0201637	Group1:High_DNA-RNA_Corr & Low_RNA-Pro_Corr
DMAC1	0.509964	0.206255	Group1:High_DNA-RNA_Corr & Low_RNA-Pro_Corr
DMAC2	0.473371	0.151957	Group1:High_DNA-RNA_Corr & Low_RNA-Pro_Corr
DNAH14	0.524471	-0.0442657	Group1:High_DNA-RNA_Corr & Low_RNA-Pro_Corr
DNAJB14	0.530298	0.225769	Group1:High_DNA-RNA_Corr & Low_RNA-Pro_Corr
DNAJB7	0.479037	0.105836	Group1:High_DNA-RNA_Corr & Low_RNA-Pro_Corr
DNAJC16	0.61933	0.296456	Group1:High_DNA-RNA_Corr & Low_RNA-Pro_Corr
DNAJC19	0.509529	0.259125	Group1:High_DNA-RNA_Corr & Low_RNA-Pro_Corr
DNAJC24	0.503506	0.233408	Group1:High_DNA-RNA_Corr & Low_RNA-Pro_Corr
DNAJC30	0.459188	0.241462	Group1:High_DNA-RNA_Corr & Low_RNA-Pro_Corr
DNTTIP1	0.518377	0.0647214	Group1:High_DNA-RNA_Corr & Low_RNA-Pro_Corr
DNTTIP2	0.610505	0.246308	Group1:High_DNA-RNA_Corr & Low_RNA-Pro_Corr
DOK4	0.488521	-0.0340548	Group1:High_DNA-RNA_Corr & Low_RNA-Pro_Corr
DOLK	0.621176	0.253546	Group1:High_DNA-RNA_Corr & Low_RNA-Pro_Corr
DOPEY1	0.473493	0.19128	Group1:High_DNA-RNA_Corr & Low_RNA-Pro_Corr
DPF2	0.528284	0.192835	Group1:High_DNA-RNA_Corr & Low_RNA-Pro_Corr
DPH1	0.52367	0.156608	Group1:High_DNA-RNA_Corr & Low_RNA-Pro_Corr
DPH7	0.522881	0.157308	Group1:High_DNA-RNA_Corr & Low_RNA-Pro_Corr
DPM1	0.562717	0.122906	Group1:High_DNA-RNA_Corr & Low_RNA-Pro_Corr
DPP7	0.448332	0.296405	Group1:High_DNA-RNA_Corr & Low_RNA-Pro_Corr
DPY19L3	0.492977	0.281806	Group1:High_DNA-RNA_Corr & Low_RNA-Pro_Corr
DPY19L4	0.54158	0.265575	Group1:High_DNA-RNA_Corr & Low_RNA-Pro_Corr
DRG1	0.54602	0.190324	Group1:High_DNA-RNA_Corr & Low_RNA-Pro_Corr
DRG2	0.576703	0.275259	Group1:High_DNA-RNA_Corr & Low_RNA-Pro_Corr
DROSHA	0.607785	0.296617	Group1:High_DNA-RNA_Corr & Low_RNA-Pro_Corr
DSCR3	0.606139	0.068342	Group1:High_DNA-RNA_Corr & Low_RNA-Pro_Corr
DSTYK	0.4815	0.263693	Group1:High_DNA-RNA_Corr & Low_RNA-Pro_Corr
DTD2	0.542057	0.25862	Group1:High_DNA-RNA_Corr & Low_RNA-Pro_Corr
DTNBP1	0.485619	0.286902	Group1:High_DNA-RNA_Corr & Low_RNA-Pro_Corr
DTWD1	0.506108	0.173186	Group1:High_DNA-RNA_Corr & Low_RNA-Pro_Corr
DUS4L	0.733752	-0.528897	Group1:High_DNA-RNA_Corr & Low_RNA-Pro_Corr
DVL1	0.438693	0.264604	Group1:High_DNA-RNA_Corr & Low_RNA-Pro_Corr
DVL3	0.535769	0.276828	Group1:High_DNA-RNA_Corr & Low_RNA-Pro_Corr
DXO	0.469729	0.0525856	Group1:High_DNA-RNA_Corr & Low_RNA-Pro_Corr
DYM	0.63497	0.291348	Group1:High_DNA-RNA_Corr & Low_RNA-Pro_Corr
DYNC1I2	0.436024	0.188249	Group1:High_DNA-RNA_Corr & Low_RNA-Pro_Corr
DYNLRB1	0.591152	0.129861	Group1:High_DNA-RNA_Corr & Low_RNA-Pro_Corr
DYNLT1	0.479069	0.234464	Group1:High_DNA-RNA_Corr & Low_RNA-Pro_Corr
DZANK1	0.743392	0.0914729	Group1:High_DNA-RNA_Corr & Low_RNA-Pro_Corr
DZIP1L	0.450155	-0.458222	Group1:High_DNA-RNA_Corr & Low_RNA-Pro_Corr
E2F6	0.624862	0.0570552	Group1:High_DNA-RNA_Corr & Low_RNA-Pro_Corr
E4F1	0.452166	0.0598849	Group1:High_DNA-RNA_Corr & Low_RNA-Pro_Corr
EAF1	0.495064	0.24287	Group1:High_DNA-RNA_Corr & Low_RNA-Pro_Corr
EAF2	0.447674	0.144855	Group1:High_DNA-RNA_Corr & Low_RNA-Pro_Corr
EAPP	0.628038	0.281569	Group1:High_DNA-RNA_Corr & Low_RNA-Pro_Corr
EBNA1BP2	0.521504	0.251125	Group1:High_DNA-RNA_Corr & Low_RNA-Pro_Corr
ECD	0.613521	0.21784	Group1:High_DNA-RNA_Corr & Low_RNA-Pro_Corr
EDEM1	0.539739	0.025924	Group1:High_DNA-RNA_Corr & Low_RNA-Pro_Corr
EDEM2	0.545749	0.264233	Group1:High_DNA-RNA_Corr & Low_RNA-Pro_Corr
EDEM3	0.487092	0.304603	Group1:High_DNA-RNA_Corr & Low_RNA-Pro_Corr
EDRF1	0.584661	0.151148	Group1:High_DNA-RNA_Corr & Low_RNA-Pro_Corr
EEF1D	0.47288	0.233038	Group1:High_DNA-RNA_Corr & Low_RNA-Pro_Corr
EEF2	0.457252	0.198375	Group1:High_DNA-RNA_Corr & Low_RNA-Pro_Corr
EFR3A	0.542584	0.289106	Group1:High_DNA-RNA_Corr & Low_RNA-Pro_Corr
EFTUD2	0.50466	0.262162	Group1:High_DNA-RNA_Corr & Low_RNA-Pro_Corr
EHMT2	0.469005	0.273829	Group1:High_DNA-RNA_Corr & Low_RNA-Pro_Corr
EIF1	0.52596	0.235533	Group1:High_DNA-RNA_Corr & Low_RNA-Pro_Corr
EIF1AD	0.45519	0.270005	Group1:High_DNA-RNA_Corr & Low_RNA-Pro_Corr
EIF1B	0.455797	0.262697	Group1:High_DNA-RNA_Corr & Low_RNA-Pro_Corr
EIF2B2	0.61401	0.236843	Group1:High_DNA-RNA_Corr & Low_RNA-Pro_Corr
EIF2B4	0.485556	0.140312	Group1:High_DNA-RNA_Corr & Low_RNA-Pro_Corr
EIF2B5	0.670676	0.2311	Group1:High_DNA-RNA_Corr & Low_RNA-Pro_Corr
EIF2S3	0.500971	0.183795	Group1:High_DNA-RNA_Corr & Low_RNA-Pro_Corr
EIF3D	0.508616	0.144312	Group1:High_DNA-RNA_Corr & Low_RNA-Pro_Corr
EIF3E	0.53271	0.117054	Group1:High_DNA-RNA_Corr & Low_RNA-Pro_Corr
EIF3F	0.546236	0.0880882	Group1:High_DNA-RNA_Corr & Low_RNA-Pro_Corr
EIF3G	0.494059	0.247355	Group1:High_DNA-RNA_Corr & Low_RNA-Pro_Corr
EIF3H	0.639675	0.254702	Group1:High_DNA-RNA_Corr & Low_RNA-Pro_Corr
EIF3I	0.615199	0.105757	Group1:High_DNA-RNA_Corr & Low_RNA-Pro_Corr
EIF3K	0.516441	0.185794	Group1:High_DNA-RNA_Corr & Low_RNA-Pro_Corr
EIF3L	0.478783	0.127814	Group1:High_DNA-RNA_Corr & Low_RNA-Pro_Corr
EIF3M	0.461124	0.197277	Group1:High_DNA-RNA_Corr & Low_RNA-Pro_Corr
EIF4E2	0.524443	0.203809	Group1:High_DNA-RNA_Corr & Low_RNA-Pro_Corr
EIF4EBP2	0.461666	0.274055	Group1:High_DNA-RNA_Corr & Low_RNA-Pro_Corr
EIPR1	0.455051	0.212028	Group1:High_DNA-RNA_Corr & Low_RNA-Pro_Corr
ELF2	0.540749	0.216334	Group1:High_DNA-RNA_Corr & Low_RNA-Pro_Corr
ELK4	0.61792	0.294841	Group1:High_DNA-RNA_Corr & Low_RNA-Pro_Corr
ELMO2	0.509145	0.30183	Group1:High_DNA-RNA_Corr & Low_RNA-Pro_Corr
ELMOD3	0.606383	-0.4	Group1:High_DNA-RNA_Corr & Low_RNA-Pro_Corr
ELOB	0.518734	0.260737	Group1:High_DNA-RNA_Corr & Low_RNA-Pro_Corr
ELOC	0.650036	0.291636	Group1:High_DNA-RNA_Corr & Low_RNA-Pro_Corr
ELOF1	0.500074	0.175352	Group1:High_DNA-RNA_Corr & Low_RNA-Pro_Corr
ELP2	0.573889	0.254083	Group1:High_DNA-RNA_Corr & Low_RNA-Pro_Corr
ELP4	0.541498	0.270914	Group1:High_DNA-RNA_Corr & Low_RNA-Pro_Corr
ELP5	0.603086	0.159694	Group1:High_DNA-RNA_Corr & Low_RNA-Pro_Corr
EMC1	0.512379	0.171331	Group1:High_DNA-RNA_Corr & Low_RNA-Pro_Corr
EMC2	0.668083	0.0352792	Group1:High_DNA-RNA_Corr & Low_RNA-Pro_Corr
EMC3	0.433215	0.149969	Group1:High_DNA-RNA_Corr & Low_RNA-Pro_Corr
EMC4	0.601752	0.0560192	Group1:High_DNA-RNA_Corr & Low_RNA-Pro_Corr
EMC7	0.565129	0.213951	Group1:High_DNA-RNA_Corr & Low_RNA-Pro_Corr
EMC8	0.512965	0.291838	Group1:High_DNA-RNA_Corr & Low_RNA-Pro_Corr
EMC9	0.451996	0.0156168	Group1:High_DNA-RNA_Corr & Low_RNA-Pro_Corr
EML5	0.458758	-0.228982	Group1:High_DNA-RNA_Corr & Low_RNA-Pro_Corr
ENOX2	0.582014	0.154248	Group1:High_DNA-RNA_Corr & Low_RNA-Pro_Corr
ENTPD7	0.465982	0.268605	Group1:High_DNA-RNA_Corr & Low_RNA-Pro_Corr
ENY2	0.639343	0.284514	Group1:High_DNA-RNA_Corr & Low_RNA-Pro_Corr
ERCC1	0.506729	0.138486	Group1:High_DNA-RNA_Corr & Low_RNA-Pro_Corr
ERCC3	0.654792	0.246694	Group1:High_DNA-RNA_Corr & Low_RNA-Pro_Corr
ERCC8	0.505463	0.296549	Group1:High_DNA-RNA_Corr & Low_RNA-Pro_Corr
ERG28	0.513532	0.298356	Group1:High_DNA-RNA_Corr & Low_RNA-Pro_Corr
ERGIC3	0.617481	0.251746	Group1:High_DNA-RNA_Corr & Low_RNA-Pro_Corr
ERH	0.581839	0.110321	Group1:High_DNA-RNA_Corr & Low_RNA-Pro_Corr
EXD3	0.46826	-0.0297006	Group1:High_DNA-RNA_Corr & Low_RNA-Pro_Corr
EXOC1	0.579366	0.274252	Group1:High_DNA-RNA_Corr & Low_RNA-Pro_Corr
EXOC2	0.492991	0.207823	Group1:High_DNA-RNA_Corr & Low_RNA-Pro_Corr
EXOC3	0.529979	0.20187	Group1:High_DNA-RNA_Corr & Low_RNA-Pro_Corr
EXOC4	0.611592	0.223982	Group1:High_DNA-RNA_Corr & Low_RNA-Pro_Corr
EXOC5	0.601982	0.288438	Group1:High_DNA-RNA_Corr & Low_RNA-Pro_Corr
EXOC7	0.526874	0.124883	Group1:High_DNA-RNA_Corr & Low_RNA-Pro_Corr
EXOC8	0.637284	0.141308	Group1:High_DNA-RNA_Corr & Low_RNA-Pro_Corr
EXOSC1	0.573704	0.0946413	Group1:High_DNA-RNA_Corr & Low_RNA-Pro_Corr
EXOSC3	0.590027	0.168327	Group1:High_DNA-RNA_Corr & Low_RNA-Pro_Corr
EXOSC4	0.542317	0.0445066	Group1:High_DNA-RNA_Corr & Low_RNA-Pro_Corr
EXOSC5	0.441246	0.222046	Group1:High_DNA-RNA_Corr & Low_RNA-Pro_Corr
EXOSC6	0.489829	0.100452	Group1:High_DNA-RNA_Corr & Low_RNA-Pro_Corr
EXOSC9	0.522206	0.307248	Group1:High_DNA-RNA_Corr & Low_RNA-Pro_Corr
EXT2	0.459589	0.273102	Group1:High_DNA-RNA_Corr & Low_RNA-Pro_Corr
FAAP100	0.473697	0.238212	Group1:High_DNA-RNA_Corr & Low_RNA-Pro_Corr
FAM103A1	0.530127	0.113063	Group1:High_DNA-RNA_Corr & Low_RNA-Pro_Corr
FAM104A	0.519435	0.19515	Group1:High_DNA-RNA_Corr & Low_RNA-Pro_Corr
FAM122A	0.566579	0.238792	Group1:High_DNA-RNA_Corr & Low_RNA-Pro_Corr
FAM126B	0.471581	0.2699	Group1:High_DNA-RNA_Corr & Low_RNA-Pro_Corr
FAM133B	0.46963	0.182892	Group1:High_DNA-RNA_Corr & Low_RNA-Pro_Corr
FAM134C	0.600313	0.197015	Group1:High_DNA-RNA_Corr & Low_RNA-Pro_Corr
FAM13B	0.665801	-0.0461454	Group1:High_DNA-RNA_Corr & Low_RNA-Pro_Corr
FAM160A2	0.552841	0.288868	Group1:High_DNA-RNA_Corr & Low_RNA-Pro_Corr
FAM173B	0.546864	0.0188034	Group1:High_DNA-RNA_Corr & Low_RNA-Pro_Corr
FAM175B	0.538058	0.294644	Group1:High_DNA-RNA_Corr & Low_RNA-Pro_Corr
FAM185A	0.613734	0.299734	Group1:High_DNA-RNA_Corr & Low_RNA-Pro_Corr
FAM189B	0.527114	-0.0278638	Group1:High_DNA-RNA_Corr & Low_RNA-Pro_Corr
FAM193A	0.454982	0.293762	Group1:High_DNA-RNA_Corr & Low_RNA-Pro_Corr
FAM193B	0.530769	0.0754444	Group1:High_DNA-RNA_Corr & Low_RNA-Pro_Corr
FAM204A	0.595644	0.286065	Group1:High_DNA-RNA_Corr & Low_RNA-Pro_Corr
FAM206A	0.58942	0.0955968	Group1:High_DNA-RNA_Corr & Low_RNA-Pro_Corr
FAM214B	0.607931	0.0330769	Group1:High_DNA-RNA_Corr & Low_RNA-Pro_Corr
FAM219B	0.463303	0.29772	Group1:High_DNA-RNA_Corr & Low_RNA-Pro_Corr
FAM21C	0.537776	0.218752	Group1:High_DNA-RNA_Corr & Low_RNA-Pro_Corr
FAM222B	0.497747	0.037524	Group1:High_DNA-RNA_Corr & Low_RNA-Pro_Corr
FAM234B	0.44374	0.041958	Group1:High_DNA-RNA_Corr & Low_RNA-Pro_Corr
FAM32A	0.512279	0.287412	Group1:High_DNA-RNA_Corr & Low_RNA-Pro_Corr
FAM76A	0.546921	0.236022	Group1:High_DNA-RNA_Corr & Low_RNA-Pro_Corr
FAM92A	0.431376	0.267785	Group1:High_DNA-RNA_Corr & Low_RNA-Pro_Corr
FAM96A	0.453493	0.243969	Group1:High_DNA-RNA_Corr & Low_RNA-Pro_Corr
FAM96B	0.526668	0.0690791	Group1:High_DNA-RNA_Corr & Low_RNA-Pro_Corr
FAN1	0.501349	-0.0618288	Group1:High_DNA-RNA_Corr & Low_RNA-Pro_Corr
FANCA	0.46635	0.277124	Group1:High_DNA-RNA_Corr & Low_RNA-Pro_Corr
FANCB	0.46858	0.206494	Group1:High_DNA-RNA_Corr & Low_RNA-Pro_Corr
FANCG	0.506152	0.0325003	Group1:High_DNA-RNA_Corr & Low_RNA-Pro_Corr
FARSA	0.486353	0.165254	Group1:High_DNA-RNA_Corr & Low_RNA-Pro_Corr
FASTK	0.655112	0.0172378	Group1:High_DNA-RNA_Corr & Low_RNA-Pro_Corr
FASTKD2	0.563762	0.255543	Group1:High_DNA-RNA_Corr & Low_RNA-Pro_Corr
FASTKD3	0.569605	0.205863	Group1:High_DNA-RNA_Corr & Low_RNA-Pro_Corr
FAU	0.435514	0.084296	Group1:High_DNA-RNA_Corr & Low_RNA-Pro_Corr
FBRS	0.440621	0.201673	Group1:High_DNA-RNA_Corr & Low_RNA-Pro_Corr
FBXL12	0.530101	0.178707	Group1:High_DNA-RNA_Corr & Low_RNA-Pro_Corr
FBXL14	0.481831	0.0647059	Group1:High_DNA-RNA_Corr & Low_RNA-Pro_Corr
FBXL2	0.438157	0.285142	Group1:High_DNA-RNA_Corr & Low_RNA-Pro_Corr
FBXL3	0.64823	0.175016	Group1:High_DNA-RNA_Corr & Low_RNA-Pro_Corr
FBXL4	0.579206	0.233262	Group1:High_DNA-RNA_Corr & Low_RNA-Pro_Corr
FBXO11	0.585415	0.228795	Group1:High_DNA-RNA_Corr & Low_RNA-Pro_Corr
FBXO28	0.556412	0.190704	Group1:High_DNA-RNA_Corr & Low_RNA-Pro_Corr
FBXO31	0.486684	0.244388	Group1:High_DNA-RNA_Corr & Low_RNA-Pro_Corr
FBXO33	0.668752	0.176611	Group1:High_DNA-RNA_Corr & Low_RNA-Pro_Corr
FBXO38	0.673919	0.309527	Group1:High_DNA-RNA_Corr & Low_RNA-Pro_Corr
FBXO45	0.520405	0.189223	Group1:High_DNA-RNA_Corr & Low_RNA-Pro_Corr
FBXO9	0.464551	0.173087	Group1:High_DNA-RNA_Corr & Low_RNA-Pro_Corr
FBXW11	0.651039	0.214392	Group1:High_DNA-RNA_Corr & Low_RNA-Pro_Corr
FBXW8	0.556114	0.168764	Group1:High_DNA-RNA_Corr & Low_RNA-Pro_Corr
FCF1	0.656748	0.0310802	Group1:High_DNA-RNA_Corr & Low_RNA-Pro_Corr
FEM1A	0.45735	0.247023	Group1:High_DNA-RNA_Corr & Low_RNA-Pro_Corr
FEM1B	0.564656	0.145075	Group1:High_DNA-RNA_Corr & Low_RNA-Pro_Corr
FGFR1OP2	0.443517	0.0768138	Group1:High_DNA-RNA_Corr & Low_RNA-Pro_Corr
FIBP	0.504014	0.0161049	Group1:High_DNA-RNA_Corr & Low_RNA-Pro_Corr
FIG4	0.59343	0.176025	Group1:High_DNA-RNA_Corr & Low_RNA-Pro_Corr
FIGNL1	0.513395	0.258983	Group1:High_DNA-RNA_Corr & Low_RNA-Pro_Corr
FIP1L1	0.657381	0.280749	Group1:High_DNA-RNA_Corr & Low_RNA-Pro_Corr
FIZ1	0.475732	0.242486	Group1:High_DNA-RNA_Corr & Low_RNA-Pro_Corr
FKBPL	0.571725	0.253084	Group1:High_DNA-RNA_Corr & Low_RNA-Pro_Corr
FLCN	0.471736	0.275244	Group1:High_DNA-RNA_Corr & Low_RNA-Pro_Corr
FLII	0.457108	0.193708	Group1:High_DNA-RNA_Corr & Low_RNA-Pro_Corr
FLOT1	0.456916	0.308434	Group1:High_DNA-RNA_Corr & Low_RNA-Pro_Corr
FNIP1	0.582966	0.153335	Group1:High_DNA-RNA_Corr & Low_RNA-Pro_Corr
FOPNL	0.461787	0.308428	Group1:High_DNA-RNA_Corr & Low_RNA-Pro_Corr
FOXN3	0.475906	0.262113	Group1:High_DNA-RNA_Corr & Low_RNA-Pro_Corr
FRS2	0.503488	0.289664	Group1:High_DNA-RNA_Corr & Low_RNA-Pro_Corr
FSD2	0.453697	0.258175	Group1:High_DNA-RNA_Corr & Low_RNA-Pro_Corr
FYTTD1	0.483971	0.298467	Group1:High_DNA-RNA_Corr & Low_RNA-Pro_Corr
G6PC3	0.432809	0.201391	Group1:High_DNA-RNA_Corr & Low_RNA-Pro_Corr
GABARAP	0.560189	0.211219	Group1:High_DNA-RNA_Corr & Low_RNA-Pro_Corr
GABPA	0.556001	0.156478	Group1:High_DNA-RNA_Corr & Low_RNA-Pro_Corr
GAPDHS	0.51202	-0.13444	Group1:High_DNA-RNA_Corr & Low_RNA-Pro_Corr
GAS8	0.584238	0.175212	Group1:High_DNA-RNA_Corr & Low_RNA-Pro_Corr
GATAD1	0.593909	0.184088	Group1:High_DNA-RNA_Corr & Low_RNA-Pro_Corr
GATB	0.59017	0.200762	Group1:High_DNA-RNA_Corr & Low_RNA-Pro_Corr
GATC	0.451047	0.0211153	Group1:High_DNA-RNA_Corr & Low_RNA-Pro_Corr
GATD1	0.430408	-0.145266	Group1:High_DNA-RNA_Corr & Low_RNA-Pro_Corr
GDAP2	0.436594	0.275623	Group1:High_DNA-RNA_Corr & Low_RNA-Pro_Corr
GEMIN4	0.473977	0.24192	Group1:High_DNA-RNA_Corr & Low_RNA-Pro_Corr
GEMIN6	0.447274	0.143013	Group1:High_DNA-RNA_Corr & Low_RNA-Pro_Corr
GEMIN7	0.443678	0.0685256	Group1:High_DNA-RNA_Corr & Low_RNA-Pro_Corr
GGA3	0.473778	0.285155	Group1:High_DNA-RNA_Corr & Low_RNA-Pro_Corr
GGNBP2	0.493298	0.176118	Group1:High_DNA-RNA_Corr & Low_RNA-Pro_Corr
GID8	0.661642	0.20828	Group1:High_DNA-RNA_Corr & Low_RNA-Pro_Corr
GLE1	0.649678	0.163278	Group1:High_DNA-RNA_Corr & Low_RNA-Pro_Corr
GLI2	0.507936	0.251534	Group1:High_DNA-RNA_Corr & Low_RNA-Pro_Corr
GLYR1	0.617442	0.297518	Group1:High_DNA-RNA_Corr & Low_RNA-Pro_Corr
GMCL1	0.532041	-0.00987737	Group1:High_DNA-RNA_Corr & Low_RNA-Pro_Corr
GMEB2	0.50827	0.256474	Group1:High_DNA-RNA_Corr & Low_RNA-Pro_Corr
GNAS	0.462569	0.247233	Group1:High_DNA-RNA_Corr & Low_RNA-Pro_Corr
GNB1	0.587449	0.139516	Group1:High_DNA-RNA_Corr & Low_RNA-Pro_Corr
GNB2	0.545781	0.209207	Group1:High_DNA-RNA_Corr & Low_RNA-Pro_Corr
GNG5	0.503061	0.0461478	Group1:High_DNA-RNA_Corr & Low_RNA-Pro_Corr
GNL3L	0.436341	0.256813	Group1:High_DNA-RNA_Corr & Low_RNA-Pro_Corr
GNPTG	0.521038	0.222364	Group1:High_DNA-RNA_Corr & Low_RNA-Pro_Corr
GOLGA7	0.736772	0.228723	Group1:High_DNA-RNA_Corr & Low_RNA-Pro_Corr
GON4L	0.601371	0.255404	Group1:High_DNA-RNA_Corr & Low_RNA-Pro_Corr
GORASP1	0.506179	0.246601	Group1:High_DNA-RNA_Corr & Low_RNA-Pro_Corr
GPAA1	0.601941	0.207448	Group1:High_DNA-RNA_Corr & Low_RNA-Pro_Corr
GPATCH2	0.573412	0.308769	Group1:High_DNA-RNA_Corr & Low_RNA-Pro_Corr
GPBP1	0.653839	0.204841	Group1:High_DNA-RNA_Corr & Low_RNA-Pro_Corr
GPBP1L1	0.642794	0.237188	Group1:High_DNA-RNA_Corr & Low_RNA-Pro_Corr
GPN1	0.552823	0.144238	Group1:High_DNA-RNA_Corr & Low_RNA-Pro_Corr
GPN2	0.580422	0.174513	Group1:High_DNA-RNA_Corr & Low_RNA-Pro_Corr
GPR137B	0.544315	0.285447	Group1:High_DNA-RNA_Corr & Low_RNA-Pro_Corr
GPS1	0.61965	0.053988	Group1:High_DNA-RNA_Corr & Low_RNA-Pro_Corr
GPS2	0.500634	0.14866	Group1:High_DNA-RNA_Corr & Low_RNA-Pro_Corr
GSK3A	0.45579	0.287864	Group1:High_DNA-RNA_Corr & Low_RNA-Pro_Corr
GTF2A2	0.552856	0.0644773	Group1:High_DNA-RNA_Corr & Low_RNA-Pro_Corr
GTF2E1	0.61452	0.297462	Group1:High_DNA-RNA_Corr & Low_RNA-Pro_Corr
GTF2F1	0.462164	0.192567	Group1:High_DNA-RNA_Corr & Low_RNA-Pro_Corr
GTF2H3	0.464568	-0.0432795	Group1:High_DNA-RNA_Corr & Low_RNA-Pro_Corr
GTF2H4	0.516451	0.134008	Group1:High_DNA-RNA_Corr & Low_RNA-Pro_Corr
GTF3C3	0.566291	0.210358	Group1:High_DNA-RNA_Corr & Low_RNA-Pro_Corr
GTF3C6	0.468443	0.164277	Group1:High_DNA-RNA_Corr & Low_RNA-Pro_Corr
GTPBP10	0.621974	0.264759	Group1:High_DNA-RNA_Corr & Low_RNA-Pro_Corr
GTPBP8	0.531636	0.257938	Group1:High_DNA-RNA_Corr & Low_RNA-Pro_Corr
GUCD1	0.632918	-0.160839	Group1:High_DNA-RNA_Corr & Low_RNA-Pro_Corr
GZF1	0.611165	0.276671	Group1:High_DNA-RNA_Corr & Low_RNA-Pro_Corr
H2AFV	0.559687	0.163149	Group1:High_DNA-RNA_Corr & Low_RNA-Pro_Corr
HAUS1	0.46418	0.308884	Group1:High_DNA-RNA_Corr & Low_RNA-Pro_Corr
HAUS2	0.56599	0.250595	Group1:High_DNA-RNA_Corr & Low_RNA-Pro_Corr
HAUS3	0.582536	0.121092	Group1:High_DNA-RNA_Corr & Low_RNA-Pro_Corr
HAUS5	0.456232	0.251531	Group1:High_DNA-RNA_Corr & Low_RNA-Pro_Corr
HAX1	0.490984	0.30872	Group1:High_DNA-RNA_Corr & Low_RNA-Pro_Corr
HCN3	0.503709	0.0965814	Group1:High_DNA-RNA_Corr & Low_RNA-Pro_Corr
HDAC3	0.552605	0.0868119	Group1:High_DNA-RNA_Corr & Low_RNA-Pro_Corr
HECTD1	0.623462	0.159181	Group1:High_DNA-RNA_Corr & Low_RNA-Pro_Corr
HERPUD2	0.579905	0.279017	Group1:High_DNA-RNA_Corr & Low_RNA-Pro_Corr
HGS	0.557055	0.170469	Group1:High_DNA-RNA_Corr & Low_RNA-Pro_Corr
HIC2	0.575775	-0.142857	Group1:High_DNA-RNA_Corr & Low_RNA-Pro_Corr
HINFP	0.672239	0.0857143	Group1:High_DNA-RNA_Corr & Low_RNA-Pro_Corr
HIPK1	0.435121	-0.0281789	Group1:High_DNA-RNA_Corr & Low_RNA-Pro_Corr
HIST2H2BE	0.506323	-0.00233165	Group1:High_DNA-RNA_Corr & Low_RNA-Pro_Corr
HMBOX1	0.60726	0.275366	Group1:High_DNA-RNA_Corr & Low_RNA-Pro_Corr
HMG20A	0.625867	0.199702	Group1:High_DNA-RNA_Corr & Low_RNA-Pro_Corr
HMGN4	0.460514	0.176266	Group1:High_DNA-RNA_Corr & Low_RNA-Pro_Corr
HMGXB3	0.532039	0.091568	Group1:High_DNA-RNA_Corr & Low_RNA-Pro_Corr
HMGXB4	0.529986	0.199477	Group1:High_DNA-RNA_Corr & Low_RNA-Pro_Corr
HNRNPK	0.453112	0.178476	Group1:High_DNA-RNA_Corr & Low_RNA-Pro_Corr
HP1BP3	0.486235	0.193105	Group1:High_DNA-RNA_Corr & Low_RNA-Pro_Corr
HPS1	0.470141	0.132095	Group1:High_DNA-RNA_Corr & Low_RNA-Pro_Corr
HPS6	0.57507	0.197438	Group1:High_DNA-RNA_Corr & Low_RNA-Pro_Corr
HRAS	0.464283	0.269626	Group1:High_DNA-RNA_Corr & Low_RNA-Pro_Corr
HRG	0.480079	-0.0161689	Group1:High_DNA-RNA_Corr & Low_RNA-Pro_Corr
HSBP1	0.468041	0.304089	Group1:High_DNA-RNA_Corr & Low_RNA-Pro_Corr
HSF2	0.540858	0.0869877	Group1:High_DNA-RNA_Corr & Low_RNA-Pro_Corr
HSPB11	0.432866	0.286435	Group1:High_DNA-RNA_Corr & Low_RNA-Pro_Corr
HTD2	0.435177	0.161764	Group1:High_DNA-RNA_Corr & Low_RNA-Pro_Corr
HUS1	0.554221	0.225509	Group1:High_DNA-RNA_Corr & Low_RNA-Pro_Corr
HYPK	0.532806	0.0881258	Group1:High_DNA-RNA_Corr & Low_RNA-Pro_Corr
ICE2	0.589717	0.192661	Group1:High_DNA-RNA_Corr & Low_RNA-Pro_Corr
IDH3B	0.617233	0.0897351	Group1:High_DNA-RNA_Corr & Low_RNA-Pro_Corr
IER3IP1	0.54187	0.18784	Group1:High_DNA-RNA_Corr & Low_RNA-Pro_Corr
IFRD1	0.529679	0.192737	Group1:High_DNA-RNA_Corr & Low_RNA-Pro_Corr
IFT20	0.46428	0.253682	Group1:High_DNA-RNA_Corr & Low_RNA-Pro_Corr
IFT43	0.588031	0.30964	Group1:High_DNA-RNA_Corr & Low_RNA-Pro_Corr
IGHMBP2	0.520494	0.290234	Group1:High_DNA-RNA_Corr & Low_RNA-Pro_Corr
IK	0.622901	0.0590396	Group1:High_DNA-RNA_Corr & Low_RNA-Pro_Corr
IKZF5	0.527076	0.261939	Group1:High_DNA-RNA_Corr & Low_RNA-Pro_Corr
ILDR1	0.456258	0.128453	Group1:High_DNA-RNA_Corr & Low_RNA-Pro_Corr
ILF2	0.498466	0.178046	Group1:High_DNA-RNA_Corr & Low_RNA-Pro_Corr
IMMP2L	0.523218	0.269486	Group1:High_DNA-RNA_Corr & Low_RNA-Pro_Corr
IMMT	0.523663	0.218025	Group1:High_DNA-RNA_Corr & Low_RNA-Pro_Corr
IMP3	0.485148	0.0590651	Group1:High_DNA-RNA_Corr & Low_RNA-Pro_Corr
IMP4	0.467187	0.291023	Group1:High_DNA-RNA_Corr & Low_RNA-Pro_Corr
ING1	0.532592	0.203527	Group1:High_DNA-RNA_Corr & Low_RNA-Pro_Corr
ING3	0.512686	0.295255	Group1:High_DNA-RNA_Corr & Low_RNA-Pro_Corr
INIP	0.623679	0.160322	Group1:High_DNA-RNA_Corr & Low_RNA-Pro_Corr
INO80	0.526842	0.159293	Group1:High_DNA-RNA_Corr & Low_RNA-Pro_Corr
INO80C	0.442848	0.25124	Group1:High_DNA-RNA_Corr & Low_RNA-Pro_Corr
INO80D	0.558933	0.0887265	Group1:High_DNA-RNA_Corr & Low_RNA-Pro_Corr
INO80E	0.457023	0.0338018	Group1:High_DNA-RNA_Corr & Low_RNA-Pro_Corr
INPP5E	0.711596	-0.35	Group1:High_DNA-RNA_Corr & Low_RNA-Pro_Corr
INTS10	0.760344	0.174555	Group1:High_DNA-RNA_Corr & Low_RNA-Pro_Corr
INTS11	0.456294	0.10616	Group1:High_DNA-RNA_Corr & Low_RNA-Pro_Corr
INTS12	0.58643	0.053636	Group1:High_DNA-RNA_Corr & Low_RNA-Pro_Corr
INTS14	0.621666	0.0638731	Group1:High_DNA-RNA_Corr & Low_RNA-Pro_Corr
INTS2	0.634643	0.264718	Group1:High_DNA-RNA_Corr & Low_RNA-Pro_Corr
INTS4	0.572537	0.115093	Group1:High_DNA-RNA_Corr & Low_RNA-Pro_Corr
INTS7	0.510339	0.253218	Group1:High_DNA-RNA_Corr & Low_RNA-Pro_Corr
INTS8	0.694373	0.0783199	Group1:High_DNA-RNA_Corr & Low_RNA-Pro_Corr
INTU	0.548963	0.0372522	Group1:High_DNA-RNA_Corr & Low_RNA-Pro_Corr
IP6K1	0.473875	0.269804	Group1:High_DNA-RNA_Corr & Low_RNA-Pro_Corr
IPP	0.438782	0.0323794	Group1:High_DNA-RNA_Corr & Low_RNA-Pro_Corr
IQCB1	0.525338	0.209765	Group1:High_DNA-RNA_Corr & Low_RNA-Pro_Corr
IQCD	0.458217	-0.319636	Group1:High_DNA-RNA_Corr & Low_RNA-Pro_Corr
IREB2	0.608267	0.310102	Group1:High_DNA-RNA_Corr & Low_RNA-Pro_Corr
IRF2BP2	0.440155	0.257363	Group1:High_DNA-RNA_Corr & Low_RNA-Pro_Corr
ISCA1	0.551091	0.26398	Group1:High_DNA-RNA_Corr & Low_RNA-Pro_Corr
ISY1	0.636896	0.130902	Group1:High_DNA-RNA_Corr & Low_RNA-Pro_Corr
ITFG1	0.546081	0.285019	Group1:High_DNA-RNA_Corr & Low_RNA-Pro_Corr
ITGB3BP	0.533792	0.109274	Group1:High_DNA-RNA_Corr & Low_RNA-Pro_Corr
JAGN1	0.440288	0.306785	Group1:High_DNA-RNA_Corr & Low_RNA-Pro_Corr
JARID2	0.463821	0.135387	Group1:High_DNA-RNA_Corr & Low_RNA-Pro_Corr
JMJD4	0.53695	0.0663818	Group1:High_DNA-RNA_Corr & Low_RNA-Pro_Corr
JMJD8	0.577849	0.233286	Group1:High_DNA-RNA_Corr & Low_RNA-Pro_Corr
JOSD1	0.476915	-0.152794	Group1:High_DNA-RNA_Corr & Low_RNA-Pro_Corr
JTB	0.494359	0.176185	Group1:High_DNA-RNA_Corr & Low_RNA-Pro_Corr
KANSL2	0.54234	0.265142	Group1:High_DNA-RNA_Corr & Low_RNA-Pro_Corr
KAT2A	0.477176	0.170754	Group1:High_DNA-RNA_Corr & Low_RNA-Pro_Corr
KAT5	0.512289	0.0926901	Group1:High_DNA-RNA_Corr & Low_RNA-Pro_Corr
KATNA1	0.591843	0.219975	Group1:High_DNA-RNA_Corr & Low_RNA-Pro_Corr
KBTBD3	0.610094	-0.0197784	Group1:High_DNA-RNA_Corr & Low_RNA-Pro_Corr
KCTD2	0.540566	0.246069	Group1:High_DNA-RNA_Corr & Low_RNA-Pro_Corr
KCTD20	0.478346	0.239268	Group1:High_DNA-RNA_Corr & Low_RNA-Pro_Corr
KCTD4	0.574223	0.0857143	Group1:High_DNA-RNA_Corr & Low_RNA-Pro_Corr
KCTD7	0.459634	0.192735	Group1:High_DNA-RNA_Corr & Low_RNA-Pro_Corr
KDM1B	0.509438	0.294683	Group1:High_DNA-RNA_Corr & Low_RNA-Pro_Corr
KDM2A	0.516017	0.284338	Group1:High_DNA-RNA_Corr & Low_RNA-Pro_Corr
KDM2B	0.452416	0.273088	Group1:High_DNA-RNA_Corr & Low_RNA-Pro_Corr
KDM4C	0.677351	0.191345	Group1:High_DNA-RNA_Corr & Low_RNA-Pro_Corr
KIAA0196	0.569333	0.159728	Group1:High_DNA-RNA_Corr & Low_RNA-Pro_Corr
KIAA0556	0.471774	0.300258	Group1:High_DNA-RNA_Corr & Low_RNA-Pro_Corr
KIAA0586	0.744068	0.0173888	Group1:High_DNA-RNA_Corr & Low_RNA-Pro_Corr
KIAA0753	0.498801	0.297737	Group1:High_DNA-RNA_Corr & Low_RNA-Pro_Corr
KIAA0907	0.467268	0.249579	Group1:High_DNA-RNA_Corr & Low_RNA-Pro_Corr
KIAA1109	0.550395	0.201755	Group1:High_DNA-RNA_Corr & Low_RNA-Pro_Corr
KIAA1328	0.522683	0.295752	Group1:High_DNA-RNA_Corr & Low_RNA-Pro_Corr
KIAA1429	0.618529	0.269198	Group1:High_DNA-RNA_Corr & Low_RNA-Pro_Corr
KIAA1958	0.471027	-0.253968	Group1:High_DNA-RNA_Corr & Low_RNA-Pro_Corr
KIAA2026	0.744063	0.0109244	Group1:High_DNA-RNA_Corr & Low_RNA-Pro_Corr
KIDINS220	0.463794	0.137033	Group1:High_DNA-RNA_Corr & Low_RNA-Pro_Corr
KIF24	0.518842	-0.0692395	Group1:High_DNA-RNA_Corr & Low_RNA-Pro_Corr
KIFAP3	0.436861	0.211249	Group1:High_DNA-RNA_Corr & Low_RNA-Pro_Corr
KIFC2	0.631547	0.000399889	Group1:High_DNA-RNA_Corr & Low_RNA-Pro_Corr
KLHDC2	0.492285	0.289083	Group1:High_DNA-RNA_Corr & Low_RNA-Pro_Corr
KLHDC3	0.654037	0.213221	Group1:High_DNA-RNA_Corr & Low_RNA-Pro_Corr
KLHL11	0.506259	0.22357	Group1:High_DNA-RNA_Corr & Low_RNA-Pro_Corr
KLHL12	0.631043	0.148041	Group1:High_DNA-RNA_Corr & Low_RNA-Pro_Corr
KLHL20	0.515794	0.1977	Group1:High_DNA-RNA_Corr & Low_RNA-Pro_Corr
KLHL25	0.446858	0.171681	Group1:High_DNA-RNA_Corr & Low_RNA-Pro_Corr
KLHL36	0.578238	0.285023	Group1:High_DNA-RNA_Corr & Low_RNA-Pro_Corr
KLHL9	0.675887	0.0975507	Group1:High_DNA-RNA_Corr & Low_RNA-Pro_Corr
KMT2E	0.456853	0.276514	Group1:High_DNA-RNA_Corr & Low_RNA-Pro_Corr
KMT5A	0.610476	-0.0593063	Group1:High_DNA-RNA_Corr & Low_RNA-Pro_Corr
KMT5B	0.526026	0.113332	Group1:High_DNA-RNA_Corr & Low_RNA-Pro_Corr
KMT5C	0.455171	0.124652	Group1:High_DNA-RNA_Corr & Low_RNA-Pro_Corr
KPNA5	0.444737	0.180997	Group1:High_DNA-RNA_Corr & Low_RNA-Pro_Corr
KRAS	0.544531	0.228886	Group1:High_DNA-RNA_Corr & Low_RNA-Pro_Corr
KRIT1	0.716665	0.299235	Group1:High_DNA-RNA_Corr & Low_RNA-Pro_Corr
KRR1	0.484212	0.189398	Group1:High_DNA-RNA_Corr & Low_RNA-Pro_Corr
KRTCAP2	0.444189	0.247694	Group1:High_DNA-RNA_Corr & Low_RNA-Pro_Corr
KXD1	0.599808	0.11898	Group1:High_DNA-RNA_Corr & Low_RNA-Pro_Corr
L3MBTL2	0.560659	0.0313702	Group1:High_DNA-RNA_Corr & Low_RNA-Pro_Corr
LACE1	0.536011	0.16941	Group1:High_DNA-RNA_Corr & Low_RNA-Pro_Corr
LAMTOR1	0.54919	0.30176	Group1:High_DNA-RNA_Corr & Low_RNA-Pro_Corr
LAMTOR3	0.574689	0.191043	Group1:High_DNA-RNA_Corr & Low_RNA-Pro_Corr
LAMTOR4	0.504103	0.135411	Group1:High_DNA-RNA_Corr & Low_RNA-Pro_Corr
LARP7	0.573318	0.134538	Group1:High_DNA-RNA_Corr & Low_RNA-Pro_Corr
LAS1L	0.44398	0.225665	Group1:High_DNA-RNA_Corr & Low_RNA-Pro_Corr
LATS1	0.50594	0.243097	Group1:High_DNA-RNA_Corr & Low_RNA-Pro_Corr
LCMT2	0.462954	0.300172	Group1:High_DNA-RNA_Corr & Low_RNA-Pro_Corr
LCOR	0.507894	0.197538	Group1:High_DNA-RNA_Corr & Low_RNA-Pro_Corr
LEO1	0.584286	0.205339	Group1:High_DNA-RNA_Corr & Low_RNA-Pro_Corr
LEPROT	0.437482	0.262947	Group1:High_DNA-RNA_Corr & Low_RNA-Pro_Corr
LIN37	0.498444	0.0383171	Group1:High_DNA-RNA_Corr & Low_RNA-Pro_Corr
LIN52	0.687921	0.152288	Group1:High_DNA-RNA_Corr & Low_RNA-Pro_Corr
LIN54	0.433355	0.263039	Group1:High_DNA-RNA_Corr & Low_RNA-Pro_Corr
LIN7C	0.488235	0.0817484	Group1:High_DNA-RNA_Corr & Low_RNA-Pro_Corr
LIN9	0.471756	0.253482	Group1:High_DNA-RNA_Corr & Low_RNA-Pro_Corr
LINS1	0.546892	-0.0985759	Group1:High_DNA-RNA_Corr & Low_RNA-Pro_Corr
LIPT1	0.4625	0.113546	Group1:High_DNA-RNA_Corr & Low_RNA-Pro_Corr
LLPH	0.461666	0.151515	Group1:High_DNA-RNA_Corr & Low_RNA-Pro_Corr
LMBR1	0.598657	0.27167	Group1:High_DNA-RNA_Corr & Low_RNA-Pro_Corr
LNX2	0.484586	0.0619143	Group1:High_DNA-RNA_Corr & Low_RNA-Pro_Corr
LONP2	0.645112	0.257448	Group1:High_DNA-RNA_Corr & Low_RNA-Pro_Corr
LRCH3	0.53592	0.243305	Group1:High_DNA-RNA_Corr & Low_RNA-Pro_Corr
LRIG2	0.470039	-0.0583151	Group1:High_DNA-RNA_Corr & Low_RNA-Pro_Corr
LRP6	0.491647	0.286687	Group1:High_DNA-RNA_Corr & Low_RNA-Pro_Corr
LRR1	0.704045	0.169602	Group1:High_DNA-RNA_Corr & Low_RNA-Pro_Corr
LRRC14	0.566906	0.256691	Group1:High_DNA-RNA_Corr & Low_RNA-Pro_Corr
LRRC45	0.489471	0.16035	Group1:High_DNA-RNA_Corr & Low_RNA-Pro_Corr
LRRC58	0.502971	0.103042	Group1:High_DNA-RNA_Corr & Low_RNA-Pro_Corr
LRWD1	0.521742	0.293411	Group1:High_DNA-RNA_Corr & Low_RNA-Pro_Corr
LSM12	0.472486	0.188244	Group1:High_DNA-RNA_Corr & Low_RNA-Pro_Corr
LSM2	0.580815	0.209847	Group1:High_DNA-RNA_Corr & Low_RNA-Pro_Corr
LSM5	0.472875	0.100466	Group1:High_DNA-RNA_Corr & Low_RNA-Pro_Corr
LSM8	0.544124	0.0932899	Group1:High_DNA-RNA_Corr & Low_RNA-Pro_Corr
LTV1	0.533148	0.310796	Group1:High_DNA-RNA_Corr & Low_RNA-Pro_Corr
LUC7L	0.494257	0.174839	Group1:High_DNA-RNA_Corr & Low_RNA-Pro_Corr
LUC7L2	0.619352	0.310243	Group1:High_DNA-RNA_Corr & Low_RNA-Pro_Corr
LUC7L3	0.524987	0.262592	Group1:High_DNA-RNA_Corr & Low_RNA-Pro_Corr
LYRM2	0.598627	0.29148	Group1:High_DNA-RNA_Corr & Low_RNA-Pro_Corr
LYRM4	0.55583	0.224871	Group1:High_DNA-RNA_Corr & Low_RNA-Pro_Corr
LYSMD3	0.537785	0.285114	Group1:High_DNA-RNA_Corr & Low_RNA-Pro_Corr
LZTR1	0.483349	0.161665	Group1:High_DNA-RNA_Corr & Low_RNA-Pro_Corr
LZTS2	0.454673	0.302837	Group1:High_DNA-RNA_Corr & Low_RNA-Pro_Corr
MAD1L1	0.523018	0.11736	Group1:High_DNA-RNA_Corr & Low_RNA-Pro_Corr
MAD2L1BP	0.547218	0.282024	Group1:High_DNA-RNA_Corr & Low_RNA-Pro_Corr
MAEA	0.565417	0.0478199	Group1:High_DNA-RNA_Corr & Low_RNA-Pro_Corr
MALSU1	0.511251	0.246653	Group1:High_DNA-RNA_Corr & Low_RNA-Pro_Corr
MANBAL	0.527977	0.151436	Group1:High_DNA-RNA_Corr & Low_RNA-Pro_Corr
MAP2K7	0.447614	0.300496	Group1:High_DNA-RNA_Corr & Low_RNA-Pro_Corr
MAP3K11	0.465544	0.208213	Group1:High_DNA-RNA_Corr & Low_RNA-Pro_Corr
MAP3K7	0.632767	0.287667	Group1:High_DNA-RNA_Corr & Low_RNA-Pro_Corr
MAP6D1	0.477972	-0.267731	Group1:High_DNA-RNA_Corr & Low_RNA-Pro_Corr
MAPK1IP1L	0.604029	0.302381	Group1:High_DNA-RNA_Corr & Low_RNA-Pro_Corr
MAPK6	0.596816	0.0102304	Group1:High_DNA-RNA_Corr & Low_RNA-Pro_Corr
MAPKAP1	0.53992	0.172128	Group1:High_DNA-RNA_Corr & Low_RNA-Pro_Corr
MAPKAPK5	0.492521	0.0546258	Group1:High_DNA-RNA_Corr & Low_RNA-Pro_Corr
2021-03-05	0.543305	0.0324898	Group1:High_DNA-RNA_Corr & Low_RNA-Pro_Corr
2021-03-06	0.638201	0.056157	Group1:High_DNA-RNA_Corr & Low_RNA-Pro_Corr
2021-03-07	0.561428	0.216637	Group1:High_DNA-RNA_Corr & Low_RNA-Pro_Corr
MASP2	0.439308	0.162468	Group1:High_DNA-RNA_Corr & Low_RNA-Pro_Corr
MAU2	0.497761	0.204854	Group1:High_DNA-RNA_Corr & Low_RNA-Pro_Corr
MBIP	0.497796	0.311005	Group1:High_DNA-RNA_Corr & Low_RNA-Pro_Corr
MBTD1	0.484868	0.288746	Group1:High_DNA-RNA_Corr & Low_RNA-Pro_Corr
MBTPS1	0.557131	0.232931	Group1:High_DNA-RNA_Corr & Low_RNA-Pro_Corr
MCFD2	0.453185	0.309818	Group1:High_DNA-RNA_Corr & Low_RNA-Pro_Corr
MCM8	0.439452	0.187724	Group1:High_DNA-RNA_Corr & Low_RNA-Pro_Corr
MCRS1	0.522218	0.144375	Group1:High_DNA-RNA_Corr & Low_RNA-Pro_Corr
MDM1	0.47258	0.239297	Group1:High_DNA-RNA_Corr & Low_RNA-Pro_Corr
MDM4	0.49614	-0.0282327	Group1:High_DNA-RNA_Corr & Low_RNA-Pro_Corr
MDP1	0.488498	-0.250955	Group1:High_DNA-RNA_Corr & Low_RNA-Pro_Corr
MEA1	0.615909	0.271591	Group1:High_DNA-RNA_Corr & Low_RNA-Pro_Corr
MEAF6	0.525299	0.0720768	Group1:High_DNA-RNA_Corr & Low_RNA-Pro_Corr
MED10	0.500967	0.169927	Group1:High_DNA-RNA_Corr & Low_RNA-Pro_Corr
MED11	0.531316	0.0524822	Group1:High_DNA-RNA_Corr & Low_RNA-Pro_Corr
MED13	0.537094	0.203687	Group1:High_DNA-RNA_Corr & Low_RNA-Pro_Corr
MED17	0.556931	0.188089	Group1:High_DNA-RNA_Corr & Low_RNA-Pro_Corr
MED18	0.502009	0.220748	Group1:High_DNA-RNA_Corr & Low_RNA-Pro_Corr
MED19	0.477685	0.115855	Group1:High_DNA-RNA_Corr & Low_RNA-Pro_Corr
MED20	0.603545	0.213904	Group1:High_DNA-RNA_Corr & Low_RNA-Pro_Corr
MED21	0.517192	0.177085	Group1:High_DNA-RNA_Corr & Low_RNA-Pro_Corr
MED22	0.493974	0.221084	Group1:High_DNA-RNA_Corr & Low_RNA-Pro_Corr
MED23	0.549694	0.200554	Group1:High_DNA-RNA_Corr & Low_RNA-Pro_Corr
MED24	0.430859	0.0816837	Group1:High_DNA-RNA_Corr & Low_RNA-Pro_Corr
MED26	0.484492	0.140757	Group1:High_DNA-RNA_Corr & Low_RNA-Pro_Corr
MED27	0.497876	0.187056	Group1:High_DNA-RNA_Corr & Low_RNA-Pro_Corr
MED28	0.606242	0.28525	Group1:High_DNA-RNA_Corr & Low_RNA-Pro_Corr
MED29	0.485345	0.231777	Group1:High_DNA-RNA_Corr & Low_RNA-Pro_Corr
MED30	0.62196	0.155793	Group1:High_DNA-RNA_Corr & Low_RNA-Pro_Corr
MED31	0.489234	0.0101647	Group1:High_DNA-RNA_Corr & Low_RNA-Pro_Corr
MED4	0.601665	0.120895	Group1:High_DNA-RNA_Corr & Low_RNA-Pro_Corr
MED6	0.629885	0.118486	Group1:High_DNA-RNA_Corr & Low_RNA-Pro_Corr
MED7	0.640619	0.100946	Group1:High_DNA-RNA_Corr & Low_RNA-Pro_Corr
MED8	0.526035	0.0227556	Group1:High_DNA-RNA_Corr & Low_RNA-Pro_Corr
MEF2A	0.496225	0.262548	Group1:High_DNA-RNA_Corr & Low_RNA-Pro_Corr
MEN1	0.4776	0.150391	Group1:High_DNA-RNA_Corr & Low_RNA-Pro_Corr
METTL15	0.588584	0.310599	Group1:High_DNA-RNA_Corr & Low_RNA-Pro_Corr
METTL17	0.607466	0.225021	Group1:High_DNA-RNA_Corr & Low_RNA-Pro_Corr
METTL18	0.460722	0.23461	Group1:High_DNA-RNA_Corr & Low_RNA-Pro_Corr
METTL21A	0.461908	0.0941147	Group1:High_DNA-RNA_Corr & Low_RNA-Pro_Corr
METTL2B	0.585122	0.278751	Group1:High_DNA-RNA_Corr & Low_RNA-Pro_Corr
MEX3C	0.550449	0.119153	Group1:High_DNA-RNA_Corr & Low_RNA-Pro_Corr
MFAP1	0.578851	0.193524	Group1:High_DNA-RNA_Corr & Low_RNA-Pro_Corr
MFF	0.546417	0.209679	Group1:High_DNA-RNA_Corr & Low_RNA-Pro_Corr
MFN1	0.592112	0.301199	Group1:High_DNA-RNA_Corr & Low_RNA-Pro_Corr
MFSD14A	0.644339	-0.527408	Group1:High_DNA-RNA_Corr & Low_RNA-Pro_Corr
MIB1	0.466967	0.189679	Group1:High_DNA-RNA_Corr & Low_RNA-Pro_Corr
MIB2	0.45017	0.174301	Group1:High_DNA-RNA_Corr & Low_RNA-Pro_Corr
MICU2	0.633375	0.127709	Group1:High_DNA-RNA_Corr & Low_RNA-Pro_Corr
MIEF2	0.43573	-0.0965906	Group1:High_DNA-RNA_Corr & Low_RNA-Pro_Corr
MIGA2	0.530199	0.272836	Group1:High_DNA-RNA_Corr & Low_RNA-Pro_Corr
MIPOL1	0.543977	0.168052	Group1:High_DNA-RNA_Corr & Low_RNA-Pro_Corr
MIS12	0.531915	0.224108	Group1:High_DNA-RNA_Corr & Low_RNA-Pro_Corr
MKKS	0.544453	0.271639	Group1:High_DNA-RNA_Corr & Low_RNA-Pro_Corr
MKLN1	0.606548	0.239657	Group1:High_DNA-RNA_Corr & Low_RNA-Pro_Corr
MKS1	0.460952	0.308222	Group1:High_DNA-RNA_Corr & Low_RNA-Pro_Corr
MLH1	0.446825	0.268034	Group1:High_DNA-RNA_Corr & Low_RNA-Pro_Corr
MLH3	0.549802	0.179101	Group1:High_DNA-RNA_Corr & Low_RNA-Pro_Corr
MLLT10	0.62998	0.254982	Group1:High_DNA-RNA_Corr & Low_RNA-Pro_Corr
MLST8	0.502736	0.1285	Group1:High_DNA-RNA_Corr & Low_RNA-Pro_Corr
MLX	0.513718	0.105725	Group1:High_DNA-RNA_Corr & Low_RNA-Pro_Corr
MMADHC	0.49708	0.275004	Group1:High_DNA-RNA_Corr & Low_RNA-Pro_Corr
MNAT1	0.645498	0.083299	Group1:High_DNA-RNA_Corr & Low_RNA-Pro_Corr
MOB1A	0.446112	0.233866	Group1:High_DNA-RNA_Corr & Low_RNA-Pro_Corr
MOB4	0.516464	0.108472	Group1:High_DNA-RNA_Corr & Low_RNA-Pro_Corr
MON1B	0.600287	0.275783	Group1:High_DNA-RNA_Corr & Low_RNA-Pro_Corr
MON2	0.447334	0.285	Group1:High_DNA-RNA_Corr & Low_RNA-Pro_Corr
MORC4	0.46734	0.142871	Group1:High_DNA-RNA_Corr & Low_RNA-Pro_Corr
MORF4L1	0.494403	0.222646	Group1:High_DNA-RNA_Corr & Low_RNA-Pro_Corr
MPHOSPH10	0.49251	0.276748	Group1:High_DNA-RNA_Corr & Low_RNA-Pro_Corr
MPHOSPH6	0.536938	0.108831	Group1:High_DNA-RNA_Corr & Low_RNA-Pro_Corr
MPHOSPH8	0.609068	0.164641	Group1:High_DNA-RNA_Corr & Low_RNA-Pro_Corr
MPHOSPH9	0.447061	0.0291105	Group1:High_DNA-RNA_Corr & Low_RNA-Pro_Corr
MPLKIP	0.463595	0.188157	Group1:High_DNA-RNA_Corr & Low_RNA-Pro_Corr
MRFAP1	0.622196	0.137135	Group1:High_DNA-RNA_Corr & Low_RNA-Pro_Corr
MRM2	0.630186	0.262873	Group1:High_DNA-RNA_Corr & Low_RNA-Pro_Corr
MRPL10	0.573942	0.234751	Group1:High_DNA-RNA_Corr & Low_RNA-Pro_Corr
MRPL11	0.452792	0.227073	Group1:High_DNA-RNA_Corr & Low_RNA-Pro_Corr
MRPL13	0.609465	0.228862	Group1:High_DNA-RNA_Corr & Low_RNA-Pro_Corr
MRPL14	0.514278	0.171803	Group1:High_DNA-RNA_Corr & Low_RNA-Pro_Corr
MRPL16	0.524929	0.159353	Group1:High_DNA-RNA_Corr & Low_RNA-Pro_Corr
MRPL17	0.432477	0.0999392	Group1:High_DNA-RNA_Corr & Low_RNA-Pro_Corr
MRPL18	0.52314	0.136213	Group1:High_DNA-RNA_Corr & Low_RNA-Pro_Corr
MRPL19	0.435734	0.139245	Group1:High_DNA-RNA_Corr & Low_RNA-Pro_Corr
MRPL2	0.566079	0.284499	Group1:High_DNA-RNA_Corr & Low_RNA-Pro_Corr
MRPL20	0.519114	0.00472133	Group1:High_DNA-RNA_Corr & Low_RNA-Pro_Corr
MRPL21	0.493013	0.18102	Group1:High_DNA-RNA_Corr & Low_RNA-Pro_Corr
MRPL22	0.532323	0.122063	Group1:High_DNA-RNA_Corr & Low_RNA-Pro_Corr
MRPL23	0.436303	0.137072	Group1:High_DNA-RNA_Corr & Low_RNA-Pro_Corr
MRPL24	0.522095	0.179787	Group1:High_DNA-RNA_Corr & Low_RNA-Pro_Corr
MRPL27	0.522467	0.159855	Group1:High_DNA-RNA_Corr & Low_RNA-Pro_Corr
MRPL3	0.566046	0.158505	Group1:High_DNA-RNA_Corr & Low_RNA-Pro_Corr
MRPL30	0.503686	0.170594	Group1:High_DNA-RNA_Corr & Low_RNA-Pro_Corr
MRPL32	0.483892	0.187468	Group1:High_DNA-RNA_Corr & Low_RNA-Pro_Corr
MRPL37	0.563239	0.227966	Group1:High_DNA-RNA_Corr & Low_RNA-Pro_Corr
MRPL39	0.569412	0.175709	Group1:High_DNA-RNA_Corr & Low_RNA-Pro_Corr
MRPL4	0.472909	0.230226	Group1:High_DNA-RNA_Corr & Low_RNA-Pro_Corr
MRPL40	0.503107	0.160063	Group1:High_DNA-RNA_Corr & Low_RNA-Pro_Corr
MRPL41	0.441732	0.199354	Group1:High_DNA-RNA_Corr & Low_RNA-Pro_Corr
MRPL42	0.534308	0.0415095	Group1:High_DNA-RNA_Corr & Low_RNA-Pro_Corr
MRPL43	0.60149	0.0456717	Group1:High_DNA-RNA_Corr & Low_RNA-Pro_Corr
MRPL44	0.570705	0.139057	Group1:High_DNA-RNA_Corr & Low_RNA-Pro_Corr
MRPL45	0.538225	0.306989	Group1:High_DNA-RNA_Corr & Low_RNA-Pro_Corr
MRPL46	0.515325	0.214362	Group1:High_DNA-RNA_Corr & Low_RNA-Pro_Corr
MRPL47	0.603603	0.182756	Group1:High_DNA-RNA_Corr & Low_RNA-Pro_Corr
MRPL48	0.470366	0.236958	Group1:High_DNA-RNA_Corr & Low_RNA-Pro_Corr
MRPL49	0.551597	0.220239	Group1:High_DNA-RNA_Corr & Low_RNA-Pro_Corr
MRPL50	0.589157	0.122051	Group1:High_DNA-RNA_Corr & Low_RNA-Pro_Corr
MRPL51	0.593319	0.072094	Group1:High_DNA-RNA_Corr & Low_RNA-Pro_Corr
MRPL52	0.485923	0.128954	Group1:High_DNA-RNA_Corr & Low_RNA-Pro_Corr
MRPL55	0.457759	0.132172	Group1:High_DNA-RNA_Corr & Low_RNA-Pro_Corr
MRPL57	0.514514	0.149215	Group1:High_DNA-RNA_Corr & Low_RNA-Pro_Corr
MRPL58	0.583723	0.237865	Group1:High_DNA-RNA_Corr & Low_RNA-Pro_Corr
MRPL9	0.560675	0.109538	Group1:High_DNA-RNA_Corr & Low_RNA-Pro_Corr
MRPS10	0.489505	0.153527	Group1:High_DNA-RNA_Corr & Low_RNA-Pro_Corr
MRPS11	0.541609	0.124115	Group1:High_DNA-RNA_Corr & Low_RNA-Pro_Corr
MRPS14	0.504468	0.0463712	Group1:High_DNA-RNA_Corr & Low_RNA-Pro_Corr
MRPS15	0.492272	0.201022	Group1:High_DNA-RNA_Corr & Low_RNA-Pro_Corr
MRPS16	0.567603	0.128146	Group1:High_DNA-RNA_Corr & Low_RNA-Pro_Corr
MRPS17	0.500483	0.215563	Group1:High_DNA-RNA_Corr & Low_RNA-Pro_Corr
MRPS18A	0.557848	0.181068	Group1:High_DNA-RNA_Corr & Low_RNA-Pro_Corr
MRPS18B	0.544159	0.192205	Group1:High_DNA-RNA_Corr & Low_RNA-Pro_Corr
MRPS18C	0.438023	0.0640316	Group1:High_DNA-RNA_Corr & Low_RNA-Pro_Corr
MRPS2	0.494148	0.246409	Group1:High_DNA-RNA_Corr & Low_RNA-Pro_Corr
MRPS22	0.617479	0.189614	Group1:High_DNA-RNA_Corr & Low_RNA-Pro_Corr
MRPS23	0.534915	0.239212	Group1:High_DNA-RNA_Corr & Low_RNA-Pro_Corr
MRPS24	0.494133	0.146421	Group1:High_DNA-RNA_Corr & Low_RNA-Pro_Corr
MRPS25	0.444469	0.292148	Group1:High_DNA-RNA_Corr & Low_RNA-Pro_Corr
MRPS27	0.696622	0.277929	Group1:High_DNA-RNA_Corr & Low_RNA-Pro_Corr
MRPS28	0.596419	0.303228	Group1:High_DNA-RNA_Corr & Low_RNA-Pro_Corr
MRPS30	0.498839	0.230209	Group1:High_DNA-RNA_Corr & Low_RNA-Pro_Corr
MRPS31	0.616129	0.159536	Group1:High_DNA-RNA_Corr & Low_RNA-Pro_Corr
MRPS33	0.472626	0.161368	Group1:High_DNA-RNA_Corr & Low_RNA-Pro_Corr
MRPS35	0.534616	0.275594	Group1:High_DNA-RNA_Corr & Low_RNA-Pro_Corr
MRPS6	0.457548	0.191245	Group1:High_DNA-RNA_Corr & Low_RNA-Pro_Corr
MRPS7	0.579392	0.310823	Group1:High_DNA-RNA_Corr & Low_RNA-Pro_Corr
MRPS9	0.497672	0.247953	Group1:High_DNA-RNA_Corr & Low_RNA-Pro_Corr
MRS2	0.531849	0.26936	Group1:High_DNA-RNA_Corr & Low_RNA-Pro_Corr
MSH5	0.58657	-0.0783401	Group1:High_DNA-RNA_Corr & Low_RNA-Pro_Corr
MSL1	0.442542	0.146543	Group1:High_DNA-RNA_Corr & Low_RNA-Pro_Corr
MTA2	0.455455	0.256948	Group1:High_DNA-RNA_Corr & Low_RNA-Pro_Corr
MTCH1	0.603329	0.305505	Group1:High_DNA-RNA_Corr & Low_RNA-Pro_Corr
MTERF1	0.586663	0.0987957	Group1:High_DNA-RNA_Corr & Low_RNA-Pro_Corr
MTERF4	0.552339	0.210547	Group1:High_DNA-RNA_Corr & Low_RNA-Pro_Corr
MTF2	0.590304	0.218599	Group1:High_DNA-RNA_Corr & Low_RNA-Pro_Corr
MTFMT	0.533665	0.280786	Group1:High_DNA-RNA_Corr & Low_RNA-Pro_Corr
MTFR1L	0.55341	0.294015	Group1:High_DNA-RNA_Corr & Low_RNA-Pro_Corr
MTFR2	0.533003	0.224808	Group1:High_DNA-RNA_Corr & Low_RNA-Pro_Corr
MTMR4	0.6056	0.19179	Group1:High_DNA-RNA_Corr & Low_RNA-Pro_Corr
MTRF1	0.595664	0.304489	Group1:High_DNA-RNA_Corr & Low_RNA-Pro_Corr
MTRF1L	0.582276	0.11159	Group1:High_DNA-RNA_Corr & Low_RNA-Pro_Corr
MUL1	0.524034	0.146202	Group1:High_DNA-RNA_Corr & Low_RNA-Pro_Corr
MUS81	0.68471	-0.308824	Group1:High_DNA-RNA_Corr & Low_RNA-Pro_Corr
MYL12A	0.463552	0.1016	Group1:High_DNA-RNA_Corr & Low_RNA-Pro_Corr
MYL12B	0.539204	0.172679	Group1:High_DNA-RNA_Corr & Low_RNA-Pro_Corr
MYO16	0.503453	-0.0523715	Group1:High_DNA-RNA_Corr & Low_RNA-Pro_Corr
N4BP2L2	0.598112	0.302212	Group1:High_DNA-RNA_Corr & Low_RNA-Pro_Corr
NAA20	0.549943	0.0455896	Group1:High_DNA-RNA_Corr & Low_RNA-Pro_Corr
NAA35	0.62805	0.209471	Group1:High_DNA-RNA_Corr & Low_RNA-Pro_Corr
NAA60	0.477338	0.0153846	Group1:High_DNA-RNA_Corr & Low_RNA-Pro_Corr
NABP2	0.43236	0.299588	Group1:High_DNA-RNA_Corr & Low_RNA-Pro_Corr
NACA	0.441903	0.119715	Group1:High_DNA-RNA_Corr & Low_RNA-Pro_Corr
NACC2	0.514742	0.166982	Group1:High_DNA-RNA_Corr & Low_RNA-Pro_Corr
NAE1	0.499186	0.294187	Group1:High_DNA-RNA_Corr & Low_RNA-Pro_Corr
NAF1	0.432034	0.280003	Group1:High_DNA-RNA_Corr & Low_RNA-Pro_Corr
NAPB	0.542036	0.288848	Group1:High_DNA-RNA_Corr & Low_RNA-Pro_Corr
NARFL	0.571186	0.28941	Group1:High_DNA-RNA_Corr & Low_RNA-Pro_Corr
NAT9	0.572247	0.124931	Group1:High_DNA-RNA_Corr & Low_RNA-Pro_Corr
NBAS	0.516932	0.300411	Group1:High_DNA-RNA_Corr & Low_RNA-Pro_Corr
NCBP2	0.702661	0.202969	Group1:High_DNA-RNA_Corr & Low_RNA-Pro_Corr
NCOA6	0.466412	0.178073	Group1:High_DNA-RNA_Corr & Low_RNA-Pro_Corr
NDEL1	0.535945	0.304878	Group1:High_DNA-RNA_Corr & Low_RNA-Pro_Corr
NDFIP1	0.563204	0.212704	Group1:High_DNA-RNA_Corr & Low_RNA-Pro_Corr
NDOR1	0.453354	0.0490317	Group1:High_DNA-RNA_Corr & Low_RNA-Pro_Corr
NDUFA10	0.558499	0.0905694	Group1:High_DNA-RNA_Corr & Low_RNA-Pro_Corr
NDUFA2	0.551662	0.127167	Group1:High_DNA-RNA_Corr & Low_RNA-Pro_Corr
NDUFA6	0.459319	0.129184	Group1:High_DNA-RNA_Corr & Low_RNA-Pro_Corr
NDUFA8	0.528182	0.108941	Group1:High_DNA-RNA_Corr & Low_RNA-Pro_Corr
NDUFA9	0.589686	0.137564	Group1:High_DNA-RNA_Corr & Low_RNA-Pro_Corr
NDUFAF1	0.480839	0.165854	Group1:High_DNA-RNA_Corr & Low_RNA-Pro_Corr
NDUFAF5	0.527982	0.271371	Group1:High_DNA-RNA_Corr & Low_RNA-Pro_Corr
NDUFAF8	0.534787	0.196538	Group1:High_DNA-RNA_Corr & Low_RNA-Pro_Corr
NDUFB1	0.43363	0.122049	Group1:High_DNA-RNA_Corr & Low_RNA-Pro_Corr
NDUFB10	0.5167	0.206327	Group1:High_DNA-RNA_Corr & Low_RNA-Pro_Corr
NDUFB2	0.431779	0.0232279	Group1:High_DNA-RNA_Corr & Low_RNA-Pro_Corr
NDUFB4	0.508124	0.0536102	Group1:High_DNA-RNA_Corr & Low_RNA-Pro_Corr
NDUFB5	0.511834	0.0881825	Group1:High_DNA-RNA_Corr & Low_RNA-Pro_Corr
NDUFB6	0.57185	0.193419	Group1:High_DNA-RNA_Corr & Low_RNA-Pro_Corr
NDUFB7	0.451949	0.0463324	Group1:High_DNA-RNA_Corr & Low_RNA-Pro_Corr
NDUFB8	0.511739	0.0889242	Group1:High_DNA-RNA_Corr & Low_RNA-Pro_Corr
NDUFB9	0.629529	0.0732818	Group1:High_DNA-RNA_Corr & Low_RNA-Pro_Corr
NDUFC2	0.442506	0.116182	Group1:High_DNA-RNA_Corr & Low_RNA-Pro_Corr
NDUFS1	0.543654	0.088847	Group1:High_DNA-RNA_Corr & Low_RNA-Pro_Corr
NDUFS2	0.553817	0.0627003	Group1:High_DNA-RNA_Corr & Low_RNA-Pro_Corr
NDUFS3	0.558084	0.0479236	Group1:High_DNA-RNA_Corr & Low_RNA-Pro_Corr
NDUFS4	0.578165	0.0749494	Group1:High_DNA-RNA_Corr & Low_RNA-Pro_Corr
NDUFS5	0.452394	-0.0452088	Group1:High_DNA-RNA_Corr & Low_RNA-Pro_Corr
NDUFS6	0.479191	-0.0213184	Group1:High_DNA-RNA_Corr & Low_RNA-Pro_Corr
NDUFS8	0.497134	0.0640776	Group1:High_DNA-RNA_Corr & Low_RNA-Pro_Corr
NDUFV1	0.572397	0.0129209	Group1:High_DNA-RNA_Corr & Low_RNA-Pro_Corr
NDUFV2	0.571224	0.0963032	Group1:High_DNA-RNA_Corr & Low_RNA-Pro_Corr
NDUFV3	0.584532	0.155423	Group1:High_DNA-RNA_Corr & Low_RNA-Pro_Corr
NEDD8	0.590266	0.0944496	Group1:High_DNA-RNA_Corr & Low_RNA-Pro_Corr
NEK4	0.48068	0.225918	Group1:High_DNA-RNA_Corr & Low_RNA-Pro_Corr
NELFCD	0.590885	0.205011	Group1:High_DNA-RNA_Corr & Low_RNA-Pro_Corr
NELFE	0.560614	0.278251	Group1:High_DNA-RNA_Corr & Low_RNA-Pro_Corr
NEMP1	0.507099	0.309181	Group1:High_DNA-RNA_Corr & Low_RNA-Pro_Corr
NET1	0.547823	0.278566	Group1:High_DNA-RNA_Corr & Low_RNA-Pro_Corr
NEU3	0.43878	0.147859	Group1:High_DNA-RNA_Corr & Low_RNA-Pro_Corr
NEURL4	0.470957	0.172993	Group1:High_DNA-RNA_Corr & Low_RNA-Pro_Corr
NFKBIL1	0.461995	0.229577	Group1:High_DNA-RNA_Corr & Low_RNA-Pro_Corr
NFRKB	0.470063	0.131643	Group1:High_DNA-RNA_Corr & Low_RNA-Pro_Corr
NFYA	0.441585	0.147305	Group1:High_DNA-RNA_Corr & Low_RNA-Pro_Corr
NFYC	0.549549	0.119527	Group1:High_DNA-RNA_Corr & Low_RNA-Pro_Corr
NGDN	0.678542	0.214135	Group1:High_DNA-RNA_Corr & Low_RNA-Pro_Corr
NGRN	0.581551	0.273701	Group1:High_DNA-RNA_Corr & Low_RNA-Pro_Corr
NHLRC3	0.541145	0.294953	Group1:High_DNA-RNA_Corr & Low_RNA-Pro_Corr
NHP2	0.46555	0.120438	Group1:High_DNA-RNA_Corr & Low_RNA-Pro_Corr
NINL	0.509233	0.212521	Group1:High_DNA-RNA_Corr & Low_RNA-Pro_Corr
NIP7	0.574741	0.253376	Group1:High_DNA-RNA_Corr & Low_RNA-Pro_Corr
NIPA1	0.432326	-0.175537	Group1:High_DNA-RNA_Corr & Low_RNA-Pro_Corr
NIPA2	0.495738	0.0792076	Group1:High_DNA-RNA_Corr & Low_RNA-Pro_Corr
NIPSNAP3A	0.4814	0.283383	Group1:High_DNA-RNA_Corr & Low_RNA-Pro_Corr
NIPSNAP3B	0.434796	0.220365	Group1:High_DNA-RNA_Corr & Low_RNA-Pro_Corr
NKAP	0.459219	0.241615	Group1:High_DNA-RNA_Corr & Low_RNA-Pro_Corr
NKIRAS2	0.490198	0.185185	Group1:High_DNA-RNA_Corr & Low_RNA-Pro_Corr
NLK	0.551526	0.0532845	Group1:High_DNA-RNA_Corr & Low_RNA-Pro_Corr
NOA1	0.50403	0.187313	Group1:High_DNA-RNA_Corr & Low_RNA-Pro_Corr
NOC2L	0.509551	0.255663	Group1:High_DNA-RNA_Corr & Low_RNA-Pro_Corr
NOL12	0.553878	0.26142	Group1:High_DNA-RNA_Corr & Low_RNA-Pro_Corr
NOL7	0.580266	0.306317	Group1:High_DNA-RNA_Corr & Low_RNA-Pro_Corr
NOL9	0.567968	0.251114	Group1:High_DNA-RNA_Corr & Low_RNA-Pro_Corr
NOP10	0.444996	-0.0600045	Group1:High_DNA-RNA_Corr & Low_RNA-Pro_Corr
NPAT	0.535612	0.225046	Group1:High_DNA-RNA_Corr & Low_RNA-Pro_Corr
NPHP3	0.471827	-0.0570884	Group1:High_DNA-RNA_Corr & Low_RNA-Pro_Corr
NPRL2	0.451014	0.114349	Group1:High_DNA-RNA_Corr & Low_RNA-Pro_Corr
NR2C1	0.447421	0.219924	Group1:High_DNA-RNA_Corr & Low_RNA-Pro_Corr
NRBP1	0.453763	0.252563	Group1:High_DNA-RNA_Corr & Low_RNA-Pro_Corr
NSA2	0.518252	0.0654227	Group1:High_DNA-RNA_Corr & Low_RNA-Pro_Corr
NSD1	0.49572	0.229561	Group1:High_DNA-RNA_Corr & Low_RNA-Pro_Corr
NSL1	0.548911	0.303463	Group1:High_DNA-RNA_Corr & Low_RNA-Pro_Corr
NSMCE1	0.499785	0.117286	Group1:High_DNA-RNA_Corr & Low_RNA-Pro_Corr
NSMCE2	0.635069	0.231056	Group1:High_DNA-RNA_Corr & Low_RNA-Pro_Corr
NSMCE3	0.48941	0.272369	Group1:High_DNA-RNA_Corr & Low_RNA-Pro_Corr
NSMCE4A	0.569507	0.249322	Group1:High_DNA-RNA_Corr & Low_RNA-Pro_Corr
NSUN3	0.572325	0.117362	Group1:High_DNA-RNA_Corr & Low_RNA-Pro_Corr
NSUN4	0.506685	0.267109	Group1:High_DNA-RNA_Corr & Low_RNA-Pro_Corr
NUBP2	0.486426	0.278811	Group1:High_DNA-RNA_Corr & Low_RNA-Pro_Corr
NUDT21	0.551449	0.115911	Group1:High_DNA-RNA_Corr & Low_RNA-Pro_Corr
NUDT22	0.472525	0.300167	Group1:High_DNA-RNA_Corr & Low_RNA-Pro_Corr
NUFIP1	0.550538	0.224684	Group1:High_DNA-RNA_Corr & Low_RNA-Pro_Corr
NUP133	0.701727	0.275393	Group1:High_DNA-RNA_Corr & Low_RNA-Pro_Corr
NUP188	0.452987	0.187627	Group1:High_DNA-RNA_Corr & Low_RNA-Pro_Corr
NUP35	0.436222	0.265106	Group1:High_DNA-RNA_Corr & Low_RNA-Pro_Corr
NUP37	0.454324	0.215346	Group1:High_DNA-RNA_Corr & Low_RNA-Pro_Corr
NUP43	0.638902	0.185902	Group1:High_DNA-RNA_Corr & Low_RNA-Pro_Corr
NUP54	0.51818	0.155576	Group1:High_DNA-RNA_Corr & Low_RNA-Pro_Corr
NUP85	0.565057	0.276137	Group1:High_DNA-RNA_Corr & Low_RNA-Pro_Corr
NUP88	0.576167	0.305659	Group1:High_DNA-RNA_Corr & Low_RNA-Pro_Corr
NUP98	0.552174	0.230959	Group1:High_DNA-RNA_Corr & Low_RNA-Pro_Corr
NUPL2	0.591981	0.234025	Group1:High_DNA-RNA_Corr & Low_RNA-Pro_Corr
NUTF2	0.522738	0.215695	Group1:High_DNA-RNA_Corr & Low_RNA-Pro_Corr
NXT1	0.581635	0.208017	Group1:High_DNA-RNA_Corr & Low_RNA-Pro_Corr
ODF2	0.484546	0.225873	Group1:High_DNA-RNA_Corr & Low_RNA-Pro_Corr
ODR4	0.825316	0.288004	Group1:High_DNA-RNA_Corr & Low_RNA-Pro_Corr
OFD1	0.510243	0.253774	Group1:High_DNA-RNA_Corr & Low_RNA-Pro_Corr
OGFOD2	0.434908	0.208562	Group1:High_DNA-RNA_Corr & Low_RNA-Pro_Corr
OGFOD3	0.478992	0.238393	Group1:High_DNA-RNA_Corr & Low_RNA-Pro_Corr
OPA3	0.509217	0.283904	Group1:High_DNA-RNA_Corr & Low_RNA-Pro_Corr
ORAOV1	0.518233	-0.0126187	Group1:High_DNA-RNA_Corr & Low_RNA-Pro_Corr
ORC3	0.580145	0.267681	Group1:High_DNA-RNA_Corr & Low_RNA-Pro_Corr
ORC5	0.615224	0.238789	Group1:High_DNA-RNA_Corr & Low_RNA-Pro_Corr
ORMDL1	0.440521	-0.0143495	Group1:High_DNA-RNA_Corr & Low_RNA-Pro_Corr
OS9	0.432463	0.236128	Group1:High_DNA-RNA_Corr & Low_RNA-Pro_Corr
OTX1	0.641578	-0.5	Group1:High_DNA-RNA_Corr & Low_RNA-Pro_Corr
OXA1L	0.654218	0.258565	Group1:High_DNA-RNA_Corr & Low_RNA-Pro_Corr
OXLD1	0.530015	0.0841121	Group1:High_DNA-RNA_Corr & Low_RNA-Pro_Corr
OXNAD1	0.487829	0.23507	Group1:High_DNA-RNA_Corr & Low_RNA-Pro_Corr
PABPC1	0.596518	0.2801	Group1:High_DNA-RNA_Corr & Low_RNA-Pro_Corr
PABPN1	0.616465	0.280659	Group1:High_DNA-RNA_Corr & Low_RNA-Pro_Corr
PACS2	0.513145	0.292541	Group1:High_DNA-RNA_Corr & Low_RNA-Pro_Corr
PAF1	0.507841	0.132147	Group1:High_DNA-RNA_Corr & Low_RNA-Pro_Corr
PAGR1	0.491852	0.271555	Group1:High_DNA-RNA_Corr & Low_RNA-Pro_Corr
PALB2	0.55102	-0.0187149	Group1:High_DNA-RNA_Corr & Low_RNA-Pro_Corr
PANK2	0.613362	0.270364	Group1:High_DNA-RNA_Corr & Low_RNA-Pro_Corr
PAPD4	0.621851	0.299947	Group1:High_DNA-RNA_Corr & Low_RNA-Pro_Corr
PAPOLG	0.46632	0.280758	Group1:High_DNA-RNA_Corr & Low_RNA-Pro_Corr
PAXBP1	0.474486	0.25121	Group1:High_DNA-RNA_Corr & Low_RNA-Pro_Corr
PBRM1	0.574833	0.295067	Group1:High_DNA-RNA_Corr & Low_RNA-Pro_Corr
PCBP2	0.561906	0.204085	Group1:High_DNA-RNA_Corr & Low_RNA-Pro_Corr
PCGF1	0.445481	0.119593	Group1:High_DNA-RNA_Corr & Low_RNA-Pro_Corr
PCGF3	0.487796	0.10234	Group1:High_DNA-RNA_Corr & Low_RNA-Pro_Corr
PCGF6	0.529404	0.239692	Group1:High_DNA-RNA_Corr & Low_RNA-Pro_Corr
PCSK7	0.759378	0	Group1:High_DNA-RNA_Corr & Low_RNA-Pro_Corr
PDCD10	0.5455	0.223745	Group1:High_DNA-RNA_Corr & Low_RNA-Pro_Corr
PDCD7	0.496784	-0.0315826	Group1:High_DNA-RNA_Corr & Low_RNA-Pro_Corr
PDDC1	0.514549	0.0259235	Group1:High_DNA-RNA_Corr & Low_RNA-Pro_Corr
PDHB	0.45542	0.262285	Group1:High_DNA-RNA_Corr & Low_RNA-Pro_Corr
PDRG1	0.578925	0.237382	Group1:High_DNA-RNA_Corr & Low_RNA-Pro_Corr
PEX10	0.491677	0.0367932	Group1:High_DNA-RNA_Corr & Low_RNA-Pro_Corr
PEX11B	0.471191	0.168182	Group1:High_DNA-RNA_Corr & Low_RNA-Pro_Corr
PEX16	0.520581	0.202302	Group1:High_DNA-RNA_Corr & Low_RNA-Pro_Corr
PEX2	0.619685	0.0906814	Group1:High_DNA-RNA_Corr & Low_RNA-Pro_Corr
PEX26	0.519036	0.0857471	Group1:High_DNA-RNA_Corr & Low_RNA-Pro_Corr
PEX3	0.554035	0.296118	Group1:High_DNA-RNA_Corr & Low_RNA-Pro_Corr
PEX5L	0.494409	0.2	Group1:High_DNA-RNA_Corr & Low_RNA-Pro_Corr
PFDN1	0.578908	0.284244	Group1:High_DNA-RNA_Corr & Low_RNA-Pro_Corr
PFDN6	0.54502	0.233607	Group1:High_DNA-RNA_Corr & Low_RNA-Pro_Corr
PGGT1B	0.510498	0.268304	Group1:High_DNA-RNA_Corr & Low_RNA-Pro_Corr
PGS1	0.449267	0.268358	Group1:High_DNA-RNA_Corr & Low_RNA-Pro_Corr
PHB	0.446103	0.192238	Group1:High_DNA-RNA_Corr & Low_RNA-Pro_Corr
PHF14	0.593877	0.281289	Group1:High_DNA-RNA_Corr & Low_RNA-Pro_Corr
PHF20	0.493981	0.235561	Group1:High_DNA-RNA_Corr & Low_RNA-Pro_Corr
PHF5A	0.475375	0.119742	Group1:High_DNA-RNA_Corr & Low_RNA-Pro_Corr
PHKG1	0.439641	0.286127	Group1:High_DNA-RNA_Corr & Low_RNA-Pro_Corr
PHKG2	0.502317	0.198098	Group1:High_DNA-RNA_Corr & Low_RNA-Pro_Corr
PI4KA	0.46334	0.262594	Group1:High_DNA-RNA_Corr & Low_RNA-Pro_Corr
PIAS1	0.541707	0.17903	Group1:High_DNA-RNA_Corr & Low_RNA-Pro_Corr
PIGBOS1	0.517157	0.261311	Group1:High_DNA-RNA_Corr & Low_RNA-Pro_Corr
PIGG	0.629549	0.269444	Group1:High_DNA-RNA_Corr & Low_RNA-Pro_Corr
PIGH	0.541239	0.132053	Group1:High_DNA-RNA_Corr & Low_RNA-Pro_Corr
PIGM	0.642333	0.234671	Group1:High_DNA-RNA_Corr & Low_RNA-Pro_Corr
PIGO	0.558331	0.254595	Group1:High_DNA-RNA_Corr & Low_RNA-Pro_Corr
PIGX	0.470489	0.17919	Group1:High_DNA-RNA_Corr & Low_RNA-Pro_Corr
PIK3C3	0.6708	0.286942	Group1:High_DNA-RNA_Corr & Low_RNA-Pro_Corr
PINK1	0.597171	0.126518	Group1:High_DNA-RNA_Corr & Low_RNA-Pro_Corr
PIP4P1	0.435014	0.250555	Group1:High_DNA-RNA_Corr & Low_RNA-Pro_Corr
PJA2	0.601962	0.298802	Group1:High_DNA-RNA_Corr & Low_RNA-Pro_Corr
PLEKHA8	0.521931	0.29482	Group1:High_DNA-RNA_Corr & Low_RNA-Pro_Corr
PLEKHG6	0.490901	0.280681	Group1:High_DNA-RNA_Corr & Low_RNA-Pro_Corr
PLEKHM3	0.456165	0.106467	Group1:High_DNA-RNA_Corr & Low_RNA-Pro_Corr
PLPP6	0.491767	0.239388	Group1:High_DNA-RNA_Corr & Low_RNA-Pro_Corr
PLRG1	0.552399	0.200146	Group1:High_DNA-RNA_Corr & Low_RNA-Pro_Corr
PMF1	0.480791	0.2198	Group1:High_DNA-RNA_Corr & Low_RNA-Pro_Corr
PMPCB	0.615844	0.107493	Group1:High_DNA-RNA_Corr & Low_RNA-Pro_Corr
PMS1	0.434921	0.309197	Group1:High_DNA-RNA_Corr & Low_RNA-Pro_Corr
PNN	0.587265	0.277589	Group1:High_DNA-RNA_Corr & Low_RNA-Pro_Corr
POC1B	0.447984	0.207417	Group1:High_DNA-RNA_Corr & Low_RNA-Pro_Corr
POC5	0.630037	0.22303	Group1:High_DNA-RNA_Corr & Low_RNA-Pro_Corr
POLE2	0.504886	0.29555	Group1:High_DNA-RNA_Corr & Low_RNA-Pro_Corr
POLG	0.497903	0.0836205	Group1:High_DNA-RNA_Corr & Low_RNA-Pro_Corr
POLG2	0.52029	0.22521	Group1:High_DNA-RNA_Corr & Low_RNA-Pro_Corr
POLH	0.49734	0.142339	Group1:High_DNA-RNA_Corr & Low_RNA-Pro_Corr
POLL	0.554961	0.0346767	Group1:High_DNA-RNA_Corr & Low_RNA-Pro_Corr
POLR2B	0.552837	0.133833	Group1:High_DNA-RNA_Corr & Low_RNA-Pro_Corr
POLR2C	0.530501	0.120231	Group1:High_DNA-RNA_Corr & Low_RNA-Pro_Corr
POLR2D	0.621682	0.19065	Group1:High_DNA-RNA_Corr & Low_RNA-Pro_Corr
POLR2J	0.604994	0.0401446	Group1:High_DNA-RNA_Corr & Low_RNA-Pro_Corr
POLR2K	0.601833	0.12278	Group1:High_DNA-RNA_Corr & Low_RNA-Pro_Corr
POLR2L	0.457356	-0.0332107	Group1:High_DNA-RNA_Corr & Low_RNA-Pro_Corr
POLR3A	0.618278	0.16506	Group1:High_DNA-RNA_Corr & Low_RNA-Pro_Corr
POLR3B	0.556475	0.173823	Group1:High_DNA-RNA_Corr & Low_RNA-Pro_Corr
POLR3C	0.646254	0.2635	Group1:High_DNA-RNA_Corr & Low_RNA-Pro_Corr
POLR3D	0.703394	0.191252	Group1:High_DNA-RNA_Corr & Low_RNA-Pro_Corr
POLR3F	0.640497	0.14152	Group1:High_DNA-RNA_Corr & Low_RNA-Pro_Corr
POM121	0.533321	0.149735	Group1:High_DNA-RNA_Corr & Low_RNA-Pro_Corr
POM121C	0.498207	0.121111	Group1:High_DNA-RNA_Corr & Low_RNA-Pro_Corr
POMP	0.455013	0.145558	Group1:High_DNA-RNA_Corr & Low_RNA-Pro_Corr
POMT1	0.497816	0.303634	Group1:High_DNA-RNA_Corr & Low_RNA-Pro_Corr
POP4	0.502445	0.0764012	Group1:High_DNA-RNA_Corr & Low_RNA-Pro_Corr
POT1	0.558514	0.0916455	Group1:High_DNA-RNA_Corr & Low_RNA-Pro_Corr
PPHLN1	0.517038	0.222543	Group1:High_DNA-RNA_Corr & Low_RNA-Pro_Corr
PPIG	0.482837	0.235605	Group1:High_DNA-RNA_Corr & Low_RNA-Pro_Corr
PPP1CA	0.542895	0.29644	Group1:High_DNA-RNA_Corr & Low_RNA-Pro_Corr
PPP1R16A	0.494304	0.182304	Group1:High_DNA-RNA_Corr & Low_RNA-Pro_Corr
PPP1R35	0.528312	0.241079	Group1:High_DNA-RNA_Corr & Low_RNA-Pro_Corr
PPP1R8	0.595916	0.284693	Group1:High_DNA-RNA_Corr & Low_RNA-Pro_Corr
PPP2CA	0.476697	0.289894	Group1:High_DNA-RNA_Corr & Low_RNA-Pro_Corr
PPP2R2D	0.544676	0.225484	Group1:High_DNA-RNA_Corr & Low_RNA-Pro_Corr
PPP2R5C	0.614089	0.272478	Group1:High_DNA-RNA_Corr & Low_RNA-Pro_Corr
PPP3R1	0.494774	0.060659	Group1:High_DNA-RNA_Corr & Low_RNA-Pro_Corr
PPP4R2	0.460322	0.235044	Group1:High_DNA-RNA_Corr & Low_RNA-Pro_Corr
PPP4R3B	0.576493	0.211701	Group1:High_DNA-RNA_Corr & Low_RNA-Pro_Corr
PPP6C	0.656576	0.129252	Group1:High_DNA-RNA_Corr & Low_RNA-Pro_Corr
PRDM4	0.495117	0.0043956	Group1:High_DNA-RNA_Corr & Low_RNA-Pro_Corr
PRELID1	0.46284	0.156732	Group1:High_DNA-RNA_Corr & Low_RNA-Pro_Corr
PRELID3B	0.505968	0.0084555	Group1:High_DNA-RNA_Corr & Low_RNA-Pro_Corr
PRIMPOL	0.620508	0.235277	Group1:High_DNA-RNA_Corr & Low_RNA-Pro_Corr
PRKAG2	0.459327	0.211985	Group1:High_DNA-RNA_Corr & Low_RNA-Pro_Corr
PRKRIP1	0.604614	0.259101	Group1:High_DNA-RNA_Corr & Low_RNA-Pro_Corr
PRMT7	0.554975	0.17391	Group1:High_DNA-RNA_Corr & Low_RNA-Pro_Corr
PRPF18	0.552719	0.280259	Group1:High_DNA-RNA_Corr & Low_RNA-Pro_Corr
PRPF31	0.6028	0.234285	Group1:High_DNA-RNA_Corr & Low_RNA-Pro_Corr
PRPF38A	0.545587	0.0976536	Group1:High_DNA-RNA_Corr & Low_RNA-Pro_Corr
PRPF39	0.602	0.19496	Group1:High_DNA-RNA_Corr & Low_RNA-Pro_Corr
PRPF4	0.594778	0.293535	Group1:High_DNA-RNA_Corr & Low_RNA-Pro_Corr
PRPF40A	0.549793	0.243545	Group1:High_DNA-RNA_Corr & Low_RNA-Pro_Corr
PRR14	0.440492	0.277483	Group1:High_DNA-RNA_Corr & Low_RNA-Pro_Corr
PRR14L	0.564998	0.220802	Group1:High_DNA-RNA_Corr & Low_RNA-Pro_Corr
PRRC2C	0.489317	0.289086	Group1:High_DNA-RNA_Corr & Low_RNA-Pro_Corr
PSEN1	0.668514	0.22868	Group1:High_DNA-RNA_Corr & Low_RNA-Pro_Corr
PSMA1	0.471223	0.219646	Group1:High_DNA-RNA_Corr & Low_RNA-Pro_Corr
PSMA3	0.460802	0.297144	Group1:High_DNA-RNA_Corr & Low_RNA-Pro_Corr
PSMA4	0.496191	0.194355	Group1:High_DNA-RNA_Corr & Low_RNA-Pro_Corr
PSMA5	0.49313	0.252252	Group1:High_DNA-RNA_Corr & Low_RNA-Pro_Corr
PSMA6	0.46998	0.271339	Group1:High_DNA-RNA_Corr & Low_RNA-Pro_Corr
PSMA7	0.518796	0.155193	Group1:High_DNA-RNA_Corr & Low_RNA-Pro_Corr
PSMB1	0.564927	0.176219	Group1:High_DNA-RNA_Corr & Low_RNA-Pro_Corr
PSMB2	0.454927	0.141768	Group1:High_DNA-RNA_Corr & Low_RNA-Pro_Corr
PSMB3	0.430453	0.0342164	Group1:High_DNA-RNA_Corr & Low_RNA-Pro_Corr
PSMB4	0.495145	0.0677495	Group1:High_DNA-RNA_Corr & Low_RNA-Pro_Corr
PSMB5	0.543033	0.193026	Group1:High_DNA-RNA_Corr & Low_RNA-Pro_Corr
PSMB6	0.498787	0.0818139	Group1:High_DNA-RNA_Corr & Low_RNA-Pro_Corr
PSMB7	0.475038	0.112298	Group1:High_DNA-RNA_Corr & Low_RNA-Pro_Corr
PSMC1	0.54592	0.201121	Group1:High_DNA-RNA_Corr & Low_RNA-Pro_Corr
PSMC2	0.517004	0.120302	Group1:High_DNA-RNA_Corr & Low_RNA-Pro_Corr
PSMC3	0.437013	0.158203	Group1:High_DNA-RNA_Corr & Low_RNA-Pro_Corr
PSMC4	0.515476	0.21895	Group1:High_DNA-RNA_Corr & Low_RNA-Pro_Corr
PSMC5	0.528442	0.0807011	Group1:High_DNA-RNA_Corr & Low_RNA-Pro_Corr
PSMC6	0.579335	0.263258	Group1:High_DNA-RNA_Corr & Low_RNA-Pro_Corr
PSMD1	0.49249	0.278902	Group1:High_DNA-RNA_Corr & Low_RNA-Pro_Corr
PSMD11	0.475962	0.306837	Group1:High_DNA-RNA_Corr & Low_RNA-Pro_Corr
PSMD12	0.511895	0.17663	Group1:High_DNA-RNA_Corr & Low_RNA-Pro_Corr
PSMD13	0.444367	0.191844	Group1:High_DNA-RNA_Corr & Low_RNA-Pro_Corr
PSMD14	0.479923	0.20653	Group1:High_DNA-RNA_Corr & Low_RNA-Pro_Corr
PSMD3	0.563105	0.258827	Group1:High_DNA-RNA_Corr & Low_RNA-Pro_Corr
PSMD4	0.51073	0.13237	Group1:High_DNA-RNA_Corr & Low_RNA-Pro_Corr
PSMD7	0.561147	0.210107	Group1:High_DNA-RNA_Corr & Low_RNA-Pro_Corr
PSMD8	0.457377	0.200896	Group1:High_DNA-RNA_Corr & Low_RNA-Pro_Corr
PSMG2	0.621552	0.165958	Group1:High_DNA-RNA_Corr & Low_RNA-Pro_Corr
PSMG3	0.565417	0.262032	Group1:High_DNA-RNA_Corr & Low_RNA-Pro_Corr
PSMG4	0.472083	0.276806	Group1:High_DNA-RNA_Corr & Low_RNA-Pro_Corr
PTCD2	0.618912	0.26728	Group1:High_DNA-RNA_Corr & Low_RNA-Pro_Corr
PTCD3	0.499702	0.205038	Group1:High_DNA-RNA_Corr & Low_RNA-Pro_Corr
PUM1	0.511701	0.277222	Group1:High_DNA-RNA_Corr & Low_RNA-Pro_Corr
PUM2	0.529047	0.286855	Group1:High_DNA-RNA_Corr & Low_RNA-Pro_Corr
PUS3	0.514428	0.278786	Group1:High_DNA-RNA_Corr & Low_RNA-Pro_Corr
PUS7L	0.445805	0.294289	Group1:High_DNA-RNA_Corr & Low_RNA-Pro_Corr
PYGO2	0.520714	0.075787	Group1:High_DNA-RNA_Corr & Low_RNA-Pro_Corr
PYURF	0.502478	0.118996	Group1:High_DNA-RNA_Corr & Low_RNA-Pro_Corr
R3HCC1L	0.615113	0.267319	Group1:High_DNA-RNA_Corr & Low_RNA-Pro_Corr
R3HDM1	0.450867	0.27521	Group1:High_DNA-RNA_Corr & Low_RNA-Pro_Corr
R3HDM2	0.511979	0.253427	Group1:High_DNA-RNA_Corr & Low_RNA-Pro_Corr
RAB11A	0.51687	0.186336	Group1:High_DNA-RNA_Corr & Low_RNA-Pro_Corr
RAB2B	0.619867	0.296191	Group1:High_DNA-RNA_Corr & Low_RNA-Pro_Corr
RAB33B	0.553969	0.13455	Group1:High_DNA-RNA_Corr & Low_RNA-Pro_Corr
RABGEF1	0.572025	0.286611	Group1:High_DNA-RNA_Corr & Low_RNA-Pro_Corr
RABL3	0.473439	0.20594	Group1:High_DNA-RNA_Corr & Low_RNA-Pro_Corr
RAC1	0.63833	0.0797225	Group1:High_DNA-RNA_Corr & Low_RNA-Pro_Corr
RACK1	0.548182	0.0960659	Group1:High_DNA-RNA_Corr & Low_RNA-Pro_Corr
RAD23A	0.48578	0.249097	Group1:High_DNA-RNA_Corr & Low_RNA-Pro_Corr
RAD51B	0.495036	-0.0777635	Group1:High_DNA-RNA_Corr & Low_RNA-Pro_Corr
RAD51C	0.54981	0.102604	Group1:High_DNA-RNA_Corr & Low_RNA-Pro_Corr
RAD51D	0.468048	0.257143	Group1:High_DNA-RNA_Corr & Low_RNA-Pro_Corr
RALBP1	0.610923	0.211214	Group1:High_DNA-RNA_Corr & Low_RNA-Pro_Corr
RALGAPB	0.644364	0.27265	Group1:High_DNA-RNA_Corr & Low_RNA-Pro_Corr
RALGDS	0.547936	0.067177	Group1:High_DNA-RNA_Corr & Low_RNA-Pro_Corr
RANBP2	0.438529	0.236895	Group1:High_DNA-RNA_Corr & Low_RNA-Pro_Corr
RANBP6	0.597038	0.303163	Group1:High_DNA-RNA_Corr & Low_RNA-Pro_Corr
RAP2A	0.43039	0.204809	Group1:High_DNA-RNA_Corr & Low_RNA-Pro_Corr
RASSF7	0.471197	0.248805	Group1:High_DNA-RNA_Corr & Low_RNA-Pro_Corr
RBAK	0.642181	0.104139	Group1:High_DNA-RNA_Corr & Low_RNA-Pro_Corr
RBBP4	0.525466	0.274621	Group1:High_DNA-RNA_Corr & Low_RNA-Pro_Corr
RBBP6	0.445179	0.264732	Group1:High_DNA-RNA_Corr & Low_RNA-Pro_Corr
RBFA	0.555006	0.209594	Group1:High_DNA-RNA_Corr & Low_RNA-Pro_Corr
RBM23	0.680455	0.261564	Group1:High_DNA-RNA_Corr & Low_RNA-Pro_Corr
RBM25	0.580378	0.164806	Group1:High_DNA-RNA_Corr & Low_RNA-Pro_Corr
RBM34	0.55911	0.275025	Group1:High_DNA-RNA_Corr & Low_RNA-Pro_Corr
RBM39	0.564307	0.298059	Group1:High_DNA-RNA_Corr & Low_RNA-Pro_Corr
RBM42	0.503013	0.152718	Group1:High_DNA-RNA_Corr & Low_RNA-Pro_Corr
RBM48	0.616613	0.218213	Group1:High_DNA-RNA_Corr & Low_RNA-Pro_Corr
RBM7	0.49012	0.292487	Group1:High_DNA-RNA_Corr & Low_RNA-Pro_Corr
RBM8A	0.592638	0.283756	Group1:High_DNA-RNA_Corr & Low_RNA-Pro_Corr
RBMX2	0.46605	0.270358	Group1:High_DNA-RNA_Corr & Low_RNA-Pro_Corr
RC3H1	0.44266	0.0134484	Group1:High_DNA-RNA_Corr & Low_RNA-Pro_Corr
RC3H2	0.555133	0.286178	Group1:High_DNA-RNA_Corr & Low_RNA-Pro_Corr
RCBTB1	0.461646	0.284791	Group1:High_DNA-RNA_Corr & Low_RNA-Pro_Corr
RCE1	0.623941	0.143652	Group1:High_DNA-RNA_Corr & Low_RNA-Pro_Corr
RCHY1	0.473746	0.257318	Group1:High_DNA-RNA_Corr & Low_RNA-Pro_Corr
RCL1	0.630531	0.19288	Group1:High_DNA-RNA_Corr & Low_RNA-Pro_Corr
RELT	0.672705	0.047365	Group1:High_DNA-RNA_Corr & Low_RNA-Pro_Corr
RFT1	0.435943	0.271485	Group1:High_DNA-RNA_Corr & Low_RNA-Pro_Corr
RFWD2	0.503143	0.0662759	Group1:High_DNA-RNA_Corr & Low_RNA-Pro_Corr
RFWD3	0.617454	0.1	Group1:High_DNA-RNA_Corr & Low_RNA-Pro_Corr
RFXANK	0.470237	0.125834	Group1:High_DNA-RNA_Corr & Low_RNA-Pro_Corr
RFXAP	0.46014	0.226954	Group1:High_DNA-RNA_Corr & Low_RNA-Pro_Corr
RGP1	0.644486	0.277042	Group1:High_DNA-RNA_Corr & Low_RNA-Pro_Corr
RHBDD1	0.499809	0.0924388	Group1:High_DNA-RNA_Corr & Low_RNA-Pro_Corr
RHOA	0.528074	0.0883448	Group1:High_DNA-RNA_Corr & Low_RNA-Pro_Corr
RIC8B	0.510479	0.274525	Group1:High_DNA-RNA_Corr & Low_RNA-Pro_Corr
RING1	0.481866	0.285312	Group1:High_DNA-RNA_Corr & Low_RNA-Pro_Corr
RINT1	0.595061	0.156407	Group1:High_DNA-RNA_Corr & Low_RNA-Pro_Corr
RIOK2	0.627836	0.234828	Group1:High_DNA-RNA_Corr & Low_RNA-Pro_Corr
RIT1	0.441169	0.210871	Group1:High_DNA-RNA_Corr & Low_RNA-Pro_Corr
RITA1	0.666742	-0.238095	Group1:High_DNA-RNA_Corr & Low_RNA-Pro_Corr
RMND5A	0.436126	0.163508	Group1:High_DNA-RNA_Corr & Low_RNA-Pro_Corr
RMND5B	0.624136	0.270417	Group1:High_DNA-RNA_Corr & Low_RNA-Pro_Corr
RNASEH1	0.618655	0.248822	Group1:High_DNA-RNA_Corr & Low_RNA-Pro_Corr
RNASEK	0.440052	0.0719749	Group1:High_DNA-RNA_Corr & Low_RNA-Pro_Corr
RNF10	0.612781	0.131666	Group1:High_DNA-RNA_Corr & Low_RNA-Pro_Corr
RNF123	0.453644	0.171782	Group1:High_DNA-RNA_Corr & Low_RNA-Pro_Corr
RNF13	0.439016	0.212412	Group1:High_DNA-RNA_Corr & Low_RNA-Pro_Corr
RNF139	0.554996	0.204466	Group1:High_DNA-RNA_Corr & Low_RNA-Pro_Corr
RNF146	0.433319	0.236848	Group1:High_DNA-RNA_Corr & Low_RNA-Pro_Corr
RNF152	0.503946	0.3	Group1:High_DNA-RNA_Corr & Low_RNA-Pro_Corr
RNF167	0.620781	0.307599	Group1:High_DNA-RNA_Corr & Low_RNA-Pro_Corr
RNF169	0.563979	0.303876	Group1:High_DNA-RNA_Corr & Low_RNA-Pro_Corr
RNF185	0.518365	0.216787	Group1:High_DNA-RNA_Corr & Low_RNA-Pro_Corr
RNF187	0.589996	0.241081	Group1:High_DNA-RNA_Corr & Low_RNA-Pro_Corr
RNF19B	0.491974	0.00770529	Group1:High_DNA-RNA_Corr & Low_RNA-Pro_Corr
RNF20	0.528267	0.103503	Group1:High_DNA-RNA_Corr & Low_RNA-Pro_Corr
RNF216	0.598238	0.260087	Group1:High_DNA-RNA_Corr & Low_RNA-Pro_Corr
RNF220	0.478	0.301449	Group1:High_DNA-RNA_Corr & Low_RNA-Pro_Corr
RNF34	0.648374	0.235771	Group1:High_DNA-RNA_Corr & Low_RNA-Pro_Corr
RNF4	0.656552	0.188551	Group1:High_DNA-RNA_Corr & Low_RNA-Pro_Corr
RNF40	0.548899	0.0630055	Group1:High_DNA-RNA_Corr & Low_RNA-Pro_Corr
RNF41	0.513207	0.281571	Group1:High_DNA-RNA_Corr & Low_RNA-Pro_Corr
RNF7	0.50145	-0.0425551	Group1:High_DNA-RNA_Corr & Low_RNA-Pro_Corr
RNPS1	0.464581	0.160313	Group1:High_DNA-RNA_Corr & Low_RNA-Pro_Corr
ROGDI	0.45756	0.0878882	Group1:High_DNA-RNA_Corr & Low_RNA-Pro_Corr
ROMO1	0.469789	0.281283	Group1:High_DNA-RNA_Corr & Low_RNA-Pro_Corr
RPA3	0.472988	0.0970535	Group1:High_DNA-RNA_Corr & Low_RNA-Pro_Corr
RPAP2	0.535485	0.271956	Group1:High_DNA-RNA_Corr & Low_RNA-Pro_Corr
RPF1	0.588554	0.135982	Group1:High_DNA-RNA_Corr & Low_RNA-Pro_Corr
RPF2	0.468243	0.261373	Group1:High_DNA-RNA_Corr & Low_RNA-Pro_Corr
RPGRIP1L	0.488404	0.120441	Group1:High_DNA-RNA_Corr & Low_RNA-Pro_Corr
RPL11	0.464434	0.0436098	Group1:High_DNA-RNA_Corr & Low_RNA-Pro_Corr
RPL17	0.509952	0.12959	Group1:High_DNA-RNA_Corr & Low_RNA-Pro_Corr
RPL19	0.460471	0.147466	Group1:High_DNA-RNA_Corr & Low_RNA-Pro_Corr
RPL22	0.463645	0.0790146	Group1:High_DNA-RNA_Corr & Low_RNA-Pro_Corr
RPL23A	0.470334	0.13869	Group1:High_DNA-RNA_Corr & Low_RNA-Pro_Corr
RPL24	0.464784	0.0900362	Group1:High_DNA-RNA_Corr & Low_RNA-Pro_Corr
RPL26	0.45971	0.169438	Group1:High_DNA-RNA_Corr & Low_RNA-Pro_Corr
RPL26L1	0.44786	0.295047	Group1:High_DNA-RNA_Corr & Low_RNA-Pro_Corr
RPL30	0.532399	0.0865531	Group1:High_DNA-RNA_Corr & Low_RNA-Pro_Corr
RPL35A	0.489939	0.14814	Group1:High_DNA-RNA_Corr & Low_RNA-Pro_Corr
RPL36AL	0.557836	0.132484	Group1:High_DNA-RNA_Corr & Low_RNA-Pro_Corr
RPL37	0.444735	0.0834017	Group1:High_DNA-RNA_Corr & Low_RNA-Pro_Corr
RPL37A	0.440942	0.0655362	Group1:High_DNA-RNA_Corr & Low_RNA-Pro_Corr
RPL38	0.476277	0.0676046	Group1:High_DNA-RNA_Corr & Low_RNA-Pro_Corr
RPL4	0.445417	0.225673	Group1:High_DNA-RNA_Corr & Low_RNA-Pro_Corr
RPL7	0.530833	0.157739	Group1:High_DNA-RNA_Corr & Low_RNA-Pro_Corr
RPL7A	0.53671	0.0931101	Group1:High_DNA-RNA_Corr & Low_RNA-Pro_Corr
RPL8	0.510684	0.149384	Group1:High_DNA-RNA_Corr & Low_RNA-Pro_Corr
RPLP0	0.446772	0.178124	Group1:High_DNA-RNA_Corr & Low_RNA-Pro_Corr
RPLP1	0.44339	0.135259	Group1:High_DNA-RNA_Corr & Low_RNA-Pro_Corr
RPN1	0.594237	0.311035	Group1:High_DNA-RNA_Corr & Low_RNA-Pro_Corr
RPN2	0.532907	0.259963	Group1:High_DNA-RNA_Corr & Low_RNA-Pro_Corr
RPP14	0.501614	0.0568602	Group1:High_DNA-RNA_Corr & Low_RNA-Pro_Corr
RPP21	0.497187	0.174124	Group1:High_DNA-RNA_Corr & Low_RNA-Pro_Corr
RPP25L	0.548005	0.214251	Group1:High_DNA-RNA_Corr & Low_RNA-Pro_Corr
RPP30	0.507193	0.172424	Group1:High_DNA-RNA_Corr & Low_RNA-Pro_Corr
RPP38	0.640913	0.229416	Group1:High_DNA-RNA_Corr & Low_RNA-Pro_Corr
RPS13	0.45218	0.145502	Group1:High_DNA-RNA_Corr & Low_RNA-Pro_Corr
RPS14	0.506649	0.0832011	Group1:High_DNA-RNA_Corr & Low_RNA-Pro_Corr
RPS17	0.460011	0.11142	Group1:High_DNA-RNA_Corr & Low_RNA-Pro_Corr
RPS20	0.489674	0.132048	Group1:High_DNA-RNA_Corr & Low_RNA-Pro_Corr
RPS21	0.447065	0.108288	Group1:High_DNA-RNA_Corr & Low_RNA-Pro_Corr
RPS24	0.550543	0.0825287	Group1:High_DNA-RNA_Corr & Low_RNA-Pro_Corr
RPS25	0.447656	0.0216946	Group1:High_DNA-RNA_Corr & Low_RNA-Pro_Corr
RPS27A	0.456241	0.0183249	Group1:High_DNA-RNA_Corr & Low_RNA-Pro_Corr
RPS6	0.460952	0.120284	Group1:High_DNA-RNA_Corr & Low_RNA-Pro_Corr
RPS6KC1	0.66205	0.297845	Group1:High_DNA-RNA_Corr & Low_RNA-Pro_Corr
RPS7	0.433469	0.187481	Group1:High_DNA-RNA_Corr & Low_RNA-Pro_Corr
RPTOR	0.435424	0.285428	Group1:High_DNA-RNA_Corr & Low_RNA-Pro_Corr
RPUSD4	0.651497	0.158664	Group1:High_DNA-RNA_Corr & Low_RNA-Pro_Corr
RRAGA	0.512265	0.0657253	Group1:High_DNA-RNA_Corr & Low_RNA-Pro_Corr
RRP36	0.512834	0.279105	Group1:High_DNA-RNA_Corr & Low_RNA-Pro_Corr
RRP7A	0.440284	0.263177	Group1:High_DNA-RNA_Corr & Low_RNA-Pro_Corr
RSAD1	0.557607	0.115876	Group1:High_DNA-RNA_Corr & Low_RNA-Pro_Corr
RSL24D1	0.534843	0.103627	Group1:High_DNA-RNA_Corr & Low_RNA-Pro_Corr
RSRC1	0.632923	0.304307	Group1:High_DNA-RNA_Corr & Low_RNA-Pro_Corr
RSRP1	0.548546	0.0121581	Group1:High_DNA-RNA_Corr & Low_RNA-Pro_Corr
RTCB	0.474243	0.170701	Group1:High_DNA-RNA_Corr & Low_RNA-Pro_Corr
RTEL1	0.431219	0.170566	Group1:High_DNA-RNA_Corr & Low_RNA-Pro_Corr
RTRAF	0.49093	0.0338813	Group1:High_DNA-RNA_Corr & Low_RNA-Pro_Corr
RTTN	0.534929	0.20529	Group1:High_DNA-RNA_Corr & Low_RNA-Pro_Corr
RUBCN	0.495666	0.220925	Group1:High_DNA-RNA_Corr & Low_RNA-Pro_Corr
RWDD1	0.476562	0.282892	Group1:High_DNA-RNA_Corr & Low_RNA-Pro_Corr
RWDD2A	0.472436	0.274785	Group1:High_DNA-RNA_Corr & Low_RNA-Pro_Corr
RWDD3	0.537765	0.246437	Group1:High_DNA-RNA_Corr & Low_RNA-Pro_Corr
S100PBP	0.555809	0.206734	Group1:High_DNA-RNA_Corr & Low_RNA-Pro_Corr
SACM1L	0.441354	0.288871	Group1:High_DNA-RNA_Corr & Low_RNA-Pro_Corr
SAE1	0.46409	0.306741	Group1:High_DNA-RNA_Corr & Low_RNA-Pro_Corr
SAMD8	0.458096	0.112863	Group1:High_DNA-RNA_Corr & Low_RNA-Pro_Corr
SAMM50	0.508437	0.182265	Group1:High_DNA-RNA_Corr & Low_RNA-Pro_Corr
SAP18	0.574868	-0.0127048	Group1:High_DNA-RNA_Corr & Low_RNA-Pro_Corr
SAP30BP	0.631745	0.30146	Group1:High_DNA-RNA_Corr & Low_RNA-Pro_Corr
SARNP	0.448925	0.19281	Group1:High_DNA-RNA_Corr & Low_RNA-Pro_Corr
SART1	0.433291	0.22897	Group1:High_DNA-RNA_Corr & Low_RNA-Pro_Corr
SASS6	0.464162	0.289197	Group1:High_DNA-RNA_Corr & Low_RNA-Pro_Corr
SAYSD1	0.516217	0.299669	Group1:High_DNA-RNA_Corr & Low_RNA-Pro_Corr
SCFD2	0.517322	0.219542	Group1:High_DNA-RNA_Corr & Low_RNA-Pro_Corr
SCNM1	0.517425	0.246082	Group1:High_DNA-RNA_Corr & Low_RNA-Pro_Corr
SDF2	0.503839	0.194451	Group1:High_DNA-RNA_Corr & Low_RNA-Pro_Corr
SDHAF1	0.436732	0.110042	Group1:High_DNA-RNA_Corr & Low_RNA-Pro_Corr
SDHAF2	0.555898	0.164166	Group1:High_DNA-RNA_Corr & Low_RNA-Pro_Corr
SDHB	0.535684	0.171916	Group1:High_DNA-RNA_Corr & Low_RNA-Pro_Corr
SDHC	0.473691	0.054535	Group1:High_DNA-RNA_Corr & Low_RNA-Pro_Corr
SDHD	0.492505	0.0938019	Group1:High_DNA-RNA_Corr & Low_RNA-Pro_Corr
SEC11A	0.617623	0.163616	Group1:High_DNA-RNA_Corr & Low_RNA-Pro_Corr
SEC13	0.491113	0.251071	Group1:High_DNA-RNA_Corr & Low_RNA-Pro_Corr
SEC14L3	0.6	-0.0857143	Group1:High_DNA-RNA_Corr & Low_RNA-Pro_Corr
SEC22A	0.57073	0.246632	Group1:High_DNA-RNA_Corr & Low_RNA-Pro_Corr
SEC61B	0.456788	0.12372	Group1:High_DNA-RNA_Corr & Low_RNA-Pro_Corr
SEC61G	0.433	0.111923	Group1:High_DNA-RNA_Corr & Low_RNA-Pro_Corr
SEH1L	0.605768	0.165762	Group1:High_DNA-RNA_Corr & Low_RNA-Pro_Corr
SEL1L	0.446043	0.287899	Group1:High_DNA-RNA_Corr & Low_RNA-Pro_Corr
SELENOF	0.488276	0.181783	Group1:High_DNA-RNA_Corr & Low_RNA-Pro_Corr
SELENOH	0.524109	0.251313	Group1:High_DNA-RNA_Corr & Low_RNA-Pro_Corr
SEMA4F	0.499139	0.1	Group1:High_DNA-RNA_Corr & Low_RNA-Pro_Corr
SENP5	0.778568	0.285626	Group1:High_DNA-RNA_Corr & Low_RNA-Pro_Corr
2021-09-02	0.640064	0.192585	Group1:High_DNA-RNA_Corr & Low_RNA-Pro_Corr
SERINC1	0.462856	0.251386	Group1:High_DNA-RNA_Corr & Low_RNA-Pro_Corr
SERINC2	0.574095	-0.0285714	Group1:High_DNA-RNA_Corr & Low_RNA-Pro_Corr
SETD6	0.532195	0.185369	Group1:High_DNA-RNA_Corr & Low_RNA-Pro_Corr
SF3A3	0.614975	0.19012	Group1:High_DNA-RNA_Corr & Low_RNA-Pro_Corr
SF3B1	0.592062	0.208964	Group1:High_DNA-RNA_Corr & Low_RNA-Pro_Corr
SF3B2	0.557705	0.194712	Group1:High_DNA-RNA_Corr & Low_RNA-Pro_Corr
SF3B4	0.522624	0.306174	Group1:High_DNA-RNA_Corr & Low_RNA-Pro_Corr
SF3B5	0.523475	0.0418371	Group1:High_DNA-RNA_Corr & Low_RNA-Pro_Corr
SF3B6	0.467052	0.168783	Group1:High_DNA-RNA_Corr & Low_RNA-Pro_Corr
SFR1	0.462126	0.2625	Group1:High_DNA-RNA_Corr & Low_RNA-Pro_Corr
SFSWAP	0.49232	0.308147	Group1:High_DNA-RNA_Corr & Low_RNA-Pro_Corr
SFT2D1	0.511282	-0.0166667	Group1:High_DNA-RNA_Corr & Low_RNA-Pro_Corr
SGF29	0.446645	0.105751	Group1:High_DNA-RNA_Corr & Low_RNA-Pro_Corr
SH3BP5L	0.498359	0.240362	Group1:High_DNA-RNA_Corr & Low_RNA-Pro_Corr
SHARPIN	0.598795	0.289083	Group1:High_DNA-RNA_Corr & Low_RNA-Pro_Corr
SHISA5	0.512917	0.0491018	Group1:High_DNA-RNA_Corr & Low_RNA-Pro_Corr
SHPRH	0.483481	0.249333	Group1:High_DNA-RNA_Corr & Low_RNA-Pro_Corr
SIAH1	0.656254	0.225542	Group1:High_DNA-RNA_Corr & Low_RNA-Pro_Corr
SIGMAR1	0.534427	0.242217	Group1:High_DNA-RNA_Corr & Low_RNA-Pro_Corr
SIKE1	0.569026	0.157166	Group1:High_DNA-RNA_Corr & Low_RNA-Pro_Corr
SIRT7	0.565472	0.273214	Group1:High_DNA-RNA_Corr & Low_RNA-Pro_Corr
SKIV2L2	0.535894	0.2739	Group1:High_DNA-RNA_Corr & Low_RNA-Pro_Corr
SKP1	0.45778	0.291714	Group1:High_DNA-RNA_Corr & Low_RNA-Pro_Corr
SLC17A1	0.483436	0.153428	Group1:High_DNA-RNA_Corr & Low_RNA-Pro_Corr
SLC22A4	0.571999	0.171161	Group1:High_DNA-RNA_Corr & Low_RNA-Pro_Corr
SLC25A17	0.473645	0.185961	Group1:High_DNA-RNA_Corr & Low_RNA-Pro_Corr
SLC25A44	0.547796	0.211586	Group1:High_DNA-RNA_Corr & Low_RNA-Pro_Corr
SLC25A51	0.52162	0.259	Group1:High_DNA-RNA_Corr & Low_RNA-Pro_Corr
SLC30A6	0.60222	0.0690167	Group1:High_DNA-RNA_Corr & Low_RNA-Pro_Corr
SLC30A7	0.505477	0.239823	Group1:High_DNA-RNA_Corr & Low_RNA-Pro_Corr
SLC35C2	0.636809	0.18972	Group1:High_DNA-RNA_Corr & Low_RNA-Pro_Corr
SLC38A9	0.593891	0.100873	Group1:High_DNA-RNA_Corr & Low_RNA-Pro_Corr
SLC41A2	0.474201	0.0530176	Group1:High_DNA-RNA_Corr & Low_RNA-Pro_Corr
SLC47A2	0.539109	0.0405708	Group1:High_DNA-RNA_Corr & Low_RNA-Pro_Corr
SLF2	0.490145	0.245026	Group1:High_DNA-RNA_Corr & Low_RNA-Pro_Corr
SLIRP	0.470819	0.190697	Group1:High_DNA-RNA_Corr & Low_RNA-Pro_Corr
SLTM	0.532115	0.293534	Group1:High_DNA-RNA_Corr & Low_RNA-Pro_Corr
SLX4	0.446495	0.185742	Group1:High_DNA-RNA_Corr & Low_RNA-Pro_Corr
SMARCA5	0.57932	0.150843	Group1:High_DNA-RNA_Corr & Low_RNA-Pro_Corr
SMARCB1	0.537153	0.134217	Group1:High_DNA-RNA_Corr & Low_RNA-Pro_Corr
SMARCD2	0.492671	0.224896	Group1:High_DNA-RNA_Corr & Low_RNA-Pro_Corr
SMARCE1	0.538415	0.203575	Group1:High_DNA-RNA_Corr & Low_RNA-Pro_Corr
SMC5	0.555761	0.207983	Group1:High_DNA-RNA_Corr & Low_RNA-Pro_Corr
SMCR8	0.506497	0.253005	Group1:High_DNA-RNA_Corr & Low_RNA-Pro_Corr
SMG6	0.453836	0.283206	Group1:High_DNA-RNA_Corr & Low_RNA-Pro_Corr
SMIM15	0.476868	0.0506967	Group1:High_DNA-RNA_Corr & Low_RNA-Pro_Corr
SMIM19	0.533685	0.172547	Group1:High_DNA-RNA_Corr & Low_RNA-Pro_Corr
SMIM8	0.564129	0.198955	Group1:High_DNA-RNA_Corr & Low_RNA-Pro_Corr
SMOX	0.436317	-0.273349	Group1:High_DNA-RNA_Corr & Low_RNA-Pro_Corr
SMPD4	0.438486	0.271382	Group1:High_DNA-RNA_Corr & Low_RNA-Pro_Corr
SMU1	0.777756	0.242826	Group1:High_DNA-RNA_Corr & Low_RNA-Pro_Corr
SMUG1	0.531017	0.256431	Group1:High_DNA-RNA_Corr & Low_RNA-Pro_Corr
SMURF1	0.555773	0.0813937	Group1:High_DNA-RNA_Corr & Low_RNA-Pro_Corr
SMYD4	0.515454	0.210841	Group1:High_DNA-RNA_Corr & Low_RNA-Pro_Corr
SNAPC1	0.561047	0.0712074	Group1:High_DNA-RNA_Corr & Low_RNA-Pro_Corr
SNAPC3	0.642721	0.241294	Group1:High_DNA-RNA_Corr & Low_RNA-Pro_Corr
SNAPC5	0.46118	0.28968	Group1:High_DNA-RNA_Corr & Low_RNA-Pro_Corr
SNAPIN	0.437404	0.0945628	Group1:High_DNA-RNA_Corr & Low_RNA-Pro_Corr
SNF8	0.52894	0.120145	Group1:High_DNA-RNA_Corr & Low_RNA-Pro_Corr
SNIP1	0.654643	0.303152	Group1:High_DNA-RNA_Corr & Low_RNA-Pro_Corr
SNRNP35	0.503359	0.0526263	Group1:High_DNA-RNA_Corr & Low_RNA-Pro_Corr
SNRNP40	0.582454	0.144407	Group1:High_DNA-RNA_Corr & Low_RNA-Pro_Corr
SNRNP48	0.528425	0.169319	Group1:High_DNA-RNA_Corr & Low_RNA-Pro_Corr
SNRPB	0.491999	0.0418072	Group1:High_DNA-RNA_Corr & Low_RNA-Pro_Corr
SNRPB2	0.579967	0.113555	Group1:High_DNA-RNA_Corr & Low_RNA-Pro_Corr
SNRPC	0.573538	0.195577	Group1:High_DNA-RNA_Corr & Low_RNA-Pro_Corr
SNRPD1	0.507261	0.168296	Group1:High_DNA-RNA_Corr & Low_RNA-Pro_Corr
SNRPD3	0.515229	0.149454	Group1:High_DNA-RNA_Corr & Low_RNA-Pro_Corr
SNRPE	0.471769	0.00533777	Group1:High_DNA-RNA_Corr & Low_RNA-Pro_Corr
SNRPF	0.459474	0.105804	Group1:High_DNA-RNA_Corr & Low_RNA-Pro_Corr
SNU13	0.524439	0.137399	Group1:High_DNA-RNA_Corr & Low_RNA-Pro_Corr
SNW1	0.687556	0.225598	Group1:High_DNA-RNA_Corr & Low_RNA-Pro_Corr
SNX11	0.456169	0.212488	Group1:High_DNA-RNA_Corr & Low_RNA-Pro_Corr
SNX13	0.591838	0.268112	Group1:High_DNA-RNA_Corr & Low_RNA-Pro_Corr
SNX14	0.502757	0.261718	Group1:High_DNA-RNA_Corr & Low_RNA-Pro_Corr
SNX17	0.476207	0.252618	Group1:High_DNA-RNA_Corr & Low_RNA-Pro_Corr
SNX19	0.594616	0.185959	Group1:High_DNA-RNA_Corr & Low_RNA-Pro_Corr
SNX4	0.527071	0.200526	Group1:High_DNA-RNA_Corr & Low_RNA-Pro_Corr
SNX5	0.538205	0.280006	Group1:High_DNA-RNA_Corr & Low_RNA-Pro_Corr
SNX6	0.507547	0.252765	Group1:High_DNA-RNA_Corr & Low_RNA-Pro_Corr
SON	0.506022	0.305988	Group1:High_DNA-RNA_Corr & Low_RNA-Pro_Corr
SPATA2	0.534196	0.162896	Group1:High_DNA-RNA_Corr & Low_RNA-Pro_Corr
SPATA2L	0.480711	-0.103827	Group1:High_DNA-RNA_Corr & Low_RNA-Pro_Corr
SPCS1	0.519569	0.12347	Group1:High_DNA-RNA_Corr & Low_RNA-Pro_Corr
SPCS2	0.469498	0.247838	Group1:High_DNA-RNA_Corr & Low_RNA-Pro_Corr
SPG11	0.632884	0.186859	Group1:High_DNA-RNA_Corr & Low_RNA-Pro_Corr
SPG7	0.603372	0.14319	Group1:High_DNA-RNA_Corr & Low_RNA-Pro_Corr
SPIDR	0.547035	0.279475	Group1:High_DNA-RNA_Corr & Low_RNA-Pro_Corr
SPNS1	0.489368	0.246241	Group1:High_DNA-RNA_Corr & Low_RNA-Pro_Corr
SPOP	0.500712	0.0881829	Group1:High_DNA-RNA_Corr & Low_RNA-Pro_Corr
SPPL2A	0.493287	0.249634	Group1:High_DNA-RNA_Corr & Low_RNA-Pro_Corr
SPPL3	0.514146	0.125524	Group1:High_DNA-RNA_Corr & Low_RNA-Pro_Corr
SPTY2D1	0.57403	0.274113	Group1:High_DNA-RNA_Corr & Low_RNA-Pro_Corr
SREBF2	0.466634	0.265304	Group1:High_DNA-RNA_Corr & Low_RNA-Pro_Corr
SREK1IP1	0.574231	0.296749	Group1:High_DNA-RNA_Corr & Low_RNA-Pro_Corr
SRF	0.488097	0.279295	Group1:High_DNA-RNA_Corr & Low_RNA-Pro_Corr
SRP14	0.55104	0.285404	Group1:High_DNA-RNA_Corr & Low_RNA-Pro_Corr
SRP19	0.47928	0.17516	Group1:High_DNA-RNA_Corr & Low_RNA-Pro_Corr
SRP68	0.633444	0.272111	Group1:High_DNA-RNA_Corr & Low_RNA-Pro_Corr
SRP72	0.47868	0.20467	Group1:High_DNA-RNA_Corr & Low_RNA-Pro_Corr
SRP9	0.504096	0.239045	Group1:High_DNA-RNA_Corr & Low_RNA-Pro_Corr
SRSF10	0.494499	0.242982	Group1:High_DNA-RNA_Corr & Low_RNA-Pro_Corr
SRSF11	0.52691	0.294315	Group1:High_DNA-RNA_Corr & Low_RNA-Pro_Corr
SRSF2	0.536472	0.262907	Group1:High_DNA-RNA_Corr & Low_RNA-Pro_Corr
SRSF5	0.513911	0.279452	Group1:High_DNA-RNA_Corr & Low_RNA-Pro_Corr
SRSF8	0.522277	0.29764	Group1:High_DNA-RNA_Corr & Low_RNA-Pro_Corr
SS18	0.694203	0.250211	Group1:High_DNA-RNA_Corr & Low_RNA-Pro_Corr
SSR2	0.436104	-0.072858	Group1:High_DNA-RNA_Corr & Low_RNA-Pro_Corr
SSU72	0.494502	0.229703	Group1:High_DNA-RNA_Corr & Low_RNA-Pro_Corr
ST7	0.521646	0.254468	Group1:High_DNA-RNA_Corr & Low_RNA-Pro_Corr
STIL	0.482943	-0.0629515	Group1:High_DNA-RNA_Corr & Low_RNA-Pro_Corr
STK11IP	0.438352	0.256771	Group1:High_DNA-RNA_Corr & Low_RNA-Pro_Corr
STK19	0.453955	0.207315	Group1:High_DNA-RNA_Corr & Low_RNA-Pro_Corr
STK25	0.543763	0.260235	Group1:High_DNA-RNA_Corr & Low_RNA-Pro_Corr
STK35	0.540303	0.172701	Group1:High_DNA-RNA_Corr & Low_RNA-Pro_Corr
STMP1	0.554179	0.3	Group1:High_DNA-RNA_Corr & Low_RNA-Pro_Corr
STRADA	0.493958	0.222737	Group1:High_DNA-RNA_Corr & Low_RNA-Pro_Corr
STRIP1	0.577133	0.263653	Group1:High_DNA-RNA_Corr & Low_RNA-Pro_Corr
STX16	0.520568	0.206834	Group1:High_DNA-RNA_Corr & Low_RNA-Pro_Corr
STX19	0.476404	0.190909	Group1:High_DNA-RNA_Corr & Low_RNA-Pro_Corr
STX4	0.494259	0.264655	Group1:High_DNA-RNA_Corr & Low_RNA-Pro_Corr
STYXL1	0.608686	0.103937	Group1:High_DNA-RNA_Corr & Low_RNA-Pro_Corr
SUDS3	0.567025	0.224186	Group1:High_DNA-RNA_Corr & Low_RNA-Pro_Corr
SUGP1	0.433665	0.264059	Group1:High_DNA-RNA_Corr & Low_RNA-Pro_Corr
SUMO2	0.448319	0.215214	Group1:High_DNA-RNA_Corr & Low_RNA-Pro_Corr
SUMO3	0.536779	0.298606	Group1:High_DNA-RNA_Corr & Low_RNA-Pro_Corr
SUPT20H	0.604984	0.103721	Group1:High_DNA-RNA_Corr & Low_RNA-Pro_Corr
SUPT4H1	0.553533	0.0345744	Group1:High_DNA-RNA_Corr & Low_RNA-Pro_Corr
SUPT7L	0.478351	0.0440032	Group1:High_DNA-RNA_Corr & Low_RNA-Pro_Corr
SVBP	0.451243	0.283704	Group1:High_DNA-RNA_Corr & Low_RNA-Pro_Corr
SYF2	0.510507	0.198277	Group1:High_DNA-RNA_Corr & Low_RNA-Pro_Corr
SYNJ2BP	0.453515	0.178146	Group1:High_DNA-RNA_Corr & Low_RNA-Pro_Corr
TAB1	0.515507	0.152351	Group1:High_DNA-RNA_Corr & Low_RNA-Pro_Corr
TADA1	0.655209	0.166245	Group1:High_DNA-RNA_Corr & Low_RNA-Pro_Corr
TADA2A	0.485223	-0.0295806	Group1:High_DNA-RNA_Corr & Low_RNA-Pro_Corr
TADA2B	0.516225	0.103417	Group1:High_DNA-RNA_Corr & Low_RNA-Pro_Corr
TAF10	0.513322	0.0400081	Group1:High_DNA-RNA_Corr & Low_RNA-Pro_Corr
TAF11	0.684871	0.179704	Group1:High_DNA-RNA_Corr & Low_RNA-Pro_Corr
TAF12	0.524117	0.046277	Group1:High_DNA-RNA_Corr & Low_RNA-Pro_Corr
TAF13	0.465324	-0.113528	Group1:High_DNA-RNA_Corr & Low_RNA-Pro_Corr
TAF1A	0.43124	0.0950688	Group1:High_DNA-RNA_Corr & Low_RNA-Pro_Corr
TAF1B	0.532294	0.0452244	Group1:High_DNA-RNA_Corr & Low_RNA-Pro_Corr
TAF1C	0.683988	-0.452399	Group1:High_DNA-RNA_Corr & Low_RNA-Pro_Corr
TAF3	0.465983	0.166154	Group1:High_DNA-RNA_Corr & Low_RNA-Pro_Corr
TAF4	0.522753	0.287398	Group1:High_DNA-RNA_Corr & Low_RNA-Pro_Corr
TAF5L	0.659955	0.254116	Group1:High_DNA-RNA_Corr & Low_RNA-Pro_Corr
TAF6	0.498939	0.177108	Group1:High_DNA-RNA_Corr & Low_RNA-Pro_Corr
TAF6L	0.465423	0.260297	Group1:High_DNA-RNA_Corr & Low_RNA-Pro_Corr
TAF8	0.529372	0.139654	Group1:High_DNA-RNA_Corr & Low_RNA-Pro_Corr
TANGO2	0.447048	0.2697	Group1:High_DNA-RNA_Corr & Low_RNA-Pro_Corr
TAOK1	0.439429	0.294709	Group1:High_DNA-RNA_Corr & Low_RNA-Pro_Corr
TAZ	0.469187	0.238667	Group1:High_DNA-RNA_Corr & Low_RNA-Pro_Corr
TBC1D10B	0.446161	0.278717	Group1:High_DNA-RNA_Corr & Low_RNA-Pro_Corr
TBC1D14	0.609196	0.215851	Group1:High_DNA-RNA_Corr & Low_RNA-Pro_Corr
TBC1D31	0.493999	-0.0262391	Group1:High_DNA-RNA_Corr & Low_RNA-Pro_Corr
TBC1D32	0.652448	0.0666667	Group1:High_DNA-RNA_Corr & Low_RNA-Pro_Corr
TBCK	0.53904	0.149668	Group1:High_DNA-RNA_Corr & Low_RNA-Pro_Corr
TBL3	0.445786	0.262447	Group1:High_DNA-RNA_Corr & Low_RNA-Pro_Corr
TBP	0.586298	0.257186	Group1:High_DNA-RNA_Corr & Low_RNA-Pro_Corr
TBPL1	0.608931	0.289421	Group1:High_DNA-RNA_Corr & Low_RNA-Pro_Corr
TBRG1	0.659479	0.0416143	Group1:High_DNA-RNA_Corr & Low_RNA-Pro_Corr
TCEB1	0.603878	0.202373	Group1:High_DNA-RNA_Corr & Low_RNA-Pro_Corr
TCEB3	0.434529	0.138427	Group1:High_DNA-RNA_Corr & Low_RNA-Pro_Corr
TCERG1	0.443573	0.300288	Group1:High_DNA-RNA_Corr & Low_RNA-Pro_Corr
TCHP	0.449454	-0.0336356	Group1:High_DNA-RNA_Corr & Low_RNA-Pro_Corr
TCTN3	0.642776	0.223022	Group1:High_DNA-RNA_Corr & Low_RNA-Pro_Corr
TEDC1	0.638263	0.260069	Group1:High_DNA-RNA_Corr & Low_RNA-Pro_Corr
TEFM	0.496006	0.226408	Group1:High_DNA-RNA_Corr & Low_RNA-Pro_Corr
TELO2	0.509879	0.187951	Group1:High_DNA-RNA_Corr & Low_RNA-Pro_Corr
TENT2	0.562874	0.204114	Group1:High_DNA-RNA_Corr & Low_RNA-Pro_Corr
TEPSIN	0.471597	0.0392408	Group1:High_DNA-RNA_Corr & Low_RNA-Pro_Corr
TERF1	0.560632	0.246742	Group1:High_DNA-RNA_Corr & Low_RNA-Pro_Corr
TESK1	0.457101	-0.0112665	Group1:High_DNA-RNA_Corr & Low_RNA-Pro_Corr
TET2	0.524989	0.183377	Group1:High_DNA-RNA_Corr & Low_RNA-Pro_Corr
TET3	0.519529	0.139043	Group1:High_DNA-RNA_Corr & Low_RNA-Pro_Corr
TEX261	0.489604	-0.252941	Group1:High_DNA-RNA_Corr & Low_RNA-Pro_Corr
TFIP11	0.605248	0.236343	Group1:High_DNA-RNA_Corr & Low_RNA-Pro_Corr
TGDS	0.70181	0.237883	Group1:High_DNA-RNA_Corr & Low_RNA-Pro_Corr
THAP1	0.441961	-0.29807	Group1:High_DNA-RNA_Corr & Low_RNA-Pro_Corr
THAP11	0.512329	0.229541	Group1:High_DNA-RNA_Corr & Low_RNA-Pro_Corr
THAP3	0.63072	-0.323805	Group1:High_DNA-RNA_Corr & Low_RNA-Pro_Corr
THAP7	0.657812	-0.216783	Group1:High_DNA-RNA_Corr & Low_RNA-Pro_Corr
THAP9	0.476149	-0.107973	Group1:High_DNA-RNA_Corr & Low_RNA-Pro_Corr
THOC5	0.487943	0.229543	Group1:High_DNA-RNA_Corr & Low_RNA-Pro_Corr
THOC6	0.481149	0.118085	Group1:High_DNA-RNA_Corr & Low_RNA-Pro_Corr
THOC7	0.430611	0.0199647	Group1:High_DNA-RNA_Corr & Low_RNA-Pro_Corr
THUMPD2	0.445554	0.150543	Group1:High_DNA-RNA_Corr & Low_RNA-Pro_Corr
TIAL1	0.569196	0.266116	Group1:High_DNA-RNA_Corr & Low_RNA-Pro_Corr
TIAM2	0.445495	0.199652	Group1:High_DNA-RNA_Corr & Low_RNA-Pro_Corr
TIMM22	0.630859	0.0983637	Group1:High_DNA-RNA_Corr & Low_RNA-Pro_Corr
TIMM23	0.536544	0.255208	Group1:High_DNA-RNA_Corr & Low_RNA-Pro_Corr
TIMM29	0.53864	0.14247	Group1:High_DNA-RNA_Corr & Low_RNA-Pro_Corr
TIMM8B	0.512439	0.306118	Group1:High_DNA-RNA_Corr & Low_RNA-Pro_Corr
TINF2	0.576191	0.156904	Group1:High_DNA-RNA_Corr & Low_RNA-Pro_Corr
TIRAP	0.584966	-0.115404	Group1:High_DNA-RNA_Corr & Low_RNA-Pro_Corr
TJAP1	0.459101	0.273444	Group1:High_DNA-RNA_Corr & Low_RNA-Pro_Corr
TLR9	0.527409	0.3	Group1:High_DNA-RNA_Corr & Low_RNA-Pro_Corr
TM2D3	0.619656	0.207013	Group1:High_DNA-RNA_Corr & Low_RNA-Pro_Corr
TMCC1	0.470375	0.278618	Group1:High_DNA-RNA_Corr & Low_RNA-Pro_Corr
TMED10	0.570555	0.307999	Group1:High_DNA-RNA_Corr & Low_RNA-Pro_Corr
TMED2	0.468992	0.248189	Group1:High_DNA-RNA_Corr & Low_RNA-Pro_Corr
TMEM102	0.471228	0.209629	Group1:High_DNA-RNA_Corr & Low_RNA-Pro_Corr
TMEM11	0.479542	0.155312	Group1:High_DNA-RNA_Corr & Low_RNA-Pro_Corr
TMEM115	0.492236	0.310571	Group1:High_DNA-RNA_Corr & Low_RNA-Pro_Corr
TMEM126B	0.453776	0.11296	Group1:High_DNA-RNA_Corr & Low_RNA-Pro_Corr
TMEM129	0.615638	0.29554	Group1:High_DNA-RNA_Corr & Low_RNA-Pro_Corr
TMEM135	0.477546	0.244961	Group1:High_DNA-RNA_Corr & Low_RNA-Pro_Corr
TMEM14C	0.467223	0.118997	Group1:High_DNA-RNA_Corr & Low_RNA-Pro_Corr
TMEM167A	0.489948	0.251294	Group1:High_DNA-RNA_Corr & Low_RNA-Pro_Corr
TMEM167B	0.47491	0.309528	Group1:High_DNA-RNA_Corr & Low_RNA-Pro_Corr
TMEM175	0.558626	0.284372	Group1:High_DNA-RNA_Corr & Low_RNA-Pro_Corr
TMEM184A	0.714906	0.234756	Group1:High_DNA-RNA_Corr & Low_RNA-Pro_Corr
TMEM185B	0.638708	0.251578	Group1:High_DNA-RNA_Corr & Low_RNA-Pro_Corr
TMEM199	0.562176	0.274661	Group1:High_DNA-RNA_Corr & Low_RNA-Pro_Corr
TMEM209	0.565063	0.257928	Group1:High_DNA-RNA_Corr & Low_RNA-Pro_Corr
TMEM237	0.510533	0.132304	Group1:High_DNA-RNA_Corr & Low_RNA-Pro_Corr
TMEM259	0.43865	0.280778	Group1:High_DNA-RNA_Corr & Low_RNA-Pro_Corr
TMEM260	0.454613	0.159706	Group1:High_DNA-RNA_Corr & Low_RNA-Pro_Corr
TMEM30A	0.450055	0.126382	Group1:High_DNA-RNA_Corr & Low_RNA-Pro_Corr
TMEM30B	0.456737	0.282841	Group1:High_DNA-RNA_Corr & Low_RNA-Pro_Corr
TMEM38B	0.501944	0.308391	Group1:High_DNA-RNA_Corr & Low_RNA-Pro_Corr
TMEM39A	0.658965	0.097728	Group1:High_DNA-RNA_Corr & Low_RNA-Pro_Corr
TMEM44	0.676446	0.3	Group1:High_DNA-RNA_Corr & Low_RNA-Pro_Corr
TMEM57	0.545575	0.302747	Group1:High_DNA-RNA_Corr & Low_RNA-Pro_Corr
TMEM67	0.498798	0.119768	Group1:High_DNA-RNA_Corr & Low_RNA-Pro_Corr
TMEM69	0.474879	0.167491	Group1:High_DNA-RNA_Corr & Low_RNA-Pro_Corr
TMEM8A	0.482562	0.258647	Group1:High_DNA-RNA_Corr & Low_RNA-Pro_Corr
TMEM9B	0.476773	0.282667	Group1:High_DNA-RNA_Corr & Low_RNA-Pro_Corr
TMPPE	0.463217	0.278456	Group1:High_DNA-RNA_Corr & Low_RNA-Pro_Corr
TMSB4Y	0.734748	0.117086	Group1:High_DNA-RNA_Corr & Low_RNA-Pro_Corr
TNFAIP1	0.482428	0.144807	Group1:High_DNA-RNA_Corr & Low_RNA-Pro_Corr
TNIP2	0.503064	0.076849	Group1:High_DNA-RNA_Corr & Low_RNA-Pro_Corr
TNKS	0.712999	0.28584	Group1:High_DNA-RNA_Corr & Low_RNA-Pro_Corr
TNKS2	0.711777	-0.0329263	Group1:High_DNA-RNA_Corr & Low_RNA-Pro_Corr
TNPO1	0.450299	0.272276	Group1:High_DNA-RNA_Corr & Low_RNA-Pro_Corr
TNRC6A	0.547175	0.142077	Group1:High_DNA-RNA_Corr & Low_RNA-Pro_Corr
TOGARAM1	0.864803	0.107259	Group1:High_DNA-RNA_Corr & Low_RNA-Pro_Corr
TOMM20	0.622857	0.0650389	Group1:High_DNA-RNA_Corr & Low_RNA-Pro_Corr
TOMM22	0.500896	0.259049	Group1:High_DNA-RNA_Corr & Low_RNA-Pro_Corr
TOMM5	0.529513	0.11703	Group1:High_DNA-RNA_Corr & Low_RNA-Pro_Corr
TOMM6	0.555569	0.0707548	Group1:High_DNA-RNA_Corr & Low_RNA-Pro_Corr
TOP1MT	0.607009	0.125071	Group1:High_DNA-RNA_Corr & Low_RNA-Pro_Corr
TOP3B	0.514032	0.209693	Group1:High_DNA-RNA_Corr & Low_RNA-Pro_Corr
TOPORS	0.686285	0.0343424	Group1:High_DNA-RNA_Corr & Low_RNA-Pro_Corr
TOX4	0.71676	0.106442	Group1:High_DNA-RNA_Corr & Low_RNA-Pro_Corr
TP53RK	0.557243	0.0835542	Group1:High_DNA-RNA_Corr & Low_RNA-Pro_Corr
TPRA1	0.59618	0.183333	Group1:High_DNA-RNA_Corr & Low_RNA-Pro_Corr
TPT1	0.47533	0.234266	Group1:High_DNA-RNA_Corr & Low_RNA-Pro_Corr
TRAF7	0.449451	0.269133	Group1:High_DNA-RNA_Corr & Low_RNA-Pro_Corr
TRAPPC1	0.50403	0.143503	Group1:High_DNA-RNA_Corr & Low_RNA-Pro_Corr
TRAPPC11	0.718369	0.15749	Group1:High_DNA-RNA_Corr & Low_RNA-Pro_Corr
TRAPPC13	0.51025	0.13254	Group1:High_DNA-RNA_Corr & Low_RNA-Pro_Corr
TRAPPC2L	0.516838	0.240327	Group1:High_DNA-RNA_Corr & Low_RNA-Pro_Corr
TRAPPC3	0.548154	0.278773	Group1:High_DNA-RNA_Corr & Low_RNA-Pro_Corr
TRAPPC4	0.531217	0.193664	Group1:High_DNA-RNA_Corr & Low_RNA-Pro_Corr
TRAPPC9	0.517197	0.156473	Group1:High_DNA-RNA_Corr & Low_RNA-Pro_Corr
TRIAP1	0.465443	0.299361	Group1:High_DNA-RNA_Corr & Low_RNA-Pro_Corr
TRIM11	0.443608	0.206037	Group1:High_DNA-RNA_Corr & Low_RNA-Pro_Corr
TRIM13	0.526174	0.0932846	Group1:High_DNA-RNA_Corr & Low_RNA-Pro_Corr
TRIM23	0.660911	-0.0353659	Group1:High_DNA-RNA_Corr & Low_RNA-Pro_Corr
TRIM37	0.606477	0.214242	Group1:High_DNA-RNA_Corr & Low_RNA-Pro_Corr
TRIM41	0.558716	0.19144	Group1:High_DNA-RNA_Corr & Low_RNA-Pro_Corr
TRIM56	0.43945	0.246656	Group1:High_DNA-RNA_Corr & Low_RNA-Pro_Corr
TRIP4	0.518115	0.282584	Group1:High_DNA-RNA_Corr & Low_RNA-Pro_Corr
TRMT11	0.545764	0.280914	Group1:High_DNA-RNA_Corr & Low_RNA-Pro_Corr
TRMT112	0.460517	0.210877	Group1:High_DNA-RNA_Corr & Low_RNA-Pro_Corr
TRMT12	0.643636	-0.022148	Group1:High_DNA-RNA_Corr & Low_RNA-Pro_Corr
TRMT13	0.467175	0.245414	Group1:High_DNA-RNA_Corr & Low_RNA-Pro_Corr
TRMT44	0.578197	0.188195	Group1:High_DNA-RNA_Corr & Low_RNA-Pro_Corr
TRMT61A	0.488959	0.304502	Group1:High_DNA-RNA_Corr & Low_RNA-Pro_Corr
TRNAU1AP	0.506319	0.257912	Group1:High_DNA-RNA_Corr & Low_RNA-Pro_Corr
TROVE2	0.466092	0.258309	Group1:High_DNA-RNA_Corr & Low_RNA-Pro_Corr
TRPC4AP	0.635376	0.291883	Group1:High_DNA-RNA_Corr & Low_RNA-Pro_Corr
TRPM7	0.532891	0.17278	Group1:High_DNA-RNA_Corr & Low_RNA-Pro_Corr
TRUB2	0.610309	0.221033	Group1:High_DNA-RNA_Corr & Low_RNA-Pro_Corr
TSEN15	0.548497	0.216603	Group1:High_DNA-RNA_Corr & Low_RNA-Pro_Corr
TSPAN33	0.470958	0.301946	Group1:High_DNA-RNA_Corr & Low_RNA-Pro_Corr
TSPYL1	0.487104	0.13177	Group1:High_DNA-RNA_Corr & Low_RNA-Pro_Corr
TSSC4	0.50578	0.223293	Group1:High_DNA-RNA_Corr & Low_RNA-Pro_Corr
TSSK3	0.55467	0.16413	Group1:High_DNA-RNA_Corr & Low_RNA-Pro_Corr
TSTD2	0.669851	0.249966	Group1:High_DNA-RNA_Corr & Low_RNA-Pro_Corr
TTC13	0.497375	0.269574	Group1:High_DNA-RNA_Corr & Low_RNA-Pro_Corr
TTC17	0.578264	0.222028	Group1:High_DNA-RNA_Corr & Low_RNA-Pro_Corr
TTC3	0.459555	0.294115	Group1:High_DNA-RNA_Corr & Low_RNA-Pro_Corr
TTC6	0.692681	0.131614	Group1:High_DNA-RNA_Corr & Low_RNA-Pro_Corr
TTF1	0.653753	0.227297	Group1:High_DNA-RNA_Corr & Low_RNA-Pro_Corr
TTI2	0.652883	0.162038	Group1:High_DNA-RNA_Corr & Low_RNA-Pro_Corr
TTLL4	0.450615	0.0348362	Group1:High_DNA-RNA_Corr & Low_RNA-Pro_Corr
TTLL5	0.769813	0.142857	Group1:High_DNA-RNA_Corr & Low_RNA-Pro_Corr
TUBGCP2	0.631967	0.193505	Group1:High_DNA-RNA_Corr & Low_RNA-Pro_Corr
TUBGCP4	0.454983	0.207303	Group1:High_DNA-RNA_Corr & Low_RNA-Pro_Corr
TUBGCP5	0.48168	0.111468	Group1:High_DNA-RNA_Corr & Low_RNA-Pro_Corr
TUBGCP6	0.473952	0.14836	Group1:High_DNA-RNA_Corr & Low_RNA-Pro_Corr
TUSC2	0.49235	0.25008	Group1:High_DNA-RNA_Corr & Low_RNA-Pro_Corr
TUT1	0.500059	0.265207	Group1:High_DNA-RNA_Corr & Low_RNA-Pro_Corr
TXNDC15	0.468998	0.142039	Group1:High_DNA-RNA_Corr & Low_RNA-Pro_Corr
TXNL4A	0.498906	0.21608	Group1:High_DNA-RNA_Corr & Low_RNA-Pro_Corr
TYK2	0.44625	0.235	Group1:High_DNA-RNA_Corr & Low_RNA-Pro_Corr
TYW1	0.691969	0.262611	Group1:High_DNA-RNA_Corr & Low_RNA-Pro_Corr
TYW5	0.55704	0.294067	Group1:High_DNA-RNA_Corr & Low_RNA-Pro_Corr
U2AF1L4	0.508486	0.129103	Group1:High_DNA-RNA_Corr & Low_RNA-Pro_Corr
UBA3	0.44924	0.29955	Group1:High_DNA-RNA_Corr & Low_RNA-Pro_Corr
UBA52	0.431597	0.0107024	Group1:High_DNA-RNA_Corr & Low_RNA-Pro_Corr
UBAC1	0.559919	0.243844	Group1:High_DNA-RNA_Corr & Low_RNA-Pro_Corr
UBAP2L	0.564083	0.260586	Group1:High_DNA-RNA_Corr & Low_RNA-Pro_Corr
UBE2D2	0.540031	0.0902334	Group1:High_DNA-RNA_Corr & Low_RNA-Pro_Corr
UBE2D3	0.574034	-0.0517206	Group1:High_DNA-RNA_Corr & Low_RNA-Pro_Corr
UBE2D4	0.516191	-0.0536652	Group1:High_DNA-RNA_Corr & Low_RNA-Pro_Corr
UBE2G2	0.542687	0.173353	Group1:High_DNA-RNA_Corr & Low_RNA-Pro_Corr
UBE2I	0.501434	0.307486	Group1:High_DNA-RNA_Corr & Low_RNA-Pro_Corr
UBE2R2	0.578819	0.308398	Group1:High_DNA-RNA_Corr & Low_RNA-Pro_Corr
UBE2V1	0.614067	0.177158	Group1:High_DNA-RNA_Corr & Low_RNA-Pro_Corr
UBIAD1	0.523045	0.173359	Group1:High_DNA-RNA_Corr & Low_RNA-Pro_Corr
UBL7	0.550804	0.0154309	Group1:High_DNA-RNA_Corr & Low_RNA-Pro_Corr
UBN1	0.453952	0.127303	Group1:High_DNA-RNA_Corr & Low_RNA-Pro_Corr
UBQLN1	0.609288	0.248068	Group1:High_DNA-RNA_Corr & Low_RNA-Pro_Corr
UBXN2A	0.505564	0.180246	Group1:High_DNA-RNA_Corr & Low_RNA-Pro_Corr
UBXN8	0.643593	-0.184303	Group1:High_DNA-RNA_Corr & Low_RNA-Pro_Corr
UCK1	0.648594	0.295553	Group1:High_DNA-RNA_Corr & Low_RNA-Pro_Corr
UCKL1	0.656056	0.190183	Group1:High_DNA-RNA_Corr & Low_RNA-Pro_Corr
UCP3	0.523968	0.237762	Group1:High_DNA-RNA_Corr & Low_RNA-Pro_Corr
UGGT2	0.535179	0.311496	Group1:High_DNA-RNA_Corr & Low_RNA-Pro_Corr
UNC119	0.431089	0.235489	Group1:High_DNA-RNA_Corr & Low_RNA-Pro_Corr
UNC5CL	0.464177	0.250665	Group1:High_DNA-RNA_Corr & Low_RNA-Pro_Corr
UQCC2	0.482178	0.276166	Group1:High_DNA-RNA_Corr & Low_RNA-Pro_Corr
UQCC3	0.514223	0.294019	Group1:High_DNA-RNA_Corr & Low_RNA-Pro_Corr
UQCR10	0.443837	0.179492	Group1:High_DNA-RNA_Corr & Low_RNA-Pro_Corr
UQCRB	0.514577	0.186187	Group1:High_DNA-RNA_Corr & Low_RNA-Pro_Corr
UQCRC2	0.448755	0.243844	Group1:High_DNA-RNA_Corr & Low_RNA-Pro_Corr
UQCRFS1	0.451285	0.194139	Group1:High_DNA-RNA_Corr & Low_RNA-Pro_Corr
URB2	0.544043	0.296863	Group1:High_DNA-RNA_Corr & Low_RNA-Pro_Corr
USE1	0.442594	0.0505521	Group1:High_DNA-RNA_Corr & Low_RNA-Pro_Corr
USF1	0.467419	0.271075	Group1:High_DNA-RNA_Corr & Low_RNA-Pro_Corr
USF2	0.507454	0.24973	Group1:High_DNA-RNA_Corr & Low_RNA-Pro_Corr
USF3	0.756197	-0.189197	Group1:High_DNA-RNA_Corr & Low_RNA-Pro_Corr
USP12	0.472481	0.137455	Group1:High_DNA-RNA_Corr & Low_RNA-Pro_Corr
USP20	0.528133	0.101874	Group1:High_DNA-RNA_Corr & Low_RNA-Pro_Corr
USP33	0.562709	0.203787	Group1:High_DNA-RNA_Corr & Low_RNA-Pro_Corr
USP34	0.56486	0.247806	Group1:High_DNA-RNA_Corr & Low_RNA-Pro_Corr
USP35	0.455718	0.303824	Group1:High_DNA-RNA_Corr & Low_RNA-Pro_Corr
USP37	0.61606	0.0596195	Group1:High_DNA-RNA_Corr & Low_RNA-Pro_Corr
USP42	0.513242	0.251144	Group1:High_DNA-RNA_Corr & Low_RNA-Pro_Corr
UTP11	0.527833	0.165959	Group1:High_DNA-RNA_Corr & Low_RNA-Pro_Corr
UTP14C	0.619465	-0.311145	Group1:High_DNA-RNA_Corr & Low_RNA-Pro_Corr
UTP15	0.56464	0.196617	Group1:High_DNA-RNA_Corr & Low_RNA-Pro_Corr
UTP18	0.548513	0.273615	Group1:High_DNA-RNA_Corr & Low_RNA-Pro_Corr
UTP3	0.477812	0.102303	Group1:High_DNA-RNA_Corr & Low_RNA-Pro_Corr
UTP6	0.464741	0.259433	Group1:High_DNA-RNA_Corr & Low_RNA-Pro_Corr
VCPKMT	0.609586	0.251844	Group1:High_DNA-RNA_Corr & Low_RNA-Pro_Corr
VHL	0.44199	0.296839	Group1:High_DNA-RNA_Corr & Low_RNA-Pro_Corr
VIRMA	0.763358	0.234806	Group1:High_DNA-RNA_Corr & Low_RNA-Pro_Corr
VMA21	0.446118	0.189351	Group1:High_DNA-RNA_Corr & Low_RNA-Pro_Corr
VPS11	0.567035	0.224007	Group1:High_DNA-RNA_Corr & Low_RNA-Pro_Corr
VPS13B	0.487669	0.243579	Group1:High_DNA-RNA_Corr & Low_RNA-Pro_Corr
VPS16	0.623687	0.151809	Group1:High_DNA-RNA_Corr & Low_RNA-Pro_Corr
VPS26C	0.455308	0.155473	Group1:High_DNA-RNA_Corr & Low_RNA-Pro_Corr
VPS28	0.540896	0.167387	Group1:High_DNA-RNA_Corr & Low_RNA-Pro_Corr
VPS33A	0.51166	0.187199	Group1:High_DNA-RNA_Corr & Low_RNA-Pro_Corr
VPS35	0.539491	0.272467	Group1:High_DNA-RNA_Corr & Low_RNA-Pro_Corr
VPS35L	0.646066	0.259903	Group1:High_DNA-RNA_Corr & Low_RNA-Pro_Corr
VPS41	0.63057	0.182173	Group1:High_DNA-RNA_Corr & Low_RNA-Pro_Corr
VPS45	0.433183	0.255584	Group1:High_DNA-RNA_Corr & Low_RNA-Pro_Corr
VPS52	0.544087	0.0169981	Group1:High_DNA-RNA_Corr & Low_RNA-Pro_Corr
VPS54	0.456174	0.202683	Group1:High_DNA-RNA_Corr & Low_RNA-Pro_Corr
VPS72	0.631864	0.271796	Group1:High_DNA-RNA_Corr & Low_RNA-Pro_Corr
VPS8	0.516415	0.158782	Group1:High_DNA-RNA_Corr & Low_RNA-Pro_Corr
VPS9D1	0.493443	0.277023	Group1:High_DNA-RNA_Corr & Low_RNA-Pro_Corr
VWA9	0.449907	0.133153	Group1:High_DNA-RNA_Corr & Low_RNA-Pro_Corr
WBP1L	0.598147	-0.257143	Group1:High_DNA-RNA_Corr & Low_RNA-Pro_Corr
WDR11	0.633045	0.1753	Group1:High_DNA-RNA_Corr & Low_RNA-Pro_Corr
WDR25	0.554331	0.262969	Group1:High_DNA-RNA_Corr & Low_RNA-Pro_Corr
WDR26	0.51971	0.239961	Group1:High_DNA-RNA_Corr & Low_RNA-Pro_Corr
WDR36	0.584365	0.178178	Group1:High_DNA-RNA_Corr & Low_RNA-Pro_Corr
WDR41	0.447836	0.278869	Group1:High_DNA-RNA_Corr & Low_RNA-Pro_Corr
WDR53	0.598428	0.166021	Group1:High_DNA-RNA_Corr & Low_RNA-Pro_Corr
WDR55	0.575152	0.307456	Group1:High_DNA-RNA_Corr & Low_RNA-Pro_Corr
WDR61	0.583832	0.191914	Group1:High_DNA-RNA_Corr & Low_RNA-Pro_Corr
WDR7	0.504009	0.283972	Group1:High_DNA-RNA_Corr & Low_RNA-Pro_Corr
WDR73	0.627146	0.181594	Group1:High_DNA-RNA_Corr & Low_RNA-Pro_Corr
WDYHV1	0.581931	0.22123	Group1:High_DNA-RNA_Corr & Low_RNA-Pro_Corr
WHAMM	0.52944	0.303842	Group1:High_DNA-RNA_Corr & Low_RNA-Pro_Corr
WHSC1L1	0.646439	0.169503	Group1:High_DNA-RNA_Corr & Low_RNA-Pro_Corr
WRAP73	0.582366	0.2171	Group1:High_DNA-RNA_Corr & Low_RNA-Pro_Corr
WRB	0.462953	0.191016	Group1:High_DNA-RNA_Corr & Low_RNA-Pro_Corr
WTAP	0.498172	0.217644	Group1:High_DNA-RNA_Corr & Low_RNA-Pro_Corr
XAB2	0.440797	0.254453	Group1:High_DNA-RNA_Corr & Low_RNA-Pro_Corr
XRCC2	0.51396	0.125874	Group1:High_DNA-RNA_Corr & Low_RNA-Pro_Corr
XRCC3	0.717844	0.286157	Group1:High_DNA-RNA_Corr & Low_RNA-Pro_Corr
XRCC5	0.592388	0.256437	Group1:High_DNA-RNA_Corr & Low_RNA-Pro_Corr
XRCC6	0.555109	0.270053	Group1:High_DNA-RNA_Corr & Low_RNA-Pro_Corr
YAE1	0.567672	0.0488563	Group1:High_DNA-RNA_Corr & Low_RNA-Pro_Corr
YAE1D1	0.47184	0.032931	Group1:High_DNA-RNA_Corr & Low_RNA-Pro_Corr
YAF2	0.460298	0.16263	Group1:High_DNA-RNA_Corr & Low_RNA-Pro_Corr
YEATS2	0.628602	0.17447	Group1:High_DNA-RNA_Corr & Low_RNA-Pro_Corr
YIF1A	0.48751	0.29933	Group1:High_DNA-RNA_Corr & Low_RNA-Pro_Corr
YIPF3	0.600366	0.193615	Group1:High_DNA-RNA_Corr & Low_RNA-Pro_Corr
YME1L1	0.639285	0.166275	Group1:High_DNA-RNA_Corr & Low_RNA-Pro_Corr
YPEL3	0.477706	-0.0237427	Group1:High_DNA-RNA_Corr & Low_RNA-Pro_Corr
ZBED5	0.510806	0.0427277	Group1:High_DNA-RNA_Corr & Low_RNA-Pro_Corr
ZBED6	0.506829	0.209954	Group1:High_DNA-RNA_Corr & Low_RNA-Pro_Corr
ZBED6CL	0.468872	-0.1	Group1:High_DNA-RNA_Corr & Low_RNA-Pro_Corr
ZBTB1	0.494134	0.237301	Group1:High_DNA-RNA_Corr & Low_RNA-Pro_Corr
ZBTB11	0.589426	0.23484	Group1:High_DNA-RNA_Corr & Low_RNA-Pro_Corr
ZBTB17	0.513307	0.0146272	Group1:High_DNA-RNA_Corr & Low_RNA-Pro_Corr
ZBTB2	0.445143	0.157412	Group1:High_DNA-RNA_Corr & Low_RNA-Pro_Corr
ZBTB25	0.664342	0.242032	Group1:High_DNA-RNA_Corr & Low_RNA-Pro_Corr
ZBTB3	0.45447	0.142659	Group1:High_DNA-RNA_Corr & Low_RNA-Pro_Corr
ZBTB37	0.547521	0.197227	Group1:High_DNA-RNA_Corr & Low_RNA-Pro_Corr
ZBTB39	0.555325	-0.167473	Group1:High_DNA-RNA_Corr & Low_RNA-Pro_Corr
ZBTB43	0.554067	0.237093	Group1:High_DNA-RNA_Corr & Low_RNA-Pro_Corr
ZBTB47	0.440159	0.16571	Group1:High_DNA-RNA_Corr & Low_RNA-Pro_Corr
ZBTB48	0.491406	0.0901752	Group1:High_DNA-RNA_Corr & Low_RNA-Pro_Corr
ZC3H13	0.572292	0.189412	Group1:High_DNA-RNA_Corr & Low_RNA-Pro_Corr
ZC3H18	0.523328	0.30217	Group1:High_DNA-RNA_Corr & Low_RNA-Pro_Corr
ZC3H3	0.510255	-0.0178409	Group1:High_DNA-RNA_Corr & Low_RNA-Pro_Corr
ZC3H7B	0.480302	0.288431	Group1:High_DNA-RNA_Corr & Low_RNA-Pro_Corr
ZC3HC1	0.613418	0.149554	Group1:High_DNA-RNA_Corr & Low_RNA-Pro_Corr
ZCCHC10	0.481314	0.14706	Group1:High_DNA-RNA_Corr & Low_RNA-Pro_Corr
ZCCHC14	0.49611	-0.2	Group1:High_DNA-RNA_Corr & Low_RNA-Pro_Corr
ZCCHC17	0.527242	0.302742	Group1:High_DNA-RNA_Corr & Low_RNA-Pro_Corr
ZCCHC4	0.642762	-0.00260312	Group1:High_DNA-RNA_Corr & Low_RNA-Pro_Corr
ZCCHC7	0.651939	0.240769	Group1:High_DNA-RNA_Corr & Low_RNA-Pro_Corr
ZCCHC9	0.558678	0.226921	Group1:High_DNA-RNA_Corr & Low_RNA-Pro_Corr
ZDHHC12	0.551928	0.0735294	Group1:High_DNA-RNA_Corr & Low_RNA-Pro_Corr
ZDHHC4	0.588958	0.174656	Group1:High_DNA-RNA_Corr & Low_RNA-Pro_Corr
ZDHHC6	0.629142	0.20848	Group1:High_DNA-RNA_Corr & Low_RNA-Pro_Corr
ZDHHC7	0.483191	0.298851	Group1:High_DNA-RNA_Corr & Low_RNA-Pro_Corr
ZDHHC8	0.593452	0.285862	Group1:High_DNA-RNA_Corr & Low_RNA-Pro_Corr
ZFAND2B	0.474403	0.259406	Group1:High_DNA-RNA_Corr & Low_RNA-Pro_Corr
ZFHX2	0.463067	-0.0621352	Group1:High_DNA-RNA_Corr & Low_RNA-Pro_Corr
ZFP1	0.521052	0.181272	Group1:High_DNA-RNA_Corr & Low_RNA-Pro_Corr
ZFP14	0.567725	-0.129987	Group1:High_DNA-RNA_Corr & Low_RNA-Pro_Corr
ZFP41	0.544562	-0.4	Group1:High_DNA-RNA_Corr & Low_RNA-Pro_Corr
ZFP64	0.451449	0.159492	Group1:High_DNA-RNA_Corr & Low_RNA-Pro_Corr
ZFP69	0.448736	-0.0974678	Group1:High_DNA-RNA_Corr & Low_RNA-Pro_Corr
ZFP82	0.524605	0.192307	Group1:High_DNA-RNA_Corr & Low_RNA-Pro_Corr
ZFP90	0.486125	0.266113	Group1:High_DNA-RNA_Corr & Low_RNA-Pro_Corr
ZKSCAN4	0.507018	0.286431	Group1:High_DNA-RNA_Corr & Low_RNA-Pro_Corr
ZKSCAN5	0.603901	-0.105886	Group1:High_DNA-RNA_Corr & Low_RNA-Pro_Corr
ZMAT2	0.538296	0.282335	Group1:High_DNA-RNA_Corr & Low_RNA-Pro_Corr
ZMYM1	0.473338	0.201679	Group1:High_DNA-RNA_Corr & Low_RNA-Pro_Corr
ZMYM5	0.591178	-0.0126221	Group1:High_DNA-RNA_Corr & Low_RNA-Pro_Corr
ZNF106	0.556817	0.0119977	Group1:High_DNA-RNA_Corr & Low_RNA-Pro_Corr
ZNF112	0.515642	0.0954927	Group1:High_DNA-RNA_Corr & Low_RNA-Pro_Corr
ZNF12	0.712822	0.234628	Group1:High_DNA-RNA_Corr & Low_RNA-Pro_Corr
ZNF131	0.586459	0.301087	Group1:High_DNA-RNA_Corr & Low_RNA-Pro_Corr
ZNF133	0.691128	0.101766	Group1:High_DNA-RNA_Corr & Low_RNA-Pro_Corr
ZNF135	0.497242	0.120236	Group1:High_DNA-RNA_Corr & Low_RNA-Pro_Corr
ZNF14	0.702086	0.157995	Group1:High_DNA-RNA_Corr & Low_RNA-Pro_Corr
ZNF141	0.621062	-0.210337	Group1:High_DNA-RNA_Corr & Low_RNA-Pro_Corr
ZNF16	0.532285	0.226513	Group1:High_DNA-RNA_Corr & Low_RNA-Pro_Corr
ZNF17	0.573205	-0.66101	Group1:High_DNA-RNA_Corr & Low_RNA-Pro_Corr
ZNF174	0.502815	0.231782	Group1:High_DNA-RNA_Corr & Low_RNA-Pro_Corr
ZNF180	0.723571	-0.0361384	Group1:High_DNA-RNA_Corr & Low_RNA-Pro_Corr
ZNF184	0.55814	0.0808672	Group1:High_DNA-RNA_Corr & Low_RNA-Pro_Corr
ZNF202	0.689853	0.0536134	Group1:High_DNA-RNA_Corr & Low_RNA-Pro_Corr
ZNF207	0.507357	0.239068	Group1:High_DNA-RNA_Corr & Low_RNA-Pro_Corr
ZNF213	0.51038	0.110054	Group1:High_DNA-RNA_Corr & Low_RNA-Pro_Corr
ZNF214	0.491651	0.12157	Group1:High_DNA-RNA_Corr & Low_RNA-Pro_Corr
ZNF222	0.450731	0.0617195	Group1:High_DNA-RNA_Corr & Low_RNA-Pro_Corr
ZNF224	0.52894	0.241999	Group1:High_DNA-RNA_Corr & Low_RNA-Pro_Corr
ZNF226	0.438916	0.290265	Group1:High_DNA-RNA_Corr & Low_RNA-Pro_Corr
ZNF232	0.519089	-0.188995	Group1:High_DNA-RNA_Corr & Low_RNA-Pro_Corr
ZNF235	0.547263	0.211248	Group1:High_DNA-RNA_Corr & Low_RNA-Pro_Corr
ZNF236	0.534027	0.0023808	Group1:High_DNA-RNA_Corr & Low_RNA-Pro_Corr
ZNF251	0.685736	0.162636	Group1:High_DNA-RNA_Corr & Low_RNA-Pro_Corr
ZNF263	0.572731	-0.111689	Group1:High_DNA-RNA_Corr & Low_RNA-Pro_Corr
ZNF276	0.464623	0.295915	Group1:High_DNA-RNA_Corr & Low_RNA-Pro_Corr
ZNF277	0.599894	0.142572	Group1:High_DNA-RNA_Corr & Low_RNA-Pro_Corr
ZNF282	0.544272	0.282491	Group1:High_DNA-RNA_Corr & Low_RNA-Pro_Corr
ZNF292	0.476868	0.286634	Group1:High_DNA-RNA_Corr & Low_RNA-Pro_Corr
ZNF317	0.723011	-0.146037	Group1:High_DNA-RNA_Corr & Low_RNA-Pro_Corr
ZNF319	0.650244	0.29007	Group1:High_DNA-RNA_Corr & Low_RNA-Pro_Corr
ZNF322	0.523644	0.119399	Group1:High_DNA-RNA_Corr & Low_RNA-Pro_Corr
ZNF33B	0.443108	0.0222703	Group1:High_DNA-RNA_Corr & Low_RNA-Pro_Corr
ZNF34	0.840081	-0.00257453	Group1:High_DNA-RNA_Corr & Low_RNA-Pro_Corr
ZNF354A	0.709798	0.15232	Group1:High_DNA-RNA_Corr & Low_RNA-Pro_Corr
ZNF354B	0.649402	0.262857	Group1:High_DNA-RNA_Corr & Low_RNA-Pro_Corr
ZNF397	0.495612	0.218447	Group1:High_DNA-RNA_Corr & Low_RNA-Pro_Corr
ZNF398	0.789513	0.0705367	Group1:High_DNA-RNA_Corr & Low_RNA-Pro_Corr
ZNF407	0.581229	0.181488	Group1:High_DNA-RNA_Corr & Low_RNA-Pro_Corr
ZNF408	0.552395	0.172024	Group1:High_DNA-RNA_Corr & Low_RNA-Pro_Corr
ZNF410	0.635961	0.281081	Group1:High_DNA-RNA_Corr & Low_RNA-Pro_Corr
ZNF416	0.436435	0.26374	Group1:High_DNA-RNA_Corr & Low_RNA-Pro_Corr
ZNF430	0.44378	0.211112	Group1:High_DNA-RNA_Corr & Low_RNA-Pro_Corr
ZNF451	0.560637	0.30703	Group1:High_DNA-RNA_Corr & Low_RNA-Pro_Corr
ZNF471	0.549064	0.0895212	Group1:High_DNA-RNA_Corr & Low_RNA-Pro_Corr
ZNF493	0.519821	0.18195	Group1:High_DNA-RNA_Corr & Low_RNA-Pro_Corr
ZNF507	0.43383	0.22748	Group1:High_DNA-RNA_Corr & Low_RNA-Pro_Corr
ZNF510	0.557075	0.0218729	Group1:High_DNA-RNA_Corr & Low_RNA-Pro_Corr
ZNF511	0.494115	0.231065	Group1:High_DNA-RNA_Corr & Low_RNA-Pro_Corr
ZNF526	0.502906	0.195347	Group1:High_DNA-RNA_Corr & Low_RNA-Pro_Corr
ZNF527	0.444671	-0.00965759	Group1:High_DNA-RNA_Corr & Low_RNA-Pro_Corr
ZNF529	0.576743	0.175655	Group1:High_DNA-RNA_Corr & Low_RNA-Pro_Corr
ZNF550	0.56053	0.0205742	Group1:High_DNA-RNA_Corr & Low_RNA-Pro_Corr
ZNF557	0.739829	0.0316396	Group1:High_DNA-RNA_Corr & Low_RNA-Pro_Corr
ZNF562	0.51313	-0.13494	Group1:High_DNA-RNA_Corr & Low_RNA-Pro_Corr
ZNF565	0.447116	0.144604	Group1:High_DNA-RNA_Corr & Low_RNA-Pro_Corr
ZNF567	0.601879	0.069719	Group1:High_DNA-RNA_Corr & Low_RNA-Pro_Corr
ZNF570	0.44058	-0.135766	Group1:High_DNA-RNA_Corr & Low_RNA-Pro_Corr
ZNF573	0.448616	-0.140386	Group1:High_DNA-RNA_Corr & Low_RNA-Pro_Corr
ZNF574	0.463759	0.234481	Group1:High_DNA-RNA_Corr & Low_RNA-Pro_Corr
ZNF596	0.622858	0.0641484	Group1:High_DNA-RNA_Corr & Low_RNA-Pro_Corr
ZNF623	0.686229	0.158906	Group1:High_DNA-RNA_Corr & Low_RNA-Pro_Corr
ZNF624	0.511698	-0.022834	Group1:High_DNA-RNA_Corr & Low_RNA-Pro_Corr
ZNF627	0.520953	0.109109	Group1:High_DNA-RNA_Corr & Low_RNA-Pro_Corr
ZNF639	0.601416	0.23845	Group1:High_DNA-RNA_Corr & Low_RNA-Pro_Corr
ZNF641	0.548183	-0.00296443	Group1:High_DNA-RNA_Corr & Low_RNA-Pro_Corr
ZNF644	0.488204	0.31034	Group1:High_DNA-RNA_Corr & Low_RNA-Pro_Corr
ZNF655	0.555541	0.250088	Group1:High_DNA-RNA_Corr & Low_RNA-Pro_Corr
ZNF667	0.472439	-0.139379	Group1:High_DNA-RNA_Corr & Low_RNA-Pro_Corr
ZNF669	0.643551	0.124661	Group1:High_DNA-RNA_Corr & Low_RNA-Pro_Corr
ZNF672	0.4749	0.260077	Group1:High_DNA-RNA_Corr & Low_RNA-Pro_Corr
ZNF688	0.431075	0.251044	Group1:High_DNA-RNA_Corr & Low_RNA-Pro_Corr
ZNF691	0.542266	0.273666	Group1:High_DNA-RNA_Corr & Low_RNA-Pro_Corr
ZNF692	0.628559	-0.0457076	Group1:High_DNA-RNA_Corr & Low_RNA-Pro_Corr
ZNF708	0.503797	0.116351	Group1:High_DNA-RNA_Corr & Low_RNA-Pro_Corr
ZNF74	0.519386	-0.0191439	Group1:High_DNA-RNA_Corr & Low_RNA-Pro_Corr
ZNF746	0.577719	0.226866	Group1:High_DNA-RNA_Corr & Low_RNA-Pro_Corr
ZNF76	0.445341	0.228153	Group1:High_DNA-RNA_Corr & Low_RNA-Pro_Corr
ZNF770	0.540602	0.00407574	Group1:High_DNA-RNA_Corr & Low_RNA-Pro_Corr
ZNF786	0.511794	-0.148968	Group1:High_DNA-RNA_Corr & Low_RNA-Pro_Corr
ZNF789	0.629753	-0.139858	Group1:High_DNA-RNA_Corr & Low_RNA-Pro_Corr
ZNF791	0.581631	-0.120496	Group1:High_DNA-RNA_Corr & Low_RNA-Pro_Corr
ZNF799	0.502808	-0.179272	Group1:High_DNA-RNA_Corr & Low_RNA-Pro_Corr
ZNF800	0.508626	0.201673	Group1:High_DNA-RNA_Corr & Low_RNA-Pro_Corr
ZNF862	0.474303	-0.10303	Group1:High_DNA-RNA_Corr & Low_RNA-Pro_Corr
ZNF92	0.577034	0.184278	Group1:High_DNA-RNA_Corr & Low_RNA-Pro_Corr
ZNHIT1	0.544727	0.0583191	Group1:High_DNA-RNA_Corr & Low_RNA-Pro_Corr
ZNHIT3	0.514683	0.240163	Group1:High_DNA-RNA_Corr & Low_RNA-Pro_Corr
ZNRD1	0.564806	0.242359	Group1:High_DNA-RNA_Corr & Low_RNA-Pro_Corr
ZRANB1	0.525362	0.136309	Group1:High_DNA-RNA_Corr & Low_RNA-Pro_Corr
ZRANB3	0.453729	0.2	Group1:High_DNA-RNA_Corr & Low_RNA-Pro_Corr
ZSCAN16	0.645577	0.161089	Group1:High_DNA-RNA_Corr & Low_RNA-Pro_Corr
ZSCAN25	0.702281	0.00889973	Group1:High_DNA-RNA_Corr & Low_RNA-Pro_Corr
ZSCAN26	0.486799	0.205392	Group1:High_DNA-RNA_Corr & Low_RNA-Pro_Corr
ZSCAN29	0.641993	0.0667278	Group1:High_DNA-RNA_Corr & Low_RNA-Pro_Corr
ZSCAN32	0.646999	-0.0987755	Group1:High_DNA-RNA_Corr & Low_RNA-Pro_Corr
ZXDC	0.663094	0.202348	Group1:High_DNA-RNA_Corr & Low_RNA-Pro_Corr
ZYG11B	0.473745	0.297377	Group1:High_DNA-RNA_Corr & Low_RNA-Pro_Corr
ZZZ3	0.491421	0.286575	Group1:High_DNA-RNA_Corr & Low_RNA-Pro_Corr
A1CF	0.174765	0.589265	Group2:Low_DNA-RNA_Corr & High_RNA-Pro_Corr
A2ML1	0.100102	0.79675	Group2:Low_DNA-RNA_Corr & High_RNA-Pro_Corr
AAK1	0.220312	0.522049	Group2:Low_DNA-RNA_Corr & High_RNA-Pro_Corr
AASS	0.0634855	0.651584	Group2:Low_DNA-RNA_Corr & High_RNA-Pro_Corr
[truncated: 11,821 more rows]

## Sheet: S3B.Pan-Cancer.GOBP
Table S3B. GO (Gene Ontology) enrichment for Pan-Cancer analysis in Group1 and Group2.
ID	Enrichment_p-value	Enrichment_p-adjust	Enrichment_FDR	Enrichment_p-value	Enrichment_p-adjust	Enrichment_FDR
GOBP_2_OXOGLUTARATE_METABOLIC_PROCESS	1	1	1	0.853273	0.976915	0.687396
GOBP_3_PHOSPHOADENOSINE_5_PHOSPHOSULFATE_METABOLIC_PROCESS	1	1	1	0.00483136	0.0258192	0.0181674
GOBP_3_UTR_MEDIATED_MRNA_DESTABILIZATION	0.81783	1	0.891032	1	1	1
GOBP_3_UTR_MEDIATED_MRNA_STABILIZATION	0.909686	1	0.891032	1	1	1
GOBP_ACETYL_COA_BIOSYNTHETIC_PROCESS	0.889635	1	0.891032	0.928592	1	0.703639
GOBP_ACETYL_COA_BIOSYNTHETIC_PROCESS_FROM_PYRUVATE	0.777404	1	0.891032	0.834565	0.965945	0.679677
GOBP_ACETYL_COA_METABOLIC_PROCESS	0.977822	1	0.891032	0.25464	0.478633	0.336785
GOBP_ACID_SECRETION	1	1	1	0.47754	0.705096	0.496133
GOBP_ACIDIC_AMINO_ACID_TRANSPORT	0.998795	1	0.891032	0.130394	0.297624	0.20942
GOBP_ACROSOME_ASSEMBLY	0.798628	1	0.891032	0.853273	0.976915	0.687396
GOBP_ACROSOME_REACTION	1	1	1	0.431631	0.665831	0.468505
GOBP_ACTIN_CROSSLINK_FORMATION	1	1	1	0.00021506	0.00239452	0.00168488
GOBP_ACTIN_CYTOSKELETON_REORGANIZATION	0.656988	1	0.891032	0.00231075	0.0147723	0.0103944
GOBP_ACTIN_FILAMENT_BASED_MOVEMENT	1	1	1	0.0173555	0.0695115	0.048911
GOBP_ACTIN_FILAMENT_BASED_TRANSPORT	1	1	1	0.428951	0.662356	0.466059
GOBP_ACTIN_FILAMENT_BUNDLE_ORGANIZATION	0.968748	1	0.891032	3.82e-06	9.12e-05	6.42e-05
GOBP_ACTIN_FILAMENT_DEPOLYMERIZATION	0.980515	1	0.891032	0.00518348	0.0273824	0.0192673
GOBP_ACTIN_FILAMENT_NETWORK_FORMATION	1	1	1	0.00732624	0.0360426	0.025361
GOBP_ACTIN_FILAMENT_ORGANIZATION	0.999914	1	0.891032	9.71e-12	1.33e-09	9.35e-10
GOBP_ACTIN_FILAMENT_REORGANIZATION	0.632654	1	0.891032	0.314433	0.541187	0.3808
GOBP_ACTIN_FILAMENT_SEVERING	0.798628	1	0.891032	0.0275341	0.0954538	0.067165
GOBP_ACTIN_MEDIATED_CELL_CONTRACTION	1	1	1	0.0483462	0.146063	0.102776
GOBP_ACTIN_NUCLEATION	0.375375	1	0.891032	0.372187	0.600818	0.422759
GOBP_ACTIN_POLYMERIZATION_OR_DEPOLYMERIZATION	0.954981	1	0.891032	6.43e-05	0.00089564	0.00063021
GOBP_ACTION_POTENTIAL	0.99998	1	0.891032	0.459366	0.688396	0.484382
GOBP_ACTIVATED_T_CELL_PROLIFERATION	0.990063	1	0.891032	0.0692379	0.191691	0.134881
GOBP_ACTIVATION_OF_ADENYLATE_CYCLASE_ACTIVITY	0.979939	1	0.891032	0.990732	1	0.703639
GOBP_ACTIVATION_OF_CYSTEINE_TYPE_ENDOPEPTIDASE_ACTIVITY	1	1	1	0.834565	0.965945	0.679677
GOBP_ACTIVATION_OF_CYSTEINE_TYPE_ENDOPEPTIDASE_ACTIVITY_INVOLVED_IN_APOPTOTIC_PROCESS	0.926439	1	0.891032	0.0166259	0.0668773	0.0470575
GOBP_ACTIVATION_OF_GTPASE_ACTIVITY	0.968304	1	0.891032	0.543118	0.764802	0.538145
GOBP_ACTIVATION_OF_INNATE_IMMUNE_RESPONSE	2.15e-08	7.58e-07	6.75e-07	0.00346738	0.0202728	0.0142647
GOBP_ACTIVATION_OF_JANUS_KINASE_ACTIVITY	1	1	1	0.518193	0.738578	0.519693
GOBP_ACTIVATION_OF_JNKK_ACTIVITY	0.632654	1	0.891032	0.314433	0.541187	0.3808
GOBP_ACTIVATION_OF_JUN_KINASE_ACTIVITY	0.516696	1	0.891032	0.656658	0.867202	0.610197
GOBP_ACTIVATION_OF_MAPK_ACTIVITY	0.878155	1	0.891032	0.0641138	0.180958	0.127329
GOBP_ACTIVATION_OF_MAPKK_ACTIVITY	0.357792	1	0.891032	0.937965	1	0.703639
GOBP_ACTIVATION_OF_MAPKKK_ACTIVITY	0.319186	1	0.891032	0.762886	0.928713	0.653479
GOBP_ACTIVATION_OF_NF_KAPPAB_INDUCING_KINASE_ACTIVITY	0.242518	0.991976	0.883883	0.61967	0.831347	0.584968
GOBP_ACTIVATION_OF_PHOSPHOLIPASE_C_ACTIVITY	0.95951	1	0.891032	0.062459	0.178158	0.125359
GOBP_ACTIVATION_OF_PROTEIN_KINASE_A_ACTIVITY	1	1	1	0.884583	0.993928	0.699367
GOBP_ACTIVATION_OF_PROTEIN_KINASE_ACTIVITY	0.863742	1	0.891032	0.168513	0.356157	0.250606
GOBP_ACTIVATION_OF_PROTEIN_KINASE_B_ACTIVITY	0.660938	1	0.891032	0.197473	0.400452	0.281774
GOBP_ACTIVATION_OF_TRANSMEMBRANE_RECEPTOR_PROTEIN_TYROSINE_KINASE_ACTIVITY	1	1	1	0.441182	0.668447	0.470345
GOBP_ACTIVIN_RECEPTOR_SIGNALING_PATHWAY	0.815641	1	0.891032	0.585698	0.801273	0.563807
GOBP_ACTOMYOSIN_STRUCTURE_ORGANIZATION	0.956323	1	0.891032	0.00031866	0.00324284	0.00228179
GOBP_ACUTE_INFLAMMATORY_RESPONSE	0.999978	1	0.891032	0.00378956	0.0218005	0.0153397
GOBP_ACUTE_INFLAMMATORY_RESPONSE_TO_ANTIGENIC_STIMULUS	1	1	1	0.109986	0.26674	0.187688
GOBP_ACUTE_PHASE_RESPONSE	1	1	1	0.0692379	0.191691	0.134881
GOBP_ACYLGLYCEROL_HOMEOSTASIS	1	1	1	0.47754	0.705096	0.496133
GOBP_ADAPTATION_OF_SIGNALING_PATHWAY	1	1	1	1	1	1
GOBP_ADAPTIVE_IMMUNE_RESPONSE_BASED_ON_SOMATIC_RECOMBINATION_OF_IMMUNE_RECEPTORS_BUILT_FROM_IMMUNOGLOBULIN_SUPERFAMILY_DOMAINS	0.9999	1	0.891032	0.0241154	0.0879694	0.0618987
GOBP_ADAPTIVE_THERMOGENESIS	0.997411	1	0.891032	0.0124256	0.0534958	0.0376417
GOBP_ADENOHYPOPHYSIS_DEVELOPMENT	1	1	1	0.400195	0.625843	0.440367
GOBP_ADENYLATE_CYCLASE_ACTIVATING_ADRENERGIC_RECEPTOR_SIGNALING_PATHWAY	1	1	1	0.955825	1	0.703639
GOBP_ADENYLATE_CYCLASE_ACTIVATING_DOPAMINE_RECEPTOR_SIGNALING_PATHWAY	0.245616	0.991976	0.883883	0.698587	0.894668	0.629523
GOBP_ADENYLATE_CYCLASE_ACTIVATING_G_PROTEIN_COUPLED_RECEPTOR_SIGNALING_PATHWAY	0.999925	1	0.891032	0.260437	0.486582	0.342378
GOBP_ADENYLATE_CYCLASE_INHIBITING_G_PROTEIN_COUPLED_RECEPTOR_SIGNALING_PATHWAY	1	1	1	0.496467	0.721148	0.507428
GOBP_ADENYLATE_CYCLASE_MODULATING_G_PROTEIN_COUPLED_RECEPTOR_SIGNALING_PATHWAY	1	1	0.891032	0.29263	0.528689	0.372006
GOBP_ADHERENS_JUNCTION_ASSEMBLY	0.699351	1	0.891032	0.400195	0.625843	0.440367
GOBP_ADHERENS_JUNCTION_ORGANIZATION	0.957431	1	0.891032	0.014277	0.0599683	0.0421961
GOBP_ADHESION_OF_SYMBIONT_TO_HOST	1	1	1	0.00418303	0.0235403	0.0165639
GOBP_ADHESION_OF_SYMBIONT_TO_HOST_CELL	1	1	1	0.00104196	0.00819132	0.00576373
GOBP_ADIPOSE_TISSUE_DEVELOPMENT	0.977822	1	0.891032	0.635946	0.849267	0.597577
GOBP_ADRENAL_GLAND_DEVELOPMENT	1	1	1	0.0250999	0.090344	0.0635696
GOBP_ADRENERGIC_RECEPTOR_SIGNALING_PATHWAY	0.955239	1	0.891032	0.975768	1	0.703639
GOBP_ADULT_BEHAVIOR	0.999895	1	0.891032	0.569198	0.787002	0.553765
GOBP_ADULT_FEEDING_BEHAVIOR	1	1	1	1	1	1
GOBP_ADULT_HEART_DEVELOPMENT	0.728013	1	0.891032	0.789695	0.942866	0.663438
GOBP_ADULT_LOCOMOTORY_BEHAVIOR	0.998008	1	0.891032	0.560345	0.778926	0.548083
GOBP_AEROBIC_RESPIRATION	3.62e-06	8.68e-05	7.74e-05	0.997669	1	0.703639
GOBP_AGING	0.901868	1	0.891032	0.00049454	0.00464026	0.00326507
GOBP_ALANINE_TRANSPORT	1	1	1	0.0802841	0.213754	0.150406
GOBP_ALCOHOL_BIOSYNTHETIC_PROCESS	0.984873	1	0.891032	0.110382	0.267425	0.188171
GOBP_ALCOHOL_CATABOLIC_PROCESS	0.972587	1	0.891032	0.0180592	0.071713	0.0504601
GOBP_ALCOHOL_METABOLIC_PROCESS	0.999985	1	0.891032	6.7e-06	0.00013982	9.84e-05
GOBP_ALDEHYDE_BIOSYNTHETIC_PROCESS	1	1	1	0.518193	0.738578	0.519693
GOBP_ALDEHYDE_CATABOLIC_PROCESS	1	1	1	0.400195	0.625843	0.440367
GOBP_ALDITOL_METABOLIC_PROCESS	1	1	1	0.490326	0.714681	0.502878
GOBP_ALDITOL_PHOSPHATE_METABOLIC_PROCESS	1	1	1	0.35784	0.587853	0.413636
GOBP_ALDOSTERONE_METABOLIC_PROCESS	1	1	1	0.314433	0.541187	0.3808
GOBP_ALPHA_AMINO_ACID_BIOSYNTHETIC_PROCESS	0.990256	1	0.891032	0.130394	0.297624	0.20942
GOBP_ALPHA_AMINO_ACID_CATABOLIC_PROCESS	1	1	1	0.00024269	0.00265606	0.00186891
GOBP_ALPHA_AMINO_ACID_METABOLIC_PROCESS	1	1	0.891032	0.00854581	0.0403398	0.0283847
GOBP_ALPHA_BETA_T_CELL_ACTIVATION	0.998975	1	0.891032	0.00010695	0.00135311	0.0009521
GOBP_ALPHA_BETA_T_CELL_DIFFERENTIATION	0.979316	1	0.891032	0.00378956	0.0218005	0.0153397
GOBP_ALPHA_BETA_T_CELL_PROLIFERATION	1	1	1	0.00195177	0.0131076	0.00922299
GOBP_ALPHA_LINOLENIC_ACID_METABOLIC_PROCESS	1	1	1	0.441182	0.668447	0.470345
GOBP_ALTERNATIVE_MRNA_SPLICING_VIA_SPLICEOSOME	0.154026	0.742518	0.661607	0.846917	0.976841	0.687343
GOBP_AMEBOIDAL_TYPE_CELL_MIGRATION	1	1	0.891032	2.24e-12	4.02e-10	2.83e-10
GOBP_AMELOGENESIS	0.900163	1	0.891032	0.490326	0.714681	0.502878
GOBP_AMINE_BIOSYNTHETIC_PROCESS	0.979939	1	0.891032	0.83268	0.965945	0.679677
GOBP_AMINE_CATABOLIC_PROCESS	0.95951	1	0.891032	0.00735984	0.0360555	0.02537
GOBP_AMINE_METABOLIC_PROCESS	0.00014195	0.00219937	0.00195971	0.00880991	0.041332	0.0290828
GOBP_AMINE_TRANSPORT	0.99522	1	0.891032	0.372472	0.60107	0.422936
GOBP_AMINO_ACID_ACTIVATION	0.322828	1	0.891032	1	1	1
GOBP_AMINO_ACID_BETAINE_METABOLIC_PROCESS	0.81783	1	0.891032	0.300204	0.535512	0.376807
GOBP_AMINO_ACID_IMPORT	0.950664	1	0.891032	0.0394058	0.123415	0.0868395
GOBP_AMINO_ACID_TRANSMEMBRANE_TRANSPORT	0.995939	1	0.891032	0.401078	0.627013	0.441191
GOBP_AMINO_ACID_TRANSPORT	0.999184	1	0.891032	0.0889828	0.232264	0.16343
GOBP_AMINO_SUGAR_BIOSYNTHETIC_PROCESS	1	1	1	0.174769	0.362791	0.255274
GOBP_AMINO_SUGAR_CATABOLIC_PROCESS	1	1	1	0.0108109	0.0482861	0.033976
GOBP_AMINO_SUGAR_METABOLIC_PROCESS	0.983587	1	0.891032	0.00143495	0.0104348	0.00734233
GOBP_AMINOACYL_TRNA_METABOLISM_INVOLVED_IN_TRANSLATIONAL_FIDELITY	0.728013	1	0.891032	1	1	1
GOBP_AMINOGLYCAN_BIOSYNTHETIC_PROCESS	0.996048	1	0.891032	0.0008114	0.00675541	0.00475337
GOBP_AMINOGLYCAN_CATABOLIC_PROCESS	0.99891	1	0.891032	1.72e-07	6.73e-06	4.74e-06
GOBP_AMINOGLYCAN_METABOLIC_PROCESS	0.999338	1	0.891032	0.00017951	0.00207868	0.00146264
GOBP_AMINOGLYCOSIDE_ANTIBIOTIC_METABOLIC_PROCESS	1	1	1	0.00282969	0.0170588	0.0120032
GOBP_AMMONIUM_ION_METABOLIC_PROCESS	1	1	1	0.0178449	0.0709829	0.0499464
GOBP_AMMONIUM_TRANSPORT	1	1	1	0.314433	0.541187	0.3808
GOBP_AMP_METABOLIC_PROCESS	1	1	1	0.853273	0.976915	0.687396
GOBP_AMYLOID_BETA_CLEARANCE	0.715309	1	0.891032	0.023071	0.0845454	0.0594894
GOBP_AMYLOID_BETA_METABOLIC_PROCESS	0.458071	1	0.891032	0.490702	0.715006	0.503106
GOBP_AMYLOID_FIBRIL_FORMATION	0.430509	1	0.891032	0.310809	0.541187	0.3808
GOBP_AMYLOID_PRECURSOR_PROTEIN_BIOSYNTHETIC_PROCESS	0.760924	1	0.891032	0.627433	0.839342	0.590594
GOBP_AMYLOID_PRECURSOR_PROTEIN_CATABOLIC_PROCESS	0.458071	1	0.891032	0.783017	0.942866	0.663438
GOBP_AMYLOID_PRECURSOR_PROTEIN_METABOLIC_PROCESS	0.683095	1	0.891032	0.628798	0.840927	0.591709
GOBP_ANAPHASE_PROMOTING_COMPLEX_DEPENDENT_CATABOLIC_PROCESS	1.39e-21	2.61e-19	2.33e-19	0.734353	0.913818	0.642998
GOBP_ANATOMICAL_STRUCTURE_ARRANGEMENT	1	1	1	0.518193	0.738578	0.519693
GOBP_ANATOMICAL_STRUCTURE_HOMEOSTASIS	0.0209495	0.167108	0.148898	0.0567453	0.165058	0.116141
GOBP_ANATOMICAL_STRUCTURE_MATURATION	0.999979	1	0.891032	0.00401556	0.022987	0.0161745
GOBP_ANATOMICAL_STRUCTURE_REGRESSION	0.81783	1	0.891032	0.300204	0.535512	0.376807
GOBP_ANDROGEN_BIOSYNTHETIC_PROCESS	1	1	1	0.35784	0.587853	0.413636
GOBP_ANDROGEN_METABOLIC_PROCESS	1	1	1	0.0459922	0.140821	0.0990871
GOBP_ANDROGEN_RECEPTOR_SIGNALING_PATHWAY	0.981854	1	0.891032	0.159362	0.341386	0.240212
GOBP_ANGIOGENESIS_INVOLVED_IN_WOUND_HEALING	0.945296	1	0.891032	0.00087413	0.00712305	0.00501206
GOBP_ANGIOTENSIN_ACTIVATED_SIGNALING_PATHWAY	1	1	1	0.480568	0.705096	0.496133
GOBP_ANIMAL_ORGAN_FORMATION	0.983595	1	0.891032	0.0026884	0.0165611	0.011653
GOBP_ANIMAL_ORGAN_MATURATION	0.926096	1	0.891032	0.0220987	0.0823439	0.0579404
GOBP_ANIMAL_ORGAN_REGENERATION	0.926435	1	0.891032	0.00270614	0.0166372	0.0117066
GOBP_ANION_HOMEOSTASIS	0.96687	1	0.891032	0.0324829	0.108137	0.0760894
GOBP_ANOIKIS	0.641222	1	0.891032	0.0820916	0.216953	0.152657
GOBP_ANTERIOR_POSTERIOR_AXIS_SPECIFICATION	0.698943	1	0.891032	0.819464	0.956075	0.672732
GOBP_ANTERIOR_POSTERIOR_PATTERN_SPECIFICATION	0.925354	1	0.891032	0.109692	0.26674	0.187688
GOBP_ANTEROGRADE_AXONAL_TRANSPORT	0.0741969	0.443415	0.395097	0.441514	0.668447	0.470345
GOBP_ANTIBACTERIAL_HUMORAL_RESPONSE	1	1	1	0.0780901	0.212037	0.149198
GOBP_ANTIGEN_PROCESSING_AND_PRESENTATION	4.34e-05	0.00075	0.00066828	0.0218421	0.0817804	0.0575439
GOBP_ANTIGEN_PROCESSING_AND_PRESENTATION_OF_ENDOGENOUS_ANTIGEN	1	1	1	0.809293	0.951613	0.669592
GOBP_ANTIGEN_PROCESSING_AND_PRESENTATION_OF_ENDOGENOUS_PEPTIDE_ANTIGEN	1	1	1	0.897637	0.999426	0.703235
GOBP_ANTIGEN_PROCESSING_AND_PRESENTATION_OF_EXOGENOUS_PEPTIDE_ANTIGEN_VIA_MHC_CLASS_I	4.43e-10	1.96e-08	1.75e-08	0.291126	0.527122	0.370903
GOBP_ANTIGEN_PROCESSING_AND_PRESENTATION_OF_PEPTIDE_ANTIGEN	3.06e-07	8.53e-06	7.6e-06	0.43618	0.668447	0.470345
GOBP_ANTIGEN_PROCESSING_AND_PRESENTATION_OF_PEPTIDE_ANTIGEN_VIA_MHC_CLASS_I	2.29e-08	7.97e-07	7.1e-07	0.325757	0.557176	0.392051
GOBP_ANTIGEN_PROCESSING_AND_PRESENTATION_OF_PEPTIDE_OR_POLYSACCHARIDE_ANTIGEN_VIA_MHC_CLASS_II	0.117205	0.623273	0.555356	0.638214	0.85205	0.599536
GOBP_ANTIGEN_PROCESSING_AND_PRESENTATION_VIA_MHC_CLASS_IB	1	1	1	0.813473	0.951613	0.669592
GOBP_ANTIGEN_RECEPTOR_MEDIATED_SIGNALING_PATHWAY	0.0108354	0.0944336	0.0841434	0.0004177	0.00399991	0.0028145
GOBP_ANTIMICROBIAL_HUMORAL_IMMUNE_RESPONSE_MEDIATED_BY_ANTIMICROBIAL_PEPTIDE	0.98291	1	0.891032	0.00010826	0.0013654	0.00096075
GOBP_ANTIMICROBIAL_HUMORAL_RESPONSE	0.999919	1	0.891032	5.9e-06	0.00012589	8.86e-05
GOBP_ANTIVIRAL_INNATE_IMMUNE_RESPONSE	0.632654	1	0.891032	1	1	1
GOBP_AORTA_DEVELOPMENT	0.611236	1	0.891032	0.00026613	0.00281492	0.00198069
GOBP_AORTA_MORPHOGENESIS	0.963375	1	0.891032	0.00264989	0.0164874	0.0116012
GOBP_AORTIC_VALVE_MORPHOGENESIS	1	1	1	0.0003661	0.00364066	0.00256171
GOBP_APICAL_JUNCTION_ASSEMBLY	0.998353	1	0.891032	0.109649	0.26674	0.187688
GOBP_APICAL_PROTEIN_LOCALIZATION	1	1	1	0.518193	0.738578	0.519693
GOBP_APOPTOTIC_CELL_CLEARANCE	0.72875	1	0.891032	0.00996143	0.0454961	0.0320128
GOBP_APOPTOTIC_DNA_FRAGMENTATION	1	1	1	1	1	1
GOBP_APOPTOTIC_MITOCHONDRIAL_CHANGES	0.697612	1	0.891032	0.582018	0.800446	0.563225
GOBP_APOPTOTIC_PROCESS_INVOLVED_IN_DEVELOPMENT	1	1	1	0.00531252	0.0279688	0.01968
GOBP_APOPTOTIC_PROCESS_INVOLVED_IN_MORPHOGENESIS	1	1	1	0.0026902	0.0165611	0.011653
GOBP_APPENDAGE_DEVELOPMENT	0.881918	1	0.891032	4.19e-05	0.00063263	0.00044514
GOBP_APPENDAGE_MORPHOGENESIS	0.901529	1	0.891032	7.26e-05	0.00099692	0.00070147
GOBP_ARACHIDONIC_ACID_METABOLIC_PROCESS	1	1	1	1.5e-05	0.00026589	0.00018709
GOBP_ARACHIDONIC_ACID_SECRETION	1	1	1	0.101581	0.250666	0.176378
GOBP_ARF_PROTEIN_SIGNAL_TRANSDUCTION	1	1	1	0.649617	0.860608	0.605558
GOBP_ARGININE_CATABOLIC_PROCESS	1	1	1	0.732662	0.911992	0.641713
GOBP_ARGININE_METABOLIC_PROCESS	0.865136	1	0.891032	0.677656	0.886399	0.623705
GOBP_ARGININE_TRANSPORT	0.319186	1	0.891032	0.762886	0.928713	0.653479
GOBP_AROMATIC_AMINO_ACID_FAMILY_CATABOLIC_PROCESS	1	1	1	0.00475873	0.0256629	0.0180574
GOBP_AROMATIC_AMINO_ACID_FAMILY_METABOLIC_PROCESS	1	1	1	0.062459	0.178158	0.125359
GOBP_AROMATIC_AMINO_ACID_TRANSPORT	1	1	1	0.0503847	0.149958	0.105517
GOBP_ARP2_3_COMPLEX_MEDIATED_ACTIN_NUCLEATION	0.162367	0.774794	0.690366	0.94458	1	0.703639
GOBP_ARTERY_DEVELOPMENT	0.95499	1	0.891032	3.97e-06	9.3e-05	6.54e-05
GOBP_ARTERY_MORPHOGENESIS	0.999108	1	0.891032	1.86e-05	0.00031568	0.00022212
GOBP_ASPARTATE_FAMILY_AMINO_ACID_BIOSYNTHETIC_PROCESS	0.877999	1	0.891032	0.703835	0.897192	0.631299
GOBP_ASPARTATE_FAMILY_AMINO_ACID_CATABOLIC_PROCESS	1	1	1	0.011121	0.0491987	0.0346181
GOBP_ASPARTATE_FAMILY_AMINO_ACID_METABOLIC_PROCESS	0.99335	1	0.891032	0.0504265	0.149958	0.105517
GOBP_ASSOCIATIVE_LEARNING	0.319861	1	0.891032	0.360304	0.590887	0.415771
GOBP_ASTRAL_MICROTUBULE_ORGANIZATION	0.632654	1	0.891032	1	1	1
GOBP_ASTROCYTE_ACTIVATION	0.918302	1	0.891032	0.548268	0.767641	0.540142
GOBP_ASTROCYTE_DEVELOPMENT	0.776968	1	0.891032	0.0951144	0.23889	0.168092
GOBP_ASTROCYTE_DIFFERENTIATION	0.972883	1	0.891032	0.108311	0.265026	0.186483
GOBP_ASYMMETRIC_CELL_DIVISION	0.81783	1	0.891032	0.587784	0.801273	0.563807
GOBP_ATF6_MEDIATED_UNFOLDED_PROTEIN_RESPONSE	0.245616	0.991976	0.883883	0.698587	0.894668	0.629523
GOBP_ATP_BIOSYNTHETIC_PROCESS	2.37e-06	5.95e-05	5.3e-05	0.9988	1	0.703639
GOBP_ATP_DEPENDENT_CHROMATIN_REMODELING	0.00061306	0.00785088	0.00699539	0.999977	1	0.703639
GOBP_ATP_METABOLIC_PROCESS	2.13e-18	3.34e-16	2.97e-16	0.995895	1	0.703639
GOBP_ATP_SYNTHESIS_COUPLED_ELECTRON_TRANSPORT	2.64e-21	4.72e-19	4.21e-19	0.997393	1	0.703639
GOBP_ATP_SYNTHESIS_COUPLED_PROTON_TRANSPORT	2.84e-07	7.98e-06	7.11e-06	1	1	1
GOBP_ATP_TRANSPORT	0.81783	1	0.891032	0.869866	0.985721	0.693592
GOBP_ATRIAL_CARDIAC_MUSCLE_CELL_MEMBRANE_REPOLARIZATION	1	1	1	0.35784	0.587853	0.413636
GOBP_ATRIAL_CARDIAC_MUSCLE_CELL_TO_AV_NODE_CELL_SIGNALING	1	1	1	0.159763	0.341386	0.240212
GOBP_ATRIAL_SEPTUM_DEVELOPMENT	0.633629	1	0.891032	0.728217	0.911992	0.641713
GOBP_ATRIAL_SEPTUM_MORPHOGENESIS	1	1	1	0.834565	0.965945	0.679677
GOBP_ATRIOVENTRICULAR_VALVE_DEVELOPMENT	0.918302	1	0.891032	0.144476	0.318402	0.22404
GOBP_ATTACHMENT_OF_MITOTIC_SPINDLE_MICROTUBULES_TO_KINETOCHORE	0.0103756	0.0914852	0.0815163	0.834565	0.965945	0.679677
GOBP_ATTACHMENT_OF_SPINDLE_MICROTUBULES_TO_KINETOCHORE	0.0151903	0.12625	0.112493	0.918054	1	0.703639
GOBP_AUDITORY_RECEPTOR_CELL_DEVELOPMENT	1	1	1	0.36512	0.59217	0.416674
GOBP_AUDITORY_RECEPTOR_CELL_MORPHOGENESIS	1	1	1	0.267886	0.49345	0.347211
GOBP_AUTONOMIC_NERVOUS_SYSTEM_DEVELOPMENT	1	1	1	0.0301632	0.102392	0.0720472
GOBP_AUTOPHAGIC_CELL_DEATH	1	1	1	0.35784	0.587853	0.413636
GOBP_AUTOPHAGOSOME_MATURATION	0.00030766	0.00430615	0.00383692	0.992712	1	0.703639
GOBP_AUTOPHAGOSOME_ORGANIZATION	0.00542064	0.0521962	0.0465085	0.940353	1	0.703639
GOBP_AUTOPHAGY_OF_MITOCHONDRION	0.097855	0.549577	0.489691	0.936315	1	0.703639
GOBP_AUTOPHAGY_OF_NUCLEUS	0.753944	1	0.891032	0.813473	0.951613	0.669592
GOBP_AV_NODE_CELL_TO_BUNDLE_OF_HIS_CELL_COMMUNICATION	1	1	1	0.762886	0.928713	0.653479
GOBP_AXIS_ELONGATION	0.933147	1	0.891032	0.0080803	0.0390506	0.0274775
GOBP_AXIS_SPECIFICATION	0.805274	1	0.891032	0.832973	0.965945	0.679677
GOBP_AXO_DENDRITIC_PROTEIN_TRANSPORT	1	1	1	0.174769	0.362791	0.255274
GOBP_AXO_DENDRITIC_TRANSPORT	0.0287371	0.214508	0.191133	0.376999	0.607953	0.427779
GOBP_AXON_ENSHEATHMENT_IN_CENTRAL_NERVOUS_SYSTEM	1	1	1	0.428951	0.662356	0.466059
GOBP_AXON_EXTENSION	0.769439	1	0.891032	0.00013612	0.00164549	0.00115783
GOBP_AXONAL_FASCICULATION	1	1	1	0.0152679	0.0628626	0.0442326
GOBP_AXONAL_TRANSPORT_OF_MITOCHONDRION	0.753944	1	0.891032	0.480568	0.705096	0.496133
GOBP_AXONEMAL_DYNEIN_COMPLEX_ASSEMBLY	1	1	1	0.569133	0.787002	0.553765
GOBP_AXONEME_ASSEMBLY	0.93953	1	0.891032	0.872603	0.98786	0.695097
GOBP_AZOLE_TRANSMEMBRANE_TRANSPORT	1	1	1	0.146065	0.318402	0.22404
GOBP_B_CELL_ACTIVATION	0.995905	1	0.891032	0.0005308	0.00492101	0.00346261
GOBP_B_CELL_ACTIVATION_INVOLVED_IN_IMMUNE_RESPONSE	0.636347	1	0.891032	0.0298201	0.10145	0.0713839
GOBP_B_CELL_APOPTOTIC_PROCESS	0.70291	1	0.891032	0.310809	0.541187	0.3808
GOBP_B_CELL_DIFFERENTIATION	0.980052	1	0.891032	0.00546131	0.0287197	0.0202083
GOBP_B_CELL_HOMEOSTASIS	0.760924	1	0.891032	0.0886167	0.231438	0.162849
GOBP_B_CELL_MEDIATED_IMMUNITY	0.999751	1	0.891032	0.981423	1	0.703639
GOBP_B_CELL_PROLIFERATION	0.995939	1	0.891032	1.54e-05	0.00027205	0.00019143
GOBP_B_CELL_RECEPTOR_SIGNALING_PATHWAY	0.999958	1	0.891032	0.0148974	0.0622989	0.0438359
GOBP_BARBED_END_ACTIN_FILAMENT_CAPPING	0.723447	1	0.891032	0.0655895	0.183666	0.129235
GOBP_BASE_CONVERSION_OR_SUBSTITUTION_EDITING	1	1	1	0.182956	0.374111	0.26324
GOBP_BASE_EXCISION_REPAIR	0.516696	1	0.891032	0.990732	1	0.703639
GOBP_BASE_EXCISION_REPAIR_AP_SITE_FORMATION	0.632654	1	0.891032	1	1	1
GOBP_BASEMENT_MEMBRANE_ASSEMBLY	1	1	1	0.00065701	0.00567058	0.00399004
GOBP_BASEMENT_MEMBRANE_ORGANIZATION	1	1	1	8.78e-06	0.00017025	0.0001198
GOBP_BASIC_AMINO_ACID_TRANSMEMBRANE_TRANSPORT	0.753944	1	0.891032	0.813473	0.951613	0.669592
GOBP_BASIC_AMINO_ACID_TRANSPORT	0.52251	1	0.891032	0.61967	0.831347	0.584968
GOBP_BEHAVIORAL_RESPONSE_TO_COCAINE	1	1	1	0.119101	0.277425	0.195207
GOBP_BEHAVIORAL_RESPONSE_TO_PAIN	1	1	1	0.146065	0.318402	0.22404
GOBP_BENZENE_CONTAINING_COMPOUND_METABOLIC_PROCESS	1	1	1	0.0178449	0.0709829	0.0499464
GOBP_BETA_CATENIN_DESTRUCTION_COMPLEX_DISASSEMBLY	0.0114683	0.0988061	0.0880394	0.919484	1	0.703639
GOBP_BETA_CATENIN_TCF_COMPLEX_ASSEMBLY	0.341567	1	0.891032	0.696481	0.894668	0.629523
GOBP_BICARBONATE_TRANSPORT	1	1	1	0.0479745	0.145077	0.102082
GOBP_BILE_ACID_AND_BILE_SALT_TRANSPORT	1	1	1	0.736842	0.915446	0.644144
GOBP_BILE_ACID_BIOSYNTHETIC_PROCESS	1	1	1	0.1307	0.297883	0.209602
GOBP_BILE_ACID_METABOLIC_PROCESS	0.99335	1	0.891032	0.105485	0.258928	0.182192
GOBP_BILE_ACID_SECRETION	1	1	1	0.762886	0.928713	0.653479
GOBP_BILE_ACID_SIGNALING_PATHWAY	1	1	1	1	1	1
GOBP_BINDING_OF_SPERM_TO_ZONA_PELLUCIDA	0.238433	0.991976	0.883883	0.887982	0.995933	0.700777
GOBP_BIOLOGICAL_PROCESS_INVOLVED_IN_INTERACTION_WITH_HOST	0.896665	1	0.891032	0.0134525	0.0575969	0.0405275
GOBP_BIOLOGICAL_PROCESS_INVOLVED_IN_INTERACTION_WITH_SYMBIONT	0.258726	1	0.891032	0.600903	0.814879	0.573381
GOBP_BIOLOGICAL_PROCESS_INVOLVED_IN_INTRASPECIES_INTERACTION_BETWEEN_ORGANISMS	0.884238	1	0.891032	0.943123	1	0.703639
GOBP_BIOMINERALIZATION	0.999998	1	0.891032	7.21e-06	0.00014713	0.00010353
GOBP_BLASTOCYST_DEVELOPMENT	0.00572621	0.0547187	0.0487562	0.994574	1	0.703639
GOBP_BLASTOCYST_FORMATION	0.0151903	0.12625	0.112493	0.985013	1	0.703639
GOBP_BLASTOCYST_GROWTH	0.0291871	0.214628	0.19124	1	1	1
GOBP_BLASTODERM_SEGMENTATION	0.850918	1	0.891032	0.36512	0.59217	0.416674
GOBP_BLEB_ASSEMBLY	1	1	1	0.0942319	0.238198	0.167605
GOBP_BLOOD_COAGULATION_INTRINSIC_PATHWAY	1	1	1	0.884583	0.993928	0.699367
GOBP_BLOOD_VESSEL_ENDOTHELIAL_CELL_DIFFERENTIATION	1	1	1	0.732662	0.911992	0.641713
GOBP_BLOOD_VESSEL_ENDOTHELIAL_CELL_MIGRATION	0.998285	1	0.891032	0.0577932	0.167687	0.117991
GOBP_BLOOD_VESSEL_ENDOTHELIAL_CELL_PROLIFERATION_INVOLVED_IN_SPROUTING_ANGIOGENESIS	0.99555	1	0.891032	0.410774	0.638951	0.449591
GOBP_BLOOD_VESSEL_REMODELING	0.989014	1	0.891032	0.0261685	0.0936112	0.0658685
GOBP_BODY_FLUID_SECRETION	0.998198	1	0.891032	0.0574439	0.166777	0.117351
GOBP_BODY_MORPHOGENESIS	0.8272	1	0.891032	0.00038033	0.00372646	0.00262208
GOBP_BONE_CELL_DEVELOPMENT	0.95951	1	0.891032	0.145922	0.318402	0.22404
GOBP_BONE_DEVELOPMENT	0.979303	1	0.891032	7.51e-08	3.39e-06	2.39e-06
GOBP_BONE_GROWTH	1	1	1	0.163259	0.346236	0.243625
GOBP_BONE_MATURATION	0.889635	1	0.891032	0.0313042	0.105267	0.07407
GOBP_BONE_MINERALIZATION	0.999987	1	0.891032	1.47e-06	4.16e-05	2.93e-05
GOBP_BONE_MINERALIZATION_INVOLVED_IN_BONE_MATURATION	1	1	1	0.0279142	0.0954538	0.067165
GOBP_BONE_MORPHOGENESIS	0.976795	1	0.891032	0.00012404	0.00152985	0.00107646
GOBP_BONE_REMODELING	0.975099	1	0.891032	3.5e-05	0.00054226	0.00038156
GOBP_BONE_RESORPTION	0.942888	1	0.891032	0.00821907	0.0395653	0.0278397
GOBP_BONE_TRABECULA_MORPHOGENESIS	1	1	1	0.00732624	0.0360426	0.025361
GOBP_BRAIN_MORPHOGENESIS	0.430923	1	0.891032	0.772828	0.936407	0.658893
GOBP_BRANCH_ELONGATION_OF_AN_EPITHELIUM	1	1	1	0.00848257	0.0402015	0.0282873
GOBP_BRANCHED_CHAIN_AMINO_ACID_METABOLIC_PROCESS	0.900163	1	0.891032	0.750873	0.927186	0.652404
GOBP_BRANCHING_INVOLVED_IN_BLOOD_VESSEL_MORPHOGENESIS	0.848016	1	0.891032	0.00337971	0.0199609	0.0140453
GOBP_BRANCHING_INVOLVED_IN_LABYRINTHINE_LAYER_MORPHOGENESIS	1	1	1	0.762886	0.928713	0.653479
GOBP_BRANCHING_INVOLVED_IN_MAMMARY_GLAND_DUCT_MORPHOGENESIS	0.580774	1	0.891032	0.0197719	0.075673	0.0532465
GOBP_BRANCHING_INVOLVED_IN_PROSTATE_GLAND_MORPHOGENESIS	0.319186	1	0.891032	0.146065	0.318402	0.22404
GOBP_BRANCHING_INVOLVED_IN_SALIVARY_GLAND_MORPHOGENESIS	0.865136	1	0.891032	0.00475873	0.0256629	0.0180574
GOBP_BRANCHING_MORPHOGENESIS_OF_A_NERVE	1	1	1	0.314433	0.541187	0.3808
GOBP_BRANCHING_MORPHOGENESIS_OF_AN_EPITHELIAL_TUBE	0.968205	1	0.891032	1.06e-07	4.48e-06	3.16e-06
GOBP_BROWN_FAT_CELL_DIFFERENTIATION	0.941798	1	0.891032	0.14201	0.31825	0.223933
GOBP_BUNDLE_OF_HIS_CELL_TO_PURKINJE_MYOCYTE_COMMUNICATION	1	1	1	0.204863	0.407101	0.286452
GOBP_C_TERMINAL_PROTEIN_AMINO_ACID_MODIFICATION	0.753944	1	0.891032	0.813473	0.951613	0.669592
GOBP_C21_STEROID_HORMONE_BIOSYNTHETIC_PROCESS	1	1	1	0.575742	0.793456	0.558307
GOBP_C21_STEROID_HORMONE_METABOLIC_PROCESS	1	1	1	0.0315512	0.105716	0.0743859
GOBP_C4_DICARBOXYLATE_TRANSPORT	1	1	1	0.519773	0.738578	0.519693
GOBP_CALCINEURIN_MEDIATED_SIGNALING	0.8272	1	0.891032	0.0301632	0.102392	0.0720472
GOBP_CALCIUM_DEPENDENT_CELL_CELL_ADHESION_VIA_PLASMA_MEMBRANE_CELL_ADHESION_MOLECULES	0.986572	1	0.891032	0.00017217	0.00201828	0.00142014
GOBP_CALCIUM_IMPORT_INTO_THE_MITOCHONDRION	0.728013	1	0.891032	0.789695	0.942866	0.663438
GOBP_CALCIUM_INDEPENDENT_CELL_CELL_ADHESION_VIA_PLASMA_MEMBRANE_CELL_ADHESION_MOLECULES	0.900163	1	0.891032	0.00054779	0.00502845	0.00353821
GOBP_CALCIUM_ION_EXPORT	1	1	1	1	1	1
GOBP_CALCIUM_ION_IMPORT	0.999759	1	0.891032	0.139821	0.31421	0.22109
GOBP_CALCIUM_ION_IMPORT_INTO_CYTOSOL	1	1	1	0.0250999	0.090344	0.0635696
GOBP_CALCIUM_ION_REGULATED_EXOCYTOSIS	0.998198	1	0.891032	0.577913	0.795742	0.559915
GOBP_CALCIUM_ION_REGULATED_EXOCYTOSIS_OF_NEUROTRANSMITTER	1	1	1	0.300204	0.535512	0.376807
GOBP_CALCIUM_ION_TRANSMEMBRANE_TRANSPORT	0.999938	1	0.891032	0.00662205	0.0334626	0.0235456
GOBP_CALCIUM_ION_TRANSMEMBRANE_TRANSPORT_VIA_HIGH_VOLTAGE_GATED_CALCIUM_CHANNEL	1	1	1	0.300204	0.535512	0.376807
GOBP_CALCIUM_ION_TRANSPORT	1	1	0.891032	1.48e-05	0.00026229	0.00018456
GOBP_CALCIUM_ION_TRANSPORT_INTO_CYTOSOL	0.999996	1	0.891032	0.00035799	0.00359841	0.00253199
GOBP_CALCIUM_MEDIATED_SIGNALING	0.999979	1	0.891032	5.28e-07	1.81e-05	1.27e-05
GOBP_CALCIUM_MEDIATED_SIGNALING_USING_INTRACELLULAR_CALCIUM_SOURCE	1	1	1	0.232213	0.449879	0.316552
GOBP_CAMERA_TYPE_EYE_DEVELOPMENT	0.993659	1	0.891032	0.00025401	0.00271786	0.00191239
GOBP_CAMERA_TYPE_EYE_MORPHOGENESIS	0.930202	1	0.891032	6.15e-05	0.00086949	0.00061181
GOBP_CAMERA_TYPE_EYE_PHOTORECEPTOR_CELL_DIFFERENTIATION	0.70291	1	0.891032	0.00483136	0.0258192	0.0181674
GOBP_CAMP_BIOSYNTHETIC_PROCESS	1	1	1	1	1	1
GOBP_CAMP_MEDIATED_SIGNALING	0.942888	1	0.891032	0.263149	0.490271	0.344974
GOBP_CAMP_METABOLIC_PROCESS	1	1	1	0.928592	1	0.703639
GOBP_CANONICAL_WNT_SIGNALING_PATHWAY	7.17e-05	0.00118794	0.0010585	0.00089623	0.00719151	0.00506023
GOBP_CARBOHYDRATE_BIOSYNTHETIC_PROCESS	0.941771	1	0.891032	0.2576	0.483178	0.339983
GOBP_CARBOHYDRATE_CATABOLIC_PROCESS	0.0848248	0.492088	0.438466	0.800371	0.951207	0.669307
GOBP_CARBOHYDRATE_DERIVATIVE_CATABOLIC_PROCESS	0.996935	1	0.891032	3.3e-10	2.9e-08	2.04e-08
GOBP_CARBOHYDRATE_DERIVATIVE_TRANSPORT	0.675325	1	0.891032	0.449494	0.678323	0.477294
GOBP_CARBOHYDRATE_HOMEOSTASIS	0.977192	1	0.891032	0.12533	0.290625	0.204495
GOBP_CARBOHYDRATE_PHOSPHORYLATION	0.909686	1	0.891032	0.0465032	0.141733	0.0997287
GOBP_CARBOHYDRATE_TRANSMEMBRANE_TRANSPORT	0.99661	1	0.891032	0.0616229	0.176814	0.124413
GOBP_CARBOHYDRATE_TRANSPORT	0.998975	1	0.891032	0.07486	0.205909	0.144886
GOBP_CARBOXYLIC_ACID_TRANSPORT	1	1	0.891032	0.0002964	0.0030769	0.00216503
GOBP_CARDIAC_ATRIUM_DEVELOPMENT	0.859354	1	0.891032	0.197473	0.400452	0.281774
GOBP_CARDIAC_ATRIUM_MORPHOGENESIS	1	1	1	0.101581	0.250666	0.176378
GOBP_CARDIAC_CELL_DEVELOPMENT	0.988452	1	0.891032	0.224134	0.43882	0.308771
GOBP_CARDIAC_CELL_FATE_COMMITMENT	1	1	1	0.789695	0.942866	0.663438
GOBP_CARDIAC_CHAMBER_DEVELOPMENT	0.919267	1	0.891032	0.00563324	0.029557	0.0207975
GOBP_CARDIAC_CHAMBER_FORMATION	1	1	1	0.762886	0.928713	0.653479
GOBP_CARDIAC_CHAMBER_MORPHOGENESIS	0.999165	1	0.891032	0.00208758	0.0136647	0.00961502
GOBP_CARDIAC_CONDUCTION	0.999995	1	0.891032	0.323032	0.553124	0.389199
GOBP_CARDIAC_CONDUCTION_SYSTEM_DEVELOPMENT	0.728013	1	0.891032	1	1	1
GOBP_CARDIAC_EPITHELIAL_TO_MESENCHYMAL_TRANSITION	1	1	1	0.0191094	0.0752815	0.052971
GOBP_CARDIAC_LEFT_VENTRICLE_MORPHOGENESIS	0.753944	1	0.891032	0.480568	0.705096	0.496133
GOBP_CARDIAC_MUSCLE_CELL_ACTION_POTENTIAL	0.999512	1	0.891032	0.236056	0.449879	0.316552
GOBP_CARDIAC_MUSCLE_CELL_ACTION_POTENTIAL_INVOLVED_IN_CONTRACTION	1	1	1	0.410774	0.638951	0.449591
GOBP_CARDIAC_MUSCLE_CELL_CONTRACTION	1	1	1	0.293117	0.529362	0.37248
GOBP_CARDIAC_MUSCLE_CELL_DIFFERENTIATION	0.966316	1	0.891032	0.529881	0.748653	0.526782
GOBP_CARDIAC_MUSCLE_CELL_MEMBRANE_REPOLARIZATION	1	1	1	0.804677	0.951613	0.669592
GOBP_CARDIAC_MUSCLE_CELL_MYOBLAST_DIFFERENTIATION	0.66767	1	0.891032	0.732662	0.911992	0.641713
GOBP_CARDIAC_MUSCLE_CELL_PROLIFERATION	0.997022	1	0.891032	0.113826	0.274765	0.193335
GOBP_CARDIAC_MUSCLE_CONTRACTION	0.99985	1	0.891032	0.0162377	0.0657704	0.0462786
GOBP_CARDIAC_MUSCLE_TISSUE_DEVELOPMENT	0.991194	1	0.891032	0.0103843	0.047051	0.033107
GOBP_CARDIAC_MUSCLE_TISSUE_MORPHOGENESIS	0.996708	1	0.891032	0.0097885	0.0450994	0.0317337
GOBP_CARDIAC_MYOFIBRIL_ASSEMBLY	0.4914	1	0.891032	0.0354722	0.115689	0.0814031
GOBP_CARDIAC_NEURAL_CREST_CELL_DIFFERENTIATION_INVOLVED_IN_HEART_DEVELOPMENT	1	1	1	0.00470779	0.0256629	0.0180574
GOBP_CARDIAC_RIGHT_VENTRICLE_MORPHOGENESIS	1	1	1	0.182956	0.374111	0.26324
GOBP_CARDIAC_SEPTUM_DEVELOPMENT	0.820437	1	0.891032	0.0209017	0.078512	0.0552441
GOBP_CARDIAC_SEPTUM_MORPHOGENESIS	1	1	1	0.0109236	0.0486027	0.0341988
GOBP_CARDIAC_VASCULAR_SMOOTH_MUSCLE_CELL_DIFFERENTIATION	0.632654	1	0.891032	1	1	1
GOBP_CARDIAC_VENTRICLE_DEVELOPMENT	0.966316	1	0.891032	0.030131	0.102392	0.0720472
GOBP_CARDIAC_VENTRICLE_MORPHOGENESIS	0.991821	1	0.891032	0.0435624	0.135702	0.0954856
GOBP_CARDIOBLAST_DIFFERENTIATION	0.850918	1	0.891032	0.649617	0.860608	0.605558
GOBP_CARDIOCYTE_DIFFERENTIATION	0.995172	1	0.891032	0.133029	0.302894	0.213128
GOBP_CARDIOLIPIN_METABOLIC_PROCESS	0.242518	0.991976	0.883883	0.332696	0.56613	0.398351
GOBP_CARNITINE_METABOLIC_PROCESS	0.728013	1	0.891032	0.789695	0.942866	0.663438
GOBP_CARNITINE_SHUTTLE	0.66767	1	0.891032	0.732662	0.911992	0.641713
GOBP_CARTILAGE_DEVELOPMENT	0.993225	1	0.891032	1.94e-11	2.38e-09	1.68e-09
GOBP_CARTILAGE_DEVELOPMENT_INVOLVED_IN_ENDOCHONDRAL_BONE_MORPHOGENESIS	1	1	1	0.00152988	0.0109371	0.00769577
GOBP_CARTILAGE_MORPHOGENESIS	0.632654	1	0.891032	0.314433	0.541187	0.3808
GOBP_CATECHOL_CONTAINING_COMPOUND_BIOSYNTHETIC_PROCESS	1	1	1	0.397267	0.625843	0.440367
GOBP_CATECHOL_CONTAINING_COMPOUND_CATABOLIC_PROCESS	1	1	1	0.314433	0.541187	0.3808
GOBP_CATECHOL_CONTAINING_COMPOUND_METABOLIC_PROCESS	0.99456	1	0.891032	0.0633282	0.180263	0.12684
GOBP_CATECHOLAMINE_SECRETION	0.967531	1	0.891032	0.729774	0.911992	0.641713
GOBP_CATECHOLAMINE_UPTAKE	1	1	1	0.61967	0.831347	0.584968
GOBP_CATECHOLAMINE_UPTAKE_INVOLVED_IN_SYNAPTIC_TRANSMISSION	1	1	1	0.762886	0.928713	0.653479
GOBP_CAVEOLIN_MEDIATED_ENDOCYTOSIS	0.319186	1	0.891032	0.400195	0.625843	0.440367
GOBP_CD4_POSITIVE_ALPHA_BETA_T_CELL_ACTIVATION	0.997075	1	0.891032	0.00355143	0.0207151	0.0145759
GOBP_CD4_POSITIVE_ALPHA_BETA_T_CELL_CYTOKINE_PRODUCTION	1	1	1	0.0446818	0.137547	0.0967838
GOBP_CD4_POSITIVE_ALPHA_BETA_T_CELL_DIFFERENTIATION	0.986482	1	0.891032	0.00355192	0.0207151	0.0145759
GOBP_CD4_POSITIVE_ALPHA_BETA_T_CELL_PROLIFERATION	1	1	1	0.0382082	0.121462	0.0854656
GOBP_CD4_POSITIVE_OR_CD8_POSITIVE_ALPHA_BETA_T_CELL_LINEAGE_COMMITMENT	1	1	1	0.0313042	0.105267	0.07407
GOBP_CD40_SIGNALING_PATHWAY	0.0477187	0.312998	0.278892	0.518193	0.738578	0.519693
GOBP_CD8_POSITIVE_ALPHA_BETA_T_CELL_ACTIVATION	1	1	1	0.0766136	0.208881	0.146977
GOBP_CD8_POSITIVE_ALPHA_BETA_T_CELL_DIFFERENTIATION	1	1	1	0.204863	0.407101	0.286452
GOBP_CDC42_PROTEIN_SIGNAL_TRANSDUCTION	0.753944	1	0.891032	0.0644279	0.180958	0.127329
GOBP_CDP_DIACYLGLYCEROL_BIOSYNTHETIC_PROCESS	0.728013	1	0.891032	1	1	1
GOBP_CELL_ADHESION_MEDIATED_BY_INTEGRIN	0.999271	1	0.891032	5.35e-17	2.51e-14	1.77e-14
GOBP_CELL_ADHESION_MOLECULE_PRODUCTION	0.926096	1	0.891032	0.163259	0.346236	0.243625
GOBP_CELL_AGGREGATION	1	1	1	0.011121	0.0491987	0.0346181
GOBP_CELL_AGING	0.204362	0.908411	0.809424	0.543118	0.764802	0.538145
GOBP_CELL_CELL_ADHESION_INVOLVED_IN_GASTRULATION	1	1	1	0.762886	0.928713	0.653479
GOBP_CELL_CELL_ADHESION_MEDIATED_BY_CADHERIN	0.939526	1	0.891032	0.0102144	0.0463331	0.0326018
GOBP_CELL_CELL_ADHESION_MEDIATED_BY_INTEGRIN	1	1	1	3.04e-06	7.54e-05	5.3e-05
GOBP_CELL_CELL_ADHESION_VIA_PLASMA_MEMBRANE_ADHESION_MOLECULES	1	1	0.891032	3.32e-09	2.15e-07	1.51e-07
GOBP_CELL_CELL_JUNCTION_ASSEMBLY	0.998808	1	0.891032	0.00092069	0.00734972	0.00517155
GOBP_CELL_CELL_JUNCTION_MAINTENANCE	1	1	1	0.813473	0.951613	0.669592
GOBP_CELL_CELL_JUNCTION_ORGANIZATION	0.999847	1	0.891032	3.16e-05	0.00049513	0.00034839
GOBP_CELL_CELL_RECOGNITION	0.785904	1	0.891032	0.0330042	0.109403	0.0769802
GOBP_CELL_CELL_SIGNALING_INVOLVED_IN_CARDIAC_CONDUCTION	1	1	1	0.314734	0.541187	0.3808
GOBP_CELL_CHEMOTAXIS	1	1	0.891032	4.45e-21	6.9e-18	4.85e-18
GOBP_CELL_COMMUNICATION_BY_ELECTRICAL_COUPLING	0.955239	1	0.891032	0.053833	0.159072	0.111929
GOBP_CELL_COMMUNICATION_BY_ELECTRICAL_COUPLING_INVOLVED_IN_CARDIAC_CONDUCTION	0.909686	1	0.891032	0.284196	0.516458	0.3634
GOBP_CELL_COMMUNICATION_INVOLVED_IN_CARDIAC_CONDUCTION	0.996708	1	0.891032	0.189702	0.387224	0.272466
GOBP_CELL_CYCLE_ARREST	0.0892096	0.512785	0.456908	0.65683	0.867202	0.610197
GOBP_CELL_CYCLE_CHECKPOINT	3.3e-05	0.00060858	0.00054226	0.982465	1	0.703639
GOBP_CELL_CYCLE_DNA_REPLICATION	0.578843	1	0.891032	0.980682	1	0.703639
GOBP_CELL_CYCLE_G1_S_PHASE_TRANSITION	0.00129576	0.0150274	0.0133899	0.984272	1	0.703639
GOBP_CELL_CYCLE_G2_M_PHASE_TRANSITION	1.19e-14	1.09e-12	9.7e-13	0.995034	1	0.703639
GOBP_CELL_DEATH_IN_RESPONSE_TO_HYDROGEN_PEROXIDE	0.151858	0.737134	0.656811	0.868066	0.985721	0.693592
GOBP_CELL_DEATH_IN_RESPONSE_TO_OXIDATIVE_STRESS	0.755531	1	0.891032	0.687818	0.894668	0.629523
GOBP_CELL_DIFFERENTIATION_IN_HINDBRAIN	1	1	1	0.677656	0.886399	0.623705
GOBP_CELL_DIFFERENTIATION_IN_SPINAL_CORD	0.992648	1	0.891032	0.926327	1	0.703639
GOBP_CELL_DIFFERENTIATION_INVOLVED_IN_EMBRYONIC_PLACENTA_DEVELOPMENT	1	1	1	0.93667	1	0.703639
GOBP_CELL_DIFFERENTIATION_INVOLVED_IN_KIDNEY_DEVELOPMENT	0.997022	1	0.891032	0.00051523	0.00479581	0.00337452
GOBP_CELL_DIFFERENTIATION_INVOLVED_IN_METANEPHROS_DEVELOPMENT	1	1	1	0.00111055	0.00858554	0.00604113
GOBP_CELL_FATE_COMMITMENT	0.999916	1	0.891032	0.00062857	0.00560414	0.00394329
GOBP_CELL_FATE_COMMITMENT_INVOLVED_IN_FORMATION_OF_PRIMARY_GERM_LAYER	0.506769	1	0.891032	0.203458	0.407101	0.286452
GOBP_CELL_FATE_COMMITMENT_INVOLVED_IN_PATTERN_SPECIFICATION	0.66767	1	0.891032	0.732662	0.911992	0.641713
GOBP_CELL_FATE_DETERMINATION	0.912551	1	0.891032	0.315595	0.541187	0.3808
GOBP_CELL_FATE_SPECIFICATION	0.998495	1	0.891032	0.0365874	0.118578	0.083436
GOBP_CELL_GROWTH	0.878356	1	0.891032	1.27e-05	0.00023151	0.0001629
GOBP_CELL_JUNCTION_ASSEMBLY	1	1	0.891032	4.3e-13	9.53e-11	6.7e-11
GOBP_CELL_JUNCTION_DISASSEMBLY	1	1	1	0.182956	0.374111	0.26324
GOBP_CELL_JUNCTION_MAINTENANCE	0.95951	1	0.891032	0.496002	0.720922	0.507269
GOBP_CELL_KILLING	0.999883	1	0.891032	0.00032292	0.00327422	0.00230387
GOBP_CELL_MATRIX_ADHESION	0.999886	1	0.891032	1.1e-13	3.03e-11	2.13e-11
GOBP_CELL_MATURATION	0.99994	1	0.891032	0.0530903	0.157077	0.110526
GOBP_CELL_MIGRATION_IN_HINDBRAIN	1	1	1	0.518193	0.738578	0.519693
GOBP_CELL_MIGRATION_INVOLVED_IN_GASTRULATION	1	1	1	0.518193	0.738578	0.519693
GOBP_CELL_MIGRATION_INVOLVED_IN_HEART_DEVELOPMENT	1	1	1	0.00040276	0.00386995	0.00272305
GOBP_CELL_MIGRATION_INVOLVED_IN_SPROUTING_ANGIOGENESIS	0.994816	1	0.891032	0.09885	0.245097	0.17246
GOBP_CELL_PROLIFERATION_IN_FOREBRAIN	1	1	1	0.144476	0.318402	0.22404
GOBP_CELL_PROLIFERATION_IN_HINDBRAIN	0.81783	1	0.891032	0.587784	0.801273	0.563807
GOBP_CELL_PROLIFERATION_INVOLVED_IN_HEART_MORPHOGENESIS	1	1	1	0.553951	0.771882	0.543127
GOBP_CELL_PROLIFERATION_INVOLVED_IN_KIDNEY_DEVELOPMENT	0.877999	1	0.891032	0.0800829	0.213754	0.150406
GOBP_CELL_PROLIFERATION_INVOLVED_IN_METANEPHROS_DEVELOPMENT	1	1	1	0.0942319	0.238198	0.167605
GOBP_CELL_RECOGNITION	0.999989	1	0.891032	0.0198802	0.0760252	0.0534943
GOBP_CELL_REDOX_HOMEOSTASIS	0.986572	1	0.891032	0.00696495	0.0348547	0.0245251
GOBP_CELL_SUBSTRATE_ADHESION	0.999999	1	0.891032	2.55e-20	2.96e-17	2.08e-17
GOBP_CELL_SUBSTRATE_JUNCTION_ORGANIZATION	0.977894	1	0.891032	3.55e-05	0.0005484	0.00038588
GOBP_CELL_SURFACE_RECEPTOR_SIGNALING_PATHWAY_INVOLVED_IN_HEART_DEVELOPMENT	1	1	1	0.0389222	0.122394	0.0861215
GOBP_CELL_VOLUME_HOMEOSTASIS	0.777956	1	0.891032	0.224683	0.43882	0.308771
GOBP_CELLULAR_ALDEHYDE_METABOLIC_PROCESS	1	1	1	0.00949592	0.0442383	0.0311278
GOBP_CELLULAR_AMINO_ACID_BIOSYNTHETIC_PROCESS	0.995966	1	0.891032	0.0241377	0.0879694	0.0618987
GOBP_CELLULAR_AMINO_ACID_CATABOLIC_PROCESS	1	1	1	0.00025403	0.00271786	0.00191239
GOBP_CELLULAR_AMINO_ACID_METABOLIC_PROCESS	0.223534	0.957459	0.853127	0.232897	0.449879	0.316552
GOBP_CELLULAR_ANION_HOMEOSTASIS	1	1	1	0.0644279	0.180958	0.127329
GOBP_CELLULAR_BIOGENIC_AMINE_METABOLIC_PROCESS	0.999616	1	0.891032	0.00231075	0.0147723	0.0103944
GOBP_CELLULAR_CARBOHYDRATE_BIOSYNTHETIC_PROCESS	0.921915	1	0.891032	0.0574439	0.166777	0.117351
GOBP_CELLULAR_CARBOHYDRATE_CATABOLIC_PROCESS	0.66685	1	0.891032	0.793142	0.943821	0.664109
GOBP_CELLULAR_CARBOHYDRATE_METABOLIC_PROCESS	0.997597	1	0.891032	0.17505	0.363211	0.25557
GOBP_CELLULAR_COMPONENT_ASSEMBLY_INVOLVED_IN_MORPHOGENESIS	0.988712	1	0.891032	0.00025299	0.00271786	0.00191239
GOBP_CELLULAR_COMPONENT_DISASSEMBLY_INVOLVED_IN_EXECUTION_PHASE_OF_APOPTOSIS	0.660938	1	0.891032	0.985013	1	0.703639
GOBP_CELLULAR_COMPONENT_MAINTENANCE	0.942888	1	0.891032	0.560345	0.778926	0.548083
GOBP_CELLULAR_COPPER_ION_HOMEOSTASIS	0.142388	0.705384	0.62852	0.480568	0.705096	0.496133
GOBP_CELLULAR_DEFENSE_RESPONSE	0.99555	1	0.891032	0.00021055	0.00236689	0.00166543
GOBP_CELLULAR_EXTRAVASATION	1	1	1	1.57e-08	9.04e-07	6.36e-07
GOBP_CELLULAR_GLUCAN_METABOLIC_PROCESS	0.853656	1	0.891032	0.222942	0.438165	0.30831
GOBP_CELLULAR_GLUCOSE_HOMEOSTASIS	0.894357	1	0.891032	0.280797	0.511879	0.360178
GOBP_CELLULAR_GLUCURONIDATION	1	1	1	0.0197719	0.075673	0.0532465
GOBP_CELLULAR_HORMONE_METABOLIC_PROCESS	0.999999	1	0.891032	2.39e-08	1.31e-06	9.22e-07
GOBP_CELLULAR_HYPEROSMOTIC_RESPONSE	0.39091	1	0.891032	0.00277262	0.0168898	0.0118843
GOBP_CELLULAR_IRON_ION_HOMEOSTASIS	0.505265	1	0.891032	0.690228	0.894668	0.629523
GOBP_CELLULAR_KETONE_METABOLIC_PROCESS	0.00346757	0.0350962	0.0312719	0.168217	0.355786	0.250345
GOBP_CELLULAR_LIPID_CATABOLIC_PROCESS	0.999992	1	0.891032	0.00206428	0.0135704	0.00954866
GOBP_CELLULAR_METABOLIC_COMPOUND_SALVAGE	0.641222	1	0.891032	0.0820916	0.216953	0.152657
GOBP_CELLULAR_MODIFIED_AMINO_ACID_BIOSYNTHETIC_PROCESS	1	1	1	0.0161934	0.0656481	0.0461926
GOBP_CELLULAR_MODIFIED_AMINO_ACID_CATABOLIC_PROCESS	1	1	1	0.00735984	0.0360555	0.02537
GOBP_CELLULAR_MODIFIED_AMINO_ACID_METABOLIC_PROCESS	0.999996	1	0.891032	1.02e-08	6.36e-07	4.47e-07
GOBP_CELLULAR_MONOVALENT_INORGANIC_CATION_HOMEOSTASIS	0.300157	1	0.891032	0.65909	0.869939	0.612123
GOBP_CELLULAR_OXIDANT_DETOXIFICATION	0.999964	1	0.891032	5.56e-06	0.00012095	8.51e-05
GOBP_CELLULAR_PIGMENTATION	0.0232646	0.179656	0.160079	0.372187	0.600818	0.422759
GOBP_CELLULAR_POTASSIUM_ION_HOMEOSTASIS	1	1	1	0.789695	0.942866	0.663438
GOBP_CELLULAR_PROCESS_INVOLVED_IN_REPRODUCTION_IN_MULTICELLULAR_ORGANISM	0.99179	1	0.891032	0.935958	1	0.703639
GOBP_CELLULAR_PROTEIN_COMPLEX_DISASSEMBLY	3.67e-25	9.21e-23	8.21e-23	0.830006	0.965945	0.679677
GOBP_CELLULAR_PROTEIN_CONTAINING_COMPLEX_LOCALIZATION	0.133475	0.6791	0.6051	0.919484	1	0.703639
GOBP_CELLULAR_RESPIRATION	1.4e-16	1.69e-14	1.51e-14	0.999947	1	0.703639
GOBP_CELLULAR_RESPONSE_TO_ABIOTIC_STIMULUS	0.698886	1	0.891032	0.0382361	0.121468	0.0854698
GOBP_CELLULAR_RESPONSE_TO_ACID_CHEMICAL	0.653312	1	0.891032	0.0207252	0.0782815	0.0550819
GOBP_CELLULAR_RESPONSE_TO_ACIDIC_PH	0.699351	1	0.891032	0.762886	0.928713	0.653479
GOBP_CELLULAR_RESPONSE_TO_ALCOHOL	0.975099	1	0.891032	0.125811	0.291597	0.205179
GOBP_CELLULAR_RESPONSE_TO_ALDEHYDE	1	1	1	0.400195	0.625843	0.440367
GOBP_CELLULAR_RESPONSE_TO_ALKALOID	0.822813	1	0.891032	0.496002	0.720922	0.507269
GOBP_CELLULAR_RESPONSE_TO_AMYLOID_BETA	0.912551	1	0.891032	0.0365121	0.118416	0.0833224
GOBP_CELLULAR_RESPONSE_TO_ANTIBIOTIC	0.728013	1	0.891032	0.174769	0.362791	0.255274
GOBP_CELLULAR_RESPONSE_TO_ARSENIC_CONTAINING_SUBSTANCE	1	1	1	0.884583	0.993928	0.699367
GOBP_CELLULAR_RESPONSE_TO_ATP	1	1	1	0.587784	0.801273	0.563807
GOBP_CELLULAR_RESPONSE_TO_BIOTIC_STIMULUS	0.995186	1	0.891032	5.32e-10	4.5e-08	3.17e-08
GOBP_CELLULAR_RESPONSE_TO_BRAIN_DERIVED_NEUROTROPHIC_FACTOR_STIMULUS	0.632654	1	0.891032	0.314433	0.541187	0.3808
GOBP_CELLULAR_RESPONSE_TO_CADMIUM_ION	0.977822	1	0.891032	0.0586021	0.168771	0.118754
GOBP_CELLULAR_RESPONSE_TO_CAFFEINE	0.632654	1	0.891032	0.314433	0.541187	0.3808
GOBP_CELLULAR_RESPONSE_TO_CALCIUM_ION	0.997177	1	0.891032	0.305438	0.541187	0.3808
GOBP_CELLULAR_RESPONSE_TO_CAMP	1	1	1	0.0005674	0.00517777	0.00364328
GOBP_CELLULAR_RESPONSE_TO_CARBOHYDRATE_STIMULUS	0.857597	1	0.891032	0.146135	0.318405	0.224042
GOBP_CELLULAR_RESPONSE_TO_CHEMICAL_STRESS	0.999029	1	0.891032	7.39e-06	0.00014851	0.0001045
GOBP_CELLULAR_RESPONSE_TO_CHOLESTEROL	0.850918	1	0.891032	0.649617	0.860608	0.605558
GOBP_CELLULAR_RESPONSE_TO_COPPER_ION	0.939526	1	0.891032	0.0326021	0.108224	0.0761507
GOBP_CELLULAR_RESPONSE_TO_CORTICOSTEROID_STIMULUS	0.997564	1	0.891032	0.0341161	0.112607	0.079235
GOBP_CELLULAR_RESPONSE_TO_DEXAMETHASONE_STIMULUS	0.945296	1	0.891032	0.0389222	0.122394	0.0861215
GOBP_CELLULAR_RESPONSE_TO_DRUG	0.986199	1	0.891032	0.169135	0.356986	0.251189
GOBP_CELLULAR_RESPONSE_TO_DSRNA	0.633629	1	0.891032	0.0944296	0.238198	0.167605
GOBP_CELLULAR_RESPONSE_TO_ELECTRICAL_STIMULUS	1	1	1	0.762886	0.928713	0.653479
GOBP_CELLULAR_RESPONSE_TO_EPINEPHRINE_STIMULUS	1	1	1	0.762886	0.928713	0.653479
GOBP_CELLULAR_RESPONSE_TO_ESTRADIOL_STIMULUS	0.869913	1	0.891032	0.215992	0.425043	0.299077
GOBP_CELLULAR_RESPONSE_TO_ESTROGEN_STIMULUS	0.777404	1	0.891032	0.0208235	0.0782815	0.0550819
GOBP_CELLULAR_RESPONSE_TO_ETHANOL	1	1	1	0.0978674	0.24292	0.170928
GOBP_CELLULAR_RESPONSE_TO_EXOGENOUS_DSRNA	0.52251	1	0.891032	0.0446818	0.137547	0.0967838
GOBP_CELLULAR_RESPONSE_TO_EXTERNAL_STIMULUS	0.518587	1	0.891032	2.31e-06	6.01e-05	4.23e-05
GOBP_CELLULAR_RESPONSE_TO_EXTRACELLULAR_STIMULUS	0.177484	0.80899	0.720837	6.95e-06	0.00014306	0.00010066
GOBP_CELLULAR_RESPONSE_TO_FATTY_ACID	0.888873	1	0.891032	0.023071	0.0845454	0.0594894
GOBP_CELLULAR_RESPONSE_TO_FLUID_SHEAR_STRESS	0.52251	1	0.891032	0.61967	0.831347	0.584968
GOBP_CELLULAR_RESPONSE_TO_GAMMA_RADIATION	0.12207	0.632178	0.563291	0.391385	0.625843	0.440367
GOBP_CELLULAR_RESPONSE_TO_GLUCAGON_STIMULUS	1	1	1	0.337637	0.569596	0.40079
GOBP_CELLULAR_RESPONSE_TO_GLUCOSE_STARVATION	0.487195	1	0.891032	0.169058	0.356985	0.251189
GOBP_CELLULAR_RESPONSE_TO_GONADOTROPIN_STIMULUS	1	1	1	0.236007	0.449879	0.316552
GOBP_CELLULAR_RESPONSE_TO_GROWTH_HORMONE_STIMULUS	0.918302	1	0.891032	0.548268	0.767641	0.540142
GOBP_CELLULAR_RESPONSE_TO_HEAT	0.00448294	0.0440685	0.0392665	0.379661	0.611399	0.430204
GOBP_CELLULAR_RESPONSE_TO_HYDROGEN_PEROXIDE	0.634592	1	0.891032	0.134377	0.305809	0.21518
GOBP_CELLULAR_RESPONSE_TO_INCREASED_OXYGEN_LEVELS	0.142388	0.705384	0.62852	0.813473	0.951613	0.669592
GOBP_CELLULAR_RESPONSE_TO_INORGANIC_SUBSTANCE	0.999902	1	0.891032	0.0101941	0.0463331	0.0326018
GOBP_CELLULAR_RESPONSE_TO_INSULIN_STIMULUS	0.972523	1	0.891032	0.330933	0.565613	0.397987
GOBP_CELLULAR_RESPONSE_TO_INTERFERON_ALPHA	1	1	1	0.0279142	0.0954538	0.067165
GOBP_CELLULAR_RESPONSE_TO_INTERFERON_BETA	0.877999	1	0.891032	0.0250999	0.090344	0.0635696
GOBP_CELLULAR_RESPONSE_TO_IONIZING_RADIATION	0.00754834	0.0689794	0.0614629	0.194298	0.394874	0.277849
GOBP_CELLULAR_RESPONSE_TO_KETONE	0.979865	1	0.891032	0.00649667	0.0329004	0.02315
GOBP_CELLULAR_RESPONSE_TO_LEPTIN_STIMULUS	0.850918	1	0.891032	0.159763	0.341386	0.240212
GOBP_CELLULAR_RESPONSE_TO_LEUCINE	0.632654	1	0.891032	0.698587	0.894668	0.629523
GOBP_CELLULAR_RESPONSE_TO_LEUCINE_STARVATION	1	1	1	0.698587	0.894668	0.629523
GOBP_CELLULAR_RESPONSE_TO_LIGHT_STIMULUS	0.3887	1	0.891032	0.750578	0.927186	0.652404
GOBP_CELLULAR_RESPONSE_TO_LIPOPROTEIN_PARTICLE_STIMULUS	0.96687	1	0.891032	0.179579	0.37112	0.261135
GOBP_CELLULAR_RESPONSE_TO_LITHIUM_ION	0.728013	1	0.891032	0.441182	0.668447	0.470345
GOBP_CELLULAR_RESPONSE_TO_LOW_DENSITY_LIPOPROTEIN_PARTICLE_STIMULUS	0.889635	1	0.891032	0.0944296	0.238198	0.167605
GOBP_CELLULAR_RESPONSE_TO_MANGANESE_ION	1	1	1	0.441182	0.668447	0.470345
GOBP_CELLULAR_RESPONSE_TO_MECHANICAL_STIMULUS	0.994736	1	0.891032	0.0360102	0.117279	0.082522
GOBP_CELLULAR_RESPONSE_TO_MOLECULE_OF_BACTERIAL_ORIGIN	0.996356	1	0.891032	4.01e-10	3.45e-08	2.43e-08
GOBP_CELLULAR_RESPONSE_TO_NITROGEN_STARVATION	0.119968	0.627333	0.558974	1	1	1
GOBP_CELLULAR_RESPONSE_TO_NUTRIENT	0.0999703	0.550345	0.490375	1.18e-06	3.54e-05	2.49e-05
GOBP_CELLULAR_RESPONSE_TO_OSMOTIC_STRESS	0.516696	1	0.891032	0.00971372	0.0449828	0.0316516
GOBP_CELLULAR_RESPONSE_TO_OXIDISED_LOW_DENSITY_LIPOPROTEIN_PARTICLE_STIMULUS	1	1	1	0.35784	0.587853	0.413636
GOBP_CELLULAR_RESPONSE_TO_OXYGEN_LEVELS	1.27e-05	0.00026728	0.00023816	0.0269259	0.0954538	0.067165
GOBP_CELLULAR_RESPONSE_TO_OXYGEN_RADICAL	1	1	1	0.0555532	0.162199	0.114129
GOBP_CELLULAR_RESPONSE_TO_PEPTIDE	0.999584	1	0.891032	0.153644	0.33336	0.234565
GOBP_CELLULAR_RESPONSE_TO_PEPTIDE_HORMONE_STIMULUS	0.999316	1	0.891032	0.369069	0.597027	0.420092
GOBP_CELLULAR_RESPONSE_TO_PH	0.889635	1	0.891032	0.728217	0.911992	0.641713
GOBP_CELLULAR_RESPONSE_TO_POTASSIUM_ION	1	1	1	0.732662	0.911992	0.641713
GOBP_CELLULAR_RESPONSE_TO_PROSTAGLANDIN_E_STIMULUS	0.777404	1	0.891032	0.236007	0.449879	0.316552
GOBP_CELLULAR_RESPONSE_TO_PROSTAGLANDIN_STIMULUS	0.865136	1	0.891032	0.0197719	0.075673	0.0532465
GOBP_CELLULAR_RESPONSE_TO_PURINE_CONTAINING_COMPOUND	0.728013	1	0.891032	0.441182	0.668447	0.470345
GOBP_CELLULAR_RESPONSE_TO_RADIATION	0.0934433	0.531605	0.473678	0.395421	0.625843	0.440367
GOBP_CELLULAR_RESPONSE_TO_REACTIVE_NITROGEN_SPECIES	1	1	1	0.00848257	0.0402015	0.0282873
GOBP_CELLULAR_RESPONSE_TO_REACTIVE_OXYGEN_SPECIES	0.971921	1	0.891032	0.00622258	0.0318942	0.022442
GOBP_CELLULAR_RESPONSE_TO_RETINOIC_ACID	0.987346	1	0.891032	0.0109236	0.0486027	0.0341988
GOBP_CELLULAR_RESPONSE_TO_SALT_STRESS	0.282488	1	0.891032	0.119101	0.277425	0.195207
GOBP_CELLULAR_RESPONSE_TO_STARVATION	0.110241	0.596904	0.531861	0.116195	0.277425	0.195207
GOBP_CELLULAR_RESPONSE_TO_STEROID_HORMONE_STIMULUS	0.919077	1	0.891032	0.100049	0.247674	0.174273
GOBP_CELLULAR_RESPONSE_TO_STEROL	0.909686	1	0.891032	0.771882	0.936407	0.658893
GOBP_CELLULAR_RESPONSE_TO_STEROL_DEPLETION	0.459037	1	0.891032	1	1	1
GOBP_CELLULAR_RESPONSE_TO_THYROID_HORMONE_STIMULUS	0.798628	1	0.891032	0.267886	0.49345	0.347211
GOBP_CELLULAR_RESPONSE_TO_TOPOLOGICALLY_INCORRECT_PROTEIN	0.028961	0.214508	0.191133	0.972854	1	0.703639
GOBP_CELLULAR_RESPONSE_TO_TOXIC_SUBSTANCE	0.999934	1	0.891032	1.02e-05	0.00019077	0.00013423
GOBP_CELLULAR_RESPONSE_TO_UV	0.214461	0.93398	0.832206	0.190639	0.388968	0.273693
GOBP_CELLULAR_RESPONSE_TO_UV_A	1	1	1	0.00470779	0.0256629	0.0180574
GOBP_CELLULAR_RESPONSE_TO_VASCULAR_ENDOTHELIAL_GROWTH_FACTOR_STIMULUS	0.999271	1	0.891032	0.00086262	0.00708046	0.00498209
GOBP_CELLULAR_RESPONSE_TO_VIRUS	0.808991	1	0.891032	0.263456	0.490449	0.345099
GOBP_CELLULAR_RESPONSE_TO_VITAMIN	0.793915	1	0.891032	1.75e-07	6.8e-06	4.79e-06
GOBP_CELLULAR_RESPONSE_TO_VITAMIN_D	0.889635	1	0.891032	5.93e-05	0.0008418	0.00059233
GOBP_CELLULAR_RESPONSE_TO_X_RAY	0.319186	1	0.891032	0.146065	0.318402	0.22404
GOBP_CELLULAR_RESPONSE_TO_ZINC_ION	1	1	1	0.126692	0.291892	0.205387
GOBP_CELLULAR_SENESCENCE	0.217438	0.937748	0.835563	0.803234	0.951613	0.669592
GOBP_CELLULAR_SODIUM_ION_HOMEOSTASIS	1	1	1	0.159763	0.341386	0.240212
GOBP_CELLULAR_TRANSITION_METAL_ION_HOMEOSTASIS	0.576416	1	0.891032	0.354479	0.587853	0.413636
GOBP_CENTRAL_NERVOUS_SYSTEM_NEURON_AXONOGENESIS	0.660938	1	0.891032	0.361464	0.590887	0.415771
GOBP_CENTRAL_NERVOUS_SYSTEM_NEURON_DEVELOPMENT	0.986482	1	0.891032	0.036429	0.118416	0.0833224
GOBP_CENTRAL_NERVOUS_SYSTEM_NEURON_DIFFERENTIATION	0.999575	1	0.891032	0.0440436	0.136927	0.0963469
GOBP_CENTRAL_NERVOUS_SYSTEM_PROJECTION_NEURON_AXONOGENESIS	0.723447	1	0.891032	0.163259	0.346236	0.243625
GOBP_CENTRIOLE_ASSEMBLY	4.69e-05	0.00080635	0.00071849	0.995494	1	0.703639
GOBP_CENTRIOLE_CENTRIOLE_COHESION	0.142388	0.705384	0.62852	1	1	1
GOBP_CENTROMERE_COMPLEX_ASSEMBLY	0.0152946	0.126559	0.112768	1	1	1
GOBP_CENTROMERIC_SISTER_CHROMATID_COHESION	0.66767	1	0.891032	0.732662	0.911992	0.641713
GOBP_CENTROSOME_DUPLICATION	0.0003403	0.004676	0.00416647	1	1	1
GOBP_CENTROSOME_SEPARATION	0.425503	1	0.891032	0.518193	0.738578	0.519693
GOBP_CERAMIDE_BIOSYNTHETIC_PROCESS	0.639083	1	0.891032	0.660198	0.870907	0.612804
GOBP_CERAMIDE_CATABOLIC_PROCESS	0.877999	1	0.891032	0.703835	0.897192	0.631299
GOBP_CERAMIDE_METABOLIC_PROCESS	0.645361	1	0.891032	0.486942	0.713099	0.501764
GOBP_CERAMIDE_TRANSPORT	0.753944	1	0.891032	1	1	1
GOBP_CEREBELLAR_CORTEX_DEVELOPMENT	0.80343	1	0.891032	0.747986	0.927186	0.652404
GOBP_CEREBELLAR_CORTEX_FORMATION	1	1	1	0.750873	0.927186	0.652404
GOBP_CEREBELLAR_CORTEX_MORPHOGENESIS	0.95951	1	0.891032	0.71722	0.910513	0.640673
GOBP_CEREBELLAR_GRANULAR_LAYER_DEVELOPMENT	1	1	1	0.146065	0.318402	0.22404
GOBP_CEREBELLAR_PURKINJE_CELL_DIFFERENTIATION	1	1	1	1	1	1
GOBP_CEREBELLAR_PURKINJE_CELL_LAYER_DEVELOPMENT	0.900163	1	0.891032	0.93667	1	0.703639
GOBP_CEREBELLAR_PURKINJE_CELL_LAYER_FORMATION	1	1	1	1	1	1
GOBP_CEREBELLAR_PURKINJE_CELL_LAYER_MORPHOGENESIS	1	1	1	1	1	1
GOBP_CEREBRAL_CORTEX_CELL_MIGRATION	0.73186	1	0.891032	0.0667373	0.186137	0.130973
GOBP_CEREBRAL_CORTEX_DEVELOPMENT	0.894254	1	0.891032	0.148318	0.323009	0.227282
GOBP_CEREBRAL_CORTEX_GABAERGIC_INTERNEURON_DIFFERENTIATION	1	1	1	0.698587	0.894668	0.629523
GOBP_CEREBRAL_CORTEX_NEURON_DIFFERENTIATION	0.865136	1	0.891032	0.677656	0.886399	0.623705
GOBP_CEREBRAL_CORTEX_RADIALLY_ORIENTED_CELL_MIGRATION	0.777956	1	0.891032	0.418058	0.649196	0.4568
GOBP_CEREBROSPINAL_FLUID_CIRCULATION	1	1	1	0.314433	0.541187	0.3808
GOBP_CGMP_BIOSYNTHETIC_PROCESS	1	1	1	0.119101	0.277425	0.195207
GOBP_CGMP_MEDIATED_SIGNALING	1	1	1	0.0127391	0.0547441	0.0385201
GOBP_CGMP_METABOLIC_PROCESS	1	1	1	0.0354722	0.115689	0.0814031
GOBP_CHAPERONE_COFACTOR_DEPENDENT_PROTEIN_REFOLDING	0.848016	1	0.891032	0.545399	0.765929	0.538938
GOBP_CHAPERONE_MEDIATED_AUTOPHAGY	1	1	1	0.853273	0.976915	0.687396
GOBP_CHAPERONE_MEDIATED_PROTEIN_COMPLEX_ASSEMBLY	0.00331906	0.0338652	0.030175	0.928592	1	0.703639
GOBP_CHAPERONE_MEDIATED_PROTEIN_FOLDING	0.862557	1	0.891032	0.730265	0.911992	0.641713
GOBP_CHAPERONE_MEDIATED_PROTEIN_TRANSPORT	0.66767	1	0.891032	1	1	1
GOBP_CHEMICAL_HOMEOSTASIS_WITHIN_A_TISSUE	1	1	1	0.00175072	0.0120352	0.00846846
GOBP_CHEMICAL_SYNAPTIC_TRANSMISSION_POSTSYNAPTIC	0.999681	1	0.891032	0.983232	1	0.703639
GOBP_CHEMOKINE_C_X_C_MOTIF_LIGAND_2_PRODUCTION	0.81783	1	0.891032	0.587784	0.801273	0.563807
GOBP_CHEMOKINE_PRODUCTION	0.995594	1	0.891032	0.00075704	0.00639433	0.0044993
GOBP_CHEMOSENSORY_BEHAVIOR	1	1	1	0.813473	0.951613	0.669592
GOBP_CHLORIDE_TRANSPORT	1	1	1	0.462237	0.690879	0.48613
GOBP_CHOLESTEROL_CATABOLIC_PROCESS	0.66767	1	0.891032	0.119101	0.277425	0.195207
GOBP_CHOLESTEROL_EFFLUX	0.741808	1	0.891032	0.437666	0.668447	0.470345
GOBP_CHOLESTEROL_STORAGE	0.865136	1	0.891032	0.0197719	0.075673	0.0532465
GOBP_CHONDROCYTE_DEVELOPMENT	0.939526	1	0.891032	2.24e-05	0.00036945	0.00025996
GOBP_CHONDROCYTE_DIFFERENTIATION	0.99752	1	0.891032	1.54e-10	1.44e-08	1.01e-08
GOBP_CHONDROCYTE_DIFFERENTIATION_INVOLVED_IN_ENDOCHONDRAL_BONE_MORPHOGENESIS	1	1	1	0.0644279	0.180958	0.127329
GOBP_CHONDROCYTE_PROLIFERATION	1	1	1	0.0197719	0.075673	0.0532465
GOBP_CHONDROITIN_SULFATE_BIOSYNTHETIC_PROCESS	0.918302	1	0.891032	0.0555532	0.162199	0.114129
GOBP_CHONDROITIN_SULFATE_CATABOLIC_PROCESS	1	1	1	0.0644279	0.180958	0.127329
GOBP_CHONDROITIN_SULFATE_PROTEOGLYCAN_BIOSYNTHETIC_PROCESS	0.950516	1	0.891032	0.115478	0.277425	0.195207
GOBP_CHONDROITIN_SULFATE_PROTEOGLYCAN_METABOLIC_PROCESS	0.986572	1	0.891032	0.207053	0.409223	0.287946
GOBP_CHROMATIN_ASSEMBLY_OR_DISASSEMBLY	0.152721	0.737174	0.656846	1	1	0.703639
GOBP_CHROMATIN_DISASSEMBLY	0.296158	1	0.891032	0.909215	1	0.703639
GOBP_CHROMATIN_MEDIATED_MAINTENANCE_OF_TRANSCRIPTION	0.699351	1	0.891032	0.400195	0.625843	0.440367
GOBP_CHROMATIN_ORGANIZATION_INVOLVED_IN_REGULATION_OF_TRANSCRIPTION	0.993081	1	0.891032	0.999987	1	0.703639
GOBP_CHROMATIN_REMODELING	0.00487856	0.0475849	0.0423997	1	1	0.703639
GOBP_CHROMATIN_REMODELING_AT_CENTROMERE	0.0312754	0.22732	0.20255	1	1	1
GOBP_CHROMATIN_SILENCING	0.981531	1	0.891032	0.999904	1	0.703639
GOBP_CHROMATIN_SILENCING_AT_TELOMERE	1	1	1	0.732662	0.911992	0.641713
GOBP_CHROMOSOME_CONDENSATION	0.8272	1	0.891032	0.605834	0.818923	0.576226
GOBP_CHROMOSOME_LOCALIZATION	0.145838	0.717752	0.63954	0.996185	1	0.703639
GOBP_CHROMOSOME_ORGANIZATION_INVOLVED_IN_MEIOTIC_CELL_CYCLE	0.442112	1	0.891032	0.99964	1	0.703639
GOBP_CHROMOSOME_SEGREGATION	6.49e-06	0.00014611	0.00013019	1	1	0.703639
GOBP_CHROMOSOME_SEPARATION	0.00019527	0.00295263	0.00263089	0.9647	1	0.703639
GOBP_CHRONIC_INFLAMMATORY_RESPONSE	1	1	1	1.19e-06	3.54e-05	2.49e-05
GOBP_CHYLOMICRON_ASSEMBLY	1	1	1	1	1	1
GOBP_CILIARY_BASAL_BODY_PLASMA_MEMBRANE_DOCKING	1.38e-07	4.15e-06	3.7e-06	0.999053	1	0.703639
GOBP_CILIUM_MOVEMENT	0.978615	1	0.891032	0.938474	1	0.703639
GOBP_CILIUM_OR_FLAGELLUM_DEPENDENT_CELL_MOTILITY	0.925783	1	0.891032	0.980136	1	0.703639
GOBP_CILIUM_ORGANIZATION	0.00026408	0.00383889	0.00342058	0.99999	1	0.703639
GOBP_CIRCADIAN_REGULATION_OF_GENE_EXPRESSION	0.62451	1	0.891032	0.888079	0.995933	0.700777
GOBP_CIRCADIAN_RHYTHM	0.985144	1	0.891032	0.992447	1	0.703639
GOBP_CIRCADIAN_SLEEP_WAKE_CYCLE	1	1	1	1	1	1
GOBP_CIRCADIAN_SLEEP_WAKE_CYCLE_SLEEP	1	1	1	1	1	1
GOBP_CLATHRIN_COAT_ASSEMBLY	0.835202	1	0.891032	1	1	1
GOBP_CLATHRIN_DEPENDENT_ENDOCYTOSIS	0.64995	1	0.891032	0.778866	0.941517	0.662488
GOBP_CLEAVAGE_INVOLVED_IN_RRNA_PROCESSING	0.00060521	0.00777682	0.0069294	1	1	1
GOBP_COAGULATION	0.999554	1	0.891032	1.87e-06	5.14e-05	3.62e-05
GOBP_COBALAMIN_METABOLIC_PROCESS	0.633629	1	0.891032	0.728217	0.911992	0.641713
GOBP_COCHLEA_DEVELOPMENT	0.632487	1	0.891032	0.129354	0.297143	0.209081
GOBP_COCHLEA_MORPHOGENESIS	0.633629	1	0.891032	0.0944296	0.238198	0.167605
GOBP_COENZYME_A_BIOSYNTHETIC_PROCESS	0.632654	1	0.891032	1	1	1
GOBP_COENZYME_A_METABOLIC_PROCESS	0.777404	1	0.891032	1	1	1
GOBP_COGNITION	0.991007	1	0.891032	0.0591998	0.170387	0.119891
GOBP_COLLAGEN_ACTIVATED_SIGNALING_PATHWAY	1	1	1	0.0802841	0.213754	0.150406
GOBP_COLLAGEN_ACTIVATED_TYROSINE_KINASE_RECEPTOR_SIGNALING_PATHWAY	1	1	1	0.400195	0.625843	0.440367
GOBP_COLLAGEN_BIOSYNTHETIC_PROCESS	1	1	1	0.0003599	0.00360991	0.00254007
GOBP_COLLAGEN_CATABOLIC_PROCESS	1	1	1	2.85e-07	1.05e-05	7.41e-06
GOBP_COLLAGEN_FIBRIL_ORGANIZATION	1	1	1	2.51e-13	5.85e-11	4.12e-11
GOBP_COLLAGEN_METABOLIC_PROCESS	1	1	1	1.65e-11	2.14e-09	1.5e-09
GOBP_COLLATERAL_SPROUTING	0.900163	1	0.891032	0.0384277	0.121579	0.0855476
GOBP_COLLECTING_DUCT_DEVELOPMENT	1	1	1	0.267886	0.49345	0.347211
GOBP_COLUMNAR_CUBOIDAL_EPITHELIAL_CELL_DEVELOPMENT	0.89736	1	0.891032	0.454719	0.684875	0.481905
GOBP_COLUMNAR_CUBOIDAL_EPITHELIAL_CELL_DIFFERENTIATION	0.987504	1	0.891032	0.319923	0.548204	0.385738
GOBP_COMMISSURAL_NEURON_AXON_GUIDANCE	1	1	1	0.146065	0.318402	0.22404
GOBP_COMPLEMENT_ACTIVATION	0.999999	1	0.891032	0.995028	1	0.703639
GOBP_COMPLEMENT_ACTIVATION_ALTERNATIVE_PATHWAY	1	1	1	0.884583	0.993928	0.699367
GOBP_COMPLEMENT_ACTIVATION_LECTIN_PATHWAY	0.699351	1	0.891032	0.400195	0.625843	0.440367
GOBP_COMPLEMENT_DEPENDENT_CYTOTOXICITY	1	1	1	0.698587	0.894668	0.629523
GOBP_COMPLEMENT_RECEPTOR_MEDIATED_SIGNALING_PATHWAY	1	1	1	0.441182	0.668447	0.470345
GOBP_CONNECTIVE_TISSUE_DEVELOPMENT	0.999539	1	0.891032	4.69e-12	7.04e-10	4.96e-10
GOBP_CONNECTIVE_TISSUE_REPLACEMENT	1	1	1	0.677656	0.886399	0.623705
GOBP_CONVERGENT_EXTENSION	0.0589823	0.370114	0.329784	0.0275341	0.0954538	0.067165
GOBP_COPII_COATED_VESICLE_BUDDING	0.0195306	0.157121	0.14	0.971539	1	0.703639
GOBP_COPII_COATED_VESICLE_CARGO_LOADING	0.777404	1	0.891032	1	1	1
GOBP_COPPER_ION_HOMEOSTASIS	0.216316	0.93398	0.832206	0.587784	0.801273	0.563807
GOBP_COPPER_ION_TRANSPORT	1	1	1	0.0978674	0.24292	0.170928
GOBP_COPULATION	1	1	1	0.36512	0.59217	0.416674
GOBP_CORNEA_DEVELOPMENT_IN_CAMERA_TYPE_EYE	1	1	1	0.732662	0.911992	0.641713
GOBP_CORNIFICATION	0.999988	1	0.891032	1.59e-05	0.00027764	0.00019536
GOBP_CORONARY_VASCULATURE_DEVELOPMENT	0.614473	1	0.891032	0.565014	0.783545	0.551333
GOBP_CORONARY_VASCULATURE_MORPHOGENESIS	1	1	1	0.0978674	0.24292	0.170928
GOBP_CORPUS_CALLOSUM_DEVELOPMENT	0.777404	1	0.891032	0.236007	0.449879	0.316552
GOBP_CORTICAL_ACTIN_CYTOSKELETON_ORGANIZATION	0.888873	1	0.891032	0.00801674	0.0389863	0.0274323
GOBP_CORTICAL_CYTOSKELETON_ORGANIZATION	0.815632	1	0.891032	0.00051523	0.00479581	0.00337452
GOBP_CORTICOSTEROID_HORMONE_SECRETION	1	1	1	0.553951	0.771882	0.543127
GOBP_CORTICOSTEROID_RECEPTOR_SIGNALING_PATHWAY	0.142388	0.705384	0.62852	1	1	1
GOBP_CORTISOL_METABOLIC_PROCESS	1	1	1	0.35784	0.587853	0.413636
GOBP_COTRANSLATIONAL_PROTEIN_TARGETING_TO_MEMBRANE	1.1e-12	6.81e-11	6.07e-11	1	1	1
GOBP_COVALENT_CHROMATIN_MODIFICATION	4.46e-12	2.66e-10	2.37e-10	0.998237	1	0.703639
GOBP_CRANIAL_NERVE_DEVELOPMENT	0.989014	1	0.891032	0.0615928	0.176814	0.124413
GOBP_CRANIAL_NERVE_MORPHOGENESIS	1	1	1	0.163259	0.346236	0.243625
GOBP_CRANIAL_SKELETAL_SYSTEM_DEVELOPMENT	0.988399	1	0.891032	0.111217	0.269165	0.189395
GOBP_CRANIOFACIAL_SUTURE_MORPHOGENESIS	0.81783	1	0.891032	0.0354722	0.115689	0.0814031
GOBP_CRISTAE_FORMATION	3.57e-10	1.62e-08	1.44e-08	1	1	1
GOBP_CYCLIC_NUCLEOTIDE_BIOSYNTHETIC_PROCESS	1	1	1	0.460015	0.688396	0.484382
GOBP_CYCLIC_NUCLEOTIDE_CATABOLIC_PROCESS	1	1	1	0.480568	0.705096	0.496133
GOBP_CYCLIC_NUCLEOTIDE_MEDIATED_SIGNALING	0.992242	1	0.891032	0.117568	0.277425	0.195207
GOBP_CYCLIC_NUCLEOTIDE_METABOLIC_PROCESS	1	1	1	0.294973	0.531888	0.374257
GOBP_CYCLOOXYGENASE_PATHWAY	1	1	1	5.08e-05	0.00073666	0.00051834
GOBP_CYSTEINE_METABOLIC_PROCESS	1	1	1	0.146065	0.318402	0.22404
GOBP_CYTIDINE_TO_URIDINE_EDITING	1	1	1	0.0382082	0.121462	0.0854656
GOBP_CYTOCHROME_COMPLEX_ASSEMBLY	7.64e-05	0.00123499	0.00110041	1	1	1
GOBP_CYTOKINE_PRODUCTION_INVOLVED_IN_IMMUNE_RESPONSE	0.999912	1	0.891032	0.00055614	0.00509505	0.00358508
GOBP_CYTOKINE_PRODUCTION_INVOLVED_IN_INFLAMMATORY_RESPONSE	0.999014	1	0.891032	0.249002	0.470316	0.330932
GOBP_CYTOKINESIS	0.0902456	0.516173	0.459927	0.97725	1	0.703639
GOBP_CYTOKINETIC_PROCESS	0.495773	1	0.891032	0.819139	0.956075	0.672732
GOBP_CYTOLYSIS	0.808851	1	0.891032	0.26888	0.49345	0.347211
GOBP_CYTOPLASM_ORGANIZATION	1	1	1	1	1	1
GOBP_CYTOPLASMIC_MICROTUBULE_ORGANIZATION	0.00498783	0.0483999	0.0431259	0.976771	1	0.703639
GOBP_CYTOPLASMIC_PATTERN_RECOGNITION_RECEPTOR_SIGNALING_PATHWAY	0.24488	0.991976	0.883883	0.920972	1	0.703639
GOBP_CYTOPLASMIC_PATTERN_RECOGNITION_RECEPTOR_SIGNALING_PATHWAY_IN_RESPONSE_TO_VIRUS	0.364029	1	0.891032	0.71722	0.910513	0.640673
GOBP_CYTOPLASMIC_SEQUESTERING_OF_PROTEIN	0.633629	1	0.891032	0.728217	0.911992	0.641713
GOBP_CYTOPLASMIC_SEQUESTERING_OF_TRANSCRIPTION_FACTOR	0.777404	1	0.891032	1	1	1
GOBP_CYTOPLASMIC_TRANSLATION	2.82e-09	1.15e-07	1.03e-07	0.999995	1	0.703639
GOBP_CYTOPLASMIC_TRANSLATIONAL_ELONGATION	0.0796921	0.466626	0.415779	1	1	1
GOBP_CYTOPLASMIC_TRANSLATIONAL_INITIATION	0.00092708	0.0112233	0.0100004	1	1	1
GOBP_CYTOSKELETON_DEPENDENT_CYTOKINESIS	0.330032	1	0.891032	0.556789	0.775141	0.54542
GOBP_CYTOSKELETON_DEPENDENT_INTRACELLULAR_TRANSPORT	0.231877	0.987577	0.879963	0.936729	1	0.703639
GOBP_CYTOSOLIC_CALCIUM_ION_TRANSPORT	0.999995	1	0.891032	0.00088478	0.00713654	0.00502155
GOBP_CYTOSOLIC_TRANSPORT	0.109472	0.594752	0.529944	0.703151	0.897192	0.631299
GOBP_DE_NOVO_PROTEIN_FOLDING	0.595919	1	0.891032	0.731353	0.911992	0.641713
GOBP_DEADENYLATION_DEPENDENT_DECAPPING_OF_NUCLEAR_TRANSCRIBED_MRNA	1	1	1	1	1	1
GOBP_DECIDUALIZATION	0.865136	1	0.891032	0.00015436	0.00183258	0.00128947
GOBP_DEDIFFERENTIATION	1	1	1	1	1	1
GOBP_DEFENSE_RESPONSE_TO_BACTERIUM	1	1	0.891032	0.00513115	0.0272343	0.0191631
GOBP_DEFENSE_RESPONSE_TO_FUNGUS	0.89736	1	0.891032	0.0667373	0.186137	0.130973
GOBP_DEFENSE_RESPONSE_TO_GRAM_NEGATIVE_BACTERIUM	0.917146	1	0.891032	0.0526978	0.156114	0.109848
GOBP_DEFENSE_RESPONSE_TO_GRAM_POSITIVE_BACTERIUM	0.986934	1	0.891032	0.00610919	0.0313821	0.0220817
GOBP_DEFENSE_RESPONSE_TO_VIRUS	0.75216	1	0.891032	2.97e-06	7.4e-05	5.2e-05
GOBP_DEFINITIVE_HEMOPOIESIS	0.552313	1	0.891032	0.159763	0.341386	0.240212
GOBP_DEMETHYLATION	0.379077	1	0.891032	0.920972	1	0.703639
GOBP_DENDRITE_DEVELOPMENT	0.800211	1	0.891032	0.0049536	0.0264079	0.0185816
GOBP_DENDRITE_EXTENSION	0.25558	1	0.891032	0.789252	0.942866	0.663438
GOBP_DENDRITE_MORPHOGENESIS	0.682866	1	0.891032	0.0225703	0.0836988	0.0588937
GOBP_DENDRITE_SELF_AVOIDANCE	1	1	1	0.0354722	0.115689	0.0814031
GOBP_DENDRITIC_CELL_ANTIGEN_PROCESSING_AND_PRESENTATION	1	1	1	0.00418303	0.0235403	0.0165639
GOBP_DENDRITIC_CELL_APOPTOTIC_PROCESS	1	1	1	0.00057598	0.00518495	0.00364833
GOBP_DENDRITIC_CELL_CHEMOTAXIS	1	1	1	0.00078921	0.00658241	0.00463164
GOBP_DENDRITIC_CELL_CYTOKINE_PRODUCTION	1	1	1	0.441182	0.668447	0.470345
GOBP_DENDRITIC_CELL_DIFFERENTIATION	0.946406	1	0.891032	0.00163768	0.0114785	0.00807674
GOBP_DENDRITIC_CELL_MIGRATION	0.945296	1	0.891032	0.00087413	0.00712305	0.00501206
GOBP_DENDRITIC_SPINE_DEVELOPMENT	0.914805	1	0.891032	0.137445	0.309698	0.217916
GOBP_DENDRITIC_SPINE_MAINTENANCE	0.580774	1	0.891032	0.397267	0.625843	0.440367
GOBP_DENDRITIC_SPINE_MORPHOGENESIS	0.933997	1	0.891032	0.134572	0.305809	0.21518
GOBP_DENSE_CORE_GRANULE_TRANSPORT	1	1	1	0.0942319	0.238198	0.167605
GOBP_DENTATE_GYRUS_DEVELOPMENT	1	1	1	0.204863	0.407101	0.286452
GOBP_DEOXYRIBONUCLEOSIDE_MONOPHOSPHATE_METABOLIC_PROCESS	0.81783	1	0.891032	0.0354722	0.115689	0.0814031
GOBP_DEOXYRIBONUCLEOSIDE_TRIPHOSPHATE_METABOLIC_PROCESS	0.459037	1	0.891032	0.553951	0.771882	0.543127
GOBP_DEOXYRIBONUCLEOTIDE_BIOSYNTHETIC_PROCESS	0.425503	1	0.891032	0.518193	0.738578	0.519693
GOBP_DEOXYRIBONUCLEOTIDE_METABOLIC_PROCESS	0.537203	1	0.891032	0.0755339	0.207029	0.145673
GOBP_DEOXYRIBOSE_PHOSPHATE_BIOSYNTHETIC_PROCESS	0.319186	1	0.891032	0.400195	0.625843	0.440367
GOBP_DEOXYRIBOSE_PHOSPHATE_CATABOLIC_PROCESS	0.74277	1	0.891032	0.0766136	0.208881	0.146977
GOBP_DEPHOSPHORYLATION	0.873087	1	0.891032	0.124136	0.288144	0.20275
GOBP_DERMATAN_SULFATE_METABOLIC_PROCESS	1	1	1	0.0503847	0.149958	0.105517
GOBP_DERMATAN_SULFATE_PROTEOGLYCAN_METABOLIC_PROCESS	1	1	1	0.0978674	0.24292	0.170928
GOBP_DESMOSOME_ORGANIZATION	1	1	1	0.0942319	0.238198	0.167605
GOBP_DETECTION_OF_ABIOTIC_STIMULUS	0.999932	1	0.891032	0.763107	0.92874	0.653498
GOBP_DETECTION_OF_BIOTIC_STIMULUS	1	1	1	0.016356	0.0659624	0.0464137
GOBP_DETECTION_OF_CALCIUM_ION	0.728013	1	0.891032	0.789695	0.942866	0.663438
GOBP_DETECTION_OF_CHEMICAL_STIMULUS_INVOLVED_IN_SENSORY_PERCEPTION_OF_TASTE	1	1	1	0.713907	0.908371	0.639166
GOBP_DETECTION_OF_EXTERNAL_BIOTIC_STIMULUS	1	1	1	0.126692	0.291892	0.205387
GOBP_DETECTION_OF_LIGHT_STIMULUS	0.995591	1	0.891032	0.993796	1	0.703639
GOBP_DETECTION_OF_LIGHT_STIMULUS_INVOLVED_IN_SENSORY_PERCEPTION	1	1	1	0.919484	1	0.703639
GOBP_DETECTION_OF_MECHANICAL_STIMULUS	0.992648	1	0.891032	0.314835	0.541187	0.3808
GOBP_DETECTION_OF_MECHANICAL_STIMULUS_INVOLVED_IN_SENSORY_PERCEPTION	0.95951	1	0.891032	0.29165	0.527122	0.370903
GOBP_DETECTION_OF_MECHANICAL_STIMULUS_INVOLVED_IN_SENSORY_PERCEPTION_OF_PAIN	1	1	1	0.204863	0.407101	0.286452
GOBP_DETECTION_OF_MECHANICAL_STIMULUS_INVOLVED_IN_SENSORY_PERCEPTION_OF_SOUND	0.753944	1	0.891032	0.813473	0.951613	0.669592
GOBP_DETECTION_OF_MOLECULE_OF_BACTERIAL_ORIGIN	1	1	1	0.146065	0.318402	0.22404
GOBP_DETECTION_OF_OTHER_ORGANISM	1	1	1	0.159763	0.341386	0.240212
GOBP_DETECTION_OF_STIMULUS_INVOLVED_IN_SENSORY_PERCEPTION_OF_PAIN	1	1	1	0.126692	0.291892	0.205387
GOBP_DETECTION_OF_TEMPERATURE_STIMULUS	1	1	1	0.0250999	0.090344	0.0635696
GOBP_DETECTION_OF_TEMPERATURE_STIMULUS_INVOLVED_IN_SENSORY_PERCEPTION	1	1	1	0.117066	0.277425	0.195207
GOBP_DETERMINATION_OF_ADULT_LIFESPAN	0.835202	1	0.891032	0.332696	0.56613	0.398351
GOBP_DETOXIFICATION	0.999985	1	0.891032	3.56e-07	1.29e-05	9.1e-06
GOBP_DETOXIFICATION_OF_INORGANIC_COMPOUND	1	1	1	0.117066	0.277425	0.195207
GOBP_DEVELOPMENT_OF_PRIMARY_FEMALE_SEXUAL_CHARACTERISTICS	0.584104	1	0.891032	0.0772642	0.210408	0.148051
GOBP_DEVELOPMENT_OF_PRIMARY_SEXUAL_CHARACTERISTICS	0.958761	1	0.891032	0.011731	0.0510722	0.0359364
GOBP_DEVELOPMENTAL_CELL_GROWTH	0.967014	1	0.891032	0.00103028	0.00814078	0.00572817
GOBP_DEVELOPMENTAL_GROWTH_INVOLVED_IN_MORPHOGENESIS	0.971229	1	0.891032	2.13e-05	0.00035351	0.00024875
GOBP_DEVELOPMENTAL_INDUCTION	0.822813	1	0.891032	2.05e-05	0.00034171	0.00024044
GOBP_DEVELOPMENTAL_MATURATION	0.99975	1	0.891032	0.0105971	0.0477432	0.033594
GOBP_DEVELOPMENTAL_PIGMENTATION	0.614473	1	0.891032	0.224032	0.43882	0.308771
GOBP_DIACYLGLYCEROL_METABOLIC_PROCESS	0.70291	1	0.891032	0.791327	0.942866	0.663438
GOBP_DICARBOXYLIC_ACID_BIOSYNTHETIC_PROCESS	1	1	1	0.0644279	0.180958	0.127329
GOBP_DICARBOXYLIC_ACID_CATABOLIC_PROCESS	1	1	1	0.0354722	0.115689	0.0814031
GOBP_DICARBOXYLIC_ACID_METABOLIC_PROCESS	0.999935	1	0.891032	0.00211323	0.0137938	0.00970585
GOBP_DICARBOXYLIC_ACID_TRANSPORT	0.999912	1	0.891032	0.0304356	0.103166	0.0725919
GOBP_DIENCEPHALON_DEVELOPMENT	0.970743	1	0.891032	0.0999955	0.247674	0.174273
GOBP_DIET_INDUCED_THERMOGENESIS	1	1	1	1	1	1
GOBP_DIGESTION	0.999885	1	0.891032	8.04e-06	0.00015856	0.00011157
GOBP_DIGESTIVE_SYSTEM_DEVELOPMENT	0.999836	1	0.891032	0.0267968	0.0954538	0.067165
GOBP_DIGESTIVE_SYSTEM_PROCESS	0.996824	1	0.891032	9.27e-06	0.00017536	0.00012339
GOBP_DIGESTIVE_TRACT_MORPHOGENESIS	0.987854	1	0.891032	0.117307	0.277425	0.195207
GOBP_DIOL_BIOSYNTHETIC_PROCESS	1	1	1	0.728217	0.911992	0.641713
GOBP_DIOL_METABOLIC_PROCESS	1	1	1	0.224683	0.43882	0.308771
GOBP_DISACCHARIDE_METABOLIC_PROCESS	1	1	1	0.35784	0.587853	0.413636
GOBP_DISTAL_TUBULE_DEVELOPMENT	1	1	1	0.0382082	0.121462	0.0854656
GOBP_DIVALENT_INORGANIC_CATION_HOMEOSTASIS	1	1	0.891032	0.00011421	0.00142499	0.00100268
GOBP_DNA_BIOSYNTHETIC_PROCESS	1.75e-05	0.00035058	0.00031238	0.949198	1	0.703639
GOBP_DNA_CATABOLIC_PROCESS	0.981854	1	0.891032	0.845338	0.975503	0.686402
GOBP_DNA_CATABOLIC_PROCESS_ENDONUCLEOLYTIC	0.955239	1	0.891032	1	1	1
GOBP_DNA_CONFORMATION_CHANGE	0.0171505	0.139765	0.124535	1	1	0.703639
GOBP_DNA_CYTOSINE_DEAMINATION	1	1	1	0.0942319	0.238198	0.167605
GOBP_DNA_DAMAGE_RESPONSE_DETECTION_OF_DNA_DAMAGE	0.162367	0.774794	0.690366	0.990732	1	0.703639
GOBP_DNA_DAMAGE_RESPONSE_SIGNAL_TRANSDUCTION_BY_P53_CLASS_MEDIATOR	0.207844	0.919545	0.819344	0.308837	0.541187	0.3808
GOBP_DNA_DAMAGE_RESPONSE_SIGNAL_TRANSDUCTION_RESULTING_IN_TRANSCRIPTION	0.52251	1	0.891032	0.332696	0.56613	0.398351
GOBP_DNA_DEALKYLATION	0.219058	0.9415	0.838907	0.755368	0.928713	0.653479
GOBP_DNA_DEALKYLATION_INVOLVED_IN_DNA_REPAIR	0.245616	0.991976	0.883883	1	1	1
GOBP_DNA_DEAMINATION	0.0377606	0.263763	0.235022	0.204863	0.407101	0.286452
GOBP_DNA_DEMETHYLATION	0.506769	1	0.891032	0.627433	0.839342	0.590594
GOBP_DNA_DEPENDENT_DNA_REPLICATION	0.165712	0.777612	0.692877	0.99995	1	0.703639
GOBP_DNA_DEPENDENT_DNA_REPLICATION_MAINTENANCE_OF_FIDELITY	0.0901948	0.516173	0.459927	0.979774	1	0.703639
GOBP_DNA_DOUBLE_STRAND_BREAK_PROCESSING	0.430509	1	0.891032	1	1	1
GOBP_DNA_GEOMETRIC_CHANGE	0.0111752	0.0969464	0.0863823	0.999865	1	0.703639
GOBP_DNA_INTEGRATION	0.0622318	0.38098	0.339466	1	1	1
GOBP_DNA_INTEGRITY_CHECKPOINT	0.00034218	0.00468478	0.00417429	0.971527	1	0.703639
GOBP_DNA_LIGATION	0.425503	1	0.891032	1	1	1
GOBP_DNA_METHYLATION	0.174045	0.79621	0.709448	0.998708	1	0.703639
GOBP_DNA_METHYLATION_DEPENDENT_HETEROCHROMATIN_ASSEMBLY	0.580774	1	0.891032	1	1	1
GOBP_DNA_METHYLATION_INVOLVED_IN_GAMETE_GENERATION	0.850918	1	0.891032	1	1	1
GOBP_DNA_METHYLATION_OR_DEMETHYLATION	0.231719	0.987577	0.879963	0.990294	1	0.703639
GOBP_DNA_MODIFICATION	0.0202826	0.162131	0.144464	0.998554	1	0.703639
GOBP_DNA_PACKAGING	0.349361	1	0.891032	0.999998	1	0.703639
GOBP_DNA_RECOMBINATION	1.51e-07	4.47e-06	3.98e-06	0.999992	1	0.703639
GOBP_DNA_REPLICATION	0.00209375	0.0228492	0.0203594	0.999999	1	0.703639
GOBP_DNA_REPLICATION_CHECKPOINT	0.4914	1	0.891032	1	1	1
GOBP_DNA_REPLICATION_DEPENDENT_NUCLEOSOME_ORGANIZATION	0.95951	1	0.891032	1	1	1
GOBP_DNA_REPLICATION_INDEPENDENT_NUCLEOSOME_ORGANIZATION	0.0117099	0.100657	0.089689	1	1	1
GOBP_DNA_REPLICATION_INITIATION	0.332131	1	0.891032	0.991781	1	0.703639
GOBP_DNA_STRAND_ELONGATION	0.926096	1	0.891032	1	1	1
GOBP_DNA_STRAND_ELONGATION_INVOLVED_IN_DNA_REPLICATION	1	1	1	1	1	1
GOBP_DNA_SYNTHESIS_INVOLVED_IN_DNA_REPAIR	0.127641	0.657413	0.585776	0.998278	1	0.703639
GOBP_DNA_TEMPLATED_TRANSCRIPTION_ELONGATION	9.14e-16	1.01e-13	9.02e-14	1	1	1
GOBP_DNA_TEMPLATED_TRANSCRIPTION_INITIATION	2.85e-13	2.04e-11	1.81e-11	0.996791	1	0.703639
GOBP_DNA_TEMPLATED_TRANSCRIPTION_TERMINATION	7.69e-11	3.76e-09	3.35e-09	1	1	1
GOBP_DNA_UNWINDING_INVOLVED_IN_DNA_REPLICATION	1	1	1	1	1	1
GOBP_DOPAMINE_BIOSYNTHETIC_PROCESS	1	1	1	0.732662	0.911992	0.641713
GOBP_DOPAMINE_METABOLIC_PROCESS	1	1	1	0.25464	0.478633	0.336785
GOBP_DOPAMINE_RECEPTOR_SIGNALING_PATHWAY	0.332131	1	0.891032	0.47754	0.705096	0.496133
GOBP_DOPAMINE_SECRETION	0.835852	1	0.891032	0.521004	0.738578	0.519693
GOBP_DOPAMINE_TRANSPORT	0.946406	1	0.891032	0.441514	0.668447	0.470345
GOBP_DOPAMINERGIC_NEURON_DIFFERENTIATION	0.879738	1	0.891032	0.00051659	0.00479883	0.00337665
GOBP_DORSAL_AORTA_DEVELOPMENT	0.632654	1	0.891032	0.314433	0.541187	0.3808
GOBP_DORSAL_SPINAL_CORD_DEVELOPMENT	1	1	1	0.649617	0.860608	0.605558
GOBP_DORSAL_VENTRAL_NEURAL_TUBE_PATTERNING	0.296158	1	0.891032	1	1	1
GOBP_DORSAL_VENTRAL_PATTERN_FORMATION	0.943399	1	0.891032	0.370414	0.598578	0.421183
GOBP_DOSAGE_COMPENSATION	0.835202	1	0.891032	1	1	1
GOBP_DOUBLE_STRAND_BREAK_REPAIR	6.19e-06	0.0001405	0.00012519	1	1	0.703639
GOBP_DOUBLE_STRAND_BREAK_REPAIR_VIA_BREAK_INDUCED_REPLICATION	0.699351	1	0.891032	1	1	1
GOBP_DRUG_CATABOLIC_PROCESS	1	1	1	0.791327	0.942866	0.663438
GOBP_DRUG_METABOLIC_PROCESS	1	1	1	0.241472	0.458699	0.322759
GOBP_DRUG_TRANSMEMBRANE_TRANSPORT	0.632654	1	0.891032	0.0942319	0.238198	0.167605
GOBP_DRUG_TRANSPORT	0.699351	1	0.891032	0.146065	0.318402	0.22404
GOBP_EAR_DEVELOPMENT	0.999931	1	0.891032	1.3e-05	0.00023504	0.00016538
GOBP_EAR_MORPHOGENESIS	0.994643	1	0.891032	0.0011014	0.00855742	0.00602134
GOBP_EATING_BEHAVIOR	1	1	1	0.868066	0.985721	0.693592
GOBP_ECTODERM_DEVELOPMENT	0.269188	1	0.891032	0.649617	0.860608	0.605558
GOBP_ECTODERMAL_PLACODE_FORMATION	0.66767	1	0.891032	0.35784	0.587853	0.413636
GOBP_ELASTIC_FIBER_ASSEMBLY	1	1	1	2.05e-05	0.00034171	0.00024044
GOBP_ELECTRON_TRANSPORT_CHAIN	7.8e-14	5.99e-12	5.34e-12	0.102695	0.253148	0.178125
GOBP_EMBRYO_IMPLANTATION	0.99335	1	0.891032	0.00299438	0.0178665	0.0125716
GOBP_EMBRYONIC_APPENDAGE_MORPHOGENESIS	0.84818	1	0.891032	9.89e-05	0.00126844	0.00089252
GOBP_EMBRYONIC_AXIS_SPECIFICATION	0.452841	1	0.891032	0.789252	0.942866	0.663438
GOBP_EMBRYONIC_BODY_MORPHOGENESIS	1	1	1	0.119101	0.277425	0.195207
GOBP_EMBRYONIC_BRAIN_DEVELOPMENT	1	1	1	0.314433	0.541187	0.3808
GOBP_EMBRYONIC_CAMERA_TYPE_EYE_DEVELOPMENT	0.386455	1	0.891032	0.00264989	0.0164874	0.0116012
GOBP_EMBRYONIC_CAMERA_TYPE_EYE_FORMATION	0.66767	1	0.891032	0.00470779	0.0256629	0.0180574
GOBP_EMBRYONIC_CAMERA_TYPE_EYE_MORPHOGENESIS	0.190181	0.856672	0.763322	0.0142011	0.0599683	0.0421961
GOBP_EMBRYONIC_CRANIAL_SKELETON_MORPHOGENESIS	0.989014	1	0.891032	0.241472	0.458699	0.322759
GOBP_EMBRYONIC_DIGESTIVE_TRACT_DEVELOPMENT	0.808851	1	0.891032	0.00586694	0.0305422	0.0214907
GOBP_EMBRYONIC_DIGESTIVE_TRACT_MORPHOGENESIS	1	1	1	0.553951	0.771882	0.543127
GOBP_EMBRYONIC_DIGIT_MORPHOGENESIS	0.72875	1	0.891032	0.00996143	0.0454961	0.0320128
GOBP_EMBRYONIC_EYE_MORPHOGENESIS	0.364029	1	0.891032	0.00735984	0.0360555	0.02537
GOBP_EMBRYONIC_FORELIMB_MORPHOGENESIS	0.945296	1	0.891032	0.0389222	0.122394	0.0861215
GOBP_EMBRYONIC_HEART_TUBE_DEVELOPMENT	0.468489	1	0.891032	0.792465	0.943739	0.664052
GOBP_EMBRYONIC_HEART_TUBE_MORPHOGENESIS	0.334535	1	0.891032	0.806281	0.951613	0.669592
GOBP_EMBRYONIC_HEMOPOIESIS	0.900163	1	0.891032	0.93667	1	0.703639
GOBP_EMBRYONIC_HINDLIMB_MORPHOGENESIS	0.74277	1	0.891032	0.0766136	0.208881	0.146977
GOBP_EMBRYONIC_ORGAN_DEVELOPMENT	0.988124	1	0.891032	0.00215819	0.0140675	0.00989847
GOBP_EMBRYONIC_ORGAN_MORPHOGENESIS	0.98404	1	0.891032	0.00479525	0.0258147	0.0181642
GOBP_EMBRYONIC_PATTERN_SPECIFICATION	0.754094	1	0.891032	0.45546	0.685104	0.482066
GOBP_EMBRYONIC_PLACENTA_DEVELOPMENT	0.950467	1	0.891032	0.542231	0.764802	0.538145
GOBP_EMBRYONIC_PLACENTA_MORPHOGENESIS	1	1	1	0.284196	0.516458	0.3634
GOBP_EMBRYONIC_SKELETAL_JOINT_DEVELOPMENT	1	1	1	0.0644279	0.180958	0.127329
GOBP_EMBRYONIC_SKELETAL_JOINT_MORPHOGENESIS	1	1	1	0.314433	0.541187	0.3808
GOBP_EMBRYONIC_SKELETAL_SYSTEM_DEVELOPMENT	0.999895	1	0.891032	0.00265356	0.0164882	0.0116018
GOBP_EMBRYONIC_SKELETAL_SYSTEM_MORPHOGENESIS	0.999881	1	0.891032	0.022745	0.0842125	0.0592552
GOBP_EMBRYONIC_VISCEROCRANIUM_MORPHOGENESIS	1	1	1	0.314433	0.541187	0.3808
GOBP_ENAMEL_MINERALIZATION	1	1	1	0.553951	0.771882	0.543127
GOBP_ENDOCARDIAL_CUSHION_DEVELOPMENT	0.985154	1	0.891032	0.00575897	0.0300811	0.0211662
GOBP_ENDOCARDIAL_CUSHION_FORMATION	1	1	1	0.0142011	0.0599683	0.0421961
GOBP_ENDOCARDIAL_CUSHION_MORPHOGENESIS	0.963375	1	0.891032	0.00912607	0.0427291	0.0300659
GOBP_ENDOCARDIUM_DEVELOPMENT	1	1	1	0.732662	0.911992	0.641713
GOBP_ENDOCHONDRAL_BONE_MORPHOGENESIS	0.964678	1	0.891032	0.00146481	0.0106188	0.00747178
GOBP_ENDOCRINE_HORMONE_SECRETION	0.989014	1	0.891032	0.129354	0.297143	0.209081
GOBP_ENDOCRINE_PANCREAS_DEVELOPMENT	0.815641	1	0.891032	0.399547	0.625843	0.440367
GOBP_ENDOCRINE_PROCESS	0.99631	1	0.891032	0.00229401	0.0147259	0.0103617
GOBP_ENDOCRINE_SYSTEM_DEVELOPMENT	0.992607	1	0.891032	0.143712	0.318402	0.22404
GOBP_ENDOCYTIC_RECYCLING	0.0064895	0.0613894	0.0546999	0.99753	1	0.703639
GOBP_ENDODERM_DEVELOPMENT	0.93953	1	0.891032	0.00021918	0.00242868	0.00170892
GOBP_ENDODERM_FORMATION	0.756291	1	0.891032	2.49e-06	6.41e-05	4.51e-05
GOBP_ENDODERMAL_CELL_DIFFERENTIATION	0.614473	1	0.891032	8.05e-08	3.57e-06	2.51e-06
GOBP_ENDODERMAL_CELL_FATE_COMMITMENT	0.119968	0.627333	0.558974	0.789695	0.942866	0.663438
GOBP_ENDOMEMBRANE_SYSTEM_ORGANIZATION	0.118029	0.625008	0.556903	0.988078	1	0.703639
GOBP_ENDONUCLEOLYTIC_CLEAVAGE_INVOLVED_IN_RRNA_PROCESSING	0.0103756	0.0914852	0.0815163	1	1	1
GOBP_ENDOPLASMIC_RETICULUM_CALCIUM_ION_HOMEOSTASIS	0.70291	1	0.891032	0.548268	0.767641	0.540142
GOBP_ENDOPLASMIC_RETICULUM_LOCALIZATION	1	1	1	1	1	1
GOBP_ENDOPLASMIC_RETICULUM_MANNOSE_TRIMMING	4.27e-05	0.00074009	0.00065945	1	1	1
GOBP_ENDOPLASMIC_RETICULUM_ORGANIZATION	0.0631296	0.385224	0.343247	0.972265	1	0.703639
GOBP_ENDOPLASMIC_RETICULUM_TO_CYTOSOL_TRANSPORT	0.0036451	0.0362105	0.0322648	0.965256	1	0.703639
GOBP_ENDOPLASMIC_RETICULUM_TO_GOLGI_VESICLE_MEDIATED_TRANSPORT	1.65e-06	4.24e-05	3.78e-05	0.999636	1	0.703639
GOBP_ENDOPLASMIC_RETICULUM_TUBULAR_NETWORK_ORGANIZATION	1	1	1	0.61967	0.831347	0.584968
GOBP_ENDOPLASMIC_RETICULUM_UNFOLDED_PROTEIN_RESPONSE	0.031914	0.231515	0.206287	0.957689	1	0.703639
GOBP_ENDOSOMAL_TRANSPORT	0.0139055	0.117312	0.104529	0.999981	1	0.703639
GOBP_ENDOSOME_ORGANIZATION	0.351832	1	0.891032	0.984302	1	0.703639
GOBP_ENDOSOME_TO_LYSOSOME_TRANSPORT	0.0612137	0.38098	0.339466	0.947881	1	0.703639
GOBP_ENDOSOME_TO_PLASMA_MEMBRANE_PROTEIN_TRANSPORT	0.39091	1	0.891032	1	1	1
GOBP_ENDOSOME_TRANSPORT_VIA_MULTIVESICULAR_BODY_SORTING_PATHWAY	0.577348	1	0.891032	1	1	1
GOBP_ENDOTHELIAL_CELL_ACTIVATION	1	1	1	0.400195	0.625843	0.440367
GOBP_ENDOTHELIAL_CELL_APOPTOTIC_PROCESS	0.950657	1	0.891032	0.0109236	0.0486027	0.0341988
GOBP_ENDOTHELIAL_CELL_CHEMOTAXIS	0.95951	1	0.891032	0.00205174	0.0135597	0.00954111
GOBP_ENDOTHELIAL_CELL_DEVELOPMENT	0.998667	1	0.891032	0.00230576	0.0147723	0.0103944
GOBP_ENDOTHELIAL_CELL_MIGRATION	0.999879	1	0.891032	2.34e-07	8.76e-06	6.17e-06
GOBP_ENDOTHELIAL_CELL_MORPHOGENESIS	1	1	1	0.0503847	0.149958	0.105517
GOBP_ENDOTHELIAL_CELL_PROLIFERATION	0.998311	1	0.891032	6.81e-06	0.00014082	9.91e-05
GOBP_ENDOTHELIUM_DEVELOPMENT	0.999874	1	0.891032	1.8e-05	0.00030771	0.00021652
GOBP_ENERGY_DERIVATION_BY_OXIDATION_OF_ORGANIC_COMPOUNDS	1.68e-11	9.17e-10	8.17e-10	0.975358	1	0.703639
GOBP_ENERGY_HOMEOSTASIS	0.859354	1	0.891032	0.772828	0.936407	0.658893
GOBP_ENERGY_RESERVE_METABOLIC_PROCESS	0.847715	1	0.891032	0.062474	0.178158	0.125359
GOBP_ENGULFMENT_OF_APOPTOTIC_CELL	0.269188	1	0.891032	0.36512	0.59217	0.416674
GOBP_ENSHEATHMENT_OF_NEURONS	0.984077	1	0.891032	0.00706019	0.0352177	0.0247806
GOBP_ENTERIC_NERVOUS_SYSTEM_DEVELOPMENT	1	1	1	0.518193	0.738578	0.519693
GOBP_ENTEROENDOCRINE_CELL_DIFFERENTIATION	0.506769	1	0.891032	0.627433	0.839342	0.590594
GOBP_ENTRAINMENT_OF_CIRCADIAN_CLOCK	0.408774	1	0.891032	0.9831	1	0.703639
GOBP_ENTRY_INTO_HOST	0.992622	1	0.891032	0.00086625	0.00709777	0.00499427
GOBP_ENTRY_OF_BACTERIUM_INTO_HOST_CELL	0.166056	0.777612	0.692877	0.236007	0.449879	0.316552
GOBP_EOSINOPHIL_CHEMOTAXIS	1	1	1	0.0446818	0.137547	0.0967838
GOBP_EOSINOPHIL_MIGRATION	1	1	1	0.00855509	0.0403398	0.0283847
GOBP_EPHRIN_RECEPTOR_SIGNALING_PATHWAY	0.114857	0.616009	0.548884	0.769718	0.935807	0.65847
GOBP_EPIBOLY	0.859354	1	0.891032	0.0135951	0.0580473	0.0408444
GOBP_EPIDERMAL_CELL_DIFFERENTIATION	1	1	0.891032	0.00130564	0.00969134	0.00681921
GOBP_EPIDERMAL_GROWTH_FACTOR_RECEPTOR_SIGNALING_PATHWAY	0.95496	1	0.891032	0.0599397	0.172304	0.12124
GOBP_EPIDERMIS_DEVELOPMENT	1	1	0.891032	5.88e-07	1.98e-05	1.4e-05
GOBP_EPIDERMIS_MORPHOGENESIS	0.808851	1	0.891032	0.00156725	0.0111319	0.00783285
GOBP_EPITHELIAL_CELL_APOPTOTIC_PROCESS	0.999233	1	0.891032	0.019433	0.0752815	0.052971
GOBP_EPITHELIAL_CELL_CELL_ADHESION	0.81783	1	0.891032	0.0354722	0.115689	0.0814031
GOBP_EPITHELIAL_CELL_DEVELOPMENT	0.999953	1	0.891032	1.1e-05	0.00020432	0.00014377
GOBP_EPITHELIAL_CELL_DIFFERENTIATION_INVOLVED_IN_KIDNEY_DEVELOPMENT	0.991871	1	0.891032	0.0020173	0.0134506	0.00946434
GOBP_EPITHELIAL_CELL_DIFFERENTIATION_INVOLVED_IN_PROSTATE_GLAND_DEVELOPMENT	0.632654	1	0.891032	0.698587	0.894668	0.629523
GOBP_EPITHELIAL_CELL_FATE_COMMITMENT	1	1	1	0.236007	0.449879	0.316552
GOBP_EPITHELIAL_CELL_MATURATION	0.777404	1	0.891032	0.0802841	0.213754	0.150406
GOBP_EPITHELIAL_CELL_MORPHOGENESIS	1	1	1	0.00156725	0.0111319	0.00783285
GOBP_EPITHELIAL_CELL_PROLIFERATION	0.999947	1	0.891032	4.12e-12	6.61e-10	4.65e-10
GOBP_EPITHELIAL_CILIUM_MOVEMENT_INVOLVED_IN_DETERMINATION_OF_LEFT_RIGHT_ASYMMETRY	0.245616	0.991976	0.883883	0.698587	0.894668	0.629523
GOBP_EPITHELIAL_FLUID_TRANSPORT	1	1	1	0.0942319	0.238198	0.167605
GOBP_EPITHELIAL_STRUCTURE_MAINTENANCE	0.777956	1	0.891032	0.00358698	0.0208412	0.0146647
GOBP_EPITHELIAL_TO_MESENCHYMAL_TRANSITION	0.999243	1	0.891032	5.21e-06	0.00011543	8.12e-05
GOBP_EPITHELIAL_TO_MESENCHYMAL_TRANSITION_INVOLVED_IN_ENDOCARDIAL_CUSHION_FORMATION	1	1	1	0.267886	0.49345	0.347211
GOBP_EPITHELIAL_TUBE_BRANCHING_INVOLVED_IN_LUNG_MORPHOGENESIS	0.933147	1	0.891032	0.0270052	0.0954538	0.067165
GOBP_EPITHELIAL_TUBE_FORMATION	0.763463	1	0.891032	0.0124157	0.0534958	0.0376417
GOBP_EPITHELIAL_TUBE_MORPHOGENESIS	0.916432	1	0.891032	4.79e-07	1.67e-05	1.17e-05
GOBP_EPOXYGENASE_P450_PATHWAY	1	1	1	0.182956	0.374111	0.26324
GOBP_ER_ASSOCIATED_MISFOLDED_PROTEIN_CATABOLIC_PROCESS	0.0990017	0.549577	0.489691	1	1	1
GOBP_ER_NUCLEUS_SIGNALING_PATHWAY	0.577547	1	0.891032	0.863826	0.983907	0.692316
GOBP_ER_OVERLOAD_RESPONSE	1	1	1	0.762886	0.928713	0.653479
GOBP_ERAD_PATHWAY	0.00121309	0.0142727	0.0127174	0.947685	1	0.703639
GOBP_ERBB_SIGNALING_PATHWAY	0.987774	1	0.891032	0.0585169	0.168771	0.118754
GOBP_ERBB2_SIGNALING_PATHWAY	1	1	1	0.496002	0.720922	0.507269
GOBP_ERK1_AND_ERK2_CASCADE	0.999993	1	0.891032	1.29e-05	0.00023392	0.00016459
GOBP_ERROR_FREE_TRANSLESION_SYNTHESIS	0.052154	0.336666	0.29998	1	1	1
GOBP_ERROR_PRONE_TRANSLESION_SYNTHESIS	0.0114683	0.0988061	0.0880394	1	1	1
GOBP_ERYTHROCYTE_DEVELOPMENT	0.599416	1	0.891032	0.71722	0.910513	0.640673
GOBP_ERYTHROCYTE_HOMEOSTASIS	0.261524	1	0.891032	0.290064	0.526095	0.370181
GOBP_ERYTHROCYTE_MATURATION	0.753944	1	0.891032	0.813473	0.951613	0.669592
GOBP_ESCRT_COMPLEX_DISASSEMBLY	1	1	1	1	1	1
GOBP_ESTABLISHMENT_OF_CELL_POLARITY	0.76671	1	0.891032	0.283861	0.516458	0.3634
GOBP_ESTABLISHMENT_OF_ENDOTHELIAL_BARRIER	0.991871	1	0.891032	0.0161934	0.0656481	0.0461926
GOBP_ESTABLISHMENT_OF_ENDOTHELIAL_INTESTINAL_BARRIER	1	1	1	0.0382082	0.121462	0.0854656
GOBP_ESTABLISHMENT_OF_EPITHELIAL_CELL_APICAL_BASAL_POLARITY	0.166056	0.777612	0.692877	0.236007	0.449879	0.316552
GOBP_ESTABLISHMENT_OF_EPITHELIAL_CELL_POLARITY	0.530992	1	0.891032	0.224683	0.43882	0.308771
GOBP_ESTABLISHMENT_OF_LYMPHOCYTE_POLARITY	1	1	1	0.174769	0.362791	0.255274
GOBP_ESTABLISHMENT_OF_MITOCHONDRION_LOCALIZATION	0.918302	1	0.891032	0.310809	0.541187	0.3808
GOBP_ESTABLISHMENT_OF_MITOTIC_SPINDLE_LOCALIZATION	0.201441	0.896483	0.798795	0.314734	0.541187	0.3808
GOBP_ESTABLISHMENT_OF_MITOTIC_SPINDLE_ORIENTATION	0.12207	0.632178	0.563291	0.391385	0.625843	0.440367
GOBP_ESTABLISHMENT_OF_ORGANELLE_LOCALIZATION	0.0104185	0.0916491	0.0816623	0.383992	0.617737	0.434664
GOBP_ESTABLISHMENT_OF_PIGMENT_GRANULE_LOCALIZATION	0.0719734	0.432185	0.38509	0.284196	0.516458	0.3634
GOBP_ESTABLISHMENT_OF_PLANAR_POLARITY_INVOLVED_IN_NEURAL_TUBE_CLOSURE	0.0990017	0.549577	0.489691	0.0382082	0.121462	0.0854656
GOBP_ESTABLISHMENT_OF_PLANAR_POLARITY_OF_EMBRYONIC_EPITHELIUM	0.142388	0.705384	0.62852	0.0644279	0.180958	0.127329
GOBP_ESTABLISHMENT_OF_PROTEIN_LOCALIZATION_TO_CHROMOSOME	2.93e-08	1.01e-06	9.01e-07	1	1	1
GOBP_ESTABLISHMENT_OF_PROTEIN_LOCALIZATION_TO_ENDOPLASMIC_RETICULUM	7.2e-13	4.52e-11	4.03e-11	0.999992	1	0.703639
GOBP_ESTABLISHMENT_OF_PROTEIN_LOCALIZATION_TO_MEMBRANE	7.15e-13	4.52e-11	4.03e-11	0.999984	1	0.703639
GOBP_ESTABLISHMENT_OF_PROTEIN_LOCALIZATION_TO_MITOCHONDRIAL_MEMBRANE	0.0612137	0.38098	0.339466	0.947881	1	0.703639
GOBP_ESTABLISHMENT_OF_PROTEIN_LOCALIZATION_TO_PLASMA_MEMBRANE	0.105043	0.573594	0.511091	0.969465	1	0.703639
GOBP_ESTABLISHMENT_OF_PROTEIN_LOCALIZATION_TO_POSTSYNAPTIC_MEMBRANE	0.777404	1	0.891032	0.518193	0.738578	0.519693
GOBP_ESTABLISHMENT_OF_PROTEIN_LOCALIZATION_TO_TELOMERE	9.62e-08	3.07e-06	2.73e-06	1	1	1
GOBP_ESTABLISHMENT_OF_PROTEIN_LOCALIZATION_TO_VACUOLE	0.117614	0.623687	0.555725	0.998058	1	0.703639
GOBP_ESTABLISHMENT_OF_RNA_LOCALIZATION	3.84e-11	2.01e-09	1.79e-09	1	1	0.703639
GOBP_ESTABLISHMENT_OF_SISTER_CHROMATID_COHESION	0.632654	1	0.891032	1	1	1
GOBP_ESTABLISHMENT_OF_SPINDLE_ORIENTATION	0.219058	0.9415	0.838907	0.545399	0.765929	0.538938
GOBP_ESTABLISHMENT_OF_TISSUE_POLARITY	6.1e-12	3.59e-10	3.2e-10	0.313294	0.541187	0.3808
GOBP_ESTABLISHMENT_OR_MAINTENANCE_OF_BIPOLAR_CELL_POLARITY	0.429824	1	0.891032	0.585698	0.801273	0.563807
GOBP_ESTABLISHMENT_OR_MAINTENANCE_OF_CELL_POLARITY	0.730999	1	0.891032	0.115034	0.277394	0.195185
GOBP_ESTABLISHMENT_OR_MAINTENANCE_OF_MONOPOLAR_CELL_POLARITY	0.377373	1	0.891032	0.109986	0.26674	0.187688
GOBP_ESTABLISHMENT_OR_MAINTENANCE_OF_TRANSMEMBRANE_ELECTROCHEMICAL_GRADIENT	1	1	1	1	1	1
GOBP_ESTROGEN_BIOSYNTHETIC_PROCESS	1	1	1	0.174769	0.362791	0.255274
GOBP_ESTROGEN_METABOLIC_PROCESS	1	1	1	0.023071	0.0845454	0.0594894
GOBP_ESTROUS_CYCLE	1	1	1	0.0382082	0.121462	0.0854656
GOBP_ETHANOL_CATABOLIC_PROCESS	1	1	1	0.00175072	0.0120352	0.00846846
GOBP_ETHANOL_METABOLIC_PROCESS	1	1	1	5.93e-05	0.0008418	0.00059233
GOBP_ETHANOL_OXIDATION	1	1	1	0.00104196	0.00819132	0.00576373
GOBP_ETHER_BIOSYNTHETIC_PROCESS	1	1	1	0.00470779	0.0256629	0.0180574
GOBP_ETHER_METABOLIC_PROCESS	1	1	1	0.00629868	0.0320022	0.022518
GOBP_EXCITATORY_SYNAPSE_ASSEMBLY	0.926096	1	0.891032	0.163259	0.346236	0.243625
GOBP_EXCRETION	0.982119	1	0.891032	0.524272	0.741855	0.521998
GOBP_EXECUTION_PHASE_OF_APOPTOSIS	0.952079	1	0.891032	0.995474	1	0.703639
GOBP_EXIT_FROM_MITOSIS	0.12207	0.632178	0.563291	0.965256	1	0.703639
GOBP_EXOCRINE_SYSTEM_DEVELOPMENT	0.912551	1	0.891032	0.00143495	0.0104348	0.00734233
GOBP_EXOCYTIC_PROCESS	0.0648192	0.394256	0.351295	0.166261	0.351878	0.247595
GOBP_EXPLORATION_BEHAVIOR	1	1	1	0.159763	0.341386	0.240212
GOBP_EXPORT_ACROSS_PLASMA_MEMBRANE	0.997564	1	0.891032	0.366129	0.592683	0.417035
GOBP_EXTERNAL_ENCAPSULATING_STRUCTURE_ORGANIZATION	1	1	0.891032	9.8e-43	4.56e-39	3.21e-39
GOBP_EXTRACELLULAR_MATRIX_ASSEMBLY	1	1	1	5.07e-11	5.48e-09	3.86e-09
GOBP_EXTRACELLULAR_MATRIX_CONSTITUENT_SECRETION	0.699351	1	0.891032	0.400195	0.625843	0.440367
GOBP_EXTRACELLULAR_MATRIX_DISASSEMBLY	0.986482	1	0.891032	2.78e-08	1.44e-06	1.01e-06
GOBP_EXTRACELLULAR_REGULATION_OF_SIGNAL_TRANSDUCTION	1	1	1	0.400195	0.625843	0.440367
GOBP_EXTRACELLULAR_TRANSPORT	0.859354	1	0.891032	0.772828	0.936407	0.658893
GOBP_EXTRACELLULAR_VESICLE_BIOGENESIS	0.151546	0.737134	0.656811	0.728217	0.911992	0.641713
GOBP_EXTRINSIC_APOPTOTIC_SIGNALING_PATHWAY	0.958761	1	0.891032	0.011731	0.0510722	0.0359364
GOBP_EXTRINSIC_APOPTOTIC_SIGNALING_PATHWAY_VIA_DEATH_DOMAIN_RECEPTORS	0.699804	1	0.891032	0.349318	0.586694	0.412821
GOBP_EYE_MORPHOGENESIS	0.986161	1	0.891032	0.00010997	0.00137999	0.00097102
GOBP_EYE_PHOTORECEPTOR_CELL_DEVELOPMENT	0.822813	1	0.891032	0.71722	0.910513	0.640673
GOBP_EYE_PHOTORECEPTOR_CELL_DIFFERENTIATION	0.925612	1	0.891032	0.105889	0.259509	0.182601
GOBP_EYELID_DEVELOPMENT_IN_CAMERA_TYPE_EYE	0.66767	1	0.891032	0.119101	0.277425	0.195207
GOBP_FACE_DEVELOPMENT	0.614473	1	0.891032	0.00083458	0.00688676	0.0048458
GOBP_FACIAL_NERVE_MORPHOGENESIS	1	1	1	0.314433	0.541187	0.3808
GOBP_FAT_CELL_DIFFERENTIATION	0.981395	1	0.891032	0.0383019	0.121511	0.0855002
GOBP_FAT_SOLUBLE_VITAMIN_BIOSYNTHETIC_PROCESS	0.728013	1	0.891032	0.441182	0.668447	0.470345
GOBP_FAT_SOLUBLE_VITAMIN_METABOLIC_PROCESS	0.989014	1	0.891032	0.00996062	0.0454961	0.0320128
GOBP_FATTY_ACID_BETA_OXIDATION	0.935421	1	0.891032	0.62302	0.835361	0.587793
GOBP_FATTY_ACID_BETA_OXIDATION_USING_ACYL_COA_DEHYDROGENASE	1	1	1	0.732662	0.911992	0.641713
GOBP_FATTY_ACID_BETA_OXIDATION_USING_ACYL_COA_OXIDASE	1	1	1	0.518193	0.738578	0.519693
GOBP_FATTY_ACID_BIOSYNTHETIC_PROCESS	1	1	0.891032	0.00024067	0.00264173	0.00185882
GOBP_FATTY_ACID_CATABOLIC_PROCESS	0.992763	1	0.891032	0.542801	0.764802	0.538145
GOBP_FATTY_ACID_DERIVATIVE_BIOSYNTHETIC_PROCESS	0.998008	1	0.891032	0.00037687	0.00370814	0.00260919
GOBP_FATTY_ACID_DERIVATIVE_CATABOLIC_PROCESS	1	1	1	0.267886	0.49345	0.347211
GOBP_FATTY_ACID_DERIVATIVE_METABOLIC_PROCESS	0.997419	1	0.891032	0.00064316	0.00566906	0.00398897
GOBP_FATTY_ACID_ELONGATION	1	1	1	0.441182	0.668447	0.470345
GOBP_FATTY_ACID_HOMEOSTASIS	0.81783	1	0.891032	0.587784	0.801273	0.563807
GOBP_FATTY_ACID_METABOLIC_PROCESS	1	1	0.891032	3.95e-07	1.41e-05	9.95e-06
GOBP_FATTY_ACID_TRANSMEMBRANE_TRANSPORT	0.867412	1	0.891032	0.333816	0.567001	0.398964
GOBP_FATTY_ACID_TRANSPORT	0.999774	1	0.891032	0.00012249	0.00151619	0.00106685
GOBP_FATTY_ACYL_COA_BIOSYNTHETIC_PROCESS	0.955239	1	0.891032	0.130272	0.297624	0.20942
GOBP_FATTY_ACYL_COA_METABOLIC_PROCESS	0.91933	1	0.891032	0.0951144	0.23889	0.168092
GOBP_FC_EPSILON_RECEPTOR_SIGNALING_PATHWAY	2.69e-06	6.67e-05	5.94e-05	0.950072	1	0.703639
GOBP_FC_RECEPTOR_MEDIATED_STIMULATORY_SIGNALING_PATHWAY	0.969922	1	0.891032	0.361343	0.590887	0.415771
GOBP_FC_RECEPTOR_SIGNALING_PATHWAY	3.01e-05	0.00056119	0.00050004	0.439974	0.668447	0.470345
GOBP_FEAR_RESPONSE	1	1	1	0.804677	0.951613	0.669592
GOBP_FEEDING_BEHAVIOR	1	1	1	0.614977	0.829355	0.583566
GOBP_FEMALE_GAMETE_GENERATION	0.971522	1	0.891032	0.410057	0.638951	0.449591
GOBP_FEMALE_GENITALIA_DEVELOPMENT	1	1	1	0.0978674	0.24292	0.170928
GOBP_FEMALE_MEIOTIC_NUCLEAR_DIVISION	0.481909	1	0.891032	0.825865	0.962337	0.677138
GOBP_FEMALE_SEX_DIFFERENTIATION	0.741669	1	0.891032	0.0423094	0.131976	0.0928634
GOBP_FERTILIZATION	0.996308	1	0.891032	0.933676	1	0.703639
GOBP_FEVER_GENERATION	1	1	1	0.00028952	0.00302118	0.00212582
GOBP_FIBRINOLYSIS	0.70291	1	0.891032	0.0178449	0.0709829	0.0499464
GOBP_FIBROBLAST_ACTIVATION	1	1	1	0.0942319	0.238198	0.167605
GOBP_FIBROBLAST_APOPTOTIC_PROCESS	0.350387	1	0.891032	0.0944296	0.238198	0.167605
GOBP_FIBROBLAST_GROWTH_FACTOR_RECEPTOR_SIGNALING_PATHWAY	0.27862	1	0.891032	0.00742734	0.0363097	0.0255489
GOBP_FIBROBLAST_MIGRATION	0.80343	1	0.891032	0.224032	0.43882	0.308771
GOBP_FIBROBLAST_PROLIFERATION	0.953689	1	0.891032	0.00016011	0.00189129	0.00133079
GOBP_FILOPODIUM_ASSEMBLY	0.986199	1	0.891032	0.0937737	0.238198	0.167605
GOBP_FLAVONOID_METABOLIC_PROCESS	1	1	1	0.0208235	0.0782815	0.0550819
GOBP_FLUID_TRANSPORT	0.955239	1	0.891032	0.130272	0.297624	0.20942
GOBP_FOAM_CELL_DIFFERENTIATION	1	1	1	0.023071	0.0845454	0.0594894
GOBP_FOCAL_ADHESION_ASSEMBLY	0.917146	1	0.891032	0.0133145	0.0571113	0.0401858
GOBP_FOLIC_ACID_CONTAINING_COMPOUND_BIOSYNTHETIC_PROCESS	1	1	1	1	1	1
GOBP_FOLIC_ACID_CONTAINING_COMPOUND_METABOLIC_PROCESS	1	1	1	0.0766136	0.208881	0.146977
GOBP_FOLIC_ACID_METABOLIC_PROCESS	1	1	1	0.182956	0.374111	0.26324
GOBP_FOREBRAIN_CELL_MIGRATION	0.756291	1	0.891032	0.0324575	0.10813	0.0760844
GOBP_FOREBRAIN_DEVELOPMENT	0.999747	1	0.891032	0.0157086	0.0640733	0.0450845
GOBP_FOREBRAIN_GENERATION_OF_NEURONS	1	1	1	0.0206925	0.0782815	0.0550819
GOBP_FOREBRAIN_MORPHOGENESIS	0.632654	1	0.891032	0.698587	0.894668	0.629523
GOBP_FOREBRAIN_NEURON_DEVELOPMENT	1	1	1	0.0555532	0.162199	0.114129
GOBP_FOREBRAIN_REGIONALIZATION	1	1	1	0.397267	0.625843	0.440367
GOBP_FORELIMB_MORPHOGENESIS	0.972893	1	0.891032	0.0442859	0.137496	0.0967477
GOBP_FORMATION_OF_CYTOPLASMIC_TRANSLATION_INITIATION_COMPLEX	3.89e-06	9.16e-05	8.16e-05	1	1	1
GOBP_FORMATION_OF_EXTRACHROMOSOMAL_CIRCULAR_DNA	0.00173946	0.0196668	0.0175238	1	1	1
GOBP_FORMATION_OF_PRIMARY_GERM_LAYER	0.930202	1	0.891032	8.03e-06	0.00015856	0.00011157
GOBP_FORMATION_OF_TRANSLATION_PREINITIATION_COMPLEX	0.66767	1	0.891032	1	1	1
GOBP_FRUCTOSE_1_6_BISPHOSPHATE_METABOLIC_PROCESS	1	1	1	1	1	1
GOBP_FRUCTOSE_6_PHOSPHATE_METABOLIC_PROCESS	1	1	1	0.119101	0.277425	0.195207
GOBP_FRUCTOSE_METABOLIC_PROCESS	1	1	1	0.518193	0.738578	0.519693
GOBP_FUCOSE_METABOLIC_PROCESS	1	1	1	1	1	1
GOBP_FUCOSYLATION	0.81783	1	0.891032	0.869866	0.985721	0.693592
GOBP_FUSION_OF_SPERM_TO_EGG_PLASMA_MEMBRANE_INVOLVED_IN_SINGLE_FERTILIZATION	1	1	1	0.728217	0.911992	0.641713
GOBP_G_PROTEIN_COUPLED_ACETYLCHOLINE_RECEPTOR_SIGNALING_PATHWAY	0.850918	1	0.891032	0.897637	0.999426	0.703235
GOBP_G_PROTEIN_COUPLED_GLUTAMATE_RECEPTOR_SIGNALING_PATHWAY	1	1	1	0.518193	0.738578	0.519693
GOBP_G_PROTEIN_COUPLED_PURINERGIC_NUCLEOTIDE_RECEPTOR_SIGNALING_PATHWAY	1	1	1	0.204863	0.407101	0.286452
GOBP_G_PROTEIN_COUPLED_PURINERGIC_RECEPTOR_SIGNALING_PATHWAY	1	1	1	0.762886	0.928713	0.653479
GOBP_G_PROTEIN_COUPLED_RECEPTOR_INTERNALIZATION	1	1	1	1	1	1
GOBP_G_PROTEIN_COUPLED_RECEPTOR_SIGNALING_PATHWAY_COUPLED_TO_CYCLIC_NUCLEOTIDE_SECOND_MESSENGER	1	1	1	0.985391	1	0.703639
GOBP_G_PROTEIN_COUPLED_RECEPTOR_SIGNALING_PATHWAY_INVOLVED_IN_HEART_PROCESS	1	1	1	0.204863	0.407101	0.286452
GOBP_G0_TO_G1_TRANSITION	0.0312754	0.22732	0.20255	0.975184	1	0.703639
GOBP_G2_DNA_DAMAGE_CHECKPOINT	0.122697	0.634555	0.565409	0.384928	0.618382	0.435118
GOBP_GABAERGIC_NEURON_DIFFERENTIATION	1	1	1	0.400195	0.625843	0.440367
GOBP_GALACTOSE_METABOLIC_PROCESS	1	1	1	0.441182	0.668447	0.470345
GOBP_GAMMA_AMINOBUTYRIC_ACID_SIGNALING_PATHWAY	1	1	1	0.602142	0.814879	0.573381
GOBP_GAMMA_AMINOBUTYRIC_ACID_TRANSPORT	1	1	1	0.174769	0.362791	0.255274
GOBP_GAMMA_DELTA_T_CELL_ACTIVATION	1	1	1	0.159763	0.341386	0.240212
GOBP_GAMMA_DELTA_T_CELL_DIFFERENTIATION	1	1	1	0.146065	0.318402	0.22404
GOBP_GANGLION_DEVELOPMENT	1	1	1	0.0275341	0.0954538	0.067165
GOBP_GANGLIOSIDE_BIOSYNTHETIC_PROCESS	1	1	1	0.518193	0.738578	0.519693
GOBP_GANGLIOSIDE_METABOLIC_PROCESS	0.70291	1	0.891032	0.548268	0.767641	0.540142
GOBP_GAP_JUNCTION_ASSEMBLY	1	1	1	0.00175072	0.0120352	0.00846846
GOBP_GAS_HOMEOSTASIS	1	1	1	0.314433	0.541187	0.3808
GOBP_GAS_TRANSPORT	1	1	1	0.00094221	0.00748299	0.00526532
GOBP_GASTRIC_ACID_SECRETION	1	1	1	0.300204	0.535512	0.376807
GOBP_GASTRO_INTESTINAL_SYSTEM_SMOOTH_MUSCLE_CONTRACTION	1	1	1	0.0382082	0.121462	0.0854656
GOBP_GASTRULATION	0.542975	1	0.891032	0.00019179	0.00218775	0.00153939
GOBP_GASTRULATION_WITH_MOUTH_FORMING_SECOND	0.17048	0.785627	0.700019	0.490326	0.714681	0.502878
GOBP_GDP_METABOLIC_PROCESS	1	1	1	0.119101	0.277425	0.195207
GOBP_GENETIC_IMPRINTING	0.00726184	0.0673419	0.0600038	0.548268	0.767641	0.540142
GOBP_GENITALIA_DEVELOPMENT	0.776968	1	0.891032	0.336431	0.569596	0.40079
GOBP_GENITALIA_MORPHOGENESIS	0.699351	1	0.891032	0.400195	0.625843	0.440367
GOBP_GERM_CELL_DEVELOPMENT	0.981749	1	0.891032	0.919655	1	0.703639
GOBP_GERMINAL_CENTER_FORMATION	0.753944	1	0.891032	0.204863	0.407101	0.286452
GOBP_GLAND_DEVELOPMENT	0.9961	1	0.891032	2.49e-08	1.35e-06	9.47e-07
GOBP_GLAND_MORPHOGENESIS	0.913831	1	0.891032	3.11e-08	1.54e-06	1.08e-06
GOBP_GLANDULAR_EPITHELIAL_CELL_DEVELOPMENT	0.70291	1	0.891032	0.310809	0.541187	0.3808
GOBP_GLANDULAR_EPITHELIAL_CELL_DIFFERENTIATION	0.848464	1	0.891032	0.296058	0.533019	0.375053
GOBP_GLIAL_CELL_APOPTOTIC_PROCESS	1	1	1	0.0644279	0.180958	0.127329
GOBP_GLIAL_CELL_DERIVED_NEUROTROPHIC_FACTOR_RECEPTOR_SIGNALING_PATHWAY	1	1	1	0.0194755	0.0752815	0.052971
GOBP_GLIAL_CELL_DEVELOPMENT	0.985226	1	0.891032	0.0457667	0.140593	0.0989267
GOBP_GLIAL_CELL_DIFFERENTIATION	0.999992	1	0.891032	0.0313811	0.10545	0.0741985
GOBP_GLIAL_CELL_MIGRATION	1	1	1	0.0504265	0.149958	0.105517
GOBP_GLIAL_CELL_PROLIFERATION	0.950664	1	0.891032	0.462293	0.690879	0.48613
GOBP_GLIOGENESIS	1	1	0.891032	0.00438843	0.0245478	0.0172728
GOBP_GLOBAL_GENOME_NUCLEOTIDE_EXCISION_REPAIR	0.0323228	0.233133	0.207729	1	1	1
GOBP_GLOMERULAR_BASEMENT_MEMBRANE_DEVELOPMENT	1	1	1	0.35784	0.587853	0.413636
GOBP_GLOMERULAR_EPITHELIAL_CELL_DEVELOPMENT	0.728013	1	0.891032	0.441182	0.668447	0.470345
GOBP_GLOMERULAR_EPITHELIAL_CELL_DIFFERENTIATION	0.877999	1	0.891032	0.0800829	0.213754	0.150406
GOBP_GLOMERULAR_EPITHELIUM_DEVELOPMENT	0.909686	1	0.891032	0.0142011	0.0599683	0.0421961
GOBP_GLOMERULAR_MESANGIAL_CELL_PROLIFERATION	1	1	1	0.119101	0.277425	0.195207
GOBP_GLOMERULAR_MESANGIUM_DEVELOPMENT	1	1	1	0.00606011	0.0313027	0.0220258
GOBP_GLOMERULUS_DEVELOPMENT	0.998008	1	0.891032	0.00037687	0.00370814	0.00260919
GOBP_GLUCAN_BIOSYNTHETIC_PROCESS	0.64995	1	0.891032	0.14201	0.31825	0.223933
GOBP_GLUCOCORTICOID_BIOSYNTHETIC_PROCESS	1	1	1	0.0446818	0.137547	0.0967838
GOBP_GLUCOCORTICOID_METABOLIC_PROCESS	1	1	1	0.144476	0.318402	0.22404
GOBP_GLUCOCORTICOID_SECRETION	1	1	1	0.698587	0.894668	0.629523
GOBP_GLUCOSAMINE_CONTAINING_COMPOUND_METABOLIC_PROCESS	1	1	1	0.00629868	0.0320022	0.022518
GOBP_GLUCOSE_6_PHOSPHATE_METABOLIC_PROCESS	0.70291	1	0.891032	0.144476	0.318402	0.22404
GOBP_GLUCOSE_CATABOLIC_PROCESS	0.972893	1	0.891032	0.592159	0.806292	0.567339
GOBP_GLUCOSE_IMPORT	0.93106	1	0.891032	0.126116	0.291892	0.205387
GOBP_GLUCOSE_METABOLIC_PROCESS	0.908027	1	0.891032	0.201473	0.407101	0.286452
GOBP_GLUTAMATE_METABOLIC_PROCESS	1	1	1	0.0274739	0.0954538	0.067165
GOBP_GLUTAMATE_RECEPTOR_SIGNALING_PATHWAY	0.99508	1	0.891032	0.863826	0.983907	0.692316
GOBP_GLUTAMATE_SECRETION	1	1	1	0.0755339	0.207029	0.145673
GOBP_GLUTAMINE_FAMILY_AMINO_ACID_BIOSYNTHETIC_PROCESS	0.81783	1	0.891032	0.300204	0.535512	0.376807
GOBP_GLUTAMINE_FAMILY_AMINO_ACID_CATABOLIC_PROCESS	1	1	1	0.182951	0.374111	0.26324
GOBP_GLUTAMINE_FAMILY_AMINO_ACID_METABOLIC_PROCESS	0.995182	1	0.891032	0.0763453	0.208881	0.146977
GOBP_GLUTAMINE_METABOLIC_PROCESS	0.900163	1	0.891032	0.257945	0.483178	0.339983
GOBP_GLUTATHIONE_CATABOLIC_PROCESS	1	1	1	0.00470779	0.0256629	0.0180574
GOBP_GLUTATHIONE_DERIVATIVE_METABOLIC_PROCESS	1	1	1	8.01e-06	0.00015856	0.00011157
GOBP_GLUTATHIONE_METABOLIC_PROCESS	1	1	1	2.12e-07	8.1e-06	5.7e-06
GOBP_GLYCEROL_ETHER_METABOLIC_PROCESS	1	1	1	0.0250999	0.090344	0.0635696
GOBP_GLYCEROLIPID_BIOSYNTHETIC_PROCESS	0.719009	1	0.891032	0.380401	0.612378	0.430893
GOBP_GLYCEROLIPID_CATABOLIC_PROCESS	0.999404	1	0.891032	0.001215	0.00913504	0.00642777
GOBP_GLYCEROLIPID_METABOLIC_PROCESS	0.869775	1	0.891032	0.156061	0.337662	0.237592
GOBP_GLYCEROPHOSPHOLIPID_CATABOLIC_PROCESS	0.95951	1	0.891032	0.00735984	0.0360555	0.02537
GOBP_GLYCEROPHOSPHOLIPID_METABOLIC_PROCESS	0.734361	1	0.891032	0.17604	0.365102	0.2569
GOBP_GLYCINE_METABOLIC_PROCESS	1	1	1	0.0551867	0.162146	0.114092
GOBP_GLYCINE_TRANSPORT	1	1	1	0.174769	0.362791	0.255274
GOBP_GLYCOLIPID_BIOSYNTHETIC_PROCESS	0.184726	0.834924	0.743945	0.888079	0.995933	0.700777
GOBP_GLYCOLIPID_CATABOLIC_PROCESS	0.798628	1	0.891032	0.853273	0.976915	0.687396
GOBP_GLYCOLYTIC_PROCESS_THROUGH_FRUCTOSE_6_PHOSPHATE	0.945296	1	0.891032	0.418058	0.649196	0.4568
GOBP_GLYCOPROTEIN_BIOSYNTHETIC_PROCESS	0.668638	1	0.891032	0.333527	0.567001	0.398964
GOBP_GLYCOPROTEIN_CATABOLIC_PROCESS	0.481909	1	0.891032	0.0080803	0.0390506	0.0274775
GOBP_GLYCOPROTEIN_METABOLIC_PROCESS	0.651295	1	0.891032	0.0593328	0.170664	0.120086
GOBP_GLYCOSIDE_CATABOLIC_PROCESS	1	1	1	1	1	1
GOBP_GLYCOSIDE_METABOLIC_PROCESS	1	1	1	0.0800829	0.213754	0.150406
GOBP_GLYCOSPHINGOLIPID_BIOSYNTHETIC_PROCESS	0.939526	1	0.891032	0.391385	0.625843	0.440367
GOBP_GLYCOSPHINGOLIPID_METABOLIC_PROCESS	0.89236	1	0.891032	0.783017	0.942866	0.663438
GOBP_GLYCOSYL_COMPOUND_BIOSYNTHETIC_PROCESS	0.371252	1	0.891032	0.0951144	0.23889	0.168092
GOBP_GLYCOSYL_COMPOUND_CATABOLIC_PROCESS	0.987854	1	0.891032	0.00083458	0.00688676	0.0048458
GOBP_GLYCOSYL_COMPOUND_METABOLIC_PROCESS	0.796263	1	0.891032	0.00234285	0.0149161	0.0104955
GOBP_GLYCOSYLATION	0.167205	0.780851	0.695763	0.576513	0.794285	0.55889
GOBP_GLYCOSYLCERAMIDE_METABOLIC_PROCESS	0.81783	1	0.891032	0.300204	0.535512	0.376807
GOBP_GLYOXYLATE_METABOLIC_PROCESS	1	1	1	0.698587	0.894668	0.629523
GOBP_GMP_METABOLIC_PROCESS	1	1	1	0.0208235	0.0782815	0.0550819
GOBP_GOLGI_LOCALIZATION	0.142388	0.705384	0.62852	1	1	1
GOBP_GOLGI_ORGANIZATION	0.0775716	0.461386	0.41111	0.99998	1	0.703639
GOBP_GOLGI_RIBBON_FORMATION	0.728013	1	0.891032	1	1	1
GOBP_GOLGI_TO_ENDOSOME_TRANSPORT	0.4914	1	0.891032	0.587784	0.801273	0.563807
GOBP_GOLGI_TO_LYSOSOME_TRANSPORT	0.66767	1	0.891032	0.732662	0.911992	0.641713
GOBP_GOLGI_TO_PLASMA_MEMBRANE_PROTEIN_TRANSPORT	0.162367	0.774794	0.690366	0.83268	0.965945	0.679677
GOBP_GOLGI_TO_PLASMA_MEMBRANE_TRANSPORT	0.00105067	0.012558	0.0111896	0.81133	0.951613	0.669592
GOBP_GOLGI_TO_VACUOLE_TRANSPORT	0.269188	1	0.891032	0.897637	0.999426	0.703235
GOBP_GOLGI_VESICLE_BUDDING	0.245616	0.991976	0.883883	1	1	1
GOBP_GOLGI_VESICLE_TRANSPORT	1.07e-07	3.36e-06	2.99e-06	0.999492	1	0.703639
GOBP_GONADOTROPIN_SECRETION	1	1	1	0.174769	0.362791	0.255274
GOBP_GPI_ANCHOR_METABOLIC_PROCESS	0.0106207	0.0932093	0.0830525	0.980943	1	0.703639
GOBP_GRANULOCYTE_CHEMOTAXIS	0.99994	1	0.891032	1.85e-13	4.52e-11	3.18e-11
GOBP_GRANULOCYTE_DIFFERENTIATION	0.835852	1	0.891032	0.00912607	0.0427291	0.0300659
GOBP_GRANULOCYTE_MACROPHAGE_COLONY_STIMULATING_FACTOR_PRODUCTION	0.798628	1	0.891032	0.0978674	0.24292	0.170928
GOBP_GRANULOCYTE_MIGRATION	0.999948	1	0.891032	9.37e-13	1.9e-10	1.33e-10
GOBP_GROOMING_BEHAVIOR	1	1	1	0.553951	0.771882	0.543127
GOBP_GROWTH_HORMONE_RECEPTOR_SIGNALING_PATHWAY_VIA_JAK_STAT	1	1	1	0.480568	0.705096	0.496133
GOBP_GROWTH_HORMONE_SECRETION	1	1	1	1	1	1
GOBP_GROWTH_PLATE_CARTILAGE_DEVELOPMENT	1	1	1	0.0802841	0.213754	0.150406
GOBP_GTP_BIOSYNTHETIC_PROCESS	1	1	1	0.732662	0.911992	0.641713
GOBP_GTP_METABOLIC_PROCESS	0.681118	1	0.891032	0.284196	0.516458	0.3634
GOBP_GUANOSINE_CONTAINING_COMPOUND_BIOSYNTHETIC_PROCESS	1	1	1	0.441182	0.668447	0.470345
GOBP_GUANOSINE_CONTAINING_COMPOUND_METABOLIC_PROCESS	0.747643	1	0.891032	0.0315512	0.105716	0.0743859
GOBP_HAIR_CELL_DIFFERENTIATION	0.986572	1	0.891032	0.207053	0.409223	0.287946
GOBP_HAIR_FOLLICLE_MATURATION	0.699351	1	0.891032	0.146065	0.318402	0.22404
GOBP_HEAD_MORPHOGENESIS	0.835852	1	0.891032	0.000676	0.00578325	0.00406932
GOBP_HEART_FIELD_SPECIFICATION	1	1	1	0.0446818	0.137547	0.0967838
GOBP_HEART_FORMATION	1	1	1	0.0389222	0.122394	0.0861215
GOBP_HEART_GROWTH	0.999495	1	0.891032	0.236279	0.450119	0.316721
GOBP_HEART_MORPHOGENESIS	0.992574	1	0.891032	0.00010257	0.00130421	0.00091769
GOBP_HEART_PROCESS	1	1	0.891032	0.036242	0.117951	0.0829952
GOBP_HEART_TRABECULA_FORMATION	0.728013	1	0.891032	0.441182	0.668447	0.470345
GOBP_HEART_TRABECULA_MORPHOGENESIS	0.950516	1	0.891032	0.246524	0.466012	0.327904
GOBP_HEART_VALVE_DEVELOPMENT	0.983595	1	0.891032	0.00094192	0.00748299	0.00526532
GOBP_HEART_VALVE_FORMATION	1	1	1	0.204863	0.407101	0.286452
GOBP_HEAT_GENERATION	1	1	1	0.00105455	0.00823473	0.00579428
GOBP_HEMATOPOIETIC_PROGENITOR_CELL_DIFFERENTIATION	1.08e-08	4.09e-07	3.65e-07	0.882654	0.993928	0.699367
GOBP_HEMATOPOIETIC_STEM_CELL_DIFFERENTIATION	4.3e-11	2.22e-09	1.98e-09	0.976298	1	0.703639
GOBP_HEMATOPOIETIC_STEM_CELL_HOMEOSTASIS	0.777404	1	0.891032	0.236007	0.449879	0.316552
GOBP_HEMATOPOIETIC_STEM_CELL_PROLIFERATION	0.918302	1	0.891032	0.0178449	0.0709829	0.0499464
GOBP_HEME_METABOLIC_PROCESS	0.835852	1	0.891032	0.736842	0.915446	0.644144
GOBP_HEME_TRANSPORT	0.632654	1	0.891032	0.314433	0.541187	0.3808
GOBP_HEMIDESMOSOME_ASSEMBLY	1	1	1	8.53e-06	0.00016671	0.0001173
GOBP_HEMOGLOBIN_BIOSYNTHETIC_PROCESS	1	1	1	0.35784	0.587853	0.413636
GOBP_HEMOGLOBIN_METABOLIC_PROCESS	0.798628	1	0.891032	0.553951	0.771882	0.543127
GOBP_HEPARAN_SULFATE_PROTEOGLYCAN_BIOSYNTHETIC_PROCESS	0.70291	1	0.891032	1	1	1
GOBP_HEPARAN_SULFATE_PROTEOGLYCAN_METABOLIC_PROCESS	0.808851	1	0.891032	0.470458	0.700867	0.493158
GOBP_HEPARIN_METABOLIC_PROCESS	0.699351	1	0.891032	1	1	1
GOBP_HEPATICOBILIARY_SYSTEM_DEVELOPMENT	0.869016	1	0.891032	0.107594	0.263548	0.185442
GOBP_HEPATOCYTE_APOPTOTIC_PROCESS	1	1	1	0.480568	0.705096	0.496133
GOBP_HEPATOCYTE_DIFFERENTIATION	0.798628	1	0.891032	0.00105455	0.00823473	0.00579428
GOBP_HEPATOCYTE_GROWTH_FACTOR_RECEPTOR_SIGNALING_PATHWAY	0.798628	1	0.891032	0.0275341	0.0954538	0.067165
GOBP_HETEROCHROMATIN_ORGANIZATION	0.953689	1	0.891032	0.995793	1	0.703639
GOBP_HETEROPHILIC_CELL_CELL_ADHESION_VIA_PLASMA_MEMBRANE_CELL_ADHESION_MOLECULES	0.991013	1	0.891032	1.51e-06	4.22e-05	2.97e-05
GOBP_HETEROTYPIC_CELL_CELL_ADHESION	0.997564	1	0.891032	4.99e-06	0.00011302	7.95e-05
GOBP_HIGH_DENSITY_LIPOPROTEIN_PARTICLE_ASSEMBLY	0.459037	1	0.891032	1	1	1
GOBP_HIGH_DENSITY_LIPOPROTEIN_PARTICLE_CLEARANCE	1	1	1	0.853273	0.976915	0.687396
GOBP_HIGH_DENSITY_LIPOPROTEIN_PARTICLE_REMODELING	1	1	1	0.61967	0.831347	0.584968
GOBP_HINDBRAIN_DEVELOPMENT	0.782713	1	0.891032	0.153595	0.33336	0.234565
GOBP_HINDBRAIN_MORPHOGENESIS	0.91933	1	0.891032	0.713907	0.908371	0.639166
GOBP_HINDLIMB_MORPHOGENESIS	0.848016	1	0.891032	0.0820916	0.216953	0.152657
GOBP_HIPPO_SIGNALING	0.8272	1	0.891032	0.778866	0.941517	0.662488
GOBP_HIPPOCAMPUS_DEVELOPMENT	0.974873	1	0.891032	0.846917	0.976841	0.687343
GOBP_HISTAMINE_SECRETION	0.66767	1	0.891032	0.35784	0.587853	0.413636
GOBP_HISTAMINE_TRANSPORT	0.753944	1	0.891032	0.204863	0.407101	0.286452
GOBP_HISTIDINE_METABOLIC_PROCESS	1	1	1	0.0194755	0.0752815	0.052971
GOBP_HISTONE_ARGININE_METHYLATION	0.282488	1	0.891032	1	1	1
GOBP_HISTONE_DEACETYLATION	0.112653	0.605911	0.539886	0.945002	1	0.703639
GOBP_HISTONE_DEUBIQUITINATION	0.0616126	0.38098	0.339466	1	1	1
GOBP_HISTONE_EXCHANGE	0.0076408	0.0696552	0.0620651	1	1	1
GOBP_HISTONE_H2A_ACETYLATION	0.0715264	0.432185	0.38509	1	1	1
GOBP_HISTONE_H2A_MONOUBIQUITINATION	0.00057909	0.00749233	0.00667591	1	1	1
GOBP_HISTONE_H2A_UBIQUITINATION	0.00913564	0.0815064	0.0726248	1	1	1
GOBP_HISTONE_H2B_UBIQUITINATION	0.00041283	0.00553585	0.00493262	1	1	1
GOBP_HISTONE_H3_ACETYLATION	1.61e-06	4.19e-05	3.73e-05	0.822802	0.959488	0.675134
GOBP_HISTONE_H3_DEACETYLATION	0.269188	1	0.891032	1	1	1
GOBP_HISTONE_H3_K14_ACETYLATION	0.0377606	0.263763	0.235022	1	1	1
GOBP_HISTONE_H3_K27_METHYLATION	0.4914	1	0.891032	1	1	1
GOBP_HISTONE_H3_K36_DEMETHYLATION	0.0622318	0.38098	0.339466	1	1	1
GOBP_HISTONE_H3_K36_METHYLATION	0.425503	1	0.891032	1	1	1
GOBP_HISTONE_H3_K4_METHYLATION	0.0101777	0.0901621	0.0803374	0.998278	1	0.703639
GOBP_HISTONE_H3_K4_TRIMETHYLATION	0.018214	0.147475	0.131405	1	1	1
GOBP_HISTONE_H3_K9_ACETYLATION	0.119968	0.627333	0.558974	0.789695	0.942866	0.663438
GOBP_HISTONE_H3_K9_DEMETHYLATION	0.753944	1	0.891032	0.813473	0.951613	0.669592
GOBP_HISTONE_H3_K9_METHYLATION	0.408774	1	0.891032	0.9831	1	0.703639
GOBP_HISTONE_H3_K9_MODIFICATION	0.254807	1	0.891032	0.969593	1	0.703639
GOBP_HISTONE_H3_K9_TRIMETHYLATION	0.699351	1	0.891032	1	1	1
GOBP_HISTONE_H4_ACETYLATION	0.0110489	0.0960715	0.0856028	0.895474	0.999426	0.703235
GOBP_HISTONE_H4_DEACETYLATION	0.282488	1	0.891032	1	1	1
GOBP_HISTONE_H4_K16_ACETYLATION	0.133475	0.6791	0.6051	1	1	1
GOBP_HISTONE_H4_K5_ACETYLATION	0.0589823	0.370114	0.329784	1	1	1
GOBP_HISTONE_METHYLATION	3.72e-06	8.81e-05	7.85e-05	0.999975	1	0.703639
GOBP_HISTONE_MONOUBIQUITINATION	5.96e-06	0.00013606	0.00012123	0.969188	1	0.703639
GOBP_HISTONE_MRNA_CATABOLIC_PROCESS	0.282488	1	0.891032	1	1	1
GOBP_HISTONE_MRNA_METABOLIC_PROCESS	0.00121705	0.0142747	0.0127192	1	1	1
GOBP_HISTONE_PHOSPHORYLATION	0.979939	1	0.891032	0.00971372	0.0449828	0.0316516
GOBP_HISTONE_SERINE_PHOSPHORYLATION	1	1	1	0.0279142	0.0954538	0.067165
GOBP_HISTONE_UBIQUITINATION	0.00032417	0.00447069	0.00398353	0.996457	1	0.703639
GOBP_HOMEOSTASIS_OF_NUMBER_OF_CELLS	0.753553	1	0.891032	0.00303342	0.0180531	0.0127029
GOBP_HOMEOSTASIS_OF_NUMBER_OF_CELLS_WITHIN_A_TISSUE	0.456466	1	0.891032	0.337637	0.569596	0.40079
GOBP_HOMOCYSTEINE_METABOLIC_PROCESS	1	1	1	0.174769	0.362791	0.255274
GOBP_HOMOLOGOUS_CHROMOSOME_PAIRING_AT_MEIOSIS	0.322828	1	0.891032	1	1	1
GOBP_HOMOLOGOUS_CHROMOSOME_SEGREGATION	0.345645	1	0.891032	0.993567	1	0.703639
GOBP_HOMOLOGOUS_RECOMBINATION	0.0248489	0.188242	0.16773	1	1	1
GOBP_HOMOPHILIC_CELL_ADHESION_VIA_PLASMA_MEMBRANE_ADHESION_MOLECULES	1	1	1	4.19e-05	0.00063263	0.00044514
GOBP_HOMOTYPIC_CELL_CELL_ADHESION	0.917146	1	0.891032	1.31e-06	3.8e-05	2.67e-05
GOBP_HORMONE_BIOSYNTHETIC_PROCESS	1	1	1	0.525281	0.742831	0.522685
GOBP_HORMONE_CATABOLIC_PROCESS	1	1	1	0.0279142	0.0954538	0.067165
GOBP_HORMONE_MEDIATED_SIGNALING_PATHWAY	0.889408	1	0.891032	0.693545	0.894668	0.629523
GOBP_HORMONE_METABOLIC_PROCESS	1	1	0.891032	2.19e-09	1.62e-07	1.14e-07
GOBP_HORMONE_TRANSPORT	0.999898	1	0.891032	0.00158089	0.0111986	0.00787976
GOBP_HUMORAL_IMMUNE_RESPONSE	1	1	0.891032	0.00303324	0.0180531	0.0127029
GOBP_HUMORAL_IMMUNE_RESPONSE_MEDIATED_BY_CIRCULATING_IMMUNOGLOBULIN	1	1	0.891032	0.99957	1	0.703639
GOBP_HYALURONAN_BIOSYNTHETIC_PROCESS	1	1	1	0.480568	0.705096	0.496133
GOBP_HYALURONAN_CATABOLIC_PROCESS	0.835202	1	0.891032	0.0446818	0.137547	0.0967838
GOBP_HYALURONAN_METABOLIC_PROCESS	0.979939	1	0.891032	0.144692	0.318402	0.22404
GOBP_HYDROGEN_PEROXIDE_BIOSYNTHETIC_PROCESS	1	1	1	0.117066	0.277425	0.195207
GOBP_HYDROGEN_PEROXIDE_CATABOLIC_PROCESS	1	1	1	0.470458	0.700867	0.493158
GOBP_HYDROGEN_PEROXIDE_METABOLIC_PROCESS	0.97482	1	0.891032	0.0950144	0.23889	0.168092
GOBP_HYPEROSMOTIC_RESPONSE	0.723447	1	0.891032	0.00031849	0.00324284	0.00228179
GOBP_HYPEROSMOTIC_SALINITY_RESPONSE	0.319186	1	0.891032	0.146065	0.318402	0.22404
GOBP_HYPERSENSITIVITY	1	1	1	0.314433	0.541187	0.3808
GOBP_HYPOTHALAMUS_DEVELOPMENT	1	1	1	0.677656	0.886399	0.623705
GOBP_HYPOTONIC_RESPONSE	1	1	1	0.0194755	0.0752815	0.052971
GOBP_I_KAPPAB_KINASE_NF_KAPPAB_SIGNALING	0.170819	0.786225	0.700552	0.0166423	0.0668852	0.047063
GOBP_I_KAPPAB_PHOSPHORYLATION	0.296158	1	0.891032	0.397267	0.625843	0.440367
GOBP_ICOSANOID_BIOSYNTHETIC_PROCESS	1	1	1	9.66e-05	0.00124132	0.00087344
GOBP_ICOSANOID_METABOLIC_PROCESS	1	1	1	1.52e-07	5.99e-06	4.22e-06
GOBP_ICOSANOID_SECRETION	1	1	1	0.00696495	0.0348547	0.0245251
GOBP_ICOSANOID_TRANSPORT	1	1	1	0.00361079	0.0209013	0.0147069
GOBP_IMMATURE_B_CELL_DIFFERENTIATION	0.245616	0.991976	0.883883	1	1	1
GOBP_IMMATURE_T_CELL_PROLIFERATION	1	1	1	0.00470779	0.0256629	0.0180574
GOBP_IMMUNE_RESPONSE_INHIBITING_SIGNAL_TRANSDUCTION	1	1	1	0.0194755	0.0752815	0.052971
GOBP_IMMUNE_RESPONSE_TO_TUMOR_CELL	0.633629	1	0.891032	0.728217	0.911992	0.641713
GOBP_IMMUNOGLOBULIN_PRODUCTION	0.968622	1	0.891032	0.981569	1	0.703639
GOBP_IMMUNOGLOBULIN_PRODUCTION_INVOLVED_IN_IMMUNOGLOBULIN_MEDIATED_IMMUNE_RESPONSE	0.2523	1	0.891032	0.410774	0.638951	0.449591
GOBP_IMMUNOLOGICAL_MEMORY_FORMATION_PROCESS	1	1	1	0.204863	0.407101	0.286452
GOBP_IMMUNOLOGICAL_MEMORY_PROCESS	1	1	1	0.300204	0.535512	0.376807
GOBP_IMMUNOLOGICAL_SYNAPSE_FORMATION	1	1	1	0.00175072	0.0120352	0.00846846
GOBP_IMP_BIOSYNTHETIC_PROCESS	1	1	1	0.698587	0.894668	0.629523
GOBP_IMP_METABOLIC_PROCESS	1	1	1	0.813473	0.951613	0.669592
GOBP_IMPORT_ACROSS_PLASMA_MEMBRANE	0.999998	1	0.891032	0.00022415	0.00246622	0.00173533
GOBP_IMPORT_INTO_CELL	1	1	0.891032	7.95e-05	0.00107304	0.00075503
GOBP_IMPORT_INTO_NUCLEUS	0.00072162	0.00896662	0.00798955	0.963806	1	0.703639
GOBP_IN_UTERO_EMBRYONIC_DEVELOPMENT	0.0397695	0.272736	0.243017	0.902633	1	0.703639
GOBP_INACTIVATION_OF_MAPK_ACTIVITY	0.456466	1	0.891032	0.575742	0.793456	0.558307
GOBP_INCLUSION_BODY_ASSEMBLY	0.658034	1	0.891032	0.750873	0.927186	0.652404
GOBP_INDOLALKYLAMINE_METABOLIC_PROCESS	1	1	1	0.117066	0.277425	0.195207
GOBP_INDOLE_CONTAINING_COMPOUND_METABOLIC_PROCESS	1	1	1	0.0465032	0.141733	0.0997287
GOBP_INDUCTION_OF_POSITIVE_CHEMOTAXIS	1	1	1	0.00277262	0.0168898	0.0118843
GOBP_INFLAMMATORY_CELL_APOPTOTIC_PROCESS	1	1	1	0.0197719	0.075673	0.0532465
GOBP_INFLAMMATORY_RESPONSE_TO_ANTIGENIC_STIMULUS	0.984952	1	0.891032	0.00821907	0.0395653	0.0278397
GOBP_INFLAMMATORY_RESPONSE_TO_WOUNDING	1	1	1	0.0275341	0.0954538	0.067165
GOBP_INHIBITORY_POSTSYNAPTIC_POTENTIAL	1	1	1	0.441182	0.668447	0.470345
GOBP_INHIBITORY_SYNAPSE_ASSEMBLY	1	1	1	0.0275341	0.0954538	0.067165
GOBP_INNATE_IMMUNE_RESPONSE_ACTIVATING_SIGNAL_TRANSDUCTION	5.7e-10	2.47e-08	2.2e-08	0.0122923	0.053069	0.0373414
GOBP_INNATE_IMMUNE_RESPONSE_IN_MUCOSA	1	1	1	0.602142	0.814879	0.573381
GOBP_INNER_CELL_MASS_CELL_PROLIFERATION	0.0291138	0.214508	0.191133	1	1	1
GOBP_INNER_DYNEIN_ARM_ASSEMBLY	1	1	1	0.853273	0.976915	0.687396
GOBP_INNER_EAR_AUDITORY_RECEPTOR_CELL_DIFFERENTIATION	1	1	1	0.338037	0.569596	0.40079
GOBP_INNER_EAR_MORPHOGENESIS	0.993393	1	0.891032	0.00034169	0.00345703	0.0024325
GOBP_INNER_EAR_RECEPTOR_CELL_DEVELOPMENT	0.983587	1	0.891032	0.500033	0.725648	0.510594
GOBP_INNER_EAR_RECEPTOR_CELL_STEREOCILIUM_ORGANIZATION	0.955239	1	0.891032	0.470458	0.700867	0.493158
GOBP_INNER_MITOCHONDRIAL_MEMBRANE_ORGANIZATION	4.04e-10	1.81e-08	1.61e-08	1	1	1
GOBP_INNERVATION	0.658034	1	0.891032	0.011121	0.0491987	0.0346181
GOBP_INORGANIC_ANION_TRANSMEMBRANE_TRANSPORT	0.999994	1	0.891032	0.491901	0.716528	0.504177
GOBP_INORGANIC_ANION_TRANSPORT	0.999999	1	0.891032	0.470382	0.700867	0.493158
GOBP_INORGANIC_ION_IMPORT_ACROSS_PLASMA_MEMBRANE	1	1	1	0.299411	0.535512	0.376807
GOBP_INOSITOL_LIPID_MEDIATED_SIGNALING	0.992196	1	0.891032	2.41e-06	6.23e-05	4.39e-05
GOBP_INOSITOL_METABOLIC_PROCESS	1	1	1	0.732662	0.911992	0.641713
GOBP_INOSITOL_PHOSPHATE_BIOSYNTHETIC_PROCESS	0.933147	1	0.891032	0.182951	0.374111	0.26324
GOBP_INOSITOL_PHOSPHATE_CATABOLIC_PROCESS	0.835202	1	0.891032	0.884583	0.993928	0.699367
GOBP_INOSITOL_PHOSPHATE_MEDIATED_SIGNALING	0.891915	1	0.891032	0.00515134	0.0272436	0.0191696
GOBP_INOSITOL_PHOSPHATE_METABOLIC_PROCESS	0.993139	1	0.891032	0.0261034	0.0936112	0.0658685
GOBP_INOSITOL_TRISPHOSPHATE_METABOLIC_PROCESS	1	1	1	0.119101	0.277425	0.195207
GOBP_INSEMINATION	1	1	1	0.146065	0.318402	0.22404
GOBP_INSULIN_LIKE_GROWTH_FACTOR_RECEPTOR_SIGNALING_PATHWAY	0.970033	1	0.891032	0.00117784	0.00894254	0.00629232
GOBP_INSULIN_RECEPTOR_SIGNALING_PATHWAY	0.884752	1	0.891032	0.260437	0.486582	0.342378
GOBP_INSULIN_SECRETION	0.99837	1	0.891032	0.00172275	0.0119667	0.00842022
GOBP_INSULIN_SECRETION_INVOLVED_IN_CELLULAR_RESPONSE_TO_GLUCOSE_STIMULUS	0.754094	1	0.891032	0.45546	0.685104	0.482066
GOBP_INTEGRATED_STRESS_RESPONSE_SIGNALING	0.74277	1	0.891032	0.364539	0.59217	0.416674
GOBP_INTEGRIN_ACTIVATION	1	1	1	6.58e-07	2.17e-05	1.53e-05
GOBP_INTEGRIN_MEDIATED_SIGNALING_PATHWAY	0.999976	1	0.891032	2.8e-11	3.26e-09	2.3e-09
GOBP_INTERFERON_ALPHA_PRODUCTION	0.939526	1	0.891032	0.203458	0.407101	0.286452
GOBP_INTERFERON_BETA_PRODUCTION	0.00880409	0.0793	0.0706589	0.229286	0.447045	0.314559
GOBP_INTERFERON_GAMMA_MEDIATED_SIGNALING_PATHWAY	0.999892	1	0.891032	0.00574907	0.0300631	0.0211536
GOBP_INTERFERON_GAMMA_PRODUCTION	0.999833	1	0.891032	1.32e-05	0.00023725	0.00016694
GOBP_INTERLEUKIN_1_ALPHA_PRODUCTION	1	1	1	0.00470779	0.0256629	0.0180574
GOBP_INTERLEUKIN_1_BETA_PRODUCTION	0.999981	1	0.891032	0.00193918	0.0131	0.00921768
GOBP_INTERLEUKIN_1_MEDIATED_SIGNALING_PATHWAY	2.87e-13	2.04e-11	1.81e-11	0.954202	1	0.703639
GOBP_INTERLEUKIN_1_PRODUCTION	0.999954	1	0.891032	0.00013461	0.00163567	0.00115092
GOBP_INTERLEUKIN_10_PRODUCTION	0.984952	1	0.891032	0.00113845	0.00872877	0.0061419
GOBP_INTERLEUKIN_12_PRODUCTION	0.982119	1	0.891032	0.00607356	0.0313027	0.0220258
GOBP_INTERLEUKIN_13_PRODUCTION	1	1	1	0.00475873	0.0256629	0.0180574
GOBP_INTERLEUKIN_17_PRODUCTION	0.925612	1	0.891032	0.0193378	0.0752815	0.052971
GOBP_INTERLEUKIN_18_PRODUCTION	0.66767	1	0.891032	0.35784	0.587853	0.413636
GOBP_INTERLEUKIN_2_PRODUCTION	0.983595	1	0.891032	1.6e-06	4.44e-05	3.13e-05
GOBP_INTERLEUKIN_27_MEDIATED_SIGNALING_PATHWAY	0.66767	1	0.891032	0.35784	0.587853	0.413636
GOBP_INTERLEUKIN_35_MEDIATED_SIGNALING_PATHWAY	1	1	1	0.732662	0.911992	0.641713
GOBP_INTERLEUKIN_4_PRODUCTION	0.963375	1	0.891032	3.03e-05	0.00047658	0.00033534
GOBP_INTERLEUKIN_5_PRODUCTION	1	1	1	0.0152679	0.0628626	0.0442326
GOBP_INTERLEUKIN_6_MEDIATED_SIGNALING_PATHWAY	0.950516	1	0.891032	0.674607	0.886399	0.623705
GOBP_INTERLEUKIN_6_PRODUCTION	0.999998	1	0.891032	4.94e-05	0.00072319	0.00050887
GOBP_INTERLEUKIN_7_MEDIATED_SIGNALING_PATHWAY	0.950516	1	0.891032	0.674607	0.886399	0.623705
GOBP_INTERLEUKIN_8_PRODUCTION	0.997717	1	0.891032	0.116553	0.277425	0.195207
GOBP_INTERMEDIATE_FILAMENT_BASED_PROCESS	0.876078	1	0.891032	0.0566371	0.164846	0.115992
GOBP_INTERMEDIATE_FILAMENT_ORGANIZATION	1	1	1	0.126692	0.291892	0.205387
GOBP_INTERMEMBRANE_LIPID_TRANSFER	0.64995	1	0.891032	0.905082	1	0.703639
GOBP_INTERSTRAND_CROSS_LINK_REPAIR	1.39e-05	0.00028921	0.0002577	1	1	1
GOBP_INTESTINAL_ABSORPTION	0.979939	1	0.891032	0.00088005	0.00712305	0.00501206
GOBP_INTESTINAL_EPITHELIAL_CELL_DEVELOPMENT	1	1	1	0.789695	0.942866	0.663438
GOBP_INTESTINAL_EPITHELIAL_CELL_DIFFERENTIATION	1	1	1	0.728217	0.911992	0.641713
GOBP_INTESTINAL_LIPID_ABSORPTION	1	1	1	0.0551867	0.162146	0.114092
GOBP_INTRA_GOLGI_VESICLE_MEDIATED_TRANSPORT	0.0036796	0.0364571	0.0324845	0.9831	1	0.703639
GOBP_INTRA_S_DNA_DAMAGE_CHECKPOINT	0.4914	1	0.891032	1	1	1
GOBP_INTRACELLULAR_ESTROGEN_RECEPTOR_SIGNALING_PATHWAY	0.0888531	0.511517	0.455778	0.786618	0.942866	0.663438
GOBP_INTRACELLULAR_LIPID_TRANSPORT	0.468271	1	0.891032	0.155253	0.336225	0.236581
GOBP_INTRACELLULAR_MRNA_LOCALIZATION	0.0990017	0.549577	0.489691	1	1	1
GOBP_INTRACELLULAR_RECEPTOR_SIGNALING_PATHWAY	0.539142	1	0.891032	0.306102	0.541187	0.3808
GOBP_INTRACELLULAR_STEROID_HORMONE_RECEPTOR_SIGNALING_PATHWAY	0.391097	1	0.891032	0.634662	0.848525	0.597055
GOBP_INTRACELLULAR_STEROL_TRANSPORT	0.74277	1	0.891032	0.182951	0.374111	0.26324
GOBP_INTRACILIARY_RETROGRADE_TRANSPORT	0.753944	1	0.891032	0.813473	0.951613	0.669592
GOBP_INTRACILIARY_TRANSPORT	0.392977	1	0.891032	0.986614	1	0.703639
GOBP_INTRACILIARY_TRANSPORT_INVOLVED_IN_CILIUM_ASSEMBLY	0.176678	0.806296	0.718436	1	1	1
GOBP_INTRINSIC_APOPTOTIC_SIGNALING_PATHWAY	0.526912	1	0.891032	0.110383	0.267425	0.188171
GOBP_INTRINSIC_APOPTOTIC_SIGNALING_PATHWAY_BY_P53_CLASS_MEDIATOR	0.174045	0.79621	0.709448	0.339093	0.570814	0.401647
GOBP_INTRINSIC_APOPTOTIC_SIGNALING_PATHWAY_IN_RESPONSE_TO_DNA_DAMAGE	0.35469	1	0.891032	0.0956465	0.239967	0.16885
GOBP_INTRINSIC_APOPTOTIC_SIGNALING_PATHWAY_IN_RESPONSE_TO_DNA_DAMAGE_BY_P53_CLASS_MEDIATOR	0.0536592	0.344168	0.306665	0.224032	0.43882	0.308771
GOBP_INTRINSIC_APOPTOTIC_SIGNALING_PATHWAY_IN_RESPONSE_TO_ENDOPLASMIC_RETICULUM_STRESS	0.997797	1	0.891032	0.542456	0.764802	0.538145
GOBP_INTRINSIC_APOPTOTIC_SIGNALING_PATHWAY_IN_RESPONSE_TO_OXIDATIVE_STRESS	0.410377	1	0.891032	0.747986	0.927186	0.652404
GOBP_IONOTROPIC_GLUTAMATE_RECEPTOR_SIGNALING_PATHWAY	0.933147	1	0.891032	0.960823	1	0.703639
GOBP_IRE1_MEDIATED_UNFOLDED_PROTEIN_RESPONSE	0.101575	0.555857	0.495287	0.953413	1	0.703639
GOBP_IRES_DEPENDENT_VIRAL_TRANSLATIONAL_INITIATION	0.0796921	0.466626	0.415779	1	1	1
GOBP_IRON_COORDINATION_ENTITY_TRANSPORT	0.753944	1	0.891032	0.204863	0.407101	0.286452
GOBP_IRON_IMPORT_INTO_CELL	1	1	1	0.732662	0.911992	0.641713
GOBP_IRON_ION_HOMEOSTASIS	0.72304	1	0.891032	0.511907	0.738578	0.519693
GOBP_IRON_ION_TRANSMEMBRANE_TRANSPORT	1	1	1	0.649617	0.860608	0.605558
GOBP_IRON_ION_TRANSPORT	0.775683	1	0.891032	0.6817	0.889689	0.62602
GOBP_IRON_SULFUR_CLUSTER_ASSEMBLY	0.0222415	0.173733	0.154802	1	1	1
GOBP_ISOPRENOID_BIOSYNTHETIC_PROCESS	0.939526	1	0.891032	0.0326021	0.108224	0.0761507
GOBP_ISOPRENOID_CATABOLIC_PROCESS	1	1	1	0.0942319	0.238198	0.167605
GOBP_ISOPRENOID_METABOLIC_PROCESS	0.999925	1	0.891032	9.22e-07	2.88e-05	2.03e-05
GOBP_ISOTYPE_SWITCHING_TO_IGG_ISOTYPES	0.39091	1	0.891032	0.0152767	0.0628626	0.0442326
GOBP_JNK_CASCADE	0.132739	0.6791	0.6051	0.229495	0.447266	0.314714
GOBP_KERATAN_SULFATE_BIOSYNTHETIC_PROCESS	0.760924	1	0.891032	0.00063659	0.00562182	0.00395573
GOBP_KERATAN_SULFATE_CATABOLIC_PROCESS	1	1	1	0.00732624	0.0360426	0.025361
GOBP_KERATAN_SULFATE_METABOLIC_PROCESS	0.835852	1	0.891032	0.00264989	0.0164874	0.0116012
GOBP_KERATINIZATION	1	1	0.891032	0.0312338	0.105267	0.07407
GOBP_KERATINOCYTE_DEVELOPMENT	1	1	1	0.314433	0.541187	0.3808
GOBP_KERATINOCYTE_DIFFERENTIATION	1	1	0.891032	0.00360213	0.0209013	0.0147069
GOBP_KERATINOCYTE_MIGRATION	1	1	1	0.137747	0.309698	0.217916
GOBP_KERATINOCYTE_PROLIFERATION	0.991871	1	0.891032	0.0020173	0.0134506	0.00946434
GOBP_KETONE_BIOSYNTHETIC_PROCESS	0.206729	0.915689	0.815909	0.868175	0.985721	0.693592
GOBP_KETONE_BODY_METABOLIC_PROCESS	1	1	1	0.400195	0.625843	0.440367
GOBP_KETONE_CATABOLIC_PROCESS	1	1	1	0.441182	0.668447	0.470345
GOBP_KIDNEY_EPITHELIUM_DEVELOPMENT	0.999788	1	0.891032	2.56e-08	1.37e-06	9.65e-07
GOBP_KIDNEY_MESENCHYME_DEVELOPMENT	1	1	1	0.00342294	0.0200382	0.0140997
GOBP_KIDNEY_MORPHOGENESIS	0.973288	1	0.891032	7.68e-07	2.43e-05	1.71e-05
GOBP_KILLING_OF_CELLS_IN_OTHER_ORGANISM_INVOLVED_IN_SYMBIOTIC_INTERACTION	0.481909	1	0.891032	0.602142	0.814879	0.573381
GOBP_KILLING_OF_CELLS_OF_OTHER_ORGANISM	0.89236	1	0.891032	0.0706878	0.195241	0.137379
GOBP_KINETOCHORE_ASSEMBLY	0.00364127	0.0362105	0.0322648	1	1	1
GOBP_KINETOCHORE_ORGANIZATION	0.0145243	0.121791	0.108519	1	1	1
GOBP_KYNURENINE_METABOLIC_PROCESS	1	1	1	0.119101	0.277425	0.195207
GOBP_L_ALANINE_TRANSPORT	1	1	1	0.0942319	0.238198	0.167605
GOBP_L_ALPHA_AMINO_ACID_TRANSMEMBRANE_TRANSPORT	0.986199	1	0.891032	0.278818	0.508472	0.357781
GOBP_L_AMINO_ACID_TRANSPORT	0.989367	1	0.891032	0.20746	0.409464	0.288115
GOBP_L_ASCORBIC_ACID_METABOLIC_PROCESS	1	1	1	0.0942319	0.238198	0.167605
GOBP_L_ASPARTATE_TRANSMEMBRANE_TRANSPORT	1	1	1	0.35784	0.587853	0.413636
GOBP_L_GLUTAMATE_IMPORT_ACROSS_PLASMA_MEMBRANE	0.777404	1	0.891032	0.834565	0.965945	0.679677
GOBP_L_GLUTAMATE_TRANSMEMBRANE_TRANSPORT	0.918302	1	0.891032	0.950189	1	0.703639
GOBP_L_PHENYLALANINE_METABOLIC_PROCESS	1	1	1	0.119101	0.277425	0.195207
GOBP_L_SERINE_METABOLIC_PROCESS	1	1	1	0.0382082	0.121462	0.0854656
GOBP_LABYRINTHINE_LAYER_BLOOD_VESSEL_DEVELOPMENT	0.242518	0.991976	0.883883	0.61967	0.831347	0.584968
GOBP_LABYRINTHINE_LAYER_DEVELOPMENT	0.614473	1	0.891032	0.565014	0.783545	0.551333
GOBP_LABYRINTHINE_LAYER_MORPHOGENESIS	1	1	1	0.397267	0.625843	0.440367
GOBP_LACTATE_METABOLIC_PROCESS	0.777404	1	0.891032	1	1	1
GOBP_LACTATION	1	1	1	0.14201	0.31825	0.223933
GOBP_LAMELLIPODIUM_ASSEMBLY	0.53595	1	0.891032	0.427302	0.662005	0.465813
GOBP_LAMELLIPODIUM_MORPHOGENESIS	1	1	1	0.0978674	0.24292	0.170928
GOBP_LAMELLIPODIUM_ORGANIZATION	0.755531	1	0.891032	0.201728	0.407101	0.286452
GOBP_LATE_ENDOSOME_TO_VACUOLE_TRANSPORT	0.210554	0.925013	0.824217	1	1	1
GOBP_LATE_ENDOSOME_TO_VACUOLE_TRANSPORT_VIA_MULTIVESICULAR_BODY_SORTING_PATHWAY	0.216316	0.93398	0.832206	1	1	1
GOBP_LATERAL_MESODERM_DEVELOPMENT	1	1	1	0.813473	0.951613	0.669592
GOBP_LATERAL_SPROUTING_FROM_AN_EPITHELIUM	0.699351	1	0.891032	0.0382082	0.121462	0.0854656
GOBP_LATERAL_VENTRICLE_DEVELOPMENT	0.282488	1	0.891032	0.732662	0.911992	0.641713
GOBP_LAYER_FORMATION_IN_CEREBRAL_CORTEX	1	1	1	1	1	1
GOBP_LEARNING	0.881852	1	0.891032	0.034359	0.113329	0.0797426
GOBP_LEFT_RIGHT_AXIS_SPECIFICATION	1	1	1	1	1	1
GOBP_LEFT_RIGHT_PATTERN_FORMATION	1	1	1	1	1	1
GOBP_LENS_DEVELOPMENT_IN_CAMERA_TYPE_EYE	0.868912	1	0.891032	0.0483635	0.146063	0.102776
GOBP_LENS_FIBER_CELL_DEVELOPMENT	0.728013	1	0.891032	0.0503847	0.149958	0.105517
GOBP_LENS_FIBER_CELL_DIFFERENTIATION	0.955239	1	0.891032	0.053833	0.159072	0.111929
GOBP_LENS_MORPHOGENESIS_IN_CAMERA_TYPE_EYE	0.850918	1	0.891032	0.36512	0.59217	0.416674
GOBP_LEPTIN_MEDIATED_SIGNALING_PATHWAY	0.66767	1	0.891032	0.732662	0.911992	0.641713
GOBP_LEUKOCYTE_ADHESION_TO_VASCULAR_ENDOTHELIAL_CELL	0.99555	1	0.891032	0.00609798	0.0313591	0.0220655
GOBP_LEUKOCYTE_AGGREGATION	1	1	1	2.35e-09	1.71e-07	1.2e-07
GOBP_LEUKOCYTE_APOPTOTIC_PROCESS	0.990257	1	0.891032	1.68e-05	0.00029096	0.00020473
GOBP_LEUKOCYTE_CELL_CELL_ADHESION	1	1	0.891032	2.86e-15	1.02e-12	7.2e-13
GOBP_LEUKOCYTE_CHEMOTAXIS	1	1	0.891032	5.39e-17	2.51e-14	1.77e-14
GOBP_LEUKOCYTE_HOMEOSTASIS	0.950467	1	0.891032	0.00038258	0.00374058	0.00263202
GOBP_LEUKOCYTE_MEDIATED_CYTOTOXICITY	0.999816	1	0.891032	8.4e-05	0.00112658	0.0007927
GOBP_LEUKOCYTE_MIGRATION_INVOLVED_IN_INFLAMMATORY_RESPONSE	1	1	1	5.57e-07	1.89e-05	1.33e-05
GOBP_LEUKOCYTE_PROLIFERATION	1	1	0.891032	1.88e-11	2.37e-09	1.67e-09
GOBP_LEUKOCYTE_TETHERING_OR_ROLLING	1	1	1	0.015692	0.0640733	0.0450845
GOBP_LEUKOTRIENE_BIOSYNTHETIC_PROCESS	1	1	1	0.00645188	0.0327092	0.0230155
GOBP_LEUKOTRIENE_D4_METABOLIC_PROCESS	1	1	1	0.0942319	0.238198	0.167605
GOBP_LEUKOTRIENE_METABOLIC_PROCESS	1	1	1	0.00152509	0.0109371	0.00769577
GOBP_LEYDIG_CELL_DIFFERENTIATION	1	1	1	0.698587	0.894668	0.629523
GOBP_LIMB_BUD_FORMATION	1	1	1	0.35784	0.587853	0.413636
GOBP_LIMBIC_SYSTEM_DEVELOPMENT	0.996552	1	0.891032	0.7911	0.942866	0.663438
GOBP_LINOLEIC_ACID_METABOLIC_PROCESS	1	1	1	0.00137241	0.0100428	0.0070665
GOBP_LIPID_CATABOLIC_PROCESS	1	1	0.891032	9.28e-05	0.00121662	0.00085606
GOBP_LIPID_DIGESTION	1	1	1	0.0800829	0.213754	0.150406
GOBP_LIPID_DROPLET_FORMATION	1	1	1	0.35784	0.587853	0.413636
GOBP_LIPID_DROPLET_ORGANIZATION	1	1	1	0.182951	0.374111	0.26324
GOBP_LIPID_EXPORT_FROM_CELL	1	1	1	0.00054306	0.00501464	0.0035285
GOBP_LIPID_GLYCOSYLATION	1	1	1	1	1	1
GOBP_LIPID_HOMEOSTASIS	0.995891	1	0.891032	0.100609	0.248928	0.175155
GOBP_LIPID_IMPORT_INTO_CELL	0.96687	1	0.891032	0.0111948	0.0493843	0.0347487
GOBP_LIPID_MODIFICATION	0.978182	1	0.891032	0.166132	0.351878	0.247595
GOBP_LIPID_OXIDATION	0.983084	1	0.891032	0.112152	0.271287	0.190888
GOBP_LIPID_PHOSPHORYLATION	0.828025	1	0.891032	0.427302	0.662005	0.465813
GOBP_LIPID_STORAGE	0.967085	1	0.891032	0.159183	0.341386	0.240212
GOBP_LIPID_TRANSLOCATION	0.524274	1	0.891032	0.932376	1	0.703639
GOBP_LIPOPOLYSACCHARIDE_MEDIATED_SIGNALING_PATHWAY	0.978772	1	0.891032	4.38e-05	0.00065335	0.00045973
GOBP_LIPOPROTEIN_BIOSYNTHETIC_PROCESS	0.00305984	0.0315625	0.0281232	0.995474	1	0.703639
GOBP_LIPOPROTEIN_CATABOLIC_PROCESS	0.425503	1	0.891032	0.518193	0.738578	0.519693
GOBP_LIPOPROTEIN_LOCALIZATION	0.798628	1	0.891032	0.0978674	0.24292	0.170928
GOBP_LIPOPROTEIN_METABOLIC_PROCESS	0.0269187	0.203506	0.18133	0.971009	1	0.703639
GOBP_LIPOSACCHARIDE_METABOLIC_PROCESS	0.379153	1	0.891032	0.946546	1	0.703639
GOBP_LIPOXYGENASE_PATHWAY	1	1	1	0.00105455	0.00823473	0.00579428
GOBP_LIVER_MORPHOGENESIS	1	1	1	0.0944296	0.238198	0.167605
GOBP_LIVER_REGENERATION	0.808851	1	0.891032	0.26888	0.49345	0.347211
GOBP_LOCALIZATION_WITHIN_MEMBRANE	0.978446	1	0.891032	0.0193064	0.0752815	0.052971
GOBP_LOCOMOTOR_RHYTHM	1	1	1	1	1	1
GOBP_LOCOMOTORY_BEHAVIOR	0.999591	1	0.891032	0.0619461	0.177523	0.124912
GOBP_LOCOMOTORY_EXPLORATION_BEHAVIOR	1	1	1	0.0382082	0.121462	0.0854656
GOBP_LONG_CHAIN_FATTY_ACID_BIOSYNTHETIC_PROCESS	1	1	1	0.00264989	0.0164874	0.0116012
GOBP_LONG_CHAIN_FATTY_ACID_IMPORT_ACROSS_PLASMA_MEMBRANE	1	1	1	0.0194755	0.0752815	0.052971
GOBP_LONG_CHAIN_FATTY_ACID_IMPORT_INTO_CELL	1	1	1	0.00848257	0.0402015	0.0282873
GOBP_LONG_CHAIN_FATTY_ACID_METABOLIC_PROCESS	1	1	1	7.75e-08	3.47e-06	2.44e-06
GOBP_LONG_CHAIN_FATTY_ACID_TRANSPORT	0.993718	1	0.891032	0.00231487	0.0147783	0.0103986
GOBP_LONG_CHAIN_FATTY_ACYL_COA_BIOSYNTHETIC_PROCESS	1	1	1	0.36512	0.59217	0.416674
GOBP_LONG_CHAIN_FATTY_ACYL_COA_METABOLIC_PROCESS	0.918302	1	0.891032	0.310809	0.541187	0.3808
GOBP_LONG_TERM_MEMORY	0.599416	1	0.891032	0.890744	0.996999	0.701528
GOBP_LONG_TERM_SYNAPTIC_DEPRESSION	0.793915	1	0.891032	0.115478	0.277425	0.195207
GOBP_LONG_TERM_SYNAPTIC_POTENTIATION	0.999759	1	0.891032	0.334558	0.568052	0.399704
GOBP_LOOP_OF_HENLE_DEVELOPMENT	1	1	1	0.0279142	0.0954538	0.067165
GOBP_LOW_DENSITY_LIPOPROTEIN_PARTICLE_CLEARANCE	0.762673	1	0.891032	0.857156	0.978225	0.688318
GOBP_LOW_DENSITY_LIPOPROTEIN_PARTICLE_REMODELING	1	1	1	0.0354722	0.115689	0.0814031
GOBP_LOW_DENSITY_LIPOPROTEIN_RECEPTOR_PARTICLE_METABOLIC_PROCESS	0.39091	1	0.891032	1	1	1
GOBP_LUNG_ALVEOLUS_DEVELOPMENT	0.715309	1	0.891032	0.00247063	0.0155173	0.0109186
GOBP_LUNG_CELL_DIFFERENTIATION	0.60788	1	0.891032	0.919484	1	0.703639
GOBP_LUNG_EPITHELIUM_DEVELOPMENT	0.641222	1	0.891032	0.179579	0.37112	0.261135
GOBP_LUNG_MORPHOGENESIS	0.848464	1	0.891032	0.0394058	0.123415	0.0868395
GOBP_LUTEINIZATION	1	1	1	0.698587	0.894668	0.629523
GOBP_LYMPH_NODE_DEVELOPMENT	0.4914	1	0.891032	0.300204	0.535512	0.376807
GOBP_LYMPH_VESSEL_DEVELOPMENT	1	1	1	0.337637	0.569596	0.40079
GOBP_LYMPH_VESSEL_MORPHOGENESIS	1	1	1	0.207162	0.409223	0.287946
GOBP_LYMPHANGIOGENESIS	1	1	1	0.117066	0.277425	0.195207
GOBP_LYMPHOCYTE_ACTIVATION_INVOLVED_IN_IMMUNE_RESPONSE	0.954256	1	0.891032	0.00013572	0.00164496	0.00115746
GOBP_LYMPHOCYTE_APOPTOTIC_PROCESS	0.916336	1	0.891032	0.0118801	0.0514804	0.0362236
GOBP_LYMPHOCYTE_CHEMOTAXIS	0.998198	1	0.891032	0.00136855	0.0100428	0.0070665
GOBP_LYMPHOCYTE_COSTIMULATION	0.980515	1	0.891032	0.00019657	0.00222586	0.0015662
GOBP_LYMPHOCYTE_HOMEOSTASIS	0.918246	1	0.891032	0.0097885	0.0450994	0.0317337
GOBP_LYMPHOCYTE_MEDIATED_IMMUNITY	0.999998	1	0.891032	0.0358009	0.116679	0.0820998
GOBP_LYMPHOCYTE_MIGRATION	0.999895	1	0.891032	4.27e-07	1.52e-05	1.07e-05
GOBP_LYMPHOID_PROGENITOR_CELL_DIFFERENTIATION	0.133475	0.6791	0.6051	0.919484	1	0.703639
GOBP_LYSINE_METABOLIC_PROCESS	1	1	1	0.174769	0.362791	0.255274
GOBP_LYSOSOMAL_LUMEN_ACIDIFICATION	0.00130516	0.0150274	0.0133899	1	1	1
GOBP_LYSOSOMAL_PROTEIN_CATABOLIC_PROCESS	0.142388	0.705384	0.62852	0.204863	0.407101	0.286452
GOBP_LYSOSOMAL_TRANSPORT	0.00844563	0.076437	0.0681078	0.98947	1	0.703639
GOBP_LYSOSOME_LOCALIZATION	0.0216941	0.171062	0.152422	0.00315086	0.0186804	0.0131443
GOBP_LYTIC_VACUOLE_ORGANIZATION	0.00647201	0.0613782	0.0546899	0.558979	0.777957	0.547401
GOBP_MACROAUTOPHAGY	2.01e-07	5.81e-06	5.18e-06	0.999408	1	0.703639
GOBP_MACROMOLECULE_DEACYLATION	0.23719	0.991976	0.883883	0.800816	0.951493	0.669508
GOBP_MACROMOLECULE_DEPALMITOYLATION	0.39091	1	0.891032	1	1	1
GOBP_MACROMOLECULE_METHYLATION	4.15e-08	1.39e-06	1.24e-06	1	1	0.703639
GOBP_MACROPHAGE_ACTIVATION	0.99752	1	0.891032	1.68e-05	0.00029096	0.00020473
GOBP_MACROPHAGE_ACTIVATION_INVOLVED_IN_IMMUNE_RESPONSE	1	1	1	0.0446818	0.137547	0.0967838
GOBP_MACROPHAGE_APOPTOTIC_PROCESS	1	1	1	0.732662	0.911992	0.641713
GOBP_MACROPHAGE_CHEMOTAXIS	0.977822	1	0.891032	0.0586021	0.168771	0.118754
GOBP_MACROPHAGE_CYTOKINE_PRODUCTION	1	1	1	0.00065701	0.00567058	0.00399004
GOBP_MACROPHAGE_DIFFERENTIATION	0.991013	1	0.891032	0.0774487	0.210541	0.148145
GOBP_MACROPHAGE_MIGRATION	0.99508	1	0.891032	0.0005674	0.00517777	0.00364328
GOBP_MACROPHAGE_PROLIFERATION	1	1	1	0.400195	0.625843	0.440367
GOBP_MACROPINOCYTOSIS	1	1	1	0.314433	0.541187	0.3808
GOBP_MAGNESIUM_ION_HOMEOSTASIS	0.66767	1	0.891032	0.119101	0.277425	0.195207
GOBP_MAGNESIUM_ION_TRANSPORT	0.216316	0.93398	0.832206	0.869866	0.985721	0.693592
GOBP_MAINTENANCE_OF_APICAL_BASAL_CELL_POLARITY	0.632654	1	0.891032	0.698587	0.894668	0.629523
GOBP_MAINTENANCE_OF_BLOOD_BRAIN_BARRIER	0.835852	1	0.891032	0.000676	0.00578325	0.00406932
GOBP_MAINTENANCE_OF_CELL_NUMBER	0.0067365	0.0634073	0.056498	0.312305	0.541187	0.3808
GOBP_MAINTENANCE_OF_CELL_POLARITY	0.835202	1	0.891032	0.137747	0.309698	0.217916
GOBP_MAINTENANCE_OF_GASTROINTESTINAL_EPITHELIUM	0.889635	1	0.891032	0.00194502	0.0131	0.00921768
GOBP_MAINTENANCE_OF_LOCATION	0.986085	1	0.891032	0.00258366	0.0161835	0.0113873
GOBP_MAINTENANCE_OF_LOCATION_IN_CELL	0.941771	1	0.891032	0.00205697	0.0135597	0.00954111
GOBP_MAINTENANCE_OF_ORGANELLE_LOCATION	1	1	1	1	1	1
GOBP_MAINTENANCE_OF_PROTEIN_LOCALIZATION_IN_ENDOPLASMIC_RETICULUM	0.142388	0.705384	0.62852	0.480568	0.705096	0.496133
GOBP_MAINTENANCE_OF_PROTEIN_LOCALIZATION_IN_ORGANELLE	0.0156869	0.128394	0.114403	0.522141	0.739514	0.520351
GOBP_MAINTENANCE_OF_PROTEIN_LOCATION	0.163749	0.777612	0.692877	0.344131	0.578608	0.407131
GOBP_MAINTENANCE_OF_PROTEIN_LOCATION_IN_CELL	0.0799127	0.467191	0.416283	0.181516	0.374111	0.26324
GOBP_MAINTENANCE_OF_PROTEIN_LOCATION_IN_NUCLEUS	0.0616126	0.38098	0.339466	0.750873	0.927186	0.652404
GOBP_MAINTENANCE_OF_SISTER_CHROMATID_COHESION	0.00348632	0.0350962	0.0312719	1	1	1
GOBP_MAINTENANCE_OF_SYNAPSE_STRUCTURE	0.798628	1	0.891032	0.853273	0.976915	0.687396
GOBP_MALE_GENITALIA_DEVELOPMENT	0.865136	1	0.891032	0.677656	0.886399	0.623705
GOBP_MALE_MEIOSIS_I	0.900163	1	0.891032	0.93667	1	0.703639
GOBP_MALE_MEIOTIC_NUCLEAR_DIVISION	0.449135	1	0.891032	0.996004	1	0.703639
GOBP_MALE_SEX_DETERMINATION	1	1	1	0.314433	0.541187	0.3808
GOBP_MALE_SEX_DIFFERENTIATION	0.997411	1	0.891032	0.0124256	0.0534958	0.0376417
GOBP_MAMMARY_GLAND_ALVEOLUS_DEVELOPMENT	1	1	1	0.0354722	0.115689	0.0814031
GOBP_MAMMARY_GLAND_DEVELOPMENT	0.996384	1	0.891032	5.36e-05	0.00077274	0.00054373
GOBP_MAMMARY_GLAND_DUCT_MORPHOGENESIS	0.506769	1	0.891032	0.0102144	0.0463331	0.0326018
GOBP_MAMMARY_GLAND_EPITHELIAL_CELL_DIFFERENTIATION	0.753944	1	0.891032	0.480568	0.705096	0.496133
GOBP_MAMMARY_GLAND_EPITHELIAL_CELL_PROLIFERATION	0.723447	1	0.891032	0.337637	0.569596	0.40079
GOBP_MAMMARY_GLAND_EPITHELIUM_DEVELOPMENT	0.729076	1	0.891032	0.0221686	0.0824062	0.0579842
GOBP_MAMMARY_GLAND_MORPHOGENESIS	0.747643	1	0.891032	0.00112955	0.00868961	0.00611435
GOBP_MANGANESE_ION_TRANSPORT	1	1	1	0.518193	0.738578	0.519693
GOBP_MANNOSYLATION	0.0504791	0.328245	0.292477	0.98671	1	0.703639
GOBP_MAST_CELL_ACTIVATION	0.982119	1	0.891032	4.99e-06	0.00011302	7.95e-05
GOBP_MAST_CELL_ACTIVATION_INVOLVED_IN_IMMUNE_RESPONSE	0.946406	1	0.891032	3.24e-05	0.0005053	0.00035555
GOBP_MAST_CELL_MIGRATION	0.753944	1	0.891032	0.0152767	0.0628626	0.0442326
GOBP_MATERNAL_PLACENTA_DEVELOPMENT	0.760924	1	0.891032	0.00274507	0.0168099	0.0118281
GOBP_MATERNAL_PROCESS_INVOLVED_IN_FEMALE_PREGNANCY	0.97482	1	0.891032	6.37e-06	0.00013482	9.49e-05
GOBP_MATING	1	1	1	0.635946	0.849267	0.597577
GOBP_MATING_BEHAVIOR	1	1	1	0.919484	1	0.703639
GOBP_MATURATION_OF_5_8S_RRNA	0.00027371	0.0039333	0.0035047	1	1	1
GOBP_MATURATION_OF_5_8S_RRNA_FROM_TRICISTRONIC_RRNA_TRANSCRIPT_SSU_RRNA_5_8S_RRNA_LSU_RRNA	0.0222415	0.173733	0.154802	1	1	1
GOBP_MATURATION_OF_LSU_RRNA	0.00015774	0.00243401	0.00216878	1	1	1
GOBP_MATURATION_OF_LSU_RRNA_FROM_TRICISTRONIC_RRNA_TRANSCRIPT_SSU_RRNA_5_8S_RRNA_LSU_RRNA	0.0477187	0.312998	0.278892	1	1	1
GOBP_MATURATION_OF_SSU_RRNA	0.00062406	0.00793782	0.00707286	1	1	1
GOBP_MATURATION_OF_SSU_RRNA_FROM_TRICISTRONIC_RRNA_TRANSCRIPT_SSU_RRNA_5_8S_RRNA_LSU_RRNA	0.00189113	0.0209564	0.0186728	1	1	1
GOBP_MATURE_B_CELL_DIFFERENTIATION	1	1	1	0.00586694	0.0305422	0.0214907
GOBP_MATURE_B_CELL_DIFFERENTIATION_INVOLVED_IN_IMMUNE_RESPONSE	1	1	1	0.0220987	0.0823439	0.0579404
GOBP_MDA_5_SIGNALING_PATHWAY	1	1	1	0.314433	0.541187	0.3808
GOBP_MECHANORECEPTOR_DIFFERENTIATION	0.998008	1	0.891032	0.0857114	0.225113	0.158399
GOBP_MECHANOSENSORY_BEHAVIOR	1	1	1	0.400195	0.625843	0.440367
GOBP_MEDIUM_CHAIN_FATTY_ACID_METABOLIC_PROCESS	1	1	1	0.480568	0.705096	0.496133
GOBP_MEGAKARYOCYTE_DEVELOPMENT	0.798628	1	0.891032	0.267886	0.49345	0.347211
GOBP_MEGAKARYOCYTE_DIFFERENTIATION	0.850996	1	0.891032	0.810226	0.951613	0.669592
GOBP_MEIOSIS_I_CELL_CYCLE_PROCESS	0.0898951	0.515938	0.459717	0.999783	1	0.703639
GOBP_MEIOTIC_CELL_CYCLE	0.0773324	0.461386	0.41111	0.999969	1	0.703639
GOBP_MEIOTIC_CELL_CYCLE_PHASE_TRANSITION	1	1	1	0.314433	0.541187	0.3808
GOBP_MEIOTIC_CELL_CYCLE_PROCESS	0.268615	1	0.891032	0.996909	1	0.703639
GOBP_MEIOTIC_CHROMOSOME_SEGREGATION	0.13813	0.697131	0.621166	0.99827	1	0.703639
GOBP_MEIOTIC_CHROMOSOME_SEPARATION	0.210554	0.925013	0.824217	1	1	1
GOBP_MEIOTIC_SPINDLE_ORGANIZATION	1	1	1	0.762886	0.928713	0.653479
GOBP_MELANOCYTE_DIFFERENTIATION	0.909686	1	0.891032	0.0465032	0.141733	0.0997287
GOBP_MEMBRANE_BIOGENESIS	0.351666	1	0.891032	0.0139124	0.0590771	0.0415689
GOBP_MEMBRANE_DEPOLARIZATION	0.999839	1	0.891032	0.179845	0.371503	0.261404
GOBP_MEMBRANE_DEPOLARIZATION_DURING_ACTION_POTENTIAL	1	1	1	0.384928	0.618382	0.435118
GOBP_MEMBRANE_DEPOLARIZATION_DURING_CARDIAC_MUSCLE_CELL_ACTION_POTENTIAL	1	1	1	0.232213	0.449879	0.316552
GOBP_MEMBRANE_DISASSEMBLY	0.425503	1	0.891032	0.0208235	0.0782815	0.0550819
GOBP_MEMBRANE_DISRUPTION_IN_OTHER_ORGANISM	1	1	1	0.35784	0.587853	0.413636
GOBP_MEMBRANE_DOCKING	1.15e-07	3.59e-06	3.2e-06	0.975635	1	0.703639
GOBP_MEMBRANE_FISSION	0.425503	1	0.891032	0.236007	0.449879	0.316552
GOBP_MEMBRANE_FUSION	0.769819	1	0.891032	0.481322	0.705757	0.496598
GOBP_MEMBRANE_HYPERPOLARIZATION	0.753944	1	0.891032	0.480568	0.705096	0.496133
GOBP_MEMBRANE_INVAGINATION	0.910289	1	0.891032	0.194252	0.394874	0.277849
GOBP_MEMBRANE_LIPID_BIOSYNTHETIC_PROCESS	0.55241	1	0.891032	0.796921	0.947833	0.666933
GOBP_MEMBRANE_LIPID_CATABOLIC_PROCESS	0.888873	1	0.891032	0.25464	0.478633	0.336785
GOBP_MEMBRANE_LIPID_METABOLIC_PROCESS	0.579297	1	0.891032	0.72156	0.911992	0.641713
GOBP_MEMBRANE_PROTEIN_ECTODOMAIN_PROTEOLYSIS	0.576842	1	0.891032	0.336431	0.569596	0.40079
GOBP_MEMBRANE_PROTEIN_INTRACELLULAR_DOMAIN_PROTEOLYSIS	0.035951	0.254907	0.22713	0.677656	0.886399	0.623705
GOBP_MEMBRANE_PROTEIN_PROTEOLYSIS	0.361675	1	0.891032	0.383995	0.617737	0.434664
GOBP_MEMBRANE_RAFT_ASSEMBLY	0.66767	1	0.891032	0.35784	0.587853	0.413636
GOBP_MEMBRANE_RAFT_ORGANIZATION	0.430509	1	0.891032	0.0555532	0.162199	0.114129
GOBP_MEMBRANE_REPOLARIZATION	1	1	1	0.763819	0.929121	0.653766
GOBP_MEMBRANE_REPOLARIZATION_DURING_ACTION_POTENTIAL	1	1	1	0.391385	0.625843	0.440367
GOBP_MEMBRANE_REPOLARIZATION_DURING_VENTRICULAR_CARDIAC_MUSCLE_CELL_ACTION_POTENTIAL	1	1	1	0.853273	0.976915	0.687396
GOBP_MEMORY	0.894254	1	0.891032	0.321504	0.55071	0.387501
GOBP_MESENCHYMAL_CELL_APOPTOTIC_PROCESS	1	1	1	0.0382082	0.121462	0.0854656
GOBP_MESENCHYMAL_CELL_DIFFERENTIATION	0.999993	1	0.891032	7.76e-09	4.88e-07	3.43e-07
GOBP_MESENCHYMAL_CELL_PROLIFERATION	1	1	1	7.25e-06	0.00014728	0.00010363
GOBP_MESENCHYMAL_TO_EPITHELIAL_TRANSITION	1	1	1	0.00342294	0.0200382	0.0140997
GOBP_MESENCHYMAL_TO_EPITHELIAL_TRANSITION_INVOLVED_IN_METANEPHROS_MORPHOGENESIS	1	1	1	0.00732624	0.0360426	0.025361
GOBP_MESENCHYME_DEVELOPMENT	0.999994	1	0.891032	4.52e-09	2.88e-07	2.03e-07
GOBP_MESENCHYME_MORPHOGENESIS	0.954598	1	0.891032	0.00022118	0.00244509	0.00172046
GOBP_MESODERM_DEVELOPMENT	0.95496	1	0.891032	0.019421	0.0752815	0.052971
GOBP_MESODERM_MORPHOGENESIS	0.968444	1	0.891032	0.0232988	0.085112	0.0598882
GOBP_MESODERMAL_CELL_DIFFERENTIATION	1	1	1	0.00205174	0.0135597	0.00954111
GOBP_MESODERMAL_CELL_FATE_COMMITMENT	1	1	1	0.0275341	0.0954538	0.067165
GOBP_MESODERMAL_CELL_FATE_SPECIFICATION	1	1	1	0.0279142	0.0954538	0.067165
GOBP_MESONEPHRIC_TUBULE_MORPHOGENESIS	0.980515	1	0.891032	0.00063381	0.00562182	0.00395573
GOBP_MESONEPHROS_DEVELOPMENT	0.998853	1	0.891032	0.00014849	0.00177196	0.00124682
GOBP_METAL_ION_EXPORT	1	1	1	0.644361	0.85828	0.603919
GOBP_METAL_ION_TRANSPORT	0.999998	1	0.891032	7.58e-05	0.00103112	0.00072553
GOBP_METANEPHRIC_COLLECTING_DUCT_DEVELOPMENT	1	1	1	0.35784	0.587853	0.413636
GOBP_METANEPHRIC_EPITHELIUM_DEVELOPMENT	1	1	1	0.0555532	0.162199	0.114129
GOBP_METANEPHRIC_GLOMERULUS_DEVELOPMENT	1	1	1	0.236007	0.449879	0.316552
GOBP_METANEPHRIC_MESENCHYME_DEVELOPMENT	1	1	1	0.00065701	0.00567058	0.00399004
GOBP_METANEPHRIC_NEPHRON_DEVELOPMENT	1	1	1	0.00088005	0.00712305	0.00501206
GOBP_METANEPHRIC_NEPHRON_MORPHOGENESIS	1	1	1	0.00483136	0.0258192	0.0181674
GOBP_METANEPHRIC_RENAL_VESICLE_MORPHOGENESIS	1	1	1	0.0208235	0.0782815	0.0550819
GOBP_METANEPHRIC_TUBULE_DEVELOPMENT	1	1	1	0.0250999	0.090344	0.0635696
GOBP_METANEPHRIC_TUBULE_MORPHOGENESIS	1	1	1	0.0942319	0.238198	0.167605
GOBP_METANEPHROS_DEVELOPMENT	0.999733	1	0.891032	7.93e-05	0.00107304	0.00075503
GOBP_METANEPHROS_MORPHOGENESIS	1	1	1	0.00156725	0.0111319	0.00783285
GOBP_METAPHASE_ANAPHASE_TRANSITION_OF_CELL_CYCLE	7.21e-05	0.00118794	0.0010585	0.863146	0.983856	0.692279
GOBP_METAPHASE_PLATE_CONGRESSION	0.152197	0.737134	0.656811	0.980682	1	0.703639
GOBP_METENCEPHALON_DEVELOPMENT	0.498232	1	0.891032	0.352606	0.587853	0.413636
GOBP_METHIONINE_BIOSYNTHETIC_PROCESS	1	1	1	0.762886	0.928713	0.653479
GOBP_METHIONINE_METABOLIC_PROCESS	1	1	1	0.553951	0.771882	0.543127
GOBP_METHYLATION	6.32e-07	1.74e-05	1.55e-05	1	1	0.703639
GOBP_MHC_CLASS_II_BIOSYNTHETIC_PROCESS	1	1	1	0.300204	0.535512	0.376807
GOBP_MICROGLIAL_CELL_ACTIVATION	1	1	1	0.00163768	0.0114785	0.00807674
GOBP_MICROTUBULE_ANCHORING	0.252927	1	0.891032	1	1	1
GOBP_MICROTUBULE_ANCHORING_AT_CENTROSOME	0.282488	1	0.891032	1	1	1
GOBP_MICROTUBULE_ANCHORING_AT_MICROTUBULE_ORGANIZING_CENTER	0.355407	1	0.891032	1	1	1
GOBP_MICROTUBULE_BASED_MOVEMENT	0.614833	1	0.891032	0.989349	1	0.703639
GOBP_MICROTUBULE_BASED_TRANSPORT	0.127455	0.657356	0.585725	0.946602	1	0.703639
GOBP_MICROTUBULE_BUNDLE_FORMATION	0.894254	1	0.891032	0.22469	0.43882	0.308771
GOBP_MICROTUBULE_CYTOSKELETON_ORGANIZATION_INVOLVED_IN_MITOSIS	0.0859731	0.497218	0.443037	0.895746	0.999426	0.703235
GOBP_MICROTUBULE_DEPOLYMERIZATION	0.614473	1	0.891032	0.565014	0.783545	0.551333
GOBP_MICROTUBULE_NUCLEATION	0.0202305	0.162059	0.1444	1	1	1
GOBP_MICROTUBULE_ORGANIZING_CENTER_LOCALIZATION	0.319143	1	0.891032	0.674607	0.886399	0.623705
GOBP_MICROTUBULE_ORGANIZING_CENTER_ORGANIZATION	0.00068657	0.00864527	0.00770322	0.997046	1	0.703639
GOBP_MICROTUBULE_POLYMERIZATION	0.112653	0.605911	0.539886	0.249452	0.470401	0.330993
GOBP_MICROTUBULE_POLYMERIZATION_OR_DEPOLYMERIZATION	0.124198	0.641432	0.571537	0.305201	0.541187	0.3808
GOBP_MICROTUBULE_SEVERING	0.0990017	0.549577	0.489691	1	1	1
GOBP_MICROVILLUS_ASSEMBLY	0.798628	1	0.891032	0.0275341	0.0954538	0.067165
GOBP_MICROVILLUS_ORGANIZATION	0.909686	1	0.891032	2.29e-05	0.00036953	0.00026001
GOBP_MIDBODY_ABSCISSION	1	1	1	0.587784	0.801273	0.563807
GOBP_MIDBRAIN_DEVELOPMENT	0.0152743	0.126559	0.112768	0.0302331	0.102555	0.0721615
GOBP_MIDBRAIN_DOPAMINERGIC_NEURON_DIFFERENTIATION	0.459037	1	0.891032	0.0978674	0.24292	0.170928
GOBP_MIDDLE_EAR_MORPHOGENESIS	0.81783	1	0.891032	0.300204	0.535512	0.376807
GOBP_MIDGUT_DEVELOPMENT	1	1	1	0.174769	0.362791	0.255274
GOBP_MINERALOCORTICOID_METABOLIC_PROCESS	1	1	1	0.174769	0.362791	0.255274
GOBP_MIRNA_CATABOLIC_PROCESS	0.632654	1	0.891032	0.698587	0.894668	0.629523
GOBP_MIRNA_METABOLIC_PROCESS	0.0523106	0.336666	0.29998	0.969188	1	0.703639
GOBP_MISMATCH_REPAIR	0.148579	0.728384	0.649013	1	1	1
GOBP_MITOCHONDRIAL_ATP_SYNTHESIS_COUPLED_PROTON_TRANSPORT	1.4e-07	4.19e-06	3.73e-06	1	1	1
GOBP_MITOCHONDRIAL_CALCIUM_ION_HOMEOSTASIS	0.723447	1	0.891032	0.163259	0.346236	0.243625
GOBP_MITOCHONDRIAL_CALCIUM_ION_TRANSMEMBRANE_TRANSPORT	0.0832237	0.484293	0.43152	0.791327	0.942866	0.663438
GOBP_MITOCHONDRIAL_CYTOCHROME_C_OXIDASE_ASSEMBLY	0.00331906	0.0338652	0.030175	1	1	1
GOBP_MITOCHONDRIAL_DEPOLARIZATION	0.889635	1	0.891032	0.0313042	0.105267	0.07407
GOBP_MITOCHONDRIAL_DNA_METABOLIC_PROCESS	0.355407	1	0.891032	1	1	1
GOBP_MITOCHONDRIAL_DNA_REPLICATION	0.0990017	0.549577	0.489691	1	1	1
GOBP_MITOCHONDRIAL_ELECTRON_TRANSPORT_CYTOCHROME_C_TO_OXYGEN	0.00043653	0.00582815	0.00519307	0.703835	0.897192	0.631299
GOBP_MITOCHONDRIAL_ELECTRON_TRANSPORT_NADH_TO_UBIQUINONE	6.03e-14	4.83e-12	4.3e-12	1	1	1
GOBP_MITOCHONDRIAL_ELECTRON_TRANSPORT_UBIQUINOL_TO_CYTOCHROME_C	0.00749689	0.0686759	0.0611925	1	1	1
GOBP_MITOCHONDRIAL_FISSION	0.042233	0.286499	0.25528	0.0419808	0.131039	0.0922039
GOBP_MITOCHONDRIAL_FUSION	0.0139051	0.117312	0.104529	0.391385	0.625843	0.440367
GOBP_MITOCHONDRIAL_GENE_EXPRESSION	3.57e-40	2.69e-37	2.4e-37	1	1	1
GOBP_MITOCHONDRIAL_GENOME_MAINTENANCE	0.323272	1	0.891032	0.703835	0.897192	0.631299
GOBP_MITOCHONDRIAL_MEMBRANE_ORGANIZATION	4.23e-06	9.89e-05	8.82e-05	0.99786	1	0.703639
GOBP_MITOCHONDRIAL_OUTER_MEMBRANE_PERMEABILIZATION	0.781619	1	0.891032	0.599708	0.814664	0.57323
GOBP_MITOCHONDRIAL_PROTEIN_PROCESSING	0.0291138	0.214508	0.191133	0.789695	0.942866	0.663438
GOBP_MITOCHONDRIAL_RESPIRASOME_ASSEMBLY	0.632654	1	0.891032	0.698587	0.894668	0.629523
GOBP_MITOCHONDRIAL_RESPIRATORY_CHAIN_COMPLEX_ASSEMBLY	5.26e-22	1.04e-19	9.3e-20	1	1	1
GOBP_MITOCHONDRIAL_RNA_METABOLIC_PROCESS	0.468271	1	0.891032	1	1	1
GOBP_MITOCHONDRIAL_RNA_PROCESSING	0.81783	1	0.891032	1	1	1
GOBP_MITOCHONDRIAL_TRANSCRIPTION	0.216316	0.93398	0.832206	1	1	1
GOBP_MITOCHONDRIAL_TRANSLATION	4.01e-46	5.03e-43	4.48e-43	1	1	1
GOBP_MITOCHONDRIAL_TRANSLATIONAL_TERMINATION	5.92e-50	2.23e-46	1.99e-46	1	1	1
GOBP_MITOCHONDRIAL_TRANSMEMBRANE_TRANSPORT	0.00054025	0.00706262	0.00629302	0.99997	1	0.703639
GOBP_MITOCHONDRIAL_TRANSPORT	5.29e-06	0.00012298	0.00010958	0.999892	1	0.703639
GOBP_MITOCHONDRIAL_TRNA_PROCESSING	0.728013	1	0.891032	1	1	1
GOBP_MITOCHONDRION_DISTRIBUTION	0.459037	1	0.891032	0.267886	0.49345	0.347211
GOBP_MITOCHONDRION_LOCALIZATION	0.468271	1	0.891032	0.277537	0.507328	0.356976
GOBP_MITOCHONDRION_MORPHOGENESIS	0.100275	0.550345	0.490375	0.897637	0.999426	0.703235
GOBP_MITOPHAGY	0.0719734	0.432185	0.38509	1	1	1
GOBP_MITOTIC_CELL_CYCLE_ARREST	0.81783	1	0.891032	0.300204	0.535512	0.376807
GOBP_MITOTIC_CELL_CYCLE_CHECKPOINT	0.00020856	0.00312847	0.00278757	0.871736	0.987359	0.694745
GOBP_MITOTIC_CHROMOSOME_CONDENSATION	1	1	1	0.518193	0.738578	0.519693
GOBP_MITOTIC_CYTOKINESIS	0.349311	1	0.891032	0.263456	0.490449	0.345099
GOBP_MITOTIC_CYTOKINETIC_PROCESS	0.377373	1	0.891032	0.750873	0.927186	0.652404
GOBP_MITOTIC_DNA_INTEGRITY_CHECKPOINT	0.00223088	0.0238615	0.0212614	0.859656	0.980598	0.689987
GOBP_MITOTIC_DNA_REPLICATION	1	1	1	1	1	1
GOBP_MITOTIC_DNA_REPLICATION_CHECKPOINT	0.245616	0.991976	0.883883	1	1	1
GOBP_MITOTIC_G1_S_TRANSITION_CHECKPOINT	0.0147145	0.123111	0.109696	0.577913	0.795742	0.559915
GOBP_MITOTIC_G2_DNA_DAMAGE_CHECKPOINT	0.0719734	0.432185	0.38509	0.519773	0.738578	0.519693
GOBP_MITOTIC_G2_M_TRANSITION_CHECKPOINT	0.00673086	0.0634073	0.056498	0.614439	0.82887	0.583225
GOBP_MITOTIC_METAPHASE_PLATE_CONGRESSION	0.0988832	0.549577	0.489691	0.981749	1	0.703639
GOBP_MITOTIC_NUCLEAR_DIVISION	0.00199286	0.0220033	0.0196056	0.819119	0.956075	0.672732
GOBP_MITOTIC_NUCLEAR_ENVELOPE_DISASSEMBLY	1	1	1	0.00732624	0.0360426	0.025361
GOBP_MITOTIC_NUCLEAR_MEMBRANE_ORGANIZATION	0.245616	0.991976	0.883883	1	1	1
GOBP_MITOTIC_RECOMBINATION	0.00568824	0.0544942	0.0485561	1	1	1
GOBP_MITOTIC_SISTER_CHROMATID_COHESION	0.108303	0.589251	0.525042	1	1	1
GOBP_MITOTIC_SISTER_CHROMATID_SEGREGATION	0.00036363	0.00494245	0.00440388	0.996632	1	0.703639
GOBP_MITOTIC_SPINDLE_ASSEMBLY	0.0867874	0.501157	0.446547	0.757693	0.928713	0.653479
GOBP_MITOTIC_SPINDLE_ORGANIZATION	0.152517	0.737134	0.656811	0.927463	1	0.703639
GOBP_MITRAL_VALVE_DEVELOPMENT	1	1	1	0.35784	0.587853	0.413636
GOBP_MODIFICATION_OF_POSTSYNAPTIC_STRUCTURE	0.119968	0.627333	0.558974	0.441182	0.668447	0.470345
GOBP_MODIFICATION_OF_SYNAPTIC_STRUCTURE	0.100275	0.550345	0.490375	0.649617	0.860608	0.605558
GOBP_MODIFIED_AMINO_ACID_TRANSPORT	0.945296	1	0.891032	0.00358698	0.0208412	0.0146647
GOBP_MODULATION_BY_HOST_OF_SYMBIONT_PROCESS	0.235288	0.991976	0.883883	0.715756	0.910144	0.640413
GOBP_MODULATION_BY_HOST_OF_VIRAL_GENOME_REPLICATION	0.269188	1	0.891032	0.649617	0.860608	0.605558
GOBP_MODULATION_BY_HOST_OF_VIRAL_PROCESS	0.341567	1	0.891032	0.879899	0.993928	0.699367
GOBP_MODULATION_BY_SYMBIONT_OF_ENTRY_INTO_HOST	0.848464	1	0.891032	0.169058	0.356985	0.251189
GOBP_MODULATION_BY_SYMBIONT_OF_HOST_CELLULAR_PROCESS	0.404114	1	0.891032	0.771882	0.936407	0.658893
GOBP_MODULATION_BY_SYMBIONT_OF_HOST_PROCESS	0.474474	1	0.891032	0.614439	0.82887	0.583225
GOBP_MODULATION_BY_VIRUS_OF_HOST_CELLULAR_PROCESS	0.242518	0.991976	0.883883	0.884583	0.993928	0.699367
GOBP_MODULATION_BY_VIRUS_OF_HOST_PROCESS	0.296838	1	0.891032	0.651591	0.862733	0.607053
GOBP_MODULATION_OF_EXCITATORY_POSTSYNAPTIC_POTENTIAL	0.987854	1	0.891032	0.565014	0.783545	0.551333
GOBP_MODULATION_OF_PROCESS_OF_OTHER_ORGANISM	0.510294	1	0.891032	0.0977505	0.24292	0.170928
GOBP_MODULATION_OF_PROCESS_OF_OTHER_ORGANISM_INVOLVED_IN_SYMBIOTIC_INTERACTION	0.221377	0.950383	0.846822	0.681348	0.88948	0.625873
GOBP_MOLTING_CYCLE	0.942602	1	0.891032	0.00054634	0.00502845	0.00353821
GOBP_MONOACYLGLYCEROL_METABOLIC_PROCESS	0.753944	1	0.891032	0.204863	0.407101	0.286452
GOBP_MONOAMINE_TRANSPORT	0.996624	1	0.891032	0.277009	0.50716	0.356858
GOBP_MONOCARBOXYLIC_ACID_BIOSYNTHETIC_PROCESS	1	1	0.891032	6.92e-07	2.25e-05	1.58e-05
GOBP_MONOCARBOXYLIC_ACID_CATABOLIC_PROCESS	0.998951	1	0.891032	0.309333	0.541187	0.3808
GOBP_MONOCARBOXYLIC_ACID_TRANSPORT	1	1	0.891032	7.77e-05	0.00105433	0.00074187
GOBP_MONOCYTE_ACTIVATION	1	1	1	0.400195	0.625843	0.440367
GOBP_MONOCYTE_CHEMOTACTIC_PROTEIN_1_PRODUCTION	1	1	1	0.0446818	0.137547	0.0967838
GOBP_MONOCYTE_CHEMOTAXIS	1	1	1	0.00010699	0.00135311	0.0009521
GOBP_MONOCYTE_DIFFERENTIATION	0.869913	1	0.891032	0.104876	0.257978	0.181523
GOBP_MONONUCLEAR_CELL_DIFFERENTIATION	0.980147	1	0.891032	2.93e-11	3.32e-09	2.34e-09
GOBP_MONONUCLEAR_CELL_MIGRATION	0.999999	1	0.891032	5.41e-12	7.87e-10	5.54e-10
GOBP_MONOSACCHARIDE_BIOSYNTHETIC_PROCESS	0.584104	1	0.891032	0.870098	0.985743	0.693608
GOBP_MONOSACCHARIDE_CATABOLIC_PROCESS	0.998008	1	0.891032	0.401898	0.628083	0.441944
GOBP_MONOSACCHARIDE_METABOLIC_PROCESS	0.994418	1	0.891032	0.23007	0.448198	0.31537
GOBP_MONOVALENT_INORGANIC_ANION_HOMEOSTASIS	1	1	1	0.518193	0.738578	0.519693
GOBP_MONOVALENT_INORGANIC_CATION_HOMEOSTASIS	0.575931	1	0.891032	0.882654	0.993928	0.699367
GOBP_MORPHOGENESIS_OF_A_BRANCHING_STRUCTURE	0.97191	1	0.891032	3.05e-09	2.09e-07	1.47e-07
GOBP_MORPHOGENESIS_OF_A_POLARIZED_EPITHELIUM	8.08e-11	3.9e-09	3.47e-09	0.193929	0.394874	0.277849
GOBP_MORPHOGENESIS_OF_AN_ENDOTHELIUM	0.552313	1	0.891032	0.00342294	0.0200382	0.0140997
GOBP_MORPHOGENESIS_OF_AN_EPITHELIAL_BUD	0.777404	1	0.891032	0.00065701	0.00567058	0.00399004
GOBP_MORPHOGENESIS_OF_AN_EPITHELIAL_FOLD	0.900163	1	0.891032	0.011121	0.0491987	0.0346181
GOBP_MORPHOGENESIS_OF_AN_EPITHELIAL_SHEET	0.480075	1	0.891032	0.00051523	0.00479581	0.00337452
GOBP_MORPHOGENESIS_OF_EMBRYONIC_EPITHELIUM	0.790415	1	0.891032	0.00729432	0.0360426	0.025361
GOBP_MOTILE_CILIUM_ASSEMBLY	0.900163	1	0.891032	0.93667	1	0.703639
GOBP_MOTOR_BEHAVIOR	0.699351	1	0.891032	0.762886	0.928713	0.653479
GOBP_MOTOR_NEURON_AXON_GUIDANCE	0.950516	1	0.891032	0.115478	0.277425	0.195207
GOBP_MOVEMENT_IN_HOST_ENVIRONMENT	0.995253	1	0.891032	0.00404499	0.0231177	0.0162665
GOBP_MRNA_3_END_PROCESSING	6.84e-14	5.36e-12	4.78e-12	0.999993	1	0.703639
GOBP_MRNA_5_SPLICE_SITE_RECOGNITION	0.377373	1	0.891032	1	1	1
GOBP_MRNA_CIS_SPLICING_VIA_SPLICEOSOME	0.0244892	0.186266	0.165969	1	1	1
GOBP_MRNA_CLEAVAGE	0.00062904	0.00797421	0.00710528	1	1	1
GOBP_MRNA_CLEAVAGE_INVOLVED_IN_MRNA_PROCESSING	1.19e-05	0.00025074	0.00022342	1	1	1
GOBP_MRNA_EXPORT_FROM_NUCLEUS	5.52e-14	4.51e-12	4.02e-12	1	1	1
GOBP_MRNA_METHYLATION	0.0139279	0.117312	0.104529	1	1	1
GOBP_MRNA_MODIFICATION	0.0269719	0.203506	0.18133	0.950189	1	0.703639
GOBP_MRNA_SPLICE_SITE_SELECTION	0.0156605	0.128394	0.114403	0.997214	1	0.703639
GOBP_MRNA_TRANSCRIPTION	0.777404	1	0.891032	0.518193	0.738578	0.519693
GOBP_MRNA_TRANSCRIPTION_BY_RNA_POLYMERASE_II	0.632654	1	0.891032	0.314433	0.541187	0.3808
GOBP_MRNA_TRANSPORT	2.79e-11	1.48e-09	1.32e-09	1	1	0.703639
GOBP_MUCOPOLYSACCHARIDE_METABOLIC_PROCESS	0.987966	1	0.891032	0.00208758	0.0136647	0.00961502
GOBP_MULTI_MULTICELLULAR_ORGANISM_PROCESS	0.999998	1	0.891032	1.08e-08	6.53e-07	4.59e-07
GOBP_MULTI_ORGANISM_CELLULAR_PROCESS	0.798628	1	0.891032	0.0275341	0.0954538	0.067165
GOBP_MULTI_ORGANISM_LOCALIZATION	7.83e-06	0.00017229	0.00015352	0.880239	0.993928	0.699367
GOBP_MULTI_ORGANISM_MEMBRANE_ORGANIZATION	0.632654	1	0.891032	0.0942319	0.238198	0.167605
GOBP_MULTICELLULAR_ORGANISM_AGING	0.808851	1	0.891032	0.26888	0.49345	0.347211
GOBP_MULTICELLULAR_ORGANISM_GROWTH	0.173419	0.795279	0.708619	0.506654	0.7332	0.515908
GOBP_MULTICELLULAR_ORGANISMAL_MOVEMENT	0.97482	1	0.891032	0.00840396	0.0402015	0.0282873
GOBP_MULTICELLULAR_ORGANISMAL_RESPONSE_TO_STRESS	1	1	1	0.64454	0.85828	0.603919
GOBP_MULTICELLULAR_ORGANISMAL_SIGNALING	1	1	0.891032	0.354508	0.587853	0.413636
GOBP_MULTIVESICULAR_BODY_ORGANIZATION	0.341567	1	0.891032	1	1	1
GOBP_MULTIVESICULAR_BODY_SORTING_PATHWAY	0.474474	1	0.891032	0.932542	1	0.703639
GOBP_MUSCLE_ADAPTATION	0.973639	1	0.891032	0.693974	0.894668	0.629523
GOBP_MUSCLE_ATROPHY	1	1	1	0.441182	0.668447	0.470345
GOBP_MUSCLE_CELL_APOPTOTIC_PROCESS	0.98933	1	0.891032	0.746537	0.926996	0.652271
GOBP_MUSCLE_CELL_CELLULAR_HOMEOSTASIS	0.865136	1	0.891032	0.677656	0.886399	0.623705
GOBP_MUSCLE_CELL_DEVELOPMENT	0.999763	1	0.891032	0.00209383	0.0136863	0.00963025
GOBP_MUSCLE_CELL_DIFFERENTIATION	0.99997	1	0.891032	0.00018089	0.00207868	0.00146264
GOBP_MUSCLE_CELL_FATE_COMMITMENT	1	1	1	0.869866	0.985721	0.693592
GOBP_MUSCLE_CELL_MIGRATION	0.999961	1	0.891032	4.52e-06	0.00010405	7.32e-05
GOBP_MUSCLE_CELL_PROLIFERATION	0.999942	1	0.891032	0.00103028	0.00814078	0.00572817
GOBP_MUSCLE_CONTRACTION	1	1	0.891032	1.66e-08	9.42e-07	6.63e-07
GOBP_MUSCLE_FIBER_DEVELOPMENT	0.99508	1	0.891032	0.00515134	0.0272436	0.0191696
GOBP_MUSCLE_FILAMENT_SLIDING	1	1	1	0.0667373	0.186137	0.130973
GOBP_MUSCLE_HYPERTROPHY	0.969315	1	0.891032	0.896329	0.999426	0.703235
GOBP_MUSCLE_HYPERTROPHY_IN_RESPONSE_TO_STRESS	1	1	1	0.841129	0.971609	0.683662
GOBP_MUSCLE_ORGAN_DEVELOPMENT	0.999926	1	0.891032	5.25e-06	0.00011549	8.13e-05
GOBP_MUSCLE_ORGAN_MORPHOGENESIS	0.999341	1	0.891032	0.00665739	0.0335683	0.02362
GOBP_MUSCLE_SYSTEM_PROCESS	1	1	0.891032	4.3e-07	1.52e-05	1.07e-05
GOBP_MUSCLE_TISSUE_DEVELOPMENT	0.999955	1	0.891032	6.71e-05	0.00093254	0.00065617
GOBP_MYD88_DEPENDENT_TOLL_LIKE_RECEPTOR_SIGNALING_PATHWAY	0.110661	0.596904	0.531861	0.0380793	0.121462	0.0854656
GOBP_MYD88_INDEPENDENT_TOLL_LIKE_RECEPTOR_SIGNALING_PATHWAY	0.219058	0.9415	0.838907	0.338037	0.569596	0.40079
GOBP_MYELIN_ASSEMBLY	1	1	1	0.159763	0.341386	0.240212
GOBP_MYELIN_MAINTENANCE	1	1	1	0.117066	0.277425	0.195207
GOBP_MYELOID_CELL_APOPTOTIC_PROCESS	0.939526	1	0.891032	0.0326021	0.108224	0.0761507
GOBP_MYELOID_CELL_DEVELOPMENT	0.957431	1	0.891032	0.120592	0.280617	0.197453
GOBP_MYELOID_CELL_DIFFERENTIATION	0.896738	1	0.891032	0.00083036	0.00688676	0.0048458
GOBP_MYELOID_CELL_HOMEOSTASIS	0.408645	1	0.891032	0.0585169	0.168771	0.118754
GOBP_MYELOID_DENDRITIC_CELL_ACTIVATION	0.945296	1	0.891032	0.00358698	0.0208412	0.0146647
GOBP_MYELOID_DENDRITIC_CELL_DIFFERENTIATION	0.865136	1	0.891032	0.0197719	0.075673	0.0532465
GOBP_MYELOID_LEUKOCYTE_CYTOKINE_PRODUCTION	1	1	1	0.00629868	0.0320022	0.022518
GOBP_MYELOID_LEUKOCYTE_DIFFERENTIATION	0.995096	1	0.891032	7.4e-06	0.00014851	0.0001045
GOBP_MYELOID_LEUKOCYTE_MIGRATION	0.999999	1	0.891032	4.83e-15	1.5e-12	1.05e-12
GOBP_MYOBLAST_DIFFERENTIATION	0.889262	1	0.891032	0.00045673	0.00431163	0.00303383
GOBP_MYOBLAST_FUSION	0.983587	1	0.891032	0.0139124	0.0590771	0.0415689
GOBP_MYOBLAST_MIGRATION	0.728013	1	0.891032	0.0503847	0.149958	0.105517
GOBP_MYOBLAST_PROLIFERATION	0.909686	1	0.891032	0.771882	0.936407	0.658893
GOBP_MYOFIBRIL_ASSEMBLY	0.929087	1	0.891032	0.00063381	0.00562182	0.00395573
GOBP_MYOTUBE_CELL_DEVELOPMENT	1	1	1	0.0820916	0.216953	0.152657
GOBP_MYOTUBE_DIFFERENTIATION	0.999986	1	0.891032	0.012106	0.0523617	0.0368437
GOBP_N_ACETYLGLUCOSAMINE_METABOLIC_PROCESS	1	1	1	0.0152679	0.0628626	0.0442326
GOBP_N_ACETYLNEURAMINATE_METABOLIC_PROCESS	1	1	1	0.00470779	0.0256629	0.0180574
GOBP_N_GLYCAN_PROCESSING	1	1	1	0.649617	0.860608	0.605558
GOBP_N_TERMINAL_PROTEIN_AMINO_ACID_ACETYLATION	0.216316	0.93398	0.832206	1	1	1
GOBP_N_TERMINAL_PROTEIN_AMINO_ACID_MODIFICATION	0.296838	1	0.891032	1	1	1
GOBP_NAD_BIOSYNTHESIS_VIA_NICOTINAMIDE_RIBOSIDE_SALVAGE_PATHWAY	1	1	1	0.0644279	0.180958	0.127329
GOBP_NAD_BIOSYNTHETIC_PROCESS	1	1	1	0.00018526	0.00211843	0.00149061
GOBP_NAD_METABOLIC_PROCESS	0.993985	1	0.891032	0.00996143	0.0454961	0.0320128
GOBP_NADH_DEHYDROGENASE_COMPLEX_ASSEMBLY	2.53e-18	3.67e-16	3.27e-16	1	1	1
GOBP_NADH_METABOLIC_PROCESS	0.986572	1	0.891032	0.357411	0.587853	0.413636
GOBP_NADP_METABOLIC_PROCESS	0.970033	1	0.891032	0.197473	0.400452	0.281774
GOBP_NADPH_REGENERATION	0.835202	1	0.891032	0.61967	0.831347	0.584968
GOBP_NATURAL_KILLER_CELL_ACTIVATION	0.912122	1	0.891032	0.0878614	0.229981	0.161824
GOBP_NATURAL_KILLER_CELL_ACTIVATION_INVOLVED_IN_IMMUNE_RESPONSE	1	1	1	0.696481	0.894668	0.629523
GOBP_NATURAL_KILLER_CELL_CHEMOTAXIS	1	1	1	0.0279142	0.0954538	0.067165
GOBP_NATURAL_KILLER_CELL_DIFFERENTIATION	0.242518	0.991976	0.883883	0.137747	0.309698	0.217916
GOBP_NATURAL_KILLER_CELL_MEDIATED_IMMUNITY	0.998795	1	0.891032	0.00689957	0.0346393	0.0243736
GOBP_NATURAL_KILLER_CELL_PROLIFERATION	1	1	1	0.732662	0.911992	0.641713
GOBP_NCRNA_3_END_PROCESSING	0.00062406	0.00793782	0.00707286	0.981749	1	0.703639
GOBP_NCRNA_CATABOLIC_PROCESS	0.00189113	0.0209564	0.0186728	0.804677	0.951613	0.669592
GOBP_NCRNA_EXPORT_FROM_NUCLEUS	1.25e-07	3.79e-06	3.38e-06	1	1	1
GOBP_NCRNA_METABOLIC_PROCESS	2.5e-25	6.74e-23	6e-23	1	1	0.703639
GOBP_NCRNA_PROCESSING	3.36e-27	1.58e-24	1.41e-24	1	1	0.703639
GOBP_NCRNA_TRANSCRIPTION	4.08e-13	2.74e-11	2.44e-11	0.999998	1	0.703639
GOBP_NECROPTOTIC_PROCESS	0.790547	1	0.891032	0.207053	0.409223	0.287946
GOBP_NECROTIC_CELL_DEATH	0.954161	1	0.891032	0.0281653	0.0961007	0.0676202
GOBP_NEGATIVE_CHEMOTAXIS	0.941798	1	0.891032	2.38e-05	0.000381	0.00026809
GOBP_NEGATIVE_REGULATION_BY_HOST_OF_VIRAL_PROCESS	0.425503	1	0.891032	1	1	1
GOBP_NEGATIVE_REGULATION_BY_HOST_OF_VIRAL_TRANSCRIPTION	0.39091	1	0.891032	0.480568	0.705096	0.496133
GOBP_NEGATIVE_REGULATION_OF_ACTIN_FILAMENT_BUNDLE_ASSEMBLY	1	1	1	0.0820916	0.216953	0.152657
GOBP_NEGATIVE_REGULATION_OF_ACTIN_FILAMENT_DEPOLYMERIZATION	0.936816	1	0.891032	0.00996062	0.0454961	0.0320128
GOBP_NEGATIVE_REGULATION_OF_ACTIN_FILAMENT_POLYMERIZATION	0.870607	1	0.891032	0.0109236	0.0486027	0.0341988
GOBP_NEGATIVE_REGULATION_OF_ACTIVATED_T_CELL_PROLIFERATION	0.777404	1	0.891032	0.236007	0.449879	0.316552
GOBP_NEGATIVE_REGULATION_OF_ACTIVIN_RECEPTOR_SIGNALING_PATHWAY	1	1	1	0.400195	0.625843	0.440367
GOBP_NEGATIVE_REGULATION_OF_ACUTE_INFLAMMATORY_RESPONSE	0.728013	1	0.891032	0.441182	0.668447	0.470345
GOBP_NEGATIVE_REGULATION_OF_ADAPTIVE_IMMUNE_RESPONSE	0.884238	1	0.891032	0.0285343	0.0972884	0.0684559
GOBP_NEGATIVE_REGULATION_OF_ADENYLATE_CYCLASE_ACTIVATING_G_PROTEIN_COUPLED_RECEPTOR_SIGNALING_PATHWAY	1	1	1	1	1	1
GOBP_NEGATIVE_REGULATION_OF_ADENYLATE_CYCLASE_ACTIVITY	1	1	1	0.649617	0.860608	0.605558
GOBP_NEGATIVE_REGULATION_OF_ALCOHOL_BIOSYNTHETIC_PROCESS	1	1	1	0.553951	0.771882	0.543127
GOBP_NEGATIVE_REGULATION_OF_ALPHA_BETA_T_CELL_ACTIVATION	0.912551	1	0.891032	0.0047235	0.0256629	0.0180574
GOBP_NEGATIVE_REGULATION_OF_ALPHA_BETA_T_CELL_DIFFERENTIATION	0.723447	1	0.891032	0.0655895	0.183666	0.129235
GOBP_NEGATIVE_REGULATION_OF_ALPHA_BETA_T_CELL_PROLIFERATION	1	1	1	0.146065	0.318402	0.22404
GOBP_NEGATIVE_REGULATION_OF_AMINE_TRANSPORT	1	1	1	0.575742	0.793456	0.558307
GOBP_NEGATIVE_REGULATION_OF_AMINO_ACID_TRANSPORT	1	1	1	0.400195	0.625843	0.440367
GOBP_NEGATIVE_REGULATION_OF_AMYLOID_BETA_CLEARANCE	0.66767	1	0.891032	1	1	1
GOBP_NEGATIVE_REGULATION_OF_AMYLOID_FIBRIL_FORMATION	0.319186	1	0.891032	0.762886	0.928713	0.653479
GOBP_NEGATIVE_REGULATION_OF_AMYLOID_PRECURSOR_PROTEIN_BIOSYNTHETIC_PROCESS	0.580774	1	0.891032	0.909215	1	0.703639
GOBP_NEGATIVE_REGULATION_OF_AMYLOID_PRECURSOR_PROTEIN_CATABOLIC_PROCESS	0.620712	1	0.891032	0.736842	0.915446	0.644144
GOBP_NEGATIVE_REGULATION_OF_ANDROGEN_RECEPTOR_SIGNALING_PATHWAY	0.777404	1	0.891032	0.236007	0.449879	0.316552
GOBP_NEGATIVE_REGULATION_OF_ANION_TRANSMEMBRANE_TRANSPORT	0.970033	1	0.891032	0.0380793	0.121462	0.0854656
GOBP_NEGATIVE_REGULATION_OF_ANION_TRANSPORT	0.999713	1	0.891032	0.0467954	0.142439	0.100226
GOBP_NEGATIVE_REGULATION_OF_ANOIKIS	1	1	1	0.00848257	0.0402015	0.0282873
GOBP_NEGATIVE_REGULATION_OF_ANTIGEN_RECEPTOR_MEDIATED_SIGNALING_PATHWAY	0.950516	1	0.891032	0.00117978	0.00894254	0.00629232
GOBP_NEGATIVE_REGULATION_OF_APOPTOTIC_SIGNALING_PATHWAY	0.983962	1	0.891032	0.244407	0.464085	0.326548
GOBP_NEGATIVE_REGULATION_OF_ASTROCYTE_DIFFERENTIATION	1	1	1	1	1	1
GOBP_NEGATIVE_REGULATION_OF_ATP_METABOLIC_PROCESS	0.945296	1	0.891032	0.855168	0.976915	0.687396
GOBP_NEGATIVE_REGULATION_OF_ATPASE_ACTIVITY	0.242518	0.991976	0.883883	0.332696	0.56613	0.398351
GOBP_NEGATIVE_REGULATION_OF_AUTOPHAGOSOME_ASSEMBLY	0.0477187	0.312998	0.278892	0.518193	0.738578	0.519693
GOBP_NEGATIVE_REGULATION_OF_AUTOPHAGY	0.393685	1	0.891032	0.842056	0.972439	0.684246
GOBP_NEGATIVE_REGULATION_OF_AXON_EXTENSION	0.925612	1	0.891032	0.00225067	0.0144877	0.0101941
GOBP_NEGATIVE_REGULATION_OF_AXON_EXTENSION_INVOLVED_IN_AXON_GUIDANCE	0.926096	1	0.891032	0.00629868	0.0320022	0.022518
GOBP_NEGATIVE_REGULATION_OF_AXONOGENESIS	0.765937	1	0.891032	8.56e-05	0.00114178	0.0008034
GOBP_NEGATIVE_REGULATION_OF_B_CELL_ACTIVATION	0.835852	1	0.891032	1.18e-07	4.94e-06	3.47e-06
GOBP_NEGATIVE_REGULATION_OF_B_CELL_APOPTOTIC_PROCESS	0.699351	1	0.891032	0.762886	0.928713	0.653479
GOBP_NEGATIVE_REGULATION_OF_B_CELL_MEDIATED_IMMUNITY	0.699351	1	0.891032	0.400195	0.625843	0.440367
GOBP_NEGATIVE_REGULATION_OF_B_CELL_PROLIFERATION	0.81783	1	0.891032	0.00024828	0.00268097	0.00188644
GOBP_NEGATIVE_REGULATION_OF_BEHAVIOR	1	1	1	0.853273	0.976915	0.687396
GOBP_NEGATIVE_REGULATION_OF_BINDING	0.661845	1	0.891032	0.0337716	0.111708	0.078602
GOBP_NEGATIVE_REGULATION_OF_BIOMINERALIZATION	1	1	1	0.015692	0.0640733	0.0450845
GOBP_NEGATIVE_REGULATION_OF_BLOOD_CIRCULATION	1	1	1	0.791327	0.942866	0.663438
GOBP_NEGATIVE_REGULATION_OF_BLOOD_PRESSURE	0.90524	1	0.891032	0.47754	0.705096	0.496133
GOBP_NEGATIVE_REGULATION_OF_BLOOD_VESSEL_ENDOTHELIAL_CELL_MIGRATION	0.947041	1	0.891032	0.667576	0.879643	0.618952
GOBP_NEGATIVE_REGULATION_OF_BLOOD_VESSEL_ENDOTHELIAL_CELL_PROLIFERATION_INVOLVED_IN_SPROUTING_ANGIOGENESIS	0.918302	1	0.891032	0.548268	0.767641	0.540142
GOBP_NEGATIVE_REGULATION_OF_BMP_SIGNALING_PATHWAY	0.993985	1	0.891032	0.00996143	0.0454961	0.0320128
GOBP_NEGATIVE_REGULATION_OF_BONE_MINERALIZATION	1	1	1	0.0197719	0.075673	0.0532465
GOBP_NEGATIVE_REGULATION_OF_BONE_RESORPTION	0.798628	1	0.891032	0.0275341	0.0954538	0.067165
GOBP_NEGATIVE_REGULATION_OF_CALCINEURIN_MEDIATED_SIGNALING	0.777404	1	0.891032	0.0208235	0.0782815	0.0550819
GOBP_NEGATIVE_REGULATION_OF_CALCIUM_ION_IMPORT	1	1	1	0.314433	0.541187	0.3808
GOBP_NEGATIVE_REGULATION_OF_CALCIUM_ION_TRANSMEMBRANE_TRANSPORT	0.73186	1	0.891032	0.454719	0.684875	0.481905
GOBP_NEGATIVE_REGULATION_OF_CALCIUM_ION_TRANSMEMBRANE_TRANSPORTER_ACTIVITY	0.620712	1	0.891032	0.314734	0.541187	0.3808
GOBP_NEGATIVE_REGULATION_OF_CALCIUM_ION_TRANSPORT	0.933997	1	0.891032	0.0709085	0.195618	0.137645
GOBP_NEGATIVE_REGULATION_OF_CALCIUM_ION_TRANSPORT_INTO_CYTOSOL	0.81783	1	0.891032	0.587784	0.801273	0.563807
GOBP_NEGATIVE_REGULATION_OF_CALCIUM_MEDIATED_SIGNALING	0.865136	1	0.891032	0.00094221	0.00748299	0.00526532
GOBP_NEGATIVE_REGULATION_OF_CAMP_DEPENDENT_PROTEIN_KINASE_ACTIVITY	0.632654	1	0.891032	0.0194755	0.0752815	0.052971
GOBP_NEGATIVE_REGULATION_OF_CAMP_MEDIATED_SIGNALING	1	1	1	0.204863	0.407101	0.286452
GOBP_NEGATIVE_REGULATION_OF_CANONICAL_WNT_SIGNALING_PATHWAY	6.74e-07	1.83e-05	1.63e-05	0.0291993	0.09941	0.0699488
GOBP_NEGATIVE_REGULATION_OF_CARBOHYDRATE_METABOLIC_PROCESS	0.714132	1	0.891032	0.680437	0.888539	0.625211
GOBP_NEGATIVE_REGULATION_OF_CARDIAC_MUSCLE_CELL_DIFFERENTIATION	0.632654	1	0.891032	0.314433	0.541187	0.3808
GOBP_NEGATIVE_REGULATION_OF_CARDIAC_MUSCLE_CELL_PROLIFERATION	0.850918	1	0.891032	0.649617	0.860608	0.605558
GOBP_NEGATIVE_REGULATION_OF_CARDIAC_MUSCLE_TISSUE_GROWTH	0.793915	1	0.891032	0.674607	0.886399	0.623705
GOBP_NEGATIVE_REGULATION_OF_CARDIOCYTE_DIFFERENTIATION	0.753944	1	0.891032	0.480568	0.705096	0.496133
GOBP_NEGATIVE_REGULATION_OF_CARTILAGE_DEVELOPMENT	0.933147	1	0.891032	0.0080803	0.0390506	0.0274775
GOBP_NEGATIVE_REGULATION_OF_CATABOLIC_PROCESS	0.507253	1	0.891032	0.922698	1	0.703639
GOBP_NEGATIVE_REGULATION_OF_CATECHOLAMINE_SECRETION	1	1	1	0.789695	0.942866	0.663438
GOBP_NEGATIVE_REGULATION_OF_CATION_CHANNEL_ACTIVITY	0.941798	1	0.891032	0.14201	0.31825	0.223933
GOBP_NEGATIVE_REGULATION_OF_CATION_TRANSMEMBRANE_TRANSPORT	0.991596	1	0.891032	0.394126	0.625843	0.440367
GOBP_NEGATIVE_REGULATION_OF_CD4_POSITIVE_ALPHA_BETA_T_CELL_ACTIVATION	0.822813	1	0.891032	0.023026	0.0845454	0.0594894
GOBP_NEGATIVE_REGULATION_OF_CD4_POSITIVE_ALPHA_BETA_T_CELL_DIFFERENTIATION	0.633629	1	0.891032	0.0944296	0.238198	0.167605
GOBP_NEGATIVE_REGULATION_OF_CELL_ACTIVATION	0.999997	1	0.891032	1.47e-08	8.56e-07	6.02e-07
GOBP_NEGATIVE_REGULATION_OF_CELL_ADHESION	0.999988	1	0.891032	2.63e-12	4.53e-10	3.19e-10
GOBP_NEGATIVE_REGULATION_OF_CELL_ADHESION_MEDIATED_BY_INTEGRIN	0.699351	1	0.891032	0.0382082	0.121462	0.0854656
GOBP_NEGATIVE_REGULATION_OF_CELL_ADHESION_MOLECULE_PRODUCTION	1	1	1	0.480568	0.705096	0.496133
GOBP_NEGATIVE_REGULATION_OF_CELL_AGING	1	1	1	0.627433	0.839342	0.590594
GOBP_NEGATIVE_REGULATION_OF_CELL_CELL_ADHESION	0.999992	1	0.891032	6.26e-05	0.00087795	0.00061776
GOBP_NEGATIVE_REGULATION_OF_CELL_CELL_ADHESION_MEDIATED_BY_CADHERIN	1	1	1	0.314433	0.541187	0.3808
GOBP_NEGATIVE_REGULATION_OF_CELL_CYCLE_ARREST	0.377373	1	0.891032	0.750873	0.927186	0.652404
GOBP_NEGATIVE_REGULATION_OF_CELL_CYCLE_G1_S_PHASE_TRANSITION	0.0465545	0.309132	0.275447	0.65522	0.866798	0.609913
GOBP_NEGATIVE_REGULATION_OF_CELL_CYCLE_G2_M_PHASE_TRANSITION	1.5e-13	1.13e-11	1.01e-11	0.892464	0.998684	0.702714
GOBP_NEGATIVE_REGULATION_OF_CELL_CYCLE_PHASE_TRANSITION	3.03e-13	2.11e-11	1.88e-11	0.939375	1	0.703639
GOBP_NEGATIVE_REGULATION_OF_CELL_CYCLE_PROCESS	3.7e-14	3.1e-12	2.76e-12	0.989146	1	0.703639
GOBP_NEGATIVE_REGULATION_OF_CELL_DEVELOPMENT	0.972523	1	0.891032	0.00043044	0.00409665	0.00288256
GOBP_NEGATIVE_REGULATION_OF_CELL_DIVISION	0.81783	1	0.891032	0.300204	0.535512	0.376807
GOBP_NEGATIVE_REGULATION_OF_CELL_FATE_COMMITMENT	1	1	1	0.00732624	0.0360426	0.025361
GOBP_NEGATIVE_REGULATION_OF_CELL_GROWTH	0.851517	1	0.891032	3.77e-05	0.00057954	0.00040779
GOBP_NEGATIVE_REGULATION_OF_CELL_GROWTH_INVOLVED_IN_CARDIAC_MUSCLE_CELL_DEVELOPMENT	0.699351	1	0.891032	0.762886	0.928713	0.653479
GOBP_NEGATIVE_REGULATION_OF_CELL_JUNCTION_ASSEMBLY	1	1	1	0.00050138	0.00469501	0.00330359
GOBP_NEGATIVE_REGULATION_OF_CELL_KILLING	1	1	1	0.00629868	0.0320022	0.022518
GOBP_NEGATIVE_REGULATION_OF_CELL_MATRIX_ADHESION	1	1	1	0.00143495	0.0104348	0.00734233
GOBP_NEGATIVE_REGULATION_OF_CELL_MIGRATION_INVOLVED_IN_SPROUTING_ANGIOGENESIS	0.91933	1	0.891032	0.713907	0.908371	0.639166
GOBP_NEGATIVE_REGULATION_OF_CELL_MORPHOGENESIS_INVOLVED_IN_DIFFERENTIATION	1	1	1	0.0152767	0.0628626	0.0442326
GOBP_NEGATIVE_REGULATION_OF_CELL_PROJECTION_ORGANIZATION	0.73679	1	0.891032	2.86e-06	7.28e-05	5.12e-05
GOBP_NEGATIVE_REGULATION_OF_CELL_SIZE	0.632654	1	0.891032	1	1	1
GOBP_NEGATIVE_REGULATION_OF_CELL_SUBSTRATE_ADHESION	0.998795	1	0.891032	2.26e-06	5.94e-05	4.18e-05
GOBP_NEGATIVE_REGULATION_OF_CELL_SUBSTRATE_JUNCTION_ORGANIZATION	1	1	1	0.0115274	0.0504216	0.0354786
GOBP_NEGATIVE_REGULATION_OF_CELLULAR_AMIDE_METABOLIC_PROCESS	0.646793	1	0.891032	0.999886	1	0.703639
GOBP_NEGATIVE_REGULATION_OF_CELLULAR_CATABOLIC_PROCESS	0.310075	1	0.891032	0.956161	1	0.703639
GOBP_NEGATIVE_REGULATION_OF_CELLULAR_PROTEIN_CATABOLIC_PROCESS	0.310645	1	0.891032	0.880322	0.993928	0.699367
GOBP_NEGATIVE_REGULATION_OF_CELLULAR_PROTEIN_LOCALIZATION	0.504552	1	0.891032	0.0253868	0.0912358	0.0641971
GOBP_NEGATIVE_REGULATION_OF_CELLULAR_RESPONSE_TO_GROWTH_FACTOR_STIMULUS	0.998727	1	0.891032	9.06e-06	0.00017204	0.00012106
GOBP_NEGATIVE_REGULATION_OF_CELLULAR_RESPONSE_TO_INSULIN_STIMULUS	0.979939	1	0.891032	0.00971372	0.0449828	0.0316516
GOBP_NEGATIVE_REGULATION_OF_CELLULAR_RESPONSE_TO_VASCULAR_ENDOTHELIAL_GROWTH_FACTOR_STIMULUS	0.835202	1	0.891032	0.332696	0.56613	0.398351
GOBP_NEGATIVE_REGULATION_OF_CELLULAR_SENESCENCE	1	1	1	0.460015	0.688396	0.484382
GOBP_NEGATIVE_REGULATION_OF_CENTROSOME_DUPLICATION	0.0217633	0.171062	0.152422	1	1	1
GOBP_NEGATIVE_REGULATION_OF_CHEMOKINE_PRODUCTION	0.918302	1	0.891032	0.144476	0.318402	0.22404
GOBP_NEGATIVE_REGULATION_OF_CHEMOTAXIS	0.987346	1	0.891032	0.00018076	0.00207868	0.00146264
[truncated: 3,162 more rows]

## Sheet: S3C.COAD.GOBP
Table S3C. GO (Gene Ontology) enrichment for COAD analysis in Group1 and Group2.
ID	Enrichment_p-value	Enrichment_p-adjust	Enrichment_FDR	Enrichment_p-value	Enrichment_p-adjust	Enrichment_FDR
GOBP_2_OXOGLUTARATE_METABOLIC_PROCESS	1	1	1	0.575683	0.76527	0.597739
GOBP_3_PHOSPHOADENOSINE_5_PHOSPHOSULFATE_METABOLIC_PROCESS	1	1	1	0.00149069	0.0203401	0.0158873
GOBP_3_UTR_MEDIATED_MRNA_DESTABILIZATION	1	1	1	1	1	1
GOBP_3_UTR_MEDIATED_MRNA_STABILIZATION	0.650137	1	0.929747	1	1	1
GOBP_ACETYL_COA_BIOSYNTHETIC_PROCESS	1	1	1	0.6924	0.831751	0.649665
GOBP_ACETYL_COA_BIOSYNTHETIC_PROCESS_FROM_PYRUVATE	1	1	1	0.552318	0.747036	0.583496
GOBP_ACETYL_COA_METABOLIC_PROCESS	1	1	1	0.0460464	0.185867	0.145177
GOBP_ACID_SECRETION	1	1	1	0.882892	0.945924	0.738844
GOBP_ACIDIC_AMINO_ACID_TRANSPORT	0.322183	0.997008	0.926964	0.46508	0.709902	0.554491
GOBP_ACROSOME_ASSEMBLY	1	1	1	1	1	1
GOBP_ACROSOME_REACTION	0.810526	1	0.929747	0.596452	0.775573	0.605786
GOBP_ACTIN_CROSSLINK_FORMATION	1	1	1	0.00359712	0.0356488	0.0278446
GOBP_ACTIN_CYTOSKELETON_REORGANIZATION	0.152283	0.721848	0.671135	0.0026789	0.0295453	0.0230773
GOBP_ACTIN_FILAMENT_BASED_MOVEMENT	1	1	1	0.0051749	0.045114	0.0352377
GOBP_ACTIN_FILAMENT_BASED_TRANSPORT	1	1	1	0.300052	0.575979	0.449887
GOBP_ACTIN_FILAMENT_BUNDLE_ORGANIZATION	0.51033	1	0.929747	4.02131e-08	5.82674e-06	4.55116e-06
GOBP_ACTIN_FILAMENT_DEPOLYMERIZATION	0.924555	1	0.929747	4.35246e-05	0.00143335	0.00111957
GOBP_ACTIN_FILAMENT_NETWORK_FORMATION	1	1	1	0.126883	0.353327	0.275977
GOBP_ACTIN_FILAMENT_ORGANIZATION	0.311848	0.997008	0.926964	3.42903e-15	7.20439e-12	5.62722e-12
GOBP_ACTIN_FILAMENT_REORGANIZATION	1	1	1	0.414743	0.689139	0.538274
GOBP_ACTIN_FILAMENT_SEVERING	1	1	1	0.000100885	0.00264948	0.00206946
GOBP_ACTIN_MEDIATED_CELL_CONTRACTION	1	1	1	0.048794	0.191329	0.149443
GOBP_ACTIN_NUCLEATION	0.385338	0.997008	0.926964	0.0524511	0.201094	0.157071
GOBP_ACTIN_POLYMERIZATION_OR_DEPOLYMERIZATION	0.315111	0.997008	0.926964	4.87797e-10	2.04972e-07	1.601e-07
GOBP_ACTION_POTENTIAL	1	1	1	0.0948384	0.294757	0.230229
GOBP_ACTIVATED_T_CELL_PROLIFERATION	0.591486	1	0.929747	0.0312803	0.148018	0.115614
GOBP_ACTIVATION_OF_ADENYLATE_CYCLASE_ACTIVITY	0.81865	1	0.929747	0.876434	0.942369	0.736067
GOBP_ACTIVATION_OF_CYSTEINE_TYPE_ENDOPEPTIDASE_ACTIVITY	0.0241603	0.270901	0.251869	1	1	1
GOBP_ACTIVATION_OF_CYSTEINE_TYPE_ENDOPEPTIDASE_ACTIVITY_INVOLVED_IN_APOPTOTIC_PROCESS	0.725353	1	0.929747	0.0835917	0.275004	0.214801
GOBP_ACTIVATION_OF_GTPASE_ACTIVITY	0.00377552	0.0860972	0.0800486	0.722558	0.853471	0.66663
GOBP_ACTIVATION_OF_INNATE_IMMUNE_RESPONSE	0.174148	0.783826	0.72876	0.779212	0.887515	0.693222
GOBP_ACTIVATION_OF_JANUS_KINASE_ACTIVITY	1	1	1	0.552318	0.747036	0.583496
GOBP_ACTIVATION_OF_JNKK_ACTIVITY	1	1	1	0.414743	0.689139	0.538274
GOBP_ACTIVATION_OF_JUN_KINASE_ACTIVITY	0.81865	1	0.929747	0.876434	0.942369	0.736067
GOBP_ACTIVATION_OF_MAPK_ACTIVITY	0.900218	1	0.929747	0.283332	0.556076	0.434341
GOBP_ACTIVATION_OF_MAPKK_ACTIVITY	0.0660554	0.494829	0.460066	0.274796	0.545695	0.426232
GOBP_ACTIVATION_OF_MAPKKK_ACTIVITY	0.408402	0.997008	0.926964	1	1	1
GOBP_ACTIVATION_OF_NF_KAPPAB_INDUCING_KINASE_ACTIVITY	0.545031	1	0.929747	0.618822	0.790122	0.61715
GOBP_ACTIVATION_OF_PHOSPHOLIPASE_C_ACTIVITY	1	1	1	0.502792	0.725028	0.566306
GOBP_ACTIVATION_OF_PROTEIN_KINASE_A_ACTIVITY	0.178596	0.783826	0.72876	0.618822	0.790122	0.61715
GOBP_ACTIVATION_OF_PROTEIN_KINASE_ACTIVITY	0.433265	0.997008	0.926964	0.266468	0.535228	0.418057
GOBP_ACTIVATION_OF_PROTEIN_KINASE_B_ACTIVITY	0.445153	0.997008	0.926964	0.846846	0.927161	0.724189
GOBP_ACTIVATION_OF_TRANSMEMBRANE_RECEPTOR_PROTEIN_TYROSINE_KINASE_ACTIVITY	1	1	1	0.501661	0.725028	0.566306
GOBP_ACTIVIN_RECEPTOR_SIGNALING_PATHWAY	0.860589	1	0.929747	0.688212	0.831751	0.649665
GOBP_ACTOMYOSIN_STRUCTURE_ORGANIZATION	0.425994	0.997008	0.926964	6.41416e-06	0.00029947	0.000233911
GOBP_ACUTE_INFLAMMATORY_RESPONSE	0.946778	1	0.929747	0.0098283	0.0724503	0.0565896
GOBP_ACUTE_INFLAMMATORY_RESPONSE_TO_ANTIGENIC_STIMULUS	1	1	1	0.339073	0.624084	0.48746
GOBP_ACUTE_PHASE_RESPONSE	0.86657	1	0.929747	0.0900254	0.289676	0.226261
GOBP_ACYLGLYCEROL_HOMEOSTASIS	1	1	1	0.15379	0.395486	0.308907
GOBP_ADAPTATION_OF_SIGNALING_PATHWAY	1	1	1	1	1	1
GOBP_ADAPTIVE_IMMUNE_RESPONSE_BASED_ON_SOMATIC_RECOMBINATION_OF_IMMUNE_RECEPTORS_BUILT_FROM_IMMUNOGLOBULIN_SUPERFAMILY_DOMAINS	0.987224	1	0.929747	0.0352539	0.158435	0.123751
GOBP_ADAPTIVE_THERMOGENESIS	0.332246	0.997008	0.926964	0.0139444	0.0882443	0.068926
GOBP_ADENYLATE_CYCLASE_ACTIVATING_ADRENERGIC_RECEPTOR_SIGNALING_PATHWAY	1	1	1	0.751787	0.869772	0.679363
GOBP_ADENYLATE_CYCLASE_ACTIVATING_DOPAMINE_RECEPTOR_SIGNALING_PATHWAY	0.354297	0.997008	0.926964	1	1	1
GOBP_ADENYLATE_CYCLASE_ACTIVATING_G_PROTEIN_COUPLED_RECEPTOR_SIGNALING_PATHWAY	0.998124	1	0.929747	0.981635	1	0.781082
GOBP_ADENYLATE_CYCLASE_INHIBITING_G_PROTEIN_COUPLED_RECEPTOR_SIGNALING_PATHWAY	0.975911	1	0.929747	0.653403	0.814368	0.636088
GOBP_ADENYLATE_CYCLASE_MODULATING_G_PROTEIN_COUPLED_RECEPTOR_SIGNALING_PATHWAY	0.999542	1	0.929747	0.982401	1	0.781082
GOBP_ADHERENS_JUNCTION_ASSEMBLY	1	1	1	1	1	1
GOBP_ADHERENS_JUNCTION_ORGANIZATION	0.94451	1	0.929747	0.128953	0.357901	0.27955
GOBP_ADHESION_OF_SYMBIONT_TO_HOST	1	1	1	0.00631795	0.0519531	0.0405796
GOBP_ADHESION_OF_SYMBIONT_TO_HOST_CELL	1	1	1	0.0218311	0.114668	0.0895649
GOBP_ADIPOSE_TISSUE_DEVELOPMENT	1	1	1	0.869621	0.940292	0.734445
GOBP_ADRENAL_GLAND_DEVELOPMENT	0.601026	1	0.929747	0.300052	0.575979	0.449887
GOBP_ADRENERGIC_RECEPTOR_SIGNALING_PATHWAY	1	1	1	0.810181	0.90542	0.707207
GOBP_ADULT_BEHAVIOR	0.963056	1	0.929747	0.736425	0.863459	0.674432
GOBP_ADULT_HEART_DEVELOPMENT	0.433732	0.997008	0.926964	1	1	1
GOBP_ADULT_LOCOMOTORY_BEHAVIOR	0.933861	1	0.929747	0.634217	0.800837	0.625519
GOBP_AEROBIC_RESPIRATION	0.0306914	0.31677	0.294515	1	1	1
GOBP_AGING	0.6538	1	0.929747	0.00061979	0.0106736	0.00833695
GOBP_ALANINE_TRANSPORT	1	1	1	0.552318	0.747036	0.583496
GOBP_ALCOHOL_BIOSYNTHETIC_PROCESS	0.905567	1	0.929747	0.00130819	0.0186973	0.0146041
GOBP_ALCOHOL_CATABOLIC_PROCESS	0.420199	0.997008	0.926964	0.00200548	0.0247854	0.0193594
GOBP_ALCOHOL_METABOLIC_PROCESS	0.878975	1	0.929747	2.77711e-11	1.94491e-08	1.51913e-08
GOBP_ALDEHYDE_BIOSYNTHETIC_PROCESS	0.0241603	0.270901	0.251869	1	1	1
GOBP_ALDEHYDE_CATABOLIC_PROCESS	1	1	1	1	1	1
GOBP_ALDITOL_METABOLIC_PROCESS	0.634477	1	0.929747	0.115488	0.335686	0.262198
GOBP_ALDITOL_PHOSPHATE_METABOLIC_PROCESS	1	1	1	0.0170225	0.0990699	0.0773817
GOBP_ALPHA_AMINO_ACID_BIOSYNTHETIC_PROCESS	0.787228	1	0.929747	0.0593261	0.218674	0.170802
GOBP_ALPHA_AMINO_ACID_CATABOLIC_PROCESS	0.978886	1	0.929747	0.00199845	0.0247854	0.0193594
GOBP_ALPHA_AMINO_ACID_METABOLIC_PROCESS	0.91568	1	0.929747	0.00528409	0.0459705	0.0359067
GOBP_ALPHA_BETA_T_CELL_ACTIVATION	0.956664	1	0.929747	0.250592	0.521539	0.407364
GOBP_ALPHA_BETA_T_CELL_DIFFERENTIATION	0.841875	1	0.929747	0.487621	0.722348	0.564213
GOBP_ALPHA_BETA_T_CELL_PROLIFERATION	0.802038	1	0.929747	0.00267198	0.0295453	0.0230773
GOBP_ALPHA_LINOLENIC_ACID_METABOLIC_PROCESS	1	1	1	0.501661	0.725028	0.566306
GOBP_ALTERNATIVE_MRNA_SPLICING_VIA_SPLICEOSOME	5.7559e-05	0.00255608	0.0023765	0.899905	0.953886	0.745063
GOBP_AMEBOIDAL_TYPE_CELL_MIGRATION	0.911825	1	0.929747	3.03794e-07	2.93377e-05	2.29151e-05
GOBP_AMELOGENESIS	1	1	1	1	1	1
GOBP_AMINE_BIOSYNTHETIC_PROCESS	1	1	1	0.610712	0.788149	0.615609
GOBP_AMINE_CATABOLIC_PROCESS	1	1	1	0.0238111	0.122615	0.0957726
GOBP_AMINE_METABOLIC_PROCESS	0.831861	1	0.929747	0.00214685	0.026224	0.0204831
GOBP_AMINE_TRANSPORT	0.772254	1	0.929747	0.218876	0.477432	0.372914
GOBP_AMINO_ACID_ACTIVATION	0.626065	1	0.929747	0.927769	0.969049	0.756907
GOBP_AMINO_ACID_BETAINE_METABOLIC_PROCESS	1	1	1	1	1	1
GOBP_AMINO_ACID_IMPORT	0.877772	1	0.929747	0.23998	0.507533	0.396425
GOBP_AMINO_ACID_TRANSMEMBRANE_TRANSPORT	0.592435	1	0.929747	0.565787	0.761609	0.594879
GOBP_AMINO_ACID_TRANSPORT	0.637214	1	0.929747	0.685006	0.831751	0.649665
GOBP_AMINO_SUGAR_BIOSYNTHETIC_PROCESS	0.433732	0.997008	0.926964	0.00359712	0.0356488	0.0278446
GOBP_AMINO_SUGAR_CATABOLIC_PROCESS	0.433732	0.997008	0.926964	0.0273013	0.134648	0.105171
GOBP_AMINO_SUGAR_METABOLIC_PROCESS	0.83387	1	0.929747	0.0186707	0.105026	0.0820335
GOBP_AMINOACYL_TRNA_METABOLISM_INVOLVED_IN_TRANSLATIONAL_FIDELITY	1	1	1	0.501661	0.725028	0.566306
GOBP_AMINOGLYCAN_BIOSYNTHETIC_PROCESS	1	1	1	2.42048e-05	0.000900074	0.000703031
GOBP_AMINOGLYCAN_CATABOLIC_PROCESS	1	1	1	8.80776e-06	0.000385523	0.000301125
GOBP_AMINOGLYCAN_METABOLIC_PROCESS	0.999478	1	0.929747	9.08851e-05	0.00244189	0.00190732
GOBP_AMINOGLYCOSIDE_ANTIBIOTIC_METABOLIC_PROCESS	1	1	1	0.0925834	0.289676	0.226261
GOBP_AMMONIUM_ION_METABOLIC_PROCESS	1	1	1	1	1	1
GOBP_AMMONIUM_TRANSPORT	1	1	1	0.414743	0.689139	0.538274
GOBP_AMP_METABOLIC_PROCESS	0.503407	1	0.929747	0.0476216	0.188069	0.146898
GOBP_AMYLOID_BETA_CLEARANCE	0.221048	0.859491	0.799109	1.76103e-05	0.000678884	0.000530264
GOBP_AMYLOID_BETA_METABOLIC_PROCESS	0.787228	1	0.929747	0.0593261	0.218674	0.170802
GOBP_AMYLOID_FIBRIL_FORMATION	0.290379	0.961274	0.893741	0.00149069	0.0203401	0.0158873
GOBP_AMYLOID_PRECURSOR_PROTEIN_BIOSYNTHETIC_PROCESS	0.706357	1	0.929747	0.433021	0.703978	0.549865
GOBP_AMYLOID_PRECURSOR_PROTEIN_CATABOLIC_PROCESS	0.787228	1	0.929747	0.27056	0.542411	0.423667
GOBP_AMYLOID_PRECURSOR_PROTEIN_METABOLIC_PROCESS	0.772254	1	0.929747	0.117081	0.338359	0.264286
GOBP_ANAPHASE_PROMOTING_COMPLEX_DEPENDENT_CATABOLIC_PROCESS	0.00892902	0.148481	0.138049	0.935103	0.97367	0.760515
GOBP_ANATOMICAL_STRUCTURE_ARRANGEMENT	1	1	1	0.552318	0.747036	0.583496
GOBP_ANATOMICAL_STRUCTURE_HOMEOSTASIS	0.619213	1	0.929747	0.0983326	0.301821	0.235747
GOBP_ANATOMICAL_STRUCTURE_MATURATION	0.984739	1	0.929747	0.582259	0.770356	0.601711
GOBP_ANATOMICAL_STRUCTURE_REGRESSION	1	1	1	0.59783	0.775573	0.605786
GOBP_ANDROGEN_BIOSYNTHETIC_PROCESS	1	1	1	0.44528	0.703978	0.549865
GOBP_ANDROGEN_METABOLIC_PROCESS	1	1	1	0.204282	0.460024	0.359316
GOBP_ANDROGEN_RECEPTOR_SIGNALING_PATHWAY	1	1	1	0.882892	0.945924	0.738844
GOBP_ANGIOGENESIS_INVOLVED_IN_WOUND_HEALING	0.718941	1	0.929747	0.45097	0.705501	0.551054
GOBP_ANGIOTENSIN_ACTIVATED_SIGNALING_PATHWAY	0.457979	0.997008	0.926964	0.163583	0.404082	0.315621
GOBP_ANIMAL_ORGAN_FORMATION	0.930894	1	0.929747	0.394345	0.689139	0.538274
GOBP_ANIMAL_ORGAN_MATURATION	1	1	1	0.751787	0.869772	0.679363
GOBP_ANIMAL_ORGAN_REGENERATION	0.609667	1	0.929747	0.180246	0.430247	0.336058
GOBP_ANION_HOMEOSTASIS	0.774228	1	0.929747	0.535536	0.744401	0.581438
GOBP_ANOIKIS	1	1	1	0.0989525	0.302399	0.236198
GOBP_ANTERIOR_POSTERIOR_AXIS_SPECIFICATION	0.626065	1	0.929747	0.927769	0.969049	0.756907
GOBP_ANTERIOR_POSTERIOR_PATTERN_SPECIFICATION	0.870858	1	0.929747	0.982758	1	0.781082
GOBP_ANTEROGRADE_AXONAL_TRANSPORT	0.140631	0.688786	0.640396	0.919579	0.964571	0.753409
GOBP_ANTIBACTERIAL_HUMORAL_RESPONSE	0.930894	1	0.929747	0.962091	0.990617	0.773753
GOBP_ANTIGEN_PROCESSING_AND_PRESENTATION	0.675006	1	0.929747	0.00123354	0.0178121	0.0139127
GOBP_ANTIGEN_PROCESSING_AND_PRESENTATION_OF_ENDOGENOUS_ANTIGEN	1	1	1	0.396213	0.689139	0.538274
GOBP_ANTIGEN_PROCESSING_AND_PRESENTATION_OF_ENDOGENOUS_PEPTIDE_ANTIGEN	1	1	1	0.63872	0.800837	0.625519
GOBP_ANTIGEN_PROCESSING_AND_PRESENTATION_OF_EXOGENOUS_PEPTIDE_ANTIGEN_VIA_MHC_CLASS_I	0.448867	0.997008	0.926964	0.23825	0.507533	0.396425
GOBP_ANTIGEN_PROCESSING_AND_PRESENTATION_OF_PEPTIDE_ANTIGEN	0.45047	0.997008	0.926964	0.0828835	0.274753	0.214605
GOBP_ANTIGEN_PROCESSING_AND_PRESENTATION_OF_PEPTIDE_ANTIGEN_VIA_MHC_CLASS_I	0.616807	1	0.929747	0.0335589	0.153688	0.120043
GOBP_ANTIGEN_PROCESSING_AND_PRESENTATION_OF_PEPTIDE_OR_POLYSACCHARIDE_ANTIGEN_VIA_MHC_CLASS_II	0.460469	0.997486	0.927409	0.175397	0.424795	0.3318
GOBP_ANTIGEN_PROCESSING_AND_PRESENTATION_VIA_MHC_CLASS_IB	1	1	1	1	1	1
GOBP_ANTIGEN_RECEPTOR_MEDIATED_SIGNALING_PATHWAY	0.597764	1	0.929747	0.0672971	0.238796	0.186519
GOBP_ANTIMICROBIAL_HUMORAL_IMMUNE_RESPONSE_MEDIATED_BY_ANTIMICROBIAL_PEPTIDE	0.852491	1	0.929747	0.221105	0.477432	0.372914
GOBP_ANTIMICROBIAL_HUMORAL_RESPONSE	0.94569	1	0.929747	0.207208	0.464615	0.362902
GOBP_ANTIVIRAL_INNATE_IMMUNE_RESPONSE	1	1	1	0.414743	0.689139	0.538274
GOBP_AORTA_DEVELOPMENT	0.0853898	0.565079	0.525381	0.157841	0.402702	0.314543
GOBP_AORTA_MORPHOGENESIS	0.41551	0.997008	0.926964	0.0908667	0.289676	0.226261
GOBP_AORTIC_VALVE_MORPHOGENESIS	1	1	1	0.810181	0.90542	0.707207
GOBP_APICAL_JUNCTION_ASSEMBLY	0.514179	1	0.929747	0.300957	0.576926	0.450626
GOBP_APICAL_PROTEIN_LOCALIZATION	1	1	1	0.552318	0.747036	0.583496
GOBP_APOPTOTIC_CELL_CLEARANCE	0.647829	1	0.929747	0.00459518	0.0425308	0.03322
GOBP_APOPTOTIC_DNA_FRAGMENTATION	0.650137	1	0.929747	0.358339	0.65071	0.508257
GOBP_APOPTOTIC_MITOCHONDRIAL_CHANGES	0.748858	1	0.929747	0.419011	0.693183	0.541433
GOBP_APOPTOTIC_PROCESS_INVOLVED_IN_DEVELOPMENT	1	1	1	0.289145	0.564848	0.441192
GOBP_APOPTOTIC_PROCESS_INVOLVED_IN_MORPHOGENESIS	1	1	1	0.115488	0.335686	0.262198
GOBP_APPENDAGE_DEVELOPMENT	0.999349	1	0.929747	0.873379	0.942369	0.736067
GOBP_APPENDAGE_MORPHOGENESIS	0.997211	1	0.929747	0.923843	0.967112	0.755394
GOBP_ARACHIDONIC_ACID_METABOLIC_PROCESS	0.724909	1	0.929747	4.35246e-05	0.00143335	0.00111957
GOBP_ARACHIDONIC_ACID_SECRETION	1	1	1	0.788681	0.891504	0.696337
GOBP_ARF_PROTEIN_SIGNAL_TRANSDUCTION	1	1	1	1	1	1
GOBP_ARGININE_CATABOLIC_PROCESS	1	1	1	0.109375	0.322073	0.251565
GOBP_ARGININE_METABOLIC_PROCESS	1	1	1	0.0832367	0.274753	0.214605
GOBP_ARGININE_TRANSPORT	1	1	1	1	1	1
GOBP_AROMATIC_AMINO_ACID_FAMILY_CATABOLIC_PROCESS	0.583171	1	0.929747	0.00306872	0.0322369	0.0251796
GOBP_AROMATIC_AMINO_ACID_FAMILY_METABOLIC_PROCESS	0.753552	1	0.929747	0.0238111	0.122615	0.0957726
GOBP_AROMATIC_AMINO_ACID_TRANSPORT	0.433732	0.997008	0.926964	0.0273013	0.134648	0.105171
GOBP_ARP2_3_COMPLEX_MEDIATED_ACTIN_NUCLEATION	0.232465	0.875634	0.814118	0.610712	0.788149	0.615609
GOBP_ARTERY_DEVELOPMENT	0.112394	0.63393	0.589394	0.0104521	0.0739858	0.0577889
GOBP_ARTERY_MORPHOGENESIS	0.351601	0.997008	0.926964	0.00326986	0.033594	0.0262397
GOBP_ASPARTATE_FAMILY_AMINO_ACID_BIOSYNTHETIC_PROCESS	0.226068	0.861152	0.800653	0.300052	0.575979	0.449887
GOBP_ASPARTATE_FAMILY_AMINO_ACID_CATABOLIC_PROCESS	1	1	1	0.0294642	0.142801	0.111539
GOBP_ASPARTATE_FAMILY_AMINO_ACID_METABOLIC_PROCESS	0.637075	1	0.929747	0.0446272	0.182239	0.142343
GOBP_ASSOCIATIVE_LEARNING	0.00830281	0.142243	0.13225	0.876246	0.942369	0.736067
GOBP_ASTRAL_MICROTUBULE_ORGANIZATION	0.354297	0.997008	0.926964	1	1	1
GOBP_ASTROCYTE_ACTIVATION	0.665127	1	0.929747	0.377396	0.671104	0.524187
GOBP_ASTROCYTE_DEVELOPMENT	0.103731	0.615156	0.571939	0.174165	0.423275	0.330612
GOBP_ASTROCYTE_DIFFERENTIATION	0.194611	0.803931	0.747452	0.172464	0.420355	0.328332
GOBP_ASYMMETRIC_CELL_DIVISION	0.0338988	0.329671	0.30651	1	1	1
GOBP_ATF6_MEDIATED_UNFOLDED_PROTEIN_RESPONSE	1	1	1	0.414743	0.689139	0.538274
GOBP_ATP_BIOSYNTHETIC_PROCESS	0.697829	1	0.929747	0.564708	0.761609	0.594879
GOBP_ATP_DEPENDENT_CHROMATIN_REMODELING	0.181266	0.791152	0.735571	0.950209	0.984375	0.768877
GOBP_ATP_METABOLIC_PROCESS	0.00212125	0.0559313	0.052002	0.467058	0.709902	0.554491
GOBP_ATP_SYNTHESIS_COUPLED_ELECTRON_TRANSPORT	0.00363196	0.0848202	0.0788613	0.99535	1	0.781082
GOBP_ATP_SYNTHESIS_COUPLED_PROTON_TRANSPORT	0.69321	1	0.929747	1	1	1
GOBP_ATP_TRANSPORT	1	1	1	0.59783	0.775573	0.605786
GOBP_ATRIAL_CARDIAC_MUSCLE_CELL_MEMBRANE_REPOLARIZATION	1	1	1	1	1	1
GOBP_ATRIAL_CARDIAC_MUSCLE_CELL_TO_AV_NODE_CELL_SIGNALING	1	1	1	0.63872	0.800837	0.625519
GOBP_ATRIAL_SEPTUM_DEVELOPMENT	1	1	1	0.31963	0.599592	0.468331
GOBP_ATRIOVENTRICULAR_VALVE_DEVELOPMENT	1	1	1	1	1	1
GOBP_ATTACHMENT_OF_MITOTIC_SPINDLE_MICROTUBULES_TO_KINETOCHORE	0.0031106	0.077765	0.0723018	0.552318	0.747036	0.583496
GOBP_ATTACHMENT_OF_SPINDLE_MICROTUBULES_TO_KINETOCHORE	0.000601754	0.0193421	0.0179832	0.846846	0.927161	0.724189
GOBP_AUDITORY_RECEPTOR_CELL_DEVELOPMENT	1	1	1	0.63872	0.800837	0.625519
GOBP_AUDITORY_RECEPTOR_CELL_MORPHOGENESIS	1	1	1	0.575683	0.76527	0.597739
GOBP_AUTONOMIC_NERVOUS_SYSTEM_DEVELOPMENT	0.86657	1	0.929747	0.217378	0.477432	0.372914
GOBP_AUTOPHAGIC_CELL_DEATH	1	1	1	1	1	1
GOBP_AUTOPHAGOSOME_MATURATION	0.0969542	0.594946	0.553149	0.889013	0.949576	0.741696
GOBP_AUTOPHAGOSOME_ORGANIZATION	0.00335881	0.0821448	0.0763739	0.593391	0.775573	0.605786
GOBP_AUTOPHAGY_OF_MITOCHONDRION	0.0146238	0.204317	0.189963	0.756986	0.874583	0.68312
GOBP_AUTOPHAGY_OF_NUCLEUS	0.0199504	0.245739	0.228475	1	1	1
GOBP_AV_NODE_CELL_TO_BUNDLE_OF_HIS_CELL_COMMUNICATION	1	1	1	1	1	1
GOBP_AXIS_ELONGATION	1	1	1	0.164345	0.404082	0.315621
GOBP_AXIS_SPECIFICATION	0.687446	1	0.929747	0.932196	0.9715	0.758821
GOBP_AXO_DENDRITIC_PROTEIN_TRANSPORT	1	1	1	0.501661	0.725028	0.566306
GOBP_AXO_DENDRITIC_TRANSPORT	0.0744231	0.535543	0.497919	0.975341	0.999362	0.780583
GOBP_AXON_ENSHEATHMENT_IN_CENTRAL_NERVOUS_SYSTEM	0.601026	1	0.929747	0.0935068	0.291049	0.227333
GOBP_AXON_EXTENSION	0.362015	0.997008	0.926964	0.0157664	0.0958763	0.0748873
GOBP_AXONAL_FASCICULATION	1	1	1	0.63872	0.800837	0.625519
GOBP_AXONAL_TRANSPORT_OF_MITOCHONDRION	0.457979	0.997008	0.926964	1	1	1
GOBP_AXONEMAL_DYNEIN_COMPLEX_ASSEMBLY	1	1	1	1	1	1
GOBP_AXONEME_ASSEMBLY	1	1	1	1	1	1
GOBP_AZOLE_TRANSMEMBRANE_TRANSPORT	0.408402	0.997008	0.926964	1	1	1
GOBP_B_CELL_ACTIVATION	0.611448	1	0.929747	0.00928309	0.0691623	0.0540214
GOBP_B_CELL_ACTIVATION_INVOLVED_IN_IMMUNE_RESPONSE	0.439295	0.997008	0.926964	0.117432	0.338908	0.264715
GOBP_B_CELL_APOPTOTIC_PROCESS	0.665127	1	0.929747	0.139184	0.377324	0.294721
GOBP_B_CELL_DIFFERENTIATION	0.370904	0.997008	0.926964	0.0122736	0.0822549	0.0642478
GOBP_B_CELL_HOMEOSTASIS	0.116067	0.63393	0.589394	0.177395	0.427416	0.333847
GOBP_B_CELL_MEDIATED_IMMUNITY	0.960315	1	0.929747	0.594575	0.775573	0.605786
GOBP_B_CELL_PROLIFERATION	0.921051	1	0.929747	0.0112663	0.0778633	0.0608176
GOBP_B_CELL_RECEPTOR_SIGNALING_PATHWAY	0.7979	1	0.929747	0.0678566	0.240011	0.187468
GOBP_BARBED_END_ACTIN_FILAMENT_CAPPING	1	1	1	0.010051	0.0724503	0.0565896
GOBP_BASE_CONVERSION_OR_SUBSTITUTION_EDITING	1	1	1	0.657579	0.814368	0.636088
GOBP_BASE_EXCISION_REPAIR	0.232465	0.875634	0.814118	1	1	1
GOBP_BASE_EXCISION_REPAIR_AP_SITE_FORMATION	0.354297	0.997008	0.926964	1	1	1
GOBP_BASEMENT_MEMBRANE_ASSEMBLY	1	1	1	0.00631795	0.0519531	0.0405796
GOBP_BASEMENT_MEMBRANE_ORGANIZATION	1	1	1	0.000725963	0.0117327	0.00916419
GOBP_BASIC_AMINO_ACID_TRANSMEMBRANE_TRANSPORT	0.457979	0.997008	0.926964	1	1	1
GOBP_BASIC_AMINO_ACID_TRANSPORT	0.545031	1	0.929747	1	1	1
GOBP_BEHAVIORAL_RESPONSE_TO_COCAINE	1	1	1	0.109375	0.322073	0.251565
GOBP_BEHAVIORAL_RESPONSE_TO_PAIN	1	1	1	0.0218311	0.114668	0.0895649
GOBP_BENZENE_CONTAINING_COMPOUND_METABOLIC_PROCESS	1	1	1	0.0387924	0.168743	0.131802
GOBP_BETA_CATENIN_DESTRUCTION_COMPLEX_DISASSEMBLY	0.226068	0.861152	0.800653	0.675456	0.823401	0.643143
GOBP_BETA_CATENIN_TCF_COMPLEX_ASSEMBLY	0.145344	0.703782	0.654339	0.485868	0.721675	0.563687
GOBP_BICARBONATE_TRANSPORT	1	1	1	5.63349e-05	0.00171421	0.00133894
GOBP_BILE_ACID_AND_BILE_SALT_TRANSPORT	1	1	1	0.829495	0.914839	0.714564
GOBP_BILE_ACID_BIOSYNTHETIC_PROCESS	1	1	1	0.13439	0.370298	0.289233
GOBP_BILE_ACID_METABOLIC_PROCESS	0.888035	1	0.929747	0.263088	0.530467	0.414338
GOBP_BILE_ACID_SECRETION	1	1	1	0.474225	0.709902	0.554491
GOBP_BILE_ACID_SIGNALING_PATHWAY	1	1	1	0.501661	0.725028	0.566306
GOBP_BINDING_OF_SPERM_TO_ZONA_PELLUCIDA	1	1	1	0.905523	0.956994	0.74749
GOBP_BIOLOGICAL_PROCESS_INVOLVED_IN_INTERACTION_WITH_HOST	0.336499	0.997008	0.926964	0.00112472	0.0168239	0.0131408
GOBP_BIOLOGICAL_PROCESS_INVOLVED_IN_INTERACTION_WITH_SYMBIONT	0.55856	1	0.929747	0.527557	0.738348	0.57671
GOBP_BIOLOGICAL_PROCESS_INVOLVED_IN_INTRASPECIES_INTERACTION_BETWEEN_ORGANISMS	0.897438	1	0.929747	0.938518	0.975428	0.761889
GOBP_BIOMINERALIZATION	0.970792	1	0.929747	0.00187076	0.0236064	0.0184385
GOBP_BLASTOCYST_DEVELOPMENT	0.0059077	0.116599	0.108408	0.527557	0.738348	0.57671
GOBP_BLASTOCYST_FORMATION	0.187572	0.800615	0.744369	0.551343	0.747036	0.583496
GOBP_BLASTOCYST_GROWTH	0.00770969	0.13482	0.125348	0.63872	0.800837	0.625519
GOBP_BLASTODERM_SEGMENTATION	1	1	1	0.63872	0.800837	0.625519
GOBP_BLEB_ASSEMBLY	1	1	1	0.0925834	0.289676	0.226261
GOBP_BLOOD_COAGULATION_INTRINSIC_PATHWAY	0.545031	1	0.929747	1	1	1
GOBP_BLOOD_VESSEL_ENDOTHELIAL_CELL_DIFFERENTIATION	0.38194	0.997008	0.926964	0.44528	0.703978	0.549865
GOBP_BLOOD_VESSEL_ENDOTHELIAL_CELL_MIGRATION	0.625649	1	0.929747	0.0738794	0.254222	0.198568
GOBP_BLOOD_VESSEL_ENDOTHELIAL_CELL_PROLIFERATION_INVOLVED_IN_SPROUTING_ANGIOGENESIS	1	1	1	0.780219	0.887515	0.693222
GOBP_BLOOD_VESSEL_REMODELING	0.860589	1	0.929747	0.418815	0.693131	0.541392
GOBP_BODY_FLUID_SECRETION	0.976946	1	0.929747	0.0138734	0.0882443	0.068926
GOBP_BODY_MORPHOGENESIS	0.86657	1	0.929747	0.0312803	0.148018	0.115614
GOBP_BONE_CELL_DEVELOPMENT	0.753552	1	0.929747	0.820097	0.909722	0.710567
GOBP_BONE_DEVELOPMENT	0.989848	1	0.929747	0.0117157	0.0797884	0.0623213
GOBP_BONE_GROWTH	1	1	1	0.151597	0.392007	0.306189
GOBP_BONE_MATURATION	1	1	1	0.6924	0.831751	0.649665
GOBP_BONE_MINERALIZATION	1	1	1	0.000225798	0.00496756	0.00388007
GOBP_BONE_MINERALIZATION_INVOLVED_IN_BONE_MATURATION	1	1	1	0.44528	0.703978	0.549865
GOBP_BONE_MORPHOGENESIS	1	1	1	0.00703635	0.056533	0.0441569
GOBP_BONE_REMODELING	0.898994	1	0.929747	0.000687002	0.0114119	0.00891364
GOBP_BONE_RESORPTION	0.749908	1	0.929747	0.406281	0.689139	0.538274
GOBP_BONE_TRABECULA_MORPHOGENESIS	1	1	1	0.0218311	0.114668	0.0895649
GOBP_BRAIN_MORPHOGENESIS	0.0610124	0.481114	0.447315	0.846846	0.927161	0.724189
GOBP_BRANCH_ELONGATION_OF_AN_EPITHELIUM	1	1	1	1	1	1
GOBP_BRANCHED_CHAIN_AMINO_ACID_METABOLIC_PROCESS	1	1	1	0.0294642	0.142801	0.111539
GOBP_BRANCHING_INVOLVED_IN_BLOOD_VESSEL_MORPHOGENESIS	0.430435	0.997008	0.926964	0.260377	0.527103	0.411711
GOBP_BRANCHING_INVOLVED_IN_LABYRINTHINE_LAYER_MORPHOGENESIS	1	1	1	1	1	1
GOBP_BRANCHING_INVOLVED_IN_MAMMARY_GLAND_DUCT_MORPHOGENESIS	1	1	1	1	1	1
GOBP_BRANCHING_INVOLVED_IN_PROSTATE_GLAND_MORPHOGENESIS	1	1	1	0.474225	0.709902	0.554491
GOBP_BRANCHING_INVOLVED_IN_SALIVARY_GLAND_MORPHOGENESIS	1	1	1	1	1	1
GOBP_BRANCHING_MORPHOGENESIS_OF_A_NERVE	1	1	1	1	1	1
GOBP_BRANCHING_MORPHOGENESIS_OF_AN_EPITHELIAL_TUBE	0.865782	1	0.929747	0.213206	0.476032	0.37182
GOBP_BROWN_FAT_CELL_DIFFERENTIATION	0.591486	1	0.929747	0.699819	0.838266	0.654754
GOBP_BUNDLE_OF_HIS_CELL_TO_PURKINJE_MYOCYTE_COMMUNICATION	1	1	1	0.527668	0.738348	0.57671
GOBP_C_TERMINAL_PROTEIN_AMINO_ACID_MODIFICATION	0.118521	0.63393	0.589394	1	1	1
GOBP_C21_STEROID_HORMONE_BIOSYNTHETIC_PROCESS	1	1	1	0.751787	0.869772	0.679363
GOBP_C21_STEROID_HORMONE_METABOLIC_PROCESS	1	1	1	0.347141	0.636426	0.4971
GOBP_C4_DICARBOXYLATE_TRANSPORT	0.0810982	0.54632	0.507939	0.723683	0.853471	0.66663
GOBP_CALCINEURIN_MEDIATED_SIGNALING	0.314468	0.997008	0.926964	0.699819	0.838266	0.654754
GOBP_CALCIUM_DEPENDENT_CELL_CELL_ADHESION_VIA_PLASMA_MEMBRANE_CELL_ADHESION_MOLECULES	1	1	1	0.663894	0.819049	0.639744
GOBP_CALCIUM_IMPORT_INTO_THE_MITOCHONDRION	0.433732	0.997008	0.926964	1	1	1
GOBP_CALCIUM_INDEPENDENT_CELL_CELL_ADHESION_VIA_PLASMA_MEMBRANE_CELL_ADHESION_MOLECULES	1	1	1	1	1	1
GOBP_CALCIUM_ION_EXPORT	1	1	1	1	1	1
GOBP_CALCIUM_ION_IMPORT	0.973698	1	0.929747	0.0673425	0.238796	0.186519
GOBP_CALCIUM_ION_IMPORT_INTO_CYTOSOL	1	1	1	0.0216161	0.114668	0.0895649
GOBP_CALCIUM_ION_REGULATED_EXOCYTOSIS	0.757796	1	0.929747	0.230914	0.494799	0.386478
GOBP_CALCIUM_ION_REGULATED_EXOCYTOSIS_OF_NEUROTRANSMITTER	0.524674	1	0.929747	0.221332	0.477432	0.372914
GOBP_CALCIUM_ION_TRANSMEMBRANE_TRANSPORT	0.951162	1	0.929747	0.115852	0.335686	0.262198
GOBP_CALCIUM_ION_TRANSMEMBRANE_TRANSPORT_VIA_HIGH_VOLTAGE_GATED_CALCIUM_CHANNEL	0.524674	1	0.929747	0.221332	0.477432	0.372914
GOBP_CALCIUM_ION_TRANSPORT	0.99683	1	0.929747	0.000209257	0.00477879	0.00373263
GOBP_CALCIUM_ION_TRANSPORT_INTO_CYTOSOL	0.998739	1	0.929747	0.000968329	0.0149593	0.0116844
GOBP_CALCIUM_MEDIATED_SIGNALING	0.99177	1	0.929747	0.030167	0.144811	0.11311
GOBP_CALCIUM_MEDIATED_SIGNALING_USING_INTRACELLULAR_CALCIUM_SOURCE	1	1	1	0.31963	0.599592	0.468331
GOBP_CAMERA_TYPE_EYE_DEVELOPMENT	0.858798	1	0.929747	0.0888229	0.289328	0.225989
GOBP_CAMERA_TYPE_EYE_MORPHOGENESIS	0.730615	1	0.929747	0.558642	0.755038	0.589746
GOBP_CAMERA_TYPE_EYE_PHOTORECEPTOR_CELL_DIFFERENTIATION	1	1	1	0.738112	0.863459	0.674432
GOBP_CAMP_BIOSYNTHETIC_PROCESS	1	1	1	1	1	1
GOBP_CAMP_MEDIATED_SIGNALING	0.749908	1	0.929747	0.406281	0.689139	0.538274
GOBP_CAMP_METABOLIC_PROCESS	1	1	1	1	1	1
GOBP_CANONICAL_WNT_SIGNALING_PATHWAY	0.565676	1	0.929747	0.151798	0.392285	0.306407
GOBP_CARBOHYDRATE_BIOSYNTHETIC_PROCESS	0.795492	1	0.929747	0.00309036	0.0323043	0.0252323
GOBP_CARBOHYDRATE_CATABOLIC_PROCESS	0.0107074	0.167303	0.155549	0.22933	0.492793	0.384912
GOBP_CARBOHYDRATE_DERIVATIVE_CATABOLIC_PROCESS	0.610317	1	0.929747	4.15762e-06	0.000210486	0.000164407
GOBP_CARBOHYDRATE_DERIVATIVE_TRANSPORT	0.871301	1	0.929747	0.135382	0.371814	0.290417
GOBP_CARBOHYDRATE_HOMEOSTASIS	0.970914	1	0.929747	0.221284	0.477432	0.372914
GOBP_CARBOHYDRATE_PHOSPHORYLATION	1	1	1	0.0339415	0.153688	0.120043
GOBP_CARBOHYDRATE_TRANSMEMBRANE_TRANSPORT	0.878554	1	0.929747	0.567199	0.761947	0.595143
GOBP_CARBOHYDRATE_TRANSPORT	0.885661	1	0.929747	0.155435	0.39923	0.311831
GOBP_CARBOXYLIC_ACID_TRANSPORT	0.778506	1	0.929747	0.159758	0.404082	0.315621
GOBP_CARDIAC_ATRIUM_DEVELOPMENT	0.783906	1	0.929747	0.274723	0.545695	0.426232
GOBP_CARDIAC_ATRIUM_MORPHOGENESIS	0.718941	1	0.929747	0.788681	0.891504	0.696337
GOBP_CARDIAC_CELL_DEVELOPMENT	0.695329	1	0.929747	0.436821	0.703978	0.549865
GOBP_CARDIAC_CELL_FATE_COMMITMENT	0.433732	0.997008	0.926964	1	1	1
GOBP_CARDIAC_CHAMBER_DEVELOPMENT	0.630855	1	0.929747	0.389296	0.688078	0.537445
GOBP_CARDIAC_CHAMBER_MORPHOGENESIS	0.874889	1	0.929747	0.393133	0.689139	0.538274
GOBP_CARDIAC_CONDUCTION	0.99856	1	0.929747	0.374314	0.671104	0.524187
GOBP_CARDIAC_CONDUCTION_SYSTEM_DEVELOPMENT	0.433732	0.997008	0.926964	1	1	1
GOBP_CARDIAC_EPITHELIAL_TO_MESENCHYMAL_TRANSITION	0.742516	1	0.929747	0.810181	0.90542	0.707207
GOBP_CARDIAC_LEFT_VENTRICLE_MORPHOGENESIS	0.457979	0.997008	0.926964	0.527668	0.738348	0.57671
GOBP_CARDIAC_MUSCLE_CELL_ACTION_POTENTIAL	1	1	1	0.0439552	0.180805	0.141224
GOBP_CARDIAC_MUSCLE_CELL_ACTION_POTENTIAL_INVOLVED_IN_CONTRACTION	1	1	1	0.310369	0.590389	0.461142
GOBP_CARDIAC_MUSCLE_CELL_CONTRACTION	1	1	1	0.172464	0.420355	0.328332
GOBP_CARDIAC_MUSCLE_CELL_DIFFERENTIATION	0.541755	1	0.929747	0.550007	0.747036	0.583496
GOBP_CARDIAC_MUSCLE_CELL_MEMBRANE_REPOLARIZATION	0.802038	1	0.929747	0.303621	0.580179	0.453167
GOBP_CARDIAC_MUSCLE_CELL_MYOBLAST_DIFFERENTIATION	0.0778596	0.535543	0.497919	0.44528	0.703978	0.549865
GOBP_CARDIAC_MUSCLE_CELL_PROLIFERATION	0.101628	0.615156	0.571939	0.588757	0.775573	0.605786
GOBP_CARDIAC_MUSCLE_CONTRACTION	1	1	1	0.0948384	0.294757	0.230229
GOBP_CARDIAC_MUSCLE_TISSUE_DEVELOPMENT	0.278543	0.949269	0.882579	0.40177	0.689139	0.538274
GOBP_CARDIAC_MUSCLE_TISSUE_MORPHOGENESIS	0.917636	1	0.929747	0.805128	0.904101	0.706177
GOBP_CARDIAC_MYOFIBRIL_ASSEMBLY	0.524674	1	0.929747	0.221332	0.477432	0.372914
GOBP_CARDIAC_NEURAL_CREST_CELL_DIFFERENTIATION_INVOLVED_IN_HEART_DEVELOPMENT	1	1	1	0.44528	0.703978	0.549865
GOBP_CARDIAC_RIGHT_VENTRICLE_MORPHOGENESIS	1	1	1	0.657579	0.814368	0.636088
GOBP_CARDIAC_SEPTUM_DEVELOPMENT	0.592435	1	0.929747	0.565787	0.761609	0.594879
GOBP_CARDIAC_SEPTUM_MORPHOGENESIS	0.939419	1	0.929747	0.655594	0.814368	0.636088
GOBP_CARDIAC_VASCULAR_SMOOTH_MUSCLE_CELL_DIFFERENTIATION	0.354297	0.997008	0.926964	1	1	1
GOBP_CARDIAC_VENTRICLE_DEVELOPMENT	0.871125	1	0.929747	0.851811	0.930657	0.726919
GOBP_CARDIAC_VENTRICLE_MORPHOGENESIS	0.951357	1	0.929747	0.705045	0.842136	0.657777
GOBP_CARDIOBLAST_DIFFERENTIATION	0.194271	0.803931	0.747452	0.63872	0.800837	0.625519
GOBP_CARDIOCYTE_DIFFERENTIATION	0.743049	1	0.929747	0.478986	0.715245	0.558665
GOBP_CARDIOLIPIN_METABOLIC_PROCESS	1	1	1	0.618822	0.790122	0.61715
GOBP_CARNITINE_METABOLIC_PROCESS	1	1	1	1	1	1
GOBP_CARNITINE_SHUTTLE	1	1	1	1	1	1
GOBP_CARTILAGE_DEVELOPMENT	0.997141	1	0.929747	3.53017e-06	0.000188936	0.000147575
GOBP_CARTILAGE_DEVELOPMENT_INVOLVED_IN_ENDOCHONDRAL_BONE_MORPHOGENESIS	1	1	1	0.0440181	0.180805	0.141224
GOBP_CATECHOL_CONTAINING_COMPOUND_BIOSYNTHETIC_PROCESS	1	1	1	0.657579	0.814368	0.636088
GOBP_CATECHOL_CONTAINING_COMPOUND_CATABOLIC_PROCESS	1	1	1	0.0128723	0.0834713	0.0651979
GOBP_CATECHOL_CONTAINING_COMPOUND_METABOLIC_PROCESS	1	1	1	0.0524511	0.201094	0.157071
GOBP_CATECHOLAMINE_SECRETION	0.901839	1	0.929747	0.29845	0.575979	0.449887
GOBP_CATECHOLAMINE_UPTAKE	1	1	1	1	1	1
GOBP_CATECHOLAMINE_UPTAKE_INVOLVED_IN_SYNAPTIC_TRANSMISSION	1	1	1	1	1	1
GOBP_CAVEOLIN_MEDIATED_ENDOCYTOSIS	0.408402	0.997008	0.926964	0.126883	0.353327	0.275977
GOBP_CD4_POSITIVE_ALPHA_BETA_T_CELL_ACTIVATION	0.987542	1	0.929747	0.772217	0.88288	0.689601
GOBP_CD4_POSITIVE_ALPHA_BETA_T_CELL_CYTOKINE_PRODUCTION	1	1	1	0.618822	0.790122	0.61715
GOBP_CD4_POSITIVE_ALPHA_BETA_T_CELL_DIFFERENTIATION	0.971282	1	0.929747	0.61556	0.790122	0.61715
GOBP_CD4_POSITIVE_ALPHA_BETA_T_CELL_PROLIFERATION	1	1	1	0.474225	0.709902	0.554491
GOBP_CD4_POSITIVE_OR_CD8_POSITIVE_ALPHA_BETA_T_CELL_LINEAGE_COMMITMENT	1	1	1	0.6924	0.831751	0.649665
GOBP_CD40_SIGNALING_PATHWAY	0.133039	0.673171	0.625878	0.182563	0.430247	0.336058
GOBP_CD8_POSITIVE_ALPHA_BETA_T_CELL_ACTIVATION	0.69321	1	0.929747	0.414762	0.689139	0.538274
GOBP_CD8_POSITIVE_ALPHA_BETA_T_CELL_DIFFERENTIATION	0.457979	0.997008	0.926964	0.163583	0.404082	0.315621
GOBP_CDC42_PROTEIN_SIGNAL_TRANSDUCTION	0.118521	0.63393	0.589394	0.00483017	0.0427292	0.033375
GOBP_CDP_DIACYLGLYCEROL_BIOSYNTHETIC_PROCESS	1	1	1	1	1	1
GOBP_CELL_ADHESION_MEDIATED_BY_INTEGRIN	0.600271	1	0.929747	6.8931e-07	5.67938e-05	4.43606e-05
GOBP_CELL_ADHESION_MOLECULE_PRODUCTION	1	1	1	0.396213	0.689139	0.538274
GOBP_CELL_AGGREGATION	1	1	1	0.339073	0.624084	0.48746
GOBP_CELL_AGING	0.119896	0.640267	0.595286	0.393133	0.689139	0.538274
GOBP_CELL_CELL_ADHESION_INVOLVED_IN_GASTRULATION	1	1	1	1	1	1
GOBP_CELL_CELL_ADHESION_MEDIATED_BY_CADHERIN	1	1	1	0.433021	0.703978	0.549865
GOBP_CELL_CELL_ADHESION_MEDIATED_BY_INTEGRIN	1	1	1	0.00139522	0.0194774	0.0152134
GOBP_CELL_CELL_ADHESION_VIA_PLASMA_MEMBRANE_ADHESION_MOLECULES	0.99992	1	0.929747	0.0793496	0.267169	0.208681
GOBP_CELL_CELL_JUNCTION_ASSEMBLY	0.879339	1	0.929747	0.237878	0.507393	0.396316
GOBP_CELL_CELL_JUNCTION_MAINTENANCE	1	1	1	0.527668	0.738348	0.57671
GOBP_CELL_CELL_JUNCTION_ORGANIZATION	0.947721	1	0.929747	0.0465888	0.187695	0.146605
GOBP_CELL_CELL_RECOGNITION	1	1	1	0.23825	0.507533	0.396425
GOBP_CELL_CELL_SIGNALING_INVOLVED_IN_CARDIAC_CONDUCTION	1	1	1	0.51935	0.738348	0.57671
GOBP_CELL_CHEMOTAXIS	0.977894	1	0.929747	2.57519e-10	1.20233e-07	9.39116e-08
GOBP_CELL_COMMUNICATION_BY_ELECTRICAL_COUPLING	1	1	1	0.020964	0.113863	0.088936
GOBP_CELL_COMMUNICATION_BY_ELECTRICAL_COUPLING_INVOLVED_IN_CARDIAC_CONDUCTION	1	1	1	0.127137	0.353327	0.275977
GOBP_CELL_COMMUNICATION_INVOLVED_IN_CARDIAC_CONDUCTION	1	1	1	0.175155	0.424698	0.331724
GOBP_CELL_CYCLE_ARREST	0.0457531	0.404232	0.375833	0.454058	0.709012	0.553796
GOBP_CELL_CYCLE_CHECKPOINT	0.00857395	0.145412	0.135197	0.964539	0.992651	0.775341
GOBP_CELL_CYCLE_DNA_REPLICATION	0.939419	1	0.929747	0.655594	0.814368	0.636088
GOBP_CELL_CYCLE_G1_S_PHASE_TRANSITION	0.0176834	0.231323	0.215072	0.593837	0.775573	0.605786
GOBP_CELL_CYCLE_G2_M_PHASE_TRANSITION	0.135569	0.677846	0.630225	0.780727	0.887629	0.69331
GOBP_CELL_DEATH_IN_RESPONSE_TO_HYDROGEN_PEROXIDE	1	1	1	1	1	1
GOBP_CELL_DEATH_IN_RESPONSE_TO_OXIDATIVE_STRESS	0.979794	1	0.929747	0.31944	0.599592	0.468331
GOBP_CELL_DIFFERENTIATION_IN_HINDBRAIN	1	1	1	1	1	1
GOBP_CELL_DIFFERENTIATION_IN_SPINAL_CORD	1	1	1	1	1	1
GOBP_CELL_DIFFERENTIATION_INVOLVED_IN_EMBRYONIC_PLACENTA_DEVELOPMENT	1	1	1	1	1	1
GOBP_CELL_DIFFERENTIATION_INVOLVED_IN_KIDNEY_DEVELOPMENT	1	1	1	0.588757	0.775573	0.605786
GOBP_CELL_DIFFERENTIATION_INVOLVED_IN_METANEPHROS_DEVELOPMENT	1	1	1	0.139184	0.377324	0.294721
GOBP_CELL_FATE_COMMITMENT	0.636311	1	0.929747	0.76467	0.878875	0.686473
GOBP_CELL_FATE_COMMITMENT_INVOLVED_IN_FORMATION_OF_PRIMARY_GERM_LAYER	0.116067	0.63393	0.589394	0.777036	0.886053	0.69208
GOBP_CELL_FATE_DETERMINATION	0.52869	1	0.929747	0.889013	0.949576	0.741696
GOBP_CELL_FATE_SPECIFICATION	0.895409	1	0.929747	0.680099	0.826424	0.645505
GOBP_CELL_GROWTH	0.85805	1	0.929747	0.00500355	0.0439852	0.034356
GOBP_CELL_JUNCTION_ASSEMBLY	0.874969	1	0.929747	0.0573646	0.21275	0.166175
GOBP_CELL_JUNCTION_DISASSEMBLY	1	1	1	0.280381	0.5508	0.43022
GOBP_CELL_JUNCTION_MAINTENANCE	1	1	1	0.820097	0.909722	0.710567
GOBP_CELL_KILLING	0.982966	1	0.929747	0.0112291	0.0778633	0.0608176
GOBP_CELL_MATRIX_ADHESION	0.525063	1	0.929747	1.24094e-07	1.48984e-05	1.16369e-05
GOBP_CELL_MATURATION	0.975284	1	0.929747	0.768591	0.882221	0.689087
GOBP_CELL_MIGRATION_IN_HINDBRAIN	1	1	1	1	1	1
GOBP_CELL_MIGRATION_INVOLVED_IN_GASTRULATION	1	1	1	0.552318	0.747036	0.583496
GOBP_CELL_MIGRATION_INVOLVED_IN_HEART_DEVELOPMENT	1	1	1	0.618822	0.790122	0.61715
GOBP_CELL_MIGRATION_INVOLVED_IN_SPROUTING_ANGIOGENESIS	0.567171	1	0.929747	0.211296	0.472772	0.369273
GOBP_CELL_PROLIFERATION_IN_FOREBRAIN	0.665127	1	0.929747	0.738112	0.863459	0.674432
GOBP_CELL_PROLIFERATION_IN_HINDBRAIN	1	1	1	0.59783	0.775573	0.605786
GOBP_CELL_PROLIFERATION_INVOLVED_IN_HEART_MORPHOGENESIS	0.503407	1	0.929747	1	1	1
GOBP_CELL_PROLIFERATION_INVOLVED_IN_KIDNEY_DEVELOPMENT	1	1	1	0.0935068	0.291049	0.227333
GOBP_CELL_PROLIFERATION_INVOLVED_IN_METANEPHROS_DEVELOPMENT	1	1	1	0.0925834	0.289676	0.226261
GOBP_CELL_RECOGNITION	0.99995	1	0.929747	0.0805063	0.27063	0.211384
GOBP_CELL_REDOX_HOMEOSTASIS	0.847814	1	0.929747	0.00151026	0.0203401	0.0158873
GOBP_CELL_SUBSTRATE_ADHESION	0.905295	1	0.929747	6.28765e-12	6.60518e-09	5.15919e-09
GOBP_CELL_SUBSTRATE_JUNCTION_ORGANIZATION	0.301095	0.987399	0.918031	0.00345245	0.0351264	0.0274366
GOBP_CELL_SURFACE_RECEPTOR_SIGNALING_PATHWAY_INVOLVED_IN_HEART_DEVELOPMENT	0.718941	1	0.929747	0.788681	0.891504	0.696337
GOBP_CELL_VOLUME_HOMEOSTASIS	0.354005	0.997008	0.926964	0.45097	0.705501	0.551054
GOBP_CELLULAR_ALDEHYDE_METABOLIC_PROCESS	0.509326	1	0.929747	0.0449851	0.182989	0.142929
GOBP_CELLULAR_AMINO_ACID_BIOSYNTHETIC_PROCESS	0.847412	1	0.929747	0.0469104	0.188069	0.146898
GOBP_CELLULAR_AMINO_ACID_CATABOLIC_PROCESS	0.990432	1	0.929747	0.00120411	0.0174484	0.0136287
GOBP_CELLULAR_AMINO_ACID_METABOLIC_PROCESS	0.843008	1	0.929747	0.014574	0.0914031	0.0713933
GOBP_CELLULAR_ANION_HOMEOSTASIS	1	1	1	1	1	1
GOBP_CELLULAR_BIOGENIC_AMINE_METABOLIC_PROCESS	0.989082	1	0.929747	0.0026789	0.0295453	0.0230773
GOBP_CELLULAR_CARBOHYDRATE_BIOSYNTHETIC_PROCESS	0.718071	1	0.929747	0.291791	0.568432	0.443992
GOBP_CELLULAR_CARBOHYDRATE_CATABOLIC_PROCESS	0.140631	0.688786	0.640396	0.919579	0.964571	0.753409
GOBP_CELLULAR_CARBOHYDRATE_METABOLIC_PROCESS	0.792656	1	0.929747	0.118017	0.340361	0.26585
GOBP_CELLULAR_COMPONENT_ASSEMBLY_INVOLVED_IN_MORPHOGENESIS	0.426753	0.997008	0.926964	0.00579196	0.0488711	0.0381723
GOBP_CELLULAR_COMPONENT_DISASSEMBLY_INVOLVED_IN_EXECUTION_PHASE_OF_APOPTOSIS	0.187572	0.800615	0.744369	0.274723	0.545695	0.426232
GOBP_CELLULAR_COMPONENT_MAINTENANCE	0.498562	1	0.929747	0.634217	0.800837	0.625519
GOBP_CELLULAR_COPPER_ION_HOMEOSTASIS	0.0199504	0.245739	0.228475	1	1	1
GOBP_CELLULAR_DEFENSE_RESPONSE	0.678573	1	0.929747	0.00175706	0.0229291	0.0179095
GOBP_CELLULAR_EXTRAVASATION	0.953446	1	0.929747	1.25331e-05	0.000523287	0.00040873
GOBP_CELLULAR_GLUCAN_METABOLIC_PROCESS	0.628012	1	0.929747	0.908131	0.959027	0.749078
GOBP_CELLULAR_GLUCOSE_HOMEOSTASIS	0.748466	1	0.929747	0.136436	0.373003	0.291346
GOBP_CELLULAR_GLUCURONIDATION	1	1	1	0.00306872	0.0322369	0.0251796
GOBP_CELLULAR_HORMONE_METABOLIC_PROCESS	1	1	1	2.07691e-06	0.000130992	0.000102315
GOBP_CELLULAR_HYPEROSMOTIC_RESPONSE	0.118521	0.63393	0.589394	0.163583	0.404082	0.315621
GOBP_CELLULAR_IRON_ION_HOMEOSTASIS	0.807191	1	0.929747	0.499355	0.725028	0.566306
GOBP_CELLULAR_KETONE_METABOLIC_PROCESS	0.763734	1	0.929747	0.347386	0.636596	0.497233
GOBP_CELLULAR_LIPID_CATABOLIC_PROCESS	0.525063	1	0.929747	0.000420978	0.0080043	0.00625201
GOBP_CELLULAR_METABOLIC_COMPOUND_SALVAGE	0.0140674	0.198651	0.184695	0.0989525	0.302399	0.236198
GOBP_CELLULAR_MODIFIED_AMINO_ACID_BIOSYNTHETIC_PROCESS	0.614797	1	0.929747	0.0375762	0.166427	0.129993
GOBP_CELLULAR_MODIFIED_AMINO_ACID_CATABOLIC_PROCESS	0.753552	1	0.929747	0.0831127	0.274753	0.214605
GOBP_CELLULAR_MODIFIED_AMINO_ACID_METABOLIC_PROCESS	0.855462	1	0.929747	1.35829e-05	0.000538448	0.000420572
GOBP_CELLULAR_MONOVALENT_INORGANIC_CATION_HOMEOSTASIS	0.730615	1	0.929747	0.251351	0.521574	0.407392
GOBP_CELLULAR_OXIDANT_DETOXIFICATION	0.936265	1	0.929747	1.0496e-08	1.91757e-06	1.49778e-06
GOBP_CELLULAR_PIGMENTATION	0.181906	0.791152	0.735571	0.286587	0.561156	0.438309
GOBP_CELLULAR_POTASSIUM_ION_HOMEOSTASIS	1	1	1	0.501661	0.725028	0.566306
GOBP_CELLULAR_PROCESS_INVOLVED_IN_REPRODUCTION_IN_MULTICELLULAR_ORGANISM	0.986885	1	0.929747	0.768637	0.882221	0.689087
GOBP_CELLULAR_PROTEIN_COMPLEX_DISASSEMBLY	9.35467e-06	0.000493312	0.000458656	0.0708313	0.246998	0.192926
GOBP_CELLULAR_PROTEIN_CONTAINING_COMPLEX_LOCALIZATION	0.226068	0.861152	0.800653	0.675456	0.823401	0.643143
GOBP_CELLULAR_RESPIRATION	0.0146503	0.204317	0.189963	0.989442	1	0.781082
GOBP_CELLULAR_RESPONSE_TO_ABIOTIC_STIMULUS	0.547237	1	0.929747	0.00215855	0.0262905	0.0205351
GOBP_CELLULAR_RESPONSE_TO_ACID_CHEMICAL	0.0744231	0.535543	0.497919	0.067439	0.238936	0.186629
GOBP_CELLULAR_RESPONSE_TO_ACIDIC_PH	1	1	1	0.126883	0.353327	0.275977
GOBP_CELLULAR_RESPONSE_TO_ALCOHOL	0.898994	1	0.929747	0.0421732	0.176203	0.137629
GOBP_CELLULAR_RESPONSE_TO_ALDEHYDE	1	1	1	0.474225	0.709902	0.554491
GOBP_CELLULAR_RESPONSE_TO_ALKALOID	1	1	1	0.232019	0.495398	0.386946
GOBP_CELLULAR_RESPONSE_TO_AMYLOID_BETA	0.52869	1	0.929747	0.0606145	0.22206	0.173447
GOBP_CELLULAR_RESPONSE_TO_ANTIBIOTIC	0.433732	0.997008	0.926964	0.501661	0.725028	0.566306
GOBP_CELLULAR_RESPONSE_TO_ARSENIC_CONTAINING_SUBSTANCE	0.545031	1	0.929747	0.618822	0.790122	0.61715
GOBP_CELLULAR_RESPONSE_TO_ATP	1	1	1	1	1	1
GOBP_CELLULAR_RESPONSE_TO_BIOTIC_STIMULUS	0.973311	1	0.929747	0.000215295	0.00481338	0.00375964
GOBP_CELLULAR_RESPONSE_TO_BRAIN_DERIVED_NEUROTROPHIC_FACTOR_STIMULUS	1	1	1	1	1	1
GOBP_CELLULAR_RESPONSE_TO_CADMIUM_ION	0.810526	1	0.929747	0.0460464	0.185867	0.145177
GOBP_CELLULAR_RESPONSE_TO_CAFFEINE	1	1	1	0.0925834	0.289676	0.226261
GOBP_CELLULAR_RESPONSE_TO_CALCIUM_ION	0.866817	1	0.929747	0.61556	0.790122	0.61715
GOBP_CELLULAR_RESPONSE_TO_CAMP	1	1	1	0.00153389	0.0205923	0.0160843
GOBP_CELLULAR_RESPONSE_TO_CARBOHYDRATE_STIMULUS	0.708751	1	0.929747	0.293448	0.571129	0.446098
GOBP_CELLULAR_RESPONSE_TO_CHEMICAL_STRESS	0.881671	1	0.929747	1.29514e-05	0.000523287	0.00040873
GOBP_CELLULAR_RESPONSE_TO_CHOLESTEROL	1	1	1	0.0734862	0.253313	0.197859
GOBP_CELLULAR_RESPONSE_TO_COPPER_ION	0.33825	0.997008	0.926964	0.433021	0.703978	0.549865
GOBP_CELLULAR_RESPONSE_TO_CORTICOSTEROID_STIMULUS	0.476685	1	0.929747	0.0915928	0.289676	0.226261
GOBP_CELLULAR_RESPONSE_TO_DEXAMETHASONE_STIMULUS	0.125563	0.658039	0.611809	0.0159573	0.0964329	0.0753219
GOBP_CELLULAR_RESPONSE_TO_DRUG	0.936701	1	0.929747	0.965955	0.993378	0.775909
GOBP_CELLULAR_RESPONSE_TO_DSRNA	0.24211	0.88433	0.822203	0.00478024	0.0427292	0.033375
GOBP_CELLULAR_RESPONSE_TO_ELECTRICAL_STIMULUS	0.408402	0.997008	0.926964	0.474225	0.709902	0.554491
GOBP_CELLULAR_RESPONSE_TO_EPINEPHRINE_STIMULUS	1	1	1	1	1	1
GOBP_CELLULAR_RESPONSE_TO_ESTRADIOL_STIMULUS	0.793171	1	0.929747	0.566766	0.761609	0.594879
GOBP_CELLULAR_RESPONSE_TO_ESTROGEN_STIMULUS	1	1	1	0.552318	0.747036	0.583496
GOBP_CELLULAR_RESPONSE_TO_ETHANOL	0.503407	1	0.929747	0.201841	0.458451	0.358088
GOBP_CELLULAR_RESPONSE_TO_EXOGENOUS_DSRNA	0.545031	1	0.929747	0.00184963	0.0234808	0.0183404
GOBP_CELLULAR_RESPONSE_TO_EXTERNAL_STIMULUS	0.155344	0.732395	0.680942	0.00246214	0.0285012	0.0222617
GOBP_CELLULAR_RESPONSE_TO_EXTRACELLULAR_STIMULUS	0.0457531	0.404232	0.375833	0.00583385	0.0491259	0.0383714
GOBP_CELLULAR_RESPONSE_TO_FATTY_ACID	0.810526	1	0.929747	0.596452	0.775573	0.605786
GOBP_CELLULAR_RESPONSE_TO_FLUID_SHEAR_STRESS	0.545031	1	0.929747	0.240963	0.507533	0.396425
GOBP_CELLULAR_RESPONSE_TO_GAMMA_RADIATION	0.33825	0.997008	0.926964	0.433021	0.703978	0.549865
GOBP_CELLULAR_RESPONSE_TO_GLUCAGON_STIMULUS	0.306415	0.989619	0.920094	0.151597	0.392007	0.306189
GOBP_CELLULAR_RESPONSE_TO_GLUCOSE_STARVATION	0.614797	1	0.929747	0.460583	0.709902	0.554491
GOBP_CELLULAR_RESPONSE_TO_GONADOTROPIN_STIMULUS	1	1	1	0.182563	0.430247	0.336058
GOBP_CELLULAR_RESPONSE_TO_GROWTH_HORMONE_STIMULUS	0.665127	1	0.929747	0.738112	0.863459	0.674432
GOBP_CELLULAR_RESPONSE_TO_HEAT	0.0053239	0.107045	0.0995244	0.174518	0.423887	0.33109
GOBP_CELLULAR_RESPONSE_TO_HYDROGEN_PEROXIDE	0.746316	1	0.929747	0.18917	0.441362	0.34474
GOBP_CELLULAR_RESPONSE_TO_INCREASED_OXYGEN_LEVELS	0.457979	0.997008	0.926964	0.163583	0.404082	0.315621
GOBP_CELLULAR_RESPONSE_TO_INORGANIC_SUBSTANCE	0.955653	1	0.929747	0.0971995	0.298999	0.233543
GOBP_CELLULAR_RESPONSE_TO_INSULIN_STIMULUS	0.374528	0.997008	0.926964	0.398614	0.689139	0.538274
GOBP_CELLULAR_RESPONSE_TO_INTERFERON_ALPHA	1	1	1	0.0170225	0.0990699	0.0773817
GOBP_CELLULAR_RESPONSE_TO_INTERFERON_BETA	0.601026	1	0.929747	0.00385702	0.0372579	0.0291015
GOBP_CELLULAR_RESPONSE_TO_IONIZING_RADIATION	0.530482	1	0.929747	0.441772	0.703978	0.549865
GOBP_CELLULAR_RESPONSE_TO_KETONE	0.55856	1	0.929747	0.0503393	0.194417	0.151856
GOBP_CELLULAR_RESPONSE_TO_LEPTIN_STIMULUS	0.564518	1	0.929747	1	1	1
GOBP_CELLULAR_RESPONSE_TO_LEUCINE	1	1	1	1	1	1
GOBP_CELLULAR_RESPONSE_TO_LEUCINE_STARVATION	1	1	1	1	1	1
GOBP_CELLULAR_RESPONSE_TO_LIGHT_STIMULUS	0.210234	0.831817	0.773379	0.0451928	0.183656	0.14345
GOBP_CELLULAR_RESPONSE_TO_LIPOPROTEIN_PARTICLE_STIMULUS	0.774228	1	0.929747	0.00159944	0.0213361	0.0166652
GOBP_CELLULAR_RESPONSE_TO_LITHIUM_ION	1	1	1	0.501661	0.725028	0.566306
GOBP_CELLULAR_RESPONSE_TO_LOW_DENSITY_LIPOPROTEIN_PARTICLE_STIMULUS	1	1	1	0.00478024	0.0427292	0.033375
GOBP_CELLULAR_RESPONSE_TO_MANGANESE_ION	1	1	1	1	1	1
GOBP_CELLULAR_RESPONSE_TO_MECHANICAL_STIMULUS	0.960945	1	0.929747	0.038419	0.168743	0.131802
GOBP_CELLULAR_RESPONSE_TO_MOLECULE_OF_BACTERIAL_ORIGIN	0.947721	1	0.929747	0.000241494	0.00517733	0.00404392
GOBP_CELLULAR_RESPONSE_TO_NITROGEN_STARVATION	0.0161811	0.217511	0.20223	1	1	1
GOBP_CELLULAR_RESPONSE_TO_NUTRIENT	0.541761	1	0.929747	0.065988	0.235383	0.183854
GOBP_CELLULAR_RESPONSE_TO_OSMOTIC_STRESS	0.501799	1	0.929747	0.0506434	0.194875	0.152213
GOBP_CELLULAR_RESPONSE_TO_OXIDISED_LOW_DENSITY_LIPOPROTEIN_PARTICLE_STIMULUS	1	1	1	0.109375	0.322073	0.251565
GOBP_CELLULAR_RESPONSE_TO_OXYGEN_LEVELS	0.281551	0.955969	0.888809	0.032339	0.151831	0.118592
GOBP_CELLULAR_RESPONSE_TO_OXYGEN_RADICAL	1	1	1	0.0387924	0.168743	0.131802
GOBP_CELLULAR_RESPONSE_TO_PEPTIDE	0.316863	0.997008	0.926964	0.121863	0.35073	0.273949
GOBP_CELLULAR_RESPONSE_TO_PEPTIDE_HORMONE_STIMULUS	0.419233	0.997008	0.926964	0.33677	0.624084	0.48746
GOBP_CELLULAR_RESPONSE_TO_PH	1	1	1	0.31963	0.599592	0.468331
GOBP_CELLULAR_RESPONSE_TO_POTASSIUM_ION	1	1	1	1	1	1
GOBP_CELLULAR_RESPONSE_TO_PROSTAGLANDIN_E_STIMULUS	0.481189	1	0.929747	0.552318	0.747036	0.583496
GOBP_CELLULAR_RESPONSE_TO_PROSTAGLANDIN_STIMULUS	0.583171	1	0.929747	0.280381	0.5508	0.43022
GOBP_CELLULAR_RESPONSE_TO_PURINE_CONTAINING_COMPOUND	1	1	1	0.144989	0.379592	0.296492
GOBP_CELLULAR_RESPONSE_TO_RADIATION	0.191904	0.803931	0.747452	0.0403311	0.170838	0.133438
GOBP_CELLULAR_RESPONSE_TO_REACTIVE_NITROGEN_SPECIES	1	1	1	0.0556537	0.207504	0.162078
GOBP_CELLULAR_RESPONSE_TO_REACTIVE_OXYGEN_SPECIES	0.815561	1	0.929747	0.000634195	0.0108329	0.00846135
GOBP_CELLULAR_RESPONSE_TO_RETINOIC_ACID	0.939419	1	0.929747	0.240671	0.507533	0.396425
GOBP_CELLULAR_RESPONSE_TO_SALT_STRESS	0.38194	0.997008	0.926964	0.44528	0.703978	0.549865
GOBP_CELLULAR_RESPONSE_TO_STARVATION	0.0174415	0.229941	0.213787	0.0670196	0.238456	0.186253
GOBP_CELLULAR_RESPONSE_TO_STEROID_HORMONE_STIMULUS	0.935152	1	0.929747	0.478894	0.715245	0.558665
GOBP_CELLULAR_RESPONSE_TO_STEROL	1	1	1	0.127137	0.353327	0.275977
GOBP_CELLULAR_RESPONSE_TO_STEROL_DEPLETION	0.503407	1	0.929747	1	1	1
GOBP_CELLULAR_RESPONSE_TO_THYROID_HORMONE_STIMULUS	1	1	1	0.0476216	0.188069	0.146898
GOBP_CELLULAR_RESPONSE_TO_TOPOLOGICALLY_INCORRECT_PROTEIN	0.850565	1	0.929747	0.779088	0.887515	0.693222
GOBP_CELLULAR_RESPONSE_TO_TOXIC_SUBSTANCE	0.969284	1	0.929747	3.24424e-09	7.5735e-07	5.91552e-07
GOBP_CELLULAR_RESPONSE_TO_UV	0.324251	0.997008	0.926964	0.00199845	0.0247854	0.0193594
GOBP_CELLULAR_RESPONSE_TO_UV_A	1	1	1	0.000135398	0.00340685	0.00266103
GOBP_CELLULAR_RESPONSE_TO_VASCULAR_ENDOTHELIAL_GROWTH_FACTOR_STIMULUS	1	1	1	0.0122488	0.0822549	0.0642478
GOBP_CELLULAR_RESPONSE_TO_VIRUS	0.807191	1	0.929747	0.157334	0.40263	0.314487
GOBP_CELLULAR_RESPONSE_TO_VITAMIN	0.730986	1	0.929747	0.0183484	0.10433	0.0814903
GOBP_CELLULAR_RESPONSE_TO_VITAMIN_D	0.618117	1	0.929747	0.104267	0.314298	0.245492
GOBP_CELLULAR_RESPONSE_TO_X_RAY	0.408402	0.997008	0.926964	0.126883	0.353327	0.275977
GOBP_CELLULAR_RESPONSE_TO_ZINC_ION	1	1	1	1	1	1
GOBP_CELLULAR_SENESCENCE	0.122035	0.648614	0.603046	0.595702	0.775573	0.605786
GOBP_CELLULAR_SODIUM_ION_HOMEOSTASIS	1	1	1	0.0734862	0.253313	0.197859
GOBP_CELLULAR_TRANSITION_METAL_ION_HOMEOSTASIS	0.241393	0.88433	0.822203	0.584068	0.772252	0.603192
GOBP_CENTRAL_NERVOUS_SYSTEM_NEURON_AXONOGENESIS	0.187572	0.800615	0.744369	0.274723	0.545695	0.426232
GOBP_CENTRAL_NERVOUS_SYSTEM_NEURON_DEVELOPMENT	0.458386	0.997008	0.926964	0.61556	0.790122	0.61715
GOBP_CENTRAL_NERVOUS_SYSTEM_NEURON_DIFFERENTIATION	0.778396	1	0.929747	0.716066	0.849735	0.663712
GOBP_CENTRAL_NERVOUS_SYSTEM_PROJECTION_NEURON_AXONOGENESIS	0.679476	1	0.929747	0.151597	0.392007	0.306189
GOBP_CENTRIOLE_ASSEMBLY	0.860589	1	0.929747	1	1	1
GOBP_CENTRIOLE_CENTRIOLE_COHESION	0.457979	0.997008	0.926964	1	1	1
GOBP_CENTROMERE_COMPLEX_ASSEMBLY	0.697829	1	0.929747	0.950407	0.984375	0.768877
GOBP_CENTROMERIC_SISTER_CHROMATID_COHESION	0.38194	0.997008	0.926964	1	1	1
GOBP_CENTROSOME_DUPLICATION	0.95736	1	0.929747	0.979015	1	0.781082
GOBP_CENTROSOME_SEPARATION	0.481189	1	0.929747	1	1	1
GOBP_CERAMIDE_BIOSYNTHETIC_PROCESS	0.794077	1	0.929747	0.69561	0.834652	0.651932
GOBP_CERAMIDE_CATABOLIC_PROCESS	0.0584931	0.468917	0.435974	0.675456	0.823401	0.643143
GOBP_CERAMIDE_METABOLIC_PROCESS	0.443673	0.997008	0.926964	0.441443	0.703978	0.549865
GOBP_CERAMIDE_TRANSPORT	1	1	1	0.527668	0.738348	0.57671
GOBP_CEREBELLAR_CORTEX_DEVELOPMENT	1	1	1	0.905523	0.956994	0.74749
GOBP_CEREBELLAR_CORTEX_FORMATION	1	1	1	1	1	1
GOBP_CEREBELLAR_CORTEX_MORPHOGENESIS	1	1	1	0.820097	0.909722	0.710567
GOBP_CEREBELLAR_GRANULAR_LAYER_DEVELOPMENT	1	1	1	0.474225	0.709902	0.554491
GOBP_CEREBELLAR_PURKINJE_CELL_DIFFERENTIATION	1	1	1	1	1	1
GOBP_CEREBELLAR_PURKINJE_CELL_LAYER_DEVELOPMENT	1	1	1	1	1	1
GOBP_CEREBELLAR_PURKINJE_CELL_LAYER_FORMATION	1	1	1	1	1	1
GOBP_CEREBELLAR_PURKINJE_CELL_LAYER_MORPHOGENESIS	1	1	1	1	1	1
GOBP_CEREBRAL_CORTEX_CELL_MIGRATION	0.501799	1	0.929747	0.876434	0.942369	0.736067
GOBP_CEREBRAL_CORTEX_DEVELOPMENT	0.174391	0.783826	0.72876	0.922552	0.966849	0.755188
GOBP_CEREBRAL_CORTEX_NEURON_DIFFERENTIATION	0.583171	1	0.929747	1	1	1
GOBP_CEREBRAL_CORTEX_RADIALLY_ORIENTED_CELL_MIGRATION	0.718941	1	0.929747	0.788681	0.891504	0.696337
GOBP_CEREBROSPINAL_FLUID_CIRCULATION	1	1	1	1	1	1
GOBP_CGMP_BIOSYNTHETIC_PROCESS	1	1	1	1	1	1
GOBP_CGMP_MEDIATED_SIGNALING	1	1	1	0.0619321	0.22551	0.176142
GOBP_CGMP_METABOLIC_PROCESS	1	1	1	0.59783	0.775573	0.605786
GOBP_CHAPERONE_COFACTOR_DEPENDENT_PROTEIN_REFOLDING	0.430435	0.997008	0.926964	0.260377	0.527103	0.411711
GOBP_CHAPERONE_MEDIATED_AUTOPHAGY	1	1	1	0.201841	0.458451	0.358088
GOBP_CHAPERONE_MEDIATED_PROTEIN_COMPLEX_ASSEMBLY	0.618117	1	0.929747	0.31963	0.599592	0.468331
GOBP_CHAPERONE_MEDIATED_PROTEIN_FOLDING	0.757796	1	0.929747	0.109453	0.322073	0.251565
GOBP_CHAPERONE_MEDIATED_PROTEIN_TRANSPORT	1	1	1	0.44528	0.703978	0.549865
GOBP_CHEMICAL_HOMEOSTASIS_WITHIN_A_TISSUE	1	1	1	0.501661	0.725028	0.566306
GOBP_CHEMICAL_SYNAPTIC_TRANSMISSION_POSTSYNAPTIC	0.942788	1	0.929747	0.996448	1	0.781082
GOBP_CHEMOKINE_C_X_C_MOTIF_LIGAND_2_PRODUCTION	1	1	1	0.221332	0.477432	0.372914
GOBP_CHEMOKINE_PRODUCTION	0.778389	1	0.929747	0.0104521	0.0739858	0.0577889
GOBP_CHEMOSENSORY_BEHAVIOR	1	1	1	1	1	1
GOBP_CHLORIDE_TRANSPORT	0.950502	1	0.929747	0.0582014	0.215284	0.168154
GOBP_CHOLESTEROL_CATABOLIC_PROCESS	1	1	1	0.00180514	0.0231963	0.0181182
GOBP_CHOLESTEROL_EFFLUX	0.939419	1	0.929747	0.240671	0.507533	0.396425
GOBP_CHOLESTEROL_STORAGE	1	1	1	0.00306872	0.0322369	0.0251796
GOBP_CHONDROCYTE_DEVELOPMENT	1	1	1	0.00277473	0.0303631	0.0237161
GOBP_CHONDROCYTE_DIFFERENTIATION	1	1	1	7.32308e-05	0.00212218	0.00165759
GOBP_CHONDROCYTE_DIFFERENTIATION_INVOLVED_IN_ENDOCHONDRAL_BONE_MORPHOGENESIS	1	1	1	0.0334298	0.153688	0.120043
GOBP_CHONDROCYTE_PROLIFERATION	1	1	1	0.280381	0.5508	0.43022
GOBP_CHONDROITIN_SULFATE_BIOSYNTHETIC_PROCESS	1	1	1	0.0387924	0.168743	0.131802
GOBP_CHONDROITIN_SULFATE_CATABOLIC_PROCESS	1	1	1	0.0334298	0.153688	0.120043
GOBP_CHONDROITIN_SULFATE_PROTEOGLYCAN_BIOSYNTHETIC_PROCESS	1	1	1	0.0686373	0.240345	0.187729
GOBP_CHONDROITIN_SULFATE_PROTEOGLYCAN_METABOLIC_PROCESS	1	1	1	0.184683	0.432333	0.337687
GOBP_CHROMATIN_ASSEMBLY_OR_DISASSEMBLY	0.238663	0.88433	0.822203	0.997348	1	0.781082
GOBP_CHROMATIN_DISASSEMBLY	0.0517263	0.427883	0.397823	0.657579	0.814368	0.636088
GOBP_CHROMATIN_MEDIATED_MAINTENANCE_OF_TRANSCRIPTION	1	1	1	0.474225	0.709902	0.554491
GOBP_CHROMATIN_ORGANIZATION_INVOLVED_IN_REGULATION_OF_TRANSCRIPTION	0.489883	1	0.929747	0.997589	1	0.781082
GOBP_CHROMATIN_REMODELING	0.185922	0.800615	0.744369	0.999837	1	0.781082
GOBP_CHROMATIN_REMODELING_AT_CENTROMERE	0.603271	1	0.929747	0.919579	0.964571	0.753409
GOBP_CHROMATIN_SILENCING	0.847412	1	0.929747	0.983963	1	0.781082
GOBP_CHROMATIN_SILENCING_AT_TELOMERE	1	1	1	0.44528	0.703978	0.549865
GOBP_CHROMOSOME_CONDENSATION	0.591486	1	0.929747	0.699819	0.838266	0.654754
GOBP_CHROMOSOME_LOCALIZATION	0.0581036	0.468917	0.435974	0.61556	0.790122	0.61715
GOBP_CHROMOSOME_ORGANIZATION_INVOLVED_IN_MEIOTIC_CELL_CYCLE	1	1	1	0.971025	0.996714	0.778515
GOBP_CHROMOSOME_SEGREGATION	0.0104594	0.164955	0.153366	0.99704	1	0.781082
GOBP_CHROMOSOME_SEPARATION	0.112394	0.63393	0.589394	0.961923	0.990617	0.773753
GOBP_CHRONIC_INFLAMMATORY_RESPONSE	1	1	1	0.00240353	0.0282903	0.022097
GOBP_CHYLOMICRON_ASSEMBLY	1	1	1	0.44528	0.703978	0.549865
GOBP_CILIARY_BASAL_BODY_PLASMA_MEMBRANE_DOCKING	0.22136	0.859713	0.799315	0.736665	0.863459	0.674432
GOBP_CILIUM_MOVEMENT	1	1	1	1	1	1
GOBP_CILIUM_OR_FLAGELLUM_DEPENDENT_CELL_MOTILITY	1	1	1	1	1	1
GOBP_CILIUM_ORGANIZATION	0.936658	1	0.929747	0.999779	1	0.781082
GOBP_CIRCADIAN_REGULATION_OF_GENE_EXPRESSION	0.322183	0.997008	0.926964	0.685948	0.831751	0.649665
GOBP_CIRCADIAN_RHYTHM	0.807174	1	0.929747	0.930101	0.970279	0.757867
GOBP_CIRCADIAN_SLEEP_WAKE_CYCLE	1	1	1	1	1	1
GOBP_CIRCADIAN_SLEEP_WAKE_CYCLE_SLEEP	1	1	1	1	1	1
GOBP_CLATHRIN_COAT_ASSEMBLY	0.545031	1	0.929747	0.618822	0.790122	0.61715
GOBP_CLATHRIN_DEPENDENT_ENDOCYTOSIS	0.591486	1	0.929747	0.915143	0.96341	0.752502
GOBP_CLEAVAGE_INVOLVED_IN_RRNA_PROCESSING	0.000823355	0.0245914	0.0228637	1	1	1
GOBP_COAGULATION	0.727252	1	0.929747	1.29514e-05	0.000523287	0.00040873
GOBP_COBALAMIN_METABOLIC_PROCESS	1	1	1	1	1	1
GOBP_COCHLEA_DEVELOPMENT	0.860589	1	0.929747	0.418815	0.693131	0.541392
GOBP_COCHLEA_MORPHOGENESIS	1	1	1	0.31963	0.599592	0.468331
GOBP_COENZYME_A_BIOSYNTHETIC_PROCESS	0.0655123	0.494829	0.460066	1	1	1
GOBP_COENZYME_A_METABOLIC_PROCESS	0.133039	0.673171	0.625878	1	1	1
GOBP_COGNITION	0.0849907	0.564653	0.524984	0.367743	0.662631	0.517569
GOBP_COLLAGEN_ACTIVATED_SIGNALING_PATHWAY	1	1	1	0.552318	0.747036	0.583496
GOBP_COLLAGEN_ACTIVATED_TYROSINE_KINASE_RECEPTOR_SIGNALING_PATHWAY	1	1	1	1	1	1
GOBP_COLLAGEN_BIOSYNTHETIC_PROCESS	1	1	1	0.125519	0.353327	0.275977
GOBP_COLLAGEN_CATABOLIC_PROCESS	1	1	1	3.61981e-06	0.000189425	0.000147956
GOBP_COLLAGEN_FIBRIL_ORGANIZATION	0.906051	1	0.929747	8.55532e-09	1.79747e-06	1.40397e-06
GOBP_COLLAGEN_METABOLIC_PROCESS	1	1	1	1.28832e-05	0.000523287	0.00040873
GOBP_COLLATERAL_SPROUTING	0.634477	1	0.929747	0.70846	0.842136	0.657777
GOBP_COLLECTING_DUCT_DEVELOPMENT	1	1	1	1	1	1
GOBP_COLUMNAR_CUBOIDAL_EPITHELIAL_CELL_DEVELOPMENT	0.81865	1	0.929747	0.876434	0.942369	0.736067
GOBP_COLUMNAR_CUBOIDAL_EPITHELIAL_CELL_DIFFERENTIATION	0.687446	1	0.929747	0.80797	0.90542	0.707207
GOBP_COMMISSURAL_NEURON_AXON_GUIDANCE	1	1	1	0.0218311	0.114668	0.0895649
GOBP_COMPLEMENT_ACTIVATION	0.995246	1	0.929747	0.886866	0.94873	0.741036
GOBP_COMPLEMENT_ACTIVATION_ALTERNATIVE_PATHWAY	0.545031	1	0.929747	0.240963	0.507533	0.396425
GOBP_COMPLEMENT_ACTIVATION_LECTIN_PATHWAY	1	1	1	1	1	1
GOBP_COMPLEMENT_DEPENDENT_CYTOTOXICITY	1	1	1	0.414743	0.689139	0.538274
GOBP_COMPLEMENT_RECEPTOR_MEDIATED_SIGNALING_PATHWAY	1	1	1	0.501661	0.725028	0.566306
GOBP_CONNECTIVE_TISSUE_DEVELOPMENT	0.999718	1	0.929747	9.74339e-06	0.000417773	0.000326315
GOBP_CONNECTIVE_TISSUE_REPLACEMENT	1	1	1	0.657579	0.814368	0.636088
GOBP_CONVERGENT_EXTENSION	1	1	1	0.0010287	0.015605	0.0121888
GOBP_COPII_COATED_VESICLE_BUDDING	0.0919568	0.57473	0.534353	0.899905	0.953886	0.745063
GOBP_COPII_COATED_VESICLE_CARGO_LOADING	0.481189	1	0.929747	0.552318	0.747036	0.583496
GOBP_COPPER_ION_HOMEOSTASIS	0.0338988	0.329671	0.30651	1	1	1
GOBP_COPPER_ION_TRANSPORT	1	1	1	0.575683	0.76527	0.597739
GOBP_COPULATION	1	1	1	0.260667	0.527103	0.411711
GOBP_CORNEA_DEVELOPMENT_IN_CAMERA_TYPE_EYE	1	1	1	1	1	1
GOBP_CORNIFICATION	0.992968	1	0.929747	0.938504	0.975428	0.761889
GOBP_CORONARY_VASCULATURE_DEVELOPMENT	0.117908	0.63393	0.589394	0.676239	0.823401	0.643143
GOBP_CORONARY_VASCULATURE_MORPHOGENESIS	0.503407	1	0.929747	0.201841	0.458451	0.358088
GOBP_CORPUS_CALLOSUM_DEVELOPMENT	0.481189	1	0.929747	0.552318	0.747036	0.583496
GOBP_CORTICAL_ACTIN_CYTOSKELETON_ORGANIZATION	1	1	1	0.000641337	0.0108665	0.00848764
GOBP_CORTICAL_CYTOSKELETON_ORGANIZATION	0.716118	1	0.929747	0.000174593	0.00414486	0.00323747
GOBP_CORTICOSTEROID_HORMONE_SECRETION	1	1	1	1	1	1
GOBP_CORTICOSTEROID_RECEPTOR_SIGNALING_PATHWAY	1	1	1	0.527668	0.738348	0.57671
GOBP_CORTISOL_METABOLIC_PROCESS	1	1	1	1	1	1
GOBP_COTRANSLATIONAL_PROTEIN_TARGETING_TO_MEMBRANE	1.1396e-10	1.92307e-08	1.78797e-08	1	1	1
GOBP_COVALENT_CHROMATIN_MODIFICATION	0.00893084	0.148481	0.138049	0.971096	0.996714	0.778515
GOBP_CRANIAL_NERVE_DEVELOPMENT	1	1	1	0.688212	0.831751	0.649665
GOBP_CRANIAL_NERVE_MORPHOGENESIS	1	1	1	0.396213	0.689139	0.538274
GOBP_CRANIAL_SKELETAL_SYSTEM_DEVELOPMENT	1	1	1	0.441772	0.703978	0.549865
GOBP_CRANIOFACIAL_SUTURE_MORPHOGENESIS	1	1	1	0.0556537	0.207504	0.162078
GOBP_CRISTAE_FORMATION	0.445153	0.997008	0.926964	1	1	1
GOBP_CYCLIC_NUCLEOTIDE_BIOSYNTHETIC_PROCESS	1	1	1	1	1	1
GOBP_CYCLIC_NUCLEOTIDE_CATABOLIC_PROCESS	1	1	1	0.527668	0.738348	0.57671
GOBP_CYCLIC_NUCLEOTIDE_MEDIATED_SIGNALING	0.895409	1	0.929747	0.0396625	0.170487	0.133165
GOBP_CYCLIC_NUCLEOTIDE_METABOLIC_PROCESS	1	1	1	0.882892	0.945924	0.738844
GOBP_CYCLOOXYGENASE_PATHWAY	1	1	1	0.00180514	0.0231963	0.0181182
GOBP_CYSTEINE_METABOLIC_PROCESS	1	1	1	0.474225	0.709902	0.554491
GOBP_CYTIDINE_TO_URIDINE_EDITING	1	1	1	0.474225	0.709902	0.554491
GOBP_CYTOCHROME_COMPLEX_ASSEMBLY	0.0664171	0.494829	0.460066	0.854848	0.93111	0.727273
GOBP_CYTOKINE_PRODUCTION_INVOLVED_IN_IMMUNE_RESPONSE	1	1	1	0.0532769	0.204074	0.159399
GOBP_CYTOKINE_PRODUCTION_INVOLVED_IN_INFLAMMATORY_RESPONSE	1	1	1	0.149997	0.39124	0.30559
GOBP_CYTOKINESIS	0.063758	0.494829	0.460066	0.794165	0.896374	0.700141
GOBP_CYTOKINETIC_PROCESS	0.221048	0.859491	0.799109	0.596452	0.775573	0.605786
GOBP_CYTOLYSIS	0.385092	0.997008	0.926964	0.020964	0.113863	0.088936
GOBP_CYTOPLASM_ORGANIZATION	0.38194	0.997008	0.926964	1	1	1
GOBP_CYTOPLASMIC_MICROTUBULE_ORGANIZATION	0.498562	1	0.929747	1	1	1
GOBP_CYTOPLASMIC_PATTERN_RECOGNITION_RECEPTOR_SIGNALING_PATHWAY	0.37123	0.997008	0.926964	0.895539	0.951468	0.743174
GOBP_CYTOPLASMIC_PATTERN_RECOGNITION_RECEPTOR_SIGNALING_PATHWAY_IN_RESPONSE_TO_VIRUS	0.753552	1	0.929747	0.502792	0.725028	0.566306
GOBP_CYTOPLASMIC_SEQUESTERING_OF_PROTEIN	0.618117	1	0.929747	0.31963	0.599592	0.468331
GOBP_CYTOPLASMIC_SEQUESTERING_OF_TRANSCRIPTION_FACTOR	0.481189	1	0.929747	0.552318	0.747036	0.583496
GOBP_CYTOPLASMIC_TRANSLATION	1.69462e-09	2.28773e-07	2.12701e-07	0.972256	0.997173	0.778874
GOBP_CYTOPLASMIC_TRANSLATIONAL_ELONGATION	0.0778596	0.535543	0.497919	1	1	1
GOBP_CYTOPLASMIC_TRANSLATIONAL_INITIATION	0.000499635	0.016532	0.0153706	1	1	1
GOBP_CYTOSKELETON_DEPENDENT_CYTOKINESIS	0.409736	0.997008	0.926964	0.40393	0.689139	0.538274
GOBP_CYTOSKELETON_DEPENDENT_INTRACELLULAR_TRANSPORT	0.214681	0.847426	0.787891	0.944663	0.98024	0.765647
GOBP_CYTOSOLIC_CALCIUM_ION_TRANSPORT	0.995602	1	0.929747	0.00409257	0.0389072	0.0303897
GOBP_CYTOSOLIC_TRANSPORT	0.174756	0.783826	0.72876	0.869804	0.940292	0.734445
GOBP_DE_NOVO_PROTEIN_FOLDING	0.554578	1	0.929747	0.184683	0.432333	0.337687
GOBP_DEADENYLATION_DEPENDENT_DECAPPING_OF_NUCLEAR_TRANSCRIBED_MRNA	0.00747128	0.134125	0.124703	1	1	1
GOBP_DECIDUALIZATION	1	1	1	0.0832367	0.274753	0.214605
GOBP_DEDIFFERENTIATION	1	1	1	1	1	1
GOBP_DEFENSE_RESPONSE_TO_BACTERIUM	0.990706	1	0.929747	0.396393	0.689139	0.538274
GOBP_DEFENSE_RESPONSE_TO_FUNGUS	1	1	1	0.33264	0.619571	0.483936
GOBP_DEFENSE_RESPONSE_TO_GRAM_NEGATIVE_BACTERIUM	0.883933	1	0.929747	0.826894	0.914839	0.714564
GOBP_DEFENSE_RESPONSE_TO_GRAM_POSITIVE_BACTERIUM	0.608785	1	0.929747	0.25011	0.521539	0.407364
GOBP_DEFENSE_RESPONSE_TO_VIRUS	0.436016	0.997008	0.926964	0.000521542	0.00940567	0.00734659
GOBP_DEFINITIVE_HEMOPOIESIS	1	1	1	0.260667	0.527103	0.411711
GOBP_DEMETHYLATION	0.600271	1	0.929747	1	1	1
GOBP_DENDRITE_DEVELOPMENT	0.130184	0.673171	0.625878	0.240882	0.507533	0.396425
GOBP_DENDRITE_EXTENSION	1	1	1	1	1	1
GOBP_DENDRITE_MORPHOGENESIS	0.0162408	0.217511	0.20223	0.300634	0.576832	0.450553
GOBP_DENDRITE_SELF_AVOIDANCE	0.524674	1	0.929747	0.0556537	0.207504	0.162078
GOBP_DENDRITIC_CELL_ANTIGEN_PROCESSING_AND_PRESENTATION	1	1	1	0.0402077	0.170487	0.133165
GOBP_DENDRITIC_CELL_APOPTOTIC_PROCESS	1	1	1	0.0170225	0.0990699	0.0773817
GOBP_DENDRITIC_CELL_CHEMOTAXIS	1	1	1	0.358339	0.65071	0.508257
GOBP_DENDRITIC_CELL_CYTOKINE_PRODUCTION	1	1	1	0.144989	0.379592	0.296492
GOBP_DENDRITIC_CELL_DIFFERENTIATION	0.326321	0.997008	0.926964	0.228609	0.491614	0.38399
GOBP_DENDRITIC_CELL_MIGRATION	0.718941	1	0.929747	0.190718	0.443495	0.346406
GOBP_DENDRITIC_SPINE_DEVELOPMENT	0.0587884	0.46944	0.43646	0.25011	0.521539	0.407364
GOBP_DENDRITIC_SPINE_MAINTENANCE	0.0517263	0.427883	0.397823	0.280381	0.5508	0.43022
GOBP_DENDRITIC_SPINE_MORPHOGENESIS	0.0426136	0.385578	0.35849	0.202384	0.458941	0.35847
GOBP_DENSE_CORE_GRANULE_TRANSPORT	1	1	1	1	1	1
GOBP_DENTATE_GYRUS_DEVELOPMENT	0.457979	0.997008	0.926964	1	1	1
GOBP_DEOXYRIBONUCLEOSIDE_MONOPHOSPHATE_METABOLIC_PROCESS	0.524674	1	0.929747	0.0101382	0.0724503	0.0565896
GOBP_DEOXYRIBONUCLEOSIDE_TRIPHOSPHATE_METABOLIC_PROCESS	0.503407	1	0.929747	0.201841	0.458451	0.358088
GOBP_DEOXYRIBONUCLEOTIDE_BIOSYNTHETIC_PROCESS	0.481189	1	0.929747	0.0402077	0.170487	0.133165
GOBP_DEOXYRIBONUCLEOTIDE_METABOLIC_PROCESS	0.243984	0.886378	0.824107	0.000919641	0.0143123	0.0111791
GOBP_DEOXYRIBOSE_PHOSPHATE_BIOSYNTHETIC_PROCESS	0.408402	0.997008	0.926964	0.474225	0.709902	0.554491
GOBP_DEOXYRIBOSE_PHOSPHATE_CATABOLIC_PROCESS	0.106855	0.621785	0.578103	0.0118173	0.0800905	0.0625573
GOBP_DEPHOSPHORYLATION	0.782759	1	0.929747	0.156624	0.401491	0.313597
GOBP_DERMATAN_SULFATE_METABOLIC_PROCESS	1	1	1	0.00359712	0.0356488	0.0278446
GOBP_DERMATAN_SULFATE_PROTEOGLYCAN_METABOLIC_PROCESS	1	1	1	0.00808104	0.0617391	0.0482233
GOBP_DESMOSOME_ORGANIZATION	1	1	1	1	1	1
GOBP_DETECTION_OF_ABIOTIC_STIMULUS	0.869288	1	0.929747	0.876356	0.942369	0.736067
GOBP_DETECTION_OF_BIOTIC_STIMULUS	1	1	1	0.116076	0.335686	0.262198
GOBP_DETECTION_OF_CALCIUM_ION	1	1	1	0.501661	0.725028	0.566306
GOBP_DETECTION_OF_CHEMICAL_STIMULUS_INVOLVED_IN_SENSORY_PERCEPTION_OF_TASTE	1	1	1	0.651172	0.814111	0.635887
GOBP_DETECTION_OF_EXTERNAL_BIOTIC_STIMULUS	1	1	1	0.358339	0.65071	0.508257
GOBP_DETECTION_OF_LIGHT_STIMULUS	0.410312	0.997008	0.926964	0.983077	1	0.781082
GOBP_DETECTION_OF_LIGHT_STIMULUS_INVOLVED_IN_SENSORY_PERCEPTION	1	1	1	0.675456	0.823401	0.643143
GOBP_DETECTION_OF_MECHANICAL_STIMULUS	1	1	1	0.47422	0.709902	0.554491
GOBP_DETECTION_OF_MECHANICAL_STIMULUS_INVOLVED_IN_SENSORY_PERCEPTION	1	1	1	0.232019	0.495398	0.386946
GOBP_DETECTION_OF_MECHANICAL_STIMULUS_INVOLVED_IN_SENSORY_PERCEPTION_OF_PAIN	1	1	1	0.527668	0.738348	0.57671
GOBP_DETECTION_OF_MECHANICAL_STIMULUS_INVOLVED_IN_SENSORY_PERCEPTION_OF_SOUND	1	1	1	0.527668	0.738348	0.57671
GOBP_DETECTION_OF_MOLECULE_OF_BACTERIAL_ORIGIN	1	1	1	0.126883	0.353327	0.275977
GOBP_DETECTION_OF_OTHER_ORGANISM	1	1	1	0.63872	0.800837	0.625519
GOBP_DETECTION_OF_STIMULUS_INVOLVED_IN_SENSORY_PERCEPTION_OF_PAIN	1	1	1	0.358339	0.65071	0.508257
GOBP_DETECTION_OF_TEMPERATURE_STIMULUS	1	1	1	0.300052	0.575979	0.449887
GOBP_DETECTION_OF_TEMPERATURE_STIMULUS_INVOLVED_IN_SENSORY_PERCEPTION	1	1	1	0.221332	0.477432	0.372914
GOBP_DETERMINATION_OF_ADULT_LIFESPAN	1	1	1	0.240963	0.507533	0.396425
GOBP_DETOXIFICATION	0.983123	1	0.929747	1.01926e-08	1.91757e-06	1.49778e-06
GOBP_DETOXIFICATION_OF_INORGANIC_COMPOUND	1	1	1	1	1	1
GOBP_DEVELOPMENT_OF_PRIMARY_FEMALE_SEXUAL_CHARACTERISTICS	0.4012	0.997008	0.926964	0.242174	0.509316	0.397817
GOBP_DEVELOPMENT_OF_PRIMARY_SEXUAL_CHARACTERISTICS	0.90684	1	0.929747	0.243255	0.511334	0.399394
GOBP_DEVELOPMENTAL_CELL_GROWTH	0.738503	1	0.929747	0.18432	0.432333	0.337687
GOBP_DEVELOPMENTAL_GROWTH_INVOLVED_IN_MORPHOGENESIS	0.851937	1	0.929747	0.0805063	0.27063	0.211384
GOBP_DEVELOPMENTAL_INDUCTION	1	1	1	0.502792	0.725028	0.566306
GOBP_DEVELOPMENTAL_MATURATION	0.974175	1	0.929747	0.530776	0.742204	0.579722
GOBP_DEVELOPMENTAL_PIGMENTATION	0.854342	1	0.929747	0.404647	0.689139	0.538274
GOBP_DIACYLGLYCEROL_METABOLIC_PROCESS	1	1	1	0.377396	0.671104	0.524187
GOBP_DICARBOXYLIC_ACID_BIOSYNTHETIC_PROCESS	1	1	1	0.163583	0.404082	0.315621
GOBP_DICARBOXYLIC_ACID_CATABOLIC_PROCESS	1	1	1	0.0556537	0.207504	0.162078
GOBP_DICARBOXYLIC_ACID_METABOLIC_PROCESS	0.784388	1	0.929747	0.00416086	0.0391458	0.0305761
GOBP_DICARBOXYLIC_ACID_TRANSPORT	0.103393	0.615156	0.571939	0.211296	0.472772	0.369273
GOBP_DIENCEPHALON_DEVELOPMENT	0.813465	1	0.929747	0.723241	0.853471	0.66663
GOBP_DIET_INDUCED_THERMOGENESIS	1	1	1	0.414743	0.689139	0.538274
GOBP_DIGESTION	0.997662	1	0.929747	0.00225413	0.0270542	0.0211315
GOBP_DIGESTIVE_SYSTEM_DEVELOPMENT	0.980377	1	0.929747	0.265183	0.533668	0.416838
GOBP_DIGESTIVE_SYSTEM_PROCESS	0.986982	1	0.929747	0.000181549	0.00426523	0.00333149
GOBP_DIGESTIVE_TRACT_MORPHOGENESIS	1	1	1	0.195401	0.45195	0.35301
GOBP_DIOL_BIOSYNTHETIC_PROCESS	0.24211	0.88433	0.822203	1	1	1
GOBP_DIOL_METABOLIC_PROCESS	0.354005	0.997008	0.926964	0.788681	0.891504	0.696337
GOBP_DISACCHARIDE_METABOLIC_PROCESS	0.38194	0.997008	0.926964	0.44528	0.703978	0.549865
GOBP_DISTAL_TUBULE_DEVELOPMENT	1	1	1	1	1	1
GOBP_DIVALENT_INORGANIC_CATION_HOMEOSTASIS	0.999937	1	0.929747	0.0675149	0.239004	0.186681
GOBP_DNA_BIOSYNTHETIC_PROCESS	0.563174	1	0.929747	0.398288	0.689139	0.538274
GOBP_DNA_CATABOLIC_PROCESS	0.826427	1	0.929747	0.347141	0.636426	0.4971
GOBP_DNA_CATABOLIC_PROCESS_ENDONUCLEOLYTIC	0.742516	1	0.929747	0.218059	0.477432	0.372914
GOBP_DNA_CONFORMATION_CHANGE	0.648849	1	0.929747	0.998253	1	0.781082
GOBP_DNA_CYTOSINE_DEAMINATION	1	1	1	1	1	1
GOBP_DNA_DAMAGE_RESPONSE_DETECTION_OF_DNA_DAMAGE	0.232465	0.875634	0.814118	1	1	1
GOBP_DNA_DAMAGE_RESPONSE_SIGNAL_TRANSDUCTION_BY_P53_CLASS_MEDIATOR	0.301095	0.987399	0.918031	0.316005	0.599211	0.468033
GOBP_DNA_DAMAGE_RESPONSE_SIGNAL_TRANSDUCTION_RESULTING_IN_TRANSCRIPTION	1	1	1	0.0125064	0.0827588	0.0646414
GOBP_DNA_DEALKYLATION	0.430435	0.997008	0.926964	0.838403	0.92176	0.71997
GOBP_DNA_DEALKYLATION_INVOLVED_IN_DNA_REPAIR	0.354297	0.997008	0.926964	0.414743	0.689139	0.538274
GOBP_DNA_DEAMINATION	0.118521	0.63393	0.589394	1	1	1
GOBP_DNA_DEMETHYLATION	0.706357	1	0.929747	1	1	1
GOBP_DNA_DEPENDENT_DNA_REPLICATION	0.358138	0.997008	0.926964	0.917252	0.964571	0.753409
GOBP_DNA_DEPENDENT_DNA_REPLICATION_MAINTENANCE_OF_FIDELITY	0.350008	0.997008	0.926964	0.927769	0.969049	0.756907
GOBP_DNA_DOUBLE_STRAND_BREAK_PROCESSING	0.665127	1	0.929747	1	1	1
GOBP_DNA_GEOMETRIC_CHANGE	0.541755	1	0.929747	0.851811	0.930657	0.726919
GOBP_DNA_INTEGRATION	1	1	1	1	1	1
GOBP_DNA_INTEGRITY_CHECKPOINT	0.0166232	0.220879	0.205361	0.965378	0.993271	0.775826
GOBP_DNA_LIGATION	0.133039	0.673171	0.625878	0.552318	0.747036	0.583496
GOBP_DNA_METHYLATION	0.400578	0.997008	0.926964	0.908131	0.959027	0.749078
GOBP_DNA_METHYLATION_DEPENDENT_HETEROCHROMATIN_ASSEMBLY	0.210109	0.831817	0.773379	1	1	1
GOBP_DNA_METHYLATION_INVOLVED_IN_GAMETE_GENERATION	1	1	1	1	1	1
GOBP_DNA_METHYLATION_OR_DEMETHYLATION	0.418255	0.997008	0.926964	0.96821	0.995209	0.77734
GOBP_DNA_MODIFICATION	0.0347897	0.332621	0.309253	0.988448	1	0.781082
GOBP_DNA_PACKAGING	0.810762	1	0.929747	0.9957	1	0.781082
GOBP_DNA_RECOMBINATION	0.491965	1	0.929747	0.972601	0.997284	0.77896
GOBP_DNA_REPLICATION	0.421691	0.997008	0.926964	0.706129	0.842136	0.657777
GOBP_DNA_REPLICATION_CHECKPOINT	0.524674	1	0.929747	1	1	1
GOBP_DNA_REPLICATION_DEPENDENT_NUCLEOSOME_ORGANIZATION	1	1	1	0.502792	0.725028	0.566306
GOBP_DNA_REPLICATION_INDEPENDENT_NUCLEOSOME_ORGANIZATION	0.678573	1	0.929747	0.780219	0.887515	0.693222
GOBP_DNA_REPLICATION_INITIATION	0.0903935	0.569996	0.529952	0.15379	0.395486	0.308907
GOBP_DNA_STRAND_ELONGATION	1	1	1	0.751787	0.869772	0.679363
GOBP_DNA_STRAND_ELONGATION_INVOLVED_IN_DNA_REPLICATION	1	1	1	0.63872	0.800837	0.625519
GOBP_DNA_SYNTHESIS_INVOLVED_IN_DNA_REPAIR	1	1	1	0.771316	0.88288	0.689601
GOBP_DNA_TEMPLATED_TRANSCRIPTION_ELONGATION	9.65424e-08	7.57746e-06	7.04511e-06	1	1	1
GOBP_DNA_TEMPLATED_TRANSCRIPTION_INITIATION	2.59008e-05	0.00126689	0.00117788	0.990939	1	0.781082
GOBP_DNA_TEMPLATED_TRANSCRIPTION_TERMINATION	0.00460881	0.0964302	0.0896556	0.908131	0.959027	0.749078
GOBP_DNA_UNWINDING_INVOLVED_IN_DNA_REPLICATION	0.503407	1	0.929747	0.201841	0.458451	0.358088
GOBP_DOPAMINE_BIOSYNTHETIC_PROCESS	1	1	1	1	1	1
GOBP_DOPAMINE_METABOLIC_PROCESS	1	1	1	0.0460464	0.185867	0.145177
GOBP_DOPAMINE_RECEPTOR_SIGNALING_PATHWAY	0.243984	0.886378	0.824107	0.882892	0.945924	0.738844
GOBP_DOPAMINE_SECRETION	0.764116	1	0.929747	0.246134	0.514555	0.401909
GOBP_DOPAMINE_TRANSPORT	0.872293	1	0.929747	0.446795	0.703978	0.549865
GOBP_DOPAMINERGIC_NEURON_DIFFERENTIATION	0.802038	1	0.929747	0.12509	0.353327	0.275977
GOBP_DORSAL_AORTA_DEVELOPMENT	0.0655123	0.494829	0.460066	1	1	1
GOBP_DORSAL_SPINAL_CORD_DEVELOPMENT	1	1	1	1	1	1
GOBP_DORSAL_VENTRAL_NEURAL_TUBE_PATTERNING	0.583171	1	0.929747	1	1	1
GOBP_DORSAL_VENTRAL_PATTERN_FORMATION	0.965766	1	0.929747	0.915721	0.96341	0.752502
GOBP_DOSAGE_COMPENSATION	0.178596	0.783826	0.72876	1	1	1
GOBP_DOUBLE_STRAND_BREAK_REPAIR	0.113149	0.63393	0.589394	0.89746	0.953268	0.74458
GOBP_DOUBLE_STRAND_BREAK_REPAIR_VIA_BREAK_INDUCED_REPLICATION	1	1	1	0.126883	0.353327	0.275977
GOBP_DRUG_CATABOLIC_PROCESS	0.665127	1	0.929747	1	1	1
GOBP_DRUG_METABOLIC_PROCESS	0.860589	1	0.929747	0.688212	0.831751	0.649665
GOBP_DRUG_TRANSMEMBRANE_TRANSPORT	1	1	1	0.414743	0.689139	0.538274
GOBP_DRUG_TRANSPORT	1	1	1	0.474225	0.709902	0.554491
GOBP_EAR_DEVELOPMENT	0.975575	1	0.929747	0.363389	0.656113	0.512478
GOBP_EAR_MORPHOGENESIS	0.991976	1	0.929747	0.350074	0.640685	0.500427
GOBP_EATING_BEHAVIOR	1	1	1	1	1	1
GOBP_ECTODERM_DEVELOPMENT	0.194271	0.803931	0.747452	0.63872	0.800837	0.625519
GOBP_ECTODERMAL_PLACODE_FORMATION	1	1	1	1	1	1
GOBP_ELASTIC_FIBER_ASSEMBLY	1	1	1	0.0128723	0.0834713	0.0651979
GOBP_ELECTRON_TRANSPORT_CHAIN	0.0209249	0.248667	0.231197	0.0239852	0.123361	0.0963548
GOBP_EMBRYO_IMPLANTATION	0.888035	1	0.929747	0.263088	0.530467	0.414338
GOBP_EMBRYONIC_APPENDAGE_MORPHOGENESIS	0.992652	1	0.929747	0.84211	0.924144	0.721832
GOBP_EMBRYONIC_AXIS_SPECIFICATION	1	1	1	1	1	1
GOBP_EMBRYONIC_BODY_MORPHOGENESIS	1	1	1	0.0170225	0.0990699	0.0773817
GOBP_EMBRYONIC_BRAIN_DEVELOPMENT	1	1	1	0.414743	0.689139	0.538274
GOBP_EMBRYONIC_CAMERA_TYPE_EYE_DEVELOPMENT	1	1	1	0.51935	0.738348	0.57671
GOBP_EMBRYONIC_CAMERA_TYPE_EYE_FORMATION	1	1	1	0.44528	0.703978	0.549865
GOBP_EMBRYONIC_CAMERA_TYPE_EYE_MORPHOGENESIS	1	1	1	0.723683	0.853471	0.66663
GOBP_EMBRYONIC_CRANIAL_SKELETON_MORPHOGENESIS	1	1	1	0.418815	0.693131	0.541392
GOBP_EMBRYONIC_DIGESTIVE_TRACT_DEVELOPMENT	0.742516	1	0.929747	1	1	1
GOBP_EMBRYONIC_DIGESTIVE_TRACT_MORPHOGENESIS	1	1	1	1	1	1
GOBP_EMBRYONIC_DIGIT_MORPHOGENESIS	1	1	1	0.752562	0.870188	0.679688
GOBP_EMBRYONIC_EYE_MORPHOGENESIS	1	1	1	0.232019	0.495398	0.386946
GOBP_EMBRYONIC_FORELIMB_MORPHOGENESIS	1	1	1	0.788681	0.891504	0.696337
GOBP_EMBRYONIC_HEART_TUBE_DEVELOPMENT	0.654397	1	0.929747	1	1	1
GOBP_EMBRYONIC_HEART_TUBE_MORPHOGENESIS	0.571206	1	0.929747	1	1	1
GOBP_EMBRYONIC_HEMOPOIESIS	0.634477	1	0.929747	1	1	1
GOBP_EMBRYONIC_HINDLIMB_MORPHOGENESIS	1	1	1	1	1	1
GOBP_EMBRYONIC_ORGAN_DEVELOPMENT	0.901504	1	0.929747	0.742574	0.865998	0.676415
GOBP_EMBRYONIC_ORGAN_MORPHOGENESIS	0.997909	1	0.929747	0.586974	0.775374	0.60563
GOBP_EMBRYONIC_PATTERN_SPECIFICATION	0.772928	1	0.929747	0.859673	0.934872	0.730212
GOBP_EMBRYONIC_PLACENTA_DEVELOPMENT	0.662888	1	0.929747	0.78733	0.891504	0.696337
GOBP_EMBRYONIC_PLACENTA_MORPHOGENESIS	1	1	1	0.723683	0.853471	0.66663
GOBP_EMBRYONIC_SKELETAL_JOINT_DEVELOPMENT	1	1	1	1	1	1
GOBP_EMBRYONIC_SKELETAL_JOINT_MORPHOGENESIS	1	1	1	1	1	1
GOBP_EMBRYONIC_SKELETAL_SYSTEM_DEVELOPMENT	1	1	1	0.266188	0.535222	0.418052
GOBP_EMBRYONIC_SKELETAL_SYSTEM_MORPHOGENESIS	1	1	1	0.507896	0.731886	0.571663
GOBP_EMBRYONIC_VISCEROCRANIUM_MORPHOGENESIS	1	1	1	0.414743	0.689139	0.538274
GOBP_ENAMEL_MINERALIZATION	1	1	1	1	1	1
GOBP_ENDOCARDIAL_CUSHION_DEVELOPMENT	0.840995	1	0.929747	0.651172	0.814111	0.635887
GOBP_ENDOCARDIAL_CUSHION_FORMATION	0.650137	1	0.929747	1	1	1
GOBP_ENDOCARDIAL_CUSHION_MORPHOGENESIS	0.764116	1	0.929747	0.829495	0.914839	0.714564
GOBP_ENDOCARDIUM_DEVELOPMENT	0.38194	0.997008	0.926964	1	1	1
GOBP_ENDOCHONDRAL_BONE_MORPHOGENESIS	1	1	1	0.0177033	0.101903	0.0795948
GOBP_ENDOCRINE_HORMONE_SECRETION	1	1	1	0.688212	0.831751	0.649665
GOBP_ENDOCRINE_PANCREAS_DEVELOPMENT	1	1	1	1	1	1
GOBP_ENDOCRINE_PROCESS	0.967237	1	0.929747	0.0499923	0.193632	0.151242
GOBP_ENDOCRINE_SYSTEM_DEVELOPMENT	0.77169	1	0.929747	0.956817	0.987403	0.771243
GOBP_ENDOCYTIC_RECYCLING	0.637075	1	0.929747	0.931546	0.971063	0.75848
GOBP_ENDODERM_DEVELOPMENT	0.842174	1	0.929747	0.00594752	0.0498832	0.0389628
GOBP_ENDODERM_FORMATION	0.668576	1	0.929747	0.000357034	0.00721278	0.00563377
GOBP_ENDODERMAL_CELL_DIFFERENTIATION	0.567139	1	0.929747	6.95291e-05	0.00204309	0.00159582
GOBP_ENDODERMAL_CELL_FATE_COMMITMENT	0.10444	0.615156	0.571939	1	1	1
GOBP_ENDOMEMBRANE_SYSTEM_ORGANIZATION	0.0160288	0.217511	0.20223	0.303883	0.580416	0.453352
GOBP_ENDONUCLEOLYTIC_CLEAVAGE_INVOLVED_IN_RRNA_PROCESSING	0.133039	0.673171	0.625878	1	1	1
GOBP_ENDOPLASMIC_RETICULUM_CALCIUM_ION_HOMEOSTASIS	0.665127	1	0.929747	0.377396	0.671104	0.524187
GOBP_ENDOPLASMIC_RETICULUM_LOCALIZATION	1	1	1	1	1	1
GOBP_ENDOPLASMIC_RETICULUM_MANNOSE_TRIMMING	0.00400851	0.0878488	0.0816771	1	1	1
GOBP_ENDOPLASMIC_RETICULUM_ORGANIZATION	0.16241	0.748224	0.695659	0.662465	0.818969	0.639682
GOBP_ENDOPLASMIC_RETICULUM_TO_CYTOSOL_TRANSPORT	0.0300907	0.313445	0.291425	0.433021	0.703978	0.549865
GOBP_ENDOPLASMIC_RETICULUM_TO_GOLGI_VESICLE_MEDIATED_TRANSPORT	0.0074674	0.134125	0.124703	0.847931	0.927624	0.72455
GOBP_ENDOPLASMIC_RETICULUM_TUBULAR_NETWORK_ORGANIZATION	0.545031	1	0.929747	0.0642832	0.230673	0.180174
GOBP_ENDOPLASMIC_RETICULUM_UNFOLDED_PROTEIN_RESPONSE	0.974494	1	0.929747	0.655508	0.814368	0.636088
GOBP_ENDOSOMAL_TRANSPORT	0.0314095	0.321662	0.299065	0.988393	1	0.781082
GOBP_ENDOSOME_ORGANIZATION	0.257431	0.912477	0.848372	0.794407	0.896374	0.700141
GOBP_ENDOSOME_TO_LYSOSOME_TRANSPORT	0.0753853	0.535543	0.497919	0.527071	0.738348	0.57671
GOBP_ENDOSOME_TO_PLASMA_MEMBRANE_PROTEIN_TRANSPORT	0.457979	0.997008	0.926964	0.163583	0.404082	0.315621
GOBP_ENDOSOME_TRANSPORT_VIA_MULTIVESICULAR_BODY_SORTING_PATHWAY	0.385092	0.997008	0.926964	1	1	1
GOBP_ENDOTHELIAL_CELL_ACTIVATION	1	1	1	0.474225	0.709902	0.554491
GOBP_ENDOTHELIAL_CELL_APOPTOTIC_PROCESS	0.519967	1	0.929747	0.115775	0.335686	0.262198
GOBP_ENDOTHELIAL_CELL_CHEMOTAXIS	0.753552	1	0.929747	0.00558978	0.0478376	0.0373651
GOBP_ENDOTHELIAL_CELL_DEVELOPMENT	0.94451	1	0.929747	0.260504	0.527103	0.411711
GOBP_ENDOTHELIAL_CELL_MIGRATION	0.64768	1	0.929747	2.29585e-05	0.000869115	0.00067885
GOBP_ENDOTHELIAL_CELL_MORPHOGENESIS	1	1	1	0.501661	0.725028	0.566306
GOBP_ENDOTHELIAL_CELL_PROLIFERATION	0.91568	1	0.929747	7.06455e-06	0.000322666	0.000252028
GOBP_ENDOTHELIUM_DEVELOPMENT	0.84301	1	0.929747	0.102464	0.312448	0.244048
GOBP_ENERGY_DERIVATION_BY_OXIDATION_OF_ORGANIC_COMPOUNDS	0.0535656	0.437734	0.406981	0.979351	1	0.781082
GOBP_ENERGY_HOMEOSTASIS	1	1	1	0.846846	0.927161	0.724189
GOBP_ENERGY_RESERVE_METABOLIC_PROCESS	0.725353	1	0.929747	0.671363	0.823401	0.643143
GOBP_ENGULFMENT_OF_APOPTOTIC_CELL	0.194271	0.803931	0.747452	0.0734862	0.253313	0.197859
GOBP_ENSHEATHMENT_OF_NEURONS	0.172333	0.783826	0.72876	0.122215	0.3512	0.274316
GOBP_ENTERIC_NERVOUS_SYSTEM_DEVELOPMENT	1	1	1	1	1	1
GOBP_ENTEROENDOCRINE_CELL_DIFFERENTIATION	1	1	1	1	1	1
GOBP_ENTRAINMENT_OF_CIRCADIAN_CLOCK	0.774228	1	0.929747	1	1	1
GOBP_ENTRY_INTO_HOST	0.643508	1	0.929747	0.000391143	0.007614	0.00594715
GOBP_ENTRY_OF_BACTERIUM_INTO_HOST_CELL	0.0241603	0.270901	0.251869	0.182563	0.430247	0.336058
GOBP_EOSINOPHIL_CHEMOTAXIS	1	1	1	0.0642832	0.230673	0.180174
GOBP_EOSINOPHIL_MIGRATION	1	1	1	0.0253574	0.128686	0.100514
GOBP_EPHRIN_RECEPTOR_SIGNALING_PATHWAY	0.00364413	0.0848202	0.0788613	0.662465	0.818969	0.639682
GOBP_EPIBOLY	0.445153	0.997008	0.926964	0.274723	0.545695	0.426232
GOBP_EPIDERMAL_CELL_DIFFERENTIATION	0.995159	1	0.929747	0.901214	0.9546	0.745621
GOBP_EPIDERMAL_GROWTH_FACTOR_RECEPTOR_SIGNALING_PATHWAY	0.0813774	0.547109	0.508673	0.192646	0.447484	0.349522
GOBP_EPIDERMIS_DEVELOPMENT	0.99935	1	0.929747	0.837411	0.92176	0.71997
GOBP_EPIDERMIS_MORPHOGENESIS	1	1	1	0.810181	0.90542	0.707207
GOBP_EPITHELIAL_CELL_APOPTOTIC_PROCESS	0.736803	1	0.929747	0.00742494	0.0588672	0.0459801
GOBP_EPITHELIAL_CELL_CELL_ADHESION	0.524674	1	0.929747	0.221332	0.477432	0.372914
GOBP_EPITHELIAL_CELL_DEVELOPMENT	0.97909	1	0.929747	0.518499	0.738348	0.57671
GOBP_EPITHELIAL_CELL_DIFFERENTIATION_INVOLVED_IN_KIDNEY_DEVELOPMENT	1	1	1	0.460583	0.709902	0.554491
GOBP_EPITHELIAL_CELL_DIFFERENTIATION_INVOLVED_IN_PROSTATE_GLAND_DEVELOPMENT	1	1	1	1	1	1
GOBP_EPITHELIAL_CELL_FATE_COMMITMENT	0.481189	1	0.929747	0.552318	0.747036	0.583496
GOBP_EPITHELIAL_CELL_MATURATION	1	1	1	0.552318	0.747036	0.583496
GOBP_EPITHELIAL_CELL_MORPHOGENESIS	1	1	1	0.218059	0.477432	0.372914
GOBP_EPITHELIAL_CELL_PROLIFERATION	0.820606	1	0.929747	4.85628e-07	4.25127e-05	3.32059e-05
GOBP_EPITHELIAL_CILIUM_MOVEMENT_INVOLVED_IN_DETERMINATION_OF_LEFT_RIGHT_ASYMMETRY	1	1	1	1	1	1
GOBP_EPITHELIAL_FLUID_TRANSPORT	0.354297	0.997008	0.926964	0.414743	0.689139	0.538274
GOBP_EPITHELIAL_STRUCTURE_MAINTENANCE	0.354005	0.997008	0.926964	0.0619321	0.22551	0.176142
GOBP_EPITHELIAL_TO_MESENCHYMAL_TRANSITION	0.961966	1	0.929747	0.0139444	0.0882443	0.068926
GOBP_EPITHELIAL_TO_MESENCHYMAL_TRANSITION_INVOLVED_IN_ENDOCARDIAL_CUSHION_FORMATION	0.503407	1	0.929747	1	1	1
GOBP_EPITHELIAL_TUBE_BRANCHING_INVOLVED_IN_LUNG_MORPHOGENESIS	0.69321	1	0.929747	0.76475	0.878875	0.686473
GOBP_EPITHELIAL_TUBE_FORMATION	0.623938	1	0.929747	0.478822	0.715245	0.558665
GOBP_EPITHELIAL_TUBE_MORPHOGENESIS	0.67558	1	0.929747	0.445647	0.703978	0.549865
GOBP_EPOXYGENASE_P450_PATHWAY	0.583171	1	0.929747	0.657579	0.814368	0.636088
GOBP_ER_ASSOCIATED_MISFOLDED_PROTEIN_CATABOLIC_PROCESS	0.0908616	0.569996	0.529952	1	1	1
GOBP_ER_NUCLEUS_SIGNALING_PATHWAY	0.901839	1	0.929747	0.771316	0.88288	0.689601
GOBP_ER_OVERLOAD_RESPONSE	1	1	1	0.474225	0.709902	0.554491
GOBP_ERAD_PATHWAY	0.0289957	0.307737	0.286118	0.274365	0.545695	0.426232
GOBP_ERBB_SIGNALING_PATHWAY	0.0470728	0.410519	0.381678	0.225411	0.485731	0.379396
GOBP_ERBB2_SIGNALING_PATHWAY	0.753552	1	0.929747	0.820097	0.909722	0.710567
GOBP_ERK1_AND_ERK2_CASCADE	0.994163	1	0.929747	0.00264998	0.0295453	0.0230773
GOBP_ERROR_FREE_TRANSLESION_SYNTHESIS	1	1	1	1	1	1
GOBP_ERROR_PRONE_TRANSLESION_SYNTHESIS	1	1	1	1	1	1
GOBP_ERYTHROCYTE_DEVELOPMENT	0.400392	0.997008	0.926964	0.820097	0.909722	0.710567
GOBP_ERYTHROCYTE_HOMEOSTASIS	0.0751468	0.535543	0.497919	0.180471	0.430247	0.336058
GOBP_ERYTHROCYTE_MATURATION	0.457979	0.997008	0.926964	0.527668	0.738348	0.57671
GOBP_ESCRT_COMPLEX_DISASSEMBLY	1	1	1	0.414743	0.689139	0.538274
GOBP_ESTABLISHMENT_OF_CELL_POLARITY	0.535524	1	0.929747	0.178335	0.429434	0.335423
GOBP_ESTABLISHMENT_OF_ENDOTHELIAL_BARRIER	0.877772	1	0.929747	0.23998	0.507533	0.396425
GOBP_ESTABLISHMENT_OF_ENDOTHELIAL_INTESTINAL_BARRIER	1	1	1	0.126883	0.353327	0.275977
GOBP_ESTABLISHMENT_OF_EPITHELIAL_CELL_APICAL_BASAL_POLARITY	0.481189	1	0.929747	1	1	1
GOBP_ESTABLISHMENT_OF_EPITHELIAL_CELL_POLARITY	0.718941	1	0.929747	1	1	1
GOBP_ESTABLISHMENT_OF_LYMPHOCYTE_POLARITY	1	1	1	0.0273013	0.134648	0.105171
GOBP_ESTABLISHMENT_OF_MITOCHONDRION_LOCALIZATION	0.290379	0.961274	0.893741	0.377396	0.671104	0.524187
GOBP_ESTABLISHMENT_OF_MITOTIC_SPINDLE_LOCALIZATION	0.764116	1	0.929747	0.246134	0.514555	0.401909
GOBP_ESTABLISHMENT_OF_MITOTIC_SPINDLE_ORIENTATION	0.706357	1	0.929747	0.177395	0.427416	0.333847
GOBP_ESTABLISHMENT_OF_ORGANELLE_LOCALIZATION	0.0189622	0.243337	0.226241	0.136258	0.373003	0.291346
GOBP_ESTABLISHMENT_OF_PIGMENT_GRANULE_LOCALIZATION	0.274297	0.940806	0.874711	0.0339415	0.153688	0.120043
GOBP_ESTABLISHMENT_OF_PLANAR_POLARITY_INVOLVED_IN_NEURAL_TUBE_CLOSURE	1	1	1	0.0218311	0.114668	0.0895649
GOBP_ESTABLISHMENT_OF_PLANAR_POLARITY_OF_EMBRYONIC_EPITHELIUM	1	1	1	0.0334298	0.153688	0.120043
GOBP_ESTABLISHMENT_OF_PROTEIN_LOCALIZATION_TO_CHROMOSOME	0.69321	1	0.929747	1	1	1
GOBP_ESTABLISHMENT_OF_PROTEIN_LOCALIZATION_TO_ENDOPLASMIC_RETICULUM	4.41915e-11	8.28592e-09	7.7038e-09	0.998501	1	0.781082
GOBP_ESTABLISHMENT_OF_PROTEIN_LOCALIZATION_TO_MEMBRANE	1.29303e-11	2.72748e-09	2.53586e-09	0.563923	0.761609	0.594879
GOBP_ESTABLISHMENT_OF_PROTEIN_LOCALIZATION_TO_MITOCHONDRIAL_MEMBRANE	0.397022	0.997008	0.926964	0.771316	0.88288	0.689601
GOBP_ESTABLISHMENT_OF_PROTEIN_LOCALIZATION_TO_PLASMA_MEMBRANE	0.0397292	0.370403	0.344381	0.011115	0.0777319	0.0607149
GOBP_ESTABLISHMENT_OF_PROTEIN_LOCALIZATION_TO_POSTSYNAPTIC_MEMBRANE	0.481189	1	0.929747	0.552318	0.747036	0.583496
GOBP_ESTABLISHMENT_OF_PROTEIN_LOCALIZATION_TO_TELOMERE	0.545031	1	0.929747	1	1	1
GOBP_ESTABLISHMENT_OF_PROTEIN_LOCALIZATION_TO_VACUOLE	0.00153561	0.0414613	0.0385485	0.286587	0.561156	0.438309
GOBP_ESTABLISHMENT_OF_RNA_LOCALIZATION	2.04029e-09	2.64845e-07	2.46239e-07	0.952692	0.985527	0.769777
GOBP_ESTABLISHMENT_OF_SISTER_CHROMATID_COHESION	0.354297	0.997008	0.926964	1	1	1
GOBP_ESTABLISHMENT_OF_SPINDLE_ORIENTATION	0.774228	1	0.929747	0.260377	0.527103	0.411711
GOBP_ESTABLISHMENT_OF_TISSUE_POLARITY	0.0164377	0.219278	0.203873	0.624703	0.794733	0.620751
GOBP_ESTABLISHMENT_OR_MAINTENANCE_OF_BIPOLAR_CELL_POLARITY	0.302625	0.987906	0.918502	0.206304	0.462835	0.361512
GOBP_ESTABLISHMENT_OR_MAINTENANCE_OF_CELL_POLARITY	0.691	1	0.929747	0.00765976	0.0601613	0.0469909
GOBP_ESTABLISHMENT_OR_MAINTENANCE_OF_MONOPOLAR_CELL_POLARITY	0.258197	0.912477	0.848372	0.339073	0.624084	0.48746
GOBP_ESTABLISHMENT_OR_MAINTENANCE_OF_TRANSMEMBRANE_ELECTROCHEMICAL_GRADIENT	1	1	1	0.144989	0.379592	0.296492
GOBP_ESTROGEN_BIOSYNTHETIC_PROCESS	1	1	1	0.144989	0.379592	0.296492
GOBP_ESTROGEN_METABOLIC_PROCESS	1	1	1	0.0130733	0.0842548	0.0658098
GOBP_ESTROUS_CYCLE	1	1	1	0.0218311	0.114668	0.0895649
GOBP_ETHANOL_CATABOLIC_PROCESS	1	1	1	0.144989	0.379592	0.296492
GOBP_ETHANOL_METABOLIC_PROCESS	1	1	1	0.000718078	0.0116952	0.00913491
GOBP_ETHANOL_OXIDATION	1	1	1	0.000222152	0.00491308	0.00383751
GOBP_ETHER_BIOSYNTHETIC_PROCESS	1	1	1	0.109375	0.322073	0.251565
GOBP_ETHER_METABOLIC_PROCESS	1	1	1	0.0440181	0.180805	0.141224
GOBP_EXCITATORY_SYNAPSE_ASSEMBLY	0.306415	0.989619	0.920094	1	1	1
GOBP_EXCRETION	1	1	1	0.611934	0.788998	0.616272
GOBP_EXECUTION_PHASE_OF_APOPTOSIS	0.375526	0.997008	0.926964	0.218876	0.477432	0.372914
GOBP_EXIT_FROM_MITOSIS	0.33825	0.997008	0.926964	0.777036	0.886053	0.69208
GOBP_EXOCRINE_SYSTEM_DEVELOPMENT	0.83387	1	0.929747	0.63807	0.800837	0.625519
GOBP_EXOCYTIC_PROCESS	0.0181947	0.235276	0.218747	0.780053	0.887515	0.693222
GOBP_EXPLORATION_BEHAVIOR	1	1	1	0.260667	0.527103	0.411711
GOBP_EXPORT_ACROSS_PLASMA_MEMBRANE	1	1	1	0.0358401	0.160043	0.125006
GOBP_EXTERNAL_ENCAPSULATING_STRUCTURE_ORGANIZATION	0.999971	1	0.929747	6.61421e-21	2.77929e-17	2.17085e-17
GOBP_EXTRACELLULAR_MATRIX_ASSEMBLY	1	1	1	1.44769e-05	0.000568525	0.000444064
GOBP_EXTRACELLULAR_MATRIX_CONSTITUENT_SECRETION	1	1	1	1	1	1
GOBP_EXTRACELLULAR_MATRIX_DISASSEMBLY	0.971282	1	0.929747	7.3799e-07	5.96353e-05	4.658e-05
GOBP_EXTRACELLULAR_REGULATION_OF_SIGNAL_TRANSDUCTION	0.408402	0.997008	0.926964	0.474225	0.709902	0.554491
GOBP_EXTRACELLULAR_TRANSPORT	1	1	1	1	1	1
GOBP_EXTRACELLULAR_VESICLE_BIOGENESIS	0.065653	0.494829	0.460066	0.104267	0.314298	0.245492
GOBP_EXTRINSIC_APOPTOTIC_SIGNALING_PATHWAY	0.325767	0.997008	0.926964	0.00478984	0.0427292	0.033375
GOBP_EXTRINSIC_APOPTOTIC_SIGNALING_PATHWAY_VIA_DEATH_DOMAIN_RECEPTORS	0.48659	1	0.929747	0.00132967	0.0188742	0.0147423
GOBP_EYE_MORPHOGENESIS	0.737547	1	0.929747	0.329767	0.616955	0.481892
GOBP_EYE_PHOTORECEPTOR_CELL_DEVELOPMENT	0.753552	1	0.929747	1	1	1
GOBP_EYE_PHOTORECEPTOR_CELL_DIFFERENTIATION	0.847814	1	0.929747	0.900312	0.953886	0.745063
GOBP_EYELID_DEVELOPMENT_IN_CAMERA_TYPE_EYE	0.0778596	0.535543	0.497919	0.44528	0.703978	0.549865
GOBP_FACE_DEVELOPMENT	0.290803	0.961274	0.893741	0.0775032	0.261581	0.204316
GOBP_FACIAL_NERVE_MORPHOGENESIS	1	1	1	0.414743	0.689139	0.538274
GOBP_FAT_CELL_DIFFERENTIATION	0.733988	1	0.929747	0.26442	0.532899	0.416238
GOBP_FAT_SOLUBLE_VITAMIN_BIOSYNTHETIC_PROCESS	0.433732	0.997008	0.926964	0.501661	0.725028	0.566306
GOBP_FAT_SOLUBLE_VITAMIN_METABOLIC_PROCESS	0.579442	1	0.929747	0.418815	0.693131	0.541392
GOBP_FATTY_ACID_BETA_OXIDATION	0.962623	1	0.929747	0.554217	0.749298	0.585263
GOBP_FATTY_ACID_BETA_OXIDATION_USING_ACYL_COA_DEHYDROGENASE	1	1	1	0.44528	0.703978	0.549865
GOBP_FATTY_ACID_BETA_OXIDATION_USING_ACYL_COA_OXIDASE	1	1	1	0.182563	0.430247	0.336058
GOBP_FATTY_ACID_BIOSYNTHETIC_PROCESS	0.999378	1	0.929747	0.0146766	0.0918141	0.0717143
GOBP_FATTY_ACID_CATABOLIC_PROCESS	0.944817	1	0.929747	0.101653	0.310426	0.242468
GOBP_FATTY_ACID_DERIVATIVE_BIOSYNTHETIC_PROCESS	0.933861	1	0.929747	0.0417862	0.175235	0.136873
GOBP_FATTY_ACID_DERIVATIVE_CATABOLIC_PROCESS	1	1	1	0.575683	0.76527	0.597739
GOBP_FATTY_ACID_DERIVATIVE_METABOLIC_PROCESS	0.972517	1	0.929747	0.0636107	0.230623	0.180136
GOBP_FATTY_ACID_ELONGATION	1	1	1	1	1	1
GOBP_FATTY_ACID_HOMEOSTASIS	1	1	1	0.59783	0.775573	0.605786
GOBP_FATTY_ACID_METABOLIC_PROCESS	0.998115	1	0.929747	7.93354e-06	0.000350913	0.000274092
GOBP_FATTY_ACID_TRANSMEMBRANE_TRANSPORT	0.888035	1	0.929747	0.0446272	0.182239	0.142343
GOBP_FATTY_ACID_TRANSPORT	0.958051	1	0.929747	0.0500214	0.193632	0.151242
GOBP_FATTY_ACYL_COA_BIOSYNTHETIC_PROCESS	1	1	1	0.218059	0.477432	0.372914
GOBP_FATTY_ACYL_COA_METABOLIC_PROCESS	1	1	1	0.376029	0.671104	0.524187
GOBP_FC_EPSILON_RECEPTOR_SIGNALING_PATHWAY	0.292811	0.96555	0.897717	0.515658	0.738348	0.57671
GOBP_FC_RECEPTOR_MEDIATED_STIMULATORY_SIGNALING_PATHWAY	0.584587	1	0.929747	0.018322	0.10433	0.0814903
GOBP_FC_RECEPTOR_SIGNALING_PATHWAY	0.143049	0.698684	0.649599	0.024456	0.125475	0.0980065
GOBP_FEAR_RESPONSE	0.802038	1	0.929747	0.581803	0.769996	0.60143
GOBP_FEEDING_BEHAVIOR	0.983052	1	0.929747	0.958347	0.9887	0.772256
GOBP_FEMALE_GAMETE_GENERATION	0.817075	1	0.929747	0.528717	0.73957	0.577664
GOBP_FEMALE_GENITALIA_DEVELOPMENT	1	1	1	0.575683	0.76527	0.597739
GOBP_FEMALE_MEIOTIC_NUCLEAR_DIVISION	0.69321	1	0.929747	0.414762	0.689139	0.538274
GOBP_FEMALE_SEX_DIFFERENTIATION	0.517925	1	0.929747	0.358659	0.650727	0.508271
GOBP_FERTILIZATION	0.998072	1	0.929747	0.798799	0.899229	0.702371
GOBP_FEVER_GENERATION	1	1	1	1	1	1
GOBP_FIBRINOLYSIS	0.665127	1	0.929747	0.0387924	0.168743	0.131802
GOBP_FIBROBLAST_ACTIVATION	1	1	1	0.0925834	0.289676	0.226261
GOBP_FIBROBLAST_APOPTOTIC_PROCESS	1	1	1	0.31963	0.599592	0.468331
GOBP_FIBROBLAST_GROWTH_FACTOR_RECEPTOR_SIGNALING_PATHWAY	0.354335	0.997008	0.926964	0.541296	0.747036	0.583496
GOBP_FIBROBLAST_MIGRATION	0.290803	0.961274	0.893741	0.0257155	0.12972	0.101322
GOBP_FIBROBLAST_PROLIFERATION	0.671226	1	0.929747	0.0028344	0.0307756	0.0240383
GOBP_FILOPODIUM_ASSEMBLY	0.509326	1	0.929747	0.00146197	0.0202079	0.015784
GOBP_FLAVONOID_METABOLIC_PROCESS	1	1	1	0.0402077	0.170487	0.133165
GOBP_FLUID_TRANSPORT	0.742516	1	0.929747	0.485868	0.721675	0.563687
GOBP_FOAM_CELL_DIFFERENTIATION	1	1	1	0.0130733	0.0842548	0.0658098
GOBP_FOCAL_ADHESION_ASSEMBLY	0.156321	0.733772	0.682222	0.00456201	0.042381	0.033103
GOBP_FOLIC_ACID_CONTAINING_COMPOUND_BIOSYNTHETIC_PROCESS	0.354297	0.997008	0.926964	0.414743	0.689139	0.538274
GOBP_FOLIC_ACID_CONTAINING_COMPOUND_METABOLIC_PROCESS	0.106855	0.621785	0.578103	0.0118173	0.0800905	0.0625573
GOBP_FOLIC_ACID_METABOLIC_PROCESS	0.0517263	0.427883	0.397823	0.00306872	0.0322369	0.0251796
GOBP_FOREBRAIN_CELL_MIGRATION	0.397022	0.997008	0.926964	0.771316	0.88288	0.689601
GOBP_FOREBRAIN_DEVELOPMENT	0.566348	1	0.929747	0.894872	0.951468	0.743174
GOBP_FOREBRAIN_GENERATION_OF_NEURONS	1	1	1	0.797118	0.89895	0.702154
GOBP_FOREBRAIN_MORPHOGENESIS	0.0655123	0.494829	0.460066	1	1	1
GOBP_FOREBRAIN_NEURON_DEVELOPMENT	1	1	1	0.738112	0.863459	0.674432
GOBP_FOREBRAIN_REGIONALIZATION	1	1	1	1	1	1
GOBP_FORELIMB_MORPHOGENESIS	1	1	1	0.854848	0.93111	0.727273
GOBP_FORMATION_OF_CYTOPLASMIC_TRANSLATION_INITIATION_COMPLEX	0.000416883	0.014098	0.0131076	1	1	1
GOBP_FORMATION_OF_EXTRACHROMOSOMAL_CIRCULAR_DNA	0.481189	1	0.929747	1	1	1
GOBP_FORMATION_OF_PRIMARY_GERM_LAYER	0.369704	0.997008	0.926964	0.00263341	0.0295083	0.0230484
GOBP_FORMATION_OF_TRANSLATION_PREINITIATION_COMPLEX	0.0778596	0.535543	0.497919	1	1	1
GOBP_FRUCTOSE_1_6_BISPHOSPHATE_METABOLIC_PROCESS	1	1	1	0.0925834	0.289676	0.226261
GOBP_FRUCTOSE_6_PHOSPHATE_METABOLIC_PROCESS	1	1	1	0.00180514	0.0231963	0.0181182
GOBP_FRUCTOSE_METABOLIC_PROCESS	1	1	1	0.0402077	0.170487	0.133165
GOBP_FUCOSE_METABOLIC_PROCESS	1	1	1	0.575683	0.76527	0.597739
GOBP_FUCOSYLATION	1	1	1	0.221332	0.477432	0.372914
GOBP_FUSION_OF_SPERM_TO_EGG_PLASMA_MEMBRANE_INVOLVED_IN_SINGLE_FERTILIZATION	1	1	1	0.6924	0.831751	0.649665
GOBP_G_PROTEIN_COUPLED_ACETYLCHOLINE_RECEPTOR_SIGNALING_PATHWAY	0.194271	0.803931	0.747452	0.260667	0.527103	0.411711
GOBP_G_PROTEIN_COUPLED_GLUTAMATE_RECEPTOR_SIGNALING_PATHWAY	0.481189	1	0.929747	0.552318	0.747036	0.583496
GOBP_G_PROTEIN_COUPLED_PURINERGIC_RECEPTOR_SIGNALING_PATHWAY	1	1	1	0.474225	0.709902	0.554491
GOBP_G_PROTEIN_COUPLED_RECEPTOR_INTERNALIZATION	1	1	1	1	1	1
GOBP_G_PROTEIN_COUPLED_RECEPTOR_SIGNALING_PATHWAY_COUPLED_TO_CYCLIC_NUCLEOTIDE_SECOND_MESSENGER	1	1	1	1	1	1
GOBP_G_PROTEIN_COUPLED_RECEPTOR_SIGNALING_PATHWAY_INVOLVED_IN_HEART_PROCESS	1	1	1	0.163583	0.404082	0.315621
GOBP_G0_TO_G1_TRANSITION	0.014502	0.203935	0.189608	0.919579	0.964571	0.753409
GOBP_G2_DNA_DAMAGE_CHECKPOINT	0.459657	0.997008	0.926964	0.566766	0.761609	0.594879
GOBP_GABAERGIC_NEURON_DIFFERENTIATION	1	1	1	0.474225	0.709902	0.554491
GOBP_GALACTOSE_METABOLIC_PROCESS	0.433732	0.997008	0.926964	0.501661	0.725028	0.566306
GOBP_GAMMA_AMINOBUTYRIC_ACID_SIGNALING_PATHWAY	1	1	1	0.76475	0.878875	0.686473
GOBP_GAMMA_AMINOBUTYRIC_ACID_TRANSPORT	1	1	1	1	1	1
GOBP_GAMMA_DELTA_T_CELL_ACTIVATION	1	1	1	0.63872	0.800837	0.625519
GOBP_GAMMA_DELTA_T_CELL_DIFFERENTIATION	1	1	1	0.474225	0.709902	0.554491
GOBP_GANGLION_DEVELOPMENT	1	1	1	0.0476216	0.188069	0.146898
GOBP_GANGLIOSIDE_BIOSYNTHETIC_PROCESS	1	1	1	0.552318	0.747036	0.583496
GOBP_GANGLIOSIDE_METABOLIC_PROCESS	0.290379	0.961274	0.893741	0.738112	0.863459	0.674432
GOBP_GAP_JUNCTION_ASSEMBLY	1	1	1	0.144989	0.379592	0.296492
GOBP_GAS_HOMEOSTASIS	1	1	1	0.414743	0.689139	0.538274
GOBP_GAS_TRANSPORT	1	1	1	0.00306872	0.0322369	0.0251796
GOBP_GASTRIC_ACID_SECRETION	1	1	1	1	1	1
GOBP_GASTRO_INTESTINAL_SYSTEM_SMOOTH_MUSCLE_CONTRACTION	1	1	1	0.474225	0.709902	0.554491
GOBP_GASTRULATION	0.501065	1	0.929747	0.00258651	0.0294098	0.0229714
GOBP_GASTRULATION_WITH_MOUTH_FORMING_SECOND	0.258197	0.912477	0.848372	0.70846	0.842136	0.657777
GOBP_GDP_METABOLIC_PROCESS	1	1	1	0.44528	0.703978	0.549865
GOBP_GENETIC_IMPRINTING	1	1	1	0.738112	0.863459	0.674432
GOBP_GENITALIA_DEVELOPMENT	1	1	1	0.894814	0.951468	0.743174
GOBP_GENITALIA_MORPHOGENESIS	1	1	1	1	1	1
GOBP_GERM_CELL_DEVELOPMENT	0.988331	1	0.929747	0.806105	0.904957	0.706845
GOBP_GERMINAL_CENTER_FORMATION	0.457979	0.997008	0.926964	0.163583	0.404082	0.315621
GOBP_GLAND_DEVELOPMENT	0.600525	1	0.929747	0.0641378	0.230673	0.180174
GOBP_GLAND_MORPHOGENESIS	0.953977	1	0.929747	0.0642551	0.230673	0.180174
GOBP_GLANDULAR_EPITHELIAL_CELL_DEVELOPMENT	1	1	1	1	1	1
GOBP_GLANDULAR_EPITHELIAL_CELL_DIFFERENTIATION	1	1	1	1	1	1
GOBP_GLIAL_CELL_APOPTOTIC_PROCESS	0.457979	0.997008	0.926964	0.527668	0.738348	0.57671
GOBP_GLIAL_CELL_DERIVED_NEUROTROPHIC_FACTOR_RECEPTOR_SIGNALING_PATHWAY	1	1	1	0.414743	0.689139	0.538274
GOBP_GLIAL_CELL_DEVELOPMENT	0.0508283	0.427628	0.397586	0.130369	0.361115	0.282061
GOBP_GLIAL_CELL_DIFFERENTIATION	0.288863	0.961274	0.893741	0.207938	0.466003	0.363986
GOBP_GLIAL_CELL_MIGRATION	1	1	1	0.742696	0.865998	0.676415
GOBP_GLIAL_CELL_PROLIFERATION	0.614797	1	0.929747	0.460583	0.709902	0.554491
GOBP_GLIOGENESIS	0.554546	1	0.929747	0.308625	0.588404	0.459591
GOBP_GLOBAL_GENOME_NUCLEOTIDE_EXCISION_REPAIR	0.306415	0.989619	0.920094	0.751787	0.869772	0.679363
GOBP_GLOMERULAR_BASEMENT_MEMBRANE_DEVELOPMENT	0.38194	0.997008	0.926964	0.44528	0.703978	0.549865
GOBP_GLOMERULAR_EPITHELIAL_CELL_DEVELOPMENT	1	1	1	1	1	1
GOBP_GLOMERULAR_EPITHELIAL_CELL_DIFFERENTIATION	1	1	1	1	1	1
GOBP_GLOMERULAR_EPITHELIUM_DEVELOPMENT	1	1	1	1	1	1
GOBP_GLOMERULAR_MESANGIAL_CELL_PROLIFERATION	1	1	1	0.109375	0.322073	0.251565
GOBP_GLOMERULAR_MESANGIUM_DEVELOPMENT	1	1	1	0.201841	0.458451	0.358088
GOBP_GLOMERULUS_DEVELOPMENT	0.933861	1	0.929747	0.406281	0.689139	0.538274
GOBP_GLUCAN_BIOSYNTHETIC_PROCESS	0.591486	1	0.929747	0.699819	0.838266	0.654754
GOBP_GLUCOCORTICOID_BIOSYNTHETIC_PROCESS	1	1	1	0.618822	0.790122	0.61715
GOBP_GLUCOCORTICOID_METABOLIC_PROCESS	1	1	1	0.738112	0.863459	0.674432
GOBP_GLUCOCORTICOID_SECRETION	1	1	1	1	1	1
GOBP_GLUCOSAMINE_CONTAINING_COMPOUND_METABOLIC_PROCESS	0.679476	1	0.929747	0.151597	0.392007	0.306189
GOBP_GLUCOSE_6_PHOSPHATE_METABOLIC_PROCESS	0.290379	0.961274	0.893741	0.0387924	0.168743	0.131802
GOBP_GLUCOSE_CATABOLIC_PROCESS	0.793171	1	0.929747	0.0100713	0.0724503	0.0565896
GOBP_GLUCOSE_IMPORT	0.831206	1	0.929747	0.342752	0.63058	0.492534
GOBP_GLUCOSE_METABOLIC_PROCESS	0.799444	1	0.929747	0.0139304	0.0882443	0.068926
GOBP_GLUTAMATE_METABOLIC_PROCESS	0.764116	1	0.929747	0.829495	0.914839	0.714564
GOBP_GLUTAMATE_RECEPTOR_SIGNALING_PATHWAY	0.668576	1	0.929747	0.771316	0.88288	0.689601
GOBP_GLUTAMATE_SECRETION	0.515368	1	0.929747	0.624584	0.794733	0.620751
GOBP_GLUTAMINE_FAMILY_AMINO_ACID_BIOSYNTHETIC_PROCESS	1	1	1	0.59783	0.775573	0.605786
GOBP_GLUTAMINE_FAMILY_AMINO_ACID_CATABOLIC_PROCESS	1	1	1	0.164345	0.404082	0.315621
GOBP_GLUTAMINE_FAMILY_AMINO_ACID_METABOLIC_PROCESS	0.962623	1	0.929747	0.0955729	0.296601	0.231669
GOBP_GLUTAMINE_METABOLIC_PROCESS	1	1	1	0.339073	0.624084	0.48746
GOBP_GLUTATHIONE_CATABOLIC_PROCESS	0.38194	0.997008	0.926964	0.109375	0.322073	0.251565
GOBP_GLUTATHIONE_DERIVATIVE_METABOLIC_PROCESS	1	1	1	0.000718078	0.0116952	0.00913491
GOBP_GLUTATHIONE_METABOLIC_PROCESS	0.939419	1	0.929747	0.000428686	0.00807775	0.00630938
GOBP_GLYCEROL_ETHER_METABOLIC_PROCESS	1	1	1	0.300052	0.575979	0.449887
GOBP_GLYCEROLIPID_BIOSYNTHETIC_PROCESS	0.0375714	0.3542	0.329316	0.156249	0.401074	0.313272
GOBP_GLYCEROLIPID_CATABOLIC_PROCESS	0.390816	0.997008	0.926964	0.000415899	0.00797995	0.00623299
GOBP_GLYCEROLIPID_METABOLIC_PROCESS	0.0521886	0.428556	0.398448	0.00398615	0.0383041	0.0299186
GOBP_GLYCEROPHOSPHOLIPID_CATABOLIC_PROCESS	0.400392	0.997008	0.926964	0.232019	0.495398	0.386946
GOBP_GLYCEROPHOSPHOLIPID_METABOLIC_PROCESS	0.0248895	0.277235	0.257758	0.196279	0.453287	0.354054
GOBP_GLYCINE_METABOLIC_PROCESS	1	1	1	0.260667	0.527103	0.411711
GOBP_GLYCINE_TRANSPORT	1	1	1	1	1	1
GOBP_GLYCOLIPID_BIOSYNTHETIC_PROCESS	0.787228	1	0.929747	0.685948	0.831751	0.649665
GOBP_GLYCOLIPID_CATABOLIC_PROCESS	0.147928	0.705289	0.65574	1	1	1
GOBP_GLYCOLYTIC_PROCESS_THROUGH_FRUCTOSE_6_PHOSPHATE	0.718941	1	0.929747	0.00334662	0.0341322	0.0266601
GOBP_GLYCOPROTEIN_BIOSYNTHETIC_PROCESS	0.810315	1	0.929747	0.00452413	0.0421516	0.0329238
GOBP_GLYCOPROTEIN_CATABOLIC_PROCESS	0.32238	0.997008	0.926964	0.164345	0.404082	0.315621
GOBP_GLYCOPROTEIN_METABOLIC_PROCESS	0.715527	1	0.929747	0.00725203	0.0577141	0.0450794
GOBP_GLYCOSIDE_CATABOLIC_PROCESS	0.354297	0.997008	0.926964	1	1	1
GOBP_GLYCOSIDE_METABOLIC_PROCESS	0.601026	1	0.929747	0.300052	0.575979	0.449887
GOBP_GLYCOSPHINGOLIPID_BIOSYNTHETIC_PROCESS	1	1	1	0.433021	0.703978	0.549865
GOBP_GLYCOSPHINGOLIPID_METABOLIC_PROCESS	0.158487	0.741877	0.689757	0.46508	0.709902	0.554491
GOBP_GLYCOSYL_COMPOUND_BIOSYNTHETIC_PROCESS	0.267273	0.934763	0.869093	0.0208512	0.113863	0.088936
GOBP_GLYCOSYL_COMPOUND_CATABOLIC_PROCESS	0.567139	1	0.929747	0.0775032	0.261581	0.204316
GOBP_GLYCOSYL_COMPOUND_METABOLIC_PROCESS	0.0501984	0.427628	0.397586	0.00296297	0.0318425	0.0248716
GOBP_GLYCOSYLATION	0.569111	1	0.929747	0.0337907	0.153688	0.120043
GOBP_GLYCOSYLCERAMIDE_METABOLIC_PROCESS	0.524674	1	0.929747	0.221332	0.477432	0.372914
GOBP_GLYOXYLATE_METABOLIC_PROCESS	1	1	1	1	1	1
GOBP_GMP_METABOLIC_PROCESS	1	1	1	0.0402077	0.170487	0.133165
GOBP_GOLGI_LOCALIZATION	0.118521	0.63393	0.589394	1	1	1
GOBP_GOLGI_ORGANIZATION	0.00070582	0.0218122	0.0202799	0.956855	0.987403	0.771243
GOBP_GOLGI_RIBBON_FORMATION	0.433732	0.997008	0.926964	1	1	1
GOBP_GOLGI_TO_ENDOSOME_TRANSPORT	0.524674	1	0.929747	1	1	1
GOBP_GOLGI_TO_LYSOSOME_TRANSPORT	0.38194	0.997008	0.926964	1	1	1
GOBP_GOLGI_TO_PLASMA_MEMBRANE_PROTEIN_TRANSPORT	0.232465	0.875634	0.814118	0.0147872	0.0918141	0.0717143
GOBP_GOLGI_TO_PLASMA_MEMBRANE_TRANSPORT	0.00018187	0.00667185	0.00620313	0.0860175	0.281939	0.220217
GOBP_GOLGI_TO_VACUOLE_TRANSPORT	0.0453648	0.404232	0.375833	1	1	1
GOBP_GOLGI_VESICLE_BUDDING	0.354297	0.997008	0.926964	0.414743	0.689139	0.538274
GOBP_GOLGI_VESICLE_TRANSPORT	4.52382e-06	0.000258778	0.000240598	0.878834	0.944468	0.737707
GOBP_GONADOTROPIN_SECRETION	1	1	1	0.501661	0.725028	0.566306
GOBP_GPI_ANCHOR_METABOLIC_PROCESS	0.41551	0.997008	0.926964	1	1	1
GOBP_GRANULOCYTE_CHEMOTAXIS	0.995473	1	0.929747	1.83764e-08	3.0887e-06	2.41253e-06
GOBP_GRANULOCYTE_DIFFERENTIATION	1	1	1	0.0908667	0.289676	0.226261
GOBP_GRANULOCYTE_MACROPHAGE_COLONY_STIMULATING_FACTOR_PRODUCTION	1	1	1	0.201841	0.458451	0.358088
GOBP_GRANULOCYTE_MIGRATION	0.988008	1	0.929747	9.43388e-09	1.88767e-06	1.47443e-06
GOBP_GROOMING_BEHAVIOR	1	1	1	1	1	1
GOBP_GROWTH_HORMONE_RECEPTOR_SIGNALING_PATHWAY_VIA_JAK_STAT	1	1	1	0.527668	0.738348	0.57671
GOBP_GROWTH_HORMONE_SECRETION	1	1	1	0.527668	0.738348	0.57671
GOBP_GROWTH_PLATE_CARTILAGE_DEVELOPMENT	1	1	1	0.182563	0.430247	0.336058
GOBP_GTP_BIOSYNTHETIC_PROCESS	1	1	1	0.44528	0.703978	0.549865
GOBP_GTP_METABOLIC_PROCESS	0.0810982	0.54632	0.507939	0.0339415	0.153688	0.120043
GOBP_GUANOSINE_CONTAINING_COMPOUND_BIOSYNTHETIC_PROCESS	1	1	1	0.501661	0.725028	0.566306
GOBP_GUANOSINE_CONTAINING_COMPOUND_METABOLIC_PROCESS	0.0903935	0.569996	0.529952	0.0166511	0.0990699	0.0773817
GOBP_HAIR_CELL_DIFFERENTIATION	0.554578	1	0.929747	0.900312	0.953886	0.745063
GOBP_HAIR_FOLLICLE_MATURATION	0.408402	0.997008	0.926964	0.474225	0.709902	0.554491
GOBP_HEAD_MORPHOGENESIS	0.764116	1	0.929747	0.246134	0.514555	0.401909
GOBP_HEART_FIELD_SPECIFICATION	0.545031	1	0.929747	0.618822	0.790122	0.61715
GOBP_HEART_FORMATION	0.718941	1	0.929747	0.788681	0.891504	0.696337
GOBP_HEART_GROWTH	0.13662	0.678077	0.63044	0.772217	0.88288	0.689601
GOBP_HEART_MORPHOGENESIS	0.890347	1	0.929747	0.935257	0.97367	0.760515
GOBP_HEART_PROCESS	0.999708	1	0.929747	0.120943	0.348322	0.272068
GOBP_HEART_TRABECULA_FORMATION	0.433732	0.997008	0.926964	1	1	1
GOBP_HEART_TRABECULA_MORPHOGENESIS	0.135328	0.677646	0.630039	1	1	1
GOBP_HEART_VALVE_DEVELOPMENT	0.7418	1	0.929747	0.962091	0.990617	0.773753
GOBP_HEART_VALVE_FORMATION	1	1	1	1	1	1
GOBP_HEAT_GENERATION	1	1	1	1	1	1
[truncated: 3,923 more rows]

## Sheet: S3D.BRCA.GOBP
Table S3D. GO (Gene Ontology) enrichment for BRCA analysis in Group1 and Group2.
[truncated: 5,152 more rows]

[truncated: 16 more sheets: S3E.OV.GOBP, S3F.HNSC.GOBP, S3G.ccRCC.GOBP, S3H.UCEC.GOBP, S3I.LUAD.GOBP, S3J.correlation, S3K.comprehensive table, S3L.sublocation, S3M.Pan-cancer.PM.GO, S3N.COAD.PM.GO, S3O.Breast.PM.GO, S3P.OV.PM.GO, S3Q.HNSC.PM.GO, S3R.ccRCC.PM.GO, S3S.UCEC.PM.GO, S3T.LUAD.Pm.GO]
