# Supplementary material for: Proteogenomic analysis of cancer aneuploidy and normal tissues reveals divergent modes of gene regulation across cellular pathways
Source: eLife. 2022 Sep 21;11:e75227. doi: 10.7554/eLife.75227 (PMC9491860; doi:10.7554/eLife.75227)
Supplement: Supplementary file 4. [file elife-75227-supp4.xlsx]

## Sheet: 4A_tValue_CPTAC_Protein
table 4A: t-value of aneuploidy coefficient of the linear model: protein ~ Aneuploidy score + other variable
model:	protein ~ AS	protein ~ AS + cancer types	protein ~ AS + copy number variation	protein ~ AS + purity (estimated)	protein ~ AS + purity (nuclei)	protein ~ AS + Cell cycle	protein ~ AS, remove mitochondrial genes
gene	AS_Tvalue_AS	AS_Tvalue_AS+Cancer	AS_Tvalue_AS+CNV	AS_Tvalue_AS+estiPurity	AS_Tvalue_AS+nucleiPurity	AS_Tvalue_AS+CellCycle	AS_Tvalue_AS+removeMito
AAAS	3.2428	4.03724	3.1449	1.52095	4.00119	2.76546	3.2428
AACS	0.998094	1.28796	0.855311	-1.13098	2.12918	0.697092	0.998094
AAGAB	-1.1898	-0.857692	0.740785	-2.32545	-0.51807	-1.65938	-1.1898
AAMP	1.35783	0.794365	1.32465	-0.20496	-1.17433	1.04011	1.35783
AAR2	7.83926	7.42694	3.9771	5.94297	3.40862	7.47936	7.83926
AASDHPPT	0.831396	1.25567	2.03773	0.763891	0.237464	0.722577	0.831396
AASS	-2.15266	-1.83711	-2.42685	-1.58505	0.478983	-2.00948	NA
AATF	5.53745	6.21999	5.50357	3.34929	5.49134	5.08542	5.53745
ABAT	2.20983	2.07051	1.03107	0.439045	1.99392	2.80264	NA
ABCB1	0.00919254	-0.246802	-0.590978	0.486357	-0.812564	0.134701	0.00919254
ABCB10	4.57777	3.8446	2.31154	2.05885	3.81402	4.39923	NA
ABCB6	1.32331	1.72174	1.26437	0.143396	1.94896	1.34794	NA
ABCB8	2.97348	3.07345	1.9852	1.67041	2.35149	2.9571	NA
ABCC3	0.360204	0.0307288	-0.097657	-1.09466	0.330741	0.813394	0.360204
ABCC4	3.06222	2.73277	3.1024	2.13475	2.67795	3.22227	3.06222
ABCD3	2.64167	2.77543	3.73283	0.0346525	2.32757	2.57121	NA
ABCE1	0.133711	0.751625	2.73872	0.515835	-0.240949	-0.608368	0.133711
ABCF3	2.8707	2.31107	-0.712983	1.19982	1.4235	2.46082	2.8707
ABHD10	1.43405	1.22236	0.43202	-0.737614	1.23129	1.72071	NA
ABHD11	4.55564	4.91797	2.69389	2.94735	3.77197	4.57829	NA
ABHD12	3.95355	2.88618	1.43444	1.47939	4.61549	3.73317	3.95355
ABHD17B	0.825246	0.150259	1.69344	-0.593446	0.322777	0.93094	0.825246
ABHD6	-2.3974	-2.52834	-2.26434	-2.77267	-2.05036	-1.97234	-2.3974
ABI1	-0.0626023	0.190855	0.0899883	0.122955	-4.46821	-0.199443	-0.0626023
ABI2	-1.62463	-1.32179	-1.43394	-1.11072	-0.442714	-1.04637	-1.62463
ABLIM2	-1.90055	-2.2882	-0.95834	-1.19554	-3.18825	-0.301845	-1.90055
ABR	-6.58434	-7.15953	-5.51895	-3.50029	-6.73463	-6.43558	-6.58434
ABT1	5.63098	5.77801	5.15079	4.84894	4.75064	4.43691	5.63098
ACAA1	0.416308	-0.0476102	0.114946	-1.17173	-1.45164	0.757605	NA
ACAA2	0.205401	0.102035	1.46446	2.03029	-1.72635	0.621416	NA
ACAD8	-0.320522	0.293478	0.757555	-1.14804	0.847179	0.164725	NA
ACAD9	4.84167	4.52478	3.57414	2.36087	2.51618	4.61118	NA
ACADM	-2.7667	-2.71847	-1.28839	-3.16321	-3.4426	-2.4912	NA
ACADS	-0.992278	-1.44242	-1.02462	-1.26972	-0.304468	-0.427675	NA
ACADSB	0.166737	0.54849	0.760786	-1.57351	1.68258	0.530289	NA
ACADVL	-1.14016	-0.505702	1.7935	-0.875721	-0.280949	-0.684329	NA
ACAP1	-5.54717	-7.18894	-6.09052	-1.49445	-9.48509	-5.75395	-5.54717
ACAP2	-1.24136	-1.67913	-6.20625	0.963231	-0.352634	-1.28156	-1.24136
ACAT2	0.0355968	0.418671	0.805333	-0.988188	-0.218265	-0.202151	0.0355968
ACBD3	-0.46651	-1.21722	-2.52066	-2.09351	-0.237765	-0.351383	-0.46651
ACBD5	-0.173684	-0.437846	0.0273738	-1.86871	-1.01892	-0.612673	-0.173684
ACE	-4.6304	-4.39375	-4.21614	-2.79057	-3.57042	-4.45078	-4.6304
ACIN1	0.455887	0.98216	0.535842	-0.84043	2.48226	0.319399	0.455887
ACLY	0.980629	1.39908	0.513317	1.11847	0.926904	0.493173	NA
ACO1	-2.79973	-3.18991	-2.55413	-1.45985	-1.75223	-2.40317	NA
ACO2	-0.368429	0.440116	1.98352	0.118099	-0.917453	0.00117396	NA
ACOT11	-0.477641	-0.228149	0.537786	-0.506412	-2.08863	-0.553652	-0.477641
ACOT13	4.62261	4.7976	4.15196	2.56453	2.72475	4.88632	NA
ACOT8	6.8848	5.65024	2.61289	4.10782	2.41378	6.62847	6.8848
ACOX1	0.758279	0.363401	-0.265351	-0.319432	1.46867	0.686025	NA
ACOX3	-2.87833	-2.485	-0.610508	-2.95987	-2.49785	-2.83842	NA
ACP1	0.918975	1.59011	-0.0056798	-0.48247	0.386054	1.02689	0.918975
ACP2	-1.07546	-1.12754	-0.933546	-1.00301	-0.831283	-1.17263	-1.07546
ACP5	0.178931	0.0145721	0.185203	1.16443	0.0159588	0.0391698	0.178931
ACPP	0.76554	0.476259	0.0101545	-1.07136	1.07692	0.844077	0.76554
ACSF2	1.67064	1.61286	1.20776	1.39219	0.160998	2.1611	NA
ACSF3	0.286825	1.20366	1.07735	0.541898	-0.773357	0.573673	NA
ACSL1	-0.175614	-0.149694	1.50189	1.37578	1.09477	0.0302442	NA
ACSL3	0.392844	0.582743	0.518021	-0.968085	1.10847	-0.177154	0.392844
ACSL5	-0.842781	-0.255749	0.313334	-0.234291	-1.20433	-0.391652	-0.842781
ACSS1	2.13174	1.86141	-0.374706	0.846264	2.01566	2.4916	NA
ACSS2	2.97696	2.41172	0.388466	1.34548	1.61613	3.43218	2.97696
ACTB	-3.64156	-2.79696	-4.09325	1.39858	-3.55641	-3.45012	-3.64156
ACTG1	-3.00194	-3.56939	-2.93542	-0.182586	-2.97166	-2.93769	-3.00194
ACTN1	-1.97457	-2.06597	-1.73125	1.42481	-2.39554	-2.03302	-1.97457
ACTR1A	-7.47398	-7.60839	-5.57978	-4.91493	-6.41786	-7.11481	-7.47398
ACTR1B	-4.40703	-4.39076	-5.26412	-3.13629	-1.46012	-3.93418	-4.40703
ACTR5	1.78516	1.33041	-0.0502125	1.59782	0.254115	1.74757	1.78516
ACTR6	3.15389	3.87281	2.66952	2.77275	2.5254	2.74446	3.15389
ACTR8	0.627172	0.166019	0.942408	-1.22348	-0.952205	0.390665	0.627172
ACYP1	0.391573	0.23772	1.02353	-1.57958	-0.338058	0.328192	0.391573
ACYP2	-4.27859	-4.50187	-4.68756	-2.74956	-4.25817	-3.93528	NA
ADA	-4.42825	-4.35052	-5.10244	-0.206195	-4.94449	-4.87121	-4.42825
ADAM10	-2.09878	-3.09313	0.194737	-4.20109	-0.940392	-2.02164	-2.09878
ADAM15	1.12986	0.243127	-0.562542	-0.759951	1.98918	0.949996	1.12986
ADAM17	-0.69581	-0.823088	-1.03836	-1.3649	1.14343	-0.932641	-0.69581
ADAM9	-0.0682696	0.191568	-1.05102	-1.2505	1.1513	-0.376478	-0.0682696
ADAR	3.81552	3.75309	-0.0029484	1.92509	3.56128	3.43135	3.81552
ADCY6	-0.557938	-0.585533	-0.532453	-1.20675	0.107569	-0.495947	-0.557938
ADD3	-4.52549	-4.62926	-3.86153	-1.93224	-3.52968	-3.96943	-4.52549
ADH5	-5.68773	-5.90414	-2.92875	-3.1484	-4.05308	-5.16129	-5.68773
ADK	-0.428067	-0.113585	1.18122	-0.517473	0.0506602	-0.220606	-0.428067
ADNP	11.7757	10.6906	6.67105	7.19415	9.42607	11.5143	11.7757
ADO	-2.76244	-2.68716	-0.345718	-1.37535	-1.11149	-2.55168	-2.76244
ADPGK	-3.53881	-3.03857	-1.7124	-0.899224	-2.23077	-4.05736	-3.53881
ADPRH	-4.0082	-4.7898	-4.95438	-0.184712	-5.42576	-3.69405	-4.0082
ADPRHL2	-2.37175	-1.75798	-0.660282	-0.692771	-1.32421	-2.0669	-2.37175
ADRM1	0.920764	0.883988	-0.93569	-0.346938	-0.201891	0.633557	0.920764
ADSS	2.58881	2.05708	-0.295863	1.64024	2.73722	2.276	2.58881
AFAP1	-2.0636	-1.84507	-0.897122	2.12882	-2.63453	-2.05889	-2.0636
AFAP1L2	-3.246	-3.17201	-2.22478	-1.38726	-3.60603	-3.26509	-3.246
AFF4	3.38427	4.11456	3.8657	2.5481	2.50515	3.05216	3.38427
AFG3L2	4.92117	5.35434	7.29959	1.71115	4.74646	4.65658	NA
AFMID	-3.30628	-3.60208	-3.78451	-4.24994	-1.36901	-2.43886	-3.30628
AGAP1	0.414941	0.370292	0.900189	-0.639848	0.523444	0.907322	0.414941
AGAP3	-1.08802	-0.788511	-1.80583	-0.960973	-1.42462	-1.06798	-1.08802
AGFG2	-1.23494	-1.83381	-2.43786	-1.06751	-0.766243	-0.696213	-1.23494
AGK	7.36024	7.3254	5.64579	4.16744	6.50529	7.23869	NA
AGL	0.160449	-0.232198	1.31548	0.138936	-0.269498	0.534477	0.160449
AGO1	-3.5222	-4.22502	-2.56888	-2.49386	-2.69503	-2.75905	-3.5222
AGO2	5.69858	4.57419	1.08574	5.62885	2.06517	5.94201	5.69858
AGO3	-1.8916	-2.00355	-0.822615	-0.0714355	-1.31004	-1.23471	-1.8916
AGPAT2	-0.224077	-0.32957	0.347331	0.030898	0.804291	-0.272988	-0.224077
AGPAT3	-0.645795	-1.19312	0.674469	-0.791643	-0.0536526	-0.550293	-0.645795
AGPAT5	0.884363	1.33305	3.78018	-0.274549	-0.490491	0.780048	NA
AGPS	-0.683068	-1.00346	-1.24293	-1.55117	-0.769759	-1.0734	-0.683068
AGR2	-1.8144	-2.25204	-2.25058	-3.18511	-0.545345	-1.73596	NA
AGR3	-2.92815	-2.80504	-3.63072	-3.92105	-1.17286	-2.61164	-2.92815
AGRN	-1.05865	-0.462116	-0.591519	-0.27002	0.841992	-0.763721	-1.05865
AGT	-3.40181	-3.96742	-3.43841	-1.63315	-2.37978	-3.06302	-3.40181
AHCY	4.37098	4.36041	0.924877	3.68996	2.46507	4.29309	4.37098
AHCYL1	-2.67171	-2.50474	-1.69194	-2.17175	-1.31274	-2.28526	NA
AHCYL2	-2.24923	-2.22452	-2.76225	-3.58751	-0.7083	-1.81523	-2.24923
AHNAK	-4.92749	-4.94866	-4.99503	-3.7099	-4.17988	-4.41155	-4.92749
AHNAK2	-1.23413	-1.59004	-1.23013	-0.192322	-0.771776	-1.26657	-1.23413
AHR	-1.48444	-1.32077	-2.95274	-0.0293255	0.0421456	-1.25815	-1.48444
AHSA1	3.59809	4.31151	5.78013	1.85961	4.88864	3.00373	3.59809
AIDA	-4.09215	-3.9372	-5.23984	-1.05286	-3.402	-3.76377	-4.09215
AIMP2	1.46345	1.7916	0.55976	0.660679	1.64636	1.16661	1.46345
AIP	-0.0413914	0.00763962	-1.56282	1.78039	-0.543099	0.12812	-0.0413914
AK2	3.03423	3.81485	4.19769	2.0532	2.68634	3.41925	NA
AK3	-0.470713	-0.298807	0.551387	-0.716393	-1.40461	0.147869	NA
AKAP1	6.56224	6.92221	5.71592	4.09619	4.7363	6.6085	NA
AKAP12	-4.59054	-5.31711	-4.34846	-0.585477	-3.99668	-4.10261	-4.59054
AKAP13	-3.30697	-2.93329	-1.87028	-0.72785	-1.72661	-3.05054	-3.30697
AKAP9	1.58562	1.81909	-0.668766	0.843817	2.4527	1.75133	1.58562
AKR1A1	-6.76144	-6.82781	-5.98654	-4.44659	-4.51578	-6.34774	-6.76144
AKR1B1	-2.6313	-2.70834	-3.27744	0.357499	-1.54006	-2.28352	-2.6313
AKR1B10	-0.76172	-0.521438	-1.00372	-1.51811	-0.312292	-0.869718	NA
AKT1	-2.86892	-2.86678	-2.86741	-1.67128	-0.949467	-2.74803	-2.86892
AKT2	-2.56733	-2.59196	-3.48239	-0.20993	-2.64349	-2.40674	-2.56733
AKT3	-4.4265	-3.57256	-3.84477	-0.219723	-3.5907	-3.83778	-4.4265
AKTIP	2.74714	3.31609	3.55421	0.956324	2.62629	3.01787	2.74714
ALAD	-3.41751	-3.69422	-2.89411	-2.67083	-2.36563	-2.85691	-3.41751
ALAS1	1.90887	1.67972	1.92884	0.166841	1.8652	1.50135	NA
ALCAM	1.58734	1.07346	1.08187	-1.10301	2.28642	1.9309	1.58734
ALDH16A1	-4.4921	-5.5829	-4.64567	-2.72877	-5.69212	-4.39805	-4.4921
ALDH18A1	2.35884	2.64671	3.81865	0.60659	2.06342	2.15112	NA
ALDH1A1	-3.41436	-3.83931	-3.11507	-1.24403	-0.877345	-2.95983	-3.41436
ALDH1A3	-4.82474	-5.03537	-4.44252	-1.42108	-4.95773	-4.52146	-4.82474
ALDH1B1	0.835019	0.576373	0.953904	2.97832	-1.88816	0.98137	NA
ALDH1L2	-3.88493	-3.54559	-4.0535	0.467491	-2.94636	-3.80745	NA
ALDH3A2	1.14321	1.80491	3.19395	-0.896648	2.44442	1.50663	NA
ALDH5A1	4.92751	4.97186	4.43947	2.86872	3.29927	5.32765	NA
ALDH6A1	0.580697	1.01304	1.51803	-1.53027	2.57197	1.22558	NA
ALDH9A1	-0.194151	-1.07379	-2.97279	-1.22075	-1.06883	0.563108	NA
ALDOB	-0.201857	0.253462	-0.329086	0.234421	0.726828	-0.153111	-0.201857
ALDOC	-0.185125	-0.0613563	-0.345161	1.26015	2.21886	-0.304277	-0.185125
ALG12	-1.01218	-0.763779	0.280786	-0.500832	0.00620641	-0.826682	-1.01218
ALG2	-4.76075	-5.44203	-3.32158	-3.64029	-4.43707	-4.52779	-4.76075
ALG5	-1.55689	-2.17437	-2.42923	-1.54329	-2.47753	-1.4124	-1.55689
ALG6	2.46035	1.75327	3.01697	1.08172	1.34758	2.48173	2.46035
ALG9	-0.391452	-0.422218	0.254647	-0.512801	0.463097	-0.375013	-0.391452
ALKBH5	0.300474	1.29328	4.43182	0.485026	1.88822	-0.0306894	0.300474
ALKBH7	2.64316	3.38163	3.15469	1.12155	1.28245	2.55513	NA
ALOX5	-6.59784	-6.89513	-6.5359	-1.80964	-5.38162	-6.62133	-6.59784
AMFR	-0.335454	0.17608	0.627719	-0.369133	0.258955	-0.483141	-0.335454
AMPD2	-2.35799	-2.79587	-0.795075	1.40861	-4.14389	-2.26067	-2.35799
AMPD3	-2.97287	-3.29387	-2.8067	-0.764421	-2.09708	-2.88219	-2.97287
ANAPC16	0.354192	0.497568	0.395793	1.08157	-0.10313	0.202072	0.354192
ANAPC2	0.274244	1.2775	1.12522	0.85543	-0.263586	-0.1734	0.274244
ANAPC4	-2.08878	-1.61795	-0.791316	-1.51692	-1.92655	-2.44833	-2.08878
ANGEL2	2.44281	1.61436	-0.29284	0.613732	1.33145	2.76667	NA
ANGPTL2	-3.01959	-2.89995	-3.0656	0.458107	-2.98039	-2.7843	-3.01959
ANK2	0.892833	0.31383	1.01114	1.35059	0.13738	1.13339	0.892833
ANK3	1.50157	1.45301	1.64364	0.568019	1.54515	1.95338	1.50157
ANKFY1	-7.55208	-6.89003	-4.35447	-4.85483	-4.6803	-7.2346	-7.55208
ANKLE2	0.806187	0.862152	0.764455	0.364277	1.05324	0.258169	0.806187
ANKMY2	-0.677103	-0.765147	-3.61889	-1.47109	0.500292	-0.221641	-0.677103
ANKRD13A	-3.82941	-3.92629	-4.18144	-0.421004	-3.19634	-3.66022	-3.82941
ANKRD17	2.18329	2.51885	4.22526	1.00339	1.98884	1.47122	2.18329
ANKRD22	-1.97618	-2.2237	-1.76005	-0.760441	-2.1399	-2.19551	-1.97618
ANKRD27	2.4527	2.29509	1.47631	3.56649	1.86929	2.29215	2.4527
ANKRD28	1.88431	2.07239	1.98755	1.02214	1.18295	1.71093	1.88431
ANKRD44	-7.79897	-8.37754	-7.88499	-1.3467	-8.66161	-7.78368	-7.79897
ANKS1A	2.58301	2.71262	1.60058	0.350314	2.06271	2.52119	2.58301
ANKZF1	0.579006	0.0781033	0.689336	-0.940355	-0.878774	-0.12318	0.579006
ANLN	5.18354	5.48985	3.94583	4.57652	3.95553	3.67671	5.18354
ANO1	-0.513424	-0.659515	-3.36127	0.0987706	0.366791	-0.702979	-0.513424
ANO10	0.208355	-0.621316	0.207472	-0.386703	-1.52047	0.233002	0.208355
ANO6	-4.32238	-5.0809	-4.60188	-2.67278	-4.32289	-4.16771	-4.32238
ANP32A	-0.78211	-0.508996	1.21174	-2.55557	0.515878	-0.578887	-0.78211
ANP32B	1.97124	1.86534	3.54447	0.74699	0.48114	1.77306	1.97124
ANP32E	1.69212	2.01973	-0.0629395	1.10808	2.58567	1.31404	1.69212
ANPEP	-1.13924	0.00877161	-1.15681	0.0794694	0.157224	-1.31938	-1.13924
ANTXR1	-0.412825	-1.33458	-0.516058	1.85944	-0.926351	-0.290991	-0.412825
ANTXR2	-5.32848	-6.09226	-4.12875	-2.19076	-4.483	-5.14671	-5.32848
ANXA1	-4.25991	-5.30038	-3.77214	-2.21999	-3.77969	-4.25829	-4.25991
ANXA11	-4.02147	-3.75519	-2.13614	-2.28885	-4.13879	-3.66088	-4.02147
ANXA2	-5.31832	-4.81462	-3.88978	-3.47602	-3.76258	-5.06768	-5.31832
ANXA4	-1.82019	-1.73039	-2.72257	-0.865817	-1.43037	-1.33015	-1.82019
ANXA5	-5.04175	-4.96231	-3.28352	-0.285383	-4.19413	-4.54021	-5.04175
ANXA6	-7.71641	-8.29292	-7.60668	-1.25434	-7.93677	-7.3693	-7.71641
ANXA7	-4.71252	-3.73432	-2.23331	-3.1977	-2.2412	-4.33859	-4.71252
AOC3	-4.32356	-4.54407	-4.3169	-0.89573	-4.40946	-3.92355	-4.32356
AOX1	-5.49584	-5.50301	-5.62469	-3.72492	-3.58155	-4.8594	-5.49584
AP1G1	0.398237	1.61846	1.44392	-0.765778	2.20532	0.43096	0.398237
AP1G2	-4.24244	-4.29342	-4.17318	-4.53929	-2.67319	-4.25301	-4.24244
AP1S1	0.960638	0.865407	0.836138	-1.93718	1.85223	1.30019	0.960638
AP2A1	-3.69504	-4.28082	-3.6227	0.3505	-5.91018	-3.70464	-3.69504
AP2A2	-2.68138	-2.84267	-1.60649	-0.696162	-1.2447	-2.36646	-2.68138
AP2S1	-3.70694	-3.46405	-3.41354	-1.13808	-3.28059	-3.50544	-3.70694
AP3D1	-1.95297	-1.97504	-0.413327	-2.4333	-2.34409	-1.8437	-1.95297
AP3M2	0.585063	0.556339	-0.992917	0.459805	0.181518	0.941747	0.585063
AP3S1	-2.43026	-2.59325	-0.597466	-1.78779	-4.78021	-2.24588	-2.43026
AP5B1	-1.2239	-1.60898	-1.30148	-0.4651	-0.689341	-1.33182	-1.2239
AP5Z1	-1.94533	-2.21849	-2.69815	-0.124297	-1.79638	-1.86583	-1.94533
APAF1	-3.55688	-3.89407	-4.25117	-1.58573	-2.96348	-3.99799	-3.55688
APBB1IP	-8.4965	-9.77039	-8.57891	-2.80769	-8.40512	-8.5576	-8.4965
APBB2	-1.45528	-1.40669	0.391492	0.219879	-2.26311	-0.882979	-1.45528
APEH	-4.01721	-4.94266	-4.03122	-5.72081	-4.3618	-3.77446	-4.01721
APEX1	1.85484	2.23715	2.54708	0.0681275	3.15677	1.92736	1.85484
APIP	0.84949	0.526925	-0.923053	0.369859	-0.47014	1.31411	0.84949
APLP2	3.39873	4.21321	4.35205	1.65961	4.10283	3.39966	3.39873
APMAP	4.66656	3.79505	1.43015	2.59365	4.57098	4.68716	4.66656
APOBR	-2.57407	-3.57944	-3.67532	0.0534947	-5.63946	-2.66605	-2.57407
APOD	0.380487	0.533664	0.83536	1.1251	-1.3804	0.549065	0.380487
APOE	-2.53499	-2.54402	-2.62874	-0.309583	-2.03424	-2.64334	-2.53499
APOL2	-7.32103	-7.18902	-6.48728	-3.40657	-6.12214	-7.99274	-7.32103
APP	2.83882	3.3255	4.50758	1.54824	3.83058	2.78041	2.83882
APPL1	-1.96918	-3.69414	-1.685	-2.14867	-4.60062	-1.2414	-1.96918
APPL2	-2.48136	-2.1839	-3.16063	-2.18184	-1.64501	-1.92421	-2.48136
APRT	-0.322506	0.968553	1.28576	0.47884	0.235165	-0.0405728	-0.322506
APTX	3.07589	3.30621	3.89394	0.656822	2.53949	3.02055	3.07589
ARAP1	-2.86924	-3.05689	-4.95871	0.447574	-2.22094	-2.84565	-2.86924
ARCN1	-4.94965	-4.90845	-4.09192	-4.81883	-2.80404	-4.80772	-4.94965
ARF4	-3.24765	-3.74181	-2.91657	-3.20874	-3.71285	-3.10518	-3.24765
ARF5	2.32412	2.65313	0.0170115	0.721471	1.99051	2.26275	NA
ARF6	-1.8987	-2.04605	-1.69091	-3.33019	-0.403479	-1.79239	-1.8987
ARFGEF1	7.23889	6.86308	1.7431	4.44233	4.51257	7.15564	7.23889
ARFGEF2	4.66464	3.77821	-0.0136587	1.86433	0.841571	4.71894	4.66464
ARFIP1	1.04331	1.22323	3.94303	0.971264	-0.458227	1.17066	1.04331
ARFIP2	-4.66273	-4.4935	-3.44247	-6.87454	-1.96315	-4.45088	-4.66273
ARFRP1	2.11846	1.49326	-1.7546	1.17536	-0.0852476	2.19503	2.11846
ARGLU1	0.587048	0.775798	-0.17025	-0.475844	0.905894	0.645331	0.587048
ARHGAP1	-4.00077	-4.57785	-3.81629	-0.869524	-4.02891	-3.62337	-4.00077
ARHGAP10	-5.03544	-5.37622	-3.71269	-1.54235	-5.81655	-4.9767	-5.03544
ARHGAP12	0.00142542	0.249029	0.381749	-1.17044	0.813697	0.305267	0.00142542
ARHGAP15	-8.21345	-8.60385	-8.18316	-2.58527	-8.41516	-8.38133	-8.21345
ARHGAP17	-4.59503	-5.68636	-6.43403	-1.2887	-7.8498	-4.22078	-4.59503
ARHGAP18	-5.4104	-5.98069	-5.19316	-1.97874	-5.97112	-5.17639	-5.4104
ARHGAP21	-0.269017	0.0385252	0.186869	-0.353712	-0.483145	0.105804	-0.269017
ARHGAP26	-4.02292	-4.48368	-3.61005	-2.59231	-2.99982	-3.89999	-4.02292
ARHGAP30	-7.84348	-8.24461	-6.9654	-1.99706	-9.2279	-8.22466	-7.84348
ARHGAP32	-1.2625	-1.19586	-0.28232	-3.06585	0.700226	-0.721156	-1.2625
ARHGAP35	2.0974	2.1982	2.95586	0.302452	2.93	2.48852	2.0974
ARHGAP5	2.18114	2.88781	2.20907	0.565612	5.79386	2.0627	2.18114
ARHGAP9	-7.19453	-8.21446	-7.20404	-2.163	-8.76615	-7.48493	-7.19453
ARHGDIA	-4.05724	-4.204	-5.45644	-0.940515	-4.68344	-3.75148	-4.05724
ARHGDIB	-8.8948	-9.13748	-8.91187	-3.01835	-7.71628	-8.71216	-8.8948
ARHGEF1	-4.50427	-5.3181	-5.04288	-0.832565	-6.25561	-4.76685	-4.50427
ARHGEF10	-3.59458	-3.4861	-1.15807	-0.913882	-4.50982	-3.39692	-3.59458
ARHGEF16	-0.634414	-0.363772	1.7518	-3.28485	1.53272	-0.665416	-0.634414
ARHGEF17	-3.33897	-3.32676	-4.63014	-0.0423187	-4.38011	-2.68027	-3.33897
ARHGEF18	-3.84601	-4.63036	-3.68927	-1.39896	-5.048	-4.00693	-3.84601
ARHGEF2	1.33341	0.648965	-1.98865	1.56181	0.693609	1.16923	1.33341
ARHGEF37	-2.82943	-3.23308	-2.60764	-2.88145	-2.47788	-2.15211	-2.82943
ARHGEF40	-1.29713	-1.38958	-1.27112	0.0363478	-1.57327	-0.561812	-1.29713
ARHGEF5	2.48461	2.7227	0.871343	-0.208516	2.13442	2.6104	2.48461
ARHGEF7	-2.33743	-3.05044	-4.8801	0.0384991	-4.32506	-1.90105	-2.33743
ARID2	3.59955	3.32978	2.55157	1.19988	3.47737	3.1234	3.59955
ARID3A	0.876453	0.948347	1.11459	2.14957	-1.38848	0.263656	0.876453
ARIH2	1.08586	0.751355	1.65307	1.72147	-2.10668	0.659381	1.08586
ARL1	1.60331	1.60312	1.53147	-0.241969	1.22786	1.71231	1.60331
ARL14EP	2.52082	2.57095	2.50909	2.72902	2.11896	2.40604	2.52082
ARL15	-1.18256	-1.11065	-0.656944	-1.31159	0.841728	-0.869275	-1.18256
ARL2BP	-1.51158	-0.117932	-0.146638	0.940817	-0.676489	-1.28466	-1.51158
ARL3	-2.59377	-1.94713	-0.712019	-1.97247	-1.16209	-2.17983	-2.59377
ARL5B	1.88331	1.87276	1.66012	1.15403	1.74366	1.22747	1.88331
ARL6	-0.356325	-1.01452	-1.52395	-1.29366	0.100967	0.00638711	-0.356325
ARL6IP5	-4.40188	-5.0679	-4.29538	-4.19261	-5.17435	-4.05417	-4.40188
ARL6IP6	-0.156384	-0.240867	-0.242137	-0.0416045	0.0931949	0.0159598	-0.156384
ARL8A	1.24818	1.1995	-0.0975149	1.98964	0.812289	1.67325	1.24818
ARL8B	1.7307	1.03768	1.67872	0.666308	0.69183	2.15306	1.7307
ARMC1	5.72055	5.14145	2.04913	4.15756	4.71178	6.01405	5.72055
ARMC10	4.53996	4.82326	1.53619	2.29828	4.1263	4.92278	NA
ARMC6	1.89283	2.43964	1.24086	2.99247	1.63473	1.49452	1.89283
ARPC2	-6.50756	-6.89975	-6.71268	-1.60472	-7.33201	-6.42194	-6.50756
ARPC3	-4.61473	-4.52883	-4.54398	-0.270199	-7.35467	-4.50343	-4.61473
ARPC5	-4.82303	-5.53659	-4.54732	0.383157	-7.26792	-4.71887	-4.82303
ARPC5L	-5.43026	-5.15968	-4.88661	-2.43458	-6.2314	-5.34493	-5.43026
ARPP19	-3.18768	-2.99968	-0.885357	-3.15421	-2.39279	-3.06774	-3.18768
ARRB1	-0.99756	-1.40285	-2.15623	0.359867	-0.511434	-0.728114	-0.99756
ARRB2	-4.20458	-4.53234	-3.07832	-0.201146	-5.08796	-4.39452	-4.20458
ARRDC1	-1.44388	-1.64824	-0.720544	-1.38126	-1.71239	-1.31423	-1.44388
ARSA	-0.256059	0.237868	1.12085	-0.886815	1.24805	0.180536	-0.256059
ARSB	-2.52403	-2.14926	-1.98079	0.563422	-1.82614	-2.39342	-2.52403
ARVCF	-0.520478	0.0323028	0.932445	-2.48307	0.135001	-0.091858	-0.520478
ASAH1	-1.89541	-1.3692	-0.68817	-2.0302	0.321688	-1.47216	-1.89541
ASAP1	-2.39664	-2.97609	-5.73296	2.04077	-4.82918	-2.52543	-2.39664
ASCC1	-1.61078	-1.60629	-0.506334	-1.62431	-2.09196	-1.73161	-1.61078
ASCC2	-3.75247	-3.11792	-2.68363	-1.9389	-3.00448	-3.97765	-3.75247
ASCC3	-2.99434	-2.82074	-2.237	-2.30898	-3.14012	-3.33884	-2.99434
ASF1A	2.24862	2.53458	3.26323	1.11303	2.26635	1.5283	2.24862
ASH2L	6.63608	6.77595	6.31398	4.2788	5.02339	6.53341	6.63608
ASNA1	-0.819171	-1.1455	-2.14704	-1.78612	-1.94299	-0.615565	-0.819171
ASPH	-0.605455	-1.02537	-1.68581	-0.80638	1.0921	-0.553337	-0.605455
ASPN	-3.7348	-4.42721	-3.54535	0.199942	-3.15422	-3.20929	-3.7348
ASPSCR1	4.22415	3.93007	2.28573	3.23779	3.04788	4.22068	4.22415
ASRGL1	-0.311454	-1.2296	-0.250131	-1.17678	-0.0636887	-0.0730034	-0.311454
ATAD1	4.61023	4.73324	6.93595	1.99285	4.08708	4.70174	NA
ATAD2	7.75865	7.35425	3.08906	5.99355	6.43686	7.06027	7.75865
ATE1	-4.13047	-4.04236	-2.0175	-4.67332	-3.10506	-3.68724	-4.13047
ATF1	-0.699663	-0.0324145	-1.113	-0.381168	-0.357973	-0.881372	-0.699663
ATF7IP	4.07511	4.38168	3.26873	3.00949	2.69318	3.71603	4.07511
ATG12	-3.74909	-3.76112	-3.25169	-1.97469	-4.37233	-3.51501	-3.74909
ATG16L1	-4.35759	-4.62996	-4.45283	-3.91931	-4.8595	-4.12591	-4.35759
ATG3	-4.44007	-4.85099	-5.89473	-2.07296	-5.3298	-4.81945	-4.44007
ATG4B	1.87689	2.03312	2.46569	1.27304	1.674	1.47304	1.87689
ATG5	-4.4176	-4.80203	-3.78364	-3.36278	-5.4798	-4.17384	-4.4176
ATG7	-4.11121	-6.1504	-4.45794	-2.29692	-7.06686	-3.98456	-4.11121
ATG9A	0.432912	0.93766	0.212141	-0.639756	1.09252	0.0210664	0.432912
ATIC	-0.132099	0.309963	0.126505	-0.893144	-1.68534	-0.104988	NA
ATL1	-1.09244	-0.645324	-0.950572	-0.0935669	1.82342	-1.13709	-1.09244
ATL2	3.56567	3.37856	3.13278	2.25574	4.31436	3.2671	3.56567
ATL3	-2.65627	-3.38508	-2.63915	-1.82886	-1.36098	-2.50439	-2.65627
ATOX1	-1.52555	-1.17128	-1.19039	0.213114	-2.0286	-1.39665	-1.52555
ATP11B	0.482898	0.504543	-1.27694	-0.148579	1.8559	0.556019	0.482898
ATP13A1	1.22513	0.452401	0.674903	0.827042	1.0302	1.13513	1.22513
ATP1A1	4.00682	3.72031	4.25043	0.215142	5.30307	4.12151	4.00682
ATP1B1	3.06683	2.873	2.84491	-0.441371	5.28146	3.37172	3.06683
ATP1B3	2.63242	2.56711	1.75723	2.81217	0.93526	2.20941	2.63242
ATP2A2	2.16501	1.5568	1.99875	0.665287	2.49025	1.92017	2.16501
ATP2B1	2.59674	2.40295	1.70386	0.743357	3.21181	2.39009	2.59674
ATP2B4	2.29869	1.04662	1.06742	0.570881	1.24447	2.44509	2.29869
ATP2C1	2.72747	2.1871	1.28039	0.455166	3.5108	2.6033	2.72747
ATP6V0A2	-0.0628297	0.495575	-0.125354	-0.343247	1.56317	-0.44145	-0.0628297
ATP6V0D1	-0.577736	0.572798	0.258386	-0.245989	0.0542541	-0.573485	-0.577736
ATP6V1A	-2.36377	-1.97981	-2.98913	-0.966712	-1.59717	-2.42203	-2.36377
ATP6V1B2	-6.34378	-5.15083	-3.87477	-2.11813	-4.13441	-6.44914	-6.34378
ATP6V1C1	2.18312	1.72667	-2.89815	2.10889	-0.313696	1.94063	2.18312
ATP6V1D	-2.24446	-2.62955	-1.78789	-2.08279	-1.07655	-2.16026	-2.24446
ATP6V1E1	-3.73365	-3.09627	-3.14589	-1.99686	-1.94238	-3.79285	-3.73365
ATP6V1F	-1.57776	-1.36457	-1.82825	-0.296784	-1.10567	-1.64136	-1.57776
ATP6V1G1	-1.18194	-0.722953	-1.22777	0.0199898	-1.23374	-1.21964	-1.18194
ATP6V1H	-1.66326	-1.46916	-2.42936	-0.904228	-0.87342	-1.61394	-1.66326
ATP9A	5.81112	4.98068	3.33013	2.98528	4.40642	6.2675	5.81112
ATPAF2	4.15672	4.62523	5.69343	1.31249	3.99672	4.19212	NA
ATRAID	1.16404	0.97165	0.662714	0.028043	1.79042	1.134	1.16404
ATRN	-1.87474	-2.05897	-2.95926	-0.790642	-0.439322	-1.58009	-1.87474
ATXN10	0.338344	1.46452	3.93368	0.297053	0.727957	-0.0029521	0.338344
ATXN2	0.649892	1.13355	0.297453	-0.189795	1.19816	0.498227	NA
ATXN2L	3.51963	4.13793	2.20331	2.60589	3.11029	3.13352	3.51963
ATXN3	-0.855826	-0.332075	0.37711	-0.852054	1.63444	-0.813895	-0.855826
ATXN7L3B	5.12361	4.95851	4.15605	4.05345	4.05512	4.89353	5.12361
AUH	-0.621818	-0.725932	0.810571	-1.57915	-1.64237	-0.172857	NA
AUP1	2.00032	1.12264	1.02862	-0.0611835	1.47012	1.70991	2.00032
AVEN	-3.9683	-4.27177	-2.39464	-2.64333	-4.5047	-4.0701	-3.9683
AVL9	4.46304	4.47444	0.946014	1.98274	3.6831	4.09652	4.46304
B2M	-5.09771	-5.17999	-3.87361	-1.2863	-6.09451	-5.15998	-5.09771
B3GAT3	1.90207	2.84338	1.8312	0.937934	2.54378	1.94471	1.90207
B4GALT3	0.598147	1.02921	-0.179347	-0.480697	1.93476	0.556124	0.598147
B4GALT4	-0.0796595	0.188009	-0.236071	-1.38387	0.915369	-0.234928	-0.0796595
B4GALT7	1.13368	2.40762	1.51351	1.51863	3.02494	0.737158	1.13368
BAD	1.63954	1.58819	1.45306	0.298969	2.21924	2.0361	NA
BAG1	-2.37549	-2.84061	-2.0772	-4.19728	-2.18082	-1.97196	-2.37549
BAG3	-0.857731	-1.18224	0.776782	0.0266684	-2.44612	-0.565195	-0.857731
BAG4	3.07179	2.84901	1.77367	1.06393	2.24235	2.94205	3.07179
BAG5	0.438656	1.03412	1.55567	-1.64324	2.14555	0.479012	0.438656
BAIAP2	1.7805	1.37957	0.431352	-0.186966	1.37666	1.8909	1.7805
BAIAP2L1	2.35889	2.65738	0.171516	-0.242831	2.28742	2.06425	2.35889
BAK1	-1.09612	-0.750917	-1.61633	-0.729073	-0.721943	-1.21857	NA
BANF1	2.90313	3.46627	2.5578	2.51446	2.73509	3.6815	2.90313
BASP1	-3.38698	-4.36761	-3.18673	-0.977235	-2.84282	-3.43445	-3.38698
BAX	-2.45446	-2.32142	-2.26707	-0.484547	-2.85276	-2.46652	NA
BAZ1A	2.76165	2.85772	2.88794	2.52921	3.76301	1.65047	2.76165
BAZ1B	4.59553	4.16971	2.73271	3.34697	4.36941	4.09616	4.59553
BCAM	3.01035	3.70949	2.94029	1.7349	3.74194	3.31393	3.01035
BCAS3	-0.574504	-0.851686	-2.29457	0.317149	-0.977775	-0.0372245	-0.574504
BCAT1	1.45093	0.775356	1.26032	2.58926	0.262127	1.50869	1.45093
BCAT2	1.54134	1.40209	1.84115	-0.479933	2.0516	1.78276	NA
BCCIP	1.6381	1.88558	2.54939	0.698958	0.731921	1.25821	1.6381
BCKDHA	2.12943	2.2741	1.98048	-0.778152	2.33656	2.67644	NA
BCKDHB	1.16409	1.14995	1.3474	-1.49765	1.66213	1.83897	NA
BCKDK	4.07189	3.86476	1.79898	2.72793	2.47901	4.2411	NA
BCL10	-3.19776	-3.19165	-1.57437	-1.435	-3.60338	-3.64208	-3.19776
BCL2L1	6.02317	4.98464	2.57621	4.11125	1.33633	6.22098	NA
BCL2L13	0.169774	0.3659	2.95741	-1.86035	0.502398	0.454283	NA
BCLAF1	1.65713	2.08371	1.75605	1.05429	1.39879	1.4886	1.65713
BCS1L	4.02545	3.77433	4.35173	1.9741	3.47248	3.9484	NA
BDH1	3.01679	3.39078	1.89768	-0.1327	3.81541	3.17957	NA
BECN1	-2.08366	-2.36186	-2.14207	0.505902	-3.95674	-2.2167	-2.08366
BET1	2.54773	2.39805	0.669118	0.931327	2.40714	2.52447	2.54773
BET1L	-1.61776	-1.4442	-0.465834	-2.59556	-0.0168267	-1.43206	-1.61776
BICD2	-1.64276	-1.85726	-0.344269	0.543975	-3.06801	-1.89613	-1.64276
BID	-0.736024	-0.123526	0.825442	0.540446	-0.884309	-1.18982	NA
BIN2	-6.38213	-7.46124	-6.54406	-1.42773	-7.5476	-6.79291	-6.38213
BIN3	-3.91075	-2.97849	-2.17355	-3.12402	-1.54483	-3.42058	-3.91075
BIRC2	-1.62917	-1.51445	-1.54027	-1.75735	-0.805277	-1.6124	-1.62917
BLMH	-1.79752	-1.26835	-1.79106	0.644394	0.669363	-1.89008	-1.79752
BLNK	-6.8325	-7.01318	-6.51559	-3.68151	-6.79831	-6.43049	-6.8325
BLOC1S2	-2.98975	-2.84375	-1.94678	-1.73935	-2.55812	-2.62933	-2.98975
BLOC1S3	-1.50856	-2.01406	-1.4986	-0.206767	-2.05397	-1.169	-1.50856
BLOC1S4	-3.70477	-4.02492	-2.71195	-2.2023	-4.0106	-3.3947	-3.70477
BLOC1S6	-1.1525	-1.0036	-0.101962	0.105078	-1.2926	-0.861595	-1.1525
BLVRA	-0.832616	-0.223152	-2.98328	0.66781	2.50274	-0.750869	-0.832616
BLVRB	-1.60209	-1.25141	-1.99445	-0.819786	-1.05189	-1.35159	-1.60209
BMP2K	-5.39939	-5.90393	-4.28304	-1.75249	-5.24433	-5.32523	-5.39939
BMS1	4.54146	4.39737	5.14782	2.03339	4.20652	4.03272	4.54146
BNIP1	0.698989	0.363019	1.32116	0.187952	1.92551	0.532625	0.698989
BNIP2	-2.45815	-1.81534	-1.35307	-0.124263	-1.96513	-2.3309	-2.45815
BOD1	4.1129	4.93347	5.13409	3.70366	3.74587	4.4711	4.1129
BOD1L1	0.809777	0.690856	2.88327	1.20488	-1.42663	0.680924	0.809777
BOK	-3.2276	-3.16578	-3.10222	-3.12029	-0.479981	-2.77629	-3.2276
BOLA1	4.34303	3.83669	1.81529	1.8797	3.35662	4.12416	NA
BOLA3	4.80549	5.2552	4.19463	3.6437	4.47415	4.33482	NA
BPGM	-1.9427	-2.44158	-2.22398	-1.84826	-1.56883	-1.76722	-1.9427
BPHL	4.41228	4.67813	3.70527	1.79846	3.70464	4.66925	NA
BPNT1	0.798675	0.179166	-1.81871	-1.34445	1.33176	1.33344	0.798675
BPTF	3.40865	3.55097	2.53686	1.55205	4.1289	3.05488	3.40865
BRAT1	2.54882	2.36591	0.413535	0.341762	1.64425	2.09386	2.54882
BRD3	2.90542	2.94137	4.2952	2.56101	1.40968	2.8947	2.90542
BRD7	3.41145	3.92849	3.45226	2.42806	2.92173	3.13547	3.41145
BRD9	1.72895	1.77808	-0.304389	1.73047	2.30856	1.74995	1.72895
BRF1	2.27286	2.39659	1.93736	1.23797	2.9029	2.01782	2.27286
BRI3BP	-0.564921	-0.654254	-0.659321	-1.52326	-0.107795	-0.898364	-0.564921
BRIX1	4.01602	4.02208	2.16041	2.11865	3.50786	3.44677	4.01602
BRK1	-3.02219	-4.09257	-3.00484	-2.0822	-4.12823	-2.9094	-3.02219
BRMS1	-1.08778	-1.29348	-1.35667	-1.74395	-2.53659	-1.26481	-1.08778
BROX	3.64943	3.39562	0.152503	1.26232	2.54681	3.95471	3.64943
BRPF1	0.952962	0.760827	1.10012	0.105351	-0.0667177	0.708197	0.952962
BSG	0.0692376	-0.352385	0.106803	-1.23258	0.323535	-0.306083	0.0692376
BSPRY	-2.36964	-2.56861	-1.42016	-4.5688	-0.87528	-2.13784	-2.36964
BTAF1	0.411383	0.813944	3.57809	-0.541529	0.692568	-0.326556	0.411383
BTD	-3.9817	-4.76629	-4.07463	-2.90257	-4.6096	-3.43289	-3.9817
BTF3	-1.56656	-1.00856	-0.531209	-2.66127	-1.61303	-1.82273	-1.56656
BTF3L4	1.71533	1.5099	3.50483	0.85706	1.14416	1.6007	1.71533
BUD13	0.290078	0.941647	1.49685	-0.0502375	1.31174	-0.437832	0.290078
BUD31	5.02814	5.31443	2.54301	3.68642	5.18823	4.629	5.02814
BYSL	4.57095	4.41045	3.93716	2.3428	5.22781	4.01684	4.57095
BZW1	0.0366231	-0.430176	-0.213607	-1.00956	-1.45366	-0.485454	0.0366231
BZW2	6.10159	6.53712	3.25702	3.71669	5.07359	5.67754	6.10159
C11orf54	-1.34393	-0.726851	-0.939227	-1.52859	-0.568829	-0.660031	-1.34393
C11orf58	0.378244	0.527121	0.718342	-0.548376	0.966304	0.482721	0.378244
C11orf96	-3.10388	-3.59686	-3.09405	0.523856	-2.72586	-2.55326	-3.10388
C12orf29	-0.370065	-0.55156	-1.26496	-1.15205	-0.93324	-1.00178	-0.370065
C12orf4	-5.35499	-5.41897	-5.73399	-3.67535	-3.01102	-4.65385	-5.35499
C12orf45	1.51483	1.78807	1.07668	0.872704	1.08658	0.965821	1.51483
C12orf57	0.947862	0.846152	-0.138078	0.146375	1.11146	1.14591	0.947862
C12orf75	-2.11253	-2.04723	-2.18146	-1.45079	-2.24986	-1.92177	-2.11253
C15orf40	-2.04173	-2.07903	-0.190956	-2.86537	-0.194536	-1.72782	NA
C16orf58	2.49769	2.44099	1.15046	1.34228	3.17533	2.83959	2.49769
C16orf70	-0.761064	-0.744295	-0.254055	0.730568	-1.5002	-0.389174	-0.761064
C17orf75	5.33	6.26812	5.92239	3.09123	5.597	5.29774	5.33
C19orf12	0.0860322	-0.795271	-1.90724	0.620183	-0.526217	0.349892	0.0860322
C19orf25	-4.3609	-4.09152	-3.45001	-2.2076	-2.44061	-4.17077	-4.3609
C19orf66	-4.40751	-4.59538	-4.76551	-0.723915	-3.87391	-4.04796	-4.40751
C1D	-0.288214	-0.50089	-0.475816	-0.472856	-0.761313	-0.741199	-0.288214
C1orf116	1.46524	1.03466	0.21268	-0.580087	1.49523	2.00534	1.46524
C1orf122	2.66068	2.76329	3.20141	1.22006	1.73421	2.10439	2.66068
C1orf131	1.66518	1.37364	0.541341	0.162453	0.439963	1.05531	1.66518
C1orf174	-2.05966	-2.15228	-0.606249	-2.40294	-2.39062	-1.98776	-2.05966
C1orf198	0.862102	1.04571	-0.488073	3.21852	-0.204583	1.2028	0.862102
C1orf21	-0.753432	-1.85049	-3.28487	-2.3492	-0.683916	-0.248596	-0.753432
C1orf35	8.30601	7.99649	5.46088	5.05815	6.53079	7.98359	8.30601
C1orf50	-0.866843	-0.326127	-0.280039	-0.764151	0.38252	-0.958922	-0.866843
C1QB	-3.95963	-3.66243	-3.88007	-0.486311	-2.63099	-4.48042	-3.95963
C1QBP	2.44203	3.41448	7.1965	-0.566915	3.25833	2.17896	NA
C1RL	-3.78978	-3.89647	-4.21957	-2.12998	-2.06447	-3.48958	-3.78978
C1S	-3.80278	-3.66438	-3.88496	0.415693	-2.99984	-3.74703	-3.80278
C20orf27	2.13857	1.36097	-0.525809	3.50793	-0.509417	1.93265	2.13857
C2CD5	0.547597	-0.0396095	-1.73994	-1.48541	0.5672	0.69777	0.547597
C2orf49	0.408543	0.565076	0.106378	-0.0613855	0.729277	0.188447	0.408543
C2orf69	3.40665	3.88061	3.12289	1.0886	2.94121	2.75433	NA
C2orf76	-0.685933	0.177874	-0.610261	-0.831886	-0.590121	-0.482731	-0.685933
C4BPB	-2.35841	-3.04362	-2.19421	-1.12388	-1.53585	-2.5275	-2.35841
C4orf33	-0.861032	-0.721943	-0.172837	-1.26972	-0.114794	-0.568317	-0.861032
C5	-4.11528	-3.96707	-4.01794	-1.30852	-2.44941	-4.23228	-4.11528
C5orf15	0.537679	1.01238	1.14664	1.01967	1.54292	0.185483	0.537679
C5orf51	3.78964	3.63621	0.42468	2.50184	3.76536	3.49251	3.78964
C6orf132	0.819323	0.710188	0.0346023	-1.10768	0.0488821	0.854875	0.819323
C6orf203	3.49965	3.72846	5.34954	2.46509	1.69118	3.68465	NA
C6orf89	2.20492	2.38031	2.10072	1.09711	2.02967	2.19465	2.20492
C7	-4.96704	-5.39005	-5.01253	-2.74553	-3.22839	-4.68439	-4.96704
C7orf26	0.15511	0.0238742	0.430997	-0.123948	-0.0878845	-0.110173	0.15511
C8orf33	5.88933	4.48942	0.93382	3.4957	1.33615	5.82924	5.88933
C9orf64	-2.34867	-2.4486	-1.4842	-1.90439	-1.42156	-2.30981	-2.34867
C9orf78	0.816549	0.519708	2.49689	0.209876	-0.0665405	0.185152	0.816549
CA12	-1.667	-1.69568	-0.741266	-3.98692	-0.565363	-1.56276	-1.667
CA2	-2.78175	-2.954	-2.99392	-3.86301	-1.96819	-2.63106	-2.78175
CA8	-0.191232	-0.626589	-1.21569	-1.79524	0.232934	0.00294251	-0.191232
CAAP1	0.55484	0.433335	1.43164	-0.850869	0.229429	0.21379	0.55484
CAB39	-4.43514	-4.62531	-4.15485	-2.47833	-6.1432	-4.15677	-4.43514
CAB39L	0.986565	0.616945	0.59984	0.951027	0.183888	1.74336	0.986565
CACNA2D1	-3.28484	-3.4851	-3.148	0.216345	-2.8538	-3.13344	-3.28484
CACTIN	1.67652	2.28404	3.3511	1.69641	-0.437114	1.22477	1.67652
CACUL1	1.05193	1.66827	3.32927	0.519634	1.20521	0.659103	1.05193
CACYBP	5.34151	5.05381	3.05993	2.80508	3.80843	4.78854	5.34151
CAD	3.88296	4.30583	2.50341	2.80538	4.35668	3.25584	3.88296
CADM1	-0.851843	-0.763734	-0.251151	-1.41083	1.35382	-0.341646	-0.851843
CALCOCO1	-0.413212	-0.549951	-0.820205	0.59246	-0.752629	-0.268398	-0.413212
CALCOCO2	0.121049	-0.252441	-0.475501	0.696745	-0.62452	0.266196	0.121049
CALD1	-3.5643	-3.73438	-3.41944	0.900334	-4.17296	-3.18435	-3.5643
CALR	-1.11561	-0.767729	-1.97176	0.568531	-1.05733	-1.30132	-1.11561
CALU	0.262435	0.0987867	-1.21395	2.23535	-0.687996	0.169796	0.262435
CAMK1	-4.76892	-4.93011	-4.78124	-1.74037	-4.73159	-4.61696	-4.76892
CAMK2D	-1.59234	-1.66111	0.438337	0.193218	-1.25916	-1.04176	-1.59234
CAMK2G	-1.64989	-1.19348	-0.696706	0.418271	-1.57042	-1.49728	-1.64989
CAMKMT	-0.971971	-0.866109	-1.1318	-0.965441	1.42781	-1.2963	-0.971971
CAMLG	0.804095	0.491149	2.05076	-0.0443347	1.34201	0.941706	0.804095
CAMSAP3	4.87225	5.3662	5.57793	0.494628	5.17078	4.85989	4.87225
CAND1	2.54303	2.3285	0.366829	1.76557	2.43367	2.42086	2.54303
CANT1	-0.37471	0.165291	-1.6152	-2.13525	0.537368	-0.439428	-0.37471
CANX	2.34296	2.49009	3.24967	1.82987	2.78515	2.19989	2.34296
CAP2	-2.63847	-3.62803	-2.70752	-0.548556	-3.57951	-2.10729	-2.63847
CAPG	-3.00088	-2.3565	-3.48779	0.932736	-3.37933	-2.89564	-3.00088
CAPN1	-2.77885	-3.01285	-3.16481	-2.58439	-2.48102	-2.30723	-2.77885
CAPN15	-1.22203	-1.83809	-2.65472	-2.052	-3.01561	-1.13647	-1.22203
CAPN2	-3.20306	-3.66923	-4.03592	-1.96391	-1.45774	-2.5922	-3.20306
CAPNS1	-3.57691	-3.95257	-3.94748	-2.54497	-2.00793	-2.9891	-3.57691
CAPRIN1	3.10827	3.17755	2.58768	0.693397	2.84732	2.63859	3.10827
CAPZA2	-3.9725	-4.70082	-5.44303	-0.425997	-4.3564	-3.48174	-3.9725
CARHSP1	0.139144	0.411686	-1.4411	0.681259	-1.997	-0.124473	0.139144
CARM1	2.59309	2.61905	1.97646	3.1788	0.361194	2.21663	2.59309
CARS	-4.14957	-3.69284	-2.6659	-2.23169	-3.77657	-4.37705	-4.14957
CARS2	3.07485	2.90925	1.57544	1.42027	0.519208	2.93981	NA
CASC3	1.21461	1.76472	0.865753	0.482418	2.13158	0.541719	1.21461
CASC4	-4.11035	-4.06001	-2.07768	-4.28929	-1.10831	-3.96415	-4.11035
CASKIN2	-0.558982	-0.952774	-1.84373	0.697194	-1.4515	-0.0851971	-0.558982
CASP1	-6.85603	-7.46439	-6.86039	-2.88573	-7.49173	-6.92356	-6.85603
CASP10	-3.71378	-4.55689	-3.9933	-1.28517	-5.41421	-3.84043	-3.71378
CASP3	-2.9177	-2.52182	-0.107885	-1.40816	-3.1437	-3.65756	-2.9177
CASP4	-6.85144	-7.0899	-6.66697	-3.12757	-5.82832	-7.41933	-6.85144
CASP7	-2.51181	-2.58219	-1.09807	-1.00798	-2.19066	-2.55316	-2.51181
CASP9	-2.58493	-2.79683	-0.730574	-2.80782	-1.72717	-2.69916	-2.58493
CAST	2.2751	1.76308	3.4229	1.38222	-0.0673234	2.51431	2.2751
CAT	-1.23253	-1.76585	-1.83159	-0.804106	-0.758591	-1.08353	NA
CAV1	-3.55499	-3.66619	-3.45255	-1.11848	-2.67359	-3.15716	-3.55499
CBFB	-1.63058	-0.68853	-0.397978	0.316018	-0.509694	-2.09623	-1.63058
CBL	-4.46984	-4.4724	-3.51693	-0.249701	-6.44613	-4.79042	-4.46984
CBLB	-2.97212	-2.95804	-4.01164	-2.02074	-4.03159	-3.31789	-2.97212
CBLL1	2.8916	2.88836	1.61291	2.33405	2.90614	2.65174	2.8916
CBR3	-2.70901	-3.29379	-1.8242	-1.67269	-1.12377	-2.44481	NA
CBR4	1.44528	1.48637	3.03239	-0.610183	1.90402	1.985	NA
CBX1	2.65041	2.59719	2.17102	2.67346	2.26574	2.75618	2.65041
CBX3	3.86291	4.22596	2.56268	2.77006	3.68381	3.46319	3.86291
CBX8	7.11256	7.25502	5.63535	4.11683	6.06307	7.1165	7.11256
CC2D1A	1.82119	1.43684	0.0531932	-0.447441	0.708835	1.91551	1.82119
CC2D1B	-3.09712	-2.55093	-1.08632	-0.736387	-2.09962	-2.98501	-3.09712
CCDC115	1.07754	1.17879	1.04751	1.58236	0.235919	0.869973	1.07754
CCDC117	2.83505	2.83228	3.81745	1.76261	2.24947	2.41068	2.83505
CCDC12	2.21953	2.05857	2.18845	0.134586	0.94925	2.12173	2.21953
CCDC124	0.979914	1.13855	-0.748058	0.965374	-0.683908	0.86691	0.979914
CCDC127	0.96571	0.676161	-1.77442	-0.91036	1.90295	1.33822	NA
CCDC137	1.04	1.09646	0.216067	0.843061	1.78303	0.501489	1.04
CCDC25	-3.44825	-2.33658	-0.894439	-2.48456	-2.32541	-3.41099	-3.44825
CCDC28A	-2.90187	-2.69729	-2.3366	-3.19941	-2.26021	-2.35648	-2.90187
CCDC43	2.69216	3.36746	3.0599	2.8941	2.93386	2.27417	2.69216
CCDC47	3.59819	3.22292	2.52776	1.06162	3.88717	3.45392	3.59819
CCDC50	-4.79022	-5.49953	-5.44816	-0.866105	-6.29915	-4.51966	-4.79022
CCDC51	3.58855	3.85121	3.82286	0.744719	2.30048	3.42719	NA
CCDC58	6.37735	6.07393	5.00751	3.07524	3.53496	6.24817	NA
CCDC6	-1.3486	-0.644245	0.503555	-2.04523	-0.00175263	-1.64671	-1.3486
CCDC61	-4.30974	-4.46869	-4.27319	-3.75576	-5.04594	-3.76692	-4.30974
CCDC71L	0.258705	0.66772	-1.2393	1.29144	1.07221	-1.00405	0.258705
CCDC86	3.09985	3.29712	3.29982	1.66424	2.57828	2.65745	3.09985
CCDC88B	-4.29157	-5.66692	-4.34556	-1.76769	-7.74983	-4.57892	-4.29157
CCDC9	-3.97767	-3.86056	-3.60621	-2.46407	-4.61166	-3.78393	-3.97767
CCDC90B	1.68835	1.21177	1.36206	0.26327	1.56441	1.8225	NA
CCDC91	0.430455	-0.262003	-2.45113	-0.324201	0.472758	0.767168	0.430455
CCDC92	-2.17521	-1.54854	-2.50497	-0.602539	-1.22014	-1.50943	-2.17521
CCDC93	-4.28533	-4.38431	-4.3693	-1.85589	-3.3286	-3.77238	-4.28533
CCDC97	3.01186	2.5468	2.97955	2.77569	1.4381	2.40991	3.01186
CCL21	-4.8826	-5.1439	-4.88028	-2.01698	-4.90902	-4.8801	-4.8826
CCM2	-1.85089	-2.41318	-4.71842	0.103714	-1.0471	-2.25989	-1.85089
CCNB1	3.4769	3.80344	3.41009	2.40196	2.06725	1.81582	3.4769
CCNH	1.16641	2.21636	1.65529	1.55227	1.13616	0.399797	1.16641
CCNK	4.47571	4.75412	4.48534	3.07193	4.47038	3.96573	4.47571
CCNT1	3.51629	4.16381	3.00857	2.08689	3.80886	3.01718	3.51629
CCNT2	-0.208478	0.00366979	-0.0195394	-1.33461	0.365611	-0.0602725	-0.208478
CCNY	1.50543	1.36861	1.71928	0.560345	1.7603	1.52211	1.50543
CCS	-0.964282	-1.24442	-1.80449	-1.0999	0.592605	-0.703663	-0.964282
CCT3	1.00298	0.568797	-0.735889	-0.370522	-0.643359	0.485131	1.00298
CCT8	0.143213	-0.027781	1.24533	-1.09191	-0.345414	-0.592653	0.143213
CD109	-1.82843	-1.5583	-1.72795	-0.768954	-0.502053	-1.73283	-1.82843
CD14	-5.57998	-5.83092	-5.49456	-1.26708	-4.89557	-5.62913	-5.57998
CD151	-1.62603	-2.19143	-0.663516	-3.47064	-0.34341	-1.37667	-1.62603
CD163	-4.11009	-4.73027	-4.0744	-0.37589	-4.69982	-4.34182	-4.11009
CD180	-3.02979	-3.43152	-2.94902	0.217477	-2.79701	-3.38049	-3.02979
CD209	-4.83888	-5.89576	-4.7478	-1.57979	-5.96505	-4.74835	-4.83888
CD248	-5.2536	-5.22095	-5.19215	-1.61722	-5.01608	-5.06206	-5.2536
CD276	-0.851851	-0.981148	0.33484	-0.00116804	0.0712036	-1.2188	-0.851851
CD2AP	-1.76835	-2.03671	-3.40655	-2.38335	-2.01683	-1.8128	-1.76835
CD2BP2	5.50748	5.22629	3.46071	3.61433	3.37668	5.5456	5.50748
CD300A	-5.28236	-5.74848	-5.26104	-1.31295	-4.65363	-5.43515	-5.28236
CD34	-4.84308	-5.94693	-4.57896	-2.34564	-3.99886	-4.38729	-4.84308
CD36	-0.550924	-1.65749	-0.477271	0.426995	-0.749999	-0.325481	-0.550924
CD3E	-4.63349	-5.8452	-4.87087	-1.1257	-7.37403	-4.73274	-4.63349
CD4	-5.9443	-6.67118	-5.76184	-1.26042	-8.24304	-5.96588	-5.9443
CD44	-3.62959	-3.58788	-4.73251	-3.12826	-3.52673	-3.79534	-3.62959
CD46	1.84248	1.36781	0.305136	-0.906889	2.75949	1.82374	1.84248
CD47	0.828259	-0.173906	-0.417541	0.276212	-1.1767	0.882312	0.828259
CD48	-6.67663	-6.50692	-5.45524	-1.7331	-8.34353	-6.86493	-6.67663
CD5	-5.63966	-5.50193	-5.63024	-2.14022	-7.06675	-5.58244	-5.63966
CD55	0.14005	0.30776	-0.286865	0.973368	1.56007	0.27387	0.14005
CD58	-2.52598	-2.49458	-2.18595	-1.25787	-1.59538	-2.6461	-2.52598
CD63	0.11086	-0.154852	-0.302683	-0.694135	1.55754	0.446317	0.11086
CD74	-3.54992	-3.00832	-3.29724	-1.45291	-3.23615	-3.35074	-3.54992
CD82	-0.590486	-1.10563	-0.541521	-0.910764	-1.45411	-0.467988	-0.590486
CD8A	-5.969	-6.18783	-5.94424	-2.28147	-5.89346	-6.38786	-5.969
CD9	3.99359	4.05967	2.51989	0.991844	5.96525	4.38314	3.99359
CD93	-2.26143	-2.59463	-2.30035	-0.268566	-2.15363	-2.12792	-2.26143
CDA	-3.29014	-2.99343	-3.37537	-1.83314	-2.14166	-3.66516	-3.29014
CDC123	1.03001	0.518651	0.638063	1.35871	-3.03369	0.510268	1.03001
CDC26	-0.864948	-0.874288	-0.342579	0.0846013	-1.70657	-1.00267	-0.864948
CDC34	0.327092	0.822264	1.90666	1.0205	-0.195111	-0.57153	0.327092
CDC42	-2.06942	-1.6872	-0.540708	-1.16578	-0.217833	-1.79869	-2.06942
CDC42BPA	-0.350763	-0.441671	-1.88574	0.169975	-0.460461	0.0268238	-0.350763
CDC42BPB	-2.25215	-2.08648	-1.95245	-3.45898	0.585867	-1.91027	-2.25215
CDC42BPG	0.465812	0.723581	0.392839	-0.814321	0.329376	0.740947	0.465812
CDC42EP1	-4.49263	-4.57741	-3.79926	-1.00294	-4.82109	-4.16347	-4.49263
CDC42EP5	-3.13433	-3.18421	-3.19491	0.228772	-3.40023	-2.91419	-3.13433
CDC73	4.26676	3.34434	1.98044	0.730057	3.57866	3.78436	4.26676
CDCP1	-0.498035	-0.535858	-0.442204	-2.182	-0.523708	-1.07232	-0.498035
CDH1	4.14994	5.41888	5.26959	0.782352	5.37648	4.2369	4.14994
CDH11	-2.41576	-1.82225	-1.96281	1.2328	-0.853822	-2.14995	-2.41576
CDH13	-3.49932	-3.98899	-3.45107	-0.361223	-3.90215	-3.08679	-3.49932
CDH5	-3.12252	-4.63967	-3.45705	-1.16942	-3.67496	-2.46435	-3.12252
CDIPT	2.33182	2.07865	1.0754	1.51172	2.63276	2.64202	2.33182
CDK1	5.45399	5.65959	6.7584	4.0061	3.43898	5.30828	5.45399
CDK12	2.83623	3.36658	2.91143	1.99363	3.70868	2.11464	2.83623
CDK13	1.1279	1.76103	-1.62058	1.00884	4.71519	0.991092	1.1279
CDK18	-1.5714	-0.707239	-2.0639	-1.11325	-0.0564435	-1.42925	-1.5714
CDK2	4.29446	4.80989	3.93193	3.37245	2.64207	3.48953	4.29446
CDK4	2.65089	3.00131	0.123344	3.25615	1.89259	2.4184	2.65089
CDK5	2.73813	2.58834	0.550593	0.893688	1.65126	2.59638	2.73813
CDK5RAP1	3.65943	3.052	1.69617	0.941748	1.64318	3.42424	3.65943
CDK5RAP3	-2.92274	-3.69343	-2.97345	-2.32666	-3.96056	-2.65446	-2.92274
CDK7	2.73182	2.85849	3.30393	1.57199	1.7708	1.93414	2.73182
CDK9	4.13129	4.52711	4.36804	1.87878	5.85064	3.66898	4.13129
CDKAL1	3.64604	3.85111	2.24754	3.43504	3.82263	2.90804	3.64604
CDKN1B	-4.76671	-5.62037	-5.6771	-2.99843	-4.58454	-4.21301	-4.76671
CDKN2AIP	-2.23783	-1.98783	1.759	-2.15933	-1.60058	-1.86691	-2.23783
CDKN2AIPNL	1.92339	2.55961	2.02771	1.88606	1.13464	1.53924	1.92339
CDKN2C	-3.41457	-3.12442	-3.15784	1.5931	-4.19328	-3.10239	-3.41457
CDS2	0.625131	0.923033	-0.650524	0.69001	0.8568	0.686845	0.625131
CDV3	-0.389812	-0.608175	-2.85354	1.26369	-2.49458	-0.599216	-0.389812
CDYL	5.78664	5.29203	5.15632	3.66657	3.63886	5.07291	5.78664
CEBPZ	5.28513	5.45935	4.76001	3.04209	4.6293	4.7197	5.28513
CELF1	5.03792	5.90445	5.32624	2.81591	5.50126	4.52816	5.03792
CELF2	-3.93807	-4.88596	-3.81368	-0.858639	-3.88752	-3.6704	-3.93807
CENPB	5.56035	5.1823	3.78787	3.75955	3.78805	5.40536	5.56035
CENPC	-0.070782	-0.133697	0.838264	-0.49303	0.341732	-0.422261	-0.070782
CEP170	-0.927338	-1.08109	-1.6494	0.633731	0.659365	-1.2108	-0.927338
CEP170B	0.132777	0.076589	0.529701	-1.57672	0.61653	0.230775	0.132777
CEP41	1.09561	1.3631	-0.0523546	0.0776672	1.97627	1.07731	1.09561
CEP44	-0.779618	0.480024	2.38371	-0.381235	0.568967	-0.533749	-0.779618
CERS2	3.50254	3.31009	1.66926	1.29662	4.39913	3.3969	3.50254
CERS6	0.85801	0.936721	0.189636	-0.603066	1.2982	0.726626	0.85801
CES1	-0.122349	-0.268639	-0.0461207	1.86275	1.16011	0.231133	-0.122349
CES2	-2.48039	-1.68271	-1.81535	-1.84216	-1.08623	-2.35334	-2.48039
CETN3	0.735072	0.319053	2.06072	-0.626717	-0.879162	1.1525	0.735072
CFD	-4.39198	-4.32949	-4.1965	-1.65282	-3.36748	-3.97996	-4.39198
CFDP1	2.43419	4.24446	4.3385	2.98706	4.4743	2.3264	2.43419
CFL2	-1.89546	-2.6959	-1.79201	0.811152	-2.58067	-1.70395	-1.89546
CGGBP1	-0.742262	-1.59354	-0.588499	-0.527326	-4.16988	-0.540013	-0.742262
CGN	4.50943	4.53043	3.53513	1.58889	3.25075	4.56873	4.50943
CGREF1	-0.853293	-0.255968	-0.97546	-1.21502	0.862642	-1.10091	-0.853293
CHAF1B	4.42592	4.62594	4.91519	2.99917	2.39063	2.73491	4.42592
CHAMP1	2.03948	2.33027	1.12338	0.294688	2.05795	2.01304	2.03948
CHCHD1	1.00644	1.69762	1.57397	-0.0197614	2.21939	0.827279	NA
CHCHD4	3.6293	3.56618	3.4818	1.70005	0.278	3.53188	NA
CHCHD5	1.03085	1.38226	1.09263	0.474614	1.16718	1.39409	NA
CHCHD6	3.53158	3.82501	2.70536	1.43396	3.13701	3.94774	NA
CHCHD7	2.58547	2.35364	-0.149494	1.57415	0.288205	3.02342	NA
CHD1	1.14538	1.27054	2.45992	1.01689	-0.555333	0.289526	1.14538
CHD3	2.10174	1.76117	4.10633	0.381323	-0.564124	2.17921	2.10174
CHD8	4.1404	5.05153	4.69857	2.645	5.408	3.35691	4.1404
CHDH	1.3733	1.7945	1.37222	-0.336165	0.252943	1.92566	NA
CHEK2	2.95896	3.46027	4.73699	1.77534	2.74784	2.2257	2.95896
CHERP	5.67951	5.83602	4.99521	3.00613	3.27071	5.22833	5.67951
CHID1	-1.83819	-1.78126	-0.283762	-1.25498	-0.673042	-1.30804	-1.83819
CHL1	-1.14068	-0.917158	-1.14381	-1.1279	1.14956	-1.05684	-1.14068
CHMP1B	-1.80316	-0.898603	0.0310286	-2.12528	-0.109969	-1.66325	-1.80316
CHMP2A	-0.452428	-1.32679	-1.62236	-1.84557	-0.17864	-0.198344	-0.452428
CHMP2B	-3.33514	-4.24808	-3.23496	-3.30048	-4.4283	-3.09525	-3.33514
CHMP4B	3.06167	2.40404	-1.71218	2.30726	-0.156047	3.05915	3.06167
CHMP4C	3.85507	3.61615	1.89614	2.05712	2.81648	3.85409	3.85507
CHMP5	-1.7649	-1.56033	-1.30621	-0.803451	-1.37939	-1.70527	-1.7649
CHMP6	-2.02365	-2.28908	-4.36042	-0.357246	-1.19901	-1.82167	-2.02365
CHORDC1	0.391181	0.196816	0.824509	0.794745	-0.565864	-0.458594	0.391181
CHP1	-1.71249	-1.746	-1.24914	-2.90971	0.543762	-1.85581	-1.71249
CHRAC1	5.70732	4.90084	1.31206	4.27281	2.7914	5.22812	5.70732
CHTF18	2.59218	3.11711	2.35186	2.07179	2.30796	1.7242	2.59218
CHTOP	1.36427	1.13491	0.228707	-0.525993	0.511976	1.25058	1.36427
CHUK	-2.11279	-1.81054	0.256728	-1.60261	-0.924582	-2.57963	-2.11279
CIB1	-0.397832	-0.518678	-0.0391023	-2.01595	0.127936	0.0949433	-0.397832
CIR1	0.520099	0.729774	0.599999	-0.0346395	1.48618	-0.303552	0.520099
CISD1	1.24632	1.25896	2.59081	-0.474742	1.51144	1.61926	NA
CISD2	0.449302	0.5448	2.01244	0.373129	0.594625	0.0747281	NA
CIZ1	0.219554	0.663617	1.03858	1.17319	0.51695	0.272309	0.219554
CKAP4	-0.0946832	-0.407663	-0.565252	0.502729	0.843303	-0.369167	-0.0946832
CKAP5	1.92652	2.35563	2.66311	0.469424	1.72751	1.24252	1.92652
CKB	1.22478	0.762781	1.30825	0.461392	0.504813	1.60742	1.22478
CKS1B	5.73999	6.09624	3.59574	4.78681	4.12412	4.53181	5.73999
CLCC1	-0.239367	0.0467857	1.26549	-0.899263	0.68434	-0.184345	-0.239367
CLCN7	-0.685216	-0.156711	-0.845196	0.291436	0.156892	-0.54897	-0.685216
CLDN3	5.21027	5.32974	4.31982	3.55471	4.00161	5.24854	5.21027
CLDN7	0.829286	1.09333	1.79592	-1.63238	1.56528	0.755784	0.829286
CLDND1	1.51852	0.724868	1.12595	-0.99627	2.27481	1.33176	1.51852
CLEC11A	-0.692655	-0.325041	-0.59863	1.00793	0.177278	-0.12294	-0.692655
CLEC16A	-1.17594	-0.660393	-1.56561	-1.60242	-1.18016	-0.909932	-1.17594
CLIC4	-2.76598	-2.58623	-1.02005	1.70472	-2.83459	-2.56977	NA
CLIC5	-2.77945	-2.67892	-2.70099	-2.37714	-1.2846	-2.36799	-2.77945
CLINT1	0.158812	0.148487	1.01467	-1.0709	-0.188312	0.490426	0.158812
CLK3	-1.36854	-1.65773	-0.29102	-1.88538	-2.59067	-1.78576	-1.36854
CLMN	-1.49518	-1.49413	-1.22986	-3.21314	-1.18568	-1.26381	-1.49518
CLN5	-0.195082	-0.185533	-1.43434	-0.747684	-0.247213	0.363192	-0.195082
CLNS1A	4.35379	4.70555	2.81053	3.85886	1.43433	3.83019	4.35379
CLP1	3.68513	3.59904	3.58158	1.18273	2.12657	3.16482	3.68513
CLPB	5.566	5.90702	4.53778	3.62009	4.62234	5.19434	NA
CLPP	2.5451	3.21844	3.61989	1.13674	2.30394	2.31335	NA
CLPTM1	2.66979	1.99057	2.63705	1.52269	2.1463	2.32658	2.66979
CLPTM1L	1.26203	1.10719	-2.11498	0.888067	3.25001	1.20105	1.26203
CLPX	4.34915	4.91684	5.14502	0.910842	4.42472	3.82425	NA
CLU	-2.2973	-2.4815	-1.62262	-1.16386	-2.14319	-1.94924	-2.2973
CLUH	1.17056	2.38081	4.80508	-0.856143	1.38091	0.414857	1.17056
CLYBL	-0.508237	-0.652013	-1.69883	-1.77193	-2.01432	0.106584	NA
CMAS	3.42725	2.87954	0.815399	1.47485	1.65664	3.9402	3.42725
CMBL	-0.833857	-1.11602	-2.92885	-1.94236	0.565952	-0.557074	-0.833857
CMC1	5.43036	5.29725	5.56878	2.47827	2.5833	5.58665	NA
CMC2	1.2127	2.572	2.85241	1.09013	1.9683	1.12886	NA
CMIP	-1.27255	-0.00267403	0.0652074	-1.90421	-0.742564	-1.47423	-1.27255
CMPK1	-2.62077	-2.28705	-1.54051	-3.25683	-1.34195	-2.27601	-2.62077
CMPK2	-0.563293	-0.535118	-0.883048	2.30817	-1.86135	-0.764921	NA
CMTM4	1.31061	1.96758	2.07867	-0.778048	2.85281	1.45294	1.31061
CNBP	1.89048	2.12792	0.57803	1.49664	1.27993	1.86062	1.89048
CNDP2	-6.66948	-6.30251	-4.04343	-4.00638	-7.22625	-6.3422	-6.66948
CNN1	-4.33731	-4.08572	-4.29511	-0.32374	-4.28795	-3.90589	-4.33731
CNN2	-1.48514	-2.32172	-1.23669	2.55251	-2.7347	-1.31345	-1.48514
CNNM3	2.49238	2.25157	1.96519	-0.129708	3.61518	2.55075	2.49238
CNNM4	1.8242	2.18652	1.08271	-0.414485	2.49971	1.5665	1.8242
CNOT4	1.07557	0.259292	-0.211912	0.397026	-0.954526	0.982416	1.07557
CNOT7	0.379109	1.07964	2.56076	-1.08972	1.16092	0.010812	0.379109
CNP	-1.59945	-1.09968	-2.20261	-1.12243	0.0406917	-1.57711	-1.59945
CNPY4	-1.93187	-2.44488	-3.21062	0.399012	-2.19525	-1.43693	-1.93187
CNRIP1	-6.17389	-7.11955	-6.20249	-1.14964	-6.3828	-5.43317	-6.17389
COA3	4.32246	4.99527	4.67274	1.80857	4.50914	4.21162	NA
COA4	3.77612	3.53052	2.83033	2.44324	1.60699	3.94186	NA
COA5	1.39898	1.45657	1.16943	0.0401624	0.764465	2.03063	NA
COA6	2.69282	1.98493	-0.00178623	-0.19647	0.203717	2.95485	NA
COASY	0.83708	0.768893	0.84734	-0.460195	0.897372	1.01739	NA
COBL	-1.18722	-1.64982	-2.90253	-2.1618	-2.02642	-0.709379	-1.18722
COBLL1	-0.484527	-0.551214	-0.803022	-0.861055	1.8935	0.0770698	-0.484527
COG1	-0.0974654	-0.504762	-0.37709	-2.56908	-0.117575	0.25476	-0.0974654
COG2	0.0219552	-0.468183	-0.591607	-2.55252	0.169981	0.421728	0.0219552
COG4	-0.942152	-1.19604	-0.531655	-3.09553	-0.478616	-0.591252	-0.942152
COG5	0.601428	0.957098	-0.44344	-1.85663	1.46599	0.933375	0.601428
COG6	-0.325791	-0.168798	-0.943594	-1.22837	-0.0412986	-0.0444417	-0.325791
COG7	1.94311	1.21058	1.05104	-0.858494	1.14882	2.38854	1.94311
COIL	5.29349	5.43986	4.34526	3.63324	4.00542	4.89402	5.29349
COL12A1	0.165029	-0.156025	0.150257	1.78154	0.319034	0.0119646	0.165029
COL14A1	-7.33266	-6.31488	-5.47911	-2.83938	-5.43228	-6.93233	-7.33266
COL15A1	-5.61782	-5.40823	-5.16509	-0.52843	-4.69018	-5.39989	-5.61782
COL18A1	-3.62557	-3.3462	-3.35033	-1.66343	-2.006	-3.27235	-3.62557
COL1A2	-4.02632	-3.77699	-3.84836	0.183773	-3.07092	-3.72727	-4.02632
COL4A1	-3.63596	-3.66234	-3.71763	-1.09717	-2.41022	-3.471	-3.63596
COL4A2	-2.98044	-3.12559	-3.50237	-0.964608	-2.39879	-2.84112	-2.98044
COL4A3BP	-4.83726	-4.21643	-2.79373	-4.39209	-2.97747	-4.71403	-4.83726
COL5A1	-0.672069	-0.564027	-0.492678	1.9056	-0.0168311	-0.420902	-0.672069
COL5A2	-2.41507	-1.87409	-2.20334	1.38826	-1.35046	-2.35102	-2.41507
COL6A1	-5.24021	-5.26133	-4.75736	-1.24141	-3.90088	-4.77985	-5.24021
COL6A2	-5.19393	-5.71735	-4.74583	-1.03009	-4.24009	-4.72431	-5.19393
COL6A3	-5.48393	-5.33477	-5.48475	-0.848945	-4.16948	-5.18609	-5.48393
COLGALT1	1.12138	0.973138	0.139652	3.45745	-0.167194	0.579634	1.12138
COMMD2	-2.12398	-1.95514	-3.2097	-0.469009	-1.86334	-1.99403	-2.12398
COMMD4	-3.50908	-4.01371	-3.2106	-3.05058	-2.83923	-3.48485	-3.50908
COMMD6	-1.69964	-2.0577	-2.08436	-0.691356	-0.857007	-1.47763	-1.69964
COMMD7	-0.683235	-0.792141	-1.27676	-0.131184	-1.19982	-0.471716	-0.683235
COMMD8	-2.87834	-2.78114	-2.15249	-1.59589	-2.11745	-2.73287	-2.87834
COMMD9	0.753414	1.39816	0.291707	1.57828	0.982136	0.911712	0.753414
COMP	-0.285163	-0.330034	-0.280691	2.21077	0.82755	0.156278	-0.285163
COPA	-3.07987	-3.44371	-3.15363	-3.42166	-2.58433	-2.96266	-3.07987
COPB2	-4.70488	-4.8553	-5.0123	-4.38622	-2.37649	-4.78946	-4.70488
COPE	-2.97648	-3.18491	-3.17138	-2.11795	-2.07795	-2.83147	-2.97648
COPG1	-3.82938	-4.37929	-4.09401	-3.30238	-2.84052	-3.72504	-3.82938
COPS2	-2.04482	-2.33867	-1.48301	-2.57241	-0.606099	-1.69762	-2.04482
COPS4	-3.57701	-3.99053	-1.92985	-3.81138	-1.85473	-3.19695	-3.57701
COPS5	-2.99642	-2.91578	-2.38117	-3.39694	-1.55932	-2.76859	-2.99642
COPS6	-3.93323	-4.3717	-4.4869	-4.48905	-1.69136	-3.59213	-3.93323
COPS7A	-3.14787	-3.38835	-3.69458	-2.7975	-1.56275	-2.62945	-3.14787
COPS7B	-0.341023	-0.323501	0.198448	-0.71661	-0.559076	-0.614813	-0.341023
COPS8	-2.46878	-2.54331	-2.41473	-2.39533	-0.347903	-2.43889	-2.46878
COPZ1	-0.657832	-1.34828	-0.855581	-1.70945	-0.566381	-0.745913	-0.657832
COQ10B	-1.10023	-1.30014	-1.15489	-1.66955	-1.3168	-0.848088	NA
COQ3	2.18006	2.47554	2.81163	-0.0181403	1.40535	2.22728	NA
COQ5	3.76405	3.68616	3.75581	2.17766	1.88468	4.11525	NA
COQ6	2.1174	2.24937	2.53687	-0.137493	1.36682	2.33807	NA
COQ7	4.28544	4.24541	3.67411	2.73717	1.908	4.62845	NA
COQ9	3.70301	4.71702	4.78346	2.89332	2.5893	3.90916	NA
CORO2A	0.0188905	-0.448549	1.44376	-2.05093	-0.298848	0.276461	0.0188905
COX11	2.26264	2.32861	1.38908	0.730002	1.9901	2.07625	NA
COX15	3.72026	3.95835	5.33198	1.4018	3.08031	3.62513	NA
COX19	0.579894	0.600158	-0.0623329	-0.0877317	0.0581401	0.819487	NA
COX4I1	4.06869	3.40955	4.47484	1.03895	2.5861	4.17219	NA
COX5A	3.16132	3.62376	3.75189	1.55665	2.19183	3.35773	NA
COX5B	2.24325	2.3923	2.37813	0.762906	1.34766	2.61751	NA
COX6B1	1.07291	1.41927	0.815539	1.2789	-1.34235	1.58376	NA
COX6C	3.26406	2.69827	1.238	0.916003	1.50405	3.51252	NA
COX7A2	1.97816	2.09265	1.99065	1.3187	0.661736	2.12659	NA
COX7A2L	4.02349	4.00335	3.99249	2.54594	2.27738	4.1964	NA
COX7C	2.38364	2.31249	2.95348	0.695742	1.877	2.61387	NA
CPA3	-4.15223	-4.48307	-3.71056	-1.64685	-3.12112	-3.71756	-4.15223
CPD	1.5775	2.13057	1.71398	0.558151	3.27275	1.14943	1.5775
CPE	1.13126	0.664596	1.54196	-0.436649	1.97824	1.01817	1.13126
CPEB4	0.89832	0.29964	1.24825	-0.251957	-0.295866	1.32059	0.89832
CPM	-2.45074	-2.43243	-3.06624	-1.1769	-1.70808	-2.35754	-2.45074
CPNE2	-0.615093	-0.680405	-0.00855062	0.322527	1.6099	-0.529905	-0.615093
CPNE3	4.32061	3.53196	0.181747	3.46755	1.95152	4.22774	4.32061
CPOX	2.61198	2.23179	1.22531	1.71062	1.26118	2.45819	NA
CPPED1	-1.58114	-2.0734	-2.1942	0.748154	-1.96897	-1.34608	-1.58114
CPQ	-0.65587	-0.51505	-0.663099	0.184193	0.834556	0.415421	-0.65587
CPSF3	5.49059	6.12922	5.13219	3.77189	4.48544	5.01636	5.49059
CPSF4	3.29124	4.75638	3.21666	3.92741	3.54815	2.99528	3.29124
CPSF6	3.23085	3.74187	2.87079	1.08463	2.64263	3.00357	3.23085
CPSF7	3.06049	3.37474	3.5329	0.900785	3.60787	2.91716	3.06049
CPT1A	4.91787	4.54121	3.55687	3.42703	3.51544	4.68797	NA
CPT2	2.42156	2.65825	3.40551	-0.168251	2.37506	2.71817	NA
CPXM2	-2.47414	-2.35528	-2.77192	-0.00493275	-0.624071	-1.89935	-2.47414
CRADD	-2.26351	-2.33087	-2.5598	-0.78832	-2.13058	-1.86434	-2.26351
CRBN	0.643742	-0.297792	0.417304	-0.229383	-3.28255	1.21885	0.643742
CREB1	-1.6592	-1.5631	-1.7415	-0.15459	-2.99305	-1.5536	-1.6592
CREBBP	3.04593	2.62848	1.95556	2.38481	1.86274	3.33102	3.04593
CREG1	-1.72053	-1.20567	-1.63785	-0.701565	-0.498056	-1.85828	-1.72053
CRELD2	-4.99268	-4.16681	-3.17345	-2.23679	-4.43462	-5.0749	-4.99268
CRIPT	2.28173	2.61871	1.57227	0.851894	3.18332	2.1918	2.28173
CRISPLD2	-2.8167	-3.6936	-2.88201	0.081802	-2.70026	-2.73322	-2.8167
CRK	-1.90191	-0.633937	0.210894	-0.856018	-1.61585	-1.76716	-1.90191
CRKL	-2.05646	-1.36231	1.07751	-0.0254384	-1.97332	-1.96874	-2.05646
CRLF3	-5.05849	-5.08344	-5.05641	-0.0950742	-6.07939	-5.56206	-5.05849
CRNKL1	4.89734	4.45425	2.53031	1.81132	2.89768	4.49353	4.89734
CROCC	-4.79846	-4.66904	-3.10458	-4.42978	-2.16479	-4.28462	-4.79846
CROT	0.782836	0.42813	-1.06408	0.137497	0.639671	0.944414	NA
CRTAP	-0.82211	-1.12565	-0.809492	2.17028	-0.984203	-0.998071	-0.82211
CRTC1	-1.30284	-1.36562	-2.75615	-1.0493	-0.620974	-0.813006	-1.30284
CRTC3	-4.78019	-5.56446	-4.22025	-1.61744	-5.40525	-4.15276	-4.78019
CRYL1	-5.21488	-5.79606	-6.71128	-3.26252	-5.01567	-4.63731	-5.21488
CRYZ	-0.526681	-1.12525	0.60838	-0.195876	-0.678575	0.207131	NA
CRYZL1	-3.49842	-3.6314	-1.66166	-2.35723	-2.377	-3.02237	-3.49842
CSE1L	9.69186	9.02638	5.65858	5.69785	6.09504	9.55012	9.69186
CSF1R	-3.67456	-4.6595	-3.5829	-1.13237	-2.92342	-3.21135	-3.67456
CSK	-8.10329	-7.86877	-6.45071	-2.35251	-8.37072	-8.42327	-8.10329
CSNK1A1	1.97936	1.99969	2.27646	-1.52537	-0.0831068	1.8652	1.97936
CSNK1G1	0.140619	0.0876689	0.869087	-2.07644	1.33877	-0.320111	0.140619
CSNK1G3	0.00343153	0.0474485	0.610779	-2.29562	1.24204	-0.161047	0.00343153
CSRP1	-3.67442	-2.59085	-3.71627	0.980447	-3.68813	-3.17376	-3.67442
CSRP2	-2.05415	-1.91781	-2.23936	0.446484	-2.02282	-1.5733	-2.05415
CST3	-1.22811	-1.48555	-2.37347	-2.49367	-0.729564	-0.701611	-1.22811
CSTF1	6.87511	6.82733	3.74613	4.75131	5.09197	6.555	6.87511
CSTF3	6.40009	6.7162	6.58553	3.81135	4.83387	5.94663	6.40009
CTCF	0.833308	1.38721	1.74577	0.426229	0.446832	0.91277	0.833308
CTDP1	-5.00471	-4.57588	-1.07645	-2.80057	-5.34957	-5.19546	-5.00471
CTDSP1	-0.733122	-0.439637	-0.846339	-0.860619	-0.650541	-0.761553	-0.733122
CTDSPL2	0.842613	1.24071	3.9758	0.96704	0.475471	0.191951	0.842613
CTH	-2.75098	-2.68832	-1.50231	-3.48001	-1.2459	-2.61081	-2.75098
CTHRC1	-0.505001	0.346108	0.36682	3.44446	1.01119	-0.601846	-0.505001
CTIF	-2.58093	-1.79977	-2.01868	1.43351	-3.15675	-2.09762	-2.58093
CTNNA1	3.79959	4.79405	4.1368	0.700309	4.51515	4.07438	3.79959
CTNNB1	4.68296	5.66885	4.68711	1.69366	4.56191	4.96024	4.68296
CTSA	2.37218	1.6001	-0.46049	2.26727	0.0776832	2.34306	2.37218
CTSH	-1.02753	-0.00575833	-0.420732	0.343722	0.900694	-0.486205	-1.02753
CTSL	-2.54709	-2.31865	-2.11252	1.13111	-3.56225	-2.58358	-2.54709
CTSS	-4.52557	-3.69884	-4.01552	-0.708574	-4.10805	-4.6739	-4.52557
CTSZ	-1.12058	-0.350286	-1.83394	2.78614	-2.52475	-0.912861	-1.12058
CTTN	0.623941	0.757081	-2.16762	0.116771	1.51985	0.809731	0.623941
CUEDC1	-1.06914	-0.317878	-1.38839	-0.664295	0.815184	-0.903595	-1.06914
CUL2	0.904211	0.977711	1.80026	0.405615	-0.497267	0.458068	0.904211
CUL4A	3.56362	3.05215	1.72686	0.932521	0.414959	3.54531	3.56362
CUX1	5.60024	5.45565	3.86519	5.34635	5.0199	5.56198	5.60024
CWC22	3.33985	3.19203	2.50428	1.75815	1.78757	2.69669	3.33985
CWC25	2.53611	2.42936	2.2654	2.96553	2.57571	2.16436	2.53611
CWF19L1	2.02676	2.66544	5.91742	0.631987	1.18317	1.59968	2.02676
CXCL12	-5.87389	-6.49792	-5.96285	-2.46391	-5.10662	-5.32641	-5.87389
CXCL14	-0.441017	-0.625232	-0.278728	-1.25734	0.853428	0.148875	-0.441017
CXXC1	3.03771	2.97209	3.04094	2.12141	2.27603	3.19274	3.03771
CYB5A	-1.4036	-0.797672	-0.313269	-1.79946	0.845077	-0.979946	NA
CYB5B	-0.0443871	1.54855	1.51648	0.855499	1.6349	-0.0382294	NA
CYB5R1	-0.414769	-0.724653	-1.80862	-1.85963	-0.770749	0.46663	-0.414769
CYB5R3	-2.28877	-2.40699	-0.529958	-0.854616	-1.47114	-1.85858	NA
CYB5R4	-3.31067	-3.71785	-2.54954	-2.23124	-4.67384	-3.92103	-3.31067
CYBA	-5.62652	-5.40575	-5.06322	-1.90544	-5.65346	-6.11732	-5.62652
CYBRD1	-3.62174	-3.80504	-3.67146	-2.94313	-1.18462	-3.10579	-3.62174
CYCS	4.49953	4.95885	2.06534	3.31606	3.06055	4.36621	NA
CYFIP1	-2.36923	-2.44123	-1.58651	-0.897422	-4.98918	-2.17667	-2.36923
CYFIP2	-3.11218	-3.04689	-2.77032	-1.78525	-4.78929	-2.91483	-3.11218
CYGB	-4.81633	-5.87194	-4.45107	-1.79627	-5.04561	-4.38184	-4.81633
CYHR1	5.41324	5.21312	1.4816	4.02159	2.91896	5.21891	5.41324
CYLD	-7.60087	-6.47433	-7.46009	-2.36714	-6.36404	-7.63272	-7.60087
CYP20A1	-1.3063	-1.68298	-1.14492	-1.36558	-0.438188	-1.02736	-1.3063
CYP27A1	0.636975	0.845007	0.710867	2.06774	-0.891564	0.728729	NA
CYP2S1	1.37316	1.47278	1.26329	2.16477	0.476244	1.51534	1.37316
CYP51A1	3.55486	3.49514	2.10144	0.975771	3.34063	3.47498	3.55486
CYP7B1	-2.69152	-2.71166	-2.52812	-0.284057	-2.10645	-2.55617	-2.69152
CYTH1	-1.90451	-2.76934	-2.92841	0.908569	-4.60363	-2.43702	-1.90451
CYTH2	-0.00500047	0.167757	0.290966	-0.544872	-1.57237	0.0951415	-0.00500047
D2HGDH	0.840343	0.904447	1.44167	-0.222169	1.52051	0.837497	NA
DAAM1	1.89686	1.71318	2.21209	0.823344	3.49969	1.79177	1.89686
DAAM2	-1.03951	-1.22084	-1.05793	-0.598998	-0.689574	-0.784681	-1.03951
DAB2	-5.38409	-5.85427	-5.14846	0.402112	-7.0169	-5.02478	-5.38409
DAD1	1.60751	0.703521	1.58973	0.335668	1.2526	1.49474	1.60751
DAGLB	2.50368	3.18156	0.815211	1.65681	3.77003	2.29975	2.50368
DAP	0.43131	0.422522	-1.92918	-0.307878	1.76486	0.761399	0.43131
DAP3	7.52615	8.33415	6.36773	4.65118	6.53327	7.17951	NA
DAPK2	0.020286	0.261332	0.454786	-0.751658	-1.0055	0.23126	0.020286
DAPK3	-3.21512	-3.80017	-3.28319	0.534374	-5.18206	-2.9572	-3.21512
DARS	3.60826	3.72418	3.89056	2.33762	1.27181	3.27595	3.60826
DARS2	7.11495	7.01267	5.89933	3.5714	5.29778	6.94209	NA
DAZAP2	-2.06884	-2.11778	-2.26417	-0.998261	-1.00987	-1.5879	-2.06884
DBI	-0.872982	-0.0944014	-1.19727	-0.131122	-0.452528	-0.707335	NA
DCAF5	-0.998482	-0.619277	-0.675225	-0.648313	-0.0653327	-0.317028	-0.998482
DCAF7	5.62671	4.9771	4.48391	3.90422	3.82925	5.43563	5.62671
DCAKD	-0.797147	-0.799569	-0.96193	-1.2623	0.689166	-0.477344	NA
DCK	-2.26262	-2.41587	-0.578509	-0.329311	-3.64159	-3.20482	-2.26262
DCN	-4.97035	-4.26801	-4.89412	0.129179	-3.59966	-4.48357	-4.97035
DCP1B	-0.813504	-1.3964	-2.74328	0.356582	-0.0271838	-0.460502	-0.813504
DCTD	-1.67691	-1.57524	2.87588	-0.580594	-0.396927	-1.58174	-1.67691
DCTN2	-4.79968	-4.98537	-5.1647	-2.52499	-4.68252	-4.4912	-4.79968
DCTN4	-2.79953	-3.211	-2.78818	-2.02723	-2.97872	-2.43969	-2.79953
DCTN5	-6.34603	-6.74556	-6.38067	-4.15936	-4.78862	-5.99708	-6.34603
DCTN6	-5.17402	-5.80726	-3.9765	-4.07344	-4.46106	-4.77093	-5.17402
DCTPP1	5.40882	5.33074	2.84197	3.31097	3.80079	5.26158	5.40882
DCUN1D1	3.77806	3.67235	-0.0580272	3.25271	3.44211	3.50019	3.77806
DCUN1D3	-0.702753	-1.13778	-1.1871	-0.265415	-0.661576	-0.789242	-0.702753
DCXR	3.37018	3.19185	2.19835	1.64534	3.24877	3.7802	NA
DDA1	1.99505	2.11503	1.19565	1.848	0.515039	2.42565	1.99505
DDAH1	-1.69958	-1.97099	-0.739396	-3.09445	0.117817	-1.10988	NA
DDB2	-2.83855	-3.22682	-2.70347	-2.32496	-1.10468	-2.48529	-2.83855
DDHD2	0.325056	0.0554368	-2.10857	0.0692427	-0.349607	0.566231	0.325056
DDRGK1	-0.819839	-1.0714	-1.26448	-2.09334	-0.076787	-0.815274	-0.819839
DDX10	3.92476	4.41129	4.5716	2.55789	2.80654	3.30746	3.92476
DDX18	5.5076	5.8803	5.22052	3.34204	4.44751	4.95472	5.5076
DDX19B	-3.12005	-1.81625	-2.17727	-1.07995	-0.391417	-2.97854	-3.12005
DDX20	3.78669	4.06612	5.03679	2.10254	1.73893	3.1906	3.78669
DDX21	2.97606	3.50342	5.9213	1.92345	1.9993	2.18091	2.97606
DDX24	4.25832	4.70126	4.88219	3.79504	4.72347	3.91966	4.25832
DDX27	9.84779	8.47326	4.94413	6.36622	5.02563	9.51641	9.84779
DDX28	6.50752	7.45354	7.29798	4.42192	4.52408	6.22058	NA
DDX31	2.08398	1.80853	3.22089	0.792395	2.28774	1.67978	2.08398
DDX39A	5.01367	5.47263	3.98215	5.11551	3.01918	4.45591	5.01367
DDX41	4.87955	5.78816	5.20056	3.95074	4.48496	4.35358	4.87955
DDX47	6.09184	6.41161	4.88748	4.68675	5.43929	5.61075	6.09184
DDX49	3.09943	3.14182	2.70212	2.64464	3.78954	2.57187	3.09943
DDX50	2.30674	3.07284	6.48246	1.95365	2.93404	1.70715	2.30674
DDX51	4.91076	5.13791	4.89054	3.09109	3.55995	4.48319	4.91076
DDX52	4.03585	4.80659	4.10166	2.76311	3.74681	3.43101	4.03585
DDX54	1.09828	1.10657	0.521006	0.0902083	1.6339	0.487084	1.09828
DDX55	3.68072	3.59445	3.6187	2.82116	3.56254	2.93473	3.68072
DDX59	5.00354	3.9043	1.30084	2.42707	2.88265	4.87278	5.00354
DECR1	4.48812	3.92981	0.698504	2.73953	2.45884	4.59631	NA
DECR2	1.57304	1.29484	0.634664	0.536201	-0.772384	1.71147	1.57304
DEF6	-6.89815	-7.49915	-7.19003	-2.06787	-7.72459	-7.27014	-6.89815
DEGS1	1.37391	0.503812	-0.339089	0.582311	0.447467	1.16126	1.37391
DEK	6.48464	6.43308	5.78828	4.89062	4.01633	6.19226	6.48464
DENND1A	-5.25077	-5.61024	-4.74123	-2.05912	-6.29986	-5.07753	-5.25077
DENND2D	-3.992	-4.48391	-2.75676	-5.21944	-5.00026	-3.82113	-3.992
DENND3	-4.90394	-5.71252	-6.92534	-0.963386	-6.95124	-4.91585	-4.90394
DENND4C	-2.06914	-2.42711	-0.791507	-1.69829	-3.5312	-1.80476	-2.06914
DENND6A	-0.526937	-1.02022	-0.0221819	-1.78879	-2.34692	-0.467758	-0.526937
DENR	2.34288	2.84274	2.38123	0.887551	3.27796	2.20146	2.34288
DEPTOR	0.00168059	-0.226866	-1.98253	0.0486145	0.930011	0.486053	0.00168059
DERA	-4.72481	-5.02392	-5.81481	-3.221	-4.36142	-4.6699	-4.72481
DERL1	4.52103	3.50398	0.0616714	3.61681	2.64106	4.27311	4.52103
DES	-3.51763	-3.52748	-3.51468	-0.603469	-4.29505	-3.04447	-3.51763
DFFA	-0.0825377	0.0870701	3.70116	-1.38723	0.893807	0.087134	-0.0825377
DFFB	-1.46848	-0.83174	0.612364	-1.64539	-0.553357	-1.57582	-1.46848
DGKA	-8.16244	-8.68126	-8.40463	-4.28235	-7.16791	-7.95593	-8.16244
DGKQ	-3.42839	-3.23419	-2.20139	-2.21636	-2.32367	-2.98501	-3.42839
DGUOK	1.23994	0.944883	0.700679	-0.580262	1.641	1.60757	NA
DHCR24	2.02974	2.79557	2.96379	0.716918	2.08381	1.76548	NA
DHCR7	4.78108	4.59541	3.84416	2.41994	4.67391	4.52639	4.78108
DHFR	2.81348	3.0073	3.63673	1.74545	0.856952	1.78415	2.81348
DHODH	3.08842	3.78208	3.71054	1.4801	3.73369	3.17803	NA
DHPS	2.66589	3.20084	2.14242	1.90792	1.83751	2.12752	2.66589
DHRS1	-1.21994	-0.955169	-1.20244	-2.62406	-0.523602	-0.93648	NA
DHRS11	0.541875	1.35845	0.333221	0.187157	1.62868	0.767523	0.541875
DHRS3	2.34773	2.88278	3.04782	1.11066	2.24122	2.56372	2.34773
DHRS7	-0.203484	-0.0225032	0.253586	-0.437431	1.37429	0.0201635	-0.203484
DHRS7B	0.727598	0.872858	2.4739	-0.674074	1.79163	1.09501	NA
DHX29	1.28494	1.80914	3.17905	-0.564532	2.33355	1.29211	1.28494
DHX32	-0.529769	-0.380107	0.758753	-3.25479	1.07203	-0.304591	-0.529769
DHX33	3.06934	3.01772	3.17143	2.41447	1.36388	2.40907	3.06934
DHX35	3.37261	3.67812	2.75277	3.17839	3.53881	2.90495	3.37261
DHX36	3.32048	2.10414	-0.636858	1.91416	0.538438	2.80779	3.32048
DHX37	2.83591	2.78042	2.57641	1.67406	2.49954	2.52207	2.83591
DHX57	3.35714	3.37897	2.9458	1.80327	4.70577	2.57785	3.35714
DIABLO	4.72641	5.34392	4.67445	3.18006	3.94954	4.98606	NA
DICER1	-0.956929	-0.945475	-0.672085	-1.20311	1.0789	-1.54775	-0.956929
DIDO1	7.77874	7.37541	4.61973	4.42903	5.62752	7.57776	7.77874
DIMT1	0.300077	0.539776	1.49834	-0.0902017	0.0961833	-0.047926	0.300077
DIP2B	2.86526	2.92979	2.57958	2.3829	3.11494	2.6353	2.86526
DIP2C	0.336071	0.189812	0.0527163	2.22176	-0.0551321	0.899571	0.336071
DIS3	2.22084	2.86097	0.303843	1.16931	0.810253	1.95309	2.22084
DLAT	1.87203	2.59735	4.21531	0.134751	2.1707	1.94505	NA
DLD	4.17755	4.20129	1.84613	0.900548	4.06124	4.179	NA
DLG1	3.22464	3.07402	2.22937	1.24229	4.1116	3.47573	3.22464
DLST	2.72577	3.23178	4.4292	0.686529	4.69939	2.94608	NA
DMTN	-1.2003	-1.31107	-0.308267	-1.1507	-0.123884	-0.955803	-1.2003
DNAJA1	1.23646	1.12436	1.78781	0.599256	-0.104688	0.466788	1.23646
DNAJA2	1.11948	3.07965	1.14658	1.04737	1.3397	0.905777	1.11948
DNAJA3	6.25138	6.86154	5.34585	4.00254	5.15585	6.10682	NA
DNAJA4	-1.8499	-1.84996	-0.274885	-2.27377	-1.85184	-1.67001	-1.8499
DNAJB1	3.56931	3.34676	2.08225	0.890621	1.10032	3.52373	3.56931
DNAJB11	-0.865977	-1.23708	-2.52343	0.240532	-1.25691	-1.38753	-0.865977
DNAJB12	-0.583822	-0.445887	1.8222	-1.40024	0.162218	-0.85164	-0.583822
DNAJB14	-1.73579	-1.60209	0.626262	-1.72167	-0.452442	-2.02122	-1.73579
DNAJB2	-1.66523	-1.37921	-1.93563	-2.24179	-0.804875	-1.25437	-1.66523
DNAJB4	-3.16996	-3.79509	-2.56627	-1.4101	-3.77866	-3.09958	-3.16996
DNAJB6	-0.0986877	-0.126783	-0.930177	-0.892973	-0.416742	-0.227343	-0.0986877
DNAJC1	-4.10457	-5.28813	-3.95302	-4.02469	-4.32455	-4.189	-4.10457
DNAJC10	-0.758759	-0.817521	-1.40295	-1.63817	-2.26307	-0.899492	-0.758759
DNAJC11	5.10349	4.93145	7.63017	2.14916	4.78599	5.09395	NA
DNAJC16	0.0158349	0.856945	2.34831	-1.62366	1.32466	-0.309207	0.0158349
DNAJC17	-2.38655	-1.87093	0.807027	-2.56228	-1.95232	-2.51487	-2.38655
DNAJC19	8.08407	9.21166	7.30462	5.07932	6.85335	7.82147	NA
DNAJC2	5.65569	5.2329	2.04204	3.36236	3.69949	5.1768	5.65569
DNAJC21	1.80899	1.94206	-1.8915	0.954816	3.47978	1.57207	1.80899
DNAJC30	1.44479	1.49334	0.946801	-0.806837	2.03608	1.36018	NA
DNAJC7	0.459477	0.604371	0.0103748	0.259566	-0.590832	-0.497219	0.459477
DNAJC8	-4.05872	-3.72506	0.450572	-3.34198	-3.75092	-4.04398	-4.05872
DNASE2	1.883	2.18915	1.21487	2.46209	2.24783	1.84706	1.883
DNM1L	2.79828	3.41951	1.88829	2.61387	3.3933	2.69531	NA
DNPH1	0.192031	-0.0601111	-0.872636	0.20369	-1.5684	0.636453	0.192031
DNTTIP1	2.72192	2.69365	1.79271	1.79014	2.42536	2.64219	2.72192
DNTTIP2	4.04797	4.30648	5.44992	1.91279	2.73882	3.49327	4.04797
DOCK2	-7.89114	-8.38575	-7.8325	-1.89597	-9.00932	-8.07003	-7.89114
DOCK5	-3.30226	-3.27831	-1.58568	-2.83366	-2.63873	-3.15881	-3.30226
DOCK6	1.76857	1.49841	1.52687	1.34865	0.897741	2.0885	1.76857
DOCK8	-6.44605	-7.18431	-6.3173	-1.77151	-7.80472	-6.3544	-6.44605
DOHH	-0.91526	-0.224237	0.190952	-0.554898	-1.06769	-1.44022	-0.91526
DOK1	-5.2831	-5.68968	-5.51571	-2.81965	-5.04596	-4.99532	-5.2831
DOK2	-5.63578	-7.1718	-6.201	-0.873512	-9.46744	-5.77352	-5.63578
DOK3	-6.1129	-6.02212	-6.16146	-1.37966	-5.9369	-7.07756	-6.1129
DPCD	-2.69711	-2.31752	-1.23372	-4.50278	-0.431836	-2.64189	-2.69711
DPF2	3.8525	3.54494	3.89948	1.9376	3.66797	3.86	3.8525
DPH2	1.25891	1.40277	2.18812	-0.492343	1.84065	0.812159	1.25891
DPH5	1.85356	1.95989	3.54078	1.21906	0.399275	1.27084	1.85356
DPM1	1.87894	2.06394	0.457491	0.549119	1.63089	1.70427	1.87894
DPM3	1.46671	1.23948	1.36831	-0.180863	2.42232	1.31267	1.46671
DPP3	1.42014	1.66525	0.588987	0.24354	2.31284	1.31536	1.42014
DPP4	-2.65415	-2.76145	-2.7399	-1.45894	-0.609805	-2.21041	-2.65415
DPP7	-1.70539	-1.64208	-1.41276	-1.77528	-0.130641	-1.27628	-1.70539
DPP9	-0.995666	-0.733615	-0.340233	0.549725	-1.58658	-1.53738	-0.995666
DPT	-4.69613	-5.48089	-4.26947	-0.859199	-4.37201	-4.18528	-4.69613
DPY19L1	0.868322	0.536109	-0.854934	0.602615	2.78962	0.838784	0.868322
DPY30	6.28123	7.73517	6.10954	5.0987	5.39634	6.14111	6.28123
DPYSL2	-3.23223	-2.5792	-2.2577	-0.762975	-3.18268	-2.82633	-3.23223
DPYSL3	-2.03596	-1.90824	-2.05621	3.28662	-1.71286	-1.68867	-2.03596
DR1	1.15185	1.96007	3.75388	3.12422	-2.02717	1.21024	1.15185
DRAP1	1.84584	1.56224	1.71999	2.65219	-0.555232	1.71538	1.84584
DRG1	1.75552	2.62763	2.78972	0.838423	0.721804	1.06965	1.75552
DRG2	-2.20639	-1.66051	0.113496	0.310937	-2.94225	-2.36139	-2.20639
DSCC1	4.49519	4.61896	1.49452	3.11015	2.59042	3.56677	4.49519
DSG2	2.36112	2.94938	3.44964	-0.929764	2.2044	2.07049	2.36112
DSN1	3.84845	3.50861	1.98052	2.67199	2.79249	3.22939	3.84845
DSP	3.77945	3.88701	3.40414	0.24129	2.39109	3.54627	3.77945
DST	-2.25968	-2.44004	-2.65806	-1.6984	-2.61997	-2.23589	-2.25968
DSTN	0.380934	0.255159	-1.82026	0.706927	-0.236336	1.05715	0.380934
DTNA	-0.924003	-1.25233	-0.680404	0.588924	-2.37249	-0.489388	-0.924003
DTNBP1	-1.60642	-1.74036	-2.26235	0.891893	-3.42075	-1.25807	-1.60642
DTWD2	-1.11988	-0.737174	-0.392423	-2.24002	0.778109	-0.861582	-1.11988
DTX3L	-1.59394	-2.49246	-3.5595	-0.769379	-2.3334	-1.79703	-1.59394
DTYMK	2.61044	2.94048	3.31527	-0.0119378	1.81689	1.99918	NA
DUS1L	-0.380921	-0.411948	-1.97049	-1.51649	-0.64625	-0.503752	-0.380921
DUSP11	2.92604	2.88622	1.97105	2.09224	2.7032	1.99361	2.92604
DUSP12	2.41161	1.78147	-1.42606	1.64973	1.5602	1.94086	2.41161
DUSP22	-4.40324	-4.58823	-4.82832	-2.16069	-4.25128	-3.78444	-4.40324
DUSP23	1.38851	1.11532	-1.30066	1.06171	0.792804	1.55051	1.38851
DUSP3	-3.49163	-3.53012	-3.62467	0.97005	-3.69081	-3.21561	-3.49163
DUT	2.9087	3.55267	5.75717	1.63806	2.73878	2.24828	NA
DVL2	-0.936006	-0.228154	2.16279	-0.171302	-0.351417	-0.931969	-0.936006
DVL3	0.13539	-0.0735356	-1.59937	1.50808	1.05485	0.347311	0.13539
DYM	-0.881706	-1.09712	0.990868	-1.34982	-3.06448	-0.928015	-0.881706
DYNC1I2	-1.74474	-2.07371	-1.97985	-1.55762	-1.22325	-1.44151	-1.74474
DYNC1LI2	-0.265761	0.201934	1.27043	-0.105792	1.23215	0.0397044	-0.265761
DYNLL1	-1.11184	-0.934322	-1.18113	-2.54063	-0.227515	-1.02945	-1.11184
DYNLL2	1.78914	1.76175	1.20644	0.747171	1.752	2.42943	1.78914
DYNLT1	0.0257243	0.121853	0.46408	-0.238225	-0.251181	-0.264217	0.0257243
DYRK1A	0.0934109	0.551989	1.6843	1.10045	0.414805	0.124883	0.0934109
E2F4	-0.721916	0.364405	0.358144	0.523015	0.346782	-0.60218	-0.721916
EAF1	1.31572	0.712147	1.35118	0.936925	0.318141	0.860749	1.31572
EAPP	3.55249	3.63586	3.48237	2.34672	3.8565	3.09817	3.55249
EBNA1BP2	3.85104	3.55091	3.98199	1.41883	2.39951	3.45187	3.85104
ECE1	0.443828	0.377784	1.75072	0.0757576	1.58811	0.0105857	0.443828
ECH1	2.37717	2.24871	1.4517	1.72579	1.1328	2.54133	NA
ECHDC1	-4.53583	-4.58965	-4.2684	-2.7262	-3.71226	-4.08303	NA
ECHDC2	-2.89195	-2.62294	-2.2654	-3.10288	-0.28062	-2.18785	NA
ECHS1	1.20702	0.993281	2.63834	-1.29152	0.726077	1.67334	NA
ECI1	3.00473	2.4577	1.7624	1.02069	2.37817	3.15396	NA
ECI2	-1.19976	-1.33379	-1.87161	-4.28604	-1.19366	-0.943317	NA
ECM1	-1.93271	-2.02811	-2.35516	-0.992789	-0.2731	-1.85559	-1.93271
ECT2	5.22655	5.27679	2.72879	3.78101	3.90505	4.56267	5.22655
EDC3	0.479335	0.622054	3.31358	-0.92457	-0.197601	-0.0822618	0.479335
EDEM3	1.05703	0.540674	-0.989439	-0.537007	0.953621	0.68666	1.05703
EDF1	-1.20724	-1.5944	-0.971821	-1.98662	-2.87787	-1.22336	-1.20724
EEF1A1	-0.878648	-0.749983	0.142816	-0.43086	-1.61729	-1.18242	-0.878648
EEF1B2	-1.24172	-0.71407	-1.26123	-0.572617	-1.9575	-1.54285	-1.24172
EEF2	-1.33386	-1.43194	-0.195202	-1.4239	-1.43742	-2.08746	-1.33386
EEPD1	1.11412	1.03875	-1.2695	0.703113	2.07038	1.20262	1.11412
EFEMP1	-2.03307	-2.04986	-2.23185	1.81919	-2.88289	-1.45717	-2.03307
EFEMP2	-1.93326	-2.15673	-2.00723	1.9262	-2.37842	-1.40581	-1.93326
EFHD2	-4.99514	-4.34957	-3.88692	-0.401041	-5.01308	-5.47126	-4.99514
EFNB2	-0.600165	-0.464231	-1.05681	-0.764298	0.469698	-0.39531	-0.600165
EFR3A	-0.536966	-1.54464	-2.49792	-1.21076	0.438489	-0.326353	-0.536966
EGLN1	2.83256	1.85703	0.479296	1.47989	0.924844	2.80246	2.83256
EHBP1	-1.17898	-1.33287	-2.75288	0.0241375	0.167167	-1.10472	-1.17898
EHBP1L1	-5.75122	-6.40782	-6.17778	-1.26481	-6.86145	-5.86163	-5.75122
EHD2	-4.84253	-4.85455	-4.87396	-1.02723	-3.73364	-4.34161	-4.84253
EHD3	-2.78427	-3.06526	-3.01151	-0.357917	-2.56914	-2.4023	-2.78427
EHD4	-6.8417	-6.46634	-4.79508	-1.74051	-6.76405	-6.52113	-6.8417
EHHADH	0.849658	0.602454	-1.32467	0.410295	1.31153	0.948772	NA
EHMT1	1.20799	1.22489	2.60147	0.381662	1.13321	0.554413	1.20799
EIF1	0.95447	1.68893	0.716965	1.66056	-0.0159817	0.76614	0.95447
EIF1AD	0.605808	0.603553	0.112746	1.72544	-0.827382	0.631347	0.605808
EIF1B	1.38	1.3842	1.3227	0.943221	-0.414141	1.4389	1.38
EIF2A	2.26096	1.97575	-1.04603	1.00203	1.26428	1.8179	2.26096
EIF2AK2	0.767244	1.11307	0.294714	1.72284	1.1866	0.260264	0.767244
EIF2B1	2.11919	2.34329	2.20617	2.2387	1.73024	1.63769	2.11919
EIF2B2	-0.402481	0.319455	-0.0914386	-1.06368	1.58973	-0.693344	-0.402481
EIF2B5	2.54279	2.77248	2.10756	0.923631	1.88123	2.23387	2.54279
EIF2D	1.10486	0.76668	-1.13208	-0.245536	0.397362	1.25796	1.10486
EIF2S2	3.09653	2.55346	0.854853	1.46116	1.24487	2.49308	3.09653
EIF3J	-0.345054	-0.1871	2.66985	-0.458814	-0.426426	-0.844223	-0.345054
EIF3M	0.950373	0.374359	0.936183	-1.4724	-0.629172	0.27843	0.950373
EIF4A3	4.11521	4.44112	2.60756	3.10403	3.90426	3.60491	4.11521
EIF4B	-1.0141	-0.70243	-1.94535	-1.93878	-0.573902	-1.44277	-1.0141
EIF4E	-1.57938	-0.72564	1.80022	-1.57206	-1.87307	-1.83179	-1.57938
EIF4E2	0.0069422	0.405796	0.492379	-0.473686	-0.791678	-0.397585	0.0069422
EIF4E3	-4.39992	-5.07632	-3.99539	-2.56533	-4.11372	-3.61249	-4.39992
EIF4EBP2	-2.39436	-2.00304	-1.58283	-1.53592	-1.5179	-1.90163	-2.39436
EIF4ENIF1	0.647937	1.45082	3.37776	0.108479	1.65578	0.468343	0.647937
EIF4H	1.68749	2.38078	-1.05057	1.52931	1.44116	1.37202	1.68749
EIF5	2.10671	2.54175	2.90559	1.24985	2.38279	1.90466	2.10671
EIF5A2	-0.162004	0.140704	-0.933379	2.12226	-0.030897	0.127691	-0.162004
EIF5B	2.9318	3.19324	2.12571	1.74879	1.80737	2.28795	2.9318
ELAC2	0.885139	2.14131	6.4251	-0.247402	0.755582	0.338882	NA
ELF1	-3.77564	-3.33183	-4.59502	-0.980178	-4.55656	-3.60016	-3.77564
ELL	0.761519	0.664949	-0.402688	2.67963	-0.576626	-0.23758	0.761519
ELMO1	-8.61896	-8.99099	-7.50451	-2.0802	-9.09019	-8.53381	-8.61896
ELMO2	-4.3313	-4.76821	-5.34462	1.32624	-5.49929	-4.41466	-4.3313
ELMO3	-0.709116	-0.783652	-0.0420159	-3.65881	1.6788	-0.369412	-0.709116
ELMOD2	0.294576	-0.20777	1.75299	-1.1201	2.20911	0.362252	0.294576
ELMSAN1	0.469175	0.616086	1.88714	-0.852596	1.7676	0.536175	0.469175
ELN	-3.34609	-4.36637	-3.26105	-1.85433	-3.6694	-2.72086	-3.34609
ELOF1	2.20179	2.322	1.7118	0.965005	1.19	2.37189	2.20179
ELOVL5	1.80282	1.53777	1.36485	1.12906	2.97308	1.22738	1.80282
ELP3	-1.79119	-1.06834	0.52221	-2.02234	-1.46026	-2.15147	-1.79119
ELP4	-2.21561	-2.63599	-2.34963	-1.74972	-2.75815	-2.34606	-2.21561
ELP6	-2.24839	-3.19074	-2.20729	-2.36581	-3.10258	-2.36468	-2.24839
EMB	-2.34498	-2.31052	-2.20591	-0.71419	-1.54153	-2.23177	-2.34498
EMC1	3.3147	2.99752	3.34324	1.42448	3.58353	3.02861	3.3147
EMC10	2.37973	1.99302	2.43428	1.95577	2.99565	2.19648	2.37973
EMC2	2.55198	2.24116	1.1564	1.70649	1.23527	2.31121	NA
EMC4	2.65187	2.53788	2.62219	1.05384	2.40976	2.50232	2.65187
EMC7	2.35397	1.8694	3.13876	1.03449	2.46574	2.11905	2.35397
EMC8	-0.957023	0.70237	0.293724	0.543651	-0.571577	-1.21355	-0.957023
EMILIN2	-5.05506	-4.58609	-4.77973	-0.155967	-5.94685	-5.28206	-5.05506
EML1	-2.19067	-2.80379	-2.00549	-0.359608	-1.54277	-1.52619	-2.19067
EML2	-3.69129	-4.19539	-3.65709	-4.99335	-3.73729	-3.05681	-3.69129
ENAH	0.618115	0.422109	-1.17338	0.92325	0.081624	0.740117	0.618115
ENDOD1	0.1754	0.0442909	0.258978	-0.815656	0.765509	0.458862	0.1754
ENDOG	-3.1358	-3.76196	-2.55856	-3.35383	-3.31735	-2.99245	NA
ENG	-4.6788	-5.4839	-4.4306	-1.95012	-5.78227	-4.35643	-4.6788
ENGASE	2.25482	2.15984	1.0964	2.47334	-0.299926	2.83307	2.25482
ENO1	-0.0569179	0.108386	1.02488	1.55485	0.58213	-0.480002	-0.0569179
ENO2	-0.311755	-0.149754	-1.04081	0.403174	0.503298	-0.183127	-0.311755
ENOPH1	0.889801	0.848576	3.26657	0.55383	0.393276	1.00477	0.889801
ENOSF1	-4.10634	-4.37019	-3.58648	-5.1217	-2.30454	-4.02043	-4.10634
ENPEP	-1.58997	-2.11131	-1.69728	-0.541591	-1.03617	-1.43088	-1.58997
ENPP4	-1.21466	-1.35412	-1.76591	-1.9607	-0.0227728	-0.918522	-1.21466
ENSA	2.69948	1.72886	-0.155928	0.517393	2.45154	2.9481	2.69948
ENTPD5	-1.42711	-0.989339	-0.805802	-2.85895	1.36159	-1.37875	-1.42711
ENY2	4.86806	4.2592	1.64707	2.858	2.79777	4.7621	4.86806
EOGT	-3.70272	-3.40334	-3.62159	-0.863412	-5.79426	-3.71692	-3.70272
EPB41	-1.2958	-0.71512	-0.608146	-1.62658	-0.609555	-1.32994	-1.2958
EPB41L1	3.1872	2.5869	0.890749	0.915594	0.796219	4.00595	3.1872
EPB41L2	-5.47545	-5.90648	-5.39496	-1.01017	-4.84504	-5.0794	-5.47545
EPB41L3	-6.55576	-6.34731	-6.34339	-2.13135	-5.529	-6.57923	-6.55576
EPB41L5	2.18543	2.94234	1.92675	-0.45448	3.22546	2.32448	2.18543
EPCAM	6.27999	6.2615	5.51423	1.60893	7.55872	5.91869	6.27999
EPHB2	0.412255	0.377049	1.00502	1.10873	1.14159	0.276076	0.412255
EPHB3	1.27382	1.41626	0.77307	-0.712427	2.28867	1.45759	1.27382
EPHB4	0.394333	0.400707	-1.51725	-1.05642	1.89546	0.348533	0.394333
EPHX2	-3.32493	-2.24746	-1.41499	-3.85279	-0.758074	-2.88158	NA
EPM2A	-1.0573	-1.43521	-0.942555	0.549501	-0.718176	-0.414059	-1.0573
EPM2AIP1	0.847192	0.480604	0.958695	0.467513	0.870048	1.72869	0.847192
EPN1	-4.63607	-5.25655	-5.79193	-1.85199	-5.77224	-4.17992	-4.63607
EPN3	3.04303	2.8145	2.50087	0.107609	1.1257	3.45929	3.04303
EPRS	4.57286	3.72026	2.49635	0.948439	3.74054	4.27262	4.57286
EPS15	-6.51832	-6.87393	-5.25494	-2.3353	-6.26659	-6.16764	-6.51832
EPS15L1	-0.805406	-1.21376	-2.11774	0.0814823	-2.5231	-0.338705	-0.805406
EPS8	0.992424	0.790521	0.381549	1.12789	1.92506	1.46872	0.992424
EPS8L1	-2.44024	-2.43047	-2.44346	-3.2889	-1.53015	-2.28941	-2.44024
EPSTI1	-3.37645	-3.35277	-3.44084	0.665766	-4.2815	-3.92074	-3.37645
ERAL1	7.27253	8.11296	7.26517	4.92571	5.79107	6.92669	NA
ERAP1	-3.42815	-3.14038	-2.46613	-0.885003	-2.30203	-3.37102	-3.42815
ERAP2	-1.60235	-1.75452	-1.55359	-0.684591	-1.48391	-1.70111	-1.60235
ERBB2	1.99425	1.66974	1.68745	0.274085	4.43536	1.89577	1.99425
ERBB3	0.957763	1.67473	0.49967	-0.924804	1.87534	1.22222	0.957763
ERC1	-1.21589	-1.44785	-3.17766	0.190836	-1.47409	-1.05156	-1.21589
ERCC2	1.29977	1.72011	1.41957	0.701539	1.9618	0.678309	1.29977
ERCC3	2.86191	2.98747	2.87272	2.38452	1.82674	2.25964	2.86191
ERH	2.30199	3.46757	2.39869	1.8307	1.78036	2.22694	2.30199
ERI1	-2.97597	-1.47153	-0.241508	-0.918987	-2.21952	-3.67667	-2.97597
ERLEC1	-4.7221	-4.60781	-5.13701	-3.41557	-2.12151	-4.47833	-4.7221
ERLIN1	-1.77831	-1.45327	-0.00192459	-2.56389	-0.43549	-1.95323	-1.77831
ERLIN2	1.29448	1.09213	-0.7226	-0.511927	1.72304	1.63534	1.29448
ERMP1	3.7275	3.73311	4.69934	2.17635	3.81163	3.64669	3.7275
ERP29	-1.46345	-1.08217	-1.7492	-1.41043	0.650578	-1.5036	-1.46345
ERP44	-2.5593	-2.45635	-1.31313	-1.16425	-2.6223	-2.49907	-2.5593
ESAM	-1.3814	-1.85531	-1.09196	0.519182	-1.17021	-0.842323	-1.3814
ESD	-4.5172	-4.13133	-5.9829	-2.0544	-3.94061	-3.92882	-4.5172
ESF1	8.14354	8.17908	6.29924	5.13498	6.14791	7.7365	8.14354
ESPN	0.936453	0.635137	1.45403	-0.0239604	0.566604	0.882173	0.936453
ESRP2	3.77193	4.74514	4.81463	0.94645	3.99594	3.76939	3.77193
ESRRA	-0.247172	0.0633991	-0.831179	-1.22171	0.520457	-0.209056	-0.247172
ESYT1	0.749155	0.578325	0.370581	1.74773	-0.192159	0.51067	0.749155
ESYT2	0.929928	0.029073	-0.580953	0.723345	0.863359	0.920007	0.929928
ETF1	0.239174	0.587839	1.69689	-0.639929	0.8861	0.0249997	0.239174
ETFA	-0.107263	-0.100644	0.875382	-0.33867	0.0639215	0.151851	NA
ETFDH	-2.91357	-2.953	-0.920608	-4.32011	-0.666779	-2.36997	NA
ETHE1	0.519687	0.412536	0.150429	0.499734	0.180597	0.616995	NA
ETNK1	2.57019	2.45886	0.807548	0.702382	3.09563	2.06252	2.57019
ETV6	-0.426255	-0.356684	-2.31615	0.263036	-1.10423	-0.690147	-0.426255
EVA1B	-1.00509	-1.05466	-0.664812	-0.874668	-0.163746	-0.657784	-1.00509
EVPL	0.104813	0.90362	-0.0630016	-0.593454	0.601006	0.569961	0.104813
EXD2	4.3357	5.07925	6.02165	1.02075	5.94681	4.29073	4.3357
EXOC1	0.251647	-0.478363	1.11821	-1.81922	0.893927	0.612051	0.251647
EXOC5	-1.52084	-1.08408	-0.975203	-2.2519	0.490407	-1.2414	-1.52084
EXOC6	-1.49123	-0.545765	-0.0736152	-2.87887	0.502021	-1.56272	-1.49123
EXOC6B	-1.10595	-1.59185	-1.92148	-0.7809	0.0732841	-0.539889	-1.10595
EXOC7	-1.11235	-1.17441	-0.973887	-2.12013	0.772289	-0.735703	-1.11235
EXOC8	-0.731971	-0.943041	-1.35667	-1.92338	0.406175	-0.252203	-0.731971
EXOG	-0.413335	-0.41593	-0.512489	-1.69285	-0.0869898	-0.451535	NA
EXOSC1	2.30995	1.65016	2.82921	1.39331	-0.0820048	1.88003	2.30995
EXOSC2	2.31767	2.07758	2.73079	2.1546	0.108347	1.71643	2.31767
EXOSC5	0.328816	0.553536	0.269535	-0.484879	0.359682	-0.192643	0.328816
EXOSC8	2.39747	2.00545	2.14974	0.890832	0.175604	1.88683	2.39747
EXOSC9	0.838422	0.672468	1.25424	-0.0303295	-1.03319	0.122354	0.838422
EXTL2	-1.22195	-1.48086	-0.526107	-1.66733	-0.46508	-1.05198	-1.22195
EZH2	3.87487	3.93199	3.67321	3.40826	3.06529	2.04876	3.87487
EZR	-2.34925	-2.31255	-1.4797	-2.28202	-1.34087	-2.33355	-2.34925
F12	-4.39475	-4.37687	-4.46622	-2.61112	-3.92281	-4.09639	-4.39475
F13A1	-6.12205	-7.76453	-6.06967	-1.85508	-7.47576	-5.7335	-6.12205
F3	-3.07347	-2.70154	-2.83902	-3.31051	-2.7826	-3.51069	-3.07347
FABP5	-1.57142	-1.6347	-1.73769	-1.06215	-0.970616	-1.611	-1.57142
FADD	1.15408	1.5203	-2.47301	1.6946	2.00645	0.919212	1.15408
FAF1	2.68807	2.62104	5.27977	1.32712	2.52523	2.3485	2.68807
FAF2	3.14161	3.69604	4.69939	2.27935	2.95234	3.11705	3.14161
FAH	-1.77363	-1.56597	-1.32102	-1.48545	-0.422556	-1.28522	-1.77363
FAHD1	4.04536	3.8891	2.954	2.79845	1.86053	4.55832	NA
FAHD2A	3.36326	3.2005	2.25026	2.50432	2.5234	3.41317	NA
FAM107B	-4.5251	-4.87614	-4.56719	-2.39497	-4.86086	-4.25827	-4.5251
FAM114A1	-4.28024	-3.92819	-2.37213	-2.49416	-1.81417	-4.16864	-4.28024
FAM114A2	-4.93141	-4.97286	-4.53094	-3.26715	-4.06604	-4.65848	-4.93141
FAM118B	-2.28039	-2.21681	-1.08642	-1.65686	-0.87746	-2.09674	-2.28039
FAM120A	-1.40723	-1.56922	-0.24119	-2.59175	-0.590992	-1.15515	-1.40723
FAM120B	-1.86714	-1.51164	-0.308242	-1.96901	-1.59744	-1.51537	-1.86714
FAM126A	-4.03106	-3.79507	-5.07302	-0.849106	-2.59088	-3.77906	-4.03106
FAM129A	-4.71249	-5.28497	-4.96014	-2.6171	-2.63586	-4.45694	-4.71249
FAM129B	-1.01871	-0.916055	-0.438166	-1.03209	-1.28705	-0.902448	-1.01871
FAM136A	4.72116	5.06603	3.67956	2.44473	4.53144	4.26014	NA
FAM160A2	-0.173099	-0.15178	1.03994	-1.55084	-1.43096	0.233732	-0.173099
FAM160B2	-0.882406	-0.10491	1.8529	-1.40469	-0.767587	-0.894672	-0.882406
FAM162A	2.83499	2.94869	1.79626	-0.0638692	2.95894	2.77014	NA
FAM168A	1.41628	0.959067	-0.121405	2.23838	1.34633	1.95616	1.41628
FAM169A	0.644273	0.34952	1.09368	-0.350152	0.937459	0.920222	0.644273
FAM192A	1.51701	3.70726	3.10963	1.59065	1.84214	1.03637	1.51701
FAM207A	2.45912	2.72282	3.11427	1.42521	2.37737	1.35166	2.45912
FAM20B	2.31332	2.17533	0.393668	-0.472194	4.17803	2.22719	2.31332
FAM210A	3.83442	4.24116	4.99962	2.25729	3.37412	3.40237	NA
FAM210B	6.87617	5.88736	3.05699	2.98846	5.3922	7.15469	NA
FAM32A	2.8947	2.81814	1.73533	2.70234	2.03996	2.57142	2.8947
FAM3C	0.391908	-0.0484884	-1.28395	-0.714423	0.678557	0.29849	0.391908
FAM49A	-5.82494	-5.94005	-5.89731	-0.108227	-7.01786	-5.60174	-5.82494
FAM76B	1.17036	1.40953	1.84769	0.832526	1.85779	0.216695	1.17036
FAM83B	-0.0676347	-0.246299	-1.25618	-1.14374	-0.817933	-0.410614	-0.0676347
FAM8A1	0.565801	0.576366	0.500137	-0.915029	2.19729	0.770869	0.565801
FAM98A	-1.34417	-0.696829	-1.83239	-1.24233	-1.07292	-1.60025	-1.34417
FAM98B	-0.806782	-0.536283	1.36976	-1.72692	-0.31299	-0.33265	-0.806782
FAM98C	-2.303	-2.75568	-2.73437	-2.93306	-1.60706	-1.8516	-2.303
FANCI	3.7316	4.26602	4.62415	2.9545	2.90668	2.6965	3.7316
FAP	-2.78921	-2.48223	-2.8539	1.68915	-1.64573	-2.93109	-2.78921
FAR1	0.288753	0.08171	0.383086	0.3136	0.278804	-0.69818	0.288753
FARP2	-0.291078	-0.0518562	0.14225	-2.52921	0.130082	0.00236339	-0.291078
FARS2	5.68585	5.49573	4.96785	3.0804	3.6219	5.59149	NA
FARSB	2.2314	2.48052	2.58163	-0.475586	0.049818	2.39115	2.2314
FASN	2.89271	2.82629	1.77454	1.10133	3.17028	2.37222	NA
FASTKD1	3.00182	3.10346	2.61028	1.84688	3.4241	2.83226	NA
FASTKD2	5.29797	5.74611	5.1728	3.28883	4.1076	4.82774	NA
FAT1	-0.0768607	-0.509286	0.695652	-0.589897	-0.150159	-0.295668	-0.0768607
FAU	-3.14427	-3.73035	-3.13128	-2.683	-3.88483	-3.02843	-3.14427
FBL	3.56978	3.39487	3.22628	1.43837	0.983566	3.63716	3.56978
FBLN2	-3.56456	-3.05839	-3.56564	1.19863	-3.15371	-3.29498	-3.56456
FBLN5	-3.0346	-3.78893	-3.18474	-0.269697	-3.51553	-2.32358	-3.0346
FBP1	-2.75811	-3.24172	-2.02554	-1.39886	-2.4073	-2.52291	-2.75811
FBXL12	0.354353	0.112357	0.306374	0.695866	-0.0612561	0.259019	0.354353
FBXL18	3.92641	4.15874	1.50113	3.51522	4.84075	3.73332	3.92641
FBXL20	2.33485	2.51341	2.10287	1.52863	4.45769	2.29976	2.33485
FBXO21	1.79761	2.56583	1.62179	-0.393901	2.07047	1.79653	1.79761
FBXO28	0.816958	0.991493	-1.30484	1.13325	0.739872	0.647647	0.816958
FBXO3	0.11239	-0.802471	-0.596882	-0.703788	-0.55718	1.05565	0.11239
FBXO30	-0.140029	0.264357	0.37366	0.59122	0.933374	-0.381082	-0.140029
FBXO4	0.124759	-0.572086	-2.97825	-0.528557	0.436101	0.28408	0.124759
FBXO45	0.480326	0.0900106	-0.481265	0.393076	-0.484213	-0.179758	0.480326
FBXO6	-3.59248	-3.62162	-2.42737	-1.8995	-4.08224	-4.07921	-3.59248
FBXO7	-2.73525	-2.58225	-1.16981	-2.50331	-1.82685	-2.8124	-2.73525
FCF1	1.15309	0.838315	0.980599	0.150116	0.707179	1.04394	1.15309
FCGBP	-2.48401	-2.57548	-2.5146	-2.25831	-1.68077	-2.03479	-2.48401
FCGR2B	-4.14216	-4.24681	-3.95923	-0.507291	-5.16112	-4.34453	-4.14216
FCGRT	-1.17681	-1.41321	-1.0902	1.34243	-2.47442	-0.817543	-1.17681
FCHO2	-4.61527	-4.39491	-2.82799	-2.60885	-4.37625	-4.26059	-4.61527
FCHSD1	-4.39583	-4.04435	-3.70469	-0.752558	-5.24722	-3.97722	-4.39583
FDFT1	1.2959	2.40108	3.32962	0.283375	2.07681	1.02523	1.2959
FDPS	1.9376	1.26306	-0.706541	-0.739191	0.427387	1.58461	NA
FDX1	1.89481	3.14286	3.21526	1.52512	3.25193	1.95697	NA
FDXR	2.31723	2.15921	0.99287	0.742018	2.57896	2.80025	NA
FECH	-2.62535	-1.36567	0.107689	-1.29342	-1.04433	-2.39678	NA
FER	-3.61973	-3.06421	-2.64718	0.0227252	-4.34726	-2.82601	-3.61973
FERMT2	-3.67495	-3.36791	-3.47087	1.08586	-3.29105	-3.15914	-3.67495
FERMT3	-5.4007	-5.85382	-5.42703	-0.530116	-6.82948	-5.97356	-5.4007
FES	-5.07617	-5.78716	-4.65507	-0.431514	-6.04413	-5.08032	-5.07617
FEZ2	-1.17166	-0.829902	-1.72613	-0.737421	2.39694	-1.48397	-1.17166
FGD2	-5.99639	-6.82577	-6.04787	-0.899379	-7.10685	-6.19839	-5.99639
FGD3	-4.11718	-5.11246	-3.93651	-2.6532	-6.41091	-3.96238	-4.11718
FGD4	-1.81686	-1.74164	-3.09655	-3.24461	0.0333703	-1.59322	-1.81686
FGFR1OP	-0.795382	-0.75974	1.06729	-0.900656	-1.96293	-1.39628	-0.795382
FGFR1OP2	-4.32883	-5.1113	-5.25749	-2.84235	-4.88372	-4.11037	-4.32883
FGL2	-4.47407	-4.81598	-4.49658	-0.376927	-5.85338	-4.26881	-4.47407
FGR	-3.13897	-3.20351	-3.24306	-1.99051	-3.04158	-3.8702	-3.13897
FH	4.71858	4.06788	2.18286	0.484632	3.82524	4.75545	NA
FHL2	-1.42211	-1.84677	-1.42055	0.0102994	-1.96875	-1.07627	-1.42211
FHL3	-3.64384	-3.56147	-3.52554	1.48857	-3.88697	-3.27354	-3.64384
FHOD1	-3.23341	-3.1738	-2.61652	-1.43982	-3.42663	-3.06253	-3.23341
FIBP	-1.71417	-1.90241	-1.72535	-3.18997	-0.817521	-1.51113	-1.71417
FILIP1L	-4.57749	-4.62695	-4.63706	0.435159	-5.54817	-4.27301	-4.57749
FIP1L1	3.83595	3.86243	5.27736	1.99874	1.98278	3.57058	3.83595
FKBP10	0.559068	0.612755	0.47903	2.48193	0.433524	0.244936	NA
FKBP15	-5.92863	-6.26221	-4.82397	-2.0207	-6.77379	-5.92771	-5.92863
FKBP2	-4.63541	-4.72711	-5.07854	-4.29737	-2.79771	-4.26575	-4.63541
FKBP3	1.9236	2.89019	2.67986	0.201772	4.80639	1.69078	1.9236
FKBP4	4.91556	4.75589	2.69032	1.81542	3.4907	4.50848	4.91556
FKBP7	-2.96495	-2.77257	-2.94765	1.69591	-2.1329	-2.51367	-2.96495
FKBP8	1.64401	1.06696	0.861263	-0.456775	2.90601	1.53777	NA
FKBP9	3.22642	3.51436	1.29758	4.90937	3.88819	3.18449	3.22642
FLAD1	5.78723	5.68521	2.71773	2.35879	4.63396	5.48587	NA
FLII	-4.42513	-4.46462	-4.28889	-3.54903	-3.43836	-4.61201	-4.42513
FLNB	-0.771048	-0.595685	-0.700446	-1.09776	-1.82614	-0.382661	-0.771048
FLNC	-3.7083	-4.22425	-3.91211	0.117778	-4.95586	-3.62032	-3.7083
FLYWCH2	4.28549	4.17663	2.85889	3.044	2.99054	4.74965	4.28549
FMN1	-2.2041	-2.18689	-0.73917	-1.96971	-0.776038	-1.7678	-2.2041
FMNL3	-3.02832	-3.57873	-3.23122	0.886523	-4.30061	-2.62221	-3.02832
FMOD	-1.98216	-1.67014	-1.81131	0.955665	-1.18842	-1.75888	-1.98216
FN1	0.171312	0.902257	0.134951	3.47028	1.91029	-0.0500976	0.171312
FN3K	0.816911	0.91298	-0.514438	-0.499159	0.422865	1.14971	0.816911
FN3KRP	-0.671007	-0.670197	-1.74373	0.216282	-1.9692	-0.389103	-0.671007
FNBP1	-6.35506	-7.01585	-5.79251	-0.277555	-8.49356	-6.39409	-6.35506
FNBP1L	2.99995	3.0753	4.79461	0.0635953	3.26933	3.07023	2.99995
FNBP4	3.91625	4.24914	4.19659	3.06681	1.73295	3.35607	3.91625
FNDC1	0.689616	0.236307	0.655513	2.22194	1.5082	0.711492	0.689616
FNDC3A	-3.9413	-4.03451	-4.66233	-3.27653	-3.64155	-3.79941	-3.9413
FNDC3B	0.299182	-0.843171	-1.6029	1.24861	0.00428493	-0.108816	0.299182
FNTA	-1.83872	-1.7729	-4.21132	-0.389842	-2.78259	-1.64417	-1.83872
FOCAD	-3.19712	-3.79511	-1.94163	-2.74139	-4.58573	-3.38981	-3.19712
FOLR2	-7.27062	-8.07482	-7.03536	-2.47183	-8.18197	-6.89718	-7.27062
FOXK1	6.374	7.4088	3.94407	6.36035	5.833	6.02623	6.374
FOXK2	2.87354	2.17741	1.70712	1.76929	0.446192	2.47788	2.87354
FOXP1	-0.54724	-0.275214	-0.457583	-1.26965	-1.22693	-0.227457	-0.54724
FOXP4	3.99378	4.38839	3.19817	2.81407	4.12519	3.60639	3.99378
FOXRED1	1.24676	1.6888	1.81014	0.264419	1.3138	0.708472	NA
FPGS	-0.0476984	-0.141195	0.575802	-0.645128	-1.14715	-0.341927	NA
FRA10AC1	-1.56304	-1.24088	0.0713556	-1.46059	-0.19968	-2.35688	-1.56304
FRG1	-1.60224	-1.50934	1.28618	-0.680824	-2.22367	-2.02922	-1.60224
FRK	1.82718	2.51642	2.68226	0.302962	3.45785	1.53851	1.82718
FRMD8	-3.19807	-3.05983	-3.37401	-1.12605	-3.05902	-2.74608	-3.19807
FRYL	-2.03928	-2.45277	-0.659577	-1.73272	-4.05692	-2.58383	-2.03928
FRZB	-4.49416	-4.94013	-4.45459	-1.86642	-3.21022	-3.8878	-4.49416
FSCN1	-2.14213	-2.12103	-3.14263	0.353116	-0.510623	-2.4322	-2.14213
FTH1	-3.00193	-3.05822	-2.9869	-1.03814	-1.87215	-3.01398	NA
FTL	-2.36789	-1.9274	-2.37576	0.0964626	-0.946654	-2.47878	-2.36789
FTSJ3	2.91346	2.52749	1.64417	1.37029	1.69735	2.41049	2.91346
FUBP1	1.58577	2.02099	3.20798	0.943475	1.82688	1.45397	1.58577
FUCA1	-2.23464	-1.50888	0.306246	-2.20415	0.163763	-1.61751	-2.23464
FUCA2	1.69298	1.68018	2.0636	-0.12255	1.07026	1.64773	1.69298
FUS	6.66086	6.62828	6.16693	3.85562	5.64584	6.51378	6.66086
FUT8	-0.752312	-0.396904	-0.237968	-0.76648	1.84204	-0.850108	-0.752312
FXN	-0.482778	-0.624205	0.756563	-0.766931	-2.27311	-0.4713	NA
FXR2	0.258394	1.83768	5.22709	-0.922446	1.79425	-0.0712693	0.258394
FYCO1	-2.61709	-3.02656	-2.91972	-2.61564	-2.16093	-1.94659	-2.61709
FYTTD1	-0.999459	-1.18983	-1.96153	-1.09172	1.24486	-0.95353	-0.999459
G3BP2	0.0909314	0.803449	2.96084	-0.25766	1.40098	-0.040234	0.0909314
GAA	2.75327	2.84507	1.71428	2.9709	2.89944	3.49093	2.75327
GAB1	-3.44367	-2.79349	-1.78684	-0.827587	-2.53193	-2.96121	-3.44367
GABARAP	-5.46073	-5.24171	-4.07312	-3.91506	-4.79424	-5.72955	-5.46073
GABARAPL2	-2.28647	-1.61601	-1.64179	-0.510228	-1.11884	-2.60698	-2.28647
GABPB1	-1.13352	-1.01294	-0.966014	-0.0487021	-0.987745	-1.01702	-1.13352
GADD45GIP1	4.77573	5.18702	4.56196	2.28025	3.28123	4.56332	NA
GAK	-4.37126	-4.55251	-2.01057	-5.51755	-4.73037	-4.26039	-4.37126
GAL3ST4	-4.09006	-4.39423	-4.06225	-0.777814	-3.9925	-3.90701	-4.09006
GALC	2.54095	2.37644	3.09938	1.59744	3.3074	2.90633	2.54095
GALE	-1.8147	-1.33125	1.70262	-3.45611	-0.356629	-1.45945	-1.8147
GALK1	-0.444978	-0.757123	-1.93583	0.755461	-1.4379	-0.31447	-0.444978
GALK2	-4.51651	-4.43288	-2.7723	-4.42932	-2.61377	-4.1287	-4.51651
GALM	-2.37095	-2.51876	-2.4598	-0.512728	-2.59787	-2.01498	-2.37095
GALNS	-0.756132	-0.442606	0.1433	-1.37451	-0.461714	-0.441372	-0.756132
GALNT1	-2.05417	-2.26934	-0.818751	-2.11066	0.0383865	-2.20739	-2.05417
GALNT10	-0.986021	-1.32753	-0.63612	-1.3543	1.39548	-0.583613	-0.986021
GALNT2	-0.144185	-0.318484	-1.81824	-1.7709	1.11946	-0.265363	-0.144185
GALNT6	0.553488	0.606726	0.463336	-0.703956	1.02906	0.333628	0.553488
GALNT7	-3.23511	-3.9402	-1.68169	-5.18495	0.0409839	-3.28311	-3.23511
GAN	1.15043	2.30144	2.35989	1.64139	1.86612	0.889434	1.15043
GANAB	-0.883844	-0.964951	-1.1089	-1.19099	0.235415	-0.98658	-0.883844
GAPDH	-1.57362	-1.83351	-2.52422	-1.2222	-1.2941	-1.5676	NA
GAPVD1	0.596506	0.670944	2.48271	0.603662	-0.393676	0.126991	0.596506
GAR1	5.06153	5.7695	5.25379	1.9288	3.85745	5.34414	5.06153
GARS	2.06723	2.41239	-0.843224	3.09024	2.26187	1.62655	NA
GART	1.21239	1.21221	3.89012	0.086444	0.920712	0.580723	1.21239
GATAD2A	2.40806	2.46891	1.8084	2.73789	1.889	1.96356	2.40806
GATAD2B	4.16116	3.63532	1.4034	2.42323	3.60011	4.01429	4.16116
GATM	-1.60224	-1.39156	-0.650887	-0.539465	-1.94702	-1.29595	NA
GBA2	-0.885981	-0.555274	-0.92037	-1.1834	-0.342226	-0.788417	-0.885981
GBF1	-5.74955	-5.46222	-3.09903	-5.46037	-3.00712	-5.96331	-5.74955
GCC1	-1.34204	-1.47374	-2.32904	-2.4493	0.824694	-1.10899	-1.34204
GCDH	4.0962	4.0448	3.2763	2.15509	1.77172	4.49636	NA
GCFC2	-0.0502767	0.22871	-1.03081	-0.581757	1.74082	-0.920539	-0.0502767
GCHFR	-1.27499	-1.54345	-0.184377	-1.08112	-0.4328	-1.23805	-1.27499
GCLC	-0.28075	-0.213376	-1.28097	-0.85727	0.0648165	-0.437561	-0.28075
GCLM	1.04358	1.5671	2.0516	0.994743	0.778185	0.612709	1.04358
GDAP1	4.10877	3.92354	1.38882	1.74608	4.86368	4.15978	NA
GDAP2	0.163782	0.390774	0.54148	0.89741	0.251834	0.405371	0.163782
GDE1	-0.865604	-1.37106	-1.17847	-1.17362	1.10926	-0.78296	-0.865604
GDF15	1.60904	1.46894	1.60025	0.871421	1.53452	1.772	1.60904
GEMIN2	5.51164	6.51126	5.98892	3.6066	6.96981	4.59208	5.51164
GEMIN4	3.55253	3.93748	4.39256	1.14094	3.11173	2.88624	3.55253
GEMIN5	3.23323	4.28115	4.90711	3.10395	2.21198	2.59494	3.23323
GEMIN6	1.70188	1.68368	1.70608	0.427812	2.21063	1.39072	1.70188
GEMIN7	1.75012	2.51549	1.75281	0.653942	2.29025	1.54259	1.75012
GET4	4.04665	4.47484	1.86172	3.52332	3.27221	3.72965	4.04665
GFER	2.67034	2.41287	1.04371	2.3615	1.84779	2.86731	NA
GFM1	8.25435	8.97336	5.7863	5.20405	7.15077	7.89317	NA
GFM2	2.65306	3.09779	4.05434	1.04217	1.90846	2.58718	NA
GFPT2	-1.87584	-1.44979	-1.91716	1.24485	-2.22137	-2.74621	-1.87584
GGA1	-3.46903	-2.88663	-1.52978	-4.01596	-1.97449	-3.34233	-3.46903
GGA3	-1.0075	-1.32135	-2.68483	-0.936507	-2.27953	-0.867436	-1.0075
GGACT	-2.62797	-1.94623	-3.17542	-0.488369	-1.9394	-2.28816	-2.62797
GGCX	1.30952	1.34594	1.08529	0.412238	2.0467	1.23147	1.30952
GGPS1	1.44912	1.29022	-1.53454	-0.137527	1.24867	1.83236	1.44912
GGT5	-5.1887	-5.79985	-5.28286	-1.24971	-4.59589	-4.71689	-5.1887
GHDC	-0.796987	-0.782367	-1.04475	-0.694647	-0.00854082	-0.388972	-0.796987
GID8	4.66372	4.3842	3.42319	3.05456	3.80625	4.34401	4.66372
GIMAP4	-6.70111	-7.64676	-6.81194	-1.34919	-8.12071	-6.71491	-6.70111
GIMAP7	-7.45067	-8.32858	-7.5923	-2.11648	-9.43581	-7.48137	-7.45067
GIMAP8	-7.23008	-8.1907	-7.21784	-1.46524	-8.1629	-7.28203	-7.23008
GINS4	6.43923	6.87452	5.68502	5.37235	3.98614	5.01615	6.43923
GIPC1	0.78258	0.78675	-0.527223	-0.927141	-0.176776	0.83315	0.78258
GIPC2	-1.42644	-1.72734	-1.23989	-1.69816	-1.77053	-1.28333	-1.42644
GIT1	-1.20096	-1.25488	-1.13579	-0.15458	-2.84381	-1.05629	-1.20096
GIT2	-6.51307	-7.26487	-6.56734	-1.12709	-8.00567	-6.2475	-6.51307
GLCE	-2.2252	-1.99496	-1.11734	-4.13613	-0.354765	-2.03199	-2.2252
GLE1	3.18405	3.14169	3.26109	1.39263	2.71459	2.95211	3.18405
GLG1	-1.18238	-0.959698	-0.34568	-1.19823	1.42869	-1.04343	-1.18238
GLIPR1	-3.28263	-4.27766	-3.67363	-1.33641	-3.88461	-3.35296	-3.28263
GLIPR2	-4.17201	-5.21836	-4.0632	0.133389	-6.32714	-3.92249	-4.17201
GLMN	0.0197878	-0.00292471	2.26693	-1.52156	-0.729021	-1.10981	0.0197878
GLO1	0.498185	0.906132	-0.21628	0.397121	0.524072	0.808377	0.498185
GLRX	-6.65724	-6.60754	-5.77445	-4.09937	-4.11139	-6.6262	-6.65724
GLRX3	1.92196	2.04271	4.23066	0.541784	2.03282	1.21833	1.92196
GLRX5	5.11726	5.59777	5.84547	2.77819	5.80133	4.94485	NA
GLS	2.08173	2.49281	1.87917	3.65115	1.78513	1.907	NA
GLT8D1	-3.53084	-3.88094	-3.45659	-3.42885	-2.60369	-2.9352	-3.53084
GLTP	0.988355	1.48978	0.655701	-1.30783	2.90827	1.38051	0.988355
GLUD1	-0.0571933	0.129479	1.26471	-1.16	0.232429	0.362085	NA
GLUL	-0.853893	-1.05992	-2.0805	-0.896378	-0.598836	-0.821436	-0.853893
GM2A	-1.41242	-1.59161	-1.1568	-0.732002	-1.89328	-1.02943	-1.41242
GMDS	-2.9273	-3.03405	-3.33872	-4.08506	-1.63712	-2.88708	-2.9273
GMEB2	3.59292	2.80461	0.494285	2.83348	1.63282	3.81505	3.59292
GMFB	-4.43655	-3.96489	-4.08663	-3.13487	-1.33567	-4.22901	-4.43655
GMFG	-7.7369	-8.84775	-8.10088	-2.67375	-8.9144	-7.86799	-7.7369
GMIP	-6.17735	-6.83499	-7.06269	-1.3478	-8.1327	-6.77065	-6.17735
GMPPA	-6.4593	-6.95382	-6.46607	-5.85929	-4.89483	-6.16493	-6.4593
GMPR	0.0107731	-0.123055	-0.366189	-0.294279	-0.383815	0.415679	0.0107731
GMPR2	-1.56152	-1.97619	-1.55691	-1.15918	-1.62252	-1.59259	-1.56152
GMPS	7.58725	7.71997	4.5376	5.28723	5.22202	7.18467	7.58725
GNA11	-1.63538	-1.19482	-0.319564	-2.57373	1.28328	-1.4353	-1.63538
GNA13	-1.78508	-2.13422	-3.54966	-0.87054	-2.13268	-1.81735	-1.78508
GNAI2	-6.12747	-7.49209	-6.29791	-2.56829	-7.17992	-6.14951	-6.12747
GNAI3	-1.57016	-2.30747	-0.227785	-1.42297	-1.1348	-1.87242	-1.57016
GNAQ	-3.10719	-3.12591	-2.09388	-3.61133	-0.702584	-2.84068	-3.10719
GNAS	1.74518	0.589789	-0.445709	0.689268	0.485672	1.91939	1.74518
GNB1	-4.39226	-4.86849	-3.69126	-1.42563	-4.08782	-3.91018	-4.39226
GNB4	-4.23618	-4.47637	-4.78241	2.15372	-4.91133	-3.95227	-4.23618
GNE	-2.6505	-3.46831	-2.40207	-1.86834	-3.78708	-2.84497	-2.6505
GNG11	-3.11417	-3.58329	-3.35183	-0.472824	-2.80754	-2.52359	-3.11417
GNG12	-3.38647	-3.03984	-2.49185	-3.03601	-1.59465	-2.91483	-3.38647
GNG2	-7.318	-8.36292	-7.38609	-3.18656	-7.5184	-7.07014	-7.318
GNL2	3.3593	3.17535	3.93239	1.08298	3.23348	2.71894	3.3593
GNPAT	2.21408	1.76759	-0.255911	0.171196	1.63615	1.98048	2.21408
GNPDA1	-1.08199	-1.59228	-0.560952	1.19531	-2.20544	-0.861394	-1.08199
GNPDA2	-6.17683	-7.09176	-5.02274	-2.89133	-5.40014	-5.68411	-6.17683
GNPNAT1	-1.49745	-1.30723	-0.418101	-3.12886	1.13325	-2.10771	-1.49745
GNPTAB	2.36267	2.12471	2.15086	1.89494	2.24574	2.40383	2.36267
GNPTG	1.02048	1.11893	0.318258	0.310541	1.91253	1.18059	1.02048
GNS	2.48825	2.61634	1.0895	1.85183	2.34664	2.7493	2.48825
GOLGA2	-1.27886	-1.71188	-0.640358	-2.25343	-1.33659	-1.23688	-1.27886
GOLGA4	0.212274	0.162876	0.336166	-0.488424	-0.963963	0.470588	0.212274
GOLGA5	-0.138112	0.430869	0.850587	-1.5467	2.95003	-0.173247	-0.138112
GOLGA7	0.483455	0.781237	-0.254936	-1.54349	2.30447	0.0038078	0.483455
GOLGB1	-0.617534	-0.98242	-1.2421	-1.89681	-0.219955	-0.367261	-0.617534
GOLIM4	0.583737	0.184711	-1.2498	0.378182	1.06495	0.467962	0.583737
GOLM1	-3.13697	-3.1972	-2.51551	-4.62262	-1.11302	-3.04123	-3.13697
GOLPH3	-0.238208	0.0348328	-2.91816	-1.09982	1.3242	-0.244779	NA
GOLPH3L	-0.313397	-1.4499	-2.52408	-3.40758	-0.332226	0.105232	-0.313397
GOLT1B	-0.0411101	-0.902777	-1.45698	-0.4403	0.383958	-0.248972	-0.0411101
GOPC	-0.397662	0.148739	0.524277	1.74461	-0.400234	-0.160791	-0.397662
GORAB	2.12165	1.10709	-1.48024	-0.602803	1.50912	2.69196	2.12165
GORASP1	-2.77319	-3.1173	-2.80585	-3.6308	-3.04128	-2.44923	-2.77319
GORASP2	-2.34297	-2.13247	-2.89802	-3.10575	-1.59675	-2.07272	-2.34297
GOSR1	0.604905	1.17815	0.73885	-1.03068	2.5055	0.489534	0.604905
GOSR2	0.912718	0.838592	0.796875	0.904786	0.874428	0.91245	0.912718
GOT1	-0.537618	-0.0101493	1.02731	-1.42277	0.862717	-0.57289	-0.537618
GOT2	2.16806	2.72314	3.01952	1.86899	3.3944	2.1058	NA
GPAA1	5.39946	4.65018	3.73272	2.71638	5.09467	5.10857	5.39946
GPATCH1	2.85794	3.45752	1.62069	2.73412	3.78006	2.49641	2.85794
GPATCH11	-1.48574	-0.411061	-1.9187	-0.218771	1.30752	-2.18189	-1.48574
GPATCH4	4.12928	3.79495	1.42951	2.26174	2.33047	3.50932	4.12928
GPATCH8	2.7413	3.22973	2.77969	2.09494	2.50851	2.34474	2.7413
GPC1	0.357866	0.413774	0.378513	1.22072	1.51432	0.464959	0.357866
GPC6	-1.69052	-1.88931	-1.60883	1.39746	-1.65612	-2.02922	-1.69052
GPCPD1	-1.49958	-1.48989	-2.47449	-1.30768	-0.233692	-1.75113	-1.49958
GPD1	-1.04552	-1.73264	-1.05728	-0.0628021	-0.502117	-0.812591	-1.04552
GPD1L	-0.159367	-0.262792	-0.199045	-1.19603	0.52775	0.700852	-0.159367
GPD2	2.17175	2.70755	1.80917	-0.726177	4.40607	2.24843	NA
GPHN	1.33509	1.41012	2.42943	-0.406176	3.32209	1.29423	1.33509
GPI	-0.963762	-1.32661	-3.07531	-0.935319	0.666269	-1.18496	NA
GPN1	0.523703	0.462242	0.130032	1.07584	0.43522	0.302669	0.523703
GPNMB	0.87069	1.05759	0.522337	3.35685	1.75287	0.877119	0.87069
GPR107	-0.432457	-0.0618851	0.524015	-0.689861	1.39868	-0.584968	-0.432457
GPR108	-0.522649	-0.604389	-0.163923	-1.15591	-1.23297	-0.151879	-0.522649
GPRC5C	1.74334	1.94026	1.22131	-0.154158	3.23963	2.4667	1.74334
GPRIN3	-5.78104	-6.63129	-5.80119	-3.32003	-7.35042	-5.64337	-5.78104
GPS1	-0.69936	-1.42258	-1.13295	-1.41569	0.0971831	-0.554605	-0.69936
GPS2	-1.19684	-0.221134	0.0328366	-1.762	1.694	-1.21637	-1.19684
GPX7	-0.916421	-0.916087	-0.33483	2.29294	-0.434077	-0.98256	-0.916421
GPX8	-1.56811	-1.8061	-1.47209	0.244185	-1.35671	-1.82383	-1.56811
GRAMD4	-1.21423	-0.481689	0.554506	-1.31714	1.30244	-1.17956	-1.21423
GRB2	-3.62922	-4.25439	-5.39367	-0.594971	-6.33799	-3.88658	-3.62922
GRB7	2.177	2.99261	1.92979	1.37887	4.16697	1.88488	2.177
GREM1	-1.66954	-1.99719	-1.54872	1.0902	-1.6691	-1.80036	-1.66954
GRHL2	8.35489	8.63686	4.94226	4.41973	7.14053	8.20917	8.35489
GRHPR	-2.12514	-2.74453	-1.91631	-1.9228	-3.22153	-1.55198	NA
GRK5	-3.95442	-4.63835	-3.15562	-2.51571	-5.61556	-3.77402	-3.95442
GRK6	-4.18079	-4.08064	-4.13186	-1.57708	-7.11016	-4.79739	-4.18079
GRN	-0.778535	-1.35243	-0.803389	0.488117	-0.265345	-0.686998	-0.778535
GRPEL1	4.20357	4.93128	6.7735	2.40585	2.25255	3.7441	NA
GRSF1	6.06838	6.7799	8.04483	3.56551	5.59302	5.61556	NA
GRWD1	3.45592	3.91406	4.04151	3.15119	-0.382473	3.05975	3.45592
GSDMD	-0.7636	-1.88561	-4.86295	-0.430817	-1.13073	-0.882665	-0.7636
GSK3A	1.17044	1.10223	0.925611	1.07015	0.289779	0.943936	1.17044
GSK3B	2.23804	1.63274	0.955678	0.701457	0.958919	2.0556	2.23804
GSKIP	-1.02941	-0.85275	-0.846307	-1.7528	0.762715	-1.51036	-1.02941
GSN	-6.68783	-6.94015	-6.08433	-0.397674	-6.62209	-6.26223	-6.68783
GSPT1	2.75971	2.9882	1.36551	1.55037	3.01302	2.70288	2.75971
GSR	-4.77063	-3.93033	-2.25563	-5.05551	-2.38065	-4.45874	NA
GSS	1.35596	0.333015	-1.07853	0.233263	-0.239421	1.68045	1.35596
GSTCD	-0.0918067	0.745921	1.77754	-0.707121	2.21775	-0.738559	-0.0918067
GSTK1	0.256847	-0.702554	-2.17557	-1.08257	-1.92554	0.545143	NA
GSTM3	0.752656	0.889065	0.939683	0.304643	1.88995	0.956121	0.752656
GSTO1	-5.06885	-4.81845	-3.78715	-2.76384	-5.3267	-4.82224	NA
GSTP1	-0.933962	-0.548567	-1.12255	-0.706376	1.45995	-0.532517	-0.933962
GSTZ1	-0.920178	-0.421163	0.0961297	-2.78979	2.57667	-0.596111	NA
GTF2A1	2.10295	2.9614	2.56927	1.76534	3.86132	1.76897	2.10295
GTF2B	-4.07918	-4.33611	-1.86121	-3.80487	-3.3472	-4.2936	-4.07918
GTF2E1	1.56195	1.02129	0.781493	1.0503	-0.375912	1.10392	1.56195
GTF2E2	0.347354	1.17734	2.93877	0.361082	-0.196461	-0.425622	0.347354
GTF2F2	1.49864	1.56097	0.978691	0.662439	0.0769617	1.31689	1.49864
GTF2H1	0.694266	1.5487	1.81472	0.7225	1.94814	-0.0310339	0.694266
GTF2H5	0.481948	0.746326	0.568803	0.917579	-0.55599	0.0118678	0.481948
GTF2I	5.16807	5.8015	3.00849	2.05486	4.96305	4.99196	5.16807
GTF3C1	6.9676	7.70077	6.3774	4.58312	6.51328	6.64548	6.9676
GTF3C2	6.30266	6.84206	5.545	3.91459	6.02941	5.9572	6.30266
GTF3C3	7.72249	7.82156	7.68006	4.29423	5.4873	7.38985	7.72249
GTF3C4	6.96271	7.56855	8.21511	4.36464	6.01916	6.59948	6.96271
GTF3C5	5.89596	6.32893	6.54971	3.59283	4.45689	5.41945	5.89596
GTF3C6	2.34589	2.23891	3.16289	1.4819	0.783685	1.85701	2.34589
GTPBP10	8.38427	8.15277	6.55719	5.24063	5.95987	8.10023	NA
GTPBP2	1.50712	1.2946	0.774661	1.23288	0.101882	0.720744	1.50712
GTPBP3	3.48122	3.99916	2.37642	2.73278	2.22092	3.39568	NA
GTPBP4	4.63941	4.13246	4.38654	2.35245	2.85521	4.06665	4.63941
GUF1	1.22372	0.573857	2.63976	0.27106	-0.0325065	1.0521	NA
GUK1	-0.847768	-1.13541	-2.63896	-0.789314	-1.88913	-0.346664	NA
GULP1	-2.76723	-3.74298	-2.78089	-0.703667	-3.70426	-2.31405	-2.76723
GUSB	0.242693	0.20777	-1.09683	-0.38576	3.30351	0.52532	0.242693
GXYLT1	0.890912	1.1157	-0.125122	0.887683	1.16203	-0.0147382	0.890912
GYG1	-6.29989	-6.83209	-7.44885	-3.78695	-6.00598	-6.16272	-6.29989
GYPC	-1.9829	-2.21844	-1.99543	-0.42301	-1.32844	-1.85193	-1.9829
GYS1	-1.58842	-2.02326	-1.17006	-1.39237	-2.143	-1.69542	-1.58842
H1F0	-1.64555	-1.86655	-1.26379	-1.86418	-1.16571	-1.16357	-1.64555
H1FX	-4.00777	-4.45649	-4.4424	-3.40411	-3.77341	-3.84238	-4.00777
H2AFY	1.34657	0.64386	2.3085	-0.264001	-0.313817	1.98889	1.34657
H6PD	-2.25302	-2.09448	0.027086	0.655031	-1.74861	-1.85347	-2.25302
HAAO	-4.53949	-4.86683	-4.69694	0.644294	-5.07686	-4.06959	-4.53949
HABP4	-2.62208	-2.96215	-2.10373	-0.744742	-3.48684	-2.11523	-2.62208
HADHA	1.18224	1.57937	0.396989	-0.0358113	1.78436	1.69631	NA
HADHB	0.415138	1.14482	-0.525752	-0.318408	0.8255	0.876667	NA
HAGH	0.870642	0.797643	-0.395359	0.525537	0.053659	1.42556	NA
HAT1	1.9637	2.04643	1.74816	0.202871	1.63561	0.977268	1.9637
HAUS1	-0.958615	-0.574969	-0.553706	-0.102611	-1.31043	-2.18575	-0.958615
HAUS2	-1.20728	-0.883899	-0.828406	-0.656879	0.206456	-1.84079	-1.20728
HAUS5	0.698971	0.515215	0.442899	0.718649	0.0290686	-0.464863	0.698971
HAUS8	0.347379	0.203669	-0.0781991	-0.0388945	-0.885868	-1.18217	0.347379
HAX1	5.96374	5.60426	4.26506	2.58718	5.04424	5.67282	5.96374
HBB	-1.20406	-0.541737	-1.06919	-1.1425	0.293629	-1.21563	-1.20406
HBS1L	0.154511	0.500668	0.465819	-0.22966	0.627077	-0.0972301	0.154511
HDAC1	2.69765	2.82698	4.17052	0.878079	1.80899	2.60716	2.69765
HDAC2	4.96715	5.18506	5.54622	3.82577	4.26833	4.58161	4.96715
HDAC4	-1.461	-1.05449	-1.34943	0.584354	-0.336294	-1.2932	-1.461
HDAC7	-3.23516	-3.43169	-4.33733	-1.19336	-4.56247	-3.08374	-3.23516
HDDC2	-2.04545	-1.96851	-1.41621	-2.85984	-2.15	-1.62876	-2.04545
HDDC3	-2.49473	-2.55338	-1.69481	-1.5283	-2.64831	-1.85829	-2.49473
HDHD2	-3.60101	-3.31653	-2.2017	-2.54437	-4.06764	-3.03005	-3.60101
HDHD3	1.63097	1.58009	2.37931	0.34371	-0.611178	2.02968	NA
HEATR1	6.10086	6.14693	5.69431	3.34143	4.59969	5.59823	6.10086
HEATR3	2.24501	3.86937	2.7336	1.75885	2.99956	1.51158	2.24501
HEBP1	2.38329	1.87459	1.37845	0.989606	1.41265	2.81788	NA
HEBP2	-2.69983	-2.76992	-2.26934	-1.94661	-2.771	-2.10548	-2.69983
HECA	-1.81302	-1.96997	-1.14715	0.362166	-4.73937	-0.872034	-1.81302
HELLS	1.56532	1.89685	2.47737	1.39786	1.42856	0.699302	1.56532
HELZ2	1.68704	1.84316	-0.944339	2.19545	0.387016	1.07456	1.68704
HERPUD1	-1.91371	-0.886669	-1.35793	-0.438986	-0.565081	-2.00547	-1.91371
HEXIM1	1.20251	2.1281	0.855575	0.277028	2.75337	0.843838	1.20251
HGD	-0.755309	-1.62383	-0.817663	-1.81277	-1.90745	-0.503687	-0.755309
HIBADH	4.5018	4.01692	0.781576	2.29697	3.24683	5.12024	NA
HIBCH	1.41554	1.67709	0.959692	-0.907696	0.905921	1.98044	NA
HID1	-0.990573	-1.0892	-1.60984	-2.81908	-0.600924	-0.711261	-0.990573
HIF1AN	-2.65916	-2.42362	-0.6842	-1.30261	-1.94774	-2.64904	-2.65916
HINT1	-0.58296	-0.45343	1.61598	-0.349208	-1.35087	-0.36044	NA
HINT2	2.36553	2.73223	2.47419	1.21281	2.78004	2.61651	NA
HINT3	1.26607	1.80743	1.73152	-0.610986	0.809161	1.79888	NA
HIP1	0.795208	0.870627	-0.478486	2.18051	0.802293	1.27129	0.795208
HIRIP3	4.4627	4.36364	2.56782	3.54059	3.50589	4.11949	4.4627
HIST1H1C	-2.13471	-1.99927	-1.9819	-2.01815	-1.9624	-1.99058	-2.13471
HK1	-1.83627	-1.87343	0.020807	-1.82656	-1.65061	-1.6807	NA
HK2	2.48004	2.31603	1.81394	1.07295	2.12215	1.79537	NA
HK3	-2.42095	-2.1102	-2.48918	0.865012	-3.03404	-3.06675	-2.42095
HLCS	0.88683	1.22576	3.21402	0.0332942	1.64963	1.00371	0.88683
HLTF	5.43201	4.83569	2.60234	2.95461	4.20136	4.42697	5.43201
HMBS	-0.444438	0.271347	1.00634	-1.75422	0.568169	-0.621617	NA
HMG20A	1.82548	1.92076	2.70477	0.93944	1.34894	2.01109	1.82548
HMGA1	0.0414508	0.229984	-0.405724	-1.33106	-0.304142	-0.013848	0.0414508
HMGB1	0.801768	0.595154	-0.444393	0.790792	-0.820588	1.19045	0.801768
HMGB2	-1.09022	-0.395846	0.102921	-0.962546	-0.561462	-1.93827	-1.09022
HMGCL	0.344263	0.991419	3.90708	-1.45057	1.4411	0.824957	NA
HMGCS1	2.10532	2.06018	0.466651	0.818596	1.5562	1.61438	2.10532
HMGCS2	1.03784	0.880228	1.00258	0.405312	0.652193	1.23085	NA
HMGN1	-2.32346	-1.85188	-0.51394	-2.54929	-2.18051	-2.01071	-2.32346
HMGN2	-4.20015	-3.73909	-2.79753	-4.41016	-2.67854	-3.96643	-4.20015
HMGN3	1.1663	1.71421	1.14365	0.284367	0.638411	1.40535	1.1663
HMGN4	-5.67125	-5.99236	-5.59349	-4.00427	-6.00053	-5.13293	-5.67125
HMGXB4	1.5803	1.98495	2.3932	0.533353	0.989225	1.24883	1.5803
HMOX1	-2.73206	-3.09308	-1.96351	0.392402	-3.49817	-3.04523	-2.73206
HMOX2	2.6168	1.90563	1.55892	1.45471	2.26799	2.4655	2.6168
HNMT	-4.71288	-5.32085	-4.81936	-1.51003	-4.2262	-4.10067	-4.71288
HNRNPA0	2.69795	3.26225	3.5927	2.61888	1.00326	2.7615	2.69795
HNRNPAB	4.54964	5.23957	5.65607	2.65538	3.78427	4.12464	4.54964
HNRNPD	-1.18966	-0.691035	-0.715888	-1.84555	-0.051704	-1.00149	-1.18966
HNRNPDL	2.60214	2.96924	3.31498	1.64896	2.63117	2.62635	2.60214
HNRNPF	1.19809	1.69696	3.18468	-0.325443	0.322732	0.716607	1.19809
HNRNPK	2.54663	2.63413	3.20307	1.88435	2.03293	2.52679	2.54663
HNRNPLL	1.70475	2.17737	1.4537	0.970809	3.24265	1.7835	1.70475
HNRNPR	0.294083	0.601168	1.85177	-1.4806	3.52428	0.344329	0.294083
HNRNPUL1	2.21416	2.46492	1.87956	1.65165	1.16706	2.46933	2.21416
HOOK2	0.994401	0.838959	0.584124	-2.93346	2.70713	1.34106	0.994401
HOOK3	-0.582912	-0.735455	-2.1538	3.37446	-2.39851	-0.120724	-0.582912
HOPX	-2.13462	-2.37566	-2.01639	1.74518	-1.14947	-1.63219	-2.13462
HP1BP3	-3.44141	-3.81293	-1.2571	-3.32698	-2.87285	-3.13567	-3.44141
HPCAL1	-0.397509	-0.68639	-1.01038	1.62777	-0.390427	-0.164645	-0.397509
HPGD	1.34384	1.4695	2.10609	0.736923	1.16207	1.74216	1.34384
HPS6	-2.65055	-2.18125	-1.14344	-0.831818	-3.29188	-2.69456	-2.65055
HS1BP3	0.704678	1.01862	-0.420208	2.21965	1.34791	1.03521	0.704678
HSBP1	1.93725	1.91418	2.46386	0.840905	1.87869	2.40015	1.93725
HSCB	-1.40132	-0.325886	0.552851	-2.17642	-0.557074	-1.35154	NA
HSD11B2	2.23692	2.37934	2.68956	0.735691	2.71638	2.34179	2.23692
HSD17B4	-0.331855	0.222075	1.5443	-1.4904	-0.265957	-0.370976	NA
HSD17B7	3.56335	3.17333	1.3443	0.626632	2.7724	3.69147	3.56335
HSDL1	2.4071	4.39723	4.52981	1.75416	4.46208	2.34327	NA
HSDL2	2.80695	2.83624	3.80366	1.14337	1.79321	3.15893	NA
HSF1	7.03606	5.89457	0.854768	5.21336	3.82099	6.87399	7.03606
HSP90AA1	4.35567	4.91587	5.21576	2.29185	5.35553	3.79748	4.35567
HSPA12A	-4.81082	-4.89423	-4.26264	-2.32239	-4.86813	-4.21363	-4.81082
HSPA13	-1.90625	-2.2351	-0.957491	-0.359612	-2.35663	-2.13603	-1.90625
HSPA14	5.78564	5.75472	6.32562	3.71715	3.41483	5.29035	5.78564
HSPA2	-1.40364	-0.940072	-0.924065	-1.68868	0.451269	-1.24214	-1.40364
HSPA4	0.116002	1.03966	3.11677	-0.990326	-1.07756	-0.130493	0.116002
HSPA5	-2.75582	-2.80146	-2.26069	-2.04394	-2.33012	-2.94998	-2.75582
HSPA6	0.72648	0.896111	1.00086	0.471414	0.763467	0.635897	0.72648
HSPA9	5.91726	6.76979	8.22907	3.48191	4.41226	5.62382	NA
HSPB1	2.46712	1.95289	1.04475	2.67589	0.834668	2.92426	2.46712
HSPB11	-1.1788	-0.603998	-0.428397	-1.15876	-0.411874	-1.80807	-1.1788
HSPB8	-0.289383	-0.858969	-0.454268	1.196	-2.88425	0.114695	-0.289383
HSPBP1	4.66401	4.54797	4.62188	3.43884	2.774	4.16208	4.66401
HSPD1	6.52129	6.97623	6.46119	3.28931	4.8617	6.09094	NA
HSPG2	-3.71768	-3.42606	-2.58686	0.511246	-2.84746	-3.25249	-3.71768
HSPH1	4.1174	3.79832	3.40232	3.67992	1.25128	3.84332	4.1174
HTRA1	-1.7834	-2.03733	-1.80247	0.162906	-1.75915	-1.42123	-1.7834
HTRA2	3.20293	3.50924	2.39207	2.2483	2.65775	3.5307	NA
HTRA3	1.08922	0.841254	0.809398	2.18379	1.78978	0.870968	1.08922
HUS1	4.94615	4.8249	3.59726	3.56606	5.2597	4.38381	4.94615
HYOU1	-1.45388	-1.07091	-0.136415	-2.08374	-0.128991	-1.6298	-1.45388
IAH1	-4.66736	-5.37989	-5.30072	-3.30786	-4.78505	-4.08479	-4.66736
IARS	0.526018	0.96336	2.21465	-1.41164	-0.098233	0.00782802	0.526018
IARS2	6.95472	6.83825	5.25615	3.36816	5.38261	6.9855	NA
IBA57	4.34568	4.01609	2.07297	2.3659	4.20511	4.83389	NA
ICAM1	-1.38538	-1.26021	-1.62637	1.24724	-0.970638	-1.59931	-1.38538
ICAM2	-3.75593	-4.64279	-3.901	-1.26284	-3.30883	-3.46841	-3.75593
ICAM3	-5.80931	-6.53265	-5.80847	-2.49079	-6.26509	-6.01878	-5.80931
ICMT	-0.834419	-1.05912	0.898019	-1.14868	-0.610371	-1.15446	-0.834419
IDE	0.246361	0.750877	3.34926	-1.28446	0.971229	-0.205357	NA
IDH1	-1.87913	-1.70044	-2.07512	-3.26607	-1.35774	-1.6657	NA
IDH2	2.46636	2.04955	3.37204	1.36808	2.00734	2.49004	NA
IDH3A	-0.171198	0.389496	1.92742	-0.364049	-0.570463	0.018319	NA
IDH3B	1.63824	2.2288	1.14715	1.09215	-0.0242804	1.66593	NA
IDNK	-4.69946	-5.1079	-3.91113	-3.92885	-3.50203	-4.1143	-4.69946
IER3IP1	0.706654	0.752945	1.53904	0.372208	0.789903	0.57502	0.706654
IFI35	-6.09399	-5.89371	-6.09085	-3.06571	-4.61023	-6.69388	-6.09399
IFIT1	-0.637423	-1.21198	-0.0776984	1.15461	-2.01659	-0.753236	-0.637423
IFIT2	-1.67038	-2.14826	-0.999895	0.625465	-2.9565	-1.79368	-1.67038
IFIT3	-1.7609	-2.33293	-1.14488	0.801628	-3.26105	-1.93512	-1.7609
IFIT5	-4.03717	-4.6855	-2.98853	-0.7822	-4.91459	-3.97412	-4.03717
IFITM3	-1.58002	-2.24152	-0.559032	-0.350402	-3.28335	-1.5165	-1.58002
IFNGR1	-1.14791	-0.894245	-0.216073	-0.422315	-1.02356	-1.15986	-1.14791
IFT20	0.159527	-0.125325	0.0628733	-0.613533	-0.519712	0.924459	0.159527
IFT27	-0.59461	-0.356915	0.838975	-0.67362	-0.922925	-0.374655	-0.59461
IFT74	-0.655637	-0.221594	-0.119425	-2.28976	0.679042	-0.0406262	-0.655637
IGF1R	1.55282	1.31576	1.78633	0.500011	1.28526	1.68409	1.55282
IGFBP3	-0.731521	-0.299062	-1.32148	0.811646	1.60997	-0.847512	-0.731521
IGFBP4	-3.53093	-3.94114	-3.69205	-2.18355	-1.22006	-3.2382	-3.53093
IGFBP5	2.12127	1.90567	2.12056	2.01498	1.872	2.1576	2.12127
IGFBP6	-2.64467	-2.88757	-2.62709	-1.52109	-1.48717	-2.00337	-2.64467
IGFBP7	-1.70548	-1.8879	-1.42015	0.931299	-2.86756	-1.24491	-1.70548
IGSF8	1.03137	0.181118	-0.90425	-0.858287	0.572657	1.23237	1.03137
IKBIP	-1.37723	-1.28932	-1.52246	1.82199	-0.443146	-1.7245	-1.37723
IKBKB	-1.15319	-1.78461	-5.28318	-0.870884	-2.86079	-0.894593	-1.15319
IL16	-9.20012	-9.91465	-8.91634	-3.00175	-9.68006	-9.11068	-9.20012
IL18	-2.85301	-3.06518	-2.37016	-1.30147	-3.80238	-2.9797	-2.85301
IL33	-5.90379	-6.82857	-5.66975	-4.20039	-5.02821	-5.10775	-5.90379
ILF2	6.31932	5.81865	5.21287	2.81882	5.43099	6.13117	6.31932
ILF3	2.52932	3.11725	2.3232	2.36377	0.98761	2.40557	2.52932
ILK	-5.07909	-5.56341	-4.61946	-0.0383909	-6.58738	-4.55329	-5.07909
ILKAP	3.17186	3.05991	3.58139	0.915676	0.685455	2.74062	3.17186
ILVBL	2.78051	2.36769	1.48063	2.41091	0.668801	2.88461	2.78051
IMMT	3.06927	3.50796	2.50502	0.891216	2.89149	3.28868	NA
IMP3	4.59376	4.64908	4.77822	2.94774	2.60163	4.15996	4.59376
IMP4	4.71138	4.75806	4.71187	2.93463	3.37438	4.12319	4.71138
IMPA1	-0.581738	-0.896821	-3.41738	-0.468592	-1.01882	-0.214806	-0.581738
IMPA2	1.73379	2.00827	3.20549	0.534439	0.744299	1.52991	1.73379
IMPAD1	1.89208	1.08405	-0.873544	-0.168724	2.487	1.66132	1.89208
IMPDH1	-0.611604	-0.723133	-2.03909	0.471752	-2.59782	-1.21748	-0.611604
IMPDH2	0.315275	0.493329	0.48309	-0.383155	-0.760321	-0.257652	0.315275
INF2	-1.58807	-1.98809	-1.48585	-1.30383	-1.09493	-1.77609	-1.58807
INIP	1.5615	1.77149	1.90245	0.627877	0.470764	1.00434	1.5615
INO80E	1.18693	0.639251	1.09137	0.262718	1.02876	1.28697	1.18693
INPP1	-6.75386	-7.25722	-7.20052	-5.39811	-4.43936	-6.51085	-6.75386
INPP4A	-2.1114	-1.85135	-2.94806	1.62319	-2.74982	-1.97957	-2.1114
INPP4B	-0.863004	-0.928318	0.58488	-0.538389	-0.499683	-0.692261	-0.863004
INPP5A	-0.280525	-0.487721	0.712198	-1.06227	-0.66901	0.145784	-0.280525
INPP5K	-5.36143	-4.4756	-2.36717	-3.28373	-3.25456	-5.15171	-5.36143
INPPL1	2.15757	1.75208	0.404925	2.17359	1.53429	1.93274	2.15757
INSR	1.68905	2.21945	2.4774	1.17623	2.01795	1.84624	1.68905
INTS12	3.83131	4.01564	3.44421	1.85025	3.76251	3.67144	3.83131
INTS7	4.39932	4.08676	3.12242	1.33208	3.74261	3.97277	4.39932
INTS8	4.30794	4.68264	4.45115	2.4094	3.55094	3.82886	4.30794
IP6K1	-0.247118	-0.757507	0.166352	-0.387876	-1.95985	0.15004	-0.247118
IPO13	0.536084	0.64012	1.1589	0.476062	0.355763	0.288925	0.536084
IPO5	4.61061	4.41216	3.42409	2.81111	2.04781	4.14333	4.61061
IPO7	4.79506	5.36744	6.85053	3.25175	4.17165	4.26852	4.79506
IPO8	1.65143	1.61441	-0.484016	0.446761	2.09316	1.04216	1.65143
IPO9	4.62244	4.53687	2.3111	2.50174	4.91738	4.1206	4.62244
IQCB1	-0.56258	-0.416215	-0.889396	-0.326901	-0.331939	-0.550848	-0.56258
IQSEC1	0.275553	0.141834	0.202616	0.85686	-0.415727	0.534435	0.275553
IRAK4	-3.21919	-3.35281	-4.66811	-0.469636	-3.37594	-3.10276	-3.21919
IRF2	-4.31062	-4.16309	-1.91103	-1.80456	-4.24085	-3.9969	-4.31062
IRF2BP1	5.59671	5.09512	5.84478	2.96705	4.80173	5.5916	5.59671
IRF2BPL	4.02299	5.25801	5.34842	3.69834	5.17973	4.01451	4.02299
IRF3	-0.423423	-0.583573	0.109327	1.46464	-3.55803	-0.68235	-0.423423
IRF6	3.33347	3.13682	1.43202	-0.0862591	2.84934	3.61622	3.33347
IRGQ	1.12257	0.993772	0.620667	0.847618	1.74843	0.782465	1.12257
IRS1	-1.76402	-1.82382	-1.5908	-2.09351	-2.09401	-1.74242	-1.76402
IRS2	2.47945	2.50107	2.04796	1.67405	3.21779	2.42712	2.47945
ISCA2	2.73954	3.36078	3.77307	1.87501	3.12137	3.0126	NA
ISCU	4.8777	5.03528	4.68299	3.47848	3.13706	5.22859	NA
ISG20	-5.69553	-6.06894	-5.27066	-2.85186	-6.20256	-6.08067	-5.69553
ISG20L2	3.61234	3.7216	1.21897	2.41012	2.92787	3.10737	3.61234
ISLR	-0.539153	-0.570064	-0.388816	2.86979	0.244188	-0.183043	-0.539153
ISOC1	-1.12766	-1.01371	0.334763	-1.37119	-1.66953	-0.955414	-1.12766
ISOC2	2.3199	2.93253	2.07447	2.51007	2.40829	2.72493	NA
IST1	-5.68971	-5.18074	-5.33985	-3.57546	-3.82812	-5.31739	-5.68971
ISYNA1	1.91599	1.02465	1.2938	1.50724	3.15656	1.75856	1.91599
ITGA11	0.109298	-0.0139238	-0.0837049	2.42276	0.248571	0.0524186	0.109298
ITGA2	-0.824664	-0.599991	-0.651825	-1.26542	-0.194261	-1.04015	-0.824664
ITGA3	-2.7796	-3.05191	-2.99083	-4.44898	-1.67444	-2.70679	-2.7796
ITGA4	-6.51687	-6.43294	-6.44225	-1.84067	-6.33971	-6.48966	-6.51687
ITGA5	-1.39184	-1.87262	-1.64682	1.70058	-1.55761	-1.76334	-1.39184
ITGA6	-4.80805	-5.47637	-5.64426	-6.09212	-3.76585	-4.72324	-4.80805
ITGA7	-3.23697	-4.20132	-3.22801	-0.601999	-2.93507	-2.84506	-3.23697
ITGAL	-5.4299	-5.84436	-4.77822	-1.33426	-6.02104	-5.64098	-5.4299
ITGAM	-3.28977	-3.64838	-3.0492	-0.540301	-2.25666	-3.9046	-3.28977
ITGAX	-4.26439	-4.12375	-3.76802	-0.278632	-3.95074	-4.60455	-4.26439
ITGB1	-2.05331	-2.32234	-2.22528	-0.999094	-1.74162	-2.08019	-2.05331
ITGB2	-4.45066	-5.01578	-4.34204	-0.865045	-4.27867	-4.99332	-4.45066
ITGB3	-1.90822	-1.38367	-1.97811	-0.381169	0.28657	-2.09243	-1.90822
ITGB4	-3.56239	-3.99103	-3.64061	-5.28744	-2.41986	-3.51224	-3.56239
ITGB5	-1.817	-1.89535	-2.49056	-0.171664	-0.390236	-1.70796	-1.817
ITGB6	-2.6046	-2.52965	-3.11525	-2.43838	-2.28659	-2.54004	-2.6046
ITIH5	-3.57943	-4.29778	-3.54199	-1.5183	-3.06381	-3.05489	-3.57943
ITM2B	-1.76481	-1.76463	-2.20148	-3.05265	-0.899298	-1.56998	-1.76481
ITPA	1.35968	1.06518	-0.676471	0.0852943	0.220915	1.47154	1.35968
ITPK1	-0.743316	-0.420232	-0.141614	-0.530335	-0.123334	-0.786271	-0.743316
ITPKB	0.530416	0.754403	-1.6878	2.98063	-0.430429	0.882931	0.530416
ITPKC	-0.376046	-0.441858	-1.24221	-0.0938405	-1.97576	-0.511436	-0.376046
ITPR2	-0.541571	-1.15056	-1.56664	-1.72515	-0.477159	-0.326524	-0.541571
IVD	-1.79107	-1.33905	0.247938	-3.1094	0.106369	-1.29895	NA
IVNS1ABP	-0.238376	-0.600115	-1.82023	-1.18779	0.434989	-0.538142	-0.238376
IWS1	4.14897	4.73847	4.3059	2.30242	2.99644	3.84511	4.14897
JAG1	-0.406994	-0.758231	-1.30538	-1.20562	0.46083	-0.291168	-0.406994
JAGN1	0.319192	-0.282093	0.339908	-0.85298	-0.583657	0.293446	0.319192
JAK1	-6.59285	-6.74879	-5.10648	-3.66182	-6.60272	-6.2926	-6.59285
JMJD6	2.99409	3.19974	1.15374	2.67845	1.01932	2.18336	2.99409
JUNB	-1.69189	-2.07573	-2.13061	-0.356208	-2.03088	-2.2263	-1.69189
JUND	-0.363509	-0.205466	-1.28928	0.925531	-0.377591	-0.406063	-0.363509
JUP	2.48068	2.80606	2.39785	-0.874477	0.742808	2.45475	2.48068
KALRN	1.1751	1.39214	1.03094	1.4514	1.01088	1.05701	1.1751
KANK1	0.608096	0.576712	0.911242	0.247709	1.00738	1.21872	0.608096
KANK2	-4.25292	-4.68291	-4.33368	-0.031386	-6.52626	-3.77364	-4.25292
KAT5	-1.4385	-1.28592	-1.51823	-0.823527	0.0286138	-1.42998	-1.4385
KAT7	4.89591	5.23774	4.35875	3.71639	3.94871	4.93268	4.89591
KAT8	3.50764	3.48878	1.21139	2.51106	3.0151	3.47514	3.50764
KATNA1	-1.33373	-0.331186	-0.669195	-1.40458	0.474472	-1.64457	-1.33373
KBTBD11	-3.761	-5.04449	-3.05971	-2.26988	-3.80883	-3.2487	-3.761
KCNMA1	-3.10567	-3.64553	-3.11502	-1.85339	-2.14832	-3.0451	-3.10567
KCTD10	-2.11711	-2.34616	-2.20042	0.240751	-2.7033	-2.06916	-2.11711
KCTD12	-6.3452	-6.234	-6.92775	-0.174013	-6.2603	-6.00267	-6.3452
KCTD21	-0.468116	-1.20272	-2.50528	-0.075469	-1.05526	-0.134192	-0.468116
KCTD5	-1.05619	-0.841964	-1.60168	0.232344	-1.56247	-2.02353	-1.05619
KDM2A	4.55976	4.95863	3.80369	2.97506	4.42013	4.02376	4.55976
KDSR	-1.79543	-1.78178	1.46279	-1.00559	-1.87265	-1.76884	-1.79543
KEAP1	0.368945	-0.0486827	-0.482744	-1.37944	0.589155	0.180215	0.368945
KHDRBS1	1.66183	1.99069	3.57609	0.347666	1.80252	1.42692	1.66183
KHK	1.9067	1.12843	1.56024	1.58991	1.80529	1.93135	1.9067
KHNYN	-1.3053	-1.46585	-1.46587	-2.20046	0.269409	-1.36127	-1.3053
KIAA0319L	0.554969	0.845337	1.78155	-1.86141	2.66778	0.901251	0.554969
KIAA0930	-3.75516	-3.701	-2.03728	-0.583076	-3.73587	-4.02282	-3.75516
KIAA1143	2.06331	1.66673	2.55494	1.1636	0.381603	2.03799	2.06331
KIAA1191	-0.393987	-0.264033	0.482683	-0.172541	-0.15822	0.247203	-0.393987
KIAA1211	-2.55474	-2.57826	-2.32741	-0.443532	-1.98096	-2.41358	-2.55474
KIAA1217	2.26484	2.57587	2.56616	1.06685	1.1184	2.68155	2.26484
KIAA1324	0.375772	0.316709	0.398597	-1.86283	1.89172	0.5606	0.375772
KIAA1522	-1.42769	-0.782351	0.529502	-4.63029	0.978243	-1.17341	-1.42769
KIAA2013	-1.1737	-2.17283	0.249895	-3.19747	-0.25069	-1.22134	-1.1737
KIF11	4.23019	4.71234	5.47631	3.06622	3.49163	3.10232	4.23019
KIF13B	-6.18958	-5.9119	-4.18475	-6.65939	-3.94728	-5.81755	-6.18958
KIF16B	1.80237	1.22621	-0.086385	-0.365423	0.924352	2.61916	1.80237
KIF1B	-2.04286	-1.01096	-0.0327882	-2.32199	-0.147928	-2.20245	NA
KIF1C	-4.78788	-3.5205	-1.52989	-3.76925	-3.45812	-4.51458	-4.78788
KIF21A	3.861	4.30121	2.90519	1.97629	3.13633	3.5176	3.861
KIF22	4.41221	4.93196	4.1077	3.94606	2.94328	3.03536	4.41221
KIF2A	-0.0485185	0.294584	2.17439	0.331273	-1.77062	-0.385006	-0.0485185
KIF3A	4.60243	4.84738	6.09155	1.96733	3.95416	4.79419	4.60243
KIF3B	5.34835	4.25449	1.76505	1.74007	3.18809	5.48316	5.34835
KIF5B	1.51101	1.62683	1.81977	-0.455594	1.26314	1.44673	1.51101
KIFAP3	3.66172	3.82266	3.21367	1.38336	3.26022	3.83167	3.66172
KIN	2.99141	2.9257	2.50588	2.40264	0.443669	2.31084	2.99141
KLC2	2.61405	2.47691	2.17549	0.169638	3.20429	2.37791	2.61405
KLF3	0.402981	0.752899	1.31031	-1.89633	2.03232	0.754749	0.402981
KLHDC4	0.292996	2.08701	2.06143	1.46282	2.15744	-0.347328	0.292996
KLHL36	-2.68598	-1.67375	-1.44011	-0.759981	-1.18	-2.0043	-2.68598
KLHL42	-1.55303	-1.93732	-2.02818	-1.07761	-1.45704	-1.31747	-1.55303
KLHL9	0.721384	0.539769	1.81673	-0.893155	0.954496	0.609884	0.721384
KNOP1	4.22983	4.44986	3.56883	2.29675	1.57819	3.47566	4.22983
KNTC1	3.99701	4.36784	3.9341	2.89799	3.38985	2.82372	3.99701
KPNA1	2.1919	1.94553	0.415326	1.81964	0.551613	1.78943	2.1919
KPNA2	4.65287	4.85147	4.209	3.6148	3.21485	4.01762	4.65287
KPNA3	1.78309	1.63411	1.22669	1.6859	-0.95955	1.50155	1.78309
KRAS	2.24777	1.99659	0.358734	-0.108328	2.42303	2.19941	2.24777
KRI1	3.54429	3.8536	2.88452	1.77293	2.23335	3.18285	3.54429
KRR1	4.97614	5.21161	4.3518	2.53687	3.19018	4.44234	4.97614
KRT18	1.3683	1.88374	0.68816	-0.621182	2.71725	1.52931	1.3683
KRT23	1.47441	1.42558	1.4237	1.38794	-0.201615	1.78895	1.47441
KTN1	0.584477	0.969036	1.16057	-0.893662	2.72671	0.868032	0.584477
L2HGDH	4.1138	4.44321	5.05097	0.727401	5.5182	3.8146	NA
L3HYPDH	-3.43242	-3.58826	-3.34722	1.58741	-2.90869	-3.24222	-3.43242
LACC1	-2.4186	-2.65709	-2.06675	2.11484	-4.63333	-2.61945	-2.4186
LACTB	-4.07824	-3.67057	-3.13819	-0.908193	-4.47166	-4.18694	NA
LACTB2	4.90787	4.48075	0.77859	3.0019	2.77624	4.84855	NA
LAIR1	-4.22767	-4.75957	-4.20387	-0.462564	-4.99911	-4.61262	-4.22767
LAMA3	-3.33198	-3.78626	-2.68095	-3.67366	-1.74258	-3.2294	-3.33198
LAMB1	-1.60215	-2.00514	-1.32468	1.00286	-1.55382	-1.62079	-1.60215
LAMB2	-3.08673	-3.81474	-3.02683	-0.870838	-3.45811	-2.53043	-3.08673
LAMC1	-2.24308	-2.37053	-2.08081	0.648847	-1.56566	-2.04502	NA
LAMC2	-3.24263	-3.62599	-3.36796	-2.67731	-2.86493	-3.39834	-3.24263
LAMP1	0.528663	0.63982	-0.755025	-0.146847	0.143105	0.863733	0.528663
LAMTOR2	-1.50636	-1.48089	-0.372621	-0.851505	-1.28079	-1.04862	-1.50636
LAMTOR3	-2.68817	-2.29195	-1.4287	-1.74738	-1.36491	-2.29434	-2.68817
LAMTOR4	-1.00354	-1.11654	-1.25375	-0.432308	0.0206656	-0.615024	-1.00354
LAMTOR5	-1.44073	-0.928083	-1.27539	-0.500966	-0.532719	-0.975645	-1.44073
LANCL1	-0.222551	-0.6522	-0.610664	-0.540046	-1.17837	0.591442	-0.222551
LANCL2	4.07002	4.3683	-1.94857	3.32463	5.51975	3.9859	4.07002
LAP3	-6.52428	-6.5427	-5.18819	-2.61403	-7.43058	-6.56202	NA
LARP1	0.150861	0.648961	1.06275	-0.622661	-0.883092	-0.509498	0.150861
LARP1B	-1.20994	-0.277118	0.106313	-2.43167	0.91498	-1.51538	-1.20994
LARP4	2.71062	3.25242	2.24931	1.83376	2.86489	1.83702	2.71062
LARP7	6.07331	6.45497	7.27196	3.65695	4.54912	5.76958	6.07331
LARS	1.93828	2.39052	3.08442	-0.805638	1.13768	1.86993	1.93828
LARS2	6.63458	6.21544	6.96985	2.63685	4.31423	6.49494	NA
LBH	-3.72803	-4.06633	-3.73833	0.92652	-5.31305	-3.26232	-3.72803
LBR	1.52723	0.36568	0.0696767	2.38593	0.342033	1.05564	1.52723
LCLAT1	1.99527	2.11977	1.18374	0.187527	5.41715	1.67765	1.99527
LCMT1	3.07113	2.97692	0.95127	2.41455	1.66366	3.46969	3.07113
LCP2	-6.87503	-7.18871	-6.8179	-0.985425	-7.69816	-7.41132	-6.87503
LDB1	0.718318	0.873357	1.60439	0.187559	0.741719	0.717226	0.718318
LDHA	-1.17886	-1.50678	-0.383608	-1.23452	-0.346594	-1.3097	-1.17886
LDLRAP1	-4.62774	-4.29461	-1.29659	-4.10838	-4.49825	-4.33301	-4.62774
LEMD2	3.70471	2.7759	2.93052	2.88666	2.94568	4.19889	3.70471
LEMD3	2.98856	2.70803	1.00076	1.35783	2.8388	2.94031	2.98856
LENG8	2.44471	2.74851	2.43561	2.24073	0.817501	2.24744	2.44471
LEO1	2.41765	2.50797	2.68832	-0.144909	3.07602	2.01365	2.41765
LETM1	4.58655	4.52245	7.22494	1.64212	4.22233	4.27966	NA
LETMD1	1.58877	1.66626	1.3908	0.190292	2.59718	1.6305	NA
LFNG	-1.05996	-0.956016	-1.33633	-2.31111	0.36789	-0.835438	-1.05996
LGALS3	-0.88768	-0.707559	-0.323295	0.166559	-0.256397	-0.579028	-0.88768
LGALS3BP	1.25947	1.41483	0.71314	0.189385	2.49163	1.51099	1.25947
LGALS8	-0.519131	-0.465936	-2.46715	-1.42715	1.99673	-0.548721	-0.519131
LGALSL	1.27329	1.37702	1.04634	-0.104039	1.06039	1.86572	1.27329
LGMN	-2.19904	-1.51099	-1.8055	0.570056	0.434602	-2.15555	-2.19904
LHPP	-4.40249	-4.69444	-3.52625	-2.6703	-3.45574	-3.74243	-4.40249
LIG1	5.40303	6.22118	6.47074	4.53646	3.70462	4.8482	5.40303
LIG3	5.64925	7.04702	6.24735	4.05299	6.76717	5.4064	5.64925
LIMA1	-3.36633	-3.11558	-3.46509	-2.5129	-2.52024	-3.19939	-3.36633
LIMCH1	-2.31565	-2.49672	-1.1055	-2.12544	0.188948	-1.6757	-2.31565
LIMD1	-1.5149	-1.42151	-1.57454	-1.74217	-1.89298	-1.05846	-1.5149
LIMK1	-2.88551	-3.15441	-4.24749	0.64412	-2.32701	-3.54306	-2.88551
LIMS1	-2.12003	-1.90468	-2.1444	0.564956	-1.22415	-1.56174	-2.12003
LIN7C	2.87359	2.47659	2.87236	-0.654908	3.73304	3.58896	2.87359
LIPA	-1.83113	-2.01305	-1.36418	-0.578159	-1.72251	-1.76322	-1.83113
LLGL2	2.64602	2.73884	1.21887	-1.24734	2.42964	2.79498	2.64602
LMAN1	-1.61064	-1.61195	1.03563	-1.20605	-0.429232	-1.83675	-1.61064
LMAN2L	3.24618	3.36079	2.35815	1.35173	4.35513	3.25767	3.24618
LMBRD2	1.86914	1.66036	-2.07483	-0.407229	3.57229	1.93296	1.86914
LMCD1	-2.08838	-2.81537	-2.22879	0.778999	-2.91122	-1.56824	-2.08838
LMF2	-0.973381	-1.35499	0.523349	-0.837469	-1.23484	-1.05134	-0.973381
LMNA	-2.45683	-2.49238	-3.35706	0.500156	-2.00277	-1.81094	-2.45683
LMOD1	-5.08659	-4.83227	-4.50902	-0.516203	-5.08915	-4.60502	-5.08659
LMTK2	3.13357	3.1528	1.44637	0.497523	3.78436	3.68088	3.13357
LNPEP	-0.439228	-0.555528	1.43933	-0.680376	-1.33789	-0.376702	-0.439228
LONP1	4.76831	5.7537	5.57047	2.49355	4.69223	4.54053	NA
LOX	-1.51738	-1.88804	-1.44893	0.729004	-0.816044	-1.51281	-1.51738
LOXL1	-2.05111	-2.08391	-2.18918	1.53304	-1.44522	-1.63279	-2.05111
LPCAT1	1.04528	1.01773	-1.83101	-0.0175326	2.12345	0.830455	1.04528
LPCAT3	2.99343	3.10548	1.31446	1.27155	2.89498	3.08345	2.99343
LPCAT4	-3.02267	-2.57227	-1.36318	-3.03888	-2.14617	-3.14761	-3.02267
LPGAT1	0.930499	0.520482	-0.746036	0.922521	0.0154646	0.760515	0.930499
LPIN3	4.96602	5.7566	2.98981	3.79136	3.88789	4.819	4.96602
LPP	-4.03719	-3.52465	-4.61385	0.372717	-3.28233	-3.45932	-4.03719
LRBA	1.05089	1.73946	1.75204	-0.479	2.34477	1.4083	1.05089
LRCH3	-3.88366	-4.50166	-5.14733	-0.920703	-4.05564	-3.87268	-3.88366
LRIF1	1.07353	1.10701	1.91577	2.39769	0.410955	0.413671	1.07353
LRP1	-4.11593	-3.74378	-4.42951	0.254626	-3.44337	-3.68589	-4.11593
LRPAP1	-0.3175	-0.370641	1.11807	0.525462	-0.193106	-0.27442	-0.3175
LRPPRC	8.4837	8.86023	8.12397	4.73205	6.63664	8.10961	NA
LRRC1	1.8439	2.42865	0.849226	-2.33728	2.03022	1.87765	1.8439
LRRC14	3.0031	1.96073	-1.74089	2.01822	0.0975061	3.44546	3.0031
LRRC20	1.07155	1.22762	1.91245	0.36307	1.08345	1.35444	1.07155
LRRC25	-5.98324	-5.28199	-6.22241	-1.67163	-4.9462	-6.50385	-5.98324
LRRC40	-1.39953	-1.26621	1.0533	-0.505466	-0.0786705	-1.71961	-1.39953
LRRC41	2.32444	1.52118	3.02056	0.869122	1.86637	2.7808	2.32444
LRRC57	-1.02461	-0.634941	2.63746	-2.47746	1.13821	-0.68752	-1.02461
LRRC59	2.11854	1.81606	1.2471	0.846939	1.2073	1.71768	2.11854
LRRC8A	1.20488	0.699738	1.91527	0.439552	-0.207412	1.02398	1.20488
LRSAM1	-3.34714	-4.09011	-3.01217	-2.1832	-4.36487	-3.30601	-3.34714
LSG1	6.33556	6.60197	2.9793	4.51199	5.67379	5.89427	6.33556
LSM1	-0.0831573	0.103472	-1.66683	0.552759	-2.04482	-0.11853	-0.0831573
LSM12	0.916469	1.52558	0.898282	0.748803	0.684367	0.643004	0.916469
LSM14A	3.61341	4.21736	2.54724	2.85805	4.43007	3.33291	3.61341
LSM14B	8.16569	7.41718	3.97371	4.31931	5.67729	7.84695	8.16569
LSM3	2.4206	2.34505	2.39702	2.49674	0.263415	2.47682	2.4206
LSM4	2.74102	2.65932	2.46854	1.0854	0.961321	2.81515	2.74102
LSM6	1.71747	2.40315	2.89669	1.59991	1.23131	1.78787	1.71747
LSM7	0.499706	0.715397	1.28357	0.0241864	0.170654	0.576313	0.499706
LSP1	-6.7577	-7.51269	-6.48751	-1.00138	-7.77328	-6.94607	-6.7577
LSR	2.37839	2.53561	1.11504	-0.944021	3.70805	2.18726	2.37839
LSS	1.37435	0.944595	3.24409	0.898616	0.0858156	1.36021	1.37435
LTA4H	-3.38098	-3.46305	-3.72983	-2.48885	-1.41809	-2.95621	-3.38098
LTBP2	-2.55954	-2.86495	-2.58085	0.301615	-2.79604	-1.8699	-2.55954
LTN1	0.487581	0.692765	2.74434	0.870744	-0.915273	0.1438	0.487581
LTV1	3.60792	3.79929	3.97647	2.59294	2.04209	2.98609	3.60792
LUC7L	1.3585	1.04654	0.708428	-0.338259	1.04288	1.27097	1.3585
LUC7L3	3.6215	4.28687	3.20591	3.04707	4.99387	3.48767	3.6215
LUM	-4.78829	-4.96541	-4.70333	0.27893	-4.07453	-4.23883	-4.78829
LURAP1L	-2.51213	-2.45831	-2.07266	-3.53911	-1.29019	-1.7146	-2.51213
[truncated: 2,331 more rows]

## Sheet: 4B_tValue_CPTAC_RNA
table 4B: t-value of aneuploidy coefficient of the linear model: RNA ~ Aneuploidy score + other variable
model:	RNA ~ AS	RNA ~ AS + cancer types	RNA ~ AS + copy number variation	RNA ~ AS + purity (estimated)	RNA ~ AS + purity (nuclei)	RNA ~ AS + Cell cycle	RNA ~ AS, remove mitochondrial genes
gene	AS_Tvalue_AS	AS_Tvalue_AS+Cancer	AS_Tvalue_AS+CNV	AS_Tvalue_AS+estiPurity	AS_Tvalue_AS+nucleiPurity	AS_Tvalue_AS+CellCycle	AS_Tvalue_AS+removeMito
AAAS	1.33378	2.33665	0.710139	-0.685036	4.48233	1.04112	1.33378
AACS	0.802888	1.3461	0.592077	-2.90556	3.29161	0.48828	0.802888
AAGAB	-2.48149	-0.969275	0.532355	-4.81715	1.91816	-3.16942	-2.48149
AAMP	-0.235909	0.227483	-0.377306	-1.13696	0.509574	-0.452339	-0.235909
AAR2	6.3916	5.2653	-0.489742	6.32022	4.5666	6.36055	6.3916
AASDHPPT	-1.17643	-0.932755	0.00464694	-2.48382	-0.699277	-1.26682	-1.17643
AASS	-3.92207	-3.50553	-4.46919	-1.74587	-2.36274	-3.3386	NA
AATF	1.8435	3.76544	1.85373	3.14729	3.04998	1.25151	1.8435
ABAT	1.82496	1.86116	0.660021	1.55076	1.08436	2.62464	NA
ABCB1	-1.09744	-2.68157	-1.38471	2.45698	-4.75235	-0.553886	-1.09744
ABCB10	3.29501	2.54705	-0.736116	1.84576	2.35014	3.10405	NA
ABCB6	2.51331	3.29701	2.38671	1.60275	2.3508	2.1469	NA
ABCB8	0.426609	0.514605	-1.44201	-1.46017	-0.125775	0.263483	NA
ABCC3	-1.5187	-1.73027	-1.99054	-0.801604	-1.91386	-1.19781	-1.5187
ABCC4	2.87143	2.41552	2.3805	4.34552	2.19242	3.08727	2.87143
ABCD3	-2.88911	-2.34095	-1.26187	-4.31619	-1.89955	-2.87126	NA
ABCE1	-2.47477	-1.03425	1.14493	-0.775205	-1.13324	-3.47786	-2.47477
ABCF3	6.07809	5.65284	1.60202	4.29702	6.62021	5.8851	6.07809
ABHD10	-1.20413	-3.03422	-3.38165	-5.08631	0.71679	-1.29444	NA
ABHD11	5.21764	5.57908	3.02959	3.91949	5.83357	4.98974	NA
ABHD12	5.55726	4.38288	0.485122	1.99597	5.0461	5.29222	5.55726
ABHD17B	-3.00934	-3.29163	-0.742281	-4.0611	-2.39959	-2.96268	-3.00934
ABHD6	-2.58314	-2.94832	-2.53742	-4.00852	-2.78016	-2.08982	-2.58314
ABI1	-2.27878	-1.80536	-1.70617	-1.9778	-3.38797	-2.42165	-2.27878
ABI2	2.62769	3.56168	3.35228	2.96527	2.70312	2.88736	2.62769
ABLIM2	1.42438	0.92025	2.70391	1.20308	-1.90957	2.00657	1.42438
ABR	-2.12738	-1.16747	0.412938	-0.460337	-3.19743	-1.93695	-2.12738
ABT1	1.46731	1.06782	-0.279635	1.22268	-0.373656	1.0207	1.46731
ACAA1	-2.23018	-3.87142	-3.00545	-5.32792	-3.31642	-1.89477	NA
ACAA2	-3.6995	-2.56862	-1.56257	0.533514	-2.43186	-3.65804	NA
ACAD8	-1.82626	-0.861287	-0.137484	-3.15524	-0.613773	-1.39123	NA
ACAD9	4.05216	3.79522	1.93549	1.56355	3.06166	3.84249	NA
ACADM	-4.95961	-4.76332	-2.96039	-5.66001	-4.15486	-4.9013	NA
ACADS	-3.87035	-3.60998	-4.0002	-5.71107	0.0547529	-3.70516	NA
ACADSB	-2.49294	-2.30843	-1.57294	-4.23928	1.7622	-2.01096	NA
ACADVL	-4.9407	-2.95069	-2.10125	-6.25957	-2.30799	-4.9311	NA
ACAP1	-5.68547	-7.65409	-5.93766	-0.838385	-9.76414	-5.60014	-5.68547
ACAP2	0.580676	1.28931	-4.59158	2.66426	3.88451	0.408144	0.580676
ACAT2	0.664166	1.06352	1.37836	-0.408303	0.828072	-0.145333	0.664166
ACBD3	0.462352	-0.368275	-3.27158	-1.37145	1.81068	0.357699	0.462352
ACBD5	-0.702111	-0.569708	-0.253549	-2.1696	-3.33975	-0.81312	-0.702111
ACE	-2.85275	-2.21319	-2.76751	-0.732399	-3.91344	-2.75839	-2.85275
ACIN1	-1.37152	-0.0950178	-1.04155	-1.64034	2.1835	-1.4691	-1.37152
ACLY	-2.16228	-0.430157	-2.97316	-0.534759	0.523566	-2.6697	NA
ACO1	-2.56378	-2.93441	-2.20413	-1.72186	-2.41368	-2.40063	NA
ACO2	-3.31729	-0.458367	0.756915	-3.26764	0.938128	-3.54498	NA
ACOT11	1.60954	1.91084	2.58632	1.49797	-0.729731	1.65008	1.60954
ACOT13	-0.746116	-0.170788	-0.979423	-1.2742	-1.13471	-0.914162	NA
ACOT8	5.94584	4.83547	0.0892536	2.51771	4.70998	5.78853	5.94584
ACOX1	-0.790893	-0.330842	-3.0027	-0.287065	-1.73395	-0.408604	NA
ACOX3	-4.02283	-3.69889	-0.829322	-4.58574	-3.71334	-3.65386	NA
ACP1	1.87317	1.87312	0.260761	-0.276914	1.82357	1.43035	1.87317
ACP2	-4.37558	-4.04978	-4.31525	-1.69531	-3.20096	-4.62298	-4.37558
ACP5	-2.88289	-3.25545	-2.94119	0.466304	-3.39831	-3.02028	-2.88289
ACPP	-1.26529	-1.60181	-2.51705	-2.37354	0.967951	-1.30532	-1.26529
ACSF2	0.00288869	0.732018	-0.472759	0.0134201	-0.641415	0.229236	NA
ACSF3	-1.28412	-0.0467641	0.0100389	-0.497856	-0.120221	-1.20699	NA
ACSL1	-3.13456	-2.76032	-0.955455	-0.331334	-1.92439	-2.91915	NA
ACSL3	-1.81772	-1.47533	-1.62127	-3.40353	-0.767541	-2.15431	-1.81772
ACSL5	-4.99456	-4.62977	-3.70755	-2.78893	-6.18704	-4.57952	-4.99456
ACSS1	-0.107004	-0.147305	-1.89195	-0.468555	0.902627	0.0994716	NA
ACSS2	3.83578	3.55752	-0.253016	1.94163	2.46375	4.22304	3.83578
ACTB	-1.20838	-0.642081	-2.53024	2.88923	-1.63683	-1.53903	-1.20838
ACTG1	0.324546	0.382205	-0.959728	0.689838	-0.353142	-0.106346	0.324546
ACTN1	-1.26493	-0.244957	-0.649564	1.29005	-1.85643	-1.35756	-1.26493
ACTR1A	-6.23374	-5.21024	-2.92332	-3.79542	-4.8654	-6.23405	-6.23374
ACTR1B	-1.23208	-1.27429	-3.09172	-1.63764	1.33744	-1.14504	-1.23208
ACTR5	6.65328	5.24572	-0.373897	4.19355	2.15654	6.45245	6.65328
ACTR6	0.197132	0.232758	-0.263032	-1.88522	1.57957	-0.370356	0.197132
ACTR8	0.253119	-0.145148	0.150712	-3.04231	-1.11862	0.530847	0.253119
ACYP1	0.0336073	1.3212	1.22816	-1.34559	4.17663	-0.517064	0.0336073
ACYP2	-1.56813	-1.365	-2.41533	-2.76756	-0.564219	-1.30848	NA
ADA	-1.85894	-1.84606	-3.16669	1.50034	-3.12851	-2.46883	-1.85894
ADAM10	-6.48724	-5.30095	-2.90292	-4.06085	-3.18851	-6.74814	-6.48724
ADAM15	-0.903969	-0.945776	-2.97787	-2.31367	-0.772243	-1.08058	-0.903969
ADAM17	0.222211	0.630318	-0.851442	2.22951	1.69514	-0.0199578	0.222211
ADAM9	-2.52161	-2.01729	-4.09624	-1.81597	-1.57878	-2.68477	-2.52161
ADAR	0.413098	0.743986	-3.15671	1.29892	0.703266	0.151579	0.413098
ADCY6	0.415336	1.22147	-0.00111621	-0.141436	1.43939	0.89744	0.415336
ADD3	-2.0266	-1.11714	-0.825815	0.0452378	-0.797938	-1.7554	-2.0266
ADH5	-6.19107	-6.22122	-1.92326	-3.94753	-4.43404	-6.22096	-6.19107
ADK	-0.773059	-1.39047	1.53473	-2.25006	-1.73097	-1.01347	-0.773059
ADNP	5.77597	5.58948	0.984335	6.42379	9.18367	5.76325	5.77597
ADO	-1.84225	-1.62068	2.34082	-2.14411	0.241916	-2.1558	-1.84225
ADPGK	-5.52925	-4.62627	-2.09004	-2.78827	-4.20098	-6.03727	-5.52925
ADPRH	-2.40101	-2.63227	-3.26763	4.04627	-4.15962	-2.158	-2.40101
ADPRHL2	-2.45747	-1.49269	-1.32033	-3.43079	-1.82488	-2.96451	-2.45747
ADRM1	3.84147	3.9344	-0.505051	4.64206	4.12488	3.34395	3.84147
ADSS	2.4041	1.85792	-1.85179	0.878128	3.14755	2.27035	2.4041
AFAP1	-1.03251	-0.663316	0.848501	1.99834	-1.399	-0.907421	-1.03251
AFAP1L2	-3.59651	-4.2589	-1.95215	-1.54406	-4.52994	-3.36325	-3.59651
AFF4	-3.95967	-1.88237	-1.65717	-2.93945	-1.89402	-3.68391	-3.95967
AFG3L2	-0.612913	1.27733	3.28805	-1.76855	2.82427	-1.20183	NA
AFMID	-1.34794	-0.775072	-2.62597	-2.26522	0.579956	-1.12786	-1.34794
AGAP1	3.57381	4.72582	4.22659	2.37821	4.82282	3.65168	3.57381
AGAP3	0.786774	0.561833	-1.70203	-0.00741418	-1.07346	0.831644	0.786774
AGFG2	0.647386	0.667015	-2.01416	-0.464973	0.525908	1.10429	0.647386
AGK	2.05276	2.41663	0.0220338	2.02823	2.3736	1.95122	NA
AGL	-0.674742	-0.269465	0.955049	-0.486222	0.488673	-0.702408	-0.674742
AGO1	0.310032	1.44748	2.81777	1.95887	3.08834	0.24869	0.310032
AGO2	9.1672	8.39358	3.56148	7.57646	8.29555	8.94745	9.1672
AGO3	0.203817	0.353603	2.20652	1.21283	2.42176	0.112546	0.203817
AGPAT2	-1.25749	-0.523429	-0.282811	-1.4331	0.766425	-1.37348	-1.25749
AGPAT3	-3.35792	-2.59576	-0.901929	-2.48506	-2.49682	-3.23386	-3.35792
AGPAT5	-3.18573	-1.32952	1.48629	-3.45318	0.969249	-3.69037	NA
AGPS	-2.28135	-2.82894	-2.98108	-2.44084	-2.20206	-2.37323	-2.28135
AGR2	-4.77044	-4.4952	-4.78111	-5.05669	-1.07611	-4.87243	NA
AGR3	-5.31126	-4.40711	-5.06006	-5.45864	-2.26728	-5.09628	-5.31126
AGRN	0.598669	0.335527	1.40667	0.596155	1.4876	0.582987	0.598669
AGT	0.211752	-0.0181525	-0.603738	0.893696	-1.15747	0.41237	0.211752
AHCY	8.29484	7.50345	2.63406	5.46015	4.83236	7.92055	8.29484
AHCYL1	-2.8928	-2.88442	-1.17152	-4.65918	-1.65379	-2.68256	NA
AHCYL2	-2.45895	-1.85817	-3.70543	-5.24245	0.949727	-2.2017	-2.45895
AHNAK	-2.89262	-2.73775	-2.88517	-1.85983	-1.79898	-2.39687	-2.89262
AHNAK2	0.699674	-0.331961	0.758217	1.3748	-0.258445	0.75327	0.699674
AHR	-3.5541	-3.31561	-5.39545	-0.647557	-1.95939	-3.43066	-3.5541
AHSA1	1.3294	2.79789	3.54451	0.13546	4.17838	0.60143	1.3294
AIDA	-0.732661	-1.60264	-4.60503	0.246147	-1.47974	-1.00763	-0.732661
AIMP2	0.473293	3.3033	-1.94124	3.06979	7.32926	0.0169788	0.473293
AIP	0.0544045	0.401793	-1.47489	1.17557	1.04496	0.0395579	0.0544045
AK2	-0.290902	0.291539	3.1306	-1.25394	1.31308	-0.695605	NA
AK3	-1.03402	-1.28664	0.655999	-1.72793	-2.35098	-0.689708	NA
AKAP1	7.79097	8.63079	7.07544	5.06956	6.47833	7.91289	NA
AKAP12	-3.12021	-3.13154	-2.69946	1.4106	-2.16065	-2.77402	-3.12021
AKAP13	-5.29884	-4.66126	-4.08605	-1.30257	-4.41693	-4.81431	-5.29884
AKAP9	0.191673	0.070274	-3.25473	0.12507	2.51601	0.453402	0.191673
AKR1A1	-5.86962	-4.891	-5.46444	-6.33539	-6.23402	-6.04574	-5.86962
AKR1B1	-0.754781	-0.632632	-1.34443	2.48883	-0.142485	-0.88892	-0.754781
AKR1B10	-3.30198	-2.30514	-3.98622	-3.11701	-2.50547	-3.44665	NA
AKT1	-0.990022	-0.30327	-0.795527	-2.56723	3.19239	-1.39295	-0.990022
AKT2	-1.25044	0.261275	-1.47549	0.945025	3.77605	-1.30177	-1.25044
AKT3	-2.54778	-2.27003	-3.11793	5.27412	-0.812505	-2.16146	-2.54778
AKTIP	0.0335016	1.59825	1.33926	0.731048	1.04571	0.217275	0.0335016
ALAD	-2.85778	-3.05545	-1.50856	-2.40348	-2.07741	-2.31069	-2.85778
ALAS1	0.290128	-0.0947434	0.564935	-2.86956	0.234442	0.253547	NA
ALCAM	0.910208	-0.161967	0.362233	-0.626341	2.20325	1.03211	0.910208
ALDH16A1	-1.38454	-1.33682	-1.19856	-1.01926	-1.85786	-1.67634	-1.38454
ALDH18A1	-1.68602	-0.0602906	1.49384	-2.47277	0.588054	-1.96063	NA
ALDH1A1	-2.323	-2.88698	-1.88462	0.157072	0.294609	-2.00928	-2.323
ALDH1A3	-4.78353	-5.24606	-4.40122	-1.17756	-4.70866	-4.41978	-4.78353
ALDH1B1	0.435699	1.11313	0.627808	4.45888	-0.894265	0.308768	NA
ALDH1L2	-0.781356	0.349264	-0.916609	3.83476	0.772918	-0.784643	NA
ALDH3A2	-3.36878	-2.09805	-0.630418	-3.15797	-0.432798	-3.13618	NA
ALDH5A1	4.05781	4.34622	3.4136	2.87417	3.27131	4.25036	NA
ALDH6A1	-2.36418	-2.10089	-1.16597	-4.88044	2.23761	-1.86365	NA
ALDH9A1	-0.71686	-1.47749	-4.88306	-0.979327	-2.87785	-0.579065	NA
ALDOB	-3.05492	-3.391	-2.78818	-1.53854	-2.73475	-2.80833	-3.05492
ALDOC	1.85742	2.18633	1.56374	1.87651	3.32908	1.47719	1.85742
ALG12	-2.57774	-0.683842	0.721822	-2.51973	1.2002	-2.68846	-2.57774
ALG2	-3.98029	-4.23711	-1.65203	-5.85408	-2.59485	-3.91373	-3.98029
ALG5	-1.77379	-1.00385	-3.35509	-1.49903	-3.64449	-1.72282	-1.77379
ALG6	-0.046785	1.09456	1.99391	-0.460712	0.875266	-0.723293	-0.046785
ALG9	-3.26529	-2.80741	-1.4709	-4.0783	-0.0818095	-3.16481	-3.26529
ALKBH5	-2.34102	-0.160236	0.802776	-2.98289	0.282866	-2.63101	-2.34102
ALKBH7	-1.07775	-0.30295	-0.650102	-2.24791	1.03485	-0.99246	NA
ALOX5	-7.14021	-7.77116	-7.14935	-1.52258	-6.85768	-6.94429	-7.14021
AMFR	-1.88237	0.0994254	-1.00964	-0.461232	1.31199	-1.69903	-1.88237
AMPD2	-0.136514	0.648289	1.39474	2.68853	-1.1389	-0.176579	-0.136514
AMPD3	-3.04553	-3.20931	-2.65684	-1.67474	-3.08298	-2.83728	-3.04553
ANAPC16	-2.66306	-3.13042	-0.872789	-2.70539	-2.12387	-2.35216	-2.66306
ANAPC2	-2.19576	-2.21989	-1.15051	-3.08944	-0.797144	-2.12229	-2.19576
ANAPC4	-5.3212	-5.62006	-2.24708	-4.11084	-5.17717	-5.12748	-5.3212
ANGEL2	1.76857	0.695152	-1.88619	0.868893	0.950812	2.10464	NA
ANGPTL2	-4.33053	-4.33814	-4.13091	0.757559	-4.81072	-4.01081	-4.33053
ANK2	-4.67255	-5.64156	-4.66632	0.436076	-6.53734	-4.19611	-4.67255
ANK3	-1.92996	-2.05923	-0.769759	-1.7961	-1.18076	-1.46664	-1.92996
ANKFY1	-5.82681	-3.12225	-1.36173	-2.99561	-1.56368	-5.80791	-5.82681
ANKLE2	0.490749	1.82449	0.657256	0.540222	1.2348	0.181383	0.490749
ANKMY2	-0.209724	0.0177103	-4.84236	-0.926521	2.7536	-0.0500659	-0.209724
ANKRD13A	-1.49444	-1.46832	-2.00895	-0.503715	-0.614251	-1.42567	-1.49444
ANKRD17	-0.668619	0.00709427	1.0894	0.375661	0.810656	-0.655195	-0.668619
ANKRD22	-3.85361	-4.24625	-3.73196	-2.28269	-5.5774	-4.10948	-3.85361
ANKRD27	5.96429	7.08136	5.39381	7.22859	5.10052	5.72171	5.96429
ANKRD28	0.399423	-0.063576	0.109431	-0.501239	-0.655729	0.560561	0.399423
ANKRD44	-8.47558	-9.29364	-8.62614	-1.55904	-9.27929	-8.13255	-8.47558
ANKS1A	3.24836	3.58554	2.25445	2.94367	3.69317	3.43872	3.24836
ANKZF1	0.797856	0.0682672	0.557718	-3.16729	-0.757526	0.86683	0.797856
ANLN	3.29887	4.07456	1.62053	2.89697	4.24551	2.29767	3.29887
ANO1	-1.17581	-2.4747	-3.73003	-0.363788	-0.759242	-1.19969	-1.17581
ANO10	2.22285	1.8607	2.35564	0.157656	0.654786	2.37491	2.22285
ANO6	-2.95739	-3.23141	-3.65291	-0.74787	-4.23207	-2.80986	-2.95739
ANP32A	-2.52327	-0.8105	-0.550638	-4.82283	1.27778	-2.96037	-2.52327
ANP32B	0.766045	2.17733	2.61157	1.14513	2.73917	0.0901566	0.766045
ANP32E	-1.01534	-1.10069	-3.58355	-1.1806	1.18321	-1.76126	-1.01534
ANPEP	-1.70618	-1.3493	-1.70724	0.247998	-2.16066	-1.71024	-1.70618
ANTXR1	-1.37891	-1.94793	-1.63118	3.68666	-2.16608	-0.968023	-1.37891
ANTXR2	-8.69317	-9.74752	-7.66608	-2.65496	-9.90703	-8.41131	-8.69317
ANXA1	-5.04899	-6.67033	-4.51269	-3.79782	-5.24673	-5.07347	-5.04899
ANXA11	-2.91531	-2.08921	-0.41813	-1.57827	-3.08023	-2.67615	-2.91531
ANXA2	-5.8934	-4.6993	-3.95995	-4.01301	-3.31711	-6.25808	-5.8934
ANXA4	-2.35766	-1.85175	-3.74316	-1.58559	-1.86246	-2.30111	-2.35766
ANXA5	-5.93125	-6.59449	-3.57663	-1.76129	-6.14522	-5.97496	-5.93125
ANXA6	-4.25215	-4.01769	-3.9841	0.921133	-7.43414	-4.03652	-4.25215
ANXA7	-4.34085	-2.71294	-2.17793	-5.07099	-1.45778	-4.47662	-4.34085
AOX1	-3.45678	-3.51017	-3.73584	0.642305	-4.93393	-2.962	-3.45678
AP1G1	-3.71537	-0.348593	-2.81924	-1.35433	0.153096	-3.86059	-3.71537
AP1G2	-0.185074	0.582853	0.106527	-1.91913	1.45302	-0.129526	-0.185074
AP1S1	0.973202	1.23198	-2.0699	-0.343558	2.01729	0.563513	0.973202
AP2A1	1.30196	1.01668	1.55994	1.19686	-0.381628	1.18907	1.30196
AP2A2	-3.16857	-3.12232	-1.52135	-2.34564	-2.45889	-2.89221	-3.16857
AP2S1	-3.62986	-3.38178	-2.91652	-3.32232	-2.94656	-4.63536	-3.62986
AP3D1	0.391157	2.70435	2.92745	0.957806	3.06399	0.208975	0.391157
AP3M2	2.75706	2.40274	-0.711422	2.22652	2.28357	2.6065	2.75706
AP3S1	-3.89841	-2.77738	-2.13335	-2.55611	-3.5979	-4.16021	-3.89841
AP5B1	0.933047	2.06885	0.598086	1.32269	4.46315	0.706911	0.933047
AP5Z1	0.688348	2.98931	-2.53007	2.56966	2.21794	0.528731	0.688348
APAF1	-0.887478	-0.55709	-1.43414	-0.00722553	-0.546191	-1.15012	-0.887478
APBB1IP	-7.1781	-8.05637	-7.26279	-0.652942	-8.63829	-7.01291	-7.1781
APBB2	-2.45201	-2.56416	-0.599397	-1.64758	-2.09214	-1.98933	-2.45201
APEH	0.107917	0.0920014	0.380782	-4.35207	-0.0930808	-0.0610088	0.107917
APEX1	0.212823	0.643995	0.779195	-2.18371	2.21787	-0.381605	0.212823
APIP	2.01106	1.40529	0.498567	0.0939771	-0.390862	1.95767	2.01106
APLP2	0.00834547	1.13786	1.42601	-0.921985	2.7317	0.403793	0.00834547
APMAP	2.77851	3.61876	-0.24733	3.69835	5.87653	2.57287	2.77851
APOBR	-1.39866	-2.5667	-2.7772	0.225609	-6.10111	-1.10573	-1.39866
APOD	-1.50414	-2.00151	-1.40344	2.54399	-3.97886	-0.644486	-1.50414
APOE	-3.01767	-2.20801	-2.97768	2.11793	-1.98508	-3.23695	-3.01767
APOL2	-5.79596	-5.13631	-4.30613	-4.19776	-4.26923	-6.24806	-5.79596
APP	-2.48834	-1.6802	-0.515108	-1.42215	-0.0401089	-2.13873	-2.48834
APPL1	-1.40755	-1.47961	-1.02759	-2.71178	-1.17748	-1.27569	-1.40755
APPL2	0.633093	1.55083	-0.394247	0.672566	2.0072	0.893718	0.633093
APRT	-1.88027	0.238157	-0.308223	-1.70688	1.18196	-2.27712	-1.88027
APTX	-1.24028	-1.18985	-0.484406	-3.17243	-0.155842	-1.71701	-1.24028
ARAP1	0.560205	-0.176679	-1.31858	0.573147	1.2537	0.665212	0.560205
ARCN1	-2.81823	-1.53213	-0.929493	-3.29103	0.0984721	-2.84311	-2.81823
ARF4	-2.63222	-4.00077	-2.21786	-4.28692	-2.06917	-2.62437	-2.63222
ARF5	3.0235	3.20574	0.740148	1.28751	3.27983	2.70621	NA
ARF6	-2.05313	-1.62917	-1.91636	-2.92394	0.429108	-2.81947	-2.05313
ARFGEF1	6.48229	5.66593	0.519766	3.86937	5.58282	6.46977	6.48229
ARFGEF2	8.0023	6.27825	0.0922101	4.69164	4.15416	8.20555	8.0023
ARFIP1	-5.5029	-5.58522	-1.14558	-6.2539	-4.26723	-5.30516	-5.5029
ARFIP2	-6.43661	-5.36674	-5.1623	-7.84851	-2.25557	-6.52121	-6.43661
ARFRP1	4.93676	3.80734	-2.2332	3.75386	2.69295	5.12306	4.93676
ARGLU1	-1.3633	-1.82288	-4.39619	0.19154	-5.0069	-1.02016	-1.3633
ARHGAP1	-2.21735	-1.30605	-1.87514	-0.75312	-0.915229	-1.95716	-2.21735
ARHGAP10	-5.83431	-5.85161	-4.34964	-1.48023	-7.88055	-5.81892	-5.83431
ARHGAP12	-0.497926	0.322353	-0.309313	-0.919747	1.22666	-0.146108	-0.497926
ARHGAP15	-9.52881	-10.3535	-9.49241	-1.85051	-11.6676	-9.41051	-9.52881
ARHGAP17	0.654763	0.393515	-1.04126	2.88188	-2.06435	0.960829	0.654763
ARHGAP18	-6.21594	-7.03873	-5.95439	-3.35939	-7.59707	-5.91659	-6.21594
ARHGAP21	-0.663966	0.589542	-0.216208	0.903708	-0.398495	-0.547981	-0.663966
ARHGAP26	-5.01057	-5.00376	-4.58275	-2.16194	-5.00227	-4.82317	-5.01057
ARHGAP30	-7.87213	-8.62973	-7.78202	-0.686463	-9.69124	-7.89223	-7.87213
ARHGAP32	-3.04301	-2.74724	-2.39187	-5.13622	-0.505614	-2.62814	-3.04301
ARHGAP35	2.06579	3.9749	3.23782	0.955471	7.25799	2.21795	2.06579
ARHGAP5	1.09173	1.62635	0.930607	-0.748442	5.51125	1.05233	1.09173
ARHGAP9	-7.65919	-8.98559	-7.77991	-1.16726	-10.9855	-7.58401	-7.65919
ARHGDIA	0.6067	0.592639	-0.917688	1.36362	-0.277406	0.461683	0.6067
ARHGDIB	-6.34864	-6.70415	-6.14223	-1.42819	-9.70536	-6.15715	-6.34864
ARHGEF1	-3.26002	-3.25656	-3.5948	-0.304358	-5.85388	-3.14917	-3.26002
ARHGEF10	-1.94615	-1.86929	0.341957	-0.695683	-2.21122	-1.53807	-1.94615
ARHGEF16	-0.260324	0.139218	1.86866	-3.0897	3.54537	-0.481723	-0.260324
ARHGEF17	0.880902	1.73371	-0.294206	3.17447	0.961264	1.42416	0.880902
ARHGEF18	-1.48837	-0.26631	-1.09974	-0.68267	-1.35961	-1.31649	-1.48837
ARHGEF2	0.411181	0.533663	-2.33956	0.409958	1.03972	0.503555	0.411181
ARHGEF37	-0.508526	-0.812965	-0.142044	-2.04305	-1.29545	0.0614669	-0.508526
ARHGEF40	-0.520096	-0.230075	-0.338816	2.76173	-0.237301	0.0747041	-0.520096
ARHGEF5	3.48067	3.79182	1.86265	1.75902	3.76385	3.53306	3.48067
ARHGEF7	-0.651643	-0.150121	-3.79451	2.23084	-2.3136	-0.252434	-0.651643
ARID2	1.57189	2.45639	-0.105201	0.286863	3.02106	1.52774	1.57189
ARID3A	2.56254	4.52127	4.04798	4.55831	2.9042	2.3544	2.56254
ARIH2	-0.0790757	0.283685	0.284769	-1.60907	-1.05182	-0.0651044	-0.0790757
ARL1	-1.31326	-0.893614	-1.82027	-3.21017	2.45456	-1.26442	-1.31326
ARL14EP	-1.52046	-2.49148	-2.34674	-2.17859	-2.75362	-1.28288	-1.52046
ARL15	-3.76441	-4.12734	-3.27813	-2.19182	-0.744973	-3.27792	-3.76441
ARL2BP	-2.65317	-0.196338	-1.27338	1.01405	0.366027	-2.5401	-2.65317
ARL3	-1.60389	-1.33009	0.197846	-2.61415	-1.19668	-1.46103	-1.60389
ARL5B	0.139236	0.299037	0.518186	-0.576366	-0.501839	-0.289129	0.139236
ARL6	0.642548	0.143682	-1.26259	-1.59254	2.33185	0.973037	0.642548
ARL6IP5	-6.60171	-9.13193	-6.74829	-7.20066	-9.76368	-6.21259	-6.60171
ARL6IP6	3.07435	1.09605	2.76908	1.35196	2.87683	2.91891	3.07435
ARL8A	3.09307	3.04603	0.60343	2.62288	2.77604	3.27907	3.09307
ARL8B	0.0329411	0.251693	-0.0964972	-1.15095	-1.50364	0.0652873	0.0329411
ARMC1	4.98164	3.82081	-0.860662	2.90062	3.6559	4.55409	4.98164
ARMC10	2.82215	2.28273	-2.06576	1.30908	4.08409	2.69787	NA
ARMC6	0.631665	2.56925	0.133292	1.81439	4.00939	0.187166	0.631665
ARPC2	-2.6449	-2.58639	-2.97812	-2.36914	-7.20993	-2.93665	-2.6449
ARPC3	-2.78509	-2.41598	-3.28112	-2.23802	-2.51166	-3.09351	-2.78509
ARPC5	-1.45802	-2.31487	-4.55393	0.795363	-3.54765	-1.85361	-1.45802
ARPC5L	-1.68079	-0.994747	-0.215628	-1.89438	-1.31788	-2.52664	-1.68079
ARPP19	-4.85107	-3.35151	-2.47028	-4.67139	-1.28285	-5.04349	-4.85107
ARRB1	-1.81196	-2.65159	-3.47385	1.22184	-5.04922	-1.56133	-1.81196
ARRB2	-4.48003	-4.0862	-2.37535	-0.340001	-6.06584	-4.60328	-4.48003
ARRDC1	-1.5391	-1.13072	-0.672829	-1.97186	-0.93093	-1.5833	-1.5391
ARSA	-2.91388	-2.42128	-1.71095	-2.80403	-0.591795	-2.67094	-2.91388
ARSB	-4.88178	-4.26289	-3.82229	0.132175	-4.06	-4.85141	-4.88178
ARVCF	0.346329	1.50502	2.6108	-0.243117	1.84603	0.426856	0.346329
ASAH1	-6.49252	-5.02048	-4.0195	-4.7972	-3.21832	-6.25942	-6.49252
ASAP1	3.24932	2.91542	0.664937	7.08439	0.798495	3.11657	3.24932
ASCC1	-3.03331	-2.16065	-0.335563	-2.82387	-0.240416	-3.35788	-3.03331
ASCC2	-1.84922	0.0268062	0.693617	-1.28228	1.64395	-1.90621	-1.84922
ASCC3	-4.08276	-4.30149	-3.37019	-2.20304	-4.46407	-4.3686	-4.08276
ASF1A	-1.39104	-1.40709	-0.175104	-1.9769	-0.0146939	-1.72265	-1.39104
ASH2L	0.923173	0.628472	-1.81046	-0.0224234	2.22091	0.810589	0.923173
ASNA1	-1.84683	-0.434096	-2.13293	-4.02252	-0.895511	-2.03166	-1.84683
ASPH	-3.27326	-3.38843	-4.52509	-4.25693	0.333247	-3.43315	-3.27326
ASPSCR1	5.12456	5.45294	3.88825	3.2542	3.91737	4.97988	5.12456
ASRGL1	-1.73494	-2.89021	-1.70566	-2.36485	-0.661692	-1.79266	-1.73494
ATAD1	-1.50711	-0.867838	2.52014	-2.85346	-0.292491	-1.47639	NA
ATAD2	5.70273	4.93223	0.611624	4.02753	5.85733	5.29414	5.70273
ATE1	-5.58598	-4.76911	-2.91671	-5.45341	-2.52699	-5.45154	-5.58598
ATF1	-0.557766	-0.0127775	-1.16918	-1.04483	2.09523	-0.938112	-0.557766
ATF7IP	1.66759	2.47481	0.821388	2.97271	1.40876	1.97717	1.66759
ATG12	-5.6102	-5.31787	-2.82985	-5.05439	-4.41774	-5.64454	-5.6102
ATG16L1	-2.86946	-2.12461	-2.63165	-3.6154	-2.18778	-3.00359	-2.86946
ATG3	-1.67966	-1.70866	-3.98315	-2.16555	-3.38486	-2.05718	-1.67966
ATG4B	2.90231	3.2559	3.907	1.66302	2.49208	2.91343	2.90231
ATG5	-1.19006	-0.991455	0.4067	-0.229843	-1.02259	-1.50625	-1.19006
ATG7	-3.27672	-3.95511	-3.53445	-3.97858	-6.54953	-3.32524	-3.27672
ATG9A	0.679566	0.970943	0.390326	0.335857	0.145953	0.618955	0.679566
ATIC	1.91457	3.39457	2.09532	1.69204	3.37275	1.45577	NA
ATL1	-1.80793	-1.36627	-1.63443	-0.0364869	0.66283	-1.67664	-1.80793
ATL2	2.74476	4.24011	2.21203	3.86214	7.1186	2.50136	2.74476
ATL3	-3.19007	-3.28732	-3.24344	-2.7878	-2.25634	-3.11624	-3.19007
ATOX1	-1.49423	-0.828073	-0.983964	0.556719	-3.42685	-1.69802	-1.49423
ATP11B	1.24415	0.694964	-1.57015	2.89358	3.92378	1.23793	1.24415
ATP13A1	2.58766	3.43597	1.88202	2.55134	3.52617	2.4847	2.58766
ATP1A1	3.53962	5.09993	4.28512	0.795929	4.83241	3.66445	3.53962
ATP1B1	0.257431	-0.336377	-2.181	-2.47221	2.97969	0.523531	0.257431
ATP1B3	1.9878	2.49059	0.645439	2.13576	0.989999	1.57925	1.9878
ATP2A2	0.836459	2.79878	0.412955	1.28951	3.43329	0.544841	0.836459
ATP2B1	0.24163	1.03029	-0.710291	0.224284	1.80218	-0.00371616	0.24163
ATP2B4	0.0838483	0.82158	-0.72138	2.24032	-0.331699	0.26715	0.0838483
ATP2C1	-1.55044	-0.392651	-2.61933	-0.13805	2.54766	-1.74079	-1.55044
ATP6V0A2	-1.59205	-0.405231	-1.63384	0.520162	1.14009	-1.59306	-1.59205
ATP6V0D1	-4.02601	-2.1249	-2.51358	-1.65221	-1.62487	-4.00308	-4.02601
ATP6V1A	-0.354303	-0.0546881	-1.83342	-1.61472	1.66275	-0.212612	-0.354303
ATP6V1B2	-9.71537	-8.25785	-6.83254	-4.78771	-6.26931	-9.96715	-9.71537
ATP6V1C1	4.80235	2.50269	-2.1907	3.3602	2.17935	4.77602	4.80235
ATP6V1D	-3.6377	-3.06555	-2.20991	-5.2543	-0.488632	-3.51495	-3.6377
ATP6V1E1	-3.56279	-2.61057	-1.56661	-3.45549	-1.89402	-3.67039	-3.56279
ATP6V1F	-1.01027	-0.145081	-1.81645	0.249036	1.88748	-1.30418	-1.01027
ATP6V1G1	-2.79006	-2.42498	-1.87346	-4.53268	-3.63738	-2.75259	-2.79006
ATP6V1H	5.36069	4.19782	-0.322134	2.82092	3.44115	5.49964	5.36069
ATP9A	11.1056	9.1988	3.87123	8.99501	4.6884	11.9042	11.1056
ATPAF2	-6.25976	-3.64726	-1.75327	-5.02176	-0.424211	-6.49126	NA
ATRAID	-0.671995	0.129607	-1.53169	0.534251	3.76358	-0.706747	-0.671995
ATRN	4.58724	5.76091	1.63183	4.21415	7.37771	4.86176	4.58724
ATXN10	-3.00949	-1.99362	0.266301	-2.1948	-0.154046	-3.37311	-3.00949
ATXN2	1.41486	4.13788	1.05385	1.66014	5.51675	1.566	NA
ATXN2L	3.70783	5.413	2.39921	4.54124	6.63932	3.66332	3.70783
ATXN3	-2.5469	-2.44069	-1.35592	-2.74562	-1.14487	-2.21924	-2.5469
ATXN7L3B	2.5645	3.36213	1.26121	3.42664	4.31791	2.48498	2.5645
AUH	-2.62645	-2.48346	-0.502937	-3.47538	-1.91697	-2.36986	NA
AUP1	1.91307	2.06758	0.609454	1.54276	2.1856	1.51751	1.91307
AVEN	-3.7818	-2.68714	-0.455264	-0.952111	-3.67722	-4.10392	-3.7818
AVL9	8.35688	7.51902	2.8953	5.95874	6.28956	8.20049	8.35688
B2M	-7.83231	-7.41346	-6.17403	-2.68237	-8.93787	-8.03913	-7.83231
B3GAT3	0.817229	1.56718	0.735816	-0.868303	3.10021	0.668967	0.817229
B4GALT3	2.17259	1.80568	-1.53482	-0.103273	2.86449	2.00213	2.17259
B4GALT4	0.305415	0.184699	-1.27263	-0.11924	1.40421	-0.0444333	0.305415
B4GALT7	1.5208	2.13	2.26131	-0.422201	3.60121	1.37701	1.5208
BAD	-1.11374	-1.24565	-1.4953	-2.97448	1.83883	-1.15146	NA
BAG1	-2.76229	-3.31694	-2.43114	-5.14264	-1.83874	-2.49448	-2.76229
BAG3	-2.08503	-1.42027	-0.045471	-2.48199	0.427288	-2.05976	-2.08503
BAG4	0.13899	0.565227	-3.00794	-0.917792	3.16948	-0.0934114	0.13899
BAG5	0.645434	2.06097	2.1116	-0.628142	3.06562	0.521754	0.645434
BAIAP2	-0.0874308	-0.123426	-1.1065	-0.950204	0.0717812	0.070472	-0.0874308
BAIAP2L1	4.47827	5.85289	2.28281	1.05355	6.58765	4.26969	4.47827
BAK1	-3.49954	-2.85688	-4.51128	-2.94239	-2.67002	-4.36145	NA
BANF1	3.25132	3.67942	2.74354	1.72258	4.22689	2.75064	3.25132
BASP1	-3.66396	-3.57158	-3.79303	-0.568949	-1.62275	-3.89415	-3.66396
BAX	-1.7826	-1.60744	-1.60765	-0.124918	-1.15194	-2.25301	NA
BAZ1A	-3.62063	-2.64656	-3.75255	-2.28534	-0.144298	-4.53303	-3.62063
BAZ1B	4.4934	5.18758	1.62304	5.08884	4.89266	4.07382	4.4934
BCAM	2.71673	4.52784	2.6612	3.00017	5.00159	3.05548	2.71673
BCAS3	1.46555	3.4948	0.555545	3.66798	2.70733	1.92375	1.46555
BCAT1	0.832132	-0.320105	0.0836482	2.87391	0.0982801	0.876251	0.832132
BCAT2	-0.239663	0.883178	0.104797	-1.8735	4.83304	-0.496149	NA
BCCIP	-1.85486	-2.31235	1.26519	-4.49174	-0.256274	-2.51778	-1.85486
BCKDHA	-2.83656	-2.1809	-3.33742	-4.64237	1.04728	-2.73827	NA
BCKDHB	-0.0386485	0.402115	0.315287	-2.50182	2.99232	0.111668	NA
BCKDK	0.832041	0.927709	-2.09436	0.708379	0.626456	0.72139	NA
BCL10	-6.10504	-5.95971	-4.54175	-6.83736	-4.58954	-6.38569	-6.10504
BCL2L1	5.13612	4.02302	-1.1562	2.72338	1.10384	5.35763	NA
BCL2L13	-3.1713	-1.409	1.06764	-3.77786	0.422271	-3.34632	NA
BCLAF1	-3.34255	-3.14728	-2.88108	-3.56062	-2.68901	-3.53673	-3.34255
BCS1L	0.871234	1.33459	1.14068	-0.667505	1.17774	0.521433	NA
BDH1	3.35753	4.39218	1.46086	0.137773	5.42412	3.16899	NA
BECN1	-4.62027	-3.6912	-5.35687	-4.04024	-2.70451	-4.60302	-4.62027
BET1	1.52473	1.06145	-1.51279	0.163135	2.30355	1.51285	1.52473
BET1L	-2.54965	-1.60758	-0.00136102	-2.49177	-0.637451	-2.20945	-2.54965
BICD2	-0.638403	0.0728749	1.29093	0.102238	-1.48245	-0.577082	-0.638403
BID	-2.19337	-0.77387	-0.0578152	-0.265393	-1.31628	-2.92462	NA
BIN2	-7.46899	-8.66069	-7.59366	-0.7383	-9.36643	-7.48795	-7.46899
BIN3	-5.24621	-3.25685	-0.96181	-4.12393	-2.1876	-5.14163	-5.24621
BIRC2	-4.33201	-3.28076	-4.30713	-2.69166	-3.88121	-4.43009	-4.33201
BLMH	-2.78632	-1.40887	-2.86694	0.449788	1.85391	-3.2112	-2.78632
BLNK	-7.38721	-6.67298	-6.65424	-5.1909	-5.57283	-7.17557	-7.38721
BLOC1S2	-4.20533	-3.3553	-1.68433	-3.82928	-1.93089	-4.47039	-4.20533
BLOC1S3	2.65135	3.91008	3.25097	2.99831	1.27249	2.40751	2.65135
BLOC1S4	-1.38549	-1.21674	2.21315	-2.49276	-1.96938	-1.52497	-1.38549
BLOC1S6	-2.73037	-1.36373	0.0915689	-0.717872	-2.69674	-2.83576	-2.73037
BLVRA	-2.89064	-3.01065	-4.41088	-0.988957	0.613649	-3.05693	-2.89064
BLVRB	-1.05624	-0.657058	-1.35844	-1.79608	0.357342	-1.35621	-1.05624
BMP2K	-4.4198	-4.40541	-2.84236	-1.18037	-5.17887	-4.31552	-4.4198
BMS1	-1.09105	-0.048142	-0.207813	-0.964849	2.49299	-1.86932	-1.09105
BNIP1	-2.17529	-2.46672	-1.39799	-3.19506	1.44373	-2.83772	-2.17529
BNIP2	-4.28657	-3.71654	-1.42885	-0.871552	-6.01183	-4.1562	-4.28657
BOD1	3.06013	3.65532	4.15919	2.24356	4.54529	2.93991	3.06013
BOD1L1	-0.854682	-0.740273	2.3352	0.477262	-4.15378	-0.478603	-0.854682
BOK	-3.99177	-3.95619	-3.73011	-4.66635	-1.20652	-3.65588	-3.99177
BOLA1	2.92496	2.14339	-0.0346375	0.0850145	3.53365	2.74281	NA
BOLA3	2.22857	2.97208	0.960127	0.87771	4.72707	1.339	NA
BPGM	-1.785	-2.20886	-3.88727	-3.37094	-1.6272	-1.80953	-1.785
BPHL	1.65967	1.95027	0.319922	0.334683	2.88111	1.63485	NA
BPNT1	-0.941104	-0.945946	-4.11496	-2.96696	0.886644	-1.06295	-0.941104
BPTF	3.04136	3.27003	2.16762	3.51597	3.66157	3.23427	3.04136
BRAT1	4.00854	4.99131	0.363188	2.40512	6.24011	3.83407	4.00854
BRD3	1.72578	2.20809	3.6614	0.99602	4.12111	1.65947	1.72578
BRD7	2.36839	4.35106	3.23175	1.95518	4.19548	2.19722	2.36839
BRD9	3.44867	5.08544	0.6646	4.50059	8.11755	3.15476	3.44867
BRF1	4.75849	4.41597	5.37697	1.27889	4.86517	4.72075	4.75849
BRI3BP	1.11546	1.75993	0.71449	-2.22709	5.13841	-0.0494413	1.11546
BRIX1	4.77734	5.11357	0.632301	2.89225	6.67756	4.13976	4.77734
BRK1	-1.88459	-1.47668	-1.86538	-3.97568	-3.1525	-1.91628	-1.88459
BRMS1	0.908477	1.26547	-0.235634	-0.510111	2.77345	0.382905	0.908477
BROX	1.40563	1.07772	-2.42594	0.256539	0.738531	1.37686	1.40563
BRPF1	2.55684	2.45299	2.91738	1.42798	0.311185	2.38053	2.55684
BSG	-1.23032	0.181726	0.148659	-2.82396	3.3062	-1.46006	-1.23032
BSPRY	-1.69202	-1.75259	-0.681223	-4.57762	-0.116541	-1.71702	-1.69202
BTAF1	-4.51914	-2.99801	-1.23289	-2.79733	-3.83349	-4.41279	-4.51914
BTD	-3.84337	-4.06859	-4.14985	-5.2468	-5.33162	-3.27181	-3.84337
BTF3	-4.07831	-2.70978	-1.40804	-5.418	-2.53123	-4.13062	-4.07831
BTF3L4	-0.0326276	0.478605	2.49029	-0.745996	1.07121	-0.442306	-0.0326276
BUD13	-1.17155	-0.616211	0.365435	-1.89595	0.545454	-1.4926	-1.17155
BUD31	1.20085	2.40603	-1.14342	2.8216	6.06807	0.627571	1.20085
BYSL	2.83503	3.96734	1.97529	2.67035	3.26921	2.1515	2.83503
BZW1	-2.40701	-3.55816	-2.99804	-4.51799	-3.20857	-2.90192	-2.40701
BZW2	3.22115	4.82296	0.567618	3.07748	5.39628	2.76733	3.22115
C11orf54	-1.20223	-0.576169	-0.729501	-1.92906	-2.04252	-0.784872	-1.20223
C11orf96	-3.26528	-4.12755	-3.25932	1.00914	-3.91866	-2.88813	-3.26528
C12orf29	-0.946323	-0.68752	-2.30929	-2.87816	0.435759	-1.44925	-0.946323
C12orf4	-1.92221	-2.16216	-5.65643	-1.51672	0.703854	-2.3961	-1.92221
C12orf45	1.66633	1.96229	0.976886	1.01957	2.42101	1.20695	1.66633
C12orf57	-4.10447	-3.35526	-4.6368	-4.76746	-0.714719	-4.16942	-4.10447
C15orf40	-2.13835	-1.3276	-0.261862	-2.93459	2.21012	-2.03404	NA
C16orf58	2.93387	3.10093	0.260134	1.08135	4.37253	3.36641	2.93387
C16orf70	0.180402	3.05705	2.98122	1.13458	3.89248	-0.0281502	0.180402
C17orf75	2.1427	2.58418	2.52952	0.54837	7.25803	2.07664	2.1427
C19orf12	1.04845	0.804411	-1.70483	3.80223	0.625709	1.18633	1.04845
C19orf25	-2.11286	-1.19788	-0.195749	-2.77133	0.470067	-2.25169	-2.11286
C1D	-0.722157	-0.384902	-2.78471	-0.71358	1.63753	-0.895147	-0.722157
C1orf122	-0.162162	-0.0236112	0.812793	-1.33494	1.59767	-0.553448	-0.162162
C1orf131	5.16115	4.09606	1.70317	1.89507	4.37616	4.73549	5.16115
C1orf174	-4.196	-2.5502	0.224561	-3.02844	0.144332	-4.68972	-4.196
C1orf198	2.79682	2.67529	0.343696	3.18841	2.35084	2.84112	2.79682
C1orf21	1.23894	-1.14926	-1.19675	-0.861506	-1.33403	1.45666	1.23894
C1orf50	-3.58813	-2.86985	-3.24434	-3.12673	0.206703	-3.63564	-3.58813
C1QBP	-5.38859	-2.66646	-0.845885	-5.86649	0.262364	-6.10932	NA
C1RL	-2.58336	-2.07247	-3.83889	-1.80209	-0.640449	-2.36486	-2.58336
C1S	-4.15668	-3.59263	-3.91067	2.87302	-3.80892	-4.13294	-4.15668
C20orf27	4.03466	4.71538	1.0867	4.3068	3.5526	3.58856	4.03466
C2CD5	2.3128	1.74017	-0.955686	-0.266179	3.9374	2.32279	2.3128
C2orf49	1.26867	1.37203	0.502806	0.36362	2.97631	1.38689	1.26867
C2orf69	0.111448	0.956681	-0.801403	-1.77567	3.20489	-0.44145	NA
C2orf76	-0.104212	1.41129	-0.306898	0.360838	2.80141	-0.141661	-0.104212
C4orf33	-4.80023	-4.80515	-1.92565	-4.06872	-3.5727	-4.73048	-4.80023
C5	-0.161248	-0.614264	0.402892	-0.91565	0.443738	-0.0294106	-0.161248
C5orf51	3.28935	4.27911	-0.153852	3.36504	6.78345	2.95878	3.28935
C6orf132	2.3396	2.6926	1.574	1.27444	1.77327	2.31002	2.3396
C6orf203	-0.734076	-0.43551	1.47381	-1.09745	-0.0405174	-0.912526	NA
C6orf89	-0.925231	-1.17808	-2.59421	-0.378976	-1.68679	-0.44601	-0.925231
C7	-5.61778	-5.15732	-5.37398	0.119653	-5.6766	-5.1248	-5.61778
C7orf26	3.00184	4.01105	-0.135905	2.69351	6.54321	3.04055	3.00184
C8orf33	10.6005	8.49623	3.87159	6.78738	6.83846	10.3685	10.6005
C9orf64	-4.31198	-4.39937	-2.89877	-5.18582	-1.85985	-4.38686	-4.31198
C9orf78	-1.95515	-2.26571	0.428088	-2.29976	-1.39773	-2.08235	-1.95515
CA12	-2.59939	-2.22665	-1.37242	-5.2115	-1.19914	-2.60738	-2.59939
CA2	-5.36595	-5.88717	-5.85095	-5.75239	-3.26509	-5.35331	-5.36595
CA8	-3.95555	-4.00613	-3.41216	-4.38549	-0.489266	-3.86188	-3.95555
CAAP1	-2.45086	-1.9906	-0.881706	-4.59168	-1.37071	-2.56293	-2.45086
CAB39	-5.59681	-5.59423	-5.51946	-3.75818	-6.30146	-5.47107	-5.59681
CAB39L	2.64366	2.54966	1.87827	3.28887	-2.40486	3.68318	2.64366
CACNA2D1	-2.66842	-1.94496	-2.45876	2.56849	-1.44298	-2.54726	-2.66842
CACTIN	0.457368	2.10792	2.42162	0.492708	2.02268	0.213806	0.457368
CACUL1	-3.8573	-2.70825	-0.626515	-2.76879	-1.71216	-3.92074	-3.8573
CACYBP	4.12861	4.28831	2.3889	2.56726	4.25386	3.48766	4.12861
CAD	2.92024	3.56143	2.36641	2.77361	7.58675	2.61447	2.92024
CADM1	-1.72221	-1.3181	-1.10785	-0.51414	1.63426	-1.34239	-1.72221
CALCOCO1	-3.21258	-3.28379	-3.80169	-1.05281	-4.05828	-2.37222	-3.21258
CALCOCO2	-3.81263	-3.91127	-5.59186	-0.841705	-5.65771	-3.59623	-3.81263
CALD1	-4.00226	-3.93131	-4.33534	2.07712	-5.72506	-3.67603	-4.00226
CALR	-1.04479	-0.592502	-1.54641	-0.914402	0.806851	-1.34089	-1.04479
CALU	0.372337	0.809362	-0.70697	1.94392	0.633793	0.0779031	0.372337
CAMK1	-4.76609	-3.90974	-4.76313	-2.26342	-4.17886	-4.76955	-4.76609
CAMK2D	-3.23945	-3.19923	-0.793041	-0.991775	-2.92939	-3.11336	-3.23945
CAMK2G	-2.13044	-0.487288	0.734082	1.04043	-0.562678	-2.16728	-2.13044
CAMKMT	0.399395	2.07786	-0.36164	1.10344	1.85467	0.309492	0.399395
CAMLG	-1.85389	-0.634994	-0.284562	-1.42935	-2.43441	-1.75339	-1.85389
CAMSAP3	2.68594	4.5677	3.30958	0.0646626	5.09655	2.69201	2.68594
CAND1	1.57139	1.28692	-1.60576	1.07675	2.68426	1.11802	1.57139
CANT1	-0.000775689	-0.0806521	-2.52955	-1.74558	1.84011	-0.325584	-0.000775689
CANX	-2.16021	-0.289228	-1.87744	0.694262	1.15196	-2.42134	-2.16021
CAP2	0.155552	-0.0969736	-0.195047	1.84358	-1.54565	0.439638	0.155552
CAPG	-1.9896	-1.2742	-2.83301	-0.336237	-1.70705	-2.2953	-1.9896
CAPN1	1.64663	2.32012	1.40504	0.280934	3.18879	1.59323	1.64663
CAPN15	2.54063	3.06335	1.68899	1.87602	0.849811	2.3327	2.54063
CAPN2	-2.58387	-2.73992	-4.21216	-2.73625	-1.35602	-2.29985	-2.58387
CAPNS1	-2.53783	-1.70133	-3.90737	-1.98026	-0.735382	-2.63556	-2.53783
CAPRIN1	-0.768755	-0.752241	-1.55561	-1.7109	1.56007	-0.990587	-0.768755
CAPZA2	-1.91456	-2.21542	-5.2306	-1.05341	-1.78833	-1.97041	-1.91456
CARHSP1	0.097498	0.197489	-1.10177	-0.241775	-2.16496	-0.37895	0.097498
CARM1	3.33906	3.95003	2.89393	2.92615	3.85146	2.98665	3.33906
CARS	-2.53788	-1.68873	-0.774791	-2.06146	-1.01371	-3.0475	-2.53788
CARS2	1.10349	1.55738	-1.77568	0.0458895	-0.679794	0.988689	NA
CASC3	1.31864	2.60531	0.872566	4.03711	6.08386	1.19909	1.31864
CASC4	-5.86497	-4.58208	-2.57539	-5.67	-0.835303	-5.62848	-5.86497
CASKIN2	2.71511	3.12723	1.79922	2.62745	3.53047	2.89249	2.71511
CASP1	-7.34258	-7.34399	-7.33327	-4.43072	-9.86177	-7.4547	-7.34258
CASP10	-5.40656	-5.60208	-5.94057	-1.18243	-6.17134	-5.36468	-5.40656
CASP3	-5.51548	-4.61709	-1.45284	-3.34424	-4.02088	-6.71045	-5.51548
CASP4	-6.01721	-5.57398	-5.96183	-4.68543	-8.31552	-6.27961	-6.01721
CASP7	-4.59402	-4.35215	-3.06393	-3.83231	-4.35487	-4.78133	-4.59402
CASP9	-3.90578	-3.08586	-0.752326	-3.83541	-1.10833	-3.86006	-3.90578
CAST	-4.37798	-3.30373	-2.17503	-4.17291	-2.2793	-4.17714	-4.37798
CAT	-2.37804	-2.64902	-3.26025	-2.69558	-1.47794	-1.83054	NA
CAV1	-4.82774	-5.13835	-5.26432	-2.37384	-4.83742	-4.59667	-4.82774
CBFB	-2.04232	0.253645	0.146387	0.0361717	0.541271	-2.54313	-2.04232
CBL	-0.424603	0.878553	0.881407	2.41311	-1.10099	-0.403502	-0.424603
CBLB	-2.75734	-3.21666	-4.18078	-1.19326	-4.69221	-2.42704	-2.75734
CBLL1	6.31227	6.64185	2.45425	4.24624	6.02106	6.18243	6.31227
CBR3	-3.84708	-3.58336	-2.88513	-3.59284	0.349435	-4.10972	NA
CBR4	-4.42936	-3.55846	-0.22701	-5.61181	-3.30187	-4.2613	NA
CBX1	4.12011	4.84691	3.34847	3.75966	6.00844	3.56321	4.12011
CBX3	2.53161	3.99854	-0.998074	3.55211	4.98585	1.92059	2.53161
CBX8	4.616	4.86646	3.30346	2.78027	5.14477	4.27965	4.616
CC2D1A	4.77005	6.31975	3.44051	2.86942	5.42497	4.71779	4.77005
CC2D1B	-1.0669	-0.829512	1.29799	0.116289	-1.77693	-1.08305	-1.0669
CCDC115	-0.249146	0.107613	-0.524242	-0.494619	0.432039	0.0966053	-0.249146
CCDC117	-0.851491	0.316119	1.28958	-1.20718	2.04253	-1.30412	-0.851491
CCDC12	0.868291	-0.417454	0.795372	-3.02641	-0.238668	1.0535	0.868291
CCDC124	1.88666	2.48766	1.02568	0.659622	2.5454	1.5751	1.88666
CCDC127	1.80247	1.71036	-2.47307	-0.29896	5.02008	1.52521	NA
CCDC137	2.32183	2.33476	0.106999	1.19364	2.15335	1.56559	2.32183
CCDC25	-6.3421	-4.81271	-2.47838	-5.92224	-2.79841	-6.44964	-6.3421
CCDC28A	-5.19638	-4.54588	-4.65809	-3.79941	-4.19553	-4.87686	-5.19638
CCDC43	-0.817027	0.786199	-0.751142	-0.346133	2.48394	-1.52954	-0.817027
CCDC47	2.16968	2.57467	0.13473	1.17473	2.62782	1.99265	2.16968
CCDC50	0.0145512	-1.48148	-2.88527	0.949585	-2.83018	0.409663	0.0145512
CCDC51	-0.287108	0.22624	-0.130712	-2.25955	1.1975	-0.698766	NA
CCDC58	1.39303	2.3277	0.101426	0.242287	4.97539	0.894286	NA
CCDC6	-2.10786	-0.648253	-0.402711	-1.447	0.897251	-2.43096	-2.10786
CCDC61	-0.462393	0.722112	-0.329239	-0.855813	0.899549	-0.373615	-0.462393
CCDC71L	-0.853773	-1.15216	-3.1651	2.82964	-2.44361	-0.847189	-0.853773
CCDC86	5.57996	6.93114	6.30896	3.45862	6.44515	5.04654	5.57996
CCDC88B	-2.73044	-2.9564	-2.97861	-0.144686	-6.32928	-2.64579	-2.73044
CCDC9	-1.06023	-0.865635	-0.740786	-1.56162	-0.97953	-1.03972	-1.06023
CCDC90B	-1.66924	-1.75243	-2.54529	-1.54891	-1.83098	-1.70738	NA
CCDC91	0.724605	0.834028	-2.36817	0.0485025	2.75802	0.571176	0.724605
CCDC92	1.65927	3.38013	1.36399	3.45473	3.10048	2.18411	1.65927
CCDC93	0.0410461	1.41827	-0.512821	1.16366	1.9952	0.0602596	0.0410461
CCDC97	0.47832	1.92608	-0.0316576	1.1482	2.64464	0.452479	0.47832
CCM2	-0.299153	0.648193	-4.42077	1.94273	-0.501713	-0.764582	-0.299153
CCNB1	1.49022	3.20517	2.88516	1.24741	3.82007	-0.236498	1.49022
CCNH	-7.30569	-6.73397	-4.75211	-6.3152	-7.33717	-7.11507	-7.30569
CCNK	1.46751	3.37888	2.24965	1.88061	5.26581	1.20706	1.46751
CCNT1	1.18383	1.86857	0.32438	0.0999734	4.00584	0.854946	1.18383
CCNT2	-0.238807	-0.244282	0.398075	-0.954698	0.515177	-0.0540138	-0.238807
CCNY	0.18669	0.389116	0.610977	0.423607	1.29496	0.0283048	0.18669
CCS	-0.535866	-0.628646	-1.90269	-0.968759	1.86726	-0.449488	-0.535866
CCT3	2.37209	2.33996	-0.381529	1.41177	2.74114	1.75514	2.37209
CCT8	-3.06642	-1.99667	0.166176	-2.86409	-2.02865	-4.041	-3.06642
CD109	-2.3721	-2.57319	-2.16149	-0.225278	-1.61214	-2.50356	-2.3721
CD14	-7.63776	-7.22458	-7.38627	-1.5195	-7.88999	-7.76775	-7.63776
CD151	-3.10135	-1.59022	-1.76656	-3.84841	-2.89073	-3.02662	-3.10135
CD180	-6.82063	-7.76367	-6.48185	-1.54976	-8.72639	-6.87618	-6.82063
CD248	-3.21937	-3.76744	-3.2413	0.697665	-3.78591	-2.95873	-3.21937
CD276	-0.8818	0.641489	1.20024	1.64785	1.73456	-1.10865	-0.8818
CD2AP	-1.46309	-1.91276	-3.74775	-1.81533	-1.22623	-1.69136	-1.46309
CD2BP2	1.51751	1.24077	-1.7601	0.974416	1.87959	1.54932	1.51751
CD300A	-7.16899	-7.92092	-7.16925	-1.52467	-6.84292	-7.54386	-7.16899
CD34	-5.03094	-5.68802	-5.03529	0.713723	-5.50226	-4.54423	-5.03094
CD36	-2.69298	-3.35446	-2.37347	-0.256121	-3.03799	-2.40283	-2.69298
CD4	-5.44472	-6.13189	-4.9722	1.03353	-9.18942	-5.28293	-5.44472
CD44	-3.7099	-3.60125	-3.95933	-3.40568	-1.96246	-3.8064	-3.7099
CD46	1.49888	0.911605	-1.02209	0.211484	1.79916	1.90622	1.49888
CD47	-1.43045	-1.61377	-2.47412	0.777601	-3.89219	-1.4446	-1.43045
CD48	-8.40283	-9.16151	-7.63014	-1.31481	-10.4543	-8.50652	-8.40283
CD55	-1.81969	-1.60557	-2.47132	-0.88673	-0.140867	-1.70097	-1.81969
CD58	-4.92425	-4.32162	-4.42024	-2.34334	-5.64827	-4.97378	-4.92425
CD63	-2.43385	-2.76896	-3.75452	-0.648739	-2.25923	-2.23077	-2.43385
CD74	-6.10313	-5.87514	-5.95058	-0.291936	-8.353	-5.9177	-6.10313
CD82	-1.66468	-1.64593	-1.64558	-2.25301	-0.663908	-1.67933	-1.66468
CD9	3.30363	4.18581	1.21734	2.80931	7.05581	3.43788	3.30363
CD93	-6.35151	-6.91292	-5.74558	0.482616	-7.05558	-5.95948	-6.35151
CDA	-4.27105	-3.57662	-3.37332	-2.68991	-3.88423	-4.24643	-4.27105
CDC123	0.98185	0.358895	0.974149	-0.0319873	-1.31198	0.35931	0.98185
CDC26	-3.20299	-3.08319	-2.2171	-2.63093	-3.59198	-3.37817	-3.20299
CDC34	0.891936	2.20079	2.90711	0.24241	2.81562	0.50049	0.891936
CDC42	-6.3869	-5.66484	-2.24303	-6.40693	-6.74398	-6.42936	-6.3869
CDC42BPA	0.624401	0.981564	-1.1052	1.56402	1.45798	0.976576	0.624401
CDC42BPB	1.23349	2.87238	2.11563	-0.354424	4.38333	1.35184	1.23349
CDC42BPG	2.17421	3.03699	2.04669	-0.110775	4.2243	2.34945	2.17421
CDC42EP1	-3.29444	-2.86592	-1.67168	-2.5753	-1.89163	-3.40429	-3.29444
CDC42EP5	-4.52444	-5.33593	-4.51163	-1.8946	-4.35377	-4.37867	-4.52444
CDC73	-1.81982	-2.25748	-5.45795	-2.96332	1.14989	-1.9483	-1.81982
CDCP1	-0.471236	-0.0773394	-0.434413	-2.05035	0.452034	-0.946279	-0.471236
CDH1	2.87131	6.05217	4.86436	2.1748	4.64495	2.65927	2.87131
CDH11	-2.14082	-2.65368	-1.88611	2.58329	-2.56978	-1.75109	-2.14082
CDH13	-2.85281	-3.08744	-2.94612	-0.132313	-4.14154	-2.50987	-2.85281
CDH5	-3.73094	-5.37269	-3.76638	0.220478	-5.36515	-3.25726	-3.73094
CDIPT	4.09067	3.82352	1.84877	3.31789	3.96371	4.48463	4.09067
CDK1	3.2848	3.46267	4.72615	2.31645	3.68186	2.27523	3.2848
CDK12	1.4327	1.80297	1.67024	1.83619	4.48892	1.19234	1.4327
CDK13	4.87092	6.0982	0.266396	5.49655	5.99319	5.13926	4.87092
CDK18	2.042	2.90228	1.33769	2.21633	1.64075	2.11979	2.042
CDK2	0.527423	1.06355	-0.188013	2.00185	3.75421	-0.402045	0.527423
CDK4	4.89882	5.34008	2.746	4.52048	5.93128	4.31474	4.89882
CDK5	1.34945	1.52976	-0.69943	-0.856194	2.15132	0.931675	1.34945
CDK5RAP1	11.0462	9.39163	2.86988	6.12728	6.3338	10.8127	11.0462
CDK5RAP3	-0.353453	0.93725	-1.18616	-0.632277	0.411258	-0.383452	-0.353453
CDK7	-3.38784	-1.60401	-1.16754	-4.39092	-2.17227	-3.71023	-3.38784
CDK9	-3.07447	-1.73984	-2.50578	-1.03905	-2.44211	-3.04202	-3.07447
CDKAL1	4.77992	4.13765	3.2631	5.60563	3.11804	4.58672	4.77992
CDKN1B	0.663766	0.00359814	-0.50446	2.05658	-0.137175	0.751873	0.663766
CDKN2AIP	-6.51789	-5.38877	-1.60576	-5.56146	-4.37831	-6.45737	-6.51789
CDKN2AIPNL	0.486467	1.42756	2.55572	-2.10024	2.57464	-0.0165282	0.486467
CDKN2C	-0.367327	-0.276111	0.361566	0.98504	0.185894	-0.905225	-0.367327
CDS2	0.920998	0.487475	-2.48375	1.70887	0.0809458	1.35018	0.920998
CDV3	-0.611459	-0.578588	-3.17133	0.455414	-0.99888	-1.10967	-0.611459
CDYL	4.2802	4.12506	3.06971	3.36226	2.63249	4.04736	4.2802
CEBPZ	1.60746	1.96692	0.657467	1.21099	3.68269	1.14959	1.60746
CELF1	1.95441	3.72522	2.43627	2.13499	3.43855	1.80783	1.95441
CELF2	-6.60445	-7.17797	-6.64409	-0.624744	-7.35167	-6.28049	-6.60445
CENPB	2.13794	1.53332	-1.23042	1.14207	2.70105	2.04103	2.13794
CENPC	-4.50785	-4.88577	-1.92166	-2.82335	-3.4839	-4.34961	-4.50785
CEP170	-0.916714	-1.59537	-3.41237	2.13687	0.247782	-1.11985	-0.916714
CEP170B	1.61518	2.68677	2.23755	-0.578234	4.76898	1.4681	1.61518
CEP41	5.21713	4.93798	3.16007	3.4591	5.01356	5.10908	5.21713
CEP44	-2.40912	-1.13397	1.77179	-1.38614	0.351063	-2.43834	-2.40912
CERS2	2.88528	2.09451	0.00277917	1.83825	3.32896	2.95592	2.88528
CERS6	1.38531	2.39445	0.687538	-0.0751489	3.47632	1.20059	1.38531
CES1	0.835816	0.954774	0.911645	3.28021	1.07859	1.21533	0.835816
CES2	-0.604909	0.697347	1.03184	-1.34481	0.287479	-0.392452	-0.604909
CETN3	-0.579232	0.892007	2.10623	-2.35344	1.04111	-0.782848	-0.579232
CFD	-5.46686	-5.51372	-4.81953	-2.32213	-5.43762	-5.24482	-5.46686
CFDP1	0.104271	2.3431	1.09051	2.65073	2.71972	-0.0872882	0.104271
CFL2	-2.35583	-2.72821	-2.21515	0.487466	-2.50982	-2.16257	-2.35583
CGGBP1	-1.60238	-2.98237	-1.60922	-2.45981	-5.06675	-1.31704	-1.60238
CGN	4.18813	4.75046	3.42857	2.72522	3.78516	4.32796	4.18813
CGREF1	2.53175	2.73609	1.82028	2.80328	2.60759	2.41023	2.53175
CHAF1B	2.06695	3.06771	4.22624	0.736218	4.38962	0.737092	2.06695
CHAMP1	1.89185	2.87206	-0.170659	2.12072	1.93551	1.75275	1.89185
CHCHD1	-4.26924	-4.07425	-2.91492	-6.74203	-3.48753	-4.64394	NA
CHCHD4	0.734699	0.924844	0.418081	-1.89058	-0.255475	0.202164	NA
CHCHD5	0.311344	-1.10291	0.248696	-0.57502	1.53283	0.216995	NA
CHCHD6	4.11486	4.32997	2.31728	2.57078	3.95518	3.84402	NA
CHCHD7	6.20822	6.08817	2.02705	4.57523	4.69156	6.05942	NA
CHD1	-3.33986	-2.514	-1.02387	-2.272	-4.5406	-3.4323	-3.33986
CHD3	-3.73796	-2.00759	-1.17893	-2.79665	-1.31794	-3.61454	-3.73796
CHD8	1.30872	2.14437	1.90294	2.53898	3.29275	1.33046	1.30872
CHDH	-0.00365055	0.761012	-0.0276112	-1.19568	0.852521	0.279651	NA
CHEK2	0.920944	2.98654	3.66466	0.714569	3.6228	-0.519689	0.920944
CHERP	4.44916	5.83761	3.52242	4.5796	6.58179	4.35312	4.44916
CHID1	-1.01675	0.363979	1.11656	-1.63716	1.90082	-0.968312	-1.01675
CHL1	-0.380598	-0.463981	-0.425159	0.453796	1.75968	-0.135367	-0.380598
CHMP1B	-2.9929	-1.22802	-0.270716	-2.48072	-0.731371	-3.07203	-2.9929
CHMP2A	-0.837506	0.109663	-1.21534	-0.22427	0.374444	-0.837005	-0.837506
CHMP2B	-1.73388	-3.50233	-1.52389	-4.64101	-3.75183	-1.78578	-1.73388
CHMP4B	7.17874	6.42679	-0.694871	3.93058	3.14667	7.28136	7.17874
CHMP4C	3.58055	3.29011	-0.841139	1.78673	3.88977	3.56367	3.58055
CHMP5	-3.47432	-3.44512	-3.17036	-2.9722	-3.1308	-3.57481	-3.47432
CHMP6	-1.57538	-1.3128	-3.59039	-0.639424	-0.117796	-1.68985	-1.57538
CHORDC1	-1.11191	-1.33149	-0.601281	-1.14057	0.0375047	-1.66386	-1.11191
CHP1	-4.65251	-3.04231	-0.477591	-6.21607	-0.3472	-4.60457	-4.65251
CHRAC1	8.80935	6.63455	1.42381	5.21767	6.68199	8.5557	8.80935
CHTF18	4.89886	5.38024	4.22928	2.94717	5.03774	4.30134	4.89886
CHTOP	-0.882944	1.17988	-2.01149	0.985587	5.0784	-1.30946	-0.882944
CHUK	-3.46488	-3.01354	0.206565	-3.13351	-1.5008	-3.84846	-3.46488
CIB1	-4.64819	-3.51386	-3.79826	-6.32279	-1.77215	-4.91756	-4.64819
CIR1	-1.93015	-1.18396	-2.091	-1.93124	-1.96465	-1.93263	-1.93015
CISD1	-2.59582	-2.29098	-0.802785	-3.3147	-0.427361	-2.85999	NA
CISD2	-2.02397	-2.4558	0.832574	-2.15996	-2.0156	-2.35275	NA
CIZ1	2.82997	3.41238	3.88447	1.94068	2.08892	2.66803	2.82997
CKAP4	-0.929647	-0.396784	-1.81135	-1.38911	1.45311	-1.49255	-0.929647
CKAP5	2.2585	4.43447	2.81727	2.61594	4.44033	1.47066	2.2585
CKB	2.44578	2.08672	2.68603	-0.132898	2.06389	2.48267	2.44578
CKS1B	2.87318	4.20478	0.611697	3.09914	4.49927	2.10878	2.87318
CLCC1	-0.97921	-0.543701	1.4445	-1.20125	-0.270012	-0.824423	-0.97921
CLCN7	3.75874	4.61846	2.52342	4.11594	2.52898	3.8963	3.75874
CLDN3	5.01726	5.24588	4.10439	4.93957	4.24101	4.88358	5.01726
CLDN7	-0.0848068	1.76139	0.344061	-2.23441	2.98613	-0.421368	-0.0848068
CLDND1	-1.48525	-2.44741	-3.97029	-1.33165	-0.508797	-1.65125	-1.48525
CLEC11A	-2.77478	-2.91705	-2.77089	0.591391	-3.36379	-2.43298	-2.77478
CLEC16A	3.45578	3.97308	1.80567	3.91619	5.37203	3.78005	3.45578
CLIC4	-4.19919	-3.89482	-1.39282	1.15592	-4.31364	-4.11537	NA
CLIC5	-5.41916	-5.88839	-5.61711	-2.73187	-5.93218	-4.92846	-5.41916
CLINT1	-0.806036	-0.240839	0.892379	-0.812523	0.932343	-0.891372	-0.806036
CLK3	-2.091	-0.917016	0.905325	-2.32838	0.455175	-2.05259	-2.091
CLMN	-1.8017	-2.18178	-1.47434	-2.7108	-1.79569	-1.3742	-1.8017
CLN5	-3.32173	-2.33336	-5.56417	-0.926388	-2.67193	-3.08643	-3.32173
CLNS1A	3.34618	2.46876	1.35334	2.28325	1.60741	3.08927	3.34618
CLP1	0.387922	0.274015	-0.0949763	0.0247789	0.762635	-0.0591119	0.387922
CLPB	5.01421	5.71767	3.74578	3.54805	6.58668	4.60372	NA
CLPP	-0.582887	0.583415	0.199884	-2.26913	1.64731	-1.11545	NA
CLPTM1	2.87204	3.8362	2.91241	2.07912	4.0737	2.70999	2.87204
CLPTM1L	3.1336	2.83754	-1.61355	1.85987	4.29052	2.78965	3.1336
CLPX	-6.32513	-5.30344	-3.32831	-6.78977	-3.40697	-6.46748	NA
CLU	-1.92932	-1.38551	-0.70826	0.246706	-2.66148	-1.31779	-1.92932
CLUH	-0.155538	1.76956	3.07951	-1.01789	3.57565	-0.440111	-0.155538
CLYBL	-0.31271	-0.651543	-1.94602	-1.13383	-0.169545	0.0982511	NA
CMAS	3.67413	4.02083	0.40204	0.966187	3.61864	3.20171	3.67413
CMBL	-1.56745	-1.78699	-4.14414	-3.13123	0.502364	-1.53033	-1.56745
CMC1	1.09345	1.15262	1.2759	-0.727798	-0.782652	0.687756	NA
CMC2	-0.613513	1.37173	1.70756	0.78918	2.7937	-1.54908	NA
CMIP	-0.590951	0.168439	0.208015	-0.20583	2.36484	-0.439718	-0.590951
CMPK1	-5.97108	-5.51779	-4.9497	-5.34479	-5.12983	-5.99196	-5.97108
CMPK2	-3.50362	-3.36694	-3.94569	0.0722488	-3.28579	-3.86002	NA
CMTM4	1.78422	5.14401	3.79714	0.823468	7.17246	1.74919	1.78422
CNBP	-1.56055	-1.61615	-2.5026	-2.45242	-1.18406	-1.81608	-1.56055
CNDP2	-7.11092	-6.31052	-3.7897	-5.02378	-6.82944	-7.08457	-7.11092
CNN1	-3.48267	-3.28645	-3.44617	2.12025	-3.67645	-3.10575	-3.48267
CNN2	-2.95775	-2.22978	-1.7859	1.64374	-1.64761	-3.00018	-2.95775
CNNM3	2.36979	2.84311	1.3663	1.20804	3.74109	2.61055	2.36979
CNNM4	3.56726	4.65958	2.81501	1.37412	5.61164	3.39192	3.56726
CNOT4	1.43772	2.17719	-0.98864	1.42619	1.25627	1.6851	1.43772
CNOT7	-3.54408	-1.44591	1.104	-3.44701	-0.03703	-3.94641	-3.54408
CNP	-2.25115	-1.2569	-2.734	-0.811268	0.183987	-2.65752	-2.25115
CNPY4	0.695833	-0.831568	-0.286388	2.90514	-1.29033	0.950838	0.695833
CNRIP1	-5.35529	-5.86762	-5.176	1.02311	-8.55955	-4.91749	-5.35529
COA3	-0.358793	0.151772	-0.365651	-1.7785	1.42837	-0.526029	NA
COA4	2.7763	2.5815	1.17494	1.29443	1.64995	2.44894	NA
COA5	2.03969	1.88365	0.459278	1.13549	3.99194	2.23903	NA
COA6	3.30211	3.16445	-0.232481	0.674029	4.09324	2.76641	NA
COASY	0.267257	1.33163	0.207246	-0.888997	2.67309	-0.0522729	NA
COBL	1.34728	-0.468397	-1.34205	-0.62235	-1.83916	1.79939	1.34728
COBLL1	1.71341	1.85978	1.49697	1.87351	1.78129	2.13761	1.71341
COG1	0.11172	1.87529	-1.27915	2.08364	2.08322	0.18799	0.11172
COG2	2.76099	2.34955	-1.29514	-0.0635297	3.51151	2.7374	2.76099
COG4	-0.194744	2.23298	1.93748	0.30224	1.96813	-0.534953	-0.194744
COG5	3.29642	2.92648	-2.09681	1.80224	2.94124	3.31254	3.29642
COG6	-1.42923	-1.42537	-3.46537	-0.764936	-2.21376	-1.11648	-1.42923
COG7	1.18107	1.54624	-0.887777	-0.7589	4.10196	1.55875	1.18107
COIL	3.42674	3.83411	1.93748	2.74846	2.77348	2.98386	3.42674
COL12A1	-1.46669	-1.82059	-1.44105	1.87586	-2.92806	-1.47834	-1.46669
COL14A1	-6.33271	-5.64704	-4.24799	-0.663134	-6.24022	-5.91591	-6.33271
COL15A1	-3.82919	-4.57688	-3.3473	2.57268	-4.59959	-3.66662	-3.82919
COL18A1	-0.93699	-0.273086	-0.437161	1.88413	-0.338431	-0.824905	-0.93699
COL1A2	-3.35599	-2.83095	-3.47664	1.95446	-2.68615	-3.29115	-3.35599
COL4A1	-1.3814	-1.86067	-2.13024	2.75348	-2.21128	-1.54956	-1.3814
COL4A2	-0.532762	-0.939497	-1.62995	3.4693	-1.41037	-0.59602	-0.532762
COL4A3BP	-5.5446	-3.71917	-3.20112	-5.1399	-2.19964	-5.33445	-5.5446
COL5A1	-1.79853	-1.81093	-1.66834	2.64041	-1.97058	-1.70782	-1.79853
COL5A2	-3.47734	-2.77448	-3.40509	2.04453	-2.915	-3.57774	-3.47734
COL6A1	-2.39371	-2.36256	-2.12542	2.22538	-2.22073	-2.26379	-2.39371
COL6A2	-3.67615	-3.50249	-3.46689	2.47496	-4.10457	-3.64558	-3.67615
COL6A3	-3.15184	-3.11339	-3.17414	2.71708	-3.4724	-3.01624	-3.15184
COLGALT1	-0.60174	0.319041	-1.86071	2.30485	0.0511919	-1.37183	-0.60174
COMMD2	2.04003	1.34386	-1.25763	2.02719	3.06279	1.84225	2.04003
COMMD4	-2.50107	-0.669702	0.750913	-3.12642	0.850505	-3.30124	-2.50107
COMMD6	-0.64983	0.768914	-2.33128	1.24822	-1.42162	-0.780122	-0.64983
COMMD7	1.85905	2.15156	-1.54097	5.16056	2.18519	1.66132	1.85905
COMMD8	-4.88374	-4.75305	-2.70464	-4.46567	-4.28237	-5.49542	-4.88374
COMMD9	0.277764	-0.275655	-1.31648	0.151559	-0.408016	0.0601633	0.277764
COMP	-1.20942	-0.606534	-1.26082	3.30301	-0.38248	-0.831742	-1.20942
COPA	0.307112	0.153084	-2.9019	-0.503108	0.759495	0.227531	0.307112
COPB2	-0.110525	-1.27427	-5.17174	-2.05206	1.37759	-0.434003	-0.110525
COPE	-1.83689	-0.527573	-2.29319	-1.1216	1.12543	-2.13204	-1.83689
COPG1	0.409773	-0.0272569	-2.14869	-1.87362	1.0914	0.276038	0.409773
COPS2	-4.08329	-3.63107	-0.829423	-4.64671	-1.221	-4.47076	-4.08329
COPS4	-5.05391	-5.16571	-0.995733	-4.60612	-2.65779	-5.25769	-5.05391
COPS5	4.1153	4.12224	-0.288947	1.79868	3.2532	3.76546	4.1153
COPS6	3.99708	4.64123	0.489306	2.27427	6.03145	3.61883	3.99708
COPS7A	1.07777	0.929143	-3.22054	-0.8865	3.49693	1.04631	1.07777
COPS7B	1.72976	2.61457	3.23137	0.404696	3.59921	1.49792	1.72976
COPS8	-0.810758	-1.14136	-0.479935	-0.0344201	-1.91437	-0.869478	-0.810758
COPZ1	0.204947	0.577416	-1.28938	-3.20619	2.44913	-0.188095	0.204947
COQ10B	-2.53311	-2.61291	-3.01589	-2.95679	-2.51156	-2.47104	NA
COQ3	-0.652762	-0.97421	-0.107869	-0.554287	2.00275	-0.965477	NA
COQ5	0.105172	-0.370236	0.0182732	-2.56464	2.59045	-0.324599	NA
COQ6	-3.16162	-1.37631	-1.80512	-4.83333	1.15946	-3.1786	NA
COQ7	2.38532	2.30235	0.697367	-0.753471	4.85162	2.56213	NA
COQ9	-0.561423	1.63922	0.931317	-1.88852	3.32628	-0.756217	NA
CORO2A	-0.650604	-0.18283	0.942048	-1.87423	0.987958	-0.716414	-0.650604
COX11	1.43985	1.57736	0.12662	0.262453	3.47447	1.17948	NA
COX15	-3.54215	-2.62406	-0.0924521	-5.41324	-1.23324	-3.42492	NA
COX19	3.16644	3.77533	0.95378	3.09859	5.51322	3.03554	NA
COX4I1	-2.48855	-0.467135	-0.700832	-2.42962	0.261323	-2.78705	NA
COX5A	-0.789673	0.727951	2.2522	-2.67052	2.77876	-1.33855	NA
COX5B	0.721275	1.60676	-0.401811	-0.618706	1.97823	0.240631	NA
COX6B1	0.54499	1.99553	0.0620468	1.45285	4.42692	0.259781	NA
COX6C	3.83839	2.72962	0.059164	0.419625	5.1865	3.69333	NA
COX7A2	-0.680985	-0.178495	-0.662311	-1.78577	-2.00008	-1.04519	NA
COX7A2L	1.47415	2.53617	0.741851	-0.840824	4.05526	1.19372	NA
COX7C	-2.93435	-2.30316	0.236314	-4.81393	-1.70187	-3.02442	NA
CPD	-2.56637	-1.17737	-2.71316	-2.30344	0.636957	-2.73524	-2.56637
CPE	0.986407	1.51333	1.22051	2.52727	1.41935	1.15365	0.986407
CPEB4	-3.91791	-3.73423	-3.52915	-3.01711	-3.98766	-3.3743	-3.91791
CPM	-4.27196	-4.7748	-4.65213	-1.40747	-4.9452	-3.93558	-4.27196
CPNE2	0.926728	1.66728	1.91246	2.4657	2.8424	0.994714	0.926728
CPNE3	2.5127	2.49775	-2.06673	2.23147	1.83817	2.48463	2.5127
CPOX	0.283006	-0.157547	-1.51335	-2.83624	1.69918	-0.128792	NA
CPPED1	-0.542505	-1.41989	-1.19973	0.694081	-2.98497	-0.20265	-0.542505
CPQ	-0.138193	-0.891345	-1.76547	3.04304	-1.28795	0.728787	-0.138193
CPSF3	3.06912	3.36926	1.9318	1.88318	4.34543	2.35128	3.06912
CPSF4	-0.766843	1.63746	-3.21405	3.46899	7.85201	-1.28557	-0.766843
CPSF6	-1.23956	-0.69977	-1.96046	-0.334794	1.32131	-1.38896	-1.23956
CPSF7	0.479991	2.02526	0.56938	0.93422	3.87592	0.426215	0.479991
CPT1A	2.9058	3.02944	1.21027	3.23935	3.29688	2.89009	NA
CPT2	-2.73464	-2.28694	-1.14571	-5.15773	-0.575121	-2.80601	NA
CRADD	-1.89916	-2.45739	-2.60116	-2.7623	-1.40343	-1.58747	-1.89916
CRBN	-2.27082	-3.02707	-2.78123	-1.83216	-6.06082	-1.74381	-2.27082
CREB1	-2.27811	-2.393	-2.58111	-1.05878	-2.13763	-2.14298	-2.27811
CREBBP	2.71066	4.10385	2.05098	3.81704	4.63724	3.0812	2.71066
CREG1	-1.6091	-1.6202	-4.45725	0.120132	-2.57034	-1.56446	-1.6091
CRELD2	-6.0576	-5.03454	-3.42955	-5.12651	-3.37987	-6.46931	-6.0576
CRIPT	2.70601	1.84654	0.920469	0.565093	4.08535	2.77013	2.70601
CRISPLD2	-4.80822	-4.49174	-4.50526	1.11394	-5.20895	-4.46715	-4.80822
CRK	-5.59504	-3.61448	-2.50317	-5.07283	-3.18088	-5.80812	-5.59504
CRKL	-1.05744	1.49228	1.96817	-0.292861	0.516128	-1.45681	-1.05744
CRLF3	-4.2227	-3.31507	-4.31313	-0.684858	-3.15423	-4.55511	-4.2227
CRNKL1	2.48841	1.35981	-3.08584	0.492825	1.93249	2.40777	2.48841
CROCC	-0.549603	-0.0778368	1.51102	-0.897097	0.0827151	-0.1116	-0.549603
CROT	0.588188	0.399977	-2.57661	0.68891	0.332576	1.12166	NA
CRTAP	0.189568	-0.238879	0.291455	1.4391	-2.37804	0.695174	0.189568
CRTC1	1.69609	2.92531	1.12836	1.80555	4.64961	2.1146	1.69609
CRTC3	-1.27109	-0.301679	0.0155624	1.20468	1.21002	-0.932945	-1.27109
CRYL1	-4.03405	-4.7256	-5.82909	-2.79862	-5.29812	-3.53694	-4.03405
CRYZ	-3.85929	-4.01357	-2.43285	-2.74068	-3.82054	-3.69485	NA
CRYZL1	-4.97096	-4.76807	-2.80138	-5.08591	-2.50046	-4.74273	-4.97096
CSE1L	6.73234	6.11339	2.16474	4.56028	4.6433	6.28861	6.73234
CSK	-3.44288	-2.78566	-1.64874	-0.282207	-2.82477	-4.00204	-3.44288
CSNK1A1	-3.01329	-2.66237	-2.32091	-4.20701	-2.20921	-3.05578	-3.01329
CSNK1G1	-2.92049	-1.6611	-0.566183	-3.21808	0.835474	-3.2554	-2.92049
CSNK1G3	-3.18228	-2.80405	-0.389823	-3.32224	-2.8234	-3.05257	-3.18228
CSRP1	-2.3562	-2.00061	-3.46557	0.541295	-2.57367	-2.08005	-2.3562
CSRP2	-0.151566	-0.0261002	-0.302897	1.39266	0.533159	-0.382852	-0.151566
CST3	-1.69496	-2.94211	-4.99623	-1.86358	-4.71793	-1.09896	-1.69496
CSTF1	8.49631	7.46051	2.07781	4.85376	6.40108	8.17745	8.49631
CSTF3	1.36292	1.75146	1.36354	-0.514978	2.42832	0.7495	1.36292
CTCF	-0.332975	1.58744	1.50181	0.819052	4.12069	-0.627839	-0.332975
CTDP1	-3.65288	-2.40087	0.938067	-2.38719	-2.25841	-3.87426	-3.65288
CTDSP1	-3.35623	-2.24981	-3.61147	-3.92172	-2.00989	-3.21372	-3.35623
CTDSPL2	-1.69613	-0.28514	1.71151	-1.20769	1.32657	-2.07787	-1.69613
CTH	-3.09797	-2.60515	-1.42366	-4.33054	-0.403072	-3.19828	-3.09797
CTHRC1	-1.76148	-0.713714	-0.723235	3.31784	1.0145	-1.93709	-1.76148
CTIF	-1.63923	-1.23881	-0.4191	0.539148	-0.0832469	-1.22843	-1.63923
CTNNA1	-1.83073	-0.368778	0.29617	-1.09273	-1.7006	-1.71154	-1.83073
CTNNB1	1.2552	1.10507	1.22642	2.37138	0.367005	1.52953	1.2552
CTSA	4.34115	3.53832	-1.1023	4.52005	0.29686	4.21215	4.34115
CTSH	-2.66736	-2.45773	-1.6767	0.130863	-2.10874	-2.15321	-2.66736
CTSL	-3.21624	-2.87862	-2.85622	-0.188159	-4.87371	-3.57981	-3.21624
CTSS	-5.38405	-4.92587	-5.20505	-0.194206	-9.12434	-5.52024	-5.38405
CTSZ	-1.31213	-0.828044	-2.7426	4.00945	-3.13519	-1.52755	-1.31213
CTTN	1.31035	1.8985	-3.19596	1.01231	3.56899	1.16743	1.31035
CUEDC1	2.12173	3.14181	1.65631	1.68234	2.33266	2.21626	2.12173
CUL2	0.569611	0.82501	1.16967	0.0884023	1.23296	-0.0901786	0.569611
CUL4A	2.02531	2.7402	-1.43663	1.85496	0.0579157	2.03208	2.02531
CUX1	5.54239	6.81651	3.03125	6.5426	6.70799	5.8136	5.54239
CWC22	0.443012	-0.621807	-1.02828	-0.0652276	-0.343423	0.167285	0.443012
CWC25	-0.0709517	0.5813	-1.05535	0.926228	1.21828	-0.111615	-0.0709517
CWF19L1	-2.78962	-1.97039	0.641031	-2.31597	-1.47631	-3.247	-2.78962
CXCL14	-3.00921	-3.01305	-2.83238	-1.90561	-2.32733	-2.55086	-3.00921
CXXC1	-5.0304	-3.35908	-1.05131	-4.30223	-2.82309	-5.28831	-5.0304
CYB5A	-3.39172	-2.86968	-0.715664	-3.8648	-0.967358	-3.24139	NA
CYB5B	-1.91161	0.622492	0.685643	-0.0432649	-0.210185	-2.14677	NA
CYB5R1	-1.16923	-2.33961	-3.81357	-1.97669	-3.69848	-0.719937	-1.16923
CYB5R3	-1.15015	0.208747	0.522362	-0.618613	1.16067	-1.05249	NA
CYB5R4	-4.7491	-5.18975	-4.247	-3.53171	-5.45107	-5.31539	-4.7491
CYBA	-7.24686	-5.73134	-6.58093	-2.82372	-6.26135	-7.5776	-7.24686
CYBRD1	-5.02743	-5.20156	-5.20519	-2.4762	-4.79751	-4.46383	-5.02743
CYCS	2.54146	3.77606	0.152083	1.65611	4.30442	2.01681	NA
CYFIP1	-6.43778	-5.98941	-2.10771	-3.99985	-4.63927	-6.52798	-6.43778
CYFIP2	-3.6758	-3.69897	-2.98571	-2.37823	-3.9832	-3.31935	-3.6758
CYGB	-4.65662	-6.30964	-4.40272	-1.2284	-6.5755	-4.14709	-4.65662
CYHR1	5.76641	4.95541	0.43335	3.24318	6.75518	5.79567	5.76641
CYLD	-6.51804	-6.22623	-7.28944	-2.34053	-7.31849	-6.31627	-6.51804
CYP20A1	-1.39173	-2.08636	-1.12459	-1.49453	-1.26079	-0.92684	-1.39173
CYP27A1	-1.62525	-0.631685	-1.58259	3.58666	-3.25036	-1.31269	NA
CYP2S1	1.92285	3.53369	1.80042	4.20452	1.07774	1.92089	1.92285
CYP51A1	1.49564	1.60952	-1.23734	-0.720747	3.26258	1.23545	1.49564
CYP7B1	-3.68698	-3.66547	-3.2193	1.87724	-2.81425	-3.35746	-3.68698
CYTH1	-3.13814	-2.27507	-4.73285	0.534527	-3.52889	-3.08043	-3.13814
CYTH2	0.378715	0.372084	0.888049	-1.74038	1.3754	0.629696	0.378715
D2HGDH	-0.174202	0.374298	0.138115	-0.749518	1.25238	0.130872	NA
DAAM1	-1.49627	-1.65698	-0.979758	-2.40408	-1.19295	-1.26884	-1.49627
DAAM2	-2.11712	-2.63894	-2.36673	-0.109735	-2.17434	-1.47335	-2.11712
DAB2	-4.10378	-4.32268	-3.77757	2.70867	-7.27983	-3.57431	-4.10378
DAD1	-2.98788	-2.87317	-2.49527	-4.44277	-0.805854	-3.34648	-2.98788
DAGLB	2.24892	2.92652	-2.02028	2.83785	2.46657	2.2802	2.24892
DAP	1.963	2.25453	-1.73301	1.21187	5.96324	1.90023	1.963
DAP3	2.70238	3.07129	0.525141	0.966874	4.08915	2.35955	NA
DAPK2	1.28555	2.02241	2.3271	0.145363	-0.668167	1.82362	1.28555
DAPK3	-2.1707	-0.924338	-0.804403	-0.577559	-1.52358	-2.29892	-2.1707
DARS	1.60638	1.44156	2.26689	2.35982	0.296457	1.23958	1.60638
DARS2	2.74116	3.01917	0.788005	2.41189	5.54861	2.23072	NA
DAZAP2	-0.632975	-0.20529	-1.61504	-0.452852	0.246129	-0.500591	-0.632975
DBI	-0.553349	0.0899942	-0.824024	0.227141	-0.372708	-1.11156	NA
DCAF5	-1.06902	0.224194	0.773593	-1.28314	1.05777	-0.641986	-1.06902
DCAF7	3.17256	4.67588	1.57033	5.13926	3.95059	2.97241	3.17256
DCAKD	2.05875	3.08146	2.17971	1.33218	4.22497	2.2836	NA
DCK	-3.73837	-2.5798	-1.42989	-2.83866	-3.75882	-4.31654	-3.73837
DCN	-5.12677	-5.70097	-5.159	1.18097	-5.18836	-4.7747	-5.12677
DCP1B	0.324077	-0.0349512	-2.35332	-0.330634	-0.760016	0.756271	0.324077
DCTD	-5.26129	-4.49494	1.202	-4.00553	-2.70075	-5.07247	-5.26129
DCTN2	3.19115	2.81573	1.52303	1.54331	2.83268	3.11074	3.19115
DCTN4	-3.14728	-2.55318	-3.02261	-3.36258	-1.54244	-3.05595	-3.14728
DCTN5	0.43087	1.17073	-1.3936	1.01334	2.22715	0.38482	0.43087
DCTN6	-5.79541	-4.95865	-2.47509	-6.43872	-3.22695	-5.81985	-5.79541
DCTPP1	4.48539	4.1654	2.12567	1.89535	4.84221	3.95403	4.48539
DCUN1D1	2.0836	3.20904	-0.973613	2.39929	6.05735	1.7857	2.0836
DCUN1D3	-2.11055	-2.53847	-3.61544	-1.59378	-2.24996	-1.72758	-2.11055
DCXR	2.28606	3.09269	0.981013	0.040628	3.89813	2.13115	NA
DDA1	2.39988	2.46587	1.03722	0.954983	3.13426	2.14034	2.39988
DDAH1	-3.62637	-3.01624	-2.28384	-3.49406	-1.46688	-3.52755	NA
DDB2	-5.27711	-6.04156	-5.19016	-6.23538	-2.78544	-5.47057	-5.27711
DDHD2	1.25293	0.916438	-0.740275	0.708225	1.24937	1.45612	1.25293
DDRGK1	1.04243	1.29131	-2.34867	-0.370727	2.81412	1.00202	1.04243
DDX10	0.243768	1.40845	2.03037	-0.00464719	1.00798	-0.0756368	0.243768
DDX18	2.17707	2.57542	1.52833	1.66782	3.24643	1.5524	2.17707
DDX19B	-1.13239	0.678849	0.101437	1.40139	0.207464	-1.01163	-1.13239
DDX20	-1.54403	-1.48216	1.26575	-2.533	-0.900392	-1.9822	-1.54403
DDX21	-2.22685	-0.618615	0.210719	-1.5862	-0.562055	-2.93653	-2.22685
DDX24	-2.97312	-2.55426	-3.07985	-2.96279	0.173885	-2.74859	-2.97312
DDX27	13.6202	11.3939	4.55866	9.88351	5.9741	13.4637	13.6202
DDX28	-0.725485	1.66308	1.36485	0.222235	2.69364	-1.27728	NA
DDX31	2.14884	2.83804	4.78169	1.14407	1.8892	1.82598	2.14884
DDX39A	3.47781	3.49741	2.24697	2.75754	2.8671	2.66428	3.47781
DDX41	-2.09243	-0.259026	-1.90614	-2.05831	0.797015	-2.58841	-2.09243
DDX47	-0.0776528	1.15122	-1.11439	0.44099	4.96088	-0.43157	-0.0776528
DDX49	3.32784	3.91446	2.7249	2.22723	4.22872	2.86191	3.32784
DDX50	-1.86412	-1.23529	0.369658	-0.781646	-1.01906	-2.10818	-1.86412
DDX51	5.15525	6.19331	5.53479	3.1884	6.15912	5.08078	5.15525
DDX52	0.553083	1.33098	0.471198	0.946267	2.12478	0.100746	0.553083
DDX54	0.0943607	1.36128	-0.838226	-0.700528	4.21688	-0.389887	0.0943607
DDX55	2.00877	2.53165	2.10076	0.558381	7.98812	1.60948	2.00877
DDX59	1.11318	0.671055	-2.20717	0.0677933	1.14243	1.15585	1.11318
DECR1	-1.24048	-1.94872	-5.07725	-2.07065	-1.19972	-1.3416	NA
DECR2	0.658783	-0.213733	-0.466094	-0.385329	0.400343	0.739419	0.658783
DEF6	-4.87703	-4.90572	-5.34249	-1.32244	-6.16663	-5.18306	-4.87703
DEGS1	-3.50651	-2.19071	-4.80573	0.578082	-1.04223	-3.76481	-3.50651
DEK	4.22245	3.02534	3.12856	3.49745	2.53897	3.53815	4.22245
DENND1A	1.43071	2.03194	2.77922	1.94	-0.590932	1.05484	1.43071
DENND2D	-4.73275	-4.62349	-3.35743	-4.73751	-5.45527	-4.78201	-4.73275
DENND3	-4.6188	-5.10912	-7.0641	0.579863	-7.39278	-4.2946	-4.6188
DENND4C	-2.08162	-2.34257	-0.43442	-2.45957	-5.04103	-1.62702	-2.08162
DENND6A	-1.84575	-2.43337	-1.519	-1.47415	-3.62856	-1.78136	-1.84575
DENR	1.12859	3.19945	1.10236	0.399356	6.33549	0.573255	1.12859
DEPTOR	-0.00873453	-0.337657	-2.88687	0.164166	-0.296555	0.356749	-0.00873453
DERA	0.647198	1.33144	-1.92899	-1.30344	3.1763	0.158783	0.647198
DERL1	5.07791	3.00419	-2.67386	4.15309	1.4167	4.77066	5.07791
DES	-2.85209	-3.5408	-2.85629	1.01273	-4.76684	-2.42135	-2.85209
DFFA	-1.18717	-0.363681	2.52706	-1.90225	1.52555	-1.49452	-1.18717
DFFB	-1.53245	-0.765023	1.80484	-1.60882	-0.122698	-1.61211	-1.53245
DGKA	-7.11451	-6.98345	-7.53323	-3.05665	-6.85678	-6.97184	-7.11451
DGKQ	-1.87247	-1.48233	0.0805012	-1.84038	-1.29589	-1.96626	-1.87247
DGUOK	3.74956	4.3703	1.84008	3.68939	5.2759	3.32122	NA
DHCR24	1.86636	3.1904	2.90005	-1.20241	4.28573	1.54887	NA
DHCR7	6.10809	6.68221	5.10646	3.2937	6.92405	5.72063	6.10809
DHFR	0.19007	1.44745	2.10334	-1.00455	2.10777	-1.25659	0.19007
DHODH	1.16235	4.84142	3.05808	1.552	5.07565	0.728721	NA
DHPS	-0.269381	0.114416	-0.570615	-3.46035	1.60475	-0.303829	-0.269381
DHRS1	-2.84166	-3.19039	-2.82211	-4.96438	-2.26544	-2.61477	NA
DHRS11	3.15827	3.88329	3.08143	1.27427	4.69471	2.91387	3.15827
DHRS3	-0.391023	-0.654342	0.95622	-0.605988	-0.592376	-0.0252094	-0.391023
DHRS7	-2.16873	-1.337	-1.63904	-3.50817	0.647066	-1.94789	-2.16873
DHRS7B	-6.30452	-4.38311	-3.95748	-4.90292	-2.02831	-6.27106	NA
DHX29	-2.17764	-1.61317	-0.439939	-3.2494	0.103508	-2.19537	-2.17764
DHX32	-2.70357	-2.6194	-0.574577	-4.56593	-0.0786139	-2.60286	-2.70357
DHX33	2.24887	4.16212	4.72536	2.26013	4.60453	1.93296	2.24887
DHX35	7.74456	7.0662	0.973074	7.95098	5.74375	7.68954	7.74456
DHX36	4.58525	3.63505	-0.172312	3.99193	4.23996	4.24861	4.58525
DHX37	3.60852	5.05627	3.40305	2.78094	5.53595	3.15625	3.60852
DHX57	1.66113	2.53938	1.08791	2.68463	5.06629	1.36302	1.66113
DIABLO	2.71923	3.4257	2.55826	0.914428	6.8103	2.2739	NA
DICER1	-3.79067	-2.77475	-3.61917	-3.11972	-1.16913	-3.60576	-3.79067
DIDO1	10.6272	8.4411	2.49403	8.12335	5.99287	11.3213	10.6272
DIMT1	-2.08691	-0.350965	-0.040714	-1.77739	0.0738897	-2.34617	-2.08691
DIP2B	0.823009	2.21436	0.399136	1.23945	3.37365	0.659703	0.823009
DIP2C	2.75172	2.0551	2.40272	5.33442	2.79852	3.43875	2.75172
DIS3	-1.27119	-0.82285	-3.60328	-0.939546	-1.52247	-1.29227	-1.27119
DLAT	-2.03535	-0.715463	-0.0757496	-3.87897	0.0265986	-2.23617	NA
DLD	2.81035	2.08208	-1.6687	-0.215275	3.77499	2.50421	NA
DLG1	4.50207	5.67904	1.14248	3.37221	8.18575	4.36882	4.50207
DLST	-2.99083	-1.39708	-1.44862	-4.07239	2.69275	-3.2338	NA
DMTN	0.561708	2.88811	4.03248	0.891466	3.25685	0.724303	0.561708
DNAJA1	-1.9692	-1.76	-1.45018	-1.34287	-2.2014	-2.69911	-1.9692
DNAJA2	-1.27162	-0.0861287	-2.27058	-1.10053	-0.372523	-1.47279	-1.27162
DNAJA3	4.78447	5.89292	3.41552	2.43633	5.50385	4.40892	NA
DNAJA4	-1.59401	-0.837877	0.39286	-2.67696	0.122719	-1.69595	-1.59401
DNAJB1	2.32254	2.51614	1.19689	-0.359474	1.14037	2.05689	2.32254
DNAJB11	3.42857	3.13651	0.0893641	3.41276	4.89853	2.85153	3.42857
DNAJB12	-2.6577	-1.52146	0.132719	-3.04154	-0.668752	-2.53519	-2.6577
DNAJB14	-4.48809	-4.01675	-0.793884	-2.36535	-5.63321	-4.25804	-4.48809
DNAJB2	1.25261	0.659422	1.09511	-1.71137	0.501817	1.67417	1.25261
DNAJB4	-5.20668	-4.50754	-4.8055	-2.2045	-4.19298	-5.21975	-5.20668
DNAJB6	-0.040496	0.693666	-1.18627	1.10612	-0.572177	-0.175513	-0.040496
DNAJC1	-5.34733	-5.99643	-5.2256	-5.30004	-6.33477	-5.35597	-5.34733
DNAJC10	-2.45807	-2.30216	-3.51707	-3.04373	-2.88857	-2.63563	-2.45807
DNAJC11	0.0559245	1.63913	4.60203	-0.780274	2.17013	-0.515122	NA
DNAJC16	-4.47631	-3.08975	0.101638	-4.81999	-1.40284	-4.21229	-4.47631
DNAJC17	-5.70044	-4.87361	-1.78009	-5.93346	-3.41416	-5.63706	-5.70044
DNAJC19	-0.717667	1.29806	-2.31221	1.71904	5.69042	-1.03497	NA
DNAJC2	6.25398	6.33987	1.91351	4.23869	5.95264	5.78015	6.25398
DNAJC21	3.17766	3.75466	-0.873444	2.06052	7.80386	2.90098	3.17766
DNAJC30	3.17257	3.04852	1.04675	0.806325	4.43939	3.17807	NA
DNAJC7	-3.11901	-1.89797	-3.90741	-2.27119	-1.79718	-3.72583	-3.11901
DNAJC8	-4.51584	-3.81795	-1.20196	-4.9129	-6.38745	-4.96932	-4.51584
DNASE2	1.3485	0.736909	0.327149	0.302529	2.00929	1.14792	1.3485
DNM1L	2.29908	2.31252	0.335971	1.22916	4.58968	1.85897	NA
DNPH1	0.974922	0.746289	0.0488094	0.545718	-0.288896	0.699751	0.974922
DNTTIP1	7.21619	5.95001	1.76485	5.48979	2.64193	6.86889	7.21619
DNTTIP2	-1.86217	-1.56602	0.484384	-2.22764	-2.89041	-2.49414	-1.86217
DOCK2	-9.28713	-9.75169	-9.04393	-1.48851	-10.2742	-9.24702	-9.28713
DOCK5	-4.73694	-3.6357	-2.43618	-3.71749	-2.40611	-4.67308	-4.73694
DOCK6	2.54138	3.70129	1.9955	4.03015	2.61134	2.9539	2.54138
DOCK8	-6.58039	-6.97868	-6.44334	-0.820873	-8.65301	-6.33306	-6.58039
DOHH	0.627193	1.48463	1.57658	-0.581911	2.943	0.170222	0.627193
DOK1	-1.91036	-4.71055	-2.04352	-3.15125	-5.57295	-1.70533	-1.91036
DOK2	-6.62275	-7.92282	-6.87928	-0.764833	-9.78057	-6.73013	-6.62275
DOK3	-4.519	-5.56142	-4.449	-2.02891	-6.35002	-4.64595	-4.519
DPCD	-4.08915	-3.73423	-1.0471	-6.40423	-0.640386	-4.32827	-4.08915
DPF2	3.34488	4.13085	2.98246	1.54812	4.52713	3.31697	3.34488
DPH2	1.91538	2.47695	3.17169	0.871096	2.83411	1.49998	1.91538
DPH5	-1.55422	-0.936126	0.464137	-2.47496	-1.57211	-1.78627	-1.55422
DPM1	4.03364	3.88906	-1.67717	5.37846	3.56086	3.8385	4.03364
DPM3	-0.62274	-0.222987	-1.90693	-3.68808	0.723787	-0.747946	-0.62274
DPP3	1.57311	3.46489	1.00138	1.6765	4.26183	1.09554	1.57311
DPP4	-3.33295	-4.36577	-3.56512	-0.459954	-4.0258	-3.10769	-3.33295
DPP7	-4.25707	-3.83778	-3.65268	-3.22713	-4.71231	-4.14552	-4.25707
DPP9	0.24354	1.13441	0.843805	0.752984	2.24229	0.0555251	0.24354
DPY19L1	1.06359	1.48365	-2.06403	0.947164	4.04201	0.809971	1.06359
DPY30	1.64694	2.45453	1.24361	-0.520741	3.72103	1.18414	1.64694
DPYSL2	-3.13609	-3.06722	-0.936567	1.39632	-3.85212	-2.69356	-3.13609
DPYSL3	-1.58817	-0.631863	-1.47799	4.21565	-0.161827	-1.46965	-1.58817
DR1	-2.56073	-1.34642	-0.878074	-1.83324	-3.16682	-2.84102	-2.56073
DRAP1	-0.296762	-0.212033	-1.10909	-0.666773	-0.302529	-0.883518	-0.296762
DRG1	-2.03481	-0.289541	1.53578	-2.6723	1.80251	-2.96433	-2.03481
DRG2	-3.08499	-0.71515	1.69228	-1.38896	0.581009	-3.28466	-3.08499
DSCC1	6.6568	5.56242	2.33051	4.7278	5.34569	6.26042	6.6568
DSG2	1.73609	2.95017	3.50523	0.471037	3.08803	1.42558	1.73609
DSN1	6.13603	5.82849	1.59375	6.03108	4.87465	5.6525	6.13603
DST	-0.989068	-1.44808	-1.81042	0.888156	-0.412402	-0.625307	-0.989068
DSTN	0.513606	-0.0067776	-3.31152	-0.207022	-0.837724	0.875779	0.513606
DTNA	1.63468	1.44447	1.72425	3.45073	0.113756	1.84437	1.63468
DTNBP1	2.72858	2.17859	1.04098	5.17204	0.808814	2.61593	2.72858
DTWD2	-4.36188	-3.37599	-2.29569	-5.37864	0.580551	-4.38421	-4.36188
DTX3L	-2.05402	-2.36419	-4.53518	-1.10803	-2.12326	-2.32267	-2.05402
DTYMK	3.13617	2.82362	3.8379	-0.380352	3.09702	2.15302	NA
DUS1L	3.07232	3.70204	0.885984	1.39263	3.33451	2.60308	3.07232
DUSP11	-1.72121	-1.20853	-2.94608	-2.11329	-1.59223	-1.9557	-1.72121
DUSP12	1.6133	1.61782	-1.69737	0.823459	3.13252	1.23893	1.6133
DUSP22	-1.21408	-2.80105	-2.76771	0.590569	-4.82701	-0.756588	-1.21408
DUSP23	-0.621533	0.340435	-2.02027	1.25605	1.40815	-0.730004	-0.621533
DUSP3	-2.84713	-1.77916	-3.06836	0.635161	-1.27077	-2.7424	-2.84713
DUT	-2.46274	-2.19486	0.958072	-3.37649	0.706499	-2.99093	NA
DVL2	0.790912	2.99874	4.88404	0.475953	5.88821	0.416678	0.790912
DVL3	2.9631	3.34488	1.00512	4.55686	9.56024	2.98761	2.9631
DYM	-2.21431	-1.16732	0.866356	-1.1804	-0.92505	-2.32407	-2.21431
DYNC1I2	-3.3431	-3.31365	-4.00492	-3.76077	-1.83792	-3.26632	-3.3431
DYNC1LI2	-1.71013	0.937525	0.549042	0.0437622	1.51331	-1.65421	-1.71013
DYNLL1	-1.1719	0.0792717	-1.19305	-2.90751	-0.193516	-1.42092	-1.1719
DYNLL2	5.25689	6.17097	4.63185	4.08166	5.76191	5.22648	5.25689
DYNLT1	-4.82403	-4.9437	-3.91903	-4.33081	-5.43664	-5.16401	-4.82403
DYRK1A	-2.80384	-1.43812	-0.186663	-0.670803	-0.817472	-2.6214	-2.80384
E2F4	-1.62607	1.47426	0.734324	0.710055	1.69267	-2.03624	-1.62607
EAF1	0.562666	-0.0293042	0.287059	-1.47977	-1.139	0.370895	0.562666
EAPP	-1.12971	-1.27956	-0.642609	-3.06799	2.6031	-1.12292	-1.12971
EBNA1BP2	0.712996	1.40498	2.13078	-1.22116	1.04487	-0.141261	0.712996
ECE1	-2.33698	-1.21592	0.136171	-0.834316	0.867173	-2.38182	-2.33698
ECH1	-0.147899	0.674721	-0.816299	0.99635	1.76507	-0.0963122	NA
ECHDC1	-4.66823	-5.50959	-4.41134	-4.19783	-4.84207	-4.64484	NA
ECHDC2	-2.4237	-1.60636	-1.03023	-1.68277	0.0584668	-1.98543	NA
ECHS1	-3.32156	-2.98064	-1.63141	-5.143	-1.72033	-3.62407	NA
ECI1	1.23644	0.986097	-0.136527	-2.16096	3.79909	1.00893	NA
ECI2	-3.47993	-3.89109	-4.54728	-6.41069	-2.915	-3.50532	NA
ECM1	-2.54182	-2.88828	-3.87874	-1.35819	-4.1206	-2.35856	-2.54182
ECT2	3.40216	3.45734	-0.557329	1.55122	5.48239	2.44716	3.40216
EDC3	0.600299	2.19762	5.40379	-0.746331	5.28947	0.42098	0.600299
EDEM3	-2.15071	-3.73582	-6.26806	-4.18315	-0.604179	-2.04962	-2.15071
EDF1	-2.64346	-2.90723	-2.06158	-4.84677	-3.66245	-2.77506	-2.64346
EEF1A1	-3.21915	-3.12535	-2.76932	-3.81963	-3.16482	-3.14888	-3.21915
EEF1B2	-2.61434	-2.035	-2.64836	-4.07081	-4.30173	-2.69744	-2.61434
EEF2	-3.26064	-1.91914	-1.36842	-2.9047	1.30138	-3.27113	-3.26064
EEPD1	4.4856	3.5853	1.68854	3.16437	4.08383	4.73779	4.4856
EFEMP1	-3.38049	-3.10939	-3.34822	2.46702	-3.92144	-3.08973	-3.38049
EFEMP2	-1.50701	-1.14276	-1.69111	2.44144	-1.67409	-1.19368	-1.50701
EFHD2	-4.65308	-4.0224	-3.05991	-1.23441	-4.93477	-5.2532	-4.65308
EFNB2	-0.182202	-0.588057	-1.22233	1.98264	-0.489641	0.063251	-0.182202
EFR3A	1.57851	-0.0446178	-3.93735	2.26155	1.07371	1.61592	1.57851
EGLN1	1.68569	1.47268	-0.115041	0.394432	2.56179	1.60603	1.68569
EHBP1	0.436582	0.651973	-1.90543	1.82312	1.26214	0.49948	0.436582
EHBP1L1	-2.7023	-2.91757	-2.90699	-0.447873	-4.62717	-2.67094	-2.7023
EHD2	-2.91328	-2.09187	-2.70964	0.385859	-2.59304	-2.51904	-2.91328
EHD3	-3.51015	-3.7336	-4.47667	-0.0383838	-3.69529	-3.30404	-3.51015
EHD4	-6.39724	-5.34553	-3.50792	-2.47431	-6.53902	-6.44207	-6.39724
EHHADH	1.85064	1.17693	-1.14531	2.113	2.82227	2.06324	NA
EHMT1	-0.174506	0.0780241	0.730696	0.493486	0.463577	-0.237742	-0.174506
EIF1	0.349482	2.44103	-0.629225	2.11411	3.34328	0.049753	0.349482
EIF1AD	3.44368	2.13145	2.91832	1.76879	4.27853	3.35796	3.44368
EIF2A	0.578777	0.406451	-2.05634	0.334419	0.855711	0.320526	0.578777
EIF2AK2	-0.518874	0.316003	-1.08764	1.00191	1.31334	-0.912381	-0.518874
EIF2B1	2.29379	3.84779	2.6719	1.58888	3.36212	1.89554	2.29379
EIF2B2	-3.43379	-2.88628	-2.12335	-3.98847	0.925144	-3.7103	-3.43379
EIF2B5	4.30938	4.15128	-0.199389	3.58708	7.16752	4.05511	4.30938
EIF2D	-0.259884	-1.37431	-3.27983	-2.48613	0.638349	-0.130854	-0.259884
EIF2S2	5.87005	5.03839	-0.0568588	4.07845	2.79297	5.38091	5.87005
EIF3J	-2.3595	-0.0563402	1.71166	-1.8216	0.883055	-3.16751	-2.3595
EIF3M	0.442014	-0.558517	0.391506	-1.39976	-1.16599	0.0497638	0.442014
EIF4A3	3.50345	3.6022	0.546574	2.98483	1.19574	2.94125	3.50345
EIF4B	-2.06836	-2.4641	-3.26962	-3.09235	-1.16303	-1.83387	-2.06836
EIF4E	-5.24094	-4.22527	-0.843918	-5.32949	-3.25895	-5.81727	-5.24094
EIF4E2	-2.46554	-2.65635	-2.09673	-2.1963	-4.76678	-2.59154	-2.46554
EIF4E3	-6.25648	-7.74213	-6.32908	-5.49672	-6.60343	-5.9586	-6.25648
EIF4EBP2	0.583408	2.01898	3.86168	1.27532	2.54737	0.93795	0.583408
EIF4ENIF1	-1.28487	1.85154	3.02131	0.524617	2.25692	-1.30523	-1.28487
EIF4H	0.105659	0.995065	-2.51603	0.438522	1.84935	-0.370047	0.105659
EIF5	-1.1287	-0.0799949	-0.314071	-2.10828	1.81924	-1.32953	-1.1287
EIF5A2	-0.0432464	1.17316	-1.56334	2.90324	2.2032	-0.0459586	-0.0432464
EIF5B	2.74382	3.66457	1.83144	1.88541	3.27405	2.16209	2.74382
ELAC2	-5.68052	-2.58661	1.10311	-4.22195	-1.76527	-6.22588	NA
ELF1	-3.40063	-2.90377	-5.00743	-0.642054	-7.4526	-3.06713	-3.40063
ELL	-1.28888	-0.87494	-2.46937	-0.388774	-1.4532	-1.22291	-1.28888
ELMO1	-4.71541	-5.79944	-4.39956	1.06608	-8.03746	-4.26656	-4.71541
ELMO2	5.01275	4.53818	-0.671241	5.97092	0.66949	5.21025	5.01275
ELMO3	0.117125	1.19477	1.45299	-1.24246	2.8963	0.0942639	0.117125
ELMOD2	-1.5685	-1.21367	0.95346	-2.94029	0.227076	-1.53159	-1.5685
ELMSAN1	-2.609	-0.57996	-1.10615	-1.9824	1.16274	-2.4852	-2.609
ELN	-1.59378	-2.48497	-2.0234	1.28117	-3.3825	-0.882872	-1.59378
ELOF1	0.944796	1.49522	-0.0536406	-1.91237	2.08179	0.811215	0.944796
ELOVL5	-0.28228	0.377015	-1.07556	-0.149166	-1.46492	-0.289599	-0.28228
ELP3	-5.18059	-4.57552	-1.05311	-5.29025	-2.25447	-5.12446	-5.18059
ELP4	-0.644521	-1.2917	-1.34848	-1.968	-0.269851	-0.79498	-0.644521
ELP6	-0.897719	-1.51063	-0.757038	-3.29584	-0.461629	-1.07422	-0.897719
EMB	-4.59491	-4.4486	-4.88286	0.524878	-6.15767	-4.29199	-4.59491
EMC1	-1.22259	0.749333	2.77406	-0.688365	2.17915	-1.48621	-1.22259
EMC10	0.614706	1.28049	0.857922	-0.211994	3.59455	0.56169	0.614706
EMC2	4.07656	1.93196	-3.95495	1.94434	1.74731	4.05095	NA
EMC4	-3.55142	-2.51091	1.52997	-3.11006	-2.54265	-3.81735	-3.55142
EMC7	-5.57544	-4.58819	-0.778518	-5.504	-2.57869	-5.87514	-5.57544
EMC8	-2.77012	0.501494	-1.81197	-0.072898	4.01598	-3.37819	-2.77012
EMILIN2	-4.68436	-5.14002	-4.33446	0.97615	-7.55883	-4.77361	-4.68436
EML1	-0.267684	-1.11999	0.0116744	1.77527	-1.16113	0.470534	-0.267684
EML2	-2.61423	-2.41361	-2.60028	-5.01786	0.0892897	-2.55684	-2.61423
ENAH	1.90531	1.17869	-0.342492	1.70536	0.872478	1.85988	1.90531
ENDOD1	-0.933108	-1.08691	-0.900411	-2.08924	-1.67069	-0.634947	-0.933108
ENDOG	-1.90624	-1.79792	-1.16885	-4.8421	0.262128	-2.30521	NA
ENG	-2.85043	-3.03139	-2.62741	2.50485	-4.25424	-2.49237	-2.85043
ENGASE	3.9664	4.74829	2.84071	3.90289	2.31238	4.45464	3.9664
ENO1	-1.58481	-0.460826	-0.870279	-0.980322	0.203051	-2.30072	-1.58481
ENO2	1.90782	2.04646	0.846455	0.46807	3.83337	1.53845	1.90782
ENOPH1	-2.30635	-0.467047	0.632098	-0.898464	2.13694	-2.69161	-2.30635
ENOSF1	-3.65794	-2.48763	-2.7532	-4.30248	1.54606	-3.58695	-3.65794
ENPEP	-0.521619	-1.36075	-0.105293	3.3206	-1.7577	-0.338528	-0.521619
ENPP4	-2.24706	-2.51059	-3.15168	-2.59346	-2.4534	-1.91583	-2.24706
ENSA	-1.87447	-1.4963	-3.39666	-1.8299	2.31061	-2.04791	-1.87447
ENTPD5	-1.86377	-1.27333	-1.04794	-3.44944	1.70749	-1.71298	-1.86377
ENY2	4.3075	2.50487	-0.863866	3.03627	3.04761	3.98168	4.3075
EOGT	-3.031	-4.09427	-2.8949	-1.80642	-6.7401	-2.74306	-3.031
EPB41	-1.09341	0.159973	1.7347	-0.789907	1.52925	-1.22483	-1.09341
EPB41L1	6.42458	5.91469	2.73812	5.21282	3.93622	6.94256	6.42458
EPB41L2	-4.15122	-4.04622	-3.83954	0.613542	-5.01062	-4.01294	-4.15122
EPB41L3	-5.50565	-5.37463	-5.08391	-0.923639	-6.04604	-5.44082	-5.50565
EPB41L5	1.90529	2.74999	1.54183	0.970103	2.59141	2.10239	1.90529
EPCAM	6.19679	7.10249	5.4966	4.24125	8.1993	5.89887	6.19679
EPHB2	1.97737	3.28256	2.82628	4.52487	0.976237	1.73249	1.97737
EPHB3	2.5299	2.13349	1.29273	0.627738	2.33864	2.67508	2.5299
EPHB4	2.02558	2.50552	-0.755115	1.68758	1.27383	1.96641	2.02558
EPHX2	-4.85583	-3.49557	-1.86375	-4.22644	-2.02823	-4.4749	NA
EPM2A	-1.35124	-2.16163	-0.87091	-0.47532	-1.32951	-1.01107	-1.35124
EPM2AIP1	3.61607	2.23523	3.72401	4.84056	0.839592	4.40331	3.61607
EPN1	2.58645	4.13648	2.3511	2.56898	3.19976	2.473	2.58645
EPN3	2.2644	2.10424	1.56433	-1.53965	1.38802	2.10212	2.2644
EPRS	0.557103	0.923942	-1.87805	0.113879	2.60422	0.0745854	0.557103
EPS15	-6.83055	-7.02441	-5.33539	-3.05228	-7.57572	-6.67283	-6.83055
EPS15L1	2.76812	3.69348	1.6377	1.75275	4.2208	2.78961	2.76812
EPS8	0.92557	0.365935	0.293364	0.8287	2.24877	1.27649	0.92557
EPS8L1	-2.20333	-1.68912	-2.38585	-3.60597	-0.910284	-2.09949	-2.20333
EPSTI1	-4.08401	-4.18599	-4.64751	1.66348	-7.03207	-4.44618	-4.08401
ERAL1	2.28232	3.91515	1.88275	1.97376	6.01665	1.64797	NA
ERAP1	-5.38218	-4.64883	-3.4572	-2.81843	-4.81977	-5.26686	-5.38218
ERAP2	-3.49803	-3.67702	-2.78553	-1.40724	-2.94183	-3.57543	-3.49803
ERBB2	1.19726	1.97622	0.563023	1.39696	3.91091	1.18354	1.19726
ERBB3	1.43816	2.08576	0.989437	0.324346	1.21874	1.69799	1.43816
ERC1	2.38982	3.49033	0.603816	3.49568	3.54034	2.49447	2.38982
ERCC2	0.587496	1.43383	1.05641	-1.13853	3.05204	0.291434	0.587496
ERCC3	1.40389	2.58266	1.55408	2.40633	3.70461	1.17089	1.40389
ERH	-1.73431	-0.195362	-0.206611	-2.1722	2.31929	-2.53332	-1.73431
ERI1	-6.19921	-4.02778	-2.67033	-4.08613	-2.44373	-7.27584	-6.19921
ERLEC1	-3.89333	-3.56357	-4.97675	-3.85459	-1.42237	-3.74434	-3.89333
ERLIN1	-4.04473	-2.34892	-0.389738	-4.51567	-1.89745	-4.46342	-4.04473
ERLIN2	0.329848	0.408859	-2.57481	-0.81719	2.62756	0.487776	0.329848
ERMP1	0.360175	1.4084	1.55072	-0.532967	2.31751	0.258752	0.360175
ERP29	-1.25368	-0.905617	-1.73085	-3.33677	2.02092	-1.54785	-1.25368
ERP44	-3.92704	-2.8869	-2.18536	-2.4168	-3.68948	-4.22827	-3.92704
ESAM	-2.77126	-4.01527	-2.78831	0.410495	-3.71555	-2.24968	-2.77126
ESD	-3.43049	-2.72543	-5.22465	-1.18805	-3.53487	-3.30544	-3.43049
ESF1	5.06635	5.21583	1.58661	3.41494	5.67917	4.68939	5.06635
ESPN	2.12975	2.6145	3.14843	0.876675	2.84601	2.23844	2.12975
ESRP2	2.82686	5.43362	5.0128	1.11509	5.16043	2.77723	2.82686
ESRRA	2.73485	0.854204	2.48673	-1.23883	1.57011	2.85043	2.73485
ESYT1	-0.705924	0.414599	-1.21258	0.790149	-1.15598	-0.898764	-0.705924
ESYT2	0.231267	0.0953256	-3.18223	-0.0245362	-0.516628	0.358047	0.231267
ETF1	-3.03632	-1.73307	-1.07971	-3.50656	-1.01251	-3.64546	-3.03632
ETFA	-2.76975	-1.67018	-0.16881	-4.16134	-0.431747	-3.15759	NA
ETFDH	-6.48244	-6.18334	-3.52013	-7.4893	-4.08511	-6.19039	NA
ETHE1	-3.03206	-1.92856	-3.15785	-4.60632	-2.52438	-3.24407	NA
ETNK1	-0.180188	-0.463779	-3.58998	-2.43257	2.47409	-0.154649	-0.180188
ETV6	1.20562	1.62299	-0.662299	2.54656	1.90686	1.09414	1.20562
EVA1B	-3.74239	-4.55129	-3.25076	-2.2271	-5.60629	-3.59757	-3.74239
EVPL	3.42417	3.62058	2.56779	0.967957	1.78344	3.4311	3.42417
EXD2	-0.350376	0.735563	1.86384	-2.81683	3.40792	-0.174814	-0.350376
EXOC1	-1.6597	-1.88386	0.766199	-0.0567766	-1.71969	-1.39268	-1.6597
EXOC5	-1.84853	-1.23959	-0.745932	-1.54824	1.11108	-2.23281	-1.84853
EXOC6	-3.72469	-3.34887	-1.97387	-3.67899	-0.870759	-3.69035	-3.72469
EXOC6B	0.635982	1.13322	-1.05234	0.613774	1.39738	0.991767	0.635982
EXOC7	1.09776	1.7391	-1.06845	0.344238	1.85995	1.13567	1.09776
EXOC8	3.21605	2.98233	-1.0947	2.7267	2.2301	3.51479	3.21605
EXOG	-1.26902	-2.29032	-1.58414	-1.80901	-1.92696	-1.19702	NA
EXOSC1	-3.30827	-2.7204	-0.434377	-2.53516	-2.10806	-3.4669	-3.30827
EXOSC2	-0.081923	0.118856	2.35627	-1.02609	-0.0621906	-0.924012	-0.081923
EXOSC5	3.56626	4.36783	3.18442	1.00478	3.8551	3.0985	3.56626
EXOSC8	0.419632	-0.430993	-0.841373	-0.56352	-1.62599	-0.100595	0.419632
EXOSC9	-5.22719	-4.12161	-1.76515	-4.29169	-2.36962	-6.75635	-5.22719
EXTL2	0.126076	-0.0963288	1.88421	-0.571168	1.05869	0.102899	0.126076
EZH2	4.88389	4.65617	3.55061	2.59559	4.98802	4.33121	4.88389
EZR	-2.70225	-2.47416	-1.65952	-1.99358	-2.64444	-2.70436	-2.70225
F13A1	-6.25825	-7.98136	-6.11041	-0.483795	-8.26094	-5.81794	-6.25825
F3	-5.46939	-5.35027	-5.01708	-5.23712	-4.07027	-5.51386	-5.46939
FABP5	-1.89121	-2.62093	-2.82022	-1.94459	-3.6839	-2.16138	-1.89121
FADD	2.28773	2.38794	-2.56135	2.13286	3.42039	1.78779	2.28773
FAF1	2.05499	2.86034	5.57639	1.59137	3.18365	1.59986	2.05499
FAF2	-0.0038649	1.5192	1.65875	0.980557	0.847929	-0.265033	-0.0038649
FAH	-1.35231	-0.475869	-0.360271	-1.39926	1.04524	-1.39292	-1.35231
FAHD1	0.825577	1.28477	-0.621932	-1.11577	1.15503	0.782232	NA
FAHD2A	1.89044	1.80146	0.32874	1.59431	4.80001	1.54112	NA
FAM107B	-5.44014	-5.56984	-5.56993	-4.42175	-5.09458	-5.29516	-5.44014
FAM114A1	-5.87558	-5.26705	-3.96624	-4.11923	-2.25531	-5.80739	-5.87558
FAM114A2	-6.22875	-6.32453	-6.02563	-5.16776	-5.10154	-5.98127	-6.22875
FAM118B	-4.02839	-2.39468	-3.50358	-3.81761	-1.73636	-4.1562	-4.02839
FAM120A	-2.85256	-2.01464	-0.950767	-3.63707	-0.863965	-2.90398	-2.85256
FAM120B	-1.10142	-0.748077	1.0366	-0.058329	-0.866664	-0.619279	-1.10142
FAM126A	-1.82054	-2.62373	-3.9374	2.17454	-2.33486	-1.718	-1.82054
FAM136A	3.31532	4.01301	1.46913	2.00593	6.48445	2.58671	NA
FAM160A2	-1.89128	-1.39036	0.271409	-2.74105	0.141705	-1.30981	-1.89128
FAM160B2	-2.40622	-0.15741	1.12007	-1.16309	0.863591	-2.16054	-2.40622
FAM162A	0.638954	0.126864	-1.35568	-3.77058	2.29193	0.290298	NA
FAM168A	1.78349	2.49773	0.0575122	3.67368	3.47043	2.01168	1.78349
FAM169A	-0.953323	-0.357067	-0.214915	-1.59345	2.21304	-1.08508	-0.953323
FAM192A	0.849149	3.36613	4.22296	1.96904	2.34416	0.685672	0.849149
FAM207A	-1.23342	-0.381226	0.187313	-1.46705	0.183528	-1.98986	-1.23342
FAM20B	2.515	2.8543	0.144746	2.04037	5.58221	2.38559	2.515
FAM210A	-0.949748	0.254786	1.49224	-1.58002	0.794865	-1.77203	NA
FAM210B	5.6712	3.98084	-0.0215464	2.02704	3.50447	6.42615	NA
FAM32A	1.55619	1.07898	-0.38239	1.102	-0.174281	1.34351	1.55619
FAM3C	-0.39423	-0.545844	-3.05129	0.335938	0.560674	-0.478647	-0.39423
FAM49A	-5.98444	-5.79479	-6.29822	1.9007	-6.87289	-5.6558	-5.98444
FAM76B	-1.73719	-1.55446	-1.96897	-2.12272	-1.35575	-1.71831	-1.73719
FAM83B	-1.37701	-1.82074	-2.11332	-1.74674	-2.38816	-1.70705	-1.37701
FAM8A1	-2.43356	-3.14311	-3.42389	-2.35871	-2.09691	-1.93412	-2.43356
FAM98A	-0.909682	-0.976814	-1.9552	-0.7363	0.713419	-1.33693	-0.909682
FAM98B	-3.34439	-1.5302	0.828232	-2.15914	1.51875	-4.00707	-3.34439
FAM98C	-0.400771	-0.630924	-1.2707	-1.45925	1.0792	-0.308253	-0.400771
FANCI	2.41815	3.6671	4.05683	2.41152	3.80157	1.0819	2.41815
FAP	-5.11678	-4.67291	-5.05852	1.76153	-3.25967	-5.19601	-5.11678
FAR1	-1.51266	-0.962287	-1.49503	-2.05511	0.591846	-1.74525	-1.51266
FARP2	-0.533605	0.486294	-0.0848081	-0.900515	0.310018	-0.436285	-0.533605
FARS2	-0.278685	-1.955	-2.48542	-1.9688	-0.454924	-0.330707	NA
FARSB	1.93515	2.50672	2.55841	-0.445414	2.30818	1.25618	1.93515
FASN	5.25827	4.81316	4.39649	3.56663	5.54882	4.97088	NA
FASTKD1	0.955859	0.965094	0.711652	-1.71861	2.97882	0.441172	NA
FASTKD2	-1.79469	-0.158277	-2.14484	-2.91289	-1.17278	-2.09531	NA
FAT1	0.126391	0.0488004	1.71254	1.39617	-1.26987	0.0480377	0.126391
FAU	-2.79597	-1.6054	-2.89005	-2.48476	-1.78148	-2.95518	-2.79597
FBL	0.308962	2.42053	0.18585	3.97635	4.96331	-0.211134	0.308962
FBLN2	-3.85477	-3.39811	-3.79638	2.60231	-4.2936	-3.54107	-3.85477
FBLN5	-3.76437	-4.37791	-3.57353	0.719078	-5.22271	-3.16197	-3.76437
FBP1	-4.90708	-4.91719	-3.95543	-3.20551	-3.76652	-4.54333	-4.90708
FBXL12	1.45638	2.81217	1.20678	0.942686	0.704598	1.65216	1.45638
FBXL18	5.7358	6.55252	3.36193	4.40193	7.74994	5.57885	5.7358
FBXL20	0.676402	1.94885	0.282923	1.23766	4.5363	0.797529	0.676402
FBXO21	0.929873	2.22162	0.620025	-0.346437	3.20435	1.01252	0.929873
FBXO28	-0.122506	-0.215811	-3.75252	-1.71565	1.41398	-0.289965	-0.122506
FBXO3	-3.03555	-3.64068	-4.22106	-3.76728	-2.69083	-2.68223	-3.03555
FBXO30	-0.926041	-0.666414	-0.224365	1.23601	0.144422	-1.02767	-0.926041
FBXO4	-0.591825	-0.768752	-3.80662	-1.3655	1.04504	-0.673043	-0.591825
FBXO45	4.2573	4.48518	2.05975	2.77071	4.79669	3.60734	4.2573
FBXO6	-5.37792	-5.37399	-3.68714	-3.92147	-4.25651	-5.88846	-5.37792
FBXO7	-4.55157	-2.7067	-1.19239	-2.62053	-1.90568	-4.7246	-4.55157
FCF1	-1.29899	0.394845	0.679107	-0.817218	2.55351	-1.65445	-1.29899
FCGBP	-4.71741	-5.21519	-4.86039	-4.12421	-3.00809	-4.40213	-4.71741
FCGR2B	-6.10953	-6.05018	-5.80309	-0.693093	-7.77168	-6.18103	-6.10953
FCGRT	-0.54055	0.353361	-0.416942	2.75366	-5.28371	-0.209695	-0.54055
FCHO2	-6.50265	-5.66598	-4.59021	-4.31389	-5.36391	-6.1881	-6.50265
FCHSD1	-3.0411	-2.25981	-2.50508	-0.27883	-4.28445	-2.81868	-3.0411
FDFT1	-2.35994	0.0134764	-0.101247	-2.90958	0.0418131	-2.54496	-2.35994
FDPS	1.32432	0.511843	-0.93771	-0.884631	1.93726	0.808952	NA
FDX1	-1.21708	-1.01149	0.108076	-2.66845	0.147584	-1.06113	NA
FDXR	-1.93708	-2.33949	-3.48165	-3.82119	-0.106774	-2.11024	NA
FECH	-4.92213	-3.01412	-0.110126	-2.84025	-0.511221	-5.24188	NA
FER	-1.12162	-1.01209	-0.150999	-0.416689	-2.06274	-1.00314	-1.12162
FERMT2	-1.25415	-1.27512	-0.706033	3.28122	-1.34242	-0.843793	-1.25415
FERMT3	-8.08264	-7.99096	-8.08438	-1.98343	-9.32697	-8.24818	-8.08264
FES	-5.85518	-6.51147	-5.1733	-0.466695	-6.64294	-5.61638	-5.85518
FEZ2	-3.41131	-3.54134	-5.14463	-0.953359	-2.04234	-3.35702	-3.41131
FGD3	-5.68017	-6.15456	-5.31503	-2.84211	-8.07814	-5.45669	-5.68017
FGD4	-1.73083	-1.74814	-3.1582	-3.16268	0.824965	-1.3856	-1.73083
FGFR1OP	-1.40209	-1.3834	-0.557645	-1.87653	-2.48861	-1.42393	-1.40209
FGFR1OP2	-1.78431	-2.33145	-5.74524	-0.708106	-0.863656	-1.86708	-1.78431
FGL2	-8.92255	-8.89323	-8.69614	-1.453	-9.11684	-8.65045	-8.92255
FH	1.33019	0.878362	-1.6359	-1.86991	2.8805	0.858688	NA
FHL2	-3.92387	-3.5919	-4.07927	-3.89577	-2.53977	-3.90793	-3.92387
FHL3	-3.48481	-2.54711	-3.15524	1.80524	-3.41895	-3.45532	-3.48481
FHOD1	-4.38784	-3.09767	-3.38634	-1.96946	-3.11977	-4.36895	-4.38784
FIBP	1.70897	1.8787	0.975511	0.152798	4.1162	1.3103	1.70897
FILIP1L	-4.02445	-4.3428	-4.36879	2.19269	-4.58193	-3.63616	-4.02445
FIP1L1	-0.478705	-0.528399	3.11193	-0.00366473	-1.52188	-0.856198	-0.478705
FKBP10	0.215328	0.986017	-0.012983	2.25606	1.10607	-0.00611678	NA
FKBP15	-4.88023	-4.87631	-3.74896	-2.67426	-6.30785	-4.91275	-4.88023
FKBP2	-3.55056	-3.59028	-3.96132	-5.04796	-0.797555	-3.4447	-3.55056
FKBP3	-0.0914477	1.25584	0.406979	-0.843741	3.58264	-0.834271	-0.0914477
FKBP4	2.63587	3.29884	1.06054	0.872283	6.06813	2.11979	2.63587
FKBP7	-1.87376	-2.7782	-2.24333	1.42632	-1.41608	-1.38676	-1.87376
FKBP8	-1.78636	-1.67329	-3.22395	-1.92162	-0.796471	-1.70904	NA
FKBP9	4.36645	5.12729	1.66134	6.14676	6.22884	4.40729	4.36645
FLAD1	3.13932	3.9895	0.693265	1.8246	6.04612	2.65323	NA
FLII	-6.43519	-4.63027	-3.26104	-3.12504	-3.08065	-6.44042	-6.43519
FLNB	0.102296	0.539116	0.388938	-1.46693	1.33463	0.309718	0.102296
FLNC	-3.62151	-3.11352	-3.86983	0.340502	-2.76434	-3.67738	-3.62151
FLYWCH2	1.91128	2.40544	0.357807	0.541495	3.68016	1.90057	1.91128
FMN1	-3.31183	-3.34309	-1.91197	-3.18445	-2.90758	-2.94142	-3.31183
FMNL3	-2.18168	-2.08919	-2.54361	3.28195	-4.347	-1.85732	-2.18168
FMOD	-2.71545	-3.2383	-3.43337	-2.1746	-2.98182	-2.28095	-2.71545
FN1	-0.77182	0.0605573	-0.774993	4.24337	-0.508434	-0.966476	-0.77182
FN3K	3.46902	4.29525	2.61706	1.61125	4.72627	3.64897	3.46902
FN3KRP	2.51008	3.01762	0.855627	1.39617	2.22174	2.07373	2.51008
FNBP1	-1.21549	-1.65573	-0.41313	4.35192	-2.38968	-1.04679	-1.21549
FNBP1L	0.96852	2.55634	2.15005	0.444321	2.76448	0.985044	0.96852
FNBP4	-1.10103	0.0402001	-0.70021	1.52694	-0.45902	-1.04495	-1.10103
FNDC1	-0.991477	-1.42731	-0.863418	2.97429	-1.35689	-0.866553	-0.991477
FNDC3A	-5.72168	-5.14747	-7.36716	-4.07223	-6.18251	-5.29128	-5.72168
FNDC3B	0.810865	0.41808	-1.82491	2.905	0.552756	0.848361	0.810865
FNTA	1.10372	1.73907	-1.02469	1.83326	1.37054	0.888772	1.10372
FOCAD	-2.51505	-2.7038	-0.757327	-3.06593	-1.86188	-2.19213	-2.51505
FOXK1	5.13415	6.52495	3.16297	5.03926	7.42738	5.10904	5.13415
FOXK2	5.94996	5.94076	4.55238	3.67058	5.50796	5.54721	5.94996
FOXP1	-4.73571	-5.86816	-4.85571	-4.82242	-4.07524	-4.37204	-4.73571
FOXP4	4.65673	5.52305	3.74528	4.49362	8.37559	4.65637	4.65673
FOXRED1	-1.66724	-0.236228	-0.206338	-2.57901	3.33194	-2.06892	NA
FPGS	-2.1793	-2.21954	-1.43827	-3.01726	-1.0623	-2.45051	NA
FRA10AC1	-3.13693	-2.41355	0.279257	-4.03814	-1.59936	-3.15963	-3.13693
FRG1	-2.4951	-2.3341	0.901828	-1.68913	-2.62973	-2.55993	-2.4951
FRK	0.467886	1.06818	1.28737	-0.69149	4.53817	0.295953	0.467886
FRMD8	-0.620454	-0.580883	-1.283	-0.0835889	-0.267786	-0.756202	-0.620454
FRYL	-3.97726	-4.20651	-2.46561	-3.22873	-7.68347	-3.86344	-3.97726
FSCN1	-2.48145	-1.78405	-3.52104	0.0842275	0.109906	-2.98134	-2.48145
FTH1	-0.2932	0.359106	-0.212454	1.32141	-0.615638	-0.360665	NA
FTL	-0.413203	0.804043	-0.326703	3.84127	-0.452749	-0.670501	-0.413203
FTSJ3	0.118298	0.684832	-2.00134	1.77266	0.382759	-0.190943	0.118298
FUBP1	-2.86555	-2.05065	-1.11901	-2.32	0.0159487	-3.32866	-2.86555
FUCA1	-6.49061	-5.91175	-3.81723	-3.11537	-5.07455	-6.14583	-6.49061
FUCA2	-0.779497	0.0199039	-0.229108	1.40655	-2.61766	-1.20081	-0.779497
FUS	1.96179	3.18239	0.774763	3.68824	5.1259	1.80663	1.96179
FUT8	-3.92013	-2.02913	-3.47623	-2.03103	-0.816274	-4.13503	-3.92013
FXN	-0.790246	-0.978553	0.341124	-1.14211	2.83882	-1.07806	NA
FXR2	-3.50889	-1.07057	1.1128	-3.81156	1.12367	-3.84709	-3.50889
FYCO1	-0.671438	-1.50267	-1.01305	-1.49005	-2.29927	0.175462	-0.671438
FYTTD1	-0.808611	-0.156497	-3.72908	1.42668	2.05981	-1.01077	-0.808611
G3BP2	-5.01584	-3.74441	-1.2976	-3.65468	-1.3333	-5.36356	-5.01584
GAA	1.7774	2.76807	0.974796	3.57127	3.83742	1.75206	1.7774
GAB1	-3.0473	-2.84157	-0.699808	-0.598317	-4.87209	-2.47152	-3.0473
GABARAPL2	-2.18619	-1.71801	-1.20169	-0.722865	-1.76277	-1.74373	-2.18619
GABPB1	-1.69451	0.0779008	-1.14596	0.648918	1.26222	-2.28045	-1.69451
GADD45GIP1	0.522945	0.333263	-0.585313	-2.05282	1.19917	-0.00726358	NA
GAK	-1.75413	-0.990198	1.46133	-2.70094	-1.64384	-1.68764	-1.75413
GALC	-1.61248	-1.27154	-0.819804	1.9404	-0.415567	-1.15858	-1.61248
GALE	-2.19398	-1.35233	0.854866	-4.38208	-1.21435	-2.54597	-2.19398
GALK1	-1.93574	-1.02292	-3.18288	-1.25397	-0.56535	-2.64256	-1.93574
GALK2	-3.88638	-3.20406	-2.30765	-3.26712	-1.40076	-4.0022	-3.88638
GALM	-2.79301	-3.26521	-2.9546	-0.880574	-3.90197	-2.88888	-2.79301
GALNS	1.34464	2.6881	3.1527	2.16286	1.78908	1.25955	1.34464
GALNT1	-5.20461	-4.64696	-3.10788	-3.70379	-2.32956	-5.60571	-5.20461
GALNT10	-1.40533	-1.72455	-0.859937	-1.97543	-0.816977	-0.948961	-1.40533
GALNT2	1.76402	1.73821	-0.162853	0.741155	2.58502	1.67581	1.76402
GALNT6	-1.0449	-0.719852	-1.26537	-1.03686	-0.655051	-1.22897	-1.0449
GALNT7	-5.26035	-5.29536	-2.55323	-7.31066	-0.0439149	-5.22743	-5.26035
GAN	0.767846	2.11048	2.36418	0.432548	3.87117	0.50642	0.767846
GANAB	0.234099	2.29206	0.11915	1.33887	5.84234	-0.098283	0.234099
GAPDH	2.34746	2.3553	-0.168138	-0.42146	4.18728	1.57066	NA
GAPVD1	-2.687	-1.66079	-0.923473	-1.41508	-1.96925	-2.64893	-2.687
GAR1	-0.986718	1.01369	1.70457	-0.125685	0.678843	-1.57135	-0.986718
GARS	5.48341	5.29119	1.82485	4.40901	5.09573	4.99567	NA
GART	-1.41734	0.0389627	1.58734	-1.50343	-0.0390862	-2.27968	-1.41734
GATAD2A	2.99165	3.37022	2.17942	2.48945	4.29538	2.79441	2.99165
GATAD2B	3.47175	4.23949	1.04188	2.87308	5.71899	3.58009	3.47175
GATM	-2.28903	-2.77676	-0.986778	-0.237799	-2.76386	-1.89848	NA
GBA2	-1.08157	-0.497509	-1.4048	-3.46351	-0.161961	-0.925346	-1.08157
GBF1	-2.32801	-0.565654	0.206352	-1.26063	-0.199169	-2.08855	-2.32801
GCC1	2.93685	3.21868	-0.940249	1.71716	3.09396	2.83491	2.93685
GCDH	4.35627	4.74474	3.43099	0.96856	4.72035	4.26882	NA
GCFC2	0.972917	0.97312	-1.47899	0.112021	4.43039	0.690556	0.972917
GCHFR	-3.68771	-2.59941	-1.87137	-3.35995	-0.309741	-4.20898	-3.68771
GCLC	0.658586	0.945495	-0.791508	0.608419	0.747112	0.483457	0.658586
GCLM	0.93201	2.01147	2.05857	1.94669	2.23921	0.572469	0.93201
GDAP1	2.27537	1.60303	0.607052	0.504622	3.77885	2.33263	NA
GDAP2	-1.38367	-0.997115	-0.68934	-0.780322	0.305181	-1.44156	-1.38367
GDE1	0.621849	1.16705	-1.74747	-1.63132	3.02793	0.800288	0.621849
GDF15	0.717701	0.91709	0.491872	0.113801	0.467365	0.823158	0.717701
GEMIN2	0.85501	1.56131	1.25443	-0.85727	5.09066	0.0593236	0.85501
GEMIN4	-1.88357	0.117796	2.01883	-1.39074	1.72435	-2.33024	-1.88357
GEMIN5	1.26485	3.58963	3.12568	2.23543	1.573	0.690344	1.26485
GEMIN6	2.41261	3.30741	1.81702	2.16901	3.55789	1.72117	2.41261
GEMIN7	-1.24292	-0.49458	-0.981	-1.6307	0.464437	-1.88885	-1.24292
GET4	4.27533	6.01015	1.812	4.74027	6.8366	4.17172	4.27533
GFER	2.68135	2.8063	0.665399	0.138004	3.56761	2.43614	NA
GFM1	2.68626	3.7589	0.057637	1.509	5.04748	2.31193	NA
GFM2	-2.61365	0.0813591	-0.182221	-3.8675	0.0535178	-2.87924	NA
GFPT2	-3.32826	-1.97925	-3.11397	2.10101	-1.85486	-3.38063	-3.32826
GGA1	-2.24392	-1.38295	-0.125219	-2.56461	1.321	-2.29397	-2.24392
GGA3	1.93028	3.27601	0.593692	3.70139	3.3096	1.94272	1.93028
GGACT	-4.20085	-3.75196	-5.33181	-2.9555	-2.09699	-4.19816	-4.20085
GGCX	2.6032	0.34828	1.50733	1.67197	2.4798	2.75568	2.6032
GGPS1	1.70566	0.947527	-0.841395	-1.10438	2.36851	1.76483	1.70566
GGT5	-4.18591	-4.4849	-4.06678	1.63379	-4.33891	-3.71871	-4.18591
GHDC	-2.73345	-1.88794	-3.17537	-1.38186	-2.00202	-2.29505	-2.73345
GID8	13.6159	11.6295	4.87076	8.22144	6.78559	13.5697	13.6159
GIMAP4	-9.47123	-11.1912	-9.51157	-1.69911	-12.0749	-9.35181	-9.47123
GINS4	4.32434	4.55687	1.90555	2.8277	5.25292	3.61042	4.32434
GIPC1	1.84884	1.6456	0.497464	-1.06223	1.13838	1.77558	1.84884
GIPC2	-2.77603	-4.31398	-2.16187	-1.59613	-3.12442	-2.47661	-2.77603
GIT1	2.61569	4.40068	3.37931	3.47134	4.73204	2.17982	2.61569
GIT2	-4.76052	-3.69888	-5.52352	1.98047	-3.38275	-4.54531	-4.76052
GLCE	-2.79323	-1.53444	-1.07118	-3.95962	-0.863762	-2.60156	-2.79323
GLE1	-0.587941	-0.0339222	0.611872	-1.3814	-0.90519	-1.00767	-0.587941
GLG1	-0.402324	0.757581	0.576342	1.58582	2.38974	-0.296977	-0.402324
GLIPR1	-6.17181	-6.56468	-6.63769	1.32393	-8.72961	-6.01966	-6.17181
GLIPR2	-3.53768	-5.09452	-3.39	1.15316	-6.96107	-3.52004	-3.53768
GLMN	-1.52354	-1.39543	1.45727	-2.78859	-1.61489	-2.2988	-1.52354
GLO1	-0.28371	-0.420469	-1.10396	-1.66202	-0.351689	-0.871651	-0.28371
GLRX	-6.96666	-6.87443	-5.65975	-5.30049	-5.08137	-7.14372	-6.96666
GLRX3	-0.111431	-0.169917	3.66264	-1.80615	1.15035	-0.795226	-0.111431
GLRX5	2.17544	3.19957	3.51316	-0.505674	5.50182	1.66954	NA
GLS	-1.83633	-0.117416	-1.977	3.08632	-1.3984	-1.90077	NA
GLT8D1	0.762774	-3.41776	1.15968	-3.92584	-1.66737	1.0663	0.762774
GLTP	0.53588	1.51034	0.110939	-2.37133	3.17777	0.632492	0.53588
GLUD1	-2.90348	-2.26228	-0.768992	-4.13387	-1.44712	-2.99579	NA
GLUL	-3.10343	-3.88713	-4.99284	-2.05771	-2.13715	-2.91436	-3.10343
GM2A	-5.29242	-5.15147	-4.95359	-2.16621	-5.89473	-5.38701	-5.29242
GMDS	-2.35606	-2.39001	-3.22678	-3.72585	-0.777178	-2.709	-2.35606
GMEB2	10.2708	9.34803	2.76049	6.6344	6.68111	10.1078	10.2708
GMFB	-3.4446	-2.60631	-3.01672	-3.22872	-1.30065	-3.75651	-3.4446
GMFG	-8.35017	-8.43928	-8.23361	-1.83182	-12.5457	-8.35008	-8.35017
GMIP	-4.74429	-4.50129	-5.39149	-0.469487	-6.39242	-4.75091	-4.74429
GMPPA	-1.25744	-1.50511	-1.38566	-2.81936	-1.68337	-1.50312	-1.25744
GMPR	-0.282039	-0.587478	-0.669934	-0.799322	-0.118099	-0.112308	-0.282039
GMPR2	-4.29794	-3.01158	-4.24341	-3.79226	-1.19421	-4.23079	-4.29794
GMPS	6.33121	6.98	2.69323	4.8189	7.85065	5.90226	6.33121
GNA11	0.548331	2.21125	2.57216	-1.18111	4.57189	0.45808	0.548331
GNA13	-0.963034	-0.861858	-2.99425	2.45923	-2.54009	-1.33508	-0.963034
GNAI2	-5.67527	-5.59053	-5.92944	-3.07857	-10.8841	-5.52598	-5.67527
GNAI3	-2.9129	-2.68286	-0.917016	-2.52125	-4.05122	-3.53916	-2.9129
GNAQ	-5.58094	-5.34611	-4.01444	-5.54645	-4.04408	-5.2794	-5.58094
GNAS	4.2088	5.15124	1.22395	6.8568	5.65133	4.15827	4.2088
GNB1	-3.31973	-2.0599	-0.938021	-1.56619	-1.11599	-3.64472	-3.31973
GNB4	-2.57866	-2.72763	-3.59681	3.86862	-3.6937	-2.8093	-2.57866
GNE	-4.04643	-4.37357	-3.8488	-2.7861	-2.04124	-3.91063	-4.04643
GNG12	-5.83876	-5.65571	-4.73992	-4.97517	-4.91721	-5.55097	-5.83876
GNG2	-7.17229	-8.39532	-7.16122	-0.577124	-10.9686	-6.9139	-7.17229
GNL2	-1.04567	-0.321961	-0.387278	-0.868053	2.46641	-1.63132	-1.04567
GNPAT	3.3083	1.77252	-1.68265	0.933279	0.994013	3.33981	3.3083
GNPDA1	1.18375	1.5611	2.08948	1.33323	-0.539224	0.908016	1.18375
GNPDA2	-5.37825	-5.71796	-3.04298	-4.47468	-3.82951	-5.20226	-5.37825
GNPNAT1	-2.59693	-1.89262	-1.58174	-5.29642	1.66185	-3.61285	-2.59693
GNPTAB	-2.18433	-1.07	-2.61841	0.678763	0.504102	-2.22124	-2.18433
GNPTG	-1.01555	-1.15182	-3.63206	-1.39212	-2.08419	-0.521099	-1.01555
GNS	-1.44121	-0.700498	-3.04906	0.860364	-1.18311	-1.21572	-1.44121
GOLGA2	-1.53726	-0.675751	-0.636954	-2.12938	-0.140213	-1.33815	-1.53726
GOLGA4	-0.725961	-1.4187	-0.749538	-3.74597	-0.503249	-0.617981	-0.725961
GOLGA5	-2.95335	-2.52557	-1.8569	-4.02147	0.239667	-3.06918	-2.95335
GOLGA7	1.84266	1.1215	-2.32864	1.52035	0.700471	1.71147	1.84266
GOLGB1	-2.17163	-2.37842	-4.11884	-2.68936	-0.28773	-1.7865	-2.17163
GOLIM4	0.868687	0.794936	-1.3476	1.56197	0.88102	1.03507	0.868687
GOLM1	-4.48408	-3.48738	-3.62338	-5.92279	-0.75338	-4.50614	-4.48408
GOLPH3	1.32523	2.46198	-1.01131	1.67735	4.88481	1.20622	NA
GOLPH3L	1.19362	1.07987	-1.56408	-1.30832	2.05413	1.24002	1.19362
GOLT1B	0.441128	0.348352	-3.14834	-0.106944	2.44323	-0.0768154	0.441128
GOPC	-3.28578	-2.7323	-2.39787	-0.582108	-3.93635	-3.07009	-3.28578
GORAB	0.638164	0.48505	-3.68458	0.053584	1.71277	0.620005	0.638164
GORASP1	-0.920537	-3.08926	-1.42351	-4.95809	-3.10974	-0.36975	-0.920537
GORASP2	2.22481	2.52646	1.65678	0.461304	2.76198	1.91313	2.22481
GOSR1	1.55184	3.07644	2.15271	1.42517	6.08377	1.42412	1.55184
GOSR2	0.477046	1.56637	0.181923	2.39904	2.40837	0.361553	0.477046
GOT1	-0.685976	0.664823	1.58563	-2.27833	2.2877	-1.03853	-0.685976
GOT2	0.564676	2.66318	2.82368	-1.24999	3.48511	0.102402	NA
GPAA1	5.72498	5.22087	1.07652	4.08444	6.76723	5.5021	5.72498
GPATCH1	4.9017	5.33424	3.55704	4.21994	5.38713	4.68206	4.9017
GPATCH11	2.03352	-0.391491	1.60923	-0.358796	0.271717	2.04477	2.03352
GPATCH4	3.60074	3.17981	-0.204774	0.732203	2.27825	3.16504	3.60074
GPATCH8	1.74448	3.50909	1.98182	3.48017	5.09403	1.85943	1.74448
GPC1	2.57174	2.78124	2.75755	1.24719	3.25198	2.653	2.57174
GPC6	-1.48945	-1.34666	-1.77414	2.64798	-1.88328	-1.54427	-1.48945
GPCPD1	-0.796993	-1.24172	-2.79815	-0.92422	-2.37318	-0.408526	-0.796993
GPD1	-1.51556	-2.60927	-1.63695	-0.453736	-2.4349	-1.13412	-1.51556
GPD1L	-0.0358679	-0.169212	-0.110834	-2.51032	-0.318626	0.748231	-0.0358679
GPD2	-0.53897	-1.01905	-1.22451	-3.30353	2.8215	-0.936025	NA
GPHN	-0.0794744	0.737598	1.1835	-1.39706	4.1729	-0.0479286	-0.0794744
GPI	1.14292	1.90912	0.025807	1.64807	5.23146	0.677285	NA
GPN1	-0.707964	0.74942	-1.78098	1.49653	2.56413	-1.21632	-0.707964
GPNMB	-0.643233	0.0901242	-0.818245	3.69065	1.60968	-0.649438	-0.643233
GPR107	-0.64192	0.245449	1.67384	-0.300613	1.24765	-0.75065	-0.64192
GPR108	-2.0869	-1.29198	-1.56995	-2.85592	-1.9269	-1.87199	-2.0869
GPRC5C	-0.707247	-0.0996619	-1.42682	-2.09961	0.79189	-0.328158	-0.707247
GPRIN3	-4.79025	-5.38209	-4.18521	-2.11712	-7.29836	-4.59513	-4.79025
GPS1	2.94716	2.93613	0.382843	1.72702	1.91494	2.54044	2.94716
GPS2	-3.0432	-0.976597	0.0277282	-2.84471	-1.60137	-3.19144	-3.0432
GPX7	-2.33142	-1.90562	-1.46878	1.87101	-2.16485	-2.34376	-2.33142
GPX8	-3.9241	-4.05927	-3.71	-1.14688	-3.25263	-4.01143	-3.9241
GRAMD4	-0.488628	1.1314	1.98328	-1.52296	2.42911	-0.604728	-0.488628
GRB2	-2.53426	-2.65163	-4.56495	-1.15031	-2.25184	-3.03758	-2.53426
GRB7	1.38088	2.30515	1.16588	1.12861	4.13529	1.29882	1.38088
GREM1	-2.23079	-1.67754	-1.98998	2.87204	-2.36465	-2.48341	-2.23079
GRHL2	7.11121	7.60124	3.94312	2.2911	7.87502	7.01711	7.11121
GRHPR	-3.16367	-3.20609	-3.0741	-4.52962	-3.64597	-3.21224	NA
GRK5	-5.98295	-6.77269	-4.47724	-1.5668	-5.97923	-5.73239	-5.98295
GRK6	-2.39269	-1.53303	-2.20506	-1.09017	-2.31211	-3.06487	-2.39269
GRN	-1.90715	-0.480192	-1.97764	2.13429	-2.09014	-1.85164	-1.90715
GRPEL1	-3.87287	-2.77224	-0.0239197	-5.66129	-2.75313	-4.66425	NA
GRSF1	-3.30878	-1.81456	-0.379872	-2.44817	-0.974957	-3.74658	NA
GRWD1	-1.56326	0.267438	-1.02873	-1.19715	1.43391	-2.35155	-1.56326
GSDMD	-1.56718	-2.48169	-5.09803	-1.02566	-2.75223	-1.76171	-1.56718
GSK3A	2.11081	3.92052	1.88386	1.81429	5.12854	1.72565	2.11081
GSK3B	3.84109	4.44858	1.92366	2.67573	3.8464	3.84126	3.84109
GSKIP	-5.05786	-4.79702	-5.14953	-7.43112	-0.62323	-5.67544	-5.05786
GSN	-4.45417	-5.00807	-3.58557	-0.848063	-5.27282	-3.9342	-4.45417
GSPT1	1.99729	1.97539	0.662746	0.514794	3.2683	1.80041	1.99729
GSR	-4.33312	-2.64649	-1.28502	-4.53687	0.995765	-4.73632	NA
GSS	5.14351	3.62095	-0.656729	1.36495	2.82987	4.84345	5.14351
GSTCD	-2.05671	-1.17755	1.09487	-2.81595	1.25555	-2.79367	-2.05671
GSTK1	-3.10928	-4.21696	-6.00867	-4.32137	-5.01267	-2.94702	NA
GSTM3	0.401471	0.514324	0.577287	1.27217	1.80988	0.424701	0.401471
GSTO1	-4.62445	-4.43142	-2.8869	-4.20206	-4.68748	-5.20631	NA
GSTP1	-2.104	-1.38626	-2.34632	-0.886308	0.777631	-2.1588	-2.104
GSTZ1	-4.52713	-3.91936	-3.47044	-6.81605	2.04816	-4.61586	NA
GTF2A1	-0.644997	-0.281741	0.519435	-0.593258	2.62728	-0.915569	-0.644997
GTF2B	-5.35062	-5.88511	-3.52466	-5.13836	-5.93529	-5.44795	-5.35062
GTF2E1	1.53019	1.15677	-0.504035	1.59708	1.14621	1.26975	1.53019
GTF2E2	-4.23387	-3.04272	-0.581507	-4.07148	-1.39959	-4.77924	-4.23387
GTF2F2	0.132781	1.5283	-0.81252	1.22633	-1.10457	-0.0688901	0.132781
GTF2H1	-2.97907	-3.18387	-1.93083	-2.93118	-2.77106	-3.17763	-2.97907
GTF2H5	0.426102	-1.58477	0.862493	-1.14187	-1.18434	0.624923	0.426102
GTF2I	3.36356	5.01181	0.76595	3.21208	4.51534	3.54266	3.36356
GTF3C1	2.93308	3.49421	1.23704	2.96058	3.21515	3.09249	2.93308
GTF3C2	2.29443	2.75048	1.69842	1.81136	8.53134	2.01232	2.29443
GTF3C3	2.28281	2.74713	2.17981	1.50741	3.22416	1.82578	2.28281
GTF3C4	1.54706	2.14495	4.26156	0.028106	2.95878	1.18037	1.54706
GTF3C5	0.473461	0.993967	1.8512	0.54521	1.69216	0.0539161	0.473461
GTF3C6	-4.82705	-4.58301	-3.13362	-3.35267	-4.38917	-5.57996	-4.82705
GTPBP10	2.97208	2.65002	-1.63036	1.15266	4.08696	2.79025	NA
GTPBP2	1.72424	1.63236	-0.0171225	2.70016	1.2275	1.37029	1.72424
GTPBP3	4.73061	6.13461	3.51757	2.9422	5.79204	4.28876	NA
GTPBP4	1.66505	3.1762	1.27312	1.76794	0.703831	1.23581	1.66505
GUF1	-2.43717	-1.99058	1.4219	-3.71738	-1.37088	-2.84312	NA
GUK1	-2.01199	-0.899364	-2.91987	-1.55064	-1.93759	-2.27407	NA
GULP1	-0.280214	-0.879792	-0.432693	0.982879	-1.65794	-0.0511337	-0.280214
GUSB	2.71434	2.57374	-0.17917	2.02744	3.66076	2.5395	2.71434
GXYLT1	3.06451	3.46577	2.3472	2.19382	3.16169	2.65123	3.06451
GYG1	-0.48064	-1.31422	-3.22193	-0.0397299	-1.89574	-0.616911	-0.48064
GYPC	-8.47404	-8.74173	-8.58451	0.405462	-10.2703	-8.14187	-8.47404
GYS1	-0.34636	0.494892	0.18619	-1.61194	1.9982	-0.617314	-0.34636
H1F0	2.81281	3.46077	4.03279	0.551648	3.56747	2.75511	2.81281
H1FX	0.40774	0.237756	-0.81576	0.62125	0.204456	0.135469	0.40774
H2AFY	1.23553	2.39219	2.93495	0.573997	0.152851	0.606933	1.23553
H6PD	-0.710826	0.785369	2.00822	2.27494	1.1046	-0.228961	-0.710826
HAAO	-2.02448	-2.31242	-2.43213	3.03926	-3.04297	-1.80549	-2.02448
HABP4	-2.52786	-2.63503	-1.06108	0.387574	-3.74056	-1.9748	-2.52786
HADHA	-2.50425	-2.26577	-4.32148	-3.16306	-0.449847	-2.51715	NA
HADHB	-3.63385	-3.69916	-4.53703	-4.60848	-1.19678	-3.54957	NA
HAGH	1.05833	1.18264	-0.357877	0.0359224	1.12672	1.24571	NA
HAT1	-0.852748	-0.524045	-1.28523	-1.72381	0.0689434	-1.78179	-0.852748
HAUS1	-3.35517	-1.92393	-1.60988	-3.06209	-0.0842152	-4.46732	-3.35517
HAUS2	-1.99294	-1.94962	1.28294	-2.11177	0.272424	-2.30965	-1.99294
HAUS5	5.27962	5.9947	4.12843	4.53813	6.18132	4.79615	5.27962
HAUS8	1.25883	1.79808	-0.00727339	0.658627	2.51437	-0.00831668	1.25883
HAX1	1.04673	1.08922	-1.54358	0.532785	2.79718	0.718874	1.04673
HBS1L	-1.44774	-0.630605	-0.641899	-1.5239	-0.446193	-1.85689	-1.44774
HDAC1	-2.60518	-1.75606	1.09441	-3.2428	-1.61682	-3.21549	-2.60518
HDAC2	-0.936289	0.832188	0.279167	0.364645	3.27859	-1.51895	-0.936289
HDAC4	1.03912	2.01433	1.28648	1.67174	2.49336	1.31714	1.03912
HDAC7	-0.768658	-0.738223	-1.67575	0.188259	-0.548841	-0.343422	-0.768658
HDDC2	-0.357495	-0.583793	0.366827	-1.54462	0.267348	-0.609511	-0.357495
HDDC3	-0.275182	0.050688	1.45954	-1.4578	1.40667	-0.513942	-0.275182
HDHD2	-4.6656	-3.20282	-1.89888	-3.59483	-3.07421	-4.60592	-4.6656
HDHD3	-1.13935	-1.67126	0.351811	-3.7933	-1.0379	-1.02116	NA
HEATR1	4.39846	5.62254	1.44394	4.64179	5.00446	4.10105	4.39846
HEATR3	-2.53362	-0.695659	-2.5117	-0.937544	-0.719314	-3.27431	-2.53362
HEBP1	3.20473	3.46627	1.91756	0.789645	5.69623	3.27259	NA
HEBP2	-0.0478591	-0.263099	0.83058	-0.904256	-2.05363	-0.0999751	-0.0478591
HECA	-3.26348	-2.53825	-2.37345	2.30226	-6.53669	-2.97211	-3.26348
HELLS	2.83816	2.9411	4.32975	1.43455	3.43674	1.69088	2.83816
HELZ2	3.94007	2.6195	-1.91771	3.53492	0.803234	3.83234	3.94007
HERPUD1	-7.48062	-7.17659	-7.12458	-3.15772	-5.74739	-7.1413	-7.48062
HEXIM1	-3.39409	-2.40313	-3.72278	-2.89528	0.421893	-3.54525	-3.39409
HGD	-2.36802	-3.1842	-2.74423	-1.8408	-2.93629	-2.23628	-2.36802
HIBADH	4.63406	3.53719	-0.215117	1.76109	3.30412	4.79272	NA
HIBCH	-1.99469	-0.857477	-2.66271	-3.78952	-1.32813	-2.03365	NA
HID1	-1.45371	-1.45622	-2.60339	-2.13314	-0.580142	-1.17273	-1.45371
HIF1AN	-2.48801	-0.411582	2.03729	-2.56436	2.56986	-2.49848	-2.48801
HINT1	-2.89543	-2.15791	-0.798621	-2.64162	-2.45457	-3.38107	NA
HINT2	-1.87343	-1.22197	-2.01818	-3.10381	1.97345	-2.04904	NA
HINT3	-1.59112	-0.746907	-0.94047	-1.89049	-1.22882	-1.40493	NA
HIP1	1.19793	2.27792	-0.439749	3.08563	1.73066	1.40188	1.19793
HIRIP3	2.50431	1.83349	0.194752	0.112358	3.38993	2.27275	2.50431
HIST1H1C	1.50756	0.873411	1.12504	0.0575496	2.7812	0.922783	1.50756
HK1	-4.43942	-2.79243	-2.53524	-3.6659	-1.2871	-4.58876	NA
HK2	-0.58839	-0.589663	-1.38138	-2.40891	1.82182	-1.32931	NA
HK3	-4.59367	-4.09133	-4.47456	0.740752	-4.9692	-5.11997	-4.59367
HLCS	0.800501	1.87289	3.98693	-0.948831	2.55248	0.744023	0.800501
HLTF	2.82596	3.3515	0.359921	2.7682	3.15048	2.44983	2.82596
HMBS	-0.68009	0.482954	0.400366	-3.72281	2.43114	-1.59885	NA
HMG20A	-4.95625	-3.55526	-1.40088	-2.96017	-1.40051	-4.76643	-4.95625
HMGA1	1.24997	2.41502	0.67011	1.85351	3.56486	0.367334	1.24997
HMGB1	0.142383	0.305657	-1.16728	1.67282	-1.23592	-0.340468	0.142383
HMGB2	-0.0343809	1.01831	2.42985	0.518235	1.72877	-1.78729	-0.0343809
HMGCL	-4.7853	-3.32366	-1.61516	-5.97452	-3.23661	-4.61851	NA
HMGCS1	2.11386	1.67074	0.00744419	-0.32204	4.05907	1.7089	2.11386
HMGCS2	-2.91985	-2.53551	-2.92459	-2.58229	-2.07406	-2.64071	NA
HMGN1	-2.82418	-1.39575	-1.61127	-3.63206	-1.46645	-3.19247	-2.82418
HMGN2	-2.86773	-2.0329	0.080545	-3.15085	-2.18926	-3.81138	-2.86773
HMGN3	-0.377154	-0.638772	-0.15485	-2.02645	0.555233	-0.49835	-0.377154
HMGN4	-1.535	-2.40606	-3.48411	-0.0659487	-3.11719	-1.78896	-1.535
HMGXB4	-2.66213	-0.233493	1.16223	-3.0857	3.8452	-3.53406	-2.66213
HMOX1	-4.3943	-4.19067	-3.47963	-0.0208641	-4.74441	-4.73285	-4.3943
HMOX2	-1.85406	-1.52011	-3.37465	-2.63079	-0.76661	-2.11033	-1.85406
HNMT	-5.71359	-7.29545	-5.90379	-1.7359	-8.07997	-5.22241	-5.71359
HNRNPA0	0.0702496	1.52451	1.69172	0.437027	1.28684	-0.154818	0.0702496
HNRNPAB	1.49241	3.23159	2.62048	1.40657	2.14	0.592644	1.49241
HNRNPD	-0.547718	1.112	1.62257	0.729978	2.24242	-0.843145	-0.547718
HNRNPDL	-3.55547	-2.7188	-1.98225	-4.85473	-4.07441	-3.49659	-3.55547
HNRNPF	-3.35004	-3.23452	-1.67968	-5.16776	-1.01936	-4.31644	-3.35004
HNRNPK	-1.83731	-1.04296	-0.85151	-3.65372	-0.691489	-2.14863	-1.83731
HNRNPLL	-3.13396	-2.77721	-3.61253	-2.10759	-1.67055	-3.2601	-3.13396
HNRNPR	-2.52028	-1.27853	-0.728781	-2.70245	0.425971	-3.08017	-2.52028
HNRNPUL1	3.70739	4.65444	3.58967	3.84924	4.90399	3.42649	3.70739
HOOK2	3.60921	5.17326	2.87349	0.286869	7.10496	3.78688	3.60921
HOOK3	-0.346803	-0.558499	-2.83614	0.552717	0.0421158	-0.0721982	-0.346803
HP1BP3	-1.20911	0.738401	1.71076	0.00572151	-0.598805	-1.30617	-1.20911
HPCAL1	0.141423	-0.69713	-0.768826	1.95933	-0.96939	0.159981	0.141423
HPGD	-1.61886	-2.78714	-0.657911	-0.799856	-1.77999	-1.19693	-1.61886
HPS6	-4.57863	-3.26027	-1.12112	-4.38992	-3.03467	-4.68158	-4.57863
HS1BP3	4.77642	4.76999	3.55407	5.06928	4.61618	4.96041	4.77642
HSBP1	0.417423	0.95025	1.90284	0.595242	1.37051	0.25069	0.417423
HSCB	-5.61104	-4.70765	-3.18501	-5.3232	-0.00554573	-5.91564	NA
HSD11B2	5.29245	6.06105	5.98895	2.26835	4.47966	5.5033	5.29245
HSD17B4	-4.61194	-3.68682	-2.71288	-6.00409	-2.281	-4.42315	NA
HSD17B7	1.33303	1.26574	-1.16096	-0.255353	2.29605	1.35568	1.33303
HSDL1	1.81216	3.53953	4.48074	1.86369	4.96025	1.84363	NA
HSDL2	-1.76525	-2.02037	-0.412708	-3.39796	-2.62333	-1.6175	NA
HSF1	8.01471	6.79561	1.50538	4.75914	5.6583	7.78545	8.01471
HSP90AA1	0.883063	2.50856	1.37859	1.34846	6.08686	0.0465535	0.883063
HSPA12A	-0.375759	0.0752203	0.677296	0.80556	-2.80626	0.0865614	-0.375759
HSPA13	-3.22723	-3.19473	-1.68488	-1.86169	-1.61749	-3.51354	-3.22723
HSPA14	2.30189	2.53719	3.08277	0.503857	-0.176411	1.83732	2.30189
HSPA2	-3.17392	-1.90088	-2.56335	-2.08258	-1.40495	-3.15924	-3.17392
HSPA4	-1.62941	-0.453376	0.773862	-2.81573	-0.00959082	-2.48144	-1.62941
HSPA5	-1.58003	-0.79824	-1.17461	-2.06969	1.65231	-2.08052	-1.58003
HSPA6	0.0455269	-0.278677	-0.56897	0.133736	1.21995	-0.446986	0.0455269
HSPA9	1.89631	3.12556	4.22848	0.282978	2.68949	1.27827	NA
HSPB1	2.11967	2.58533	0.572292	1.94437	0.51719	2.17434	2.11967
HSPB11	-2.42033	-1.18074	-1.1161	-1.9241	-1.50092	-2.96046	-2.42033
HSPB8	-1.27017	-1.50036	-1.39784	1.39396	-3.55501	-0.834747	-1.27017
HSPBP1	1.13024	1.92592	0.751947	0.0105343	2.16371	0.596953	1.13024
HSPD1	3.60893	4.13518	3.43676	1.9542	4.27418	2.89282	NA
HSPG2	-1.79262	-0.871351	-0.803583	1.57378	-0.738337	-1.40563	-1.79262
HSPH1	4.40755	4.52237	3.57459	4.12301	1.46872	4.11013	4.40755
HTRA1	-3.82789	-3.4886	-3.27843	0.693048	-3.81339	-3.39002	-3.82789
HTRA2	-1.12587	-1.52469	-3.02065	-1.23542	0.371689	-1.51005	NA
HTRA3	-1.55087	-1.87205	-1.65779	2.49293	-1.91225	-1.29007	-1.55087
HUS1	4.57853	4.35143	0.17041	3.60786	7.36527	4.42665	4.57853
HYOU1	-0.214416	0.694462	1.21822	-1.53675	2.44444	-0.522162	-0.214416
IAH1	-2.67734	-2.22894	-3.90499	-2.41187	-0.324977	-2.81222	-2.67734
IARS	-0.218757	1.29335	2.43438	-0.77401	1.1109	-0.991741	-0.218757
IARS2	3.94107	2.99218	0.644875	0.568842	4.26846	3.65888	NA
IBA57	3.41742	2.84784	1.06597	1.16526	7.38664	3.40308	NA
ICAM1	-3.0822	-2.7137	-3.37787	2.1034	-2.73498	-3.30412	-3.0822
ICAM2	-6.91186	-7.6117	-7.00166	-0.893024	-6.48659	-6.78292	-6.91186
ICAM3	-7.41028	-6.50148	-7.40149	-4.4534	-10.8302	-7.45888	-7.41028
ICMT	-5.30863	-3.85149	-3.34618	-6.12813	-2.50085	-5.80282	-5.30863
IDE	-3.60072	-2.40422	0.387276	-3.48618	-0.726012	-3.89224	NA
IDH1	-1.80754	-1.18122	-2.04035	-2.4741	0.236347	-2.20635	NA
IDH2	0.00723881	0.54647	1.63911	-0.744647	2.20598	-0.507745	NA
IDH3A	-2.96559	-2.25973	-0.165227	-4.45466	-1.03778	-3.34356	NA
IDH3B	3.60946	3.13724	-0.645943	1.49196	3.01901	3.30127	NA
IDNK	-4.27088	-4.60676	-2.90082	-4.34474	-4.3996	-3.97579	-4.27088
IER3IP1	-3.81302	-2.20768	-1.08776	-3.45757	-1.44195	-4.27919	-3.81302
IFI35	-3.82341	-3.75479	-3.83062	-1.12021	-5.3544	-3.9544	-3.82341
IFIT1	-2.30065	-3.11036	-1.48901	-0.480992	-3.28417	-2.21638	-2.30065
IFIT2	-4.1314	-4.78348	-3.18478	-0.944157	-4.76446	-4.25183	-4.1314
IFIT3	-5.44162	-5.47112	-4.62207	-1.63085	-5.85123	-5.66288	-5.44162
IFIT5	-4.74527	-5.01505	-3.59524	-2.49223	-5.52674	-4.63888	-4.74527
IFITM3	-3.96084	-3.62183	-2.82833	0.43427	-5.75377	-3.8418	-3.96084
IFNGR1	-7.4864	-7.58454	-7.38794	-2.48488	-7.0209	-7.3069	-7.4864
IFT20	-3.66468	-2.54951	-4.66478	-1.42894	1.22107	-3.73734	-3.66468
IFT27	-2.14698	-1.71366	-0.0596619	-3.04299	1.31986	-1.9682	-2.14698
IFT74	-1.45468	-1.18757	0.188638	-2.37007	-1.56862	-1.31273	-1.45468
IGF1R	0.610807	1.40788	1.09168	0.566772	2.08284	1.07552	0.610807
IGFBP3	-1.33967	-1.45186	-2.79787	1.60995	-0.139654	-1.40142	-1.33967
IGFBP4	-4.78012	-5.28877	-5.17826	-0.125484	-3.23286	-4.35455	-4.78012
IGFBP5	1.83454	1.84882	1.83289	4.0153	0.897582	1.97804	1.83454
IGFBP6	-3.97116	-4.09181	-4.09566	-0.385095	-3.51997	-3.62351	-3.97116
IGFBP7	-4.83049	-5.9459	-4.36823	0.913141	-6.0086	-4.26608	-4.83049
IGSF8	1.75364	2.04959	-0.500533	-0.0431921	0.70155	2.07992	1.75364
IKBIP	-3.16688	-3.56751	-3.43931	-0.354838	-1.37114	-3.69456	-3.16688
IKBKB	-0.171117	0.644906	-3.53073	-0.821144	0.404835	0.153417	-0.171117
IL16	-8.04439	-8.60463	-7.8263	-0.579785	-10.98	-7.78774	-8.04439
IL18	-4.87981	-4.76614	-4.20448	-3.5136	-4.36586	-4.88092	-4.87981
IL33	-6.02812	-8.13997	-5.60646	-3.61997	-7.45751	-5.64465	-6.02812
ILF2	4.52554	3.41701	1.24201	1.83086	5.69114	3.94761	4.52554
ILF3	3.13855	4.9187	2.81909	2.87949	6.59349	2.73495	3.13855
ILK	-4.80862	-4.68388	-3.58946	-1.16756	-6.41743	-4.42526	-4.80862
ILKAP	0.313282	0.551856	0.724204	-0.957763	1.05216	-0.149928	0.313282
ILVBL	2.72813	2.7363	1.13041	0.935131	2.30643	2.60705	2.72813
IMMT	1.05112	1.80173	-1.13888	-0.34424	6.38322	0.279596	NA
IMP3	-3.04237	-1.56303	-0.553128	-5.24687	-1.85087	-3.27785	-3.04237
IMP4	1.49601	2.15676	1.4549	0.104664	3.27672	0.866718	1.49601
IMPA1	-0.620675	-0.926208	-4.37721	-0.878292	0.85049	-0.886816	-0.620675
IMPA2	1.59704	2.08169	3.57585	0.147027	1.3273	1.21338	1.59704
IMPAD1	4.1613	3.58586	-1.23988	2.02102	3.67488	3.97802	4.1613
IMPDH1	1.21431	1.59505	-0.806993	1.17142	0.00508452	0.767862	1.21431
IMPDH2	-0.665107	0.688315	-0.587837	-2.40526	0.947978	-0.690071	-0.665107
INF2	0.593901	0.52381	0.903854	0.823057	1.00583	0.488077	0.593901
INIP	-1.81045	-2.0026	0.256057	-3.06941	-0.527296	-2.0826	-1.81045
INO80E	1.15707	0.593149	-2.14884	-0.292265	0.405273	1.28057	1.15707
INPP1	-5.84872	-6.23365	-6.39554	-5.07383	-4.29729	-5.76947	-5.84872
INPP4A	0.421826	0.922226	-0.837034	4.89183	0.438639	0.622065	0.421826
INPP4B	-4.21196	-4.05693	-2.57412	-2.2362	-4.25344	-3.92469	-4.21196
INPP5A	-1.13358	-0.764633	0.306253	-0.150745	-0.858182	-0.730667	-1.13358
INPP5K	-5.83077	-4.42054	-3.41031	-3.37421	-3.99975	-5.63298	-5.83077
INPPL1	4.15853	4.86855	2.85612	3.51269	5.02895	4.17148	4.15853
INSR	-0.0893825	0.671601	0.470082	1.755	0.441625	0.539706	-0.0893825
INTS12	-4.42828	-3.43724	0.401154	-4.5489	-1.07564	-4.8327	-4.42828
INTS7	1.50342	1.58818	-1.73998	0.0640084	3.93685	0.869683	1.50342
INTS8	4.86874	3.20349	-0.740989	2.9425	4.74401	4.48737	4.86874
IP6K1	1.58555	1.57281	2.15899	-0.433978	-0.760231	1.84152	1.58555
IPO13	1.93488	2.33097	3.44403	0.203234	2.91228	1.85637	1.93488
IPO5	1.35882	1.65922	-0.525402	1.02646	1.2403	0.959202	1.35882
IPO7	-1.2179	0.0255324	0.737003	-0.825691	1.46154	-1.43358	-1.2179
IPO8	0.27473	0.646384	-2.63819	-1.0444	4.08581	0.188341	0.27473
IPO9	2.99927	3.65675	1.07028	2.68978	5.96955	2.63475	2.99927
IQCB1	4.80835	4.1862	3.154	3.41323	1.92354	4.62003	4.80835
IQSEC1	0.033268	-0.186983	-0.274521	1.49781	-2.68255	0.5941	0.033268
IRAK4	-1.86531	-2.10481	-3.35478	-0.138285	-0.0477204	-1.61422	-1.86531
IRF2	-6.44593	-6.03533	-2.43252	-2.97487	-5.8861	-6.3603	-6.44593
IRF2BP1	1.12992	1.86525	1.21876	0.011211	3.58505	1.01617	1.12992
IRF2BPL	3.18858	4.42178	4.61432	3.0368	5.52563	3.23832	3.18858
IRF3	-1.2613	-0.338425	-0.927673	0.316712	-0.962956	-1.45783	-1.2613
IRF6	2.20183	1.66264	0.481097	-0.255568	1.98893	2.6171	2.20183
IRGQ	1.81921	3.50677	1.31834	2.5026	5.25264	1.90596	1.81921
IRS1	-0.77969	-0.798566	-0.618756	-1.76445	-0.168716	-0.592305	-0.77969
IRS2	3.40739	4.23142	2.43317	2.97488	5.51884	3.60235	3.40739
ISCA2	-2.07014	-0.664307	-1.07477	-2.29799	3.00632	-2.22597	NA
ISCU	-3.18259	-3.46268	-3.85347	-1.97073	-2.10324	-2.79712	NA
ISG20	-7.1795	-6.97003	-6.58033	-4.40874	-7.33913	-7.54701	-7.1795
ISG20L2	1.96711	2.16503	-0.330239	2.8949	5.06621	1.61112	1.96711
ISLR	-3.35418	-3.38975	-3.14753	3.30339	-3.77967	-3.09072	-3.35418
ISOC1	-0.719722	-0.411486	1.04639	-1.41577	-0.84441	-0.998649	-0.719722
ISOC2	0.954571	1.19367	0.623302	0.675795	2.45749	0.549129	NA
IST1	-2.97401	-0.237529	-2.03053	0.066504	-0.473957	-2.88712	-2.97401
ISYNA1	3.22172	3.86514	2.74842	3.38489	5.25169	3.05298	3.22172
ITGA11	0.498268	0.176433	0.136476	4.87748	-0.377123	0.673621	0.498268
ITGA2	-0.847174	-1.19185	-0.597281	-0.543758	-0.879518	-0.703374	-0.847174
ITGA3	-3.02106	-2.34077	-3.56846	-3.22764	-2.94181	-3.00524	-3.02106
ITGA4	-8.39688	-8.0993	-8.27619	-1.14338	-9.77999	-8.34943	-8.39688
ITGA5	-2.31528	-2.58369	-2.39588	1.52641	-2.33333	-2.48095	-2.31528
ITGA6	-3.9192	-4.47953	-4.50019	-5.29618	-3.82503	-3.69309	-3.9192
ITGA7	-1.10956	-0.677755	-1.36753	1.54113	-1.9127	-0.686333	-1.10956
ITGAL	-6.57556	-7.31734	-7.38574	-0.25784	-9.47129	-6.47772	-6.57556
ITGAM	-5.15932	-5.95259	-5.51351	1.1898	-6.08095	-5.00818	-5.15932
ITGAX	-4.70832	-4.68044	-4.73119	0.363556	-4.28971	-4.82362	-4.70832
ITGB1	-4.39596	-4.60955	-4.69124	-0.699239	-5.4532	-4.48433	-4.39596
ITGB2	-5.09447	-5.37876	-4.86479	1.45171	-6.73325	-5.14054	-5.09447
ITGB3	-2.22931	-1.51546	-2.28493	1.65846	-1.33534	-2.09534	-2.22931
ITGB4	-0.416407	-0.0796089	-0.570841	-1.19584	0.158329	-0.438256	-0.416407
ITGB5	-0.921283	-1.30763	-1.84591	0.508407	-1.02916	-0.529553	-0.921283
ITGB6	-4.04643	-3.69648	-4.94	-3.35062	-3.23577	-4.00474	-4.04643
ITIH5	-2.83356	-3.71767	-2.79458	-0.850734	-3.16804	-2.27141	-2.83356
ITM2B	-5.85079	-5.40531	-7.15827	-3.92856	-6.93418	-5.41859	-5.85079
ITPA	2.34511	2.30132	-1.20793	0.308853	3.72614	1.9991	2.34511
ITPK1	-2.60265	-1.66804	-1.88246	-4.4647	0.909902	-2.69684	-2.60265
ITPKB	-0.349886	0.0273577	-2.1672	3.07899	-0.636022	-0.00105871	-0.349886
ITPKC	-0.19521	0.146392	-0.813091	-0.62051	-2.00211	0.00958337	-0.19521
ITPR2	-1.43682	-2.22521	-3.07065	-1.91401	-2.57414	-1.07975	-1.43682
IVD	-3.3493	-1.94002	0.360686	-5.15242	2.87084	-3.2317	NA
IVNS1ABP	-2.00256	-2.01745	-3.68469	-2.00673	-0.998625	-1.95719	-2.00256
IWS1	-0.0756897	0.934445	-0.212318	0.236509	1.65925	-0.343786	-0.0756897
JAG1	-0.852522	-1.86278	-2.39573	0.0919545	-1.97856	-0.569655	-0.852522
JAGN1	1.65133	1.33143	1.82213	-1.32311	-0.471047	1.52392	1.65133
JAK1	-4.99142	-4.26496	-3.84407	-1.53327	-7.04676	-4.83481	-4.99142
JMJD6	-1.57227	-0.456626	-3.27488	-0.101596	-1.36337	-1.99255	-1.57227
JUNB	-2.91599	-3.12738	-3.3885	-1.65973	-4.14173	-2.82155	-2.91599
JUND	-1.46216	-0.311614	-2.38503	0.232694	-0.944685	-1.35497	-1.46216
KALRN	-0.376122	-0.32218	-0.687231	2.06728	-2.74859	-0.101266	-0.376122
KANK1	1.25465	1.55851	1.80873	0.142601	0.396379	1.80527	1.25465
KANK2	-1.77271	-2.39321	-2.1082	2.2205	-4.18424	-1.04178	-1.77271
KAT5	-1.6449	-1.20215	-2.55646	-3.88028	1.23897	-1.57115	-1.6449
KAT7	1.6919	4.02814	0.442957	4.63764	4.86269	1.78848	1.6919
KAT8	3.03351	2.92693	-0.210382	2.1951	3.23143	3.33719	3.03351
KATNA1	-1.17999	-0.813352	0.624953	0.256323	0.876473	-1.43909	-1.17999
KBTBD11	-2.02453	-2.70297	-0.86472	-0.428863	-4.21769	-1.64312	-2.02453
KCNMA1	-4.32706	-4.90542	-3.71983	-0.426933	-4.40766	-4.16444	-4.32706
KCTD10	-0.488428	0.47614	-1.31498	3.02742	-0.586467	-0.193857	-0.488428
KCTD12	-5.78012	-5.90305	-6.19563	-0.0656958	-5.74384	-5.51903	-5.78012
KCTD21	0.635992	0.32398	-1.25084	-0.0768022	0.104479	0.952109	0.635992
KCTD5	1.25006	1.67864	-0.344857	1.37076	1.44876	0.639118	1.25006
KDM2A	1.2828	2.9108	0.228418	2.38974	4.68673	1.17473	1.2828
KDSR	-5.24919	-3.35058	-0.648472	-2.78113	-2.47831	-5.22424	-5.24919
KEAP1	2.87961	3.34009	2.17056	-0.204198	3.47184	2.69484	2.87961
KHDRBS1	0.508636	1.93081	1.83801	2.07015	3.23547	0.0404437	0.508636
KHK	3.91214	3.46501	2.87538	4.37274	3.16025	3.53445	3.91214
KHNYN	-0.363115	-0.0268156	-0.368972	-1.50532	0.589755	-0.166947	-0.363115
KIAA0319L	-1.86759	-0.138541	0.0326946	-2.88071	1.24376	-1.49269	-1.86759
KIAA0930	-4.54372	-3.66914	-2.31323	-1.21716	-2.25672	-4.71559	-4.54372
KIAA1143	0.707022	0.138792	1.51376	-1.29741	-0.728622	0.890803	0.707022
KIAA1191	0.638614	1.93236	2.25409	-0.491923	2.29362	0.804426	0.638614
KIAA1211	-1.77726	-0.609216	-1.12275	0.719031	1.51354	-1.97778	-1.77726
KIAA1217	0.727936	2.6836	1.08665	1.82709	1.32311	1.21441	0.727936
KIAA1324	-1.23774	-2.4591	-0.842781	-3.45722	-0.00120357	-0.900226	-1.23774
KIAA1522	1.12133	2.94079	3.59115	-1.63169	5.69184	0.99494	1.12133
KIAA2013	-2.56311	-1.89483	0.955973	-2.97919	-0.682636	-3.05031	-2.56311
KIF11	2.43429	3.2466	4.14101	1.24863	3.63159	0.941633	2.43429
KIF13B	-6.37788	-5.15347	-4.16487	-6.85819	-3.21598	-5.99989	-6.37788
KIF16B	2.31284	1.92376	-0.912611	-1.05415	3.14036	2.8965	2.31284
KIF1B	-1.13304	0.0504997	0.966891	0.147427	2.23014	-0.961697	NA
KIF1C	-4.53413	-3.05971	-1.15538	-3.23058	-2.35299	-4.43223	-4.53413
KIF21A	3.91037	4.94518	2.89338	0.520557	5.16878	3.45833	3.91037
KIF22	3.9365	4.55388	2.38251	2.61533	6.44283	3.31602	3.9365
KIF2A	-2.07013	-0.0561063	0.171728	-1.75034	-0.108876	-2.83195	-2.07013
KIF3A	-0.858182	0.323564	0.716912	-1.41364	2.49323	-0.630418	-0.858182
KIF3B	6.55648	5.72227	0.3137	4.94379	5.9895	6.63417	6.55648
KIF5B	-0.0666873	0.418168	0.248595	-0.611321	-1.25245	-0.310665	-0.0666873
KIFAP3	1.6354	0.899188	-2.45808	2.35835	-1.37412	2.07396	1.6354
KIN	1.51312	0.594588	0.955235	0.563407	-2.38833	1.56565	1.51312
KLC2	1.05919	2.25583	0.42957	0.356903	5.72216	0.727975	1.05919
KLF3	-3.59392	-3.34314	-1.7555	-4.70342	-2.2593	-3.28288	-3.59392
KLHDC4	-0.51998	2.18151	1.36662	0.755445	2.35071	-0.925987	-0.51998
KLHL36	1.8652	3.50515	4.52241	3.70486	3.26302	2.1548	1.8652
KLHL42	3.88534	3.8872	2.01738	3.57172	4.1839	3.79448	3.88534
KLHL9	-3.45222	-4.11825	-0.810358	-3.59946	-4.82536	-3.14	-3.45222
KNOP1	4.49167	5.97985	2.9756	3.60881	8.42559	4.0929	4.49167
KNTC1	3.83465	4.99823	3.90098	2.88166	4.11542	3.01049	3.83465
KPNA1	2.15648	1.39442	-0.38242	1.71697	1.87253	2.02498	2.15648
KPNA2	2.6583	3.35121	1.97492	2.54183	3.33094	1.4003	2.6583
KPNA3	0.523469	1.61986	-0.493303	2.55572	-0.100356	0.362326	0.523469
KRAS	2.78674	3.07805	0.82924	2.17862	5.28947	2.59442	2.78674
KRI1	1.82579	2.707	0.856411	1.10938	3.14611	1.50737	1.82579
KRR1	2.80267	1.74071	1.2255	0.556828	2.8963	2.35344	2.80267
KTN1	-0.946792	-0.582274	-0.376223	-2.23379	1.64071	-1.03605	-0.946792
L2HGDH	1.86148	1.98891	2.35752	-0.216186	6.521	1.53969	NA
L3HYPDH	-1.89509	-1.47271	-1.71447	-0.0243748	-0.744714	-1.82168	-1.89509
LACTB	-5.93349	-5.43745	-4.40484	-3.95323	-5.21883	-6.36766	NA
LACTB2	4.04316	3.85099	0.00407802	2.21542	2.98027	3.85587	NA
LAIR1	-6.90377	-6.5468	-6.92649	0.790984	-8.15299	-7.02476	-6.90377
LAMA3	-2.97976	-2.35459	-2.07183	-3.07464	-2.73992	-2.92237	-2.97976
LAMB1	-1.94581	-2.04886	-2.4723	1.06646	-2.36506	-1.8023	-1.94581
LAMB2	-0.703669	-0.0790929	-0.434876	0.518248	-2.2468	-0.10424	-0.703669
LAMC1	1.96109	2.28389	0.524042	3.67167	2.72043	2.00299	NA
LAMC2	-2.86929	-3.02156	-3.21939	-2.29313	-2.32463	-2.84528	-2.86929
LAMP1	1.89775	2.24598	-0.293079	3.05752	-0.42146	2.16351	1.89775
LAMTOR2	0.813951	0.477231	-1.67436	-1.88556	0.870411	0.43929	0.813951
LAMTOR3	-0.167103	-1.14457	3.6642	-0.945452	-4.18284	0.0181435	-0.167103
LAMTOR5	-2.07672	-0.705952	-1.404	-3.33752	-1.9867	-2.40706	-2.07672
LANCL1	-0.348467	-0.954199	-1.20821	-1.84323	-0.0959427	-0.148259	-0.348467
LANCL2	5.24612	4.83925	-0.00566627	3.48812	6.70267	5.11466	5.24612
LAP3	-9.51025	-9.29799	-7.2104	-4.87537	-9.53055	-9.9894	NA
LARP1	0.785605	2.68306	1.40918	2.60633	3.29942	0.601229	0.785605
LARP1B	-1.69682	-0.433505	1.86557	-3.73162	2.74817	-2.1765	-1.69682
LARP4	2.34292	3.76877	1.8857	0.517636	5.07873	1.80546	2.34292
LARP7	-4.62735	-3.3999	0.239641	-3.28441	-4.52272	-4.80494	-4.62735
LARS	-0.775843	1.3266	0.279921	-0.497759	0.662947	-0.881006	-0.775843
LARS2	2.22385	2.29456	2.45191	0.381483	3.0655	1.99853	NA
LBR	1.86629	1.24305	-0.447043	4.3476	1.2885	1.23804	1.86629
LCLAT1	2.41068	2.81588	1.0534	0.710077	6.82124	1.87822	2.41068
LCMT1	2.46581	2.91657	0.533469	2.12179	1.71027	2.61016	2.46581
LCP2	-8.13203	-8.35162	-7.93336	-0.808771	-8.24489	-8.40438	-8.13203
LDB1	-0.282092	0.693354	2.91984	-0.0973824	0.617225	0.255942	-0.282092
LDHA	-2.04126	-1.67975	-1.23338	-3.36918	-1.05524	-2.91718	-2.04126
LDLRAP1	-4.80753	-3.46588	-1.00503	-4.07454	-3.60984	-4.72673	-4.80753
LEMD2	3.89384	3.78533	1.94882	3.27294	2.81526	3.78049	3.89384
LEMD3	3.43818	3.43406	1.09797	1.93393	2.98077	3.44249	3.43818
LENG8	1.16673	2.24451	0.968182	2.52227	0.620426	1.50055	1.16673
LEO1	-6.32483	-5.89114	-2.47363	-8.18377	-0.849668	-7.16009	-6.32483
LETM1	-1.45946	-0.700714	2.26565	-3.4931	0.552519	-1.89974	NA
LETMD1	0.772119	1.94265	0.336246	-0.77164	2.39341	1.06535	NA
LFNG	-1.05043	-0.547642	-2.68285	-2.11921	-0.831323	-0.987996	-1.05043
LGALS3	-1.1699	-0.236348	-0.591266	-1.29433	0.681575	-1.10902	-1.1699
LGALS3BP	-0.130716	0.190849	-1.32074	0.454385	0.656745	-0.195852	-0.130716
LGALS8	-0.347036	-0.307234	-2.76078	-1.13497	2.52377	-0.151265	-0.347036
LGALSL	0.00889445	0.374244	-0.811172	-0.439239	-1.02646	0.350717	0.00889445
LGMN	-3.14504	-2.5792	-2.6299	0.62944	-0.666302	-3.33221	-3.14504
LHPP	-3.91395	-3.04552	-1.8568	-3.59346	-1.46348	-3.7589	-3.91395
LIG1	2.82221	4.09698	3.91965	3.64431	3.516	1.96843	2.82221
LIG3	3.83159	5.85971	4.3118	4.07472	8.29526	3.59331	3.83159
LIMA1	-6.05385	-6.53087	-6.34281	-6.25823	-2.84648	-5.85112	-6.05385
LIMCH1	-2.50189	-2.59737	-0.833145	-1.81908	-0.457727	-2.00549	-2.50189
LIMD1	-0.215758	0.635663	-0.324141	-1.71714	0.307761	-0.178636	-0.215758
LIMK1	0.456253	1.01816	-1.75718	2.16358	1.37645	-0.0116957	0.456253
LIMS1	-3.2085	-3.11227	-3.63158	0.662732	-1.98919	-3.25936	-3.2085
LIN7C	-2.01483	-2.51249	-2.38836	-4.25111	0.798445	-2.07501	-2.01483
LIPA	-5.54327	-5.61559	-5.02301	-2.5393	-6.01472	-5.41142	-5.54327
LLGL2	2.84394	3.30003	1.76157	0.624011	3.3557	2.79528	2.84394
LMAN1	-6.29278	-4.2197	-0.984854	-4.72684	-2.0476	-6.76356	-6.29278
LMAN2L	2.23415	2.06537	0.899769	-0.603025	3.99277	2.15074	2.23415
LMBRD2	1.10845	1.33138	-2.5378	0.162411	3.05933	1.06027	1.10845
LMCD1	-3.38032	-3.75004	-3.5679	-0.625005	-3.86147	-3.04924	-3.38032
LMF2	-4.75767	-2.94833	-2.32217	-3.06181	-1.54807	-5.09258	-4.75767
LMNA	-1.80341	-1.66702	-2.91149	-1.02674	-2.06717	-1.80263	-1.80341
LMOD1	-4.71676	-4.43334	-4.38466	2.26977	-5.33129	-4.15876	-4.71676
LMTK2	6.15058	7.47959	2.98475	4.80125	8.22854	6.18215	6.15058
LNPEP	-3.8218	-2.08286	-1.92931	-1.10516	-3.64468	-3.62863	-3.8218
LONP1	2.68001	4.47178	3.71291	0.976879	5.22536	2.06185	NA
LOX	-2.77743	-2.10723	-2.50072	0.0462135	-1.00648	-2.99188	-2.77743
LOXL1	-3.03203	-2.53556	-2.32926	-0.11789	0.0368293	-2.77281	-3.03203
LPCAT1	-0.124224	-0.227531	-2.8658	0.355444	1.10168	-0.498597	-0.124224
LPCAT3	3.46474	4.72391	0.903067	2.45445	6.33063	3.49808	3.46474
LPCAT4	-3.88282	-2.52596	-1.52951	-3.48497	-1.91152	-4.13471	-3.88282
LPGAT1	0.749284	0.618367	-2.32637	1.37683	0.305687	0.638617	0.749284
LPIN3	9.59663	9.03757	2.45204	5.58621	5.81475	9.77795	9.59663
LPP	-0.479454	-0.568205	-2.89243	2.66971	0.299563	-0.0238228	-0.479454
LRBA	-2.84334	-2.21776	-0.60146	-3.53427	-0.789248	-2.59633	-2.84334
LRCH3	0.744763	1.36347	-1.04264	2.66181	2.81064	0.79285	0.744763
LRIF1	2.60486	3.24725	3.69884	2.85161	2.15263	2.32603	2.60486
LRP1	-0.62955	-0.0450836	-0.889359	3.21605	-0.684875	-0.204059	-0.62955
LRPAP1	0.358419	-0.743063	2.11412	-0.884677	-2.22104	0.315813	0.358419
LRPPRC	4.12101	4.52663	3.30353	2.25138	5.67307	3.56696	NA
LRRC1	1.89799	2.10074	0.171585	0.14397	2.30947	1.72619	1.89799
LRRC14	5.3035	4.44143	0.629585	2.95741	7.16355	5.21231	5.3035
LRRC20	2.03472	3.04643	3.64287	-0.406993	2.13934	1.65173	2.03472
LRRC25	-5.80783	-6.38899	-5.84805	0.343235	-7.51614	-5.88581	-5.80783
LRRC40	-4.00313	-2.74087	-1.96304	-3.34908	-0.226071	-4.67103	-4.00313
LRRC41	1.11947	1.75612	2.94758	-0.00948878	1.74988	0.939896	1.11947
LRRC57	-2.83435	-0.131725	0.963037	-2.85543	2.38949	-2.85027	-2.83435
LRRC59	1.77483	1.53653	0.470948	1.35212	-0.012935	1.08912	1.77483
LRRC8A	-2.44359	-2.13175	-1.37357	-1.62079	-1.95928	-2.33493	-2.44359
LRSAM1	1.39082	1.68853	2.09988	0.469948	1.01589	1.5646	1.39082
LSG1	4.52047	5.87603	1.0483	7.33255	9.16455	4.07001	4.52047
LSM1	-0.144784	0.574731	-2.38774	0.178542	1.50843	-0.467333	-0.144784
LSM12	-0.513135	0.54216	-0.694865	-0.954032	3.34772	-1.48819	-0.513135
LSM14A	-0.314352	1.38475	-1.54112	3.1893	3.4387	-0.371729	-0.314352
LSM14B	11.8783	10.4051	3.7506	7.16149	6.48119	11.7577	11.8783
LSM3	1.00794	-0.153954	0.611729	-1.31393	-0.951501	0.364767	1.00794
LSM4	4.31115	4.05388	3.39173	1.07309	5.64439	3.70074	4.31115
LSM6	-0.740405	-1.15111	1.90218	0.257023	-1.59167	-1.31602	-0.740405
LSM7	0.82417	1.60282	3.01281	-0.247292	1.51617	0.20346	0.82417
LSP1	-7.87214	-8.27091	-7.56273	-0.991873	-8.24841	-7.83133	-7.87214
LSR	6.15355	6.63563	5.11167	4.53688	7.07985	5.90215	6.15355
LSS	-0.601546	-0.548592	1.06116	-0.988775	-1.19092	-0.657044	-0.601546
LTA4H	-2.79553	-2.90758	-3.51716	-2.43858	-2.06477	-2.69711	-2.79553
LTBP2	-2.75154	-2.86135	-2.52289	1.74128	-3.25241	-2.23059	-2.75154
LTN1	-2.08139	-0.773956	1.32147	-0.705916	-1.83021	-1.94779	-2.08139
LTV1	1.84847	1.81102	3.01247	2.26326	0.988228	1.23648	1.84847
LUC7L	3.31526	2.79668	1.97931	2.60966	1.60132	3.88904	3.31526
LUC7L3	1.22252	1.26792	-0.254114	1.32812	-1.65217	1.36563	1.22252
LUM	-3.83199	-4.46054	-3.87902	1.5028	-3.82793	-3.74343	-3.83199
LURAP1L	-2.93894	-3.44761	-2.61357	-3.47827	-4.16376	-2.79378	-2.93894
LUZP1	-5.99385	-4.70019	-1.95122	-3.40669	-4.57121	-5.85178	-5.99385
LXN	-4.79729	-4.94825	-5.49841	-1.93361	-5.04487	-4.84352	-4.79729
LYPLA2	-3.52333	-2.29078	1.31287	-3.56483	-2.0882	-3.59768	-3.52333
LYRM1	0.970162	0.924195	-0.346749	-0.535099	0.580943	1.15365	NA
LYRM2	-1.96508	-1.93212	-0.108473	-2.70921	-2.38247	-2.06058	NA
LYRM7	-0.141158	0.828264	2.27912	-0.329535	0.584044	0.00346299	NA
LYSMD2	-6.64054	-5.7532	-5.16138	-4.19944	-4.20375	-6.98575	-6.64054
LZIC	-1.84246	-1.41509	2.12212	-1.88167	0.478873	-1.94727	-1.84246
LZTFL1	-0.100127	0.422276	-0.335932	-3.4707	0.0910341	0.251767	-0.100127
LZTS2	-0.211505	1.12614	2.64844	-0.296412	0.919038	-0.171927	-0.211505
M6PR	0.743521	0.20398	-2.80982	0.15528	0.583539	0.424501	0.743521
MACROD1	3.01126	2.85545	2.92707	0.0644283	4.24315	3.19136	NA
MAD2L1	2.71093	2.99242	4.70994	1.50355	3.35133	1.43576	2.71093
MAD2L1BP	0.203104	0.100155	-1.60409	-1.89671	1.05122	-0.349991	0.203104
MADD	-1.34221	-0.917898	-0.972199	0.781337	-2.02532	-1.24267	-1.34221
MAEA	-2.84013	-0.919449	-1.56369	-5.97676	-3.10543	-3.10169	-2.84013
MAGI1	1.98696	1.81741	2.02223	-0.497676	1.19027	2.97276	1.98696
MAK16	-3.14947	-1.70371	-0.487326	-2.58022	-0.248164	-3.75794	-3.14947
MALSU1	2.58329	3.82597	-0.845304	1.47061	5.05053	2.19727	NA
MALT1	-6.09358	-4.34784	-2.01943	-1.66115	-4.12579	-6.31866	-6.09358
MAN1A1	-7.47838	-6.97343	-7.10058	-3.37034	-6.9731	-7.21085	-7.47838
MAN1A2	-3.35198	-3.08499	-2.46915	-2.35299	-1.39828	-3.14172	-3.35198
MAN1B1	-1.90215	-1.86874	-0.85096	-2.04424	-2.00154	-2.04456	-1.90215
MAN2A1	-6.71631	-6.1667	-4.92901	-5.17059	-5.152	-6.7096	-6.71631
MAN2B1	0.238129	-1.34651	0.0743969	0.688152	-4.34404	0.379634	0.238129
MAN2C1	-2.56107	-1.49096	-0.687138	-0.715763	-1.0331	-2.02618	-2.56107
MANBA	-1.7955	-1.16698	0.601846	-0.777166	-1.47155	-1.69151	-1.7955
MANF	0.704318	-0.234955	0.961257	-1.32983	0.328437	0.222621	0.704318
MAP1B	1.61127	0.493445	1.68927	1.83235	1.89142	1.76548	1.61127
MAP1S	0.638873	2.07168	-0.134876	1.89869	3.22041	0.484996	0.638873
MAP2K1	-4.13988	-1.83785	-2.62615	-3.94241	-0.862087	-4.67984	-4.13988
MAP2K3	-4.4224	-2.67621	-2.42947	-2.12863	-1.2821	-4.5398	-4.4224
MAP2K4	-8.54836	-6.61024	-2.69662	-8.21524	-2.81319	-8.56123	-8.54836
MAP2K6	-1.2102	-1.45893	-0.905741	-0.162952	-1.57513	-1.07426	-1.2102
MAP2K7	1.96723	3.18146	2.52297	-0.414427	3.27543	1.98238	1.96723
MAP3K11	-2.63154	-0.543777	-3.24247	-1.18734	0.34074	-2.8606	-2.63154
MAP3K2	-3.07002	-1.97967	-3.5613	-0.116323	-0.878645	-3.02644	-3.07002
MAP3K3	-2.11538	-2.14702	-3.4703	1.66904	-3.96141	-1.71519	-2.11538
MAP4	-0.112128	0.697287	0.303075	0.930434	-1.7856	0.172054	-0.112128
MAP4K3	4.0451	4.46749	3.20592	3.33339	5.8045	4.29477	4.0451
MAP7	0.295152	0.5627	1.31839	-2.28372	2.04291	0.377835	0.295152
MAP7D1	-4.37664	-4.17374	-3.46488	-1.14505	-5.02253	-4.44572	-4.37664
MAPK1	-1.99465	-0.929875	0.329449	-1.45508	-0.109429	-2.10182	-1.99465
[truncated: 2,266 more rows]

## Sheet: C_CPTAC_Protein_GSEA
table 4C: GSEA using proteins ranked based on aneuploidy coefficient of the linear model: protein ~ Aneuploidy score + other variable, all accessible proteins were used
model:	protein ~ AS			protein ~ AS + cancer types			protein ~ AS + copy number variation			protein ~ AS + purity (estimated)			protein ~ AS + purity (nuclei)			protein ~ AS + Cell cycle			protein ~ AS, remove mitochondrial genes
GeneSet	NES_CPTAC_AS	NP_CPTAC_AS	FDR_CPTAC_AS	NES_CPTAC_AS_cancer	NP_CPTAC_AS_cancer	FDR_CPTAC_AS_cancer	NES_CPTAC_AS_cnv	NP_CPTAC_AS_cnv	FDR_CPTAC_AS_cnv	NES_CPTAC_AS_estiPurity	NP_CPTAC_AS_estiPurity	FDR_CPTAC_AS_estiPurity	NES_CPTAC_AS_nucleiPurity	NP_CPTAC_AS_nucleiPurity	FDR_CPTAC_AS_nucleiPurity	NES_CPTAC_AS_cellcycle	NP_CPTAC_AS_cellcycle	FDR_CPTAC_AS_cellcycle	NES_CPTAC_AS_removeMito	NP_CPTAC_AS_removeMito	FDR_CPTAC_AS_removeMito
GO_MITOCHONDRIAL_GENE_EXPRESSION	3.5292	0	0	3.5274	0	0	3.5531	0	0	3.3294	0	0	3.5305	0	0	3.527	0	0
GO_MITOCHONDRIAL_TRANSLATION	3.4259	0	0	3.4929	0	0	3.5193	0	0	3.1282	0	0	3.3406	0	0	3.4789	0	0
GO_TRANSLATIONAL_ELONGATION	3.3336	0	0	3.4034	0	0	3.2898	0	0	2.9632	0	0	3.0866	0	0	3.2995	0	0	0.5029	0.9868	1
GO_MITOCHONDRIAL_TRANSLATIONAL_TERMINATION	3.366	0	0	3.3974	0	0	3.3167	0	0	3.0075	0	0	3.1088	0	0	3.2741	0	0
GO_TRANSLATIONAL_TERMINATION	3.1791	0	0	3.2384	0	0	3.2328	0	0	2.9123	0	0	3.1245	0	0	3.2215	0	0	0.7562	0.7446	0.9888
GO_RNA_METABOLIC_PROCESS	3.1097	0	0	3.1456	0	0	3.2324	0	0	2.7049	0	0	2.9941	0	0	3.0075	0	0	3.4426	0	0
GO_MRNA_METABOLIC_PROCESS	3.0644	0	0	3.1115	0	0	3.0282	0	0	2.8232	0	0	3.0931	0	0	3.0162	0	0	3.4123	0	0
GO_RIBONUCLEOPROTEIN_COMPLEX_BIOGENESIS	2.9976	0	0	3.05	0	0	3.1253	0	0	2.5883	0	0	2.8724	0	0	2.8956	0	0	3.232	0	0
GO_RNA_SPLICING_VIA_TRANSESTERIFICATION_REACTIONS	2.882	0	0	2.9688	0	0	2.844	0	0	2.6234	0	0	2.8958	0	0	2.8476	0	0	3.2787	0	0
GO_RNA_SPLICING	2.886	0	0	2.9254	0	0	2.8893	0	0	2.6006	0	0	2.9049	0	0	2.779	0	0	3.2653	0	0
GO_NCRNA_PROCESSING	2.9692	0	0	2.9102	0	0	3.0263	0	0	2.4345	0	0	2.7129	0	0	2.8187	0	0	3.1812	0	0
GO_NCRNA_METABOLIC_PROCESS	2.9633	0	0	2.9048	0	0	3.1193	0	0	2.409	0	0	2.7349	0	0	2.8329	0	0	3.0799	0	0
GO_RIBOSOME_BIOGENESIS	2.8613	0	0	2.8512	0	0	3.0691	0	0	2.5283	0	0	2.7627	0	0	2.7238	0	0	3.0005	0	0
GO_DNA_REPLICATION	2.7608	0	0	2.7772	0	0	2.7923	0	0	2.6429	0	0	2.7567	0	0	2.5104	0	0	3.0124	0	0
GO_RNA_3_END_PROCESSING	2.7698	0	0	2.7709	0	0	2.8382	0	0	2.5169	0	0	2.908	0	0	2.6672	0	0	3.0141	0	0
GO_RIBONUCLEOPROTEIN_COMPLEX_SUBUNIT_ORGANIZATION	2.643	0	0	2.7663	0	0	2.663	0	0	2.193	0	0.0002	2.4946	0	0	2.5625	0	0	2.7694	0	0
GO_MRNA_3_END_PROCESSING	2.7268	0	0	2.7347	0	0	2.7258	0	0	2.5398	0	0	2.8613	0	0	2.5871	0	0	3.0609	0	0
GO_RRNA_METABOLIC_PROCESS	2.7138	0	0	2.7216	0	0	2.9234	0	0	2.3147	0	0	2.6067	0	0	2.5807	0	0	2.9831	0	0
GO_DNA_DEPENDENT_DNA_REPLICATION	2.5737	0	0	2.5906	0	0	2.5841	0	0	2.6265	0	0	2.5495	0	0	2.3929	0	0	2.7615	0	0
GO_MACROMOLECULE_METHYLATION	2.6975	0	0	2.5457	0	0	2.3973	0	0	2.4517	0	0	2.3944	0	0	2.6342	0	0	2.7743	0	0
GO_RNA_MODIFICATION	2.6446	0	0	2.5414	0	0	2.433	0	0	2.1027	0	0.0008	2.2982	0	0	2.5467	0	0	2.7101	0	0
GO_NCRNA_TRANSCRIPTION	2.4665	0	0	2.5313	0	0	2.494	0	0	2.3659	0	0	2.6835	0	0	2.3539	0	0	2.6831	0	0
GO_CELLULAR_PROTEIN_COMPLEX_DISASSEMBLY	2.4745	0	0	2.5091	0	0	2.538	0	0	2.2063	0	0.0002	2.1368	0	0.0007	2.439	0	0	-1.9951	0	0.003
GO_PEPTIDE_BIOSYNTHETIC_PROCESS	2.3614	0	0	2.4818	0	0	2.5682	0	0	1.9721	0	0.0041	2.0788	0	0.0014	2.3759	0	0	1.0221	0.3789	0.7029
GO_RNA_METHYLATION	2.5001	0	0	2.471	0	0	2.3778	0	0	2.358	0	0	2.2746	0	0	2.5436	0	0	2.4478	0	0
GO_TRNA_METABOLIC_PROCESS	2.4322	0	0	2.4688	0	0	2.6026	0	0	2.0162	0	0.0028	2.1758	0	0.0005	2.3595	0	0	2.2304	0	0.0002
GO_MRNA_EXPORT_FROM_NUCLEUS	2.2135	0	0.0001	2.454	0	0	2.4011	0	0	2.0225	0	0.0026	2.435	0	0	2.1478	0	0.0004	2.468	0	0
GO_AMIDE_BIOSYNTHETIC_PROCESS	2.366	0	0	2.4474	0	0	2.5387	0	0	1.9257	0	0.0071	2.0811	0	0.0013	2.3512	0	0	1.0666	0.2778	0.6415
GO_RNA_EXPORT_FROM_NUCLEUS	2.2217	0	0.0001	2.4468	0	0	2.5799	0	0	2.0513	0	0.0019	2.3158	0	0	2.189	0	0.0002	2.5498	0	0
GO_CHROMOSOME_ORGANIZATION	2.457	0	0	2.4391	0	0	2.3711	0	0	2.4582	0	0	2.2832	0	0	2.262	0	0.0001	2.8102	0	0
GO_REGULATION_OF_MRNA_PROCESSING	2.4711	0	0	2.4354	0	0	2.3504	0	0	2.2608	0	0	2.4883	0	0	2.407	0	0	2.7908	0	0
GO_METHYLATION	2.4005	0	0	2.3982	0	0	2.1927	0	0.0002	2.2921	0	0	2.1077	0	0.001	2.4541	0	0	2.5635	0	0
GO_TRANSCRIPTION_BY_RNA_POLYMERASE_III	2.3283	0	0	2.3923	0	0	2.3872	0	0	2.2799	0	0	2.5105	0	0	2.2307	0	0.0001	2.5568	0	0
GO_RIBOSOMAL_SMALL_SUBUNIT_BIOGENESIS	2.3435	0	0	2.3916	0	0	2.445	0	0	1.9397	0	0.0059	2.1921	0	0.0004	2.2298	0	0.0001	2.4116	0	0
GO_DNA_TEMPLATED_TRANSCRIPTION_TERMINATION	2.4854	0	0	2.3743	0	0	2.3238	0	0	2.2129	0	0.0002	2.3386	0	0	2.4179	0	0	2.7233	0	0
GO_TRNA_PROCESSING	2.4037	0	0	2.3686	0	0	2.4388	0	0	1.9734	0	0.0043	2.1455	0	0.0007	2.3579	0	0	2.489	0	0
GO_CHROMATIN_ORGANIZATION	2.3628	0	0	2.3642	0	0	2.3722	0	0	2.4076	0	0	2.141	0	0.0007	2.234	0	0.0001	2.6856	0	0
GO_RNA_LOCALIZATION	2.3175	0	0	2.3629	0	0	2.6404	0	0	2.2303	0	0.0001	2.1597	0	0.0006	2.2729	0	0.0001	2.5626	0	0
GO_CELL_CYCLE_DNA_REPLICATION	2.1877	0	0.0002	2.3536	0	0	2.282	0	0	2.1447	0	0.0005	2.2938	0	0	1.9174	0	0.0074	2.4291	0	0
GO_DNA_TEMPLATED_TRANSCRIPTION_ELONGATION	2.3922	0	0	2.3513	0	0	2.3515	0	0	2.3562	0	0	2.437	0	0	2.2776	0	0.0001	2.6126	0	0
GO_MRNA_TRANSPORT	2.1687	0	0.0002	2.3511	0	0	2.3671	0	0	2.1144	0	0.0007	2.2004	0	0.0003	2.105	0	0.0006	2.3791	0	0
GO_MITOCHONDRIAL_TRANSPORT	2.2676	0	0	2.3491	0	0	2.1924	0	0.0002	1.9301	0	0.0067	2.1359	0	0.0007	2.3235	0	0	-0.8537	0.722	0.8209
GO_MATURATION_OF_SSU_RRNA	2.2699	0	0	2.3371	0	0	2.4849	0	0	2.0734	0	0.0014	2.1826	0	0.0004	2.2566	0	0.0001	2.4677	0	0
GO_MATURATION_OF_SSU_RRNA_FROM_TRICISTRONIC_RRNA_TRANSCRIPT_SSU_RRNA_5_8S_RRNA_LSU_RRNA_	2.3085	0	0	2.3357	0	0	2.4005	0	0	2.1346	0	0.0006	2.2544	0	0.0001	2.2687	0	0.0001	2.3628	0	0
GO_RNA_POLYADENYLATION	2.3131	0	0	2.3325	0	0	2.257	0	0.0001	1.9345	0.0037	0.0063	2.3367	0	0	2.2013	0	0.0002	2.5166	0	0
GO_PROTEIN_CONTAINING_COMPLEX_DISASSEMBLY	2.2453	0	0	2.322	0	0	2.3125	0	0	1.8743	0	0.012	2.0143	0	0.0028	2.1915	0	0.0002	-1.4759	0.0172	0.1409
GO_DNA_METABOLIC_PROCESS	2.36	0	0	2.3199	0	0	2.1891	0	0.0002	2.2626	0	0	2.2665	0	0.0001	2.1962	0	0.0002	2.5528	0	0
GO_REGULATION_OF_DNA_REPLICATION	2.2222	0	0.0001	2.3087	0	0	2.4065	0	0	2.019	0	0.0027	2.1391	0	0.0007	2.0334	0	0.0017	2.4275	0	0
GO_ESTABLISHMENT_OF_RNA_LOCALIZATION	2.2179	0	0.0001	2.3005	0	0	2.5388	0	0	2.1606	0	0.0004	2.0692	0	0.0015	2.1481	0	0.0004	2.4005	0	0
GO_PROTEIN_TARGETING_TO_MITOCHONDRION	2.244	0	0	2.292	0	0.0001	2.341	0	0	2.0628	0	0.0017	1.9144	0	0.0089	2.3587	0	0	-0.9088	0.5812	0.7485
GO_NUCLEAR_DNA_REPLICATION	2.1666	0	0.0002	2.2883	0	0.0001	2.2181	0	0.0001	2.0122	0	0.0029	2.1477	0	0.0007	1.829	0.0077	0.0169	2.3577	0	0
GO_NUCLEOTIDE_EXCISION_REPAIR_DNA_GAP_FILLING	2.1331	0	0.0003	2.2834	0	0.0001	2.2047	0	0.0002	1.9832	0	0.004	2.4425	0	0	1.9938	0	0.0027	2.289	0	0.0001
GO_NUCLEOBASE_CONTAINING_COMPOUND_TRANSPORT	2.1753	0	0.0002	2.276	0	0.0001	2.4843	0	0	2.1993	0	0.0002	2.0476	0	0.002	2.0999	0	0.0007	2.3099	0	0.0001
GO_MITOCHONDRIAL_CALCIUM_ION_TRANSMEMBRANE_TRANSPORT	2.2349	0	0.0001	2.2753	0	0.0001	2.2258	0	0.0001	1.9721	0.0019	0.0042	2.0985	0	0.0011	2.2395	0	0.0001
GO_CHROMATIN_REMODELING	2.2547	0	0	2.2684	0	0.0001	2.39	0	0	2.1103	0	0.0007	2.3362	0	0	1.9735	0	0.0036	2.5087	0	0
GO_DNA_DAMAGE_RESPONSE_DETECTION_OF_DNA_DAMAGE	2.2659	0	0	2.2592	0	0.0001	2.0501	0	0.0014	2.0684	0	0.0016	2.5172	0	0	2.1677	0	0.0003	2.2546	0	0.0002
GO_DNA_REPAIR	2.29	0	0	2.2578	0	0.0001	2.1893	0	0.0002	2.1833	0	0.0003	2.2259	0	0.0002	2.1446	0	0.0003	2.5054	0	0
GO_RIBOSOMAL_LARGE_SUBUNIT_BIOGENESIS	2.265	0	0	2.2564	0	0.0001	2.2551	0	0.0001	1.7609	0.0072	0.0329	1.9338	0	0.0074	2.0925	0	0.0008	2.2384	0	0.0002
GO_SPLICEOSOMAL_SNRNP_ASSEMBLY	2.2989	0	0	2.2533	0	0.0001	2.1421	0	0.0004	1.9841	0	0.004	2.1153	0	0.0009	2.2237	0	0.0001	2.5403	0	0
GO_RNA_PHOSPHODIESTER_BOND_HYDROLYSIS_ENDONUCLEOLYTIC	2.2619	0	0	2.2512	0	0.0001	2.0837	0	0.0008	1.9792	0	0.004	1.9062	0	0.0095	2.2204	0	0.0001	2.3883	0	0
GO_NUCLEIC_ACID_PHOSPHODIESTER_BOND_HYDROLYSIS	2.1659	0	0.0002	2.2511	0	0.0001	2.2047	0	0.0002	2.1801	0	0.0002	2.0116	0	0.0028	2.1641	0	0.0003	2.3425	0	0
GO_MITOCHONDRIAL_TRANSMEMBRANE_TRANSPORT	2.3386	0	0	2.2379	0	0.0001	2.365	0	0	2.1443	0	0.0005	2.3519	0	0	2.305	0	0
GO_DNA_TEMPLATED_TRANSCRIPTION_INITIATION	2.1865	0	0.0001	2.2224	0	0.0001	2.1913	0	0.0002	2.3731	0	0	1.8685	0	0.0142	2.072	0	0.0011	2.4105	0	0
GO_SPLICEOSOMAL_COMPLEX_ASSEMBLY	2.174	0	0.0002	2.2205	0	0.0001	2.1112	0	0.0006	2.0455	0	0.002	2.2383	0	0.0001	2.2157	0	0.0001	2.3636	0	0
GO_INNER_MITOCHONDRIAL_MEMBRANE_ORGANIZATION	2.2392	0	0.0001	2.2125	0	0.0001	2.1528	0	0.0004	1.9666	0	0.0044	2.1898	0	0.0004	2.3062	0	0
GO_CELLULAR_AMIDE_METABOLIC_PROCESS	2.1566	0	0.0002	2.2096	0	0.0001	2.2855	0	0	1.6724	0	0.0648	1.8877	0	0.0117	2.155	0	0.0003	0.8234	0.9489	0.9517
GO_RNA_5_END_PROCESSING	2.0526	0	0.0012	2.2034	0	0.0001	2.2933	0	0	2.1014	0	0.0008	1.8557	0	0.0156	2.0293	0	0.0018	2.0928	0	0.0011
GO_REGULATION_OF_MITOCHONDRIAL_TRANSLATION	2.1627	0	0.0002	2.1967	0	0.0002	2.2191	0	0.0001	2.0256	0	0.0026	2.0399	0	0.0022	2.1726	0	0.0003
GO_SNRNA_TRANSCRIPTION	2.1529	0	0.0003	2.1963	0	0.0002	2.0528	0	0.0013	2.0521	0	0.0019	2.3376	0	0	1.9955	0	0.0026	2.3597	0	0
GO_TRANSCRIPTION_ELONGATION_FROM_RNA_POLYMERASE_II_PROMOTER	2.0964	0.0017	0.0006	2.1862	0	0.0002	2.1214	0	0.0005	2.0501	0	0.0019	2.1976	0	0.0003	2.0249	0	0.0018	2.4126	0	0
GO_PROTEIN_LOCALIZATION_TO_MITOCHONDRION	2.1271	0	0.0003	2.1737	0	0.0002	2.1349	0	0.0004	2.0259	0	0.0026	1.8678	0	0.0141	2.156	0	0.0003	0.974	0.4672	0.7735
GO_REGULATION_OF_GENE_EXPRESSION_EPIGENETIC	2.1739	0	0.0002	2.1714	0	0.0002	2.1486	0	0.0004	2.0632	0	0.0017	2.0134	0	0.0028	2.0943	0	0.0008	2.3989	0	0
GO_SISTER_CHROMATID_SEGREGATION	2.2158	0	0.0001	2.1701	0	0.0002	1.9252	0	0.0058	2.1393	0	0.0005	1.8089	0	0.023	1.9071	0.0019	0.0081	2.4665	0	0
GO_NUCLEAR_CHROMOSOME_SEGREGATION	2.189	0	0.0002	2.1691	0	0.0002	1.9539	0.0018	0.0043	2.123	0	0.0007	1.9511	0	0.0061	1.8635	0	0.0121	2.3991	0	0
GO_MRNA_CIS_SPLICING_VIA_SPLICEOSOME	2.0927	0	0.0007	2.1601	0	0.0002	2.0474	0	0.0014	2.0406	0.0019	0.0022	2.1539	0	0.0006	2.0688	0	0.0011	2.2832	0	0.0001
GO_TERMINATION_OF_RNA_POLYMERASE_II_TRANSCRIPTION	2.1458	0	0.0003	2.16	0	0.0002	2.173	0	0.0003	1.9546	0	0.005	2.152	0	0.0006	2.0262	0	0.0018	2.3828	0	0
GO_TRANSCRIPTION_BY_RNA_POLYMERASE_I	2.2411	0	0.0001	2.1559	0	0.0002	2.1774	0	0.0002	2.1182	0	0.0007	2.2574	0	0.0001	2.2815	0	0	2.4997	0	0
GO_RNA_PHOSPHODIESTER_BOND_HYDROLYSIS	2.0175	0	0.0019	2.1501	0	0.0003	2.1144	0	0.0005	2.1086	0	0.0007	1.7204	0.0049	0.0471	2.0534	0	0.0014	2.266	0	0.0001
GO_REGULATION_OF_MRNA_SPLICING_VIA_SPLICEOSOME	2.1729	0	0.0002	2.1412	0	0.0003	2.033	0	0.0016	2.0909	0	0.001	2.0256	0	0.0026	2.1202	0	0.0005	2.3511	0	0
GO_REGULATION_OF_RNA_METABOLIC_PROCESS	2.0959	0	0.0006	2.1323	0	0.0003	2.1564	0	0.0003	1.916	0	0.0078	2.2104	0	0.0002	1.9507	0	0.0049	2.4026	0	0
GO_MITOCHONDRIAL_RNA_METABOLIC_PROCESS	2.1277	0.0019	0.0003	2.1312	0	0.0003	2.1617	0	0.0003	2.0233	0	0.0026	2.3482	0	0	2.0821	0	0.0009
GO_MISMATCH_REPAIR	2.1535	0	0.0003	2.1277	0	0.0004	2.1672	0	0.0003	2.1968	0	0.0003	2.0975	0	0.0011	2.0552	0	0.0014	2.1978	0	0.0002
GO_REGULATION_OF_NUCLEOBASE_CONTAINING_COMPOUND_METABOLIC_PROCESS	2.0766	0	0.0009	2.1272	0	0.0004	2.0453	0	0.0014	1.9818	0	0.004	2.1238	0	0.0007	1.9	0	0.0086	2.4233	0	0
GO_SISTER_CHROMATID_COHESION	2.1426	0	0.0003	2.1191	0	0.0004	1.9319	0.0018	0.0054	1.9151	0.0018	0.0078	1.9081	0	0.0094	1.9878	0	0.0029	2.3029	0	0.0001
GO_RIBOSOME_ASSEMBLY	1.9512	0.0018	0.0042	2.1005	0	0.0005	2.1651	0	0.0003	1.7284	0.0056	0.043	2.0094	0	0.0029	1.8826	0.0019	0.01	1.5503	0.0224	0.1218
GO_COVALENT_CHROMATIN_MODIFICATION	2.1169	0	0.0004	2.0961	0	0.0006	2.1412	0	0.0004	2.2159	0	0.0002	1.8973	0	0.0105	2.0274	0	0.0018	2.4444	0	0
GO_TRNA_MODIFICATION	2.1492	0	0.0003	2.0945	0	0.0006	2.0427	0.0019	0.0014	1.7385	0.0053	0.0398	1.787	0	0.028	2.0554	0	0.0014	2.2465	0	0.0002
GO_DNA_STRAND_ELONGATION_INVOLVED_IN_DNA_REPLICATION	2.0609	0	0.0011	2.0931	0	0.0006	2.0474	0	0.0014	2.0487	0	0.0019	2.0769	0	0.0014	2.086	0	0.0008	2.161	0	0.0005
GO_PROTEIN_TRANSMEMBRANE_IMPORT_INTO_INTRACELLULAR_ORGANELLE	2.0497	0	0.0012	2.0883	0	0.0006	2.218	0	0.0001	2.0009	0	0.0035	2.0306	0.0023	0.0024	2.0542	0	0.0014
GO_ATP_DEPENDENT_CHROMATIN_REMODELING	2.0231	0	0.0018	2.0806	0	0.0007	1.9607	0	0.004	1.8508	0.0018	0.0149	2.0867	0	0.0012	1.8548	0	0.013	2.2589	0	0.0001
GO_MEIOTIC_CELL_CYCLE_PROCESS	1.9887	0	0.0028	2.0772	0	0.0008	1.6555	0.0145	0.0595	2.0021	0	0.0034	1.9235	0.0023	0.0082	1.8196	0.0019	0.0184	2.1095	0	0.0009
GO_RRNA_TRANSCRIPTION	2.0712	0.0019	0.001	2.0762	0	0.0008	2.1311	0	0.0004	2.1337	0	0.0006	2.1367	0	0.0007	2.0483	0	0.0015	2.251	0	0.0002
GO_TRNA_METHYLATION	2.1076	0	0.0005	2.0745	0	0.0008	2.0461	0	0.0014	2.0146	0	0.0028	2.133	0	0.0007	2.1198	0	0.0005	2.031	0	0.0026
GO_REGULATION_OF_DNA_DEPENDENT_DNA_REPLICATION	2.0461	0	0.0013	2.0714	0	0.0008	2.0456	0	0.0014	2.0918	0	0.001	1.8331	0.0021	0.019	1.8619	0.0038	0.0122	2.1976	0	0.0002
GO_REGULATION_OF_DNA_METABOLIC_PROCESS	2.089	0	0.0007	2.0667	0	0.0009	1.8995	0	0.0077	2.1022	0	0.0008	2.092	0	0.0012	2.0884	0	0.0008	2.2318	0	0.0002
GO_MRNA_MODIFICATION	2.0037	0	0.0023	2.0654	0	0.0009	2.0859	0	0.0007	1.9743	0	0.0042	2.1017	0	0.001	2.0686	0	0.0011	1.9567	0	0.0055
GO_CHROMOSOME_SEGREGATION	2.085	0	0.0007	2.0639	0	0.0009	1.9226	0	0.0059	2.1313	0	0.0006	1.8377	0	0.0184	1.8846	0	0.0097	2.269	0	0.0001
GO_DNA_REPLICATION_INITIATION	2.1162	0	0.0004	2.0552	0	0.0011	2.0938	0	0.0007	2.1005	0	0.0008	2.0506	0	0.002	2.0332	0	0.0017	2.2903	0	0.0001
GO_DNA_CONFORMATION_CHANGE	2.0732	0	0.0009	2.0466	0	0.0012	2.1131	0	0.0005	1.9945	0	0.0037	2.0054	0	0.0029	1.8903	0	0.0092	2.2913	0	0.0001
GO_PEPTIDYL_LYSINE_MODIFICATION	1.9879	0	0.0028	2.0466	0	0.0012	2.0249	0	0.0017	1.8996	0	0.0092	1.8661	0	0.0143	1.8596	0	0.0124	2.2338	0	0.0002
GO_MITOCHONDRION_ORGANIZATION	2.0014	0	0.0024	2.045	0	0.0013	1.9619	0	0.0039	1.6788	0	0.0619	1.6797	0	0.0618	2.1519	0	0.0003	-1.2244	0.1231	0.3471
GO_REGULATION_OF_RNA_SPLICING	2.0566	0	0.0012	2.0389	0	0.0014	2.1517	0	0.0004	1.7405	0	0.0392	1.9981	0	0.0032	2.0068	0.0018	0.0023	2.2281	0	0.0002
GO_ESTABLISHMENT_OF_PROTEIN_LOCALIZATION_TO_MITOCHONDRIAL_MEMBRANE	2.1592	0	0.0002	2.0379	0	0.0014	2.0696	0	0.001	1.7894	0.0075	0.0258	2.1036	0	0.001	2.2324	0	0.0001
GO_DNA_STRAND_ELONGATION	2.069	0	0.001	2.0278	0	0.0016	2.0654	0	0.001	2.1167	0	0.0007	2.0965	0	0.0011	2.1142	0	0.0005	2.1744	0	0.0004
GO_REGULATION_OF_MRNA_3_END_PROCESSING	2.0184	0	0.0019	2.0258	0	0.0017	1.9402	0.0019	0.0051	1.6501	0.0147	0.0766	2.0495	0	0.002	2.0104	0	0.0022	2.3395	0	0
GO_REGULATION_OF_DNA_TEMPLATED_TRANSCRIPTION_ELONGATION	2.1887	0	0.0002	2.0243	0	0.0017	2.1714	0	0.0003	2.0605	0	0.0017	2.3131	0	0	2.0423	0	0.0015	2.3554	0	0
GO_PROTEIN_DNA_COMPLEX_SUBUNIT_ORGANIZATION	1.9382	0	0.0048	2.0194	0	0.0017	2.2014	0	0.0002	1.6343	0	0.0842	2.0151	0	0.0028	1.8254	0	0.0176	2.2264	0	0.0002
GO_NUCLEAR_EXPORT	1.8035	0	0.0184	2.0148	0.0018	0.0018	2.2603	0	0.0001	1.7008	0	0.0524	1.8333	0	0.0191	1.7076	0.0019	0.0429	2.2095	0	0.0002
GO_NEGATIVE_REGULATION_OF_NUCLEOBASE_CONTAINING_COMPOUND_METABOLIC_PROCESS	2.0032	0	0.0023	2.0134	0	0.0018	2.0009	0	0.0023	1.7088	0.0053	0.05	1.9893	0	0.0036	1.9478	0	0.0051	2.1718	0	0.0004
GO_MITOTIC_SISTER_CHROMATID_SEGREGATION	2.1082	0	0.0005	2.0073	0	0.002	1.6723	0.0018	0.0544	2.1771	0	0.0003	1.7026	0.0024	0.0526	1.7296	0.0074	0.0376	2.3752	0	0
GO_DOUBLE_STRAND_BREAK_REPAIR	2.0686	0	0.001	2.0033	0	0.0021	1.7539	0.0037	0.0303	2.0778	0	0.0013	2.0384	0	0.0022	2.0705	0	0.0011	2.237	0	0.0002
GO_DNA_RECOMBINATION	1.9811	0	0.003	2.003	0	0.0021	1.8335	0	0.0149	1.9642	0	0.0046	2.1021	0	0.001	1.9037	0	0.0083	2.0714	0	0.0015
GO_NUCLEOTIDE_EXCISION_REPAIR_DNA_INCISION	1.9653	0	0.0036	2	0	0.0022	1.8185	0	0.0171	1.9121	0	0.0079	2.1447	0	0.0007	1.9373	0	0.0058	2.0147	0	0.0029
GO_NEGATIVE_REGULATION_OF_DNA_METABOLIC_PROCESS	1.9829	0	0.003	1.9961	0	0.0023	1.8625	0	0.0113	1.9821	0	0.004	2.0396	0	0.0022	2.0261	0	0.0018	2.0886	0	0.0012
GO_MITOCHONDRIAL_MEMBRANE_ORGANIZATION	1.9988	0	0.0024	1.9944	0	0.0024	2.0156	0	0.0019	1.528	0.0142	0.1529	1.9603	0	0.0055	2.1153	0	0.0005	0.8052	0.7465	0.9599
GO_POSITIVE_REGULATION_OF_MITOCHONDRIAL_TRANSLATION	1.9079	0	0.0068	1.9862	0	0.0027	1.9851	0.002	0.0029	1.5923	0.036	0.1077	1.5933	0.0265	0.101	1.7957	0.0019	0.0225
GO_TELOMERE_MAINTENANCE_VIA_SEMI_CONSERVATIVE_REPLICATION	1.8337	0.0059	0.0147	1.9842	0	0.0028	1.9515	0.0019	0.0043	1.9519	0.0018	0.0051	2.3314	0	0	1.6108	0.0274	0.0851	2.0045	0	0.0033
GO_MEIOTIC_CHROMOSOME_SEGREGATION	1.9493	0.0019	0.0043	1.9789	0	0.0029	1.7275	0.0113	0.0369	1.7216	0.0153	0.0453	1.7962	0.0063	0.0258	1.7391	0.0061	0.0357	1.9622	0	0.0052
GO_MRNA_CLEAVAGE	1.8389	0.0057	0.014	1.9766	0	0.003	1.8278	0	0.0158	1.8712	0.0055	0.0123	1.8282	0.0046	0.0197	1.8503	0.002	0.0136	2.0432	0	0.0022
GO_NUCLEAR_TRANSPORT	1.8089	0	0.0176	1.9651	0	0.0036	2.1265	0	0.0005	1.7113	0.0016	0.049	1.8642	0	0.0146	1.7332	0	0.0368	2.1821	0	0.0004
GO_TELOMERE_ORGANIZATION	1.9847	0	0.003	1.9593	0	0.0037	1.785	0.0018	0.0236	1.9375	0	0.0061	2.1192	0	0.0008	1.8362	0	0.0158	2.2051	0	0.0002
GO_AMINO_ACID_ACTIVATION	1.887	0.0018	0.0085	1.9551	0.0018	0.004	2.1359	0	0.0004	1.6308	0.0093	0.0858	1.7761	0.005	0.0312	1.7258	0.0058	0.0382	0.8405	0.6825	0.9396
GO_DNA_PACKAGING	1.8996	0	0.0074	1.9489	0	0.0043	2.0976	0	0.0006	1.9133	0	0.0079	2.0911	0	0.0012	1.6823	0.0134	0.0526	2.1255	0	0.0007
GO_CELLULAR_RESPONSE_TO_DNA_DAMAGE_STIMULUS	1.9772	0	0.0032	1.9466	0	0.0044	1.899	0	0.0077	2.0292	0	0.0025	1.8315	0	0.0192	1.8464	0	0.0141	2.0971	0	0.0011
GO_RNA_INTERFERENCE	2.0118	0	0.002	1.9465	0	0.0043	1.9341	0	0.0054	1.6748	0.0112	0.064	1.6126	0.0251	0.0911	1.87	0	0.0112	2.0253	0	0.0027
GO_PROTEIN_IMPORT_INTO_MITOCHONDRIAL_MATRIX	1.8797	0.002	0.0094	1.9461	0	0.0043	2.1394	0	0.0004	1.9438	0	0.0056	1.8617	0.0021	0.0148	1.8819	0.0041	0.01
GO_RRNA_MODIFICATION	1.9424	0.0019	0.0047	1.9441	0.0019	0.0044	1.9235	0.0057	0.0059	1.958	0.0017	0.0048	1.8377	0.0045	0.0185	1.9713	0	0.0036	1.7597	0.0112	0.0326
GO_MITOCHONDRIAL_RNA_PROCESSING	2.1368	0.0018	0.0003	1.9389	0	0.0047	2.1137	0	0.0005	1.9471	0	0.0054	2.0344	0	0.0024	2.0354	0	0.0016
GO_MITOTIC_SISTER_CHROMATID_COHESION	1.9643	0	0.0037	1.9371	0.0059	0.0048	1.6345	0.0277	0.0699	1.8659	0.0037	0.0131	1.9109	0	0.0092	1.8773	0	0.0103	2.122	0	0.0008
GO_TRNA_TRANSCRIPTION	1.9307	0	0.0052	1.9361	0	0.0049	1.9118	0.0039	0.0067	1.9239	0	0.0072	1.9082	0	0.0094	1.9433	0	0.0054	2.002	0	0.0034
GO_RECOMBINATIONAL_REPAIR	1.9768	0.0017	0.0032	1.9349	0	0.0049	1.4814	0.0554	0.1671	1.88	0	0.0112	1.84	0.0047	0.0183	1.9255	0	0.0067	2.1983	0	0.0002
GO_ENDONUCLEOLYTIC_CLEAVAGE_INVOLVED_IN_RRNA_PROCESSING	1.921	0	0.0059	1.934	0	0.0049	1.7132	0.0058	0.0415	1.7169	0.0097	0.0466	1.5892	0.0252	0.1035	1.8303	0.0055	0.0168	2.0171	0	0.0029
GO_POSITIVE_REGULATION_OF_GENE_EXPRESSION_EPIGENETIC	1.8874	0	0.0086	1.9331	0	0.0049	1.6315	0.0096	0.071	1.8258	0	0.0189	2.0878	0	0.0012	1.8642	0.0019	0.0121	2.1008	0	0.0011
GO_ERROR_PRONE_TRANSLESION_SYNTHESIS	1.7725	0.0039	0.0246	1.9331	0.0039	0.0049	1.8398	0.0039	0.0139	1.5756	0.0294	0.1166	2.1649	0	0.0006	1.5896	0.0289	0.0968	1.8573	0.0022	0.0144
GO_CHROMOSOME_ORGANIZATION_INVOLVED_IN_MEIOTIC_CELL_CYCLE	1.923	0.0019	0.0058	1.9315	0	0.005	1.6985	0.0059	0.0458	1.6351	0.0261	0.0844	1.8928	0.0021	0.0111	1.8776	0.0038	0.0104	1.9068	0	0.0087
GO_RNA_CAPPING	1.7501	0.0018	0.0288	1.929	0.0036	0.0051	1.7173	0.013	0.0402	1.9111	0.0018	0.008	1.696	0.0089	0.0547	1.7203	0.0136	0.0392	1.9672	0	0.005
GO_REGULATION_OF_DNA_REPAIR	1.9829	0	0.003	1.9265	0.0018	0.0052	1.6566	0.0113	0.0591	2.1208	0	0.0007	2.0032	0	0.003	1.9927	0	0.0027	2.1737	0	0.0004
GO_PROTEIN_DNA_COMPLEX_DISASSEMBLY	1.8142	0	0.0168	1.9254	0	0.0052	1.9289	0	0.0056	1.4309	0.0809	0.2478	1.9028	0	0.0099	1.8464	0.0019	0.0142	1.9865	0	0.0041
GO_INTRACELLULAR_PROTEIN_TRANSMEMBRANE_TRANSPORT	1.8308	0.0018	0.015	1.9246	0	0.0052	2.2175	0	0.0001	1.76	0.0018	0.033	1.7309	0.0067	0.0433	1.7983	0.0019	0.0222	0.6691	0.9023	1
GO_PROTEIN_CONTAINING_COMPLEX_LOCALIZATION	1.7889	0	0.021	1.9213	0	0.0054	2.0474	0	0.0014	1.3967	0.0233	0.2822	1.8594	0	0.0151	1.6492	0	0.0657	2.0036	0	0.0034
GO_NEGATIVE_REGULATION_OF_MRNA_PROCESSING	1.9131	0.002	0.0064	1.9197	0	0.0055	1.8919	0.0078	0.0083	1.8026	0.0096	0.0231	1.944	0	0.0067	1.8927	0.0038	0.0091	2.0812	0	0.0014
GO_POSITIVE_REGULATION_OF_DNA_TEMPLATED_TRANSCRIPTION_ELONGATION	2.0266	0	0.0017	1.9141	0.0018	0.0058	2.0426	0	0.0014	1.8539	0.0018	0.0146	2.1582	0	0.0006	1.9012	0.0019	0.0085	2.1436	0	0.0006
GO_CHROMATIN_ASSEMBLY_OR_DISASSEMBLY	1.8691	0	0.0104	1.9128	0	0.0059	1.9399	0	0.0051	1.7246	0.0017	0.0442	2.1356	0	0.0007	1.677	0.0018	0.0543	2.096	0	0.0011
GO_ORGANELLE_FISSION	1.8458	0	0.0133	1.911	0	0.006	1.4667	0.0052	0.1754	1.9853	0	0.004	1.5778	0.0027	0.1075	1.5511	0.0018	0.119	1.8812	0	0.0111
GO_REGULATION_OF_TRANSCRIPTION_BY_RNA_POLYMERASE_I	1.9337	0	0.0051	1.9059	0	0.0064	1.9765	0	0.0032	1.8195	0.0057	0.0199	2.1485	0	0.0007	1.9815	0.0019	0.0032	2.1313	0	0.0007
GO_CLEAVAGE_INVOLVED_IN_RRNA_PROCESSING	1.7606	0.0169	0.0267	1.905	0	0.0065	1.8567	0.0037	0.0118	1.8234	0	0.0192	1.4895	0.0571	0.1703	1.7244	0.0057	0.0383	1.9828	0.0067	0.0043
GO_POSTREPLICATION_REPAIR	1.6942	0.0037	0.0431	1.904	0.0037	0.0065	1.7508	0.0092	0.0312	1.8917	0	0.01	2.057	0	0.0019	1.5125	0.0464	0.1496	1.8546	0.0068	0.0146
GO_PROTEIN_LOCALIZATION_TO_CHROMOSOME	1.7258	0.0056	0.0344	1.9038	0.0019	0.0065	1.8725	0	0.01	1.8836	0	0.0108	1.8343	0	0.019	1.5709	0.0152	0.1072	1.9737	0.0024	0.0046
GO_MEIOSIS_I_CELL_CYCLE_PROCESS	1.7641	0.015	0.0262	1.9031	0.0039	0.0065	1.8866	0.002	0.0087	1.67	0.0174	0.0657	2.0198	0	0.0027	1.5632	0.0424	0.1109	1.7613	0.0108	0.0323
GO_AEROBIC_RESPIRATION	1.9738	0	0.0033	1.8999	0.0018	0.0067	2.0489	0	0.0014	1.2625	0.1307	0.4492	1.6531	0.0077	0.07	2.1196	0	0.0005
GO_POSITIVE_REGULATION_OF_MRNA_PROCESSING	1.9396	0	0.0047	1.8942	0	0.0073	1.6751	0.0199	0.0533	1.7752	0.0055	0.0289	1.8309	0.0021	0.0192	1.8781	0	0.0104	2.0904	0	0.0012
GO_TRNA_5_END_PROCESSING	1.7515	0.0102	0.0284	1.8924	0	0.0074	1.9011	0.002	0.0077	1.7499	0.0057	0.0362	1.576	0.0343	0.1082	1.6593	0.0213	0.0613	1.821	0.0022	0.0191
GO_TERMINATION_OF_RNA_POLYMERASE_I_TRANSCRIPTION	2.0284	0	0.0017	1.892	0.0038	0.0074	1.8462	0.0019	0.0131	1.8502	0.0036	0.0148	1.9153	0.0021	0.0089	1.9734	0	0.0036	2.1953	0	0.0003
GO_PROTEIN_TRANSMEMBRANE_TRANSPORT	1.8422	0	0.0138	1.8892	0	0.0076	2.2785	0	0	1.8255	0	0.0189	1.6649	0.0133	0.0663	1.8904	0.0019	0.0093	0.7069	0.8719	1
GO_DNA_BIOSYNTHETIC_PROCESS	1.8174	0	0.0165	1.8847	0	0.008	1.6799	0	0.0516	1.971	0	0.0042	1.95	0	0.0062	1.7641	0	0.0297	1.9706	0	0.0048
GO_CELLULAR_RESPIRATION	1.9524	0	0.0042	1.8811	0	0.0083	2.0388	0	0.0014	0.9836	0.5084	0.8362	1.8216	0.0027	0.0208	2.1294	0	0.0004
GO_POSITIVE_REGULATION_OF_DNA_METABOLIC_PROCESS	1.8731	0	0.0099	1.881	0.0037	0.0082	1.6073	0.0149	0.0824	1.961	0	0.0047	1.8715	0	0.0138	1.8065	0.0019	0.0208	1.898	0.0025	0.0095
GO_PROTEIN_INSERTION_INTO_MITOCHONDRIAL_MEMBRANE	1.9617	0.0019	0.0037	1.8782	0.0018	0.0085	1.729	0.0109	0.0367	1.729	0.0018	0.0429	1.6066	0.0198	0.0946	1.9452	0.004	0.0052	1.3373	0.1525	0.3031
GO_CHROMOSOME_CONDENSATION	1.8215	0.0074	0.0162	1.8732	0.0038	0.0091	1.7589	0.0057	0.0294	1.6886	0.0182	0.0576	1.5598	0.0357	0.1199	1.3524	0.1152	0.2955	1.9479	0	0.006
GO_TRANSCRIPTION_ELONGATION_FROM_RNA_POLYMERASE_I_PROMOTER	1.9726	0	0.0033	1.8706	0.0018	0.0093	1.8	0.0057	0.0207	1.9127	0.0019	0.0079	1.8619	0	0.0148	1.9132	0.0018	0.0075	2.1547	0	0.0005
GO_TRANSCRIPTION_INITIATION_FROM_RNA_POLYMERASE_I_PROMOTER	1.9445	0	0.0046	1.8679	0	0.0095	1.8518	0	0.0123	1.8533	0.0053	0.0146	1.9295	0.0021	0.0077	1.9442	0	0.0053	2.1388	0	0.0006
GO_CHROMOSOME_SEPARATION	1.9138	0.0018	0.0064	1.8678	0.0019	0.0094	1.9355	0.0019	0.0054	2.0619	0	0.0017	1.5794	0.0305	0.1074	1.603	0.0296	0.0897	2.0391	0	0.0023
GO_TRANSLOCATION_OF_MOLECULES_INTO_HOST	1.8656	0.002	0.0109	1.8569	0	0.0107	1.8823	0	0.0091	1.7053	0.0115	0.051	1.7378	0.002	0.0411	1.8197	0	0.0185	1.9527	0	0.0057
GO_SPLICEOSOMAL_TRI_SNRNP_COMPLEX_ASSEMBLY	1.876	0.0021	0.0097	1.8554	0	0.0108	1.6754	0.008	0.0533	1.8157	0.002	0.0205	1.7615	0.0042	0.0349	1.834	0.0039	0.0161	1.9779	0	0.0045
GO_CHROMATIN_DISASSEMBLY	1.8603	0.0055	0.0114	1.849	0.0038	0.0116	1.7259	0.0152	0.0373	1.5635	0.027	0.1257	1.9234	0.0021	0.0081	1.9144	0	0.0075	1.9403	0	0.0063
GO_NEGATIVE_REGULATION_OF_DNA_REPLICATION	1.6406	0.0296	0.0629	1.8471	0.0056	0.0118	1.8166	0.0039	0.0175	1.5981	0.0378	0.1051	1.6263	0.0273	0.0846	1.4399	0.081	0.2073	1.7775	0.013	0.0279
GO_REGULATION_OF_CHROMOSOME_SEGREGATION	1.8198	0.0038	0.0164	1.8462	0.0039	0.0119	1.6964	0.0093	0.0459	2.0367	0	0.0023	1.381	0.0814	0.2706	1.4765	0.0528	0.1761	2.0168	0	0.0029
GO_DNA_REPLICATION_INDEPENDENT_NUCLEOSOME_ORGANIZATION	1.832	0.0147	0.0149	1.8448	0.0041	0.0121	1.8122	0.002	0.0183	1.9155	0.0019	0.0079	1.7724	0.0064	0.032	1.6946	0.0118	0.0479	1.9758	0	0.0046
GO_ALTERNATIVE_MRNA_SPLICING_VIA_SPLICEOSOME	1.8173	0.0018	0.0164	1.8411	0.0019	0.0126	2.0161	0.0019	0.0019	1.8123	0.0018	0.0209	2.0063	0	0.0029	1.739	0.0093	0.0355	2.0311	0	0.0026
GO_MRNA_METHYLATION	1.8054	0.0019	0.0182	1.8398	0.0019	0.0127	1.8431	0.0019	0.0136	1.8503	0.002	0.0149	1.8499	0.0044	0.0166	1.8881	0.002	0.0094	1.758	0.0088	0.0329
GO_REGULATION_OF_TRANSCRIPTION_ELONGATION_FROM_RNA_POLYMERASE_II_PROMOTER	1.9646	0	0.0037	1.8362	0.0019	0.0132	1.9133	0.0018	0.0066	1.8473	0	0.015	2.1046	0	0.001	1.7855	0.0037	0.025	2.2061	0	0.0002
GO_CELL_CYCLE_CHECKPOINT	1.8471	0	0.0131	1.8348	0	0.0134	1.6223	0.0056	0.0747	1.8522	0	0.0147	1.5033	0.018	0.1615	1.6321	0.0054	0.073	2.0741	0	0.0015
GO_PROTEIN_LOCALIZATION_TO_CHROMATIN	1.7058	0.0155	0.0399	1.8339	0.0079	0.0135	1.8203	0.0019	0.0169	2.0413	0	0.0022	1.6755	0.0105	0.0629	1.7631	0.0019	0.0297	1.944	0.009	0.0062
GO_NUCLEOSOME_ORGANIZATION	1.8176	0.0019	0.0165	1.8302	0.0018	0.0139	2.1128	0	0.0005	1.5846	0.0129	0.1125	2.1379	0.0021	0.0007	1.6827	0.0119	0.0526	2.1059	0	0.001
GO_MITOCHONDRIAL_TRANSCRIPTION	1.6909	0.0078	0.0443	1.823	0	0.0151	1.7388	0.0099	0.0344	1.7341	0.0039	0.0415	1.7516	0.0042	0.0381	1.6772	0.0057	0.0544
GO_MATURATION_OF_5_8S_RRNA	1.8222	0.0019	0.0162	1.8225	0.0077	0.015	1.8582	0.0036	0.0117	1.7616	0.0019	0.0329	1.7271	0.0125	0.0447	1.5762	0.0331	0.1043	1.9575	0	0.0055
GO_PROTEIN_INSERTION_INTO_MEMBRANE	1.972	0	0.0034	1.8216	0.0019	0.0151	1.7076	0.0097	0.0434	1.717	0.009	0.0468	1.5888	0.0218	0.1034	2.0393	0	0.0016	1.3997	0.0901	0.2436
GO_ENDONUCLEOLYTIC_CLEAVAGE_IN_ITS1_TO_SEPARATE_SSU_RRNA_FROM_5_8S_RRNA_AND_LSU_RRNA_FROM_TRICISTRONIC_RRNA_TRANSCRIPT_SSU_RRNA_5_8S_RRNA_LSU_RRNA_	1.7948	0.0019	0.0199	1.821	0	0.0151	1.6722	0.0056	0.0543	1.6493	0.0112	0.0762	1.5298	0.041	0.1397	1.7644	0	0.0298	1.8963	0	0.0094
GO_THIOESTER_BIOSYNTHETIC_PROCESS	1.7826	0.0056	0.0222	1.821	0.0055	0.0151	1.8906	0.0018	0.0084	1.4858	0.0632	0.1898	1.763	0.0064	0.0347	1.8872	0	0.0094	1.0255	0.4419	0.6982
GO_DNA_SYNTHESIS_INVOLVED_IN_DNA_REPAIR	1.6781	0.0112	0.0484	1.8189	0.0037	0.0153	1.8293	0.0019	0.0156	1.9211	0.0019	0.0073	1.9896	0	0.0036	1.4886	0.0444	0.1677	1.8327	0.0212	0.0173
GO_TRNA_5_LEADER_REMOVAL	1.7565	0.0039	0.0276	1.8185	0.0019	0.0153	1.6684	0.0133	0.0557	1.8491	0.0018	0.0149	1.6728	0.0184	0.0633	1.7415	0.0039	0.0358	1.9171	0.0045	0.0078
GO_TRNA_THREONYLCARBAMOYLADENOSINE_METABOLIC_PROCESS	1.8639	0.0036	0.011	1.8181	0.0058	0.0153	1.7324	0.0094	0.0358	1.3622	0.1195	0.3212	1.6909	0.0205	0.0564	1.8201	0.0056	0.0185
GO_REGULATION_OF_SIGNAL_TRANSDUCTION_BY_P53_CLASS_MEDIATOR	1.7761	0.0018	0.0237	1.8175	0	0.0153	1.9305	0.0018	0.0055	1.7011	0.0017	0.0524	1.7363	0.0026	0.0415	1.7125	0	0.0414	2.0166	0	0.0029
GO_MEIOTIC_CELL_CYCLE	1.8184	0.0018	0.0166	1.8151	0.0019	0.0157	1.6799	0.0055	0.0518	1.9724	0	0.0042	1.7226	0.0042	0.0465	1.7261	0.0036	0.0384	1.9013	0	0.0092
GO_MATURATION_OF_5_8S_RRNA_FROM_TRICISTRONIC_RRNA_TRANSCRIPT_SSU_RRNA_5_8S_RRNA_LSU_RRNA_	1.7877	0.0019	0.0212	1.8136	0.0056	0.0159	1.8502	0.0059	0.0125	1.8024	0.0038	0.023	1.7402	0.0155	0.0403	1.6243	0.029	0.0776	2.004	0	0.0033
GO_REGULATION_OF_CELLULAR_RESPIRATION	1.8596	0.0055	0.0114	1.8103	0	0.0164	1.8601	0.0019	0.0116	1.6265	0.0192	0.0884	1.6729	0.0215	0.0635	1.7793	0.0117	0.0265
GO_NUCLEOTIDE_EXCISION_REPAIR	1.841	0.0037	0.0139	1.8096	0.0037	0.0164	1.7287	0	0.0366	1.4201	0.0492	0.2578	2.0303	0	0.0024	1.8031	0	0.0214	1.9245	0	0.0073
GO_CRISTAE_FORMATION	1.7462	0.0018	0.0294	1.8047	0.0019	0.0173	1.7332	0.0094	0.036	1.4429	0.0633	0.2359	1.816	0.0021	0.0216	1.8123	0.002	0.0199
GO_GPI_ANCHOR_BIOSYNTHETIC_PROCESS	1.9548	0	0.0041	1.8036	0.0056	0.0174	1.934	0.0018	0.0053	1.8077	0.0129	0.0217	1.7142	0.0101	0.0489	1.9353	0	0.0059	2.023	0	0.0028
GO_POSITIVE_REGULATION_OF_DNA_RECOMBINATION	1.8475	0.0036	0.0132	1.8026	0.0074	0.0175	1.5817	0.0314	0.0982	1.8291	0.0073	0.0182	1.8681	0	0.0142	1.7605	0.0099	0.0304	1.7826	0.009	0.0272
GO_HISTONE_MRNA_METABOLIC_PROCESS	1.7923	0.0019	0.0203	1.7991	0.0038	0.0181	1.5831	0.0446	0.0975	1.7038	0.0111	0.0515	1.6565	0.0234	0.0693	1.568	0.0524	0.1083	1.8858	0.0045	0.0106
GO_MITOCHONDRIAL_RESPIRATORY_CHAIN_COMPLEX_ASSEMBLY	1.7397	0.0018	0.0309	1.797	0.0019	0.0185	1.8552	0	0.012	-1.149	0.2332	0.5559	1.6269	0.0052	0.0846	1.9079	0	0.008
GO_NEGATIVE_REGULATION_OF_DNA_RECOMBINATION	1.6954	0.0093	0.043	1.7951	0.0037	0.0188	1.9282	0.0019	0.0056	1.5755	0.0369	0.1163	1.7056	0.0042	0.0514	1.6017	0.0279	0.0902	1.6755	0.0252	0.0606
GO_MITOTIC_CHROMOSOME_CONDENSATION	1.7699	0.0019	0.025	1.7931	0.002	0.019	1.6651	0.0058	0.0567	1.7259	0.004	0.0438	1.6211	0.0164	0.086	1.5677	0.0256	0.1078	1.8913	0	0.01
GO_NEGATIVE_REGULATION_OF_RNA_SPLICING	1.8142	0.0037	0.0169	1.7924	0.0036	0.0191	1.7779	0.0036	0.0251	1.3008	0.1581	0.4044	1.7471	0.0021	0.0385	1.745	0.0094	0.0346	1.9246	0	0.0073
GO_PSEUDOURIDINE_SYNTHESIS	1.8124	0.0037	0.017	1.792	0.0099	0.0191	1.9595	0	0.004	1.4863	0.0629	0.1898	1.6431	0.0174	0.0758	1.7399	0.013	0.0358	1.6131	0.0315	0.0865
GO_PROTEIN_METHYLATION	1.8406	0	0.0139	1.7904	0.0018	0.0193	1.7042	0.0054	0.0439	1.5678	0.0162	0.1227	1.6662	0.0048	0.0661	1.8089	0.0019	0.0204	2.0386	0	0.0023
GO_REGULATION_OF_MRNA_POLYADENYLATION	1.7607	0.0037	0.0268	1.7897	0.0076	0.0194	1.6981	0.0019	0.0456	1.5761	0.0312	0.1165	1.7098	0.0141	0.0502	1.7378	0.0078	0.0358	1.8585	0.0087	0.0142
GO_ENDONUCLEOLYTIC_CLEAVAGE_IN_5_ETS_OF_TRICISTRONIC_RRNA_TRANSCRIPT_SSU_RRNA_5_8S_RRNA_LSU_RRNA_	1.8273	0	0.0155	1.7875	0	0.0198	1.7022	0.0018	0.0445	1.6485	0.0176	0.0764	1.5531	0.0312	0.123	1.7825	0	0.0257	1.9447	0	0.0062
GO_CHROMATIN_ORGANIZATION_INVOLVED_IN_REGULATION_OF_TRANSCRIPTION	1.7381	0.0036	0.0313	1.787	0.0036	0.0198	1.7552	0.0018	0.0302	1.8482	0.0056	0.015	1.5963	0.0191	0.1001	1.6775	0.0125	0.0545	1.9631	0	0.0052
GO_RIBOSOMAL_LARGE_SUBUNIT_ASSEMBLY	1.7997	0.0018	0.0189	1.782	0.0038	0.0209	1.7404	0.0115	0.0342	1.4275	0.0912	0.2497	1.6979	0.0065	0.0542	1.7295	0.0079	0.0375	1.5887	0.0286	0.0985
GO_HISTONE_EXCHANGE	1.7526	0.0038	0.0284	1.7816	0.0058	0.0208	1.7331	0.01	0.0359	1.7819	0.0018	0.0275	2.0218	0	0.0026	1.6408	0.018	0.0692	1.9778	0.0022	0.0045
GO_NEGATIVE_REGULATION_OF_MRNA_SPLICING_VIA_SPLICEOSOME	1.7222	0.0181	0.0354	1.7802	0.0018	0.021	1.7548	0.0057	0.0302	1.6348	0.0246	0.0842	1.8163	0.0043	0.0217	1.7357	0.0077	0.036	1.8367	0.0023	0.0168
GO_MITOTIC_CELL_CYCLE_CHECKPOINT	1.7035	0.0037	0.0406	1.777	0	0.0216	1.5415	0.0111	0.1232	1.7713	0.0072	0.0299	1.3374	0.0604	0.3242	1.465	0.022	0.184	1.897	0	0.0095
GO_TRANSCRIPTION_COUPLED_NUCLEOTIDE_EXCISION_REPAIR	1.7492	0.0018	0.0289	1.7757	0	0.0218	1.6278	0.0055	0.0721	1.4111	0.0585	0.2687	2.0683	0	0.0015	1.6504	0.0095	0.0653	1.9954	0	0.0037
GO_NEGATIVE_REGULATION_OF_CHROMOSOME_ORGANIZATION	1.6571	0.0164	0.0554	1.7733	0.0019	0.0223	1.6128	0.025	0.0795	1.7982	0	0.0238	1.3258	0.1264	0.3394	1.439	0.0612	0.2079	1.8861	0	0.0106
GO_MITOCHONDRIAL_RNA_CATABOLIC_PROCESS	1.717	0.0101	0.0363	1.7723	0.0039	0.0224	1.8595	0	0.0116	1.4432	0.0966	0.2361	1.6047	0.025	0.0957	1.6661	0.0057	0.0583
GO_GENE_SILENCING_BY_RNA	1.663	0.0053	0.0529	1.7711	0.0018	0.0226	1.685	0.0019	0.0497	1.5619	0.0106	0.1268	1.6027	0.0089	0.0968	1.6384	0.0057	0.0699	1.739	0	0.0381
GO_MITOCHONDRION_LOCALIZATION	1.5222	0.0464	0.1348	1.7694	0.0092	0.0229	1.6251	0.0212	0.0734	1.718	0.0132	0.0467	1.8764	0	0.0132	1.5761	0.0375	0.104	1.3178	0.1563	0.3239
GO_TRANSCRIPTION_INITIATION_FROM_RNA_POLYMERASE_III_PROMOTER	1.7482	0.0138	0.0289	1.7676	0.0039	0.0233	1.8322	0.0039	0.0151	1.6895	0.0038	0.0573	1.7209	0.008	0.047	1.7749	0.002	0.0276	1.8266	0.0022	0.0184
GO_PROTEIN_IMPORT	1.8015	0.0018	0.0187	1.7662	0	0.0236	1.9354	0	0.0053	1.6833	0.0016	0.0599	1.6736	0	0.0637	1.9055	0	0.0081	1.4832	0.0187	0.1696
GO_POSITIVE_REGULATION_OF_DNA_REPAIR	1.8797	0.0019	0.0093	1.7655	0.0075	0.0236	1.4369	0.0775	0.1982	1.9625	0.0018	0.0046	1.7126	0.0085	0.0494	1.7578	0.0152	0.0307	2.0155	0.0022	0.0029
GO_ATTACHMENT_OF_GPI_ANCHOR_TO_PROTEIN	1.8027	0	0.0185	1.7587	0.0114	0.0254	1.762	0.004	0.0287	1.6585	0.008	0.0721	1.6681	0.0097	0.0653	1.8537	0	0.0131	1.9434	0	0.0062
GO_CHROMATIN_REMODELING_AT_CENTROMERE	1.7271	0.0095	0.0343	1.7517	0.0058	0.0272	1.7772	0.0058	0.025	1.7807	0.0054	0.0277	1.6643	0.0144	0.0663	1.6473	0.0185	0.0661	1.8405	0.0044	0.0163
GO_MITOCHONDRIAL_DNA_METABOLIC_PROCESS	1.7586	0.0081	0.0271	1.7513	0.0037	0.0272	1.5501	0.0348	0.1196	1.5828	0.0197	0.1139	1.8819	0	0.0124	1.72	0.0078	0.0392
GO_DNA_METHYLATION	1.7206	0.013	0.0358	1.7473	0.0093	0.0283	1.5887	0.0339	0.0943	1.7425	0.0078	0.0388	1.5997	0.037	0.0983	1.731	0.0056	0.0373	1.748	0.0047	0.0354
GO_POSITIVE_REGULATION_OF_MRNA_3_END_PROCESSING	1.8335	0.0058	0.0147	1.746	0.0058	0.0285	1.6085	0.0333	0.0818	1.8441	0.0018	0.0156	1.6612	0.0205	0.0674	1.7317	0.0038	0.0372	1.943	0	0.0062
GO_HISTONE_METHYLATION	1.8731	0	0.01	1.7446	0.0075	0.0288	1.8545	0.0018	0.012	1.8374	0.0037	0.0169	1.7516	0.0116	0.0379	1.863	0	0.0121	2.1463	0	0.0005
GO_ERROR_FREE_TRANSLESION_SYNTHESIS	1.5163	0.0399	0.1357	1.7392	0.0094	0.0302	1.7752	0.0019	0.0255	1.5564	0.0277	0.1311	2.0782	0	0.0013	1.3355	0.1606	0.3154	1.6266	0.0374	0.0813
GO_NEURON_MATURATION	1.6213	0.0301	0.0719	1.739	0.0197	0.0302	1.3433	0.145	0.2944	1.0266	0.4343	0.7911	1.5304	0.05	0.1396	1.709	0.0097	0.0427	1.255	0.1966	0.3887
GO_REGULATION_OF_DOUBLE_STRAND_BREAK_REPAIR_VIA_HOMOLOGOUS_RECOMBINATION	1.6669	0.013	0.0518	1.7374	0.0056	0.0305	1.4683	0.0856	0.1745	1.2061	0.2375	0.5364	1.655	0.0122	0.0696	1.5679	0.0466	0.1081	1.8344	0.0045	0.0171
GO_MATURATION_OF_LSU_RRNA	1.9068	0.0036	0.0069	1.7361	0.0075	0.0308	1.8105	0	0.0185	1.465	0.0758	0.2129	1.5632	0.0373	0.1177	1.7006	0.0133	0.0455	1.8433	0.0022	0.0159
GO_ACETYL_COA_BIOSYNTHETIC_PROCESS	1.6636	0.0225	0.0528	1.733	0.0074	0.0316	1.6921	0.0115	0.0471	1.3547	0.1181	0.3281	1.6871	0.0114	0.0583	1.7991	0.0061	0.0221
GO_RRNA_METHYLATION	1.8498	0.0058	0.0129	1.7329	0.0059	0.0314	1.6898	0.0188	0.0479	1.7054	0.0091	0.0512	1.7634	0.002	0.0347	1.7856	0.0036	0.0251
GO_DNA_LIGATION	1.5822	0.0244	0.0929	1.7289	0.0055	0.0326	1.9027	0	0.0075	1.9575	0.0036	0.0048	1.4651	0.0819	0.1916	1.6013	0.0304	0.0903	1.7517	0.0111	0.0346
GO_TRANSLESION_SYNTHESIS	1.5361	0.0447	0.1231	1.7265	0.0113	0.0333	1.7058	0.0077	0.0439	1.8631	0.0058	0.0135	1.8754	0	0.0133	1.3466	0.122	0.3021	1.6634	0.0187	0.0652
GO_CENTROMERE_COMPLEX_ASSEMBLY	1.6821	0.0146	0.0476	1.7254	0.0127	0.0335	1.6307	0.0195	0.0711	1.5574	0.0439	0.1305	1.642	0.0305	0.0763	1.5053	0.0478	0.1539	1.8568	0.0023	0.0144
GO_MITOCHONDRIAL_PROTEIN_PROCESSING	1.7179	0.0057	0.0362	1.7249	0.0021	0.0336	1.9207	0	0.0061	1.536	0.0408	0.1467	1.622	0.032	0.086	1.7287	0.0038	0.0376
GO_SIGNAL_TRANSDUCTION_BY_P53_CLASS_MEDIATOR	1.5958	0.0088	0.084	1.7246	0.0019	0.0335	1.7388	0	0.0346	1.6985	0.0017	0.0533	1.3889	0.0264	0.2669	1.5303	0.0129	0.1364	1.8231	0	0.0188
GO_NEGATIVE_REGULATION_OF_DNA_TEMPLATED_TRANSCRIPTION_ELONGATION	1.6719	0.0078	0.05	1.7244	0.0097	0.0334	1.5447	0.0318	0.1214	1.8131	0.0056	0.0208	1.5947	0.027	0.1009	1.5705	0.0244	0.1071	1.8202	0.0042	0.019
GO_INTERSTRAND_CROSS_LINK_REPAIR	1.4874	0.0642	0.1582	1.7226	0.0038	0.0339	1.4843	0.0696	0.1645	1.5088	0.0486	0.1694	1.6758	0.0183	0.063	1.2571	0.2041	0.4087	1.6145	0.0285	0.0859
GO_REGULATION_OF_DNA_RECOMBINATION	1.7633	0.0092	0.0263	1.7214	0.0038	0.0342	1.7327	0.006	0.0359	1.673	0.0124	0.0647	1.7509	0.0069	0.0379	1.6393	0.015	0.0698	1.6719	0.021	0.0617
GO_POSITIVE_REGULATION_OF_TRANSCRIPTION_BY_RNA_POLYMERASE_I	1.8053	0.0039	0.0181	1.7178	0.0095	0.0353	1.7884	0.0038	0.0229	1.887	0.0054	0.0105	2.0087	0	0.0029	1.7603	0.0059	0.0303	1.9221	0	0.0074
GO_NUCLEOSIDE_BISPHOSPHATE_METABOLIC_PROCESS	1.7145	0.0109	0.0372	1.7172	0.0054	0.0354	1.4323	0.0674	0.2023	0.8363	0.7204	1	1.5103	0.0364	0.1561	1.741	0.0037	0.0356	1.5162	0.0702	0.1444
GO_REGULATION_OF_CELL_CYCLE_CHECKPOINT	1.6899	0.0146	0.0446	1.7157	0.0096	0.0358	1.3794	0.117	0.2584	1.2747	0.1806	0.4359	1.58	0.0311	0.1071	1.3869	0.1069	0.2568	1.8202	0.0089	0.0191
GO_ACETYL_COA_BIOSYNTHETIC_PROCESS_FROM_PYRUVATE	1.5199	0.0499	0.135	1.7142	0.0155	0.0361	1.5993	0.0289	0.0874	1.3333	0.1552	0.3598	1.708	0.0147	0.0509	1.6684	0.0227	0.0575
GO_PROTEIN_INSERTION_INTO_MITOCHONDRIAL_INNER_MEMBRANE	1.7526	0.0037	0.0282	1.714	0.0036	0.036	1.7709	0	0.0265	1.632	0.0182	0.0857	1.6534	0.0101	0.07	1.7968	0	0.0224
GO_MRNA_CLEAVAGE_INVOLVED_IN_MRNA_PROCESSING	1.6712	0.0174	0.0501	1.7137	0.0055	0.036	1.6288	0.0245	0.0718	1.529	0.0605	0.1524	1.5317	0.0466	0.1388	1.6009	0.0246	0.0902	1.7827	0.0065	0.0273
GO_REGULATION_OF_RIBOSOME_BIOGENESIS	1.6046	0.0309	0.081	1.7131	0.0155	0.036	1.5765	0.0368	0.1017	1.7777	0.0074	0.0281	1.7493	0.0042	0.0382	1.6174	0.0155	0.0812	1.5078	0.0824	0.1493
GO_NEGATIVE_REGULATION_OF_GENE_EXPRESSION_EPIGENETIC	1.6667	0.0092	0.0517	1.7129	0.0018	0.0359	1.7835	0.0038	0.0239	1.9522	0	0.0051	1.6343	0.0095	0.0799	1.5246	0.0277	0.1398	1.8789	0.0047	0.0114
GO_POSITIVE_REGULATION_OF_NUCLEOBASE_CONTAINING_COMPOUND_METABOLIC_PROCESS	1.8183	0	0.0165	1.7126	0	0.0358	1.5468	0.0056	0.1204	1.9503	0	0.0051	1.7825	0	0.0293	1.8092	0	0.0204	1.9961	0	0.0037
GO_CELLULAR_COMPONENT_DISASSEMBLY	1.7087	0	0.039	1.7125	0	0.0357	1.8424	0	0.0136	1.4503	0.0081	0.2287	1.4407	0.0031	0.2153	1.6672	0	0.0579	-1.6049	0.0015	0.0735
GO_DNA_METHYLATION_OR_DEMETHYLATION	1.6958	0.0037	0.043	1.7123	0.015	0.0356	1.6973	0.0115	0.0458	1.8174	0.0072	0.0202	1.6733	0.0201	0.0636	1.726	0.0038	0.0383	1.7312	0.0195	0.0402
GO_TRANSCRIPTION_INITIATION_FROM_RNA_POLYMERASE_II_PROMOTER	1.678	0.0142	0.0483	1.7115	0.0019	0.0357	1.6657	0.0051	0.0566	1.8988	0	0.0092	1.1671	0.1843	0.536	1.4732	0.0344	0.1769	1.9422	0	0.0062
GO_NCRNA_3_END_PROCESSING	1.572	0.0346	0.0984	1.7088	0.0098	0.0366	1.8934	0.0039	0.0082	1.595	0.0344	0.1066	1.7186	0.0189	0.0473	1.6229	0.0197	0.0778	1.6664	0.0086	0.0642
GO_PEPTIDYL_LYSINE_ACETYLATION	1.7681	0	0.0253	1.7074	0.0092	0.0369	1.7665	0.0018	0.0276	1.7313	0.0036	0.0424	1.4204	0.052	0.2364	1.5253	0.0188	0.1396	1.9887	0	0.004
GO_REGULATION_OF_HISTONE_UBIQUITINATION	1.6037	0.0179	0.0811	1.707	0.0097	0.0369	1.251	0.2254	0.4005	1.3116	0.1388	0.39	1.735	0.0041	0.0418	1.5444	0.0283	0.1246	1.6852	0.0128	0.0566
GO_MITOCHONDRIAL_RNA_MODIFICATION	1.8385	0.0018	0.014	1.7053	0	0.0373	1.6414	0.033	0.0666	1.5996	0.025	0.1046	1.7745	0.0063	0.0315	1.7219	0.0021	0.0389
GO_POSITIVE_REGULATION_OF_DNA_REPLICATION	1.5889	0.0301	0.0883	1.7018	0.0039	0.0386	1.8242	0	0.0162	1.3567	0.1214	0.326	1.5789	0.0323	0.107	1.4859	0.0547	0.1702	1.5229	0.048	0.142
GO_DNA_MODIFICATION	1.8242	0.0018	0.0159	1.7006	0.0019	0.0388	1.7929	0.0018	0.0219	1.88	0.0034	0.0112	1.6086	0.022	0.0935	1.7414	0.0037	0.0356	1.5897	0.024	0.0981
GO_POSTTRANSCRIPTIONAL_REGULATION_OF_GENE_EXPRESSION	1.7324	0	0.0329	1.6978	0	0.0396	1.7485	0	0.0317	1.5949	0	0.1063	1.5003	0	0.1618	1.6751	0	0.055	1.6304	0	0.0799
GO_NEGATIVE_REGULATION_OF_DNA_REPAIR	1.5601	0.022	0.1055	1.6944	0.0057	0.0407	1.5492	0.0417	0.1192	1.708	0.0129	0.0502	1.7188	0.0082	0.0475	1.5895	0.0358	0.0966	1.7659	0.0045	0.031
GO_POSITIVE_REGULATION_OF_RNA_METABOLIC_PROCESS	1.5572	0.0263	0.1075	1.6936	0.0095	0.0408	1.5951	0.0167	0.0902	1.5908	0.0217	0.1082	1.75	0.0044	0.038	1.4711	0.041	0.1783	1.7333	0.0115	0.0397
GO_NEGATIVE_REGULATION_OF_CELL_CYCLE_ARREST	1.5994	0.0335	0.0827	1.6925	0.0076	0.0411	1.6439	0.0277	0.0654	1.5183	0.0457	0.161	1.5025	0.0645	0.1609	1.4761	0.068	0.1761	1.7638	0.0112	0.0316
GO_REGULATION_OF_ISOTYPE_SWITCHING	1.7029	0.0108	0.0407	1.6891	0.0363	0.0423	1.6639	0.0257	0.0563	1.8862	0.0019	0.0105	1.677	0.013	0.063	1.5926	0.0333	0.0952	1.5901	0.0403	0.0982
GO_REGULATION_OF_CHROMOSOME_ORGANIZATION	1.6829	0.0017	0.0474	1.689	0.0019	0.0422	1.4748	0.0089	0.1716	1.7617	0.0017	0.033	1.5562	0	0.121	1.4847	0.0108	0.1705	1.9367	0	0.0065
GO_HISTONE_H3_K4_METHYLATION	1.7028	0.0133	0.0406	1.6886	0.0124	0.0421	1.7943	0.0038	0.0217	1.4285	0.0884	0.2494	1.6915	0.0191	0.0564	1.6618	0.0171	0.0604	1.8539	0.0022	0.0146
GO_PEPTIDYL_LYSINE_METHYLATION	1.7547	0.0053	0.0279	1.6857	0.0166	0.0431	1.7919	0.0057	0.0221	1.7552	0.0019	0.0344	1.7642	0	0.0347	1.7371	0.0125	0.0359	1.9904	0	0.0039
GO_NEGATIVE_REGULATION_OF_RNA_METABOLIC_PROCESS	1.7783	0.0056	0.0232	1.6847	0.0211	0.0435	1.9	0.0018	0.0077	1.5482	0.0319	0.1363	1.6602	0.0065	0.0676	1.7696	0.0057	0.0287	1.9817	0.0022	0.0043
GO_EMBRYONIC_CLEAVAGE	1.7335	0.0019	0.0328	1.6805	0	0.045	1.3546	0.1274	0.2844	1.7747	0.002	0.0289	1.5072	0.0483	0.1583	1.7705	0	0.0288	1.7563	0.0022	0.0333
GO_PROTEIN_ACYLATION	1.6804	0.0055	0.048	1.6805	0	0.0449	1.7104	0.0036	0.0424	1.5563	0.0154	0.1304	1.556	0	0.1208	1.5116	0.0136	0.1495	1.94	0.0026	0.0063
GO_BETA_CATENIN_TCF_COMPLEX_ASSEMBLY	1.7705	0.0094	0.025	1.6793	0.0226	0.0451	1.695	0.0093	0.0464	1.2841	0.1686	0.4228	1.5475	0.0318	0.1271	1.6468	0.0197	0.0661	1.9529	0.0022	0.0057
GO_METAPHASE_ANAPHASE_TRANSITION_OF_CELL_CYCLE	1.6272	0.0295	0.069	1.6776	0.0255	0.0457	1.4082	0.0795	0.2249	1.8586	0.0038	0.0141	1.0055	0.4382	0.7678	1.1214	0.3276	0.6079	1.7931	0.0106	0.0248
GO_RESPIRATORY_CHAIN_COMPLEX_IV_ASSEMBLY	1.7641	0.0055	0.0263	1.6771	0.0205	0.0457	2.0192	0	0.0018	1.432	0.0725	0.2466	1.6553	0.0183	0.0697	1.8937	0.0057	0.009
GO_MITOCHONDRIAL_GENOME_MAINTENANCE	1.6783	0.0152	0.0485	1.6767	0.0132	0.0457	1.5474	0.0527	0.1203	1.8113	0.0019	0.021	1.8517	0.0061	0.0163	1.6717	0.0168	0.0564
GO_MITOCHONDRIAL_TRNA_PROCESSING	1.8206	0	0.0163	1.6742	0.0123	0.0466	1.7558	0.004	0.0301	1.6977	0.0181	0.0535	1.8048	0.002	0.0237	1.814	0.0058	0.0196
GO_NUCLEAR_TRANSCRIBED_MRNA_POLY_A_TAIL_SHORTENING	1.7025	0.0099	0.0405	1.6685	0.0097	0.0488	1.3374	0.1453	0.3012	1.6657	0.0151	0.0679	1.4228	0.0844	0.235	1.8013	0.0018	0.0217	1.6806	0.0113	0.0587
GO_IRON_SULFUR_CLUSTER_ASSEMBLY	1.6773	0.0128	0.0482	1.6667	0.0112	0.0495	1.5536	0.0458	0.117	1.4167	0.0815	0.2625	1.5494	0.0478	0.1256	1.7691	0.0112	0.0287	-0.998	0.4856	0.6339
GO_PRODUCTION_OF_SIRNA_INVOLVED_IN_RNA_INTERFERENCE	1.5963	0.0187	0.0839	1.666	0.0116	0.0496	1.4978	0.036	0.1542	1.3969	0.087	0.2826	1.2033	0.2519	0.4938	1.5106	0.0342	0.15
GO_AEROBIC_ELECTRON_TRANSPORT_CHAIN	1.6726	0.0128	0.0498	1.6651	0.0175	0.0499	1.6659	0.0198	0.0567	1.5214	0.0486	0.1585	1.441	0.0872	0.2156	1.7594	0.0059	0.0304
GO_DNA_GEOMETRIC_CHANGE	1.7454	0.0036	0.0295	1.6648	0.0092	0.0498	1.6573	0.0056	0.0589	1.5401	0.0178	0.1427	1.5834	0.0177	0.1056	1.7082	0.0056	0.0428	1.9109	0	0.0083
GO_POSITIVE_REGULATION_OF_RESPONSE_TO_DNA_DAMAGE_STIMULUS	1.8245	0	0.0159	1.6645	0.0147	0.0498	1.4371	0.0642	0.1985	1.8132	0.0055	0.021	1.5443	0.0417	0.1296	1.707	0.0113	0.043	1.9492	0	0.006
GO_IMMUNOGLOBULIN_PRODUCTION_INVOLVED_IN_IMMUNOGLOBULIN_MEDIATED_IMMUNE_RESPONSE	1.6679	0.0182	0.0515	1.6636	0.0215	0.05	1.7776	0.002	0.0251	1.9963	0	0.0037	1.7402	0.0022	0.0405	1.6858	0.0019	0.0512	1.5173	0.0513	0.1438
GO_PROTEIN_ACETYLATION	1.6727	0.0088	0.05	1.6623	0.0055	0.0504	1.6932	0.002	0.0468	1.65	0	0.0763	1.4077	0.0438	0.2505	1.4522	0.0319	0.1966	1.9519	0.0026	0.0057
GO_MITOTIC_NUCLEAR_DIVISION	1.7263	0	0.0344	1.6614	0.0053	0.0506	1.4423	0.0187	0.1952	1.8558	0	0.0144	1.2902	0.0856	0.3812	1.3875	0.0405	0.2571	1.9271	0	0.0071
GO_DNA_LIGATION_INVOLVED_IN_DNA_REPAIR	1.4765	0.0621	0.166	1.6591	0.0158	0.0515	1.7043	0.0019	0.0441	1.5959	0.0237	0.1062	1.5577	0.0289	0.121	1.3617	0.1302	0.2859	1.643	0.0264	0.0745
GO_POSITIVE_REGULATION_OF_RIBOSOME_BIOGENESIS	1.6067	0.0287	0.0799	1.6512	0.013	0.0551	1.4907	0.0386	0.1598	1.6355	0.0057	0.0844	1.8245	0	0.0203	1.603	0.02	0.09	1.6933	0.0172	0.0538
GO_NEGATIVE_REGULATION_OF_METAPHASE_ANAPHASE_TRANSITION_OF_CELL_CYCLE	1.6354	0.0196	0.0652	1.6504	0.0214	0.0553	1.4969	0.0639	0.1547	1.8567	0	0.0143	1.4244	0.0818	0.2341	1.4357	0.09	0.2111	1.7191	0.0128	0.0445
GO_SOMATIC_DIVERSIFICATION_OF_IMMUNE_RECEPTORS_VIA_GERMLINE_RECOMBINATION_WITHIN_A_SINGLE_LOCUS	1.7183	0.0056	0.0364	1.6502	0.0094	0.0552	1.8249	0.0038	0.0162	1.9801	0.0019	0.004	1.8386	0	0.0184	1.6935	0.0079	0.0482	1.5439	0.0418	0.1259
GO_TRANSCRIPTION_PREINITIATION_COMPLEX_ASSEMBLY	1.5752	0.0388	0.0965	1.6471	0.0187	0.0565	1.6983	0.0094	0.0457	1.6309	0.0267	0.0861	1.4858	0.061	0.1729	1.4601	0.0578	0.1884	1.7673	0.0184	0.0309
GO_REGULATION_OF_SISTER_CHROMATID_SEGREGATION	1.6302	0.0183	0.0677	1.6447	0.0303	0.0575	1.4775	0.0765	0.1696	1.9405	0	0.0059	1.1364	0.2762	0.5795	1.3918	0.0849	0.2545	1.8085	0.0112	0.0214
GO_BASE_EXCISION_REPAIR	1.5667	0.0356	0.1019	1.6438	0.0115	0.0577	1.5203	0.0375	0.1369	1.4304	0.0811	0.2478	1.8454	0.0022	0.0173	1.5598	0.0313	0.1129	1.2908	0.1629	0.3542
GO_MITOCHONDRION_MORPHOGENESIS	1.4916	0.0668	0.1561	1.6424	0.0207	0.0582	1.4295	0.088	0.2054	1.4254	0.0881	0.2522	1.5083	0.0547	0.1577	1.5801	0.0175	0.1015
GO_NEGATIVE_REGULATION_OF_CHROMOSOME_SEGREGATION	1.5979	0.0159	0.0832	1.6406	0.0173	0.0588	1.4942	0.0573	0.1565	1.8216	0.002	0.0195	1.4029	0.1163	0.2537	1.4335	0.0794	0.2128	1.7257	0.0085	0.0419
GO_NEGATIVE_REGULATION_OF_TRANSCRIPTION_ELONGATION_FROM_RNA_POLYMERASE_II_PROMOTER	1.6111	0.0112	0.0779	1.6341	0.0137	0.062	1.4623	0.0588	0.1785	1.6668	0.0056	0.0675	1.5661	0.0348	0.1157	1.4732	0.0641	0.1774	1.7062	0.0085	0.0484
GO_RNA_SPLICING_VIA_ENDONUCLEOLYTIC_CLEAVAGE_AND_LIGATION	1.5549	0.0285	0.109	1.6337	0.0219	0.062	1.5042	0.061	0.149	0.9905	0.4747	0.8257	1.2421	0.2146	0.4449	1.593	0.0274	0.0953	1.7156	0.0213	0.0457
GO_REGULATION_OF_DOUBLE_STRAND_BREAK_REPAIR	1.7608	0.0055	0.0269	1.6286	0.0129	0.0645	1.229	0.1925	0.4251	1.7798	0.0018	0.0277	1.6637	0.0253	0.0664	1.7241	0.0154	0.0382	1.8481	0.0067	0.0153
GO_ATTACHMENT_OF_SPINDLE_MICROTUBULES_TO_KINETOCHORE	1.3807	0.1136	0.2587	1.6285	0.0191	0.0643	1.4779	0.0803	0.1696	1.8318	0.0056	0.0178	1.3585	0.1201	0.2986	1.2381	0.2186	0.4323	1.5513	0.053	0.1218
GO_PROTON_TRANSPORTING_TWO_SECTOR_ATPASE_COMPLEX_ASSEMBLY	1.6951	0.0097	0.0429	1.6283	0.0116	0.0643	1.4886	0.0574	0.1613	1.5196	0.0527	0.1601	1.6221	0.0288	0.0863	1.6513	0.021	0.0651
GO_POSITIVE_REGULATION_OF_TRANSCRIPTION_ELONGATION_FROM_RNA_POLYMERASE_II_PROMOTER	1.6416	0.0176	0.0627	1.6275	0.0289	0.0645	1.6591	0.0229	0.0584	1.5298	0.0517	0.1519	2.0659	0	0.0015	1.5864	0.0436	0.0983	1.8491	0.0089	0.0152
GO_FEMALE_GAMETE_GENERATION	1.526	0.0464	0.132	1.6272	0.0134	0.0644	1.3178	0.1275	0.3235	1.6547	0.0149	0.0741	0.9487	0.5175	0.8397	1.3341	0.1019	0.3163	1.5607	0.0268	0.1162
GO_ESTABLISHMENT_OF_MITOCHONDRION_LOCALIZATION	1.6617	0.0188	0.0533	1.6238	0.0292	0.0661	1.4641	0.0846	0.177	1.6883	0.0125	0.0575	1.7876	0.0044	0.0281	1.7397	0.0038	0.0357	1.1272	0.3413	0.5634
GO_DETERMINATION_OF_ADULT_LIFESPAN	1.5525	0.0423	0.1104	1.6192	0.03	0.0684	1.6722	0.036	0.0541	1.4703	0.0542	0.2087	1.5566	0.0391	0.121	1.6342	0.0233	0.0719	1.5407	0.0469	0.1282
GO_THIOESTER_METABOLIC_PROCESS	1.6774	0.0143	0.0483	1.6191	0.011	0.0682	1.4736	0.0421	0.1724	0.8147	0.7347	1	1.5228	0.0455	0.1446	1.7182	0.0112	0.0393	1.4602	0.0927	0.1901
GO_REGULATION_OF_GENE_SILENCING	1.4889	0.0276	0.1571	1.6179	0.0018	0.0687	1.4866	0.0331	0.1625	1.5085	0.017	0.1687	1.4902	0.0341	0.1699	1.4713	0.0227	0.1786	1.7301	0.0078	0.0405
GO_REGULATION_OF_DNA_DIRECTED_DNA_POLYMERASE_ACTIVITY	1.5809	0.0247	0.0933	1.6153	0.0178	0.0701	1.4269	0.0899	0.2071	1.6864	0	0.0584	1.5577	0.0373	0.1214	1.4756	0.0578	0.1756	1.6731	0.0084	0.0613
GO_REGULATION_OF_NUCLEOBASE_CONTAINING_COMPOUND_TRANSPORT	1.5475	0.0449	0.1143	1.6146	0.0154	0.0702	1.6781	0.0214	0.0522	1.5781	0.0251	0.1158	1.6249	0.0266	0.0849	1.48	0.0793	0.1732	1.7081	0.0087	0.0478
GO_GERM_CELL_DEVELOPMENT	1.4895	0.0469	0.157	1.6123	0.0133	0.0713	1.3015	0.1092	0.3419	1.2208	0.1717	0.5122	1.2218	0.1782	0.4713	1.4336	0.0524	0.2132	1.3551	0.0644	0.2886
GO_CELLULAR_RESPONSE_TO_ESTRADIOL_STIMULUS	1.6246	0.0228	0.0704	1.6097	0.0295	0.0726	1.3519	0.1206	0.2865	1.4701	0.0539	0.2084	1.8194	0.0082	0.0211	1.5892	0.0351	0.0965	1.4198	0.119	0.2255
GO_REGULATION_OF_GLYCOPROTEIN_BIOSYNTHETIC_PROCESS	1.5163	0.053	0.1361	1.6067	0.0226	0.0741	0.7601	0.7863	1	1.0177	0.4424	0.797	1.4186	0.0928	0.2375	1.5295	0.0411	0.1367	1.5745	0.0328	0.1072
GO_CELLULAR_PROCESS_INVOLVED_IN_REPRODUCTION_IN_MULTICELLULAR_ORGANISM	1.4966	0.0275	0.152	1.6054	0.0125	0.0746	1.0819	0.3152	0.6588	1.3917	0.0624	0.2857	1.2251	0.1449	0.4673	1.4002	0.0514	0.2465	1.3389	0.0827	0.3028
GO_HOMOLOGOUS_CHROMOSOME_SEGREGATION	1.5983	0.0243	0.0832	1.6041	0.0399	0.0752	1.4418	0.0765	0.1944	1.5971	0.0258	0.1055	1.6825	0.0171	0.0605	1.3862	0.1063	0.2571	1.6363	0.0379	0.0772
GO_NEGATIVE_REGULATION_OF_MITOTIC_CELL_CYCLE	1.459	0.0191	0.1803	1.6007	0.0018	0.0771	1.3401	0.048	0.2976	1.5563	0.0084	0.1308	1.241	0.0789	0.4461	1.2362	0.0963	0.4335	1.5577	0.0114	0.1177
GO_RIBOSOME_DISASSEMBLY	1.494	0.0587	0.1539	1.6005	0.0331	0.077	1.4581	0.0669	0.1815	1.386	0.1123	0.2932	1.4013	0.1183	0.2553	1.4769	0.0612	0.1762
GO_NCRNA_EXPORT_FROM_NUCLEUS	1.3332	0.1262	0.3107	1.5986	0.0171	0.0779	1.4736	0.0506	0.172	1.1292	0.2797	0.6502	1.5567	0.0347	0.1214	1.2014	0.2347	0.4848	1.5325	0.0615	0.1346
GO_MAINTENANCE_OF_SISTER_CHROMATID_COHESION	1.519	0.0468	0.1347	1.5973	0.0107	0.0786	1.1668	0.3006	0.5168	1.7557	0.002	0.0344	1.4083	0.089	0.2504	1.476	0.0576	0.1757	1.6039	0.0279	0.0896
GO_TELOMERE_MAINTENANCE_VIA_TELOMERE_LENGTHENING	1.6514	0.0185	0.0582	1.5953	0.0226	0.0794	1.4705	0.0507	0.174	1.0821	0.3464	0.7139	1.64	0.0157	0.0772	1.5545	0.0345	0.1164	1.7802	0.0104	0.0276
GO_REGULATION_OF_RESPONSE_TO_DNA_DAMAGE_STIMULUS	1.6513	0.0018	0.058	1.5953	0.0126	0.0796	1.3703	0.0522	0.2689	1.5761	0.017	0.1169	1.6537	0.005	0.0702	1.6475	0.0038	0.0662	1.84	0	0.0163
GO_POSITIVE_REGULATION_OF_ISOTYPE_SWITCHING	1.6042	0.0366	0.081	1.5942	0.0316	0.0797	1.51	0.0522	0.1445	1.8184	0.0074	0.0201	1.6189	0.028	0.0867	1.4749	0.0693	0.1759	1.3888	0.1076	0.2544
GO_CALCIUM_IMPORT_INTO_THE_MITOCHONDRION	1.7453	0.0019	0.0294	1.5939	0.0234	0.0797	1.4889	0.0538	0.1614	1.3204	0.1748	0.3776	1.5021	0.0659	0.1608	1.7252	0.004	0.0382
GO_MAINTENANCE_OF_CELL_NUMBER	1.6026	0.016	0.0814	1.5933	0.0108	0.0799	1.4155	0.0521	0.2173	1.4517	0.0427	0.228	1.1058	0.3026	0.6283	1.6799	0.013	0.0536	1.8527	0.0023	0.0147
GO_TRNA_TRANSPORT	1.3859	0.1136	0.2566	1.5923	0.0439	0.0802	1.4701	0.0536	0.1739	1.111	0.341	0.6763	1.5864	0.0479	0.1044	1.3944	0.099	0.2519	1.5649	0.0385	0.1139
GO_REGULATION_OF_CHROMOSOME_SEPARATION	1.5635	0.0362	0.1035	1.5913	0.0302	0.0806	1.3972	0.0965	0.2362	1.8717	0	0.0123	1.0674	0.375	0.6791	1.2336	0.2054	0.4364	1.748	0.0187	0.0356
GO_FEMALE_MEIOTIC_NUCLEAR_DIVISION	1.6098	0.0254	0.0781	1.5855	0.0349	0.0842	1.1494	0.286	0.5429	1.7887	0.0038	0.0258	1.3055	0.1527	0.3651	1.3886	0.1155	0.2567	1.5914	0.0351	0.0975
GO_POSITIVE_REGULATION_OF_B_CELL_MEDIATED_IMMUNITY	1.6001	0.0215	0.0826	1.5851	0.0372	0.0842	1.5286	0.0352	0.1322	1.7961	0.0037	0.0242	1.5868	0.037	0.1044	1.5372	0.047	0.131	1.4053	0.1264	0.2382
GO_REGULATION_OF_SISTER_CHROMATID_COHESION	1.6747	0.0079	0.0492	1.5849	0.0346	0.0841	1.3759	0.1355	0.2624	1.4361	0.0663	0.2417	1.4544	0.0788	0.2011	1.649	0.0214	0.0656	1.7915	0.0044	0.0251
GO_REGULATION_OF_CELLULAR_AMIDE_METABOLIC_PROCESS	1.4702	0.0122	0.1709	1.5848	0.0018	0.0839	1.5868	0.0017	0.0954	1.5983	0	0.1052	1.2123	0.0761	0.4852	1.4436	0.0085	0.2035	1.0558	0.3092	0.6548
GO_ROOF_OF_MOUTH_DEVELOPMENT	1.5201	0.0483	0.1353	1.5806	0.0294	0.0865	1.4797	0.0667	0.1685	1.1716	0.2752	0.5956	1.5834	0.0327	0.1052	1.5094	0.0536	0.1509	1.7055	0.0175	0.0485
GO_NADH_DEHYDROGENASE_COMPLEX_ASSEMBLY	1.5547	0.0217	0.1089	1.5796	0.0109	0.0866	1.5817	0.0201	0.0979	-1.2616	0.1409	0.4451	1.3786	0.0694	0.2722	1.7195	0.0037	0.0391
GO_METHYLATION_DEPENDENT_CHROMATIN_SILENCING	1.4842	0.0826	0.1604	1.5796	0.0388	0.0869	1.6182	0.0356	0.0767	1.6147	0.031	0.0961	1.4727	0.0609	0.1853	1.5307	0.0525	0.1365	1.6274	0.0283	0.0815
GO_TELOMERASE_RNA_LOCALIZATION	1.4504	0.0793	0.1894	1.579	0.0246	0.0867	1.4873	0.0512	0.1622	1.1729	0.2838	0.5945	1.4645	0.0743	0.1907	1.5557	0.0375	0.1163	1.6039	0.0244	0.0898
GO_SOMATIC_RECOMBINATION_OF_IMMUNOGLOBULIN_GENE_SEGMENTS	1.7323	0.0054	0.0328	1.5733	0.0224	0.0904	1.7597	0.0094	0.0293	1.9898	0	0.0038	1.8151	0.0021	0.0217	1.7635	0.0056	0.0298	1.5511	0.0487	0.1216
GO_NCRNA_CATABOLIC_PROCESS	1.7182	0.0095	0.0363	1.5718	0.0268	0.0912	1.3452	0.1248	0.2926	1.5497	0.0412	0.1353	1.7443	0.0084	0.0391	1.6613	0.021	0.0604	1.688	0.0132	0.0557
GO_SNRNA_PROCESSING	1.5626	0.0326	0.1039	1.5715	0.0384	0.0911	1.6479	0.0133	0.0632	1.4532	0.0889	0.2264	1.7871	0.0063	0.0281	1.4294	0.0998	0.2171	1.7141	0.0178	0.0461
GO_HOMOLOGOUS_RECOMBINATION	1.4343	0.0668	0.2055	1.5698	0.0269	0.092	1.5379	0.0394	0.1253	1.5138	0.0419	0.1649	1.6999	0.0107	0.0534	1.2909	0.1663	0.3666	1.2698	0.2135	0.3742
GO_REGULATION_OF_TRANSLATIONAL_INITIATION	1.3623	0.0717	0.2787	1.5653	0.03	0.0949	1.1306	0.2528	0.5757	1.6239	0.0179	0.09	1.1323	0.2727	0.5849	1.4588	0.044	0.1893	1.4839	0.0528	0.1695
GO_REGULATION_OF_HELICASE_ACTIVITY	1.6153	0.0269	0.0753	1.5601	0.0399	0.0984	1.716	0.0114	0.0405	1.4971	0.0534	0.1792	1.5792	0.0407	0.1072	1.5816	0.0438	0.1011	1.7396	0.0109	0.038
GO_CYTOCHROME_COMPLEX_ASSEMBLY	1.6788	0.0147	0.0485	1.5569	0.0365	0.1006	1.9528	0.0019	0.0043	1.0356	0.4163	0.7806	1.456	0.0588	0.2002	1.674	0.0195	0.0553
GO_CELLULAR_PROTEIN_CONTAINING_COMPLEX_ASSEMBLY	1.5196	0	0.135	1.5556	0	0.1012	1.5345	0	0.1281	1.2944	0.0152	0.4108	1.2107	0.0376	0.4874	1.5255	0	0.1398	1.4341	0.0036	0.2123
GO_POSITIVE_REGULATION_OF_HELICASE_ACTIVITY	1.6003	0.0194	0.0827	1.553	0.0267	0.1029	1.774	0	0.0257	1.7309	0.0078	0.0424	1.6228	0.006	0.0862	1.5994	0.0099	0.0906	1.6542	0.0137	0.0693
GO_POSITIVE_REGULATION_OF_SYNAPSE_ASSEMBLY	1.4992	0.0453	0.1505	1.5515	0.0417	0.1038	1.3474	0.1355	0.2918	1.5402	0.0387	0.1431	1.2977	0.1892	0.3724	1.5144	0.05	0.148	1.5464	0.0546	0.1246
GO_EMBRYONIC_SKELETAL_SYSTEM_MORPHOGENESIS	1.4724	0.0636	0.1689	1.5494	0.0229	0.1052	1.4348	0.0777	0.1998	1.2124	0.2471	0.5261	1.7579	0.0039	0.0359	1.6392	0.0234	0.0696	1.6263	0.0319	0.0812
GO_OUTER_MITOCHONDRIAL_MEMBRANE_ORGANIZATION	1.7333	0.0039	0.0328	1.5466	0.038	0.1071	1.6165	0.0167	0.0776	1.3117	0.1506	0.3906	1.6761	0.0062	0.0631	1.6982	0.0057	0.0463
GO_GLUTAMINE_FAMILY_AMINO_ACID_BIOSYNTHETIC_PROCESS	1.4991	0.0522	0.1497	1.5457	0.0459	0.1074	1.3062	0.1637	0.3373	1.2916	0.1968	0.4141	1.503	0.0667	0.1613	1.4676	0.0657	0.1814
GO_ENERGY_DERIVATION_BY_OXIDATION_OF_ORGANIC_COMPOUNDS	1.6213	0.0034	0.0721	1.5444	0.0056	0.1081	1.571	0.0053	0.1047	0.8798	0.7512	0.9756	1.4713	0.0056	0.1865	1.7698	0	0.0288	-0.6989	0.8946	0.9558
GO_GLYCOLIPID_BIOSYNTHETIC_PROCESS	1.8101	0.0038	0.0174	1.5415	0.0355	0.1102	1.7052	0.0229	0.0439	1.6902	0.0169	0.0572	1.4648	0.0688	0.1914	1.8938	0.0036	0.0091	1.878	0.0022	0.0115
GO_PROTEIN_SUMOYLATION	1.3326	0.1073	0.3111	1.5397	0.0367	0.1113	1.7033	0.0059	0.0442	0.977	0.4826	0.8442	1.6383	0.0156	0.078	1.3153	0.1365	0.3367	1.6474	0.0246	0.0727
GO_REGULATION_OF_TRANSLATIONAL_FIDELITY	1.6427	0.0267	0.0623	1.5391	0.0432	0.1115	1.5401	0.0402	0.1241	1.1065	0.3291	0.684	1.2819	0.1793	0.3915	1.6127	0.0273	0.0841	1.3505	0.153	0.2939
GO_NON_RECOMBINATIONAL_REPAIR	1.7131	0.0038	0.0375	1.5382	0.0353	0.1119	1.2558	0.1639	0.3937	1.9294	0	0.0067	1.4758	0.0571	0.1827	1.7479	0.0077	0.0338	1.7819	0.0073	0.0272
GO_SOMATIC_DIVERSIFICATION_OF_IMMUNE_RECEPTORS	1.5811	0.0365	0.0934	1.5366	0.0353	0.1129	1.6344	0.0338	0.0697	1.9722	0	0.0042	1.6255	0.023	0.0848	1.6005	0.0263	0.0902	1.3583	0.0994	0.2855
GO_DESMOSOME_ORGANIZATION	1.3878	0.1091	0.2551	1.5357	0.0316	0.1133	1.5091	0.0436	0.1445	-1.2639	0.195	0.4434	1.1117	0.3467	0.6183	1.404	0.1029	0.2435	1.519	0.0549	0.1442
GO_MITOCHONDRIAL_ELECTRON_TRANSPORT_UBIQUINOL_TO_CYTOCHROME_C	1.6099	0.0292	0.0784	1.535	0.0382	0.1136	1.5222	0.0481	0.1355	1.2736	0.2008	0.4348	1.5354	0.0473	0.1371	1.7366	0.0058	0.0359
GO_RIBONUCLEOPROTEIN_COMPLEX_DISASSEMBLY	1.4829	0.0619	0.1604	1.5348	0.0497	0.1134	1.5703	0.0335	0.1049	1.3822	0.1148	0.298	1.3893	0.1197	0.2678	1.5004	0.0594	0.1582
GO_POSITIVE_REGULATION_OF_TELOMERASE_RNA_LOCALIZATION_TO_CAJAL_BODY	1.3232	0.1626	0.3248	1.532	0.05	0.1153	1.3515	0.1231	0.2866	0.8326	0.6772	1	1.3082	0.1602	0.3626	1.4148	0.1055	0.2311	1.4735	0.0702	0.1779
GO_MITOCHONDRIAL_RESPIRATORY_CHAIN_COMPLEX_IV_ASSEMBLY	1.6296	0.0232	0.0678	1.5313	0.047	0.1156	1.8716	0.0019	0.0101	1.4957	0.0649	0.1803	1.5945	0.0166	0.1007	1.7195	0.0179	0.039
GO_POSITIVE_REGULATION_OF_VIRAL_TRANSCRIPTION	1.4806	0.0603	0.1625	1.5229	0.0528	0.1225	1.6637	0.0232	0.0562	1.5612	0.0278	0.1271	1.581	0.0404	0.1068	1.5258	0.0309	0.14	1.6211	0.0338	0.0834
GO_NEGATIVE_REGULATION_OF_CELL_CYCLE	1.4664	0.0103	0.1742	1.5199	0.0036	0.1247	1.3031	0.0429	0.3404	1.6129	0	0.0968	1.2563	0.0449	0.43	1.2684	0.0556	0.393	1.6164	0	0.0851
GO_DNA_DEPENDENT_DNA_REPLICATION_MAINTENANCE_OF_FIDELITY	1.3316	0.1473	0.312	1.5153	0.0519	0.1286	1.4998	0.0556	0.153	1.6106	0.0183	0.098	1.3272	0.1505	0.3378	1.3479	0.1348	0.3007	1.4555	0.1004	0.1945
GO_REGULATION_OF_METHYLATION_DEPENDENT_CHROMATIN_SILENCING	1.6355	0.0095	0.0654	1.514	0.0476	0.1294	1.4421	0.0807	0.1945	1.7431	0.0019	0.0387	1.4914	0.0579	0.1692	1.5802	0.0213	0.1018	1.6893	0.0131	0.0554
GO_PROTEIN_INSERTION_INTO_MITOCHONDRIAL_OUTER_MEMBRANE	1.7492	0	0.0287	1.5123	0.0392	0.1306	1.6642	0.0121	0.0566	1.2848	0.1805	0.423	1.6597	0.0061	0.0677	1.6926	0.002	0.0484
GO_RESPONSE_TO_ANTINEOPLASTIC_AGENT	1.3554	0.093	0.2849	1.5114	0.0279	0.1311	1.3626	0.0801	0.2759	1.0165	0.4071	0.7954	1.5	0.0267	0.1616	1.4049	0.0502	0.2434	1.4603	0.0472	0.1906
GO_PRIMARY_MIRNA_PROCESSING	1.5192	0.0418	0.135	1.5088	0.047	0.1331	1.5291	0.0508	0.1322	1.2122	0.2444	0.5248	1.3803	0.1155	0.2705	1.6098	0.0299	0.0854	1.3753	0.1272	0.2691
GO_POSITIVE_REGULATION_OF_METHYLATION_DEPENDENT_CHROMATIN_SILENCING	1.6328	0.0102	0.0665	1.5069	0.046	0.1345	1.4429	0.0809	0.195	1.7826	0.0057	0.0274	1.4816	0.0602	0.1773	1.6227	0.0155	0.0777	1.7107	0.0108	0.0471
GO_MRNA_SPLICE_SITE_SELECTION	1.4343	0.0886	0.205	1.5058	0.0426	0.1352	1.6319	0.0169	0.0709	1.6494	0.0171	0.0765	1.5964	0.0347	0.1004	1.4936	0.052	0.1647	1.6167	0.0311	0.0852
GO_MEMBRANE_LIPID_BIOSYNTHETIC_PROCESS	1.6387	0.0055	0.0638	1.504	0.0311	0.1365	1.6814	0.0072	0.0513	1.2469	0.1475	0.4722	1.7005	0.0048	0.0533	1.7547	0	0.0315	1.6736	0.0049	0.0613
GO_GLUTAMINE_METABOLIC_PROCESS	1.41	0.1044	0.2321	1.5027	0.0645	0.1374	0.9451	0.5107	0.8758	1.2253	0.2359	0.506	1.3975	0.1098	0.2588	1.2151	0.233	0.4629	1.1669	0.281	0.5061
GO_REGULATION_OF_CHROMATIN_ORGANIZATION	1.5205	0.0228	0.1352	1.5001	0.0198	0.1396	1.45	0.03	0.1894	1.4579	0.0365	0.2211	1.6021	0.0045	0.0969	1.3491	0.0596	0.3002	1.7797	0	0.0276
GO_SULFUR_COMPOUND_TRANSPORT	1.3836	0.1213	0.2576	1.4975	0.0464	0.1416	1.2977	0.1412	0.3463	1.1857	0.2603	0.5694	1.3226	0.1564	0.3428	1.3286	0.1423	0.3205	1.2801	0.1917	0.3639
GO_POSITIVE_REGULATION_OF_CHROMATIN_ORGANIZATION	1.474	0.0524	0.1684	1.4963	0.0389	0.1424	1.4585	0.0536	0.1815	1.4058	0.0728	0.2749	1.4691	0.0427	0.1886	1.358	0.0942	0.2899	1.6442	0.022	0.0743
GO_NEGATIVE_REGULATION_OF_RNA_CATABOLIC_PROCESS	1.6811	0.0095	0.0478	1.4954	0.0424	0.1429	1.5425	0.0421	0.123	1.556	0.032	0.1298	1.93	0	0.0077	1.6537	0.0115	0.0639	1.5031	0.0526	0.1533
GO_CHROMATIN_ASSEMBLY	1.4677	0.0469	0.1732	1.4817	0.0434	0.1563	1.611	0.0114	0.0805	1.3059	0.1332	0.3982	1.4914	0.0405	0.1696	1.1756	0.238	0.5254	1.6592	0.0049	0.0674
GO_IMPORT_INTO_NUCLEUS	1.4856	0.0261	0.1597	1.4813	0.0174	0.1563	1.5721	0.0185	0.1046	1.4667	0.0353	0.2118	1.5391	0.0127	0.1339	1.4022	0.0525	0.2443	1.7124	0	0.0466
GO_DNA_INTEGRITY_CHECKPOINT	1.4949	0.0295	0.1533	1.4791	0.0292	0.1582	1.4789	0.0297	0.169	1.6045	0.0104	0.1027	1.1677	0.2264	0.5375	1.3779	0.0549	0.2668	1.759	0.0046	0.0327
GO_OXIDATIVE_PHOSPHORYLATION	1.578	0.0091	0.0951	1.4788	0.0212	0.158	1.6196	0.0036	0.0761	-1.1472	0.215	0.5569	1.3017	0.0841	0.3685	1.6566	0.0074	0.0625
GO_NEGATIVE_REGULATION_OF_BIOSYNTHETIC_PROCESS	1.5211	0	0.1351	1.4754	0	0.161	1.4945	0.0016	0.1567	1.6545	0	0.074	1.3893	0	0.2671	1.4414	0.0017	0.2059	1.8051	0	0.022
GO_MULTICELLULAR_ORGANISM_AGING	1.3947	0.1061	0.2477	1.4753	0.0563	0.1606	1.5238	0.0619	0.1355	1.2666	0.1996	0.4436	1.4321	0.0796	0.2256	1.5669	0.0313	0.1081	1.6434	0.0169	0.0746
GO_POSITIVE_REGULATION_OF_PROTEIN_IMPORT	1.5668	0.0436	0.1022	1.4749	0.0603	0.1607	1.4511	0.0636	0.1887	1.3933	0.1046	0.2858	1.351	0.0995	0.3067	1.5723	0.03	0.1063	1.734	0.0119	0.0396
GO_DNA_UNWINDING_INVOLVED_IN_DNA_REPLICATION	1.4633	0.0703	0.1769	1.4725	0.0468	0.1627	1.3622	0.1472	0.2754	1.0818	0.3786	0.7128	1.6212	0.0134	0.0863	1.3964	0.0977	0.2501	1.5154	0.0705	0.1446
GO_DNA_TOPOLOGICAL_CHANGE	1.3904	0.1009	0.2521	1.4713	0.0672	0.1635	1.4186	0.093	0.2152	1.407	0.101	0.2742	1.2507	0.2209	0.433	1.3401	0.1548	0.3093	1.4461	0.0987	0.2016
GO_HISTONE_H4_ACETYLATION	1.4435	0.0693	0.1953	1.4687	0.0574	0.166	1.4042	0.0902	0.2288	1.2942	0.1501	0.4103	1.4147	0.0758	0.2423	1.2438	0.1641	0.4258	1.6591	0.0256	0.0671
GO_RNA_DEPENDENT_DNA_BIOSYNTHETIC_PROCESS	1.2977	0.1507	0.3576	1.468	0.0471	0.1662	1.3734	0.0789	0.2655	0.8512	0.6698	0.9976	1.4657	0.0575	0.1914	1.2664	0.1607	0.3961	1.4352	0.0727	0.2117
GO_PROTEIN_LOCALIZATION_TO_CHROMOSOME_TELOMERIC_REGION	0.9351	0.5493	0.8745	1.468	0.0698	0.1658	1.1727	0.2605	0.5084	0.682	0.8363	1	1.2043	0.2611	0.4926	0.772	0.7348	0.9844	0.982	0.4807	0.7673
GO_PYRIMIDINE_NUCLEOTIDE_CATABOLIC_PROCESS	1.423	0.1034	0.2181	1.4653	0.0889	0.1685	1.3351	0.1456	0.3041	1.3109	0.1794	0.3905	1.4256	0.092	0.2337	1.4511	0.0749	0.1964
GO_LUNG_MORPHOGENESIS	1.1341	0.3013	0.5934	1.4639	0.0619	0.1696	1.3451	0.1349	0.2922	1.424	0.0954	0.2525	1.2585	0.1695	0.4267	1.239	0.1996	0.4312	1.272	0.1762	0.3739
GO_CELL_DIVISION	1.4209	0.0142	0.2202	1.4637	0.0103	0.1694	1.3624	0.014	0.2757	1.4472	0.0045	0.2319	1.0965	0.2143	0.6434	1.1413	0.1696	0.5801	1.7083	0	0.048
GO_2_OXOGLUTARATE_METABOLIC_PROCESS	1.3417	0.1305	0.3009	1.4618	0.0744	0.1711	1.52	0.0554	0.1368	0.6282	0.9414	1	1.5858	0.0213	0.1044	1.5092	0.0446	0.1506
GO_EMBRYONIC_DIGIT_MORPHOGENESIS	1.4025	0.0877	0.2401	1.4563	0.0692	0.177	1.4707	0.0727	0.1742	1.5508	0.0363	0.1345	1.3888	0.105	0.2659	1.4622	0.0821	0.1863	1.6872	0.0262	0.0559
GO_CHAPERONE_MEDIATED_PROTEIN_TRANSPORT	1.564	0.052	0.1034	1.4552	0.0706	0.1774	1.7301	0.0081	0.0364	1.445	0.0916	0.2341	0.9517	0.5069	0.8352	1.5905	0.0271	0.0966
GO_NUCLEOSIDE_BISPHOSPHATE_BIOSYNTHETIC_PROCESS	1.3979	0.0734	0.2448	1.4552	0.0478	0.1778	1.6244	0.0099	0.0736	1.106	0.3269	0.6834	1.3225	0.1038	0.3422	1.5547	0.0203	0.1167	-0.4126	1	0.9993
GO_DEMETHYLATION	1.5249	0.0455	0.1327	1.4528	0.06	0.1795	1.6943	0.0174	0.0465	1.4599	0.0783	0.2195	1.7059	0.0183	0.0516	1.4387	0.0784	0.2077	1.6569	0.0336	0.068
GO_BRANCHED_CHAIN_AMINO_ACID_CATABOLIC_PROCESS	1.5003	0.0392	0.1498	1.4511	0.0753	0.1809	1.6641	0.0195	0.0564	0.7471	0.8256	1	1.6661	0.0352	0.0659	1.6234	0.013	0.0778
GO_CELL_CYCLE_PROCESS	1.3819	0.0016	0.2582	1.4468	0	0.1854	1.4053	0.005	0.2284	1.5807	0	0.1146	1.2284	0.0255	0.4633	1.1435	0.1224	0.5779	1.637	0	0.0771
GO_NEGATIVE_REGULATION_OF_RNA_BIOSYNTHETIC_PROCESS	1.5371	0.0016	0.123	1.4465	0.0033	0.1853	1.5106	0	0.1448	1.7417	0	0.039	1.4011	0.0032	0.255	1.4819	0.0033	0.1721	1.8261	0	0.0184
GO_CENTROMERIC_SISTER_CHROMATID_COHESION	1.5173	0.0431	0.136	1.4415	0.0613	0.1906	1.3666	0.1165	0.2721	1.0812	0.3852	0.7125	1.4256	0.0792	0.2331	1.3884	0.105	0.2564	1.594	0.0331	0.096
GO_REGULATION_OF_DNA_METHYLATION	1.4181	0.0849	0.2228	1.4408	0.0915	0.1909	0.9528	0.505	0.8736	1.0601	0.3933	0.7452	1.5229	0.0437	0.1449	1.417	0.0734	0.2291	1.6081	0.0328	0.0883
GO_SNRNA_3_END_PROCESSING	1.4915	0.0494	0.1557	1.44	0.1029	0.1914	1.5094	0.052	0.1446	1.3961	0.1113	0.2826	1.5765	0.0286	0.1081	1.3793	0.1206	0.2654	1.6211	0.0275	0.0831
GO_RIBOSE_PHOSPHATE_BIOSYNTHETIC_PROCESS	1.4597	0.0249	0.1805	1.4376	0.0424	0.1938	1.5223	0.011	0.1361	1.2307	0.1543	0.4986	1.1791	0.1791	0.5205	1.6699	0.0072	0.057	0.8397	0.7536	0.9389
GO_PYRUVATE_METABOLIC_PROCESS	1.3113	0.1494	0.3389	1.4375	0.082	0.1934	1.6648	0.0111	0.0566	0.7905	0.7235	1	1.2355	0.1931	0.4537	1.2991	0.1593	0.3565
GO_POSITIVE_REGULATION_OF_MRNA_SPLICING_VIA_SPLICEOSOME	1.5145	0.0419	0.1371	1.436	0.0632	0.1947	1.2883	0.1745	0.3585	1.3309	0.1377	0.3622	1.3857	0.0974	0.2677	1.4851	0.0587	0.1706
GO_DNA_REPLICATION_DEPENDENT_NUCLEOSOME_ORGANIZATION	1.473	0.0658	0.1686	1.4347	0.0709	0.1957	1.5641	0.0347	0.1095	1.6043	0.0152	0.1025	1.386	0.1	0.268	1.229	0.2111	0.4429	1.5748	0.0328	0.1073
GO_EMBRYONIC_CRANIAL_SKELETON_MORPHOGENESIS	1.2791	0.1869	0.3831	1.4339	0.097	0.1963	1.1863	0.251	0.4878	1.4364	0.0942	0.2419	1.3965	0.1191	0.2598	1.2699	0.1881	0.3916	1.3999	0.1185	0.244
GO_NEGATIVE_REGULATION_OF_DNA_DEPENDENT_DNA_REPLICATION	1.1901	0.2563	0.5032	1.4337	0.071	0.196	1.5501	0.0343	0.1189	1.4246	0.0935	0.2528	1.251	0.2059	0.4332	1.0639	0.3988	0.6867	1.2945	0.1685	0.3513
GO_SYNAPSIS	1.4198	0.1	0.2211	1.4305	0.0803	0.1993	1.4226	0.0983	0.2117	1.4891	0.0534	0.1872	1.7467	0.0021	0.0385	1.4691	0.0575	0.1802
GO_MATURATION_OF_LSU_RRNA_FROM_TRICISTRONIC_RRNA_TRANSCRIPT_SSU_RRNA_5_8S_RRNA_LSU_RRNA_	1.5213	0.046	0.1354	1.4304	0.0884	0.199	1.527	0.0428	0.1333	1.1865	0.2741	0.5684	1.3042	0.1621	0.3665	1.3893	0.0954	0.2576	1.6371	0.0277	0.0773
GO_KINETOCHORE_ORGANIZATION	1.2394	0.2125	0.4277	1.43	0.0796	0.199	0.9356	0.5455	0.8862	1.258	0.208	0.4543	1.263	0.1946	0.4197	1.0122	0.4507	0.7701	1.3524	0.154	0.2918
GO_REGULATION_OF_CELLULAR_RESPONSE_TO_HEAT	1.4165	0.0682	0.2244	1.4268	0.0484	0.2024	1.341	0.1031	0.2968	0.791	0.7887	1	1.0964	0.2969	0.6426	1.4045	0.0577	0.2434	1.6082	0.0076	0.0886
GO_CELLULAR_RESPONSE_TO_HEAT	1.4992	0.0272	0.1501	1.4258	0.0393	0.203	1.4295	0.0342	0.205	1.1379	0.2467	0.6405	1.2879	0.0874	0.383	1.4188	0.0393	0.2278	1.6048	0.005	0.0895
GO_POSITIVE_REGULATION_OF_TELOMERASE_ACTIVITY	1.5085	0.0481	0.1425	1.4245	0.0795	0.2041	1.3871	0.1054	0.2485	1.1711	0.25	0.5959	1.7486	0.0138	0.0382	1.493	0.0509	0.1649	1.6178	0.0323	0.0849
GO_INTRACILIARY_TRANSPORT_INVOLVED_IN_CILIUM_ASSEMBLY	1.3188	0.1536	0.3301	1.4244	0.0904	0.2039	1.2717	0.1865	0.3749	-0.5974	0.9489	0.9989	1.5699	0.0445	0.1129	1.3325	0.1278	0.3154	1.4263	0.1007	0.2187
GO_HISTONE_UBIQUITINATION	1.5747	0.0246	0.0966	1.4228	0.071	0.2052	1.3972	0.1065	0.2357	1.5142	0.0329	0.1649	1.6344	0.0184	0.0802	1.4512	0.0626	0.1973	1.8083	0	0.0213
GO_RIBOSOMAL_SMALL_SUBUNIT_ASSEMBLY	1.441	0.094	0.1978	1.4204	0.0871	0.2078	1.4552	0.0798	0.1843	1.4877	0.0701	0.1884	1.5052	0.061	0.16	1.3325	0.1451	0.3167	0.7945	0.7382	0.9664
GO_REGULATION_OF_TELOMERASE_ACTIVITY	1.4545	0.0585	0.185	1.4203	0.0787	0.2073	1.2546	0.1736	0.3952	1.2791	0.1587	0.4294	1.621	0.015	0.0857	1.464	0.0724	0.1845	1.5758	0.0118	0.1069
GO_HISTONE_DEUBIQUITINATION	1.5031	0.0471	0.1474	1.4171	0.0918	0.2108	1.4421	0.0557	0.195	1.5418	0.026	0.1419	1.1979	0.2495	0.4981	1.5746	0.0213	0.1049	1.6093	0.0198	0.0881
GO_REGULATION_OF_DNA_BIOSYNTHETIC_PROCESS	1.3533	0.0914	0.287	1.4151	0.0693	0.2128	1.0566	0.3578	0.6953	1.5665	0.0206	0.1236	1.3884	0.0758	0.2657	1.382	0.0873	0.262	1.5184	0.0345	0.1438
GO_MITOTIC_CELL_CYCLE	1.4044	0.0048	0.2387	1.4118	0.0017	0.2165	1.3195	0.018	0.3213	1.6	0	0.1047	1.1217	0.1469	0.6001	1.1303	0.157	0.5944	1.6477	0	0.0728
GO_ALPHA_LINOLENIC_ACID_METABOLIC_PROCESS	1.3635	0.1318	0.2775	1.4108	0.0994	0.2173	1.2296	0.2177	0.4248	0.7575	0.7472	1	0.989	0.4589	0.786	1.3701	0.1155	0.2766
GO_REGULATION_OF_TRANSCRIPTION_INVOLVED_IN_G1_S_TRANSITION_OF_MITOTIC_CELL_CYCLE	1.2648	0.1809	0.4009	1.4078	0.0846	0.2206	1.3542	0.1141	0.2844	1.3792	0.0967	0.3019	1.1535	0.3112	0.5508	1.2431	0.2275	0.4264	1.3668	0.1206	0.2763
GO_POSITIVE_REGULATION_OF_VIRAL_GENOME_REPLICATION	1.274	0.1584	0.3871	1.4074	0.0712	0.2205	1.0478	0.3928	0.7073	0.9966	0.4578	0.8141	1.0739	0.3456	0.666	1.2371	0.1828	0.4335	1.6129	0.034	0.0863
GO_REGULATION_OF_B_CELL_MEDIATED_IMMUNITY	1.4849	0.0611	0.1601	1.4068	0.0906	0.2209	1.4384	0.0865	0.1974	1.798	0.0053	0.0238	1.4004	0.0786	0.2554	1.4034	0.0899	0.2431	1.2883	0.1701	0.3574
GO_EPITHELIAL_TUBE_BRANCHING_INVOLVED_IN_LUNG_MORPHOGENESIS	1.0268	0.4307	0.7605	1.4037	0.0955	0.2244	1.3455	0.1412	0.2928	1.3264	0.1579	0.3686	1.002	0.4785	0.7727	1.1476	0.2978	0.5723	1.1532	0.3002	0.5224
GO_SOMATIC_DIVERSIFICATION_OF_IMMUNE_RECEPTORS_VIA_SOMATIC_MUTATION	1.5367	0.047	0.1229	1.4017	0.1113	0.2265	1.5743	0.0168	0.1031	2.0175	0	0.0027	1.5854	0.0311	0.1044	1.4805	0.0622	0.1732
GO_POSTSYNAPTIC_MEMBRANE_ORGANIZATION	1.3807	0.1115	0.2593	1.4001	0.0965	0.2281	0.9094	0.5789	0.9216	1.6215	0.0249	0.0915	1.3349	0.149	0.3262	1.3889	0.11	0.2576	1.0572	0.3878	0.6538
GO_ENDODERMAL_CELL_FATE_COMMITMENT	1.5643	0.0299	0.1035	1.3998	0.0987	0.228	1.4719	0.0522	0.1733	0.8256	0.6957	1	1.4865	0.0561	0.173	1.4269	0.0752	0.2198	1.6639	0.0083	0.0653
GO_TELOMERE_MAINTENANCE_IN_RESPONSE_TO_DNA_DAMAGE	1.0522	0.3984	0.7238	1.3995	0.0983	0.2278	1.4988	0.0522	0.1537	1.3921	0.1176	0.2864	1.1546	0.3136	0.5522	0.8687	0.6273	0.936	1.1887	0.2672	0.4808
GO_ESTABLISHMENT_OF_PROTEIN_LOCALIZATION_TO_CHROMOSOME	1.2932	0.1688	0.3633	1.3982	0.1021	0.2291	1.363	0.1337	0.2766	0.6578	0.8806	1	1.4244	0.0699	0.2336	1.317	0.1398	0.3347	1.422	0.1109	0.2233
GO_REGULATION_OF_POSTTRANSCRIPTIONAL_GENE_SILENCING	1.318	0.1229	0.3308	1.3976	0.0907	0.2293	1.2978	0.119	0.3469	1.305	0.1294	0.3991	1.3443	0.0792	0.3155	1.3079	0.1162	0.3437	1.5138	0.038	0.1456
GO_SINGLE_STRANDED_VIRAL_RNA_REPLICATION_VIA_DOUBLE_STRANDED_DNA_INTERMEDIATE	1.3794	0.0904	0.2594	1.3974	0.099	0.2291	1.5451	0.0361	0.1215	1.4918	0.0558	0.1842	1.3642	0.13	0.2912	1.3976	0.0939	0.2489	1.4956	0.0639	0.1592
GO_GAMETE_GENERATION	1.4485	0.0084	0.1906	1.3944	0.0316	0.2326	1.4043	0.0191	0.2292	1.2195	0.1059	0.5132	1.0865	0.2896	0.6571	1.3238	0.045	0.3266	1.5122	0.0054	0.1466
GO_POSITIVE_REGULATION_OF_CHROMATIN_SILENCING	1.4502	0.079	0.1892	1.3929	0.1006	0.2341	1.3576	0.1255	0.2809	1.6162	0.0165	0.0953	1.1935	0.2527	0.5017	1.4453	0.0648	0.2021	1.5621	0.0472	0.1154
GO_PYRIMIDINE_NUCLEOTIDE_BIOSYNTHETIC_PROCESS	1.3732	0.1028	0.2667	1.3874	0.0754	0.241	1.6381	0.0239	0.068	1.0107	0.4357	0.799	1.1673	0.2936	0.5375	1.271	0.1546	0.3904	0.9711	0.4912	0.7772
GO_EMBRYONIC_PLACENTA_MORPHOGENESIS	1.5165	0.0473	0.1364	1.3856	0.1113	0.2428	0.9839	0.4603	0.8067	0.9217	0.5793	0.9184	0.9351	0.5518	0.8558	1.4905	0.0526	0.1665	1.641	0.0283	0.0753
GO_POSITIVE_REGULATION_OF_CHROMOSOME_ORGANIZATION	1.4635	0.0278	0.177	1.3852	0.0602	0.2428	1.3348	0.0649	0.304	1.4928	0.02	0.1836	1.2663	0.1185	0.4159	1.3327	0.0836	0.3172	1.6762	0.0094	0.0606
GO_POSITIVE_REGULATION_OF_RNA_SPLICING	1.3878	0.1063	0.2546	1.385	0.1031	0.2425	1.4091	0.0881	0.2242	1.3953	0.0944	0.2832	1.5004	0.0496	0.1621	1.418	0.0945	0.2283	1.4415	0.0682	0.2052
GO_REGULATION_OF_ATTACHMENT_OF_SPINDLE_MICROTUBULES_TO_KINETOCHORE	1.2494	0.1978	0.4186	1.3847	0.122	0.2424	1.2337	0.2336	0.4199	1.5814	0.0324	0.1148	0.9605	0.5193	0.8244	0.851	0.6293	0.9429	1.3351	0.1379	0.3056
GO_PROTEIN_HEXAMERIZATION	1.3105	0.1605	0.3382	1.3841	0.1137	0.2426	1.7174	0.0058	0.0404	1.1368	0.3037	0.6425	1.8125	0.002	0.0223	1.3452	0.1537	0.303
GO_PROTEIN_LOCALIZATION_TO_NUCLEOLUS	1.3842	0.1213	0.2573	1.3824	0.0978	0.2445	1.2606	0.2028	0.3885	1.5269	0.0508	0.1537	1.2388	0.1988	0.4496	1.2421	0.2183	0.4275	1.4816	0.0756	0.1706
GO_POSITIVE_REGULATION_OF_DNA_BIOSYNTHETIC_PROCESS	1.3576	0.0785	0.2834	1.3823	0.0785	0.2441	1.124	0.2952	0.5855	1.3741	0.0888	0.3058	1.4744	0.0548	0.1839	1.3221	0.1157	0.3273	1.4981	0.0405	0.1576
GO_PHOSPHORYLATION_OF_RNA_POLYMERASE_II_C_TERMINAL_DOMAIN	1.2854	0.1853	0.3736	1.3809	0.1125	0.2453	1.3559	0.1238	0.283	1.4592	0.0975	0.2198	1.7116	0.0136	0.0497	1.3659	0.1241	0.2812	1.4169	0.1186	0.2283
GO_FATTY_ACYL_COA_BIOSYNTHETIC_PROCESS	1.2129	0.2405	0.4675	1.3787	0.1025	0.2479	1.4131	0.093	0.2193	1.1297	0.2946	0.6509	1.1572	0.2889	0.5522	1.3153	0.1623	0.336	0.8863	0.6052	0.8828
GO_POSITIVE_REGULATION_OF_PROTEIN_LOCALIZATION_TO_NUCLEUS	1.4734	0.0404	0.1686	1.3775	0.0651	0.2491	1.0787	0.3242	0.6628	1.5026	0.0342	0.1736	1.245	0.1285	0.4406	1.4887	0.0352	0.168	1.7663	0.0024	0.031
GO_NEGATIVE_REGULATION_OF_PROTEIN_POLYUBIQUITINATION	1.359	0.1292	0.2819	1.3738	0.1126	0.2538	-0.9635	0.5032	0.6642	1.2199	0.2368	0.5132	1.0635	0.4008	0.6867	1.2868	0.1797	0.3696	1.371	0.1258	0.2728
GO_PROGESTERONE_RECEPTOR_SIGNALING_PATHWAY	1.3373	0.1491	0.306	1.3735	0.1125	0.2537	1.1386	0.3346	0.562	1.2729	0.1834	0.4354	1.2511	0.2129	0.434	1.3618	0.1165	0.2864
GO_REGULATION_OF_TRANSCRIPTION_BY_RNA_POLYMERASE_III	1.3834	0.1257	0.2573	1.3728	0.1212	0.254	1.4677	0.0633	0.1747	1.4541	0.0824	0.2257	1.6692	0.0084	0.065	1.4203	0.1055	0.2263	1.5233	0.0624	0.1422
GO_C4_DICARBOXYLATE_TRANSPORT	1.3403	0.1157	0.3025	1.3704	0.1243	0.2571	1.3119	0.1604	0.3305	1.1798	0.2905	0.582	1.4685	0.0634	0.1888	1.393	0.1107	0.2534
GO_GRANULOCYTE_DIFFERENTIATION	1.322	0.1568	0.326	1.3703	0.1281	0.2566	1.4031	0.1082	0.2297	1.041	0.4054	0.7711	1.2744	0.1987	0.403	1.3537	0.1387	0.2953	1.3477	0.1405	0.2944
GO_REGULATION_OF_NUCLEOCYTOPLASMIC_TRANSPORT	1.2949	0.0923	0.3611	1.3627	0.0651	0.2669	1.584	0.0112	0.0971	1.2677	0.1166	0.443	1.2123	0.1528	0.4861	1.2636	0.132	0.4006	1.5521	0.0288	0.1215
GO_CELLULAR_AMINO_ACID_METABOLIC_PROCESS	1.4033	0.0135	0.2397	1.361	0.0482	0.2689	1.5716	0	0.1046	1.0425	0.3748	0.7689	1.5239	0.0082	0.1442	1.3855	0.0336	0.2575	-0.6694	0.9683	0.9707
GO_MITOCHONDRIAL_DNA_REPLICATION	1.4453	0.0862	0.1935	1.3601	0.1305	0.2696	1.593	0.0302	0.0914	1.503	0.0462	0.1736	1.1991	0.2865	0.4965	1.5694	0.0391	0.1076
GO_PYRIMIDINE_CONTAINING_COMPOUND_BIOSYNTHETIC_PROCESS	1.2492	0.1642	0.4183	1.3597	0.0916	0.2695	1.5238	0.0388	0.1351	1.1051	0.3228	0.6837	0.9857	0.484	0.7883	1.1114	0.3071	0.6182	0.9366	0.5224	0.8293
GO_NEGATIVE_REGULATION_OF_TELOMERE_MAINTENANCE	1.2262	0.2294	0.4468	1.3597	0.1462	0.269	0.6173	0.9343	1	1.3028	0.1586	0.4019	0.8429	0.6507	0.9348	1.1402	0.3084	0.5807	1.3137	0.1854	0.3285
GO_REGULATION_OF_DNA_DAMAGE_CHECKPOINT	1.2919	0.1723	0.3642	1.3594	0.128	0.2688	1.2309	0.2311	0.4237	0.7829	0.731	1	1.5936	0.0246	0.1011	1.1584	0.2876	0.555	1.4803	0.0722	0.1713
GO_MITOTIC_DNA_INTEGRITY_CHECKPOINT	1.2059	0.2004	0.4781	1.355	0.0631	0.2748	1.2994	0.1152	0.3448	1.4514	0.0328	0.2279	0.9829	0.4944	0.7933	1.1887	0.2125	0.5031	1.4515	0.0576	0.1978
GO_PYRIMIDINE_NUCLEOSIDE_BIOSYNTHETIC_PROCESS	1.2367	0.2444	0.4313	1.3533	0.1328	0.2766	0.9734	0.4843	0.828	1.2586	0.215	0.4538	1.182	0.2754	0.516	1.1108	0.3446	0.6188	1.2662	0.1973	0.3778
GO_NUCLEOLAR_LARGE_RRNA_TRANSCRIPTION_BY_RNA_POLYMERASE_I	1.254	0.2023	0.4136	1.3532	0.1128	0.2761	1.5597	0.0198	0.1128	1.1901	0.2751	0.5624	1.5317	0.0436	0.1392	1.4531	0.0678	0.1961	1.3719	0.1296	0.2729
GO_CELL_CYCLE_G1_S_PHASE_TRANSITION	1.2742	0.0926	0.3875	1.3531	0.0484	0.2756	1.3694	0.0358	0.2696	1.5912	0.0071	0.1082	0.9544	0.5193	0.8335	0.9166	0.6266	0.8945	1.5642	0.0026	0.1141
GO_POSITIVE_REGULATION_OF_RNA_BIOSYNTHETIC_PROCESS	1.3557	0.012	0.2857	1.351	0.0016	0.2783	1.3304	0.0049	0.3069	1.6412	0	0.0811	1.3561	0.0075	0.3002	1.2544	0.03	0.411	1.6274	0	0.0812
GO_QUINONE_BIOSYNTHETIC_PROCESS	1.3531	0.1454	0.2867	1.3509	0.1413	0.2778	1.5104	0.063	0.1445	0.9593	0.4991	0.8658	1.2655	0.1883	0.4165	1.5119	0.0554	0.1497
GO_ESTABLISHMENT_OF_PROTEIN_LOCALIZATION_TO_ORGANELLE	1.3997	0.0146	0.2429	1.3508	0.0148	0.2772	1.4249	0.007	0.2092	0.9267	0.657	0.9164	1.0941	0.198	0.6451	1.4841	0.0017	0.1707	0.9815	0.5045	0.7638
GO_NEGATIVE_REGULATION_OF_PROTEIN_K63_LINKED_UBIQUITINATION	1.3349	0.1337	0.3085	1.3501	0.1398	0.2777	-0.9596	0.494	0.6705	1.1948	0.27	0.5549	1.0853	0.3848	0.658	1.2562	0.2008	0.4091	1.3469	0.1264	0.2939
GO_RESPIRATORY_ELECTRON_TRANSPORT_CHAIN	1.4831	0.0302	0.1607	1.3492	0.0694	0.2784	1.435	0.0304	0.2	-1.398	0.0409	0.3507	1.4054	0.0418	0.2506	1.5628	0.014	0.1109
GO_MITOCHONDRIAL_FUSION	1.2031	0.2193	0.4824	1.3488	0.1165	0.2785	1.1425	0.3085	0.556	1.4812	0.0647	0.1951	1.5323	0.0564	0.1391	1.3125	0.1484	0.3393
GO_POSITIVE_REGULATION_OF_TRANSCRIPTION_BY_RNA_POLYMERASE_III	1.2012	0.2544	0.4855	1.3455	0.1275	0.2829	1.4695	0.0624	0.1737	1.5254	0.0406	0.1548	1.5525	0.033	0.1232	1.2765	0.2031	0.3824	1.3649	0.1587	0.2776
GO_REGULATION_OF_DOUBLE_STRAND_BREAK_REPAIR_VIA_NONHOMOLOGOUS_END_JOINING	1.4478	0.0744	0.1909	1.3431	0.1469	0.2858	0.9413	0.5549	0.8791	1.8346	0.0019	0.0174	1.4541	0.0752	0.2008	1.3602	0.1394	0.2876	1.5452	0.0587	0.1253
GO_CHAPERONE_MEDIATED_PROTEIN_COMPLEX_ASSEMBLY	1.3501	0.1071	0.2901	1.3412	0.145	0.2882	1.4653	0.0823	0.1766	1.4282	0.1035	0.2493	1.4648	0.0732	0.1909	1.3872	0.121	0.257	0.9624	0.4685	0.7908
GO_POSITIVE_REGULATION_OF_BIOSYNTHETIC_PROCESS	1.3728	0.0044	0.2667	1.3404	0.0033	0.2887	1.2831	0.0083	0.3671	1.6033	0	0.103	1.2513	0	0.4345	1.2823	0.016	0.3754	1.5565	0	0.1183
GO_REGULATION_OF_HISTONE_MODIFICATION	1.3372	0.1059	0.3053	1.3375	0.0926	0.2926	1.4603	0.0387	0.1804	1.2858	0.1049	0.4217	1.3373	0.0888	0.3236	1.2692	0.1462	0.3923	1.5597	0.0254	0.1165
GO_REGULATION_OF_HEXOKINASE_ACTIVITY	1.2811	0.1774	0.3802	1.3369	0.1538	0.2929	0.7996	0.749	1	0.572	0.9436	1	1.3233	0.1564	0.3423	1.319	0.1644	0.3319
GO_MITOCHONDRIAL_RESPIRATORY_CHAIN_COMPLEX_III_ASSEMBLY	1.3772	0.0996	0.2619	1.3348	0.1388	0.2956	1.5546	0.0361	0.1165	0.7469	0.7947	1	1.4481	0.0643	0.2073	1.5168	0.035	0.1461
GO_DETECTION_OF_STIMULUS	1.3456	0.08	0.2959	1.3347	0.1048	0.2951	1.2224	0.1765	0.4342	1.2615	0.1217	0.4503	1.5617	0.0197	0.1186	1.2614	0.142	0.4032	1.1235	0.2563	0.5673
GO_GLUTAMINE_FAMILY_AMINO_ACID_METABOLIC_PROCESS	1.2932	0.1393	0.3626	1.3292	0.1324	0.3033	1.2699	0.1508	0.376	1.0917	0.3435	0.7012	1.4556	0.0578	0.2	1.2878	0.1477	0.3693	0.7793	0.7477	0.9774
GO_PYRIMIDINE_NUCLEOSIDE_TRIPHOSPHATE_BIOSYNTHETIC_PROCESS	1.3524	0.134	0.2871	1.3274	0.1344	0.3055	1.2823	0.1764	0.3665	1.6703	0.0079	0.0658	0.989	0.4937	0.7851	1.3731	0.0983	0.2734
GO_REGULATION_OF_PROTEIN_IMPORT	1.4591	0.0673	0.1807	1.3268	0.1121	0.3058	1.308	0.1296	0.3356	1.28	0.1667	0.4282	1.3477	0.0869	0.3107	1.5343	0.0397	0.1333	1.6226	0.0215	0.0827
GO_NUCLEOTIDE_TRANSPORT	1.4098	0.0928	0.2317	1.3257	0.1496	0.3068	1.2784	0.2182	0.3689	1.2346	0.2199	0.4916	1.4608	0.07	0.1948	1.4306	0.0856	0.216
GO_ISOPRENOID_BIOSYNTHETIC_PROCESS	1.3709	0.1097	0.269	1.3253	0.1582	0.3069	0.8484	0.6233	0.9859	0.8376	0.6493	1	1.2501	0.2033	0.4332	1.3989	0.0921	0.2476
GO_MEMBRANE_LIPID_METABOLIC_PROCESS	1.3691	0.07	0.271	1.3247	0.0827	0.3073	1.4595	0.0183	0.1808	0.9985	0.4414	0.8131	1.6919	0	0.0565	1.507	0.0201	0.1525	1.4275	0.0304	0.218
GO_REGULATION_OF_NUCLEOTIDE_BIOSYNTHETIC_PROCESS	1.4131	0.0902	0.2284	1.3242	0.1444	0.3073	1.1244	0.2927	0.5855	1.3787	0.1019	0.302	1.3568	0.1332	0.2997	1.6379	0.0332	0.0699	1.1175	0.3326	0.5742
GO_SEXUAL_REPRODUCTION	1.391	0.017	0.2518	1.3228	0.0519	0.3091	1.3474	0.0371	0.2912	1.1484	0.2067	0.6266	1.1658	0.1386	0.537	1.3439	0.0404	0.3045	1.5195	0.006	0.1446
GO_POSITIVE_REGULATION_OF_TYPE_I_INTERFERON_PRODUCTION	1.2574	0.1415	0.4094	1.3219	0.105	0.3098	1.1535	0.2543	0.5366	1.3351	0.0961	0.3582	1.1847	0.2265	0.5148	1.154	0.2401	0.5622	1.3753	0.0752	0.2697
GO_MRNA_TRANSCRIPTION	1.1475	0.3492	0.5755	1.3215	0.1693	0.3098	0.6707	0.8636	1	1.4501	0.0762	0.2285	0.9549	0.4989	0.8333	1.1967	0.2669	0.4904	1.2428	0.2315	0.4047
GO_POSITIVE_REGULATION_OF_DOUBLE_STRAND_BREAK_REPAIR	1.5754	0.0465	0.0968	1.3213	0.1421	0.3094	1.004	0.4528	0.7775	1.4286	0.0649	0.2499	1.3889	0.1162	0.2663	1.4037	0.1081	0.2433	1.6359	0.0279	0.0771
GO_REGULATION_OF_IMMUNOGLOBULIN_PRODUCTION	1.3538	0.0952	0.2868	1.3205	0.1257	0.31	1.2685	0.1673	0.377	1.7032	0.0164	0.0516	1.3502	0.0864	0.3073	1.2514	0.1825	0.4142	1.129	0.2829	0.5615
GO_B_CELL_ACTIVATION_INVOLVED_IN_IMMUNE_RESPONSE	1.36	0.1099	0.281	1.3197	0.1245	0.3107	1.4162	0.0737	0.2169	1.8017	0.0036	0.023	1.2988	0.1462	0.3722	1.28	0.1603	0.3774	1.0494	0.3914	0.6636
GO_POSITIVE_REGULATION_OF_NUCLEOBASE_CONTAINING_COMPOUND_TRANSPORT	1.3829	0.1165	0.2575	1.3194	0.1514	0.3106	1.4148	0.0684	0.2177	1.3045	0.1712	0.3994	1.3834	0.1282	0.2691	1.3227	0.1458	0.327	1.5195	0.0568	0.1442
GO_NEGATIVE_REGULATION_OF_NUCLEAR_DIVISION	1.2396	0.2035	0.4298	1.3147	0.1627	0.3176	1.1551	0.2741	0.534	1.4015	0.1022	0.2792	0.8586	0.6389	0.9232	0.9755	0.4801	0.8207	1.242	0.1991	0.4053
GO_GLYCEROPHOSPHOLIPID_CATABOLIC_PROCESS	1.4784	0.0681	0.1644	1.3141	0.1622	0.3179	0.7543	0.7763	1	1.1898	0.2659	0.5623	1.2453	0.2048	0.4409	1.5019	0.0583	0.157	1.2697	0.1979	0.3736
GO_PROTEIN_DEMETHYLATION	1.2535	0.218	0.4131	1.3129	0.1331	0.3192	1.2287	0.2188	0.425	1.2511	0.2105	0.4649	1.5339	0.04	0.1381	1.102	0.3473	0.63	1.3492	0.1125	0.2951
GO_PYRIMIDINE_RIBONUCLEOTIDE_BIOSYNTHETIC_PROCESS	1.2268	0.2312	0.4465	1.311	0.1876	0.3216	1.174	0.2695	0.5089	0.9969	0.4592	0.8145	1.053	0.4042	0.7001	1.4163	0.101	0.2295
GO_LEUCINE_CATABOLIC_PROCESS	1.2406	0.2311	0.4295	1.3094	0.1607	0.3238	1.5549	0.0328	0.1166	-0.8138	0.7094	0.9288	1.1526	0.2955	0.5519	1.3656	0.1364	0.281
GO_BLASTOCYST_GROWTH	1.395	0.1122	0.2479	1.3088	0.1708	0.3241	1.3679	0.1206	0.2714	1.5419	0.0526	0.1423	1.2631	0.1883	0.4204	1.1999	0.2539	0.4852	1.5096	0.0367	0.1486
GO_MACROMOLECULE_DEACYLATION	1.2243	0.1916	0.4474	1.3087	0.114	0.3235	1.3808	0.0769	0.2571	1.4065	0.0667	0.2745	1.2969	0.1325	0.3723	1.3334	0.1071	0.3168	1.1837	0.2048	0.4877
GO_RESPONSE_TO_L_GLUTAMATE	1.3456	0.1354	0.2966	1.3072	0.1578	0.3254	0.8192	0.6904	1	1.369	0.119	0.312	0.9604	0.5106	0.8236	1.3249	0.1603	0.3254
GO_TIGHT_JUNCTION_ORGANIZATION	1.2623	0.1423	0.4032	1.3065	0.1308	0.3259	0.796	0.7603	1	1.2339	0.1968	0.4922	1.5919	0.0152	0.1016	1.3527	0.1039	0.2957	1.4164	0.0649	0.2284
GO_POSITIVE_REGULATION_OF_GENE_EXPRESSION	1.3147	0.0045	0.3345	1.304	0.0113	0.3293	1.2887	0.0049	0.3585	1.6144	0	0.096	1.1946	0.0192	0.5012	1.2179	0.0327	0.4588	1.5185	0	0.1442
GO_CELL_MATURATION	1.2989	0.1269	0.3568	1.3012	0.1041	0.3332	1.0787	0.3574	0.6618	0.8538	0.7222	0.9955	1.1337	0.2608	0.5827	1.3139	0.1214	0.3377	0.8094	0.7287	0.9554
GO_NEGATIVE_REGULATION_OF_TRANSCRIPTION_BY_RNA_POLYMERASE_II	1.3794	0.0139	0.2599	1.2983	0.0427	0.3376	1.4198	0.0117	0.2142	1.5795	0.0031	0.1153	1.2985	0.0274	0.3719	1.3413	0.0233	0.308	1.608	0	0.088
GO_POSITIVE_REGULATION_OF_CELL_CYCLE_G2_M_PHASE_TRANSITION	0.9912	0.4594	0.8025	1.2975	0.1857	0.3381	1.6412	0.0314	0.0665	1.0382	0.4197	0.7757	0.9735	0.4889	0.8039	0.9392	0.5239	0.8672	1.1352	0.3066	0.5513
GO_PROTEIN_LOCALIZATION_TO_CHROMOSOME_CENTROMERIC_REGION	1.1272	0.3284	0.605	1.2968	0.1523	0.3387	1.63	0.025	0.0713	1.3273	0.1555	0.3676	1.2016	0.2447	0.4938	1.1491	0.2973	0.5708	1.2817	0.2085	0.3645
GO_CELL_FATE_COMMITMENT_INVOLVED_IN_FORMATION_OF_PRIMARY_GERM_LAYER	1.4839	0.0545	0.1602	1.2942	0.1845	0.3425	1.4215	0.1031	0.2125	0.8487	0.6336	1	1.5286	0.0494	0.1404	1.3552	0.1326	0.2937	1.5859	0.0368	0.1002
GO_RIG_I_SIGNALING_PATHWAY	1.2461	0.207	0.4226	1.2924	0.1535	0.345	1.4651	0.0904	0.1764	1.5084	0.0538	0.1683	1.377	0.1502	0.2739	1.1137	0.3296	0.6165	1.2558	0.21	0.3881
GO_NEGATIVE_REGULATION_OF_RESPONSE_TO_DNA_DAMAGE_STIMULUS	1.2601	0.1489	0.4049	1.2908	0.1456	0.347	1.0914	0.3232	0.6464	1.2258	0.2116	0.5058	1.2161	0.21	0.48	1.2631	0.1605	0.4007	1.3241	0.1226	0.3168
GO_LUNG_CELL_DIFFERENTIATION	1.2399	0.2259	0.4301	1.2875	0.175	0.352	1.2719	0.1885	0.3752	0.8898	0.6094	0.9618	1.2062	0.2352	0.4924	1.3228	0.1844	0.3275	1.3866	0.1288	0.2567
GO_REGULATION_OF_COENZYME_METABOLIC_PROCESS	1.0849	0.3617	0.6679	1.287	0.1795	0.3522	1.6144	0.0231	0.0787	1.3744	0.1274	0.3061	0.8635	0.6253	0.9227	1.1457	0.2965	0.5757
GO_POSITIVE_REGULATION_OF_NUCLEOCYTOPLASMIC_TRANSPORT	1.2539	0.1613	0.4131	1.2864	0.1138	0.3525	1.5223	0.0233	0.1358	1.0802	0.351	0.7121	1.207	0.1637	0.4925	1.2997	0.126	0.3561	1.518	0.019	0.1437
GO_PYRIMIDINE_NUCLEOSIDE_MONOPHOSPHATE_BIOSYNTHETIC_PROCESS	1.0227	0.4251	0.7637	1.2856	0.1739	0.3534	1.1866	0.2693	0.4887	-1.0578	0.3873	0.6545	1.1536	0.2851	0.5515	0.8988	0.5833	0.9094	0.9368	0.5359	0.8302
GO_TRICARBOXYLIC_ACID_CYCLE	1.3735	0.0857	0.2669	1.2811	0.1373	0.3603	1.3526	0.101	0.2861	0.7055	0.8768	1	1.221	0.1912	0.472	1.4925	0.0324	0.1649
GO_DE_NOVO_PROTEIN_FOLDING	1.3437	0.1113	0.2981	1.2803	0.1285	0.3611	1.2614	0.1654	0.3879	0.9688	0.5019	0.8581	-0.6835	0.9278	0.9623	1.2206	0.179	0.4551	0.9886	0.4809	0.7567
GO_TETRAHYDROFOLATE_METABOLIC_PROCESS	1.2608	0.2117	0.4045	1.2747	0.1781	0.3704	1.3307	0.1448	0.3072	1.1398	0.3327	0.6365	1.1807	0.2851	0.5179	1.1055	0.3594	0.6266
GO_REGULATION_OF_GENERATION_OF_PRECURSOR_METABOLITES_AND_ENERGY	1.207	0.1606	0.4776	1.2725	0.1049	0.3735	1.4453	0.032	0.1932	1.012	0.4338	0.7974	1.1548	0.2222	0.5535	1.2824	0.1144	0.376	0.9321	0.5668	0.837
GO_MOLTING_CYCLE_PROCESS	1.2658	0.166	0.3998	1.2693	0.1602	0.3787	1.2562	0.1608	0.3939	1.0878	0.3401	0.7086	1.4137	0.0762	0.2431	1.3693	0.1047	0.2772	1.4612	0.0741	0.1902
GO_HAIR_FOLLICLE_MATURATION	1.4907	0.0586	0.1561	1.2681	0.2169	0.3801	1.2821	0.1922	0.366	1.3373	0.1448	0.3556	1.3956	0.1143	0.2604	1.4267	0.0771	0.2196	1.5744	0.0463	0.1068
GO_DNA_DOUBLE_STRAND_BREAK_PROCESSING	1.2775	0.1888	0.3836	1.2668	0.1788	0.3818	1.1387	0.3308	0.5628	1.1743	0.2929	0.5918	1.663	0.015	0.0666	1.3887	0.1189	0.2573	1.3789	0.1274	0.2663
GO_NUCLEOSIDE_TRIPHOSPHATE_BIOSYNTHETIC_PROCESS	1.2978	0.181	0.3582	1.2663	0.1572	0.3818	0.9467	0.5313	0.875	1.2057	0.2309	0.5363	0.9048	0.5867	0.8869	1.4511	0.0607	0.1969	1.0428	0.3918	0.6705
GO_POSITIVE_REGULATION_OF_IMMUNOGLOBULIN_PRODUCTION	1.2764	0.1651	0.385	1.2662	0.1752	0.3814	1.2573	0.1811	0.3924	1.5813	0.0256	0.1145	1.4067	0.1097	0.2502	1.2067	0.2383	0.4761	1.0638	0.3634	0.6447
GO_REGULATION_OF_MRNA_CATABOLIC_PROCESS	1.4265	0.0378	0.2145	1.2651	0.1121	0.3827	1.2708	0.107	0.3751	1.06	0.357	0.7433	1.1886	0.1468	0.5084	1.311	0.076	0.3411	1.4079	0.0456	0.2369
GO_REGULATION_OF_INTEGRIN_MEDIATED_SIGNALING_PATHWAY	0.7958	0.7352	1	1.264	0.1996	0.384	1.0621	0.4118	0.6848	-0.6223	0.93	0.9974	1.0803	0.3771	0.6637	0.9016	0.5825	0.9121	0.878	0.6035	0.8935
GO_NUCLEAR_TRANSCRIBED_MRNA_CATABOLIC_PROCESS_EXONUCLEOLYTIC	1.2395	0.1683	0.4284	1.2611	0.2015	0.3886	1.3319	0.123	0.3068	0.8764	0.6418	0.9759	-0.846	0.6797	0.839	1.4493	0.0579	0.1975	1.4311	0.073	0.2155
GO_NEGATIVE_REGULATION_OF_CELL_CYCLE_PROCESS	1.101	0.2533	0.6389	1.261	0.0811	0.3879	1.0393	0.3842	0.7229	1.4058	0.0333	0.2742	0.9268	0.6246	0.8638	0.8845	0.7067	0.9226	1.3488	0.0485	0.2941
GO_COENZYME_BIOSYNTHETIC_PROCESS	1.2623	0.0953	0.4024	1.2584	0.1149	0.392	1.2715	0.1063	0.3745	1.0801	0.3195	0.7114	1.0931	0.2854	0.6465	1.4955	0.0265	0.163	-1.0136	0.4293	0.613
GO_EMBRYONIC_SKELETAL_SYSTEM_DEVELOPMENT	1.2305	0.1922	0.4397	1.2569	0.178	0.3939	1.3144	0.1354	0.3283	1.1298	0.3007	0.6517	1.5026	0.0558	0.1612	1.3101	0.1475	0.342	1.4471	0.0769	0.2011
GO_N_TERMINAL_PROTEIN_AMINO_ACID_ACETYLATION	1.1849	0.276	0.5082	1.2562	0.2058	0.3945	1.2974	0.1723	0.3455	0.9597	0.5161	0.8657	1.3127	0.1535	0.3561	1.1314	0.3288	0.5938	1.3474	0.1419	0.294
GO_CELL_CYCLE_ARREST	1.1221	0.2391	0.6085	1.2523	0.1017	0.4011	1.0846	0.3175	0.6542	1.5234	0.0084	0.1567	0.7648	0.9187	0.9808	1.058	0.3527	0.6944	1.1435	0.1984	0.5358
GO_CRANIAL_SKELETAL_SYSTEM_DEVELOPMENT	1.2097	0.221	0.4725	1.252	0.19	0.4008	0.8894	0.6023	0.9436	1.3919	0.1075	0.2861	1.1593	0.2857	0.5495	1.1581	0.265	0.5547	1.3488	0.1179	0.2948
GO_NLS_BEARING_PROTEIN_IMPORT_INTO_NUCLEUS	1.2779	0.1759	0.3838	1.2519	0.2071	0.4003	1.2473	0.2248	0.403	1.4679	0.0699	0.2107	0.9561	0.4929	0.8324	1.2875	0.1825	0.3689	1.43	0.1099	0.2162
GO_MITOTIC_G2_M_TRANSITION_CHECKPOINT	1.3075	0.1579	0.3426	1.2508	0.1869	0.4016	1.2421	0.1903	0.4099	1.3877	0.1165	0.2909	1.1347	0.3135	0.5814	1.31	0.1501	0.3415	1.4485	0.0857	0.2
GO_BLASTOCYST_DEVELOPMENT	1.311	0.1241	0.3381	1.2483	0.1682	0.4057	1.2484	0.1642	0.4024	1.7802	0.0089	0.0277	1.0588	0.3605	0.692	1.12	0.2886	0.6083	1.6238	0.0146	0.0823
GO_CIRCADIAN_REGULATION_OF_GENE_EXPRESSION	1.2469	0.1833	0.422	1.2475	0.2103	0.4063	1.0202	0.4557	0.7515	1.4463	0.0789	0.2327	1.1755	0.2603	0.5264	1.2483	0.2	0.4186	1.3255	0.1385	0.317
GO_COENZYME_METABOLIC_PROCESS	1.3169	0.0558	0.3321	1.2473	0.0893	0.4059	1.2023	0.1405	0.4662	1.0811	0.2895	0.7118	1.1687	0.1477	0.5363	1.5241	0.0076	0.1399	-0.8719	0.6882	0.7992
GO_POSITIVE_REGULATION_OF_CHROMOSOME_SEGREGATION	1.1458	0.2811	0.5776	1.2463	0.1842	0.407	1.1699	0.2563	0.5127	1.4412	0.0765	0.2373	0.8772	0.6131	0.9147	1.048	0.4091	0.7113	1.285	0.1558	0.3609
GO_LABYRINTHINE_LAYER_MORPHOGENESIS	1.3652	0.1092	0.2756	1.246	0.2101	0.4068	-0.7269	0.7967	0.9447	0.7817	0.7392	1	0.8562	0.6255	0.9223	1.2909	0.1546	0.3658	1.4054	0.0974	0.2388
GO_POSITIVE_REGULATION_OF_LYMPHOCYTE_MEDIATED_IMMUNITY	1.2909	0.1343	0.3653	1.2449	0.1607	0.4082	1.1988	0.2259	0.4708	1.7175	0.0133	0.0467	1.2521	0.1339	0.4346	1.1788	0.2281	0.5203	-0.9324	0.5548	0.7194
GO_MONOSACCHARIDE_BIOSYNTHETIC_PROCESS	1.1262	0.2575	0.6064	1.2445	0.1497	0.408	1.0662	0.3485	0.6807	0.7137	0.9149	1	1.3806	0.0585	0.2707	1.2284	0.1951	0.4433	-1.0838	0.3596	0.5251
GO_REGULATION_OF_CHROMATIN_SILENCING	1.3249	0.1481	0.3226	1.2419	0.1963	0.4122	1.2353	0.2011	0.4199	1.3697	0.1054	0.3122	1.1585	0.2624	0.5503	1.3344	0.1136	0.3165	1.4939	0.0562	0.1604
GO_RNA_STABILIZATION	1.3859	0.1089	0.256	1.2414	0.1757	0.4117	0.9192	0.5845	0.9076	1.3578	0.1197	0.3261	1.5249	0.0441	0.1436	1.4497	0.0755	0.1975	1.4518	0.0771	0.198
GO_ATP_SYNTHESIS_COUPLED_ELECTRON_TRANSPORT	1.3393	0.0853	0.3034	1.2414	0.1537	0.4124	1.2751	0.1099	0.3717	-1.4699	0.0229	0.2959	1.1696	0.2321	0.5352	1.4828	0.0244	0.1715
GO_MULTI_ORGANISM_CELLULAR_LOCALIZATION	1.1314	0.3287	0.597	1.241	0.2074	0.4116	1.3603	0.126	0.2776	1.3562	0.1487	0.3262	0.8669	0.632	0.9223	1.1793	0.2583	0.5201	1.2984	0.1858	0.3466
GO_NUCLEAR_TRANSCRIBED_MRNA_CATABOLIC_PROCESS_DEADENYLATION_DEPENDENT_DECAY	1.424	0.0651	0.2174	1.2407	0.1646	0.4115	1.3412	0.0866	0.2972	1.2981	0.1343	0.4073	0.7997	0.7804	0.9607	1.5203	0.0345	0.1429	1.5763	0.0294	0.1069
GO_PROTEIN_FOLDING	1.3192	0.031	0.3302	1.2401	0.0969	0.4118	1.3139	0.0368	0.3284	1.1262	0.2241	0.6558	1.1097	0.2386	0.6211	1.2756	0.0632	0.3833	1.1097	0.2688	0.586
GO_MULTI_ORGANISM_LOCALIZATION	1.0988	0.3073	0.6413	1.2394	0.1493	0.4125	1.3459	0.0894	0.2927	1.0131	0.4243	0.7985	1.2154	0.1782	0.4805	1.0179	0.4364	0.7638	1.2841	0.1305	0.3615
GO_HISTONE_H3_ACETYLATION	1.1834	0.227	0.5104	1.2391	0.2101	0.4121	1.2629	0.185	0.3858	1.3882	0.0904	0.2908	0.6283	0.9323	1	0.9558	0.5071	0.8503	1.3273	0.1567	0.3159
GO_HISTONE_H2B_UBIQUITINATION	1.3555	0.138	0.2853	1.2385	0.2198	0.4125	1.1084	0.3235	0.6156	0.7781	0.7532	1	1.5117	0.0554	0.155	1.2367	0.2351	0.4335	1.5094	0.0594	0.1483
GO_REGULATION_OF_TELOMERE_MAINTENANCE	1.3851	0.0907	0.2566	1.2369	0.199	0.4149	0.9086	0.6029	0.9225	1.2011	0.2184	0.5427	1.4861	0.0568	0.1731	1.3009	0.1398	0.3546	1.5335	0.0364	0.1341
GO_REGULATION_OF_PROTEIN_K63_LINKED_UBIQUITINATION	1.1909	0.2637	0.5024	1.2367	0.2179	0.4146	-0.8676	0.6548	0.8083	1.1593	0.2805	0.6127	1.0191	0.4181	0.7479	1.1279	0.3185	0.5951	1.258	0.1952	0.3868
GO_MICROTUBULE_DEPOLYMERIZATION	1.2848	0.1792	0.374	1.2364	0.1989	0.4144	0.9422	0.5371	0.8803	0.8573	0.654	0.9925	1.172	0.2753	0.5319	1.2544	0.2016	0.4117	1.4294	0.1043	0.2163
GO_MALE_GAMETE_GENERATION	1.2356	0.1346	0.4327	1.2363	0.1341	0.4138	1.2217	0.1403	0.4347	1.0176	0.4125	0.7962	1.0742	0.3265	0.6672	1.1748	0.1815	0.5262	1.2688	0.0911	0.3742
GO_PYRIMIDINE_CONTAINING_COMPOUND_CATABOLIC_PROCESS	1.1355	0.2844	0.5921	1.2346	0.2212	0.4162	1.0156	0.4139	0.7581	1.1613	0.2827	0.6087	1.2682	0.1793	0.4131	1.195	0.2428	0.4931
GO_CYTOPLASMIC_TRANSLATIONAL_INITIATION	1.1146	0.3141	0.6188	1.2338	0.2369	0.4169	1.2773	0.2021	0.3702	-0.6075	0.9243	0.9983	1.3086	0.1636	0.3627	1.0686	0.3418	0.6813	1.2744	0.1667	0.3714
GO_REGULATION_OF_SKELETAL_MUSCLE_TISSUE_DEVELOPMENT	0.9362	0.5382	0.8739	1.233	0.2278	0.4177	1.2304	0.2173	0.4239	1.2056	0.2323	0.5349	0.9663	0.5261	0.8157	0.9568	0.5098	0.8509	0.8755	0.6073	0.8967
GO_GENITALIA_DEVELOPMENT	1.1068	0.3391	0.6307	1.2327	0.2031	0.4176	1.1164	0.3366	0.5994	0.9927	0.4787	0.8217	1.1977	0.257	0.4975	1.188	0.2667	0.5037
GO_HISTONE_DEACETYLATION	1.1995	0.2138	0.4882	1.2308	0.1706	0.4206	1.5314	0.037	0.1303	1.4409	0.0919	0.2364	1.315	0.1137	0.353	1.3536	0.0887	0.2949	1.2014	0.2098	0.4628
GO_SINGLE_STRAND_BREAK_REPAIR	1.0062	0.4571	0.7843	1.2295	0.2404	0.4223	1.3342	0.1513	0.3037	1.0771	0.3907	0.7148	1.0603	0.3915	0.6916	1.1742	0.2913	0.5266	1.1222	0.3281	0.569
GO_SUCCINYL_COA_METABOLIC_PROCESS	1.2953	0.1761	0.3612	1.2276	0.2305	0.4253	1.5198	0.0503	0.1366	1.2668	0.1825	0.444	1.1714	0.3062	0.5323	1.3272	0.1624	0.3224
GO_POSITIVE_REGULATION_OF_HISTONE_METHYLATION	1.1103	0.308	0.6262	1.2212	0.2368	0.437	1.3052	0.1629	0.3383	1.1451	0.3045	0.6301	1.2863	0.1892	0.3842	1.1893	0.2505	0.5026	1.2196	0.2429	0.4363
GO_PLUS_END_DIRECTED_ORGANELLE_TRANSPORT_ALONG_MICROTUBULE	1.2395	0.2274	0.4292	1.2209	0.2464	0.4368	1.0671	0.4046	0.6794	0.7478	0.7897	1	1.2522	0.2156	0.4352	1.3687	0.1141	0.2776	1.377	0.1413	0.2681
GO_DOSAGE_COMPENSATION	1.2419	0.2164	0.4276	1.2201	0.2425	0.4375	1.5178	0.0542	0.1381	1.3994	0.0998	0.2811	1.4056	0.1138	0.251	1.2135	0.2621	0.4653	1.3943	0.1189	0.2493
GO_OOGENESIS	1.1084	0.3189	0.629	1.22	0.219	0.437	1.2807	0.1758	0.367	1.0801	0.3743	0.7105	0.6324	0.9388	1	0.9217	0.5608	0.8882	1.0534	0.3797	0.6583
GO_PROTEIN_LOCALIZATION_TO_ORGANELLE	1.2516	0.0384	0.4159	1.2188	0.0566	0.4385	1.1649	0.0874	0.5186	-0.9942	0.4768	0.7236	1.0845	0.1919	0.6578	1.2349	0.024	0.4355	1.0348	0.3422	0.6821
GO_CYTOPLASMIC_MRNA_PROCESSING_BODY_ASSEMBLY	1.3154	0.1663	0.334	1.2187	0.2346	0.4379	1.5245	0.0684	0.1353	1.1296	0.3016	0.6502	1.0191	0.4419	0.7469	1.5205	0.0414	0.1432	1.496	0.0622	0.1592
GO_MOLTING_CYCLE	1.2746	0.1596	0.3876	1.2176	0.2063	0.4393	1.2472	0.1755	0.4024	1.1001	0.3352	0.6929	1.4375	0.0768	0.219	1.358	0.1147	0.2905	1.4429	0.0903	0.2041
GO_POSITIVE_REGULATION_OF_VIRAL_PROCESS	1.176	0.1978	0.5231	1.2171	0.1791	0.4395	0.8788	0.6825	0.9549	1.0964	0.3168	0.6968	1.0324	0.3951	0.7269	1.1287	0.2411	0.5942	1.3951	0.0526	0.249
GO_PROTEIN_REFOLDING	1.0818	0.3425	0.6716	1.2136	0.1903	0.4456	1.7351	0.0056	0.0354	0.9543	0.5202	0.8702	1.1961	0.2032	0.4992	1.0304	0.4156	0.7431	0.7928	0.7903	0.9659
GO_CELLULAR_RESPONSE_TO_HYDROGEN_PEROXIDE	1.2501	0.1569	0.4181	1.2132	0.1983	0.4455	1.1169	0.296	0.5993	1.4048	0.0507	0.2745	1.1291	0.2688	0.5912	1.2409	0.1642	0.4283	1.3606	0.0769	0.283
GO_POSITIVE_REGULATION_OF_TRANSCRIPTION_BY_RNA_POLYMERASE_II	1.2899	0.0369	0.3663	1.2084	0.0702	0.4546	1.0332	0.3841	0.7332	1.5923	0.0015	0.108	1.295	0.0175	0.3743	1.2211	0.0646	0.4558	1.6065	0	0.0888
GO_SUCCINATE_METABOLIC_PROCESS	1.3926	0.1128	0.2501	1.2075	0.249	0.4557	1.3891	0.1056	0.2463	1.078	0.3733	0.7131	1.2203	0.2394	0.4726	1.423	0.0988	0.2232
GO_CELLULAR_KETONE_BODY_METABOLIC_PROCESS	1.1341	0.3461	0.5944	1.2046	0.2622	0.4606	1.0322	0.459	0.7349	-0.9921	0.4638	0.7255	1.2438	0.2191	0.4422	1.1448	0.3284	0.576
GO_ZINC_ION_TRANSPORT	1.1477	0.2758	0.5762	1.2032	0.258	0.4626	1.781	0.0019	0.0244	-0.6281	0.9072	0.9979	1.2364	0.2238	0.4528	1.1646	0.2819	0.5463
GO_CELLULAR_AMINO_ACID_BIOSYNTHETIC_PROCESS	1.1675	0.2346	0.5397	1.2003	0.2194	0.4678	1.2544	0.167	0.3949	1.5314	0.0237	0.1507	1.3069	0.1383	0.3633	1.2327	0.1823	0.4373	0.588	0.9572	1
GO_GAS_HOMEOSTASIS	1.2306	0.2414	0.4404	1.1995	0.252	0.4687	0.9874	0.476	0.8027	1.3081	0.1679	0.3952	1.2958	0.198	0.3735	1.2847	0.1811	0.3726
GO_ANTERIOR_POSTERIOR_PATTERN_SPECIFICATION	1.1235	0.2822	0.607	1.1994	0.2234	0.4681	0.9808	0.4632	0.8128	1.1543	0.2433	0.6204	0.8933	0.6223	0.9026	1.2239	0.1806	0.4509	1.0473	0.3893	0.6642
GO_RNA_SURVEILLANCE	1.2706	0.2101	0.3921	1.1993	0.251	0.4674	1.2975	0.1673	0.3461	1.1794	0.2844	0.5818	1.0184	0.4558	0.7465	1.3096	0.1561	0.3414
GO_IMMUNOGLOBULIN_PRODUCTION	1.2446	0.1823	0.4239	1.1981	0.2107	0.4688	1.2486	0.1429	0.4027	1.6357	0.0115	0.0847	1.3824	0.0673	0.2693	1.2269	0.19	0.4455	-0.9849	0.4742	0.6499
GO_RIBOSOMAL_LARGE_SUBUNIT_EXPORT_FROM_NUCLEUS	1.1426	0.3333	0.5773	1.1978	0.2662	0.4686	1.2013	0.2738	0.4675	1.0037	0.4686	0.8079	1.0629	0.4213	0.6871	1.0015	0.4676	0.7862	1.2133	0.2246	0.4453
GO_GUANOSINE_CONTAINING_COMPOUND_BIOSYNTHETIC_PROCESS	1.2628	0.1898	0.4031	1.1964	0.2448	0.4708	0.9347	0.5633	0.8862	1.578	0.0371	0.1155	0.7673	0.7532	0.9809	1.424	0.0994	0.2226
GO_PRE_MIRNA_PROCESSING	1.2788	0.1855	0.3828	1.1955	0.2444	0.4719	1.235	0.2202	0.4196	1.2173	0.266	0.5176	0.8753	0.5925	0.917	1.2892	0.194	0.3683	1.056	0.3872	0.6556
GO_NEGATIVE_REGULATION_OF_DNA_BIOSYNTHETIC_PROCESS	0.9843	0.478	0.8098	1.1947	0.2486	0.4727	0.793	0.7314	1	1.0332	0.4181	0.783	0.8766	0.6087	0.9151	0.9442	0.5418	0.8639	1.0529	0.39	0.6586
GO_REGULATION_OF_CELL_CYCLE	1.1932	0.0749	0.4982	1.1935	0.063	0.4744	1.0625	0.2761	0.6848	1.3176	0.0101	0.3806	1.0163	0.3569	0.7486	0.9555	0.6267	0.8499	1.4097	0	0.2359
GO_REPLICATION_FORK_PROCESSING	1.1438	0.3181	0.5794	1.193	0.27	0.4745	1.063	0.3865	0.6854	1.2897	0.1782	0.4163	1.0487	0.4261	0.7023	1.0998	0.3671	0.6313	1.2701	0.2075	0.3746
GO_POSITIVE_REGULATION_OF_CELL_CYCLE_PROCESS	1.0519	0.3516	0.7235	1.1929	0.1581	0.4738	1.1437	0.2249	0.5541	1.3611	0.0571	0.3224	1.0317	0.3943	0.7277	0.9779	0.5102	0.8197	1.306	0.0562	0.3362
GO_RIBONUCLEOSIDE_TRIPHOSPHATE_BIOSYNTHETIC_PROCESS	1.3113	0.17	0.3382	1.1923	0.2401	0.4743	1.0196	0.4398	0.7509	1.4242	0.0836	0.2529	0.975	0.4915	0.8033	1.5843	0.0367	0.0995	1.1897	0.2709	0.48
GO_STRESS_GRANULE_ASSEMBLY	0.8844	0.5981	0.928	1.1913	0.2642	0.4755	1.2643	0.2064	0.384	1.0542	0.403	0.7513	0.9953	0.4799	0.7772	0.7678	0.7719	0.988	1.023	0.4213	0.7018
GO_NEGATIVE_REGULATION_OF_EPITHELIAL_CELL_DIFFERENTIATION	1.1773	0.2505	0.5211	1.188	0.2581	0.4813	0.9942	0.4525	0.7925	1.0303	0.4316	0.7838	1.1885	0.2768	0.5076	1.1543	0.2783	0.5626	1.3096	0.133	0.332
GO_RNA_POLYMERASE_II_PREINITIATION_COMPLEX_ASSEMBLY	0.9909	0.4459	0.8011	1.1866	0.2567	0.4835	1.4287	0.0888	0.2054	1.2967	0.1701	0.4083	0.6935	0.8516	1	0.9523	0.5251	0.8518	1.1087	0.3283	0.5861
GO_POSITIVE_REGULATION_OF_CELL_CYCLE	1.1246	0.2376	0.6073	1.1858	0.1543	0.4843	1.0525	0.3396	0.7015	1.3746	0.0548	0.3063	1.0405	0.3404	0.7158	0.9403	0.6004	0.8664	1.3434	0.0315	0.2986
GO_RESPONSE_TO_INSECTICIDE	0.9577	0.5362	0.846	1.1852	0.2646	0.4846	1.1619	0.2925	0.5216	1.0229	0.4608	0.7931	1.2	0.2635	0.4954	0.9032	0.5829	0.9124
GO_NEUTRAL_LIPID_BIOSYNTHETIC_PROCESS	1.243	0.2151	0.4263	1.1824	0.2667	0.4899	0.9223	0.5695	0.9052	1.1534	0.304	0.6188	0.851	0.6595	0.9262	1.3485	0.1398	0.3005
GO_POTASSIUM_ION_IMPORT_ACROSS_PLASMA_MEMBRANE	1.181	0.2717	0.514	1.1823	0.2655	0.4893	1.3024	0.1471	0.341	-0.6273	0.9142	0.9967	1.5882	0.0316	0.1035	1.1308	0.3004	0.5943	1.2712	0.1934	0.3743
GO_REGULATION_OF_CHROMATIN_BINDING	1.1096	0.3205	0.627	1.182	0.2616	0.4889	1.0496	0.4087	0.7067	1.0631	0.389	0.7389	1.0812	0.3721	0.6635	1.1492	0.2906	0.5715	1.2002	0.2577	0.4642
GO_SULFUR_AMINO_ACID_METABOLIC_PROCESS	1.234	0.1985	0.4351	1.1818	0.275	0.4885	0.6958	0.8377	1	1.2825	0.1724	0.4244	0.7951	0.7288	0.9657	1.4145	0.0928	0.2308
GO_REGULATION_OF_OXIDATIVE_PHOSPHORYLATION	1.1162	0.3264	0.6188	1.1786	0.2593	0.4945	1.542	0.0435	0.1231	1.1939	0.2509	0.5561	0.9522	0.5077	0.8358	1.1509	0.2616	0.5685
GO_KETONE_BIOSYNTHETIC_PROCESS	1.2168	0.2259	0.4619	1.1772	0.2558	0.4967	1.1563	0.2602	0.5322	0.7499	0.8137	1	1.145	0.2822	0.5641	1.4095	0.0724	0.2373
GO_AMYLOID_PRECURSOR_PROTEIN_BIOSYNTHETIC_PROCESS	1.1148	0.362	0.6204	1.1771	0.2933	0.496	0.8542	0.65	0.9786	0.7268	0.7996	1	1.4944	0.061	0.1669	1.1354	0.314	0.5893	1.2473	0.2199	0.3978
GO_DICARBOXYLIC_ACID_CATABOLIC_PROCESS	1.3964	0.114	0.2463	1.1759	0.2712	0.4977	0.9235	0.5421	0.9044	0.8788	0.6059	0.9751	1.0452	0.3923	0.7091	1.2463	0.2063	0.4215
GO_REGULATION_OF_MEGAKARYOCYTE_DIFFERENTIATION	1.2165	0.2023	0.4607	1.1734	0.2579	0.5021	1.659	0.016	0.0582	1.3651	0.1087	0.3173	1.4217	0.0719	0.2354	1.2409	0.2101	0.4291	1.2725	0.1729	0.3738
GO_SKELETAL_MUSCLE_ACETYLCHOLINE_GATED_CHANNEL_CLUSTERING	1.0343	0.4267	0.7484	1.1712	0.2952	0.5059	0.6919	0.8538	1	1.4374	0.0732	0.241	0.9329	0.5606	0.857	1.1452	0.3149	0.5758
GO_RNA_PHOSPHODIESTER_BOND_HYDROLYSIS_EXONUCLEOLYTIC	1.2258	0.2045	0.446	1.171	0.2353	0.5054	1.4408	0.09	0.1951	1.0599	0.4055	0.7427	1.1839	0.2257	0.5138	1.0992	0.3321	0.6318	1.4005	0.0998	0.2438
GO_REGULATION_OF_RNA_POLYMERASE_II_TRANSCRIPTIONAL_PREINITIATION_COMPLEX_ASSEMBLY	0.949	0.5285	0.8536	1.1693	0.2985	0.5084	1.0009	0.4615	0.7812	1.5133	0.0421	0.165	0.7543	0.7651	0.9848	1.0625	0.3757	0.689	1.0836	0.3866	0.6204
GO_REGULATION_OF_POTASSIUM_ION_IMPORT	1.2261	0.2361	0.4462	1.1685	0.2846	0.5091	1.2948	0.1759	0.3494	0.9646	0.5019	0.8647	1.2791	0.1854	0.3958	1.1611	0.293	0.5507	1.3252	0.1591	0.3167
GO_MITOCHONDRIAL_FISSION	1.031	0.42	0.7549	1.1677	0.2689	0.51	-0.6024	0.9615	0.9919	1.225	0.2072	0.506	1.4998	0.0624	0.1614	1.0156	0.42	0.7675	-0.9581	0.5102	0.687
GO_INORGANIC_ANION_TRANSPORT	1.1688	0.2194	0.5376	1.1669	0.219	0.5109	1.1028	0.3517	0.6253	0.866	0.689	0.9868	0.9476	0.5604	0.8412	1.1609	0.2182	0.5502	-0.6617	0.9253	0.9747
GO_POSITIVE_REGULATION_OF_CYTOKINESIS	1.3685	0.1304	0.2713	1.1661	0.2631	0.5117	0.8455	0.668	0.9891	1.1093	0.3246	0.6786	1.2016	0.2127	0.493	1.1874	0.2452	0.5042	1.4563	0.0971	0.1941
GO_REGULATION_OF_MITOTIC_CELL_CYCLE	1.1355	0.182	0.5931	1.165	0.131	0.5131	1.0357	0.3497	0.7291	1.2567	0.0706	0.4545	0.9476	0.5836	0.8403	0.8538	0.8417	0.9402	1.2953	0.036	0.3508
GO_G0_TO_G1_TRANSITION	1.1625	0.2794	0.5472	1.1641	0.286	0.5143	1.2406	0.2015	0.412	1.5739	0.0359	0.1173	1.1907	0.227	0.505	0.9506	0.5201	0.855	1.3374	0.1464	0.3037
GO_RHYTHMIC_PROCESS	1.1601	0.2212	0.5491	1.164	0.2169	0.5136	0.958	0.54	0.861	1.399	0.0506	0.2811	1.2081	0.1646	0.4913	1.2077	0.1617	0.4748	1.3562	0.0494	0.2877
GO_REGULATION_OF_VIRAL_GENOME_REPLICATION	1.0201	0.4165	0.763	1.1628	0.2144	0.5151	-0.9956	0.4455	0.6176	1.1557	0.2199	0.618	-0.822	0.753	0.8667	0.9576	0.5141	0.8499	1.2565	0.1213	0.3878
GO_SPERMATID_DIFFERENTIATION	0.9792	0.4812	0.8165	1.1627	0.2481	0.5146	0.7398	0.8431	1	0.7313	0.8543	1	1	0.4489	0.7734	0.9007	0.6262	0.9123	0.8368	0.71	0.938
GO_POSITIVE_REGULATION_OF_CELL_CYCLE_PHASE_TRANSITION	1.0523	0.3752	0.7246	1.1618	0.2458	0.5155	1.243	0.1236	0.4089	1.102	0.3157	0.6899	1.0405	0.3709	0.7148	0.9421	0.5519	0.8662	1.2627	0.135	0.3813
GO_FORMATION_OF_TRANSLATION_PREINITIATION_COMPLEX	1.0014	0.499	0.7883	1.1602	0.299	0.5182	0.667	0.8893	1	0.5876	0.9244	1	1.1085	0.3666	0.6228	0.9524	0.5542	0.8524	1.125	0.327	0.5661
GO_NEGATIVE_REGULATION_OF_CELL_CYCLE_PHASE_TRANSITION	1.0033	0.4164	0.7856	1.1574	0.206	0.5234	0.9273	0.5862	0.8977	1.3338	0.0641	0.3597	0.8049	0.821	0.9592	0.7586	0.8825	0.9951	1.2497	0.0949	0.3943
GO_RRNA_CATABOLIC_PROCESS	1.1746	0.3074	0.5254	1.1571	0.2909	0.5233	1.172	0.2931	0.5091	1.1248	0.3314	0.6564	-0.8867	0.5877	0.7874	1.2818	0.1953	0.3756	1.3121	0.1631	0.3296
GO_NEGATIVE_REGULATION_OF_CELLULAR_AMIDE_METABOLIC_PROCESS	1.1652	0.2218	0.5421	1.1569	0.2305	0.5227	1.234	0.1567	0.4208	1.2532	0.1346	0.4612	1.0828	0.3023	0.6609	1.176	0.1956	0.5255	1.1981	0.1711	0.4664
GO_NUCLEOSIDE_DIPHOSPHATE_BIOSYNTHETIC_PROCESS	1.0515	0.4061	0.7236	1.1565	0.3131	0.5228	0.9937	0.4795	0.7918	1.1439	0.3333	0.632	0.5292	0.9628	1	1.0752	0.3745	0.6689
GO_GLYCOSYL_COMPOUND_BIOSYNTHETIC_PROCESS	1.083	0.344	0.6695	1.1562	0.2602	0.5226	0.7812	0.7824	1	1.3357	0.1184	0.3577	0.8175	0.724	0.9516	1.0864	0.3478	0.653	1.1587	0.2827	0.5149
GO_REGULATION_OF_SYNAPSE_ASSEMBLY	1.1666	0.2677	0.5408	1.1541	0.2825	0.5262	1.2359	0.2276	0.4194	1.2744	0.1607	0.4358	1.3735	0.0954	0.2785	1.2927	0.1657	0.3649	1.2774	0.1747	0.3674
GO_FERTILIZATION	1.1886	0.2325	0.5029	1.1519	0.2621	0.5303	0.9503	0.5243	0.8723	1.0165	0.427	0.7962	1.0775	0.3372	0.6655	1.2153	0.2099	0.4634	0.9167	0.5805	0.8456
GO_POSITIVE_REGULATION_OF_CELL_CYCLE_G1_S_PHASE_TRANSITION	1.0656	0.3762	0.7054	1.1508	0.2578	0.5319	1.002	0.4566	0.7807	1.0196	0.4267	0.7941	1.3399	0.118	0.3206	0.9783	0.5	0.8197	1.2708	0.1803	0.3741
GO_POSITIVE_REGULATION_OF_ADAPTIVE_IMMUNE_RESPONSE	1.1831	0.2418	0.5103	1.1501	0.2452	0.5325	1.1013	0.3145	0.627	1.6305	0.0245	0.0857	-1.2257	0.173	0.3314	1.102	0.3038	0.6291	-0.9405	0.5406	0.7101
GO_NUCLEOBASE_CONTAINING_SMALL_MOLECULE_BIOSYNTHETIC_PROCESS	0.9915	0.4693	0.8039	1.1495	0.2309	0.5329	0.9073	0.5824	0.9224	1.3466	0.0884	0.3413	0.9524	0.5256	0.8365	1.0073	0.4353	0.7797	1.0165	0.4424	0.7109
GO_PROTEIN_MANNOSYLATION	1.2113	0.2854	0.47	1.1493	0.3039	0.5326	0.96	0.5365	0.859	1.4132	0.0985	0.2674	1.3914	0.104	0.2653	1.1918	0.2744	0.499	1.3485	0.1491	0.2938
GO_REPRODUCTION	1.1615	0.1179	0.5486	1.1481	0.1528	0.5343	1.123	0.1716	0.587	1.1626	0.1277	0.6083	1.0954	0.2126	0.6429	1.0937	0.2324	0.6402	1.3703	0.0069	0.273
GO_NEGATIVE_REGULATION_OF_ENDOPLASMIC_RETICULUM_STRESS_INDUCED_INTRINSIC_APOPTOTIC_SIGNALING_PATHWAY	1.2325	0.2166	0.4374	1.1475	0.2967	0.5346	0.7916	0.7173	1	1.021	0.4476	0.7951	1.103	0.3142	0.632	1.2743	0.1972	0.3849	0.6188	0.9251	0.9974
GO_MITOTIC_RECOMBINATION	1.0621	0.3583	0.7079	1.1463	0.2814	0.5364	1.1629	0.2831	0.5201	1.2823	0.1903	0.424	1.2892	0.1684	0.3821	1.0503	0.3988	0.7086	0.7013	0.8359	1
GO_MICROTUBULE_ANCHORING	1.2384	0.2015	0.4289	1.1428	0.2992	0.5432	1.5326	0.0441	0.1296	1.0711	0.3973	0.7264	0.8623	0.6247	0.9243	1.3325	0.1564	0.3161	1.294	0.1663	0.3513
GO_NUCLEOBASE_BIOSYNTHETIC_PROCESS	1.0814	0.3469	0.6715	1.141	0.2712	0.5463	1.2141	0.2231	0.4489	0.9847	0.4791	0.8353	1.1139	0.3221	0.6144	1.1422	0.2836	0.5789	1.2111	0.2195	0.4485
GO_REGULATION_BY_VIRUS_OF_VIRAL_PROTEIN_LEVELS_IN_HOST_CELL	1.3618	0.1141	0.2789	1.1407	0.334	0.5461	-0.8711	0.6019	0.8051	1.3576	0.1417	0.3257	-0.746	0.7595	0.9268	1.2017	0.2417	0.4859	1.3712	0.1368	0.2733
GO_HISTONE_PHOSPHORYLATION	1.2724	0.1825	0.3894	1.1404	0.2868	0.546	1.213	0.209	0.4496	1.1526	0.2789	0.6178	0.8717	0.6573	0.9189	0.9979	0.4562	0.7914	1.4082	0.0971	0.2372
GO_POSITIVE_REGULATION_OF_EMBRYONIC_DEVELOPMENT	0.8016	0.7238	1	1.1393	0.3236	0.5474	1.2006	0.2421	0.4681	-0.7146	0.8058	0.9769	0.9046	0.5724	0.8863	0.7845	0.7416	0.9806	0.8713	0.6193	0.8991
GO_REGULATION_OF_MICROTUBULE_DEPOLYMERIZATION	1.1241	0.3143	0.6075	1.1375	0.3162	0.5507	1.02	0.4039	0.751	0.878	0.6029	0.9741	1.5132	0.0433	0.1541	1.2013	0.233	0.4841	1.2328	0.2349	0.4161
GO_ATTACHMENT_OF_MITOTIC_SPINDLE_MICROTUBULES_TO_KINETOCHORE	1.0532	0.4125	0.7233	1.1369	0.3303	0.551	1.2767	0.1852	0.3698	1.3604	0.1296	0.3229	0.867	0.616	0.9233	0.9971	0.4775	0.7924	1.1768	0.2911	0.4938
GO_REGULATION_OF_TELOMERE_MAINTENANCE_VIA_TELOMERE_LENGTHENING	1.2064	0.2375	0.4779	1.1361	0.2914	0.551	0.6932	0.8674	1	1.0017	0.4358	0.8106	1.3594	0.1288	0.2977	1.18	0.2778	0.5196	1.2816	0.1718	0.364
GO_FIBROBLAST_GROWTH_FACTOR_RECEPTOR_SIGNALING_PATHWAY	0.9534	0.5292	0.8476	1.1361	0.2951	0.5518	0.7909	0.778	1	1.122	0.296	0.6617	0.9818	0.4784	0.794	0.9203	0.5778	0.8886	1.1261	0.2813	0.5648
GO_REGULATION_OF_HISTONE_H3_K4_METHYLATION	1.3121	0.1477	0.3383	1.1346	0.325	0.5536	1.5501	0.0295	0.1192	0.9292	0.5651	0.9156	1.3042	0.1634	0.3657	1.3714	0.1074	0.2754	1.4076	0.1152	0.2367
GO_ESTABLISHMENT_OF_VIRAL_LATENCY	1.1249	0.3276	0.6086	1.1341	0.3228	0.5537	1.1339	0.3386	0.5691	0.9225	0.5599	0.9175	-0.5093	0.968	0.9967	1.2572	0.1939	0.4095	1.2348	0.2318	0.4143
GO_NUCLEOSIDE_PHOSPHATE_BIOSYNTHETIC_PROCESS	1.148	0.2148	0.5765	1.1323	0.2261	0.5567	1.1516	0.1881	0.5399	1.1063	0.2799	0.6835	0.9593	0.57	0.8254	1.252	0.1038	0.414	-0.9522	0.5574	0.6938
GO_RESPONSE_TO_HEAT	1.1462	0.2258	0.5777	1.1304	0.2045	0.5601	1.0687	0.3204	0.6773	0.9814	0.477	0.8393	0.8853	0.7124	0.9108	1.1178	0.2567	0.6085	1.1824	0.1671	0.4894
GO_PROTEIN_HOMOTRIMERIZATION	1.27	0.1832	0.3924	1.126	0.3037	0.5693	1.1368	0.3138	0.5652	1.3081	0.1402	0.3945	0.9904	0.4623	0.7846	1.3323	0.1453	0.3151	1.0546	0.3747	0.6566
GO_HISTONE_H4_DEACETYLATION	1.0278	0.4228	0.7601	1.1256	0.3333	0.5693	1.5392	0.0429	0.1245	1.2648	0.1986	0.4457	1.4188	0.0898	0.238	1.1317	0.3314	0.594	1.1701	0.2655	0.5018
GO_PROTEIN_NEDDYLATION	1.2455	0.2328	0.4231	1.1249	0.3119	0.5698	1.0548	0.4073	0.698	1.2035	0.2602	0.5389	1.2305	0.2278	0.4601	1.293	0.1749	0.3652	1.3941	0.1217	0.2489
GO_REGULATION_OF_CYTOKINESIS	1.2031	0.1884	0.4832	1.1238	0.2845	0.5716	0.8094	0.781	1	1.0698	0.3635	0.728	-0.737	0.8538	0.9348	1.1051	0.297	0.6265	1.1748	0.2364	0.4941
GO_POSITIVE_REGULATION_OF_GLYCOPROTEIN_BIOSYNTHETIC_PROCESS	1.0461	0.3933	0.7312	1.1233	0.3296	0.5717	-0.556	0.9744	0.9965	-0.712	0.8395	0.9764	1.2703	0.2183	0.4099	1.019	0.4427	0.7631	1.181	0.2779	0.4884
GO_GENERATION_OF_PRECURSOR_METABOLITES_AND_ENERGY	1.1336	0.1724	0.5926	1.1231	0.2004	0.5712	1.2506	0.0473	0.4006	-0.9482	0.626	0.7809	1.0167	0.3962	0.7487	1.1988	0.1093	0.4867	-1.1309	0.2448	0.4583
GO_REGULATION_OF_CYCLIN_DEPENDENT_PROTEIN_KINASE_ACTIVITY	1.0964	0.3024	0.6453	1.1231	0.305	0.5703	1.0806	0.3229	0.6601	1.2056	0.2133	0.5356	0.7249	0.8938	0.9961	0.796	0.7952	0.9726	1.2646	0.1312	0.379
GO_KERATINIZATION	1.1608	0.2716	0.5493	1.1217	0.2802	0.5727	0.7951	0.7514	1	-1.4472	0.0711	0.3154	0.8591	0.6438	0.9241	1.2565	0.1843	0.4091	1.3268	0.1375	0.3158
GO_HISTONE_H2A_UBIQUITINATION	1.1893	0.2726	0.504	1.1214	0.3137	0.5723	0.8052	0.7365	1	1.0809	0.3996	0.7113	1.1218	0.3559	0.6009	1.1478	0.3215	0.5727	1.2093	0.2169	0.4508
GO_MULTICELLULAR_ORGANISM_REPRODUCTION	1.1876	0.1395	0.5041	1.1195	0.2057	0.5758	1.1687	0.1518	0.5146	1.1312	0.2088	0.651	0.9968	0.4628	0.7745	1.0469	0.358	0.7123	1.3017	0.0361	0.3421
GO_FATTY_ACID_CATABOLIC_PROCESS	1.1887	0.1859	0.5037	1.1179	0.2598	0.5785	1.2735	0.1315	0.374	-0.9523	0.5376	0.7772	1.1266	0.2371	0.5941	1.3019	0.086	0.3537	1.0799	0.3473	0.6245
GO_FIBROBLAST_APOPTOTIC_PROCESS	0.5489	0.979	0.9998	1.1173	0.3448	0.579	0.8057	0.7121	1	1.1638	0.2987	0.6062	1.2056	0.2324	0.4919	-0.5474	0.9681	0.9929	0.7503	0.7697	0.9899
GO_FOLIC_ACID_CONTAINING_COMPOUND_BIOSYNTHETIC_PROCESS	1.0777	0.376	0.6787	1.1132	0.3384	0.5874	1.3496	0.1426	0.2888	0.687	0.8537	1	-0.616	0.914	0.9832	0.8967	0.5947	0.9115
GO_POSITIVE_REGULATION_OF_CYCLIN_DEPENDENT_PROTEIN_KINASE_ACTIVITY	1.0317	0.4228	0.7539	1.1131	0.3508	0.5866	0.7772	0.7571	1	1.0064	0.482	0.8037	0.9651	0.4922	0.8168	0.7435	0.791	0.9938	1.1579	0.2404	0.5157
GO_REGULATION_OF_CELL_CYCLE_ARREST	0.9615	0.5236	0.8437	1.1109	0.3144	0.5909	0.8554	0.7045	0.9781	1.5902	0.0162	0.1083	-0.5099	1	0.997	0.7578	0.8905	0.9944	1.1818	0.2103	0.4887
GO_REGULATION_OF_CYTOPLASMIC_TRANSLATION	1.0209	0.4306	0.7632	1.1107	0.3353	0.5903	1.3723	0.1135	0.2665	0.5497	0.9698	1	0.9995	0.4874	0.7737	0.9073	0.5783	0.9088	1.1542	0.2822	0.5213
GO_POSITIVE_REGULATION_OF_CELLULAR_AMIDE_METABOLIC_PROCESS	1.1437	0.2396	0.5776	1.1076	0.2806	0.5968	1.1641	0.2143	0.5193	1.1727	0.2017	0.5938	-0.7823	0.8405	0.9003	1.0018	0.4516	0.7865	0.693	0.9489	1
GO_PURINE_CONTAINING_COMPOUND_BIOSYNTHETIC_PROCESS	1.1286	0.2398	0.6027	1.1059	0.2907	0.5998	1.2814	0.095	0.3666	1.085	0.3097	0.7092	0.8651	0.7519	0.9221	1.2917	0.0924	0.3659	-0.5651	0.9952	0.9931
GO_POSITIVE_REGULATION_OF_MULTI_ORGANISM_PROCESS	1.0201	0.4123	0.764	1.1058	0.2816	0.599	0.7552	0.9316	1	1.1139	0.2795	0.6738	0.9192	0.6347	0.8718	0.9905	0.4657	0.8052	1.317	0.0771	0.3242
GO_MULTI_ORGANISM_REPRODUCTIVE_PROCESS	1.1434	0.173	0.5772	1.1036	0.2205	0.6031	1.1281	0.2013	0.5798	1.0706	0.2955	0.7268	1.0443	0.3007	0.7094	1.1294	0.1876	0.5936	1.3126	0.028	0.3295
GO_CIRCADIAN_RHYTHM	1.1147	0.2833	0.6195	1.1023	0.2754	0.6053	0.8833	0.6419	0.9495	1.2944	0.1164	0.4115	1.1474	0.2391	0.5627	1.109	0.3048	0.6192	1.2803	0.1338	0.3644
GO_ORGANIC_CATION_TRANSPORT	1.1652	0.2805	0.543	1.1001	0.3576	0.6095	1.3293	0.1361	0.3083	-0.8926	0.5794	0.8539	1.2887	0.1714	0.3823	1.2485	0.1984	0.4188
GO_POSITIVE_REGULATION_OF_TRANSLATIONAL_INITIATION	1.036	0.418	0.7463	1.0991	0.3308	0.6109	1.1919	0.2291	0.4794	0.7952	0.7306	1	0.9041	0.5606	0.8865	1.101	0.3195	0.6296	1.1763	0.2425	0.493
GO_SULFUR_COMPOUND_METABOLIC_PROCESS	1.1206	0.2603	0.6101	1.0987	0.298	0.611	1.0796	0.3158	0.6615	0.7497	0.9023	1	1.0762	0.2892	0.6675	1.2962	0.087	0.3601	-0.9229	0.598	0.7301
GO_PEROXISOME_ORGANIZATION	1.1963	0.2128	0.4942	1.0961	0.3308	0.6161	1.0963	0.3188	0.6353	-0.9787	0.5245	0.7451	1.0084	0.426	0.7625	1.1408	0.2615	0.5804	1.3213	0.1537	0.3193
GO_VIRAL_LATENCY	1.1223	0.3437	0.609	1.096	0.3708	0.6154	1.1508	0.2892	0.5406	0.9358	0.5741	0.9061	-0.5165	0.9742	0.9974	1.252	0.2166	0.4147	1.2387	0.2495	0.4101
GO_CELLULAR_RESPONSE_TO_GAMMA_RADIATION	1.0383	0.4135	0.7421	1.0951	0.3397	0.6164	0.8523	0.6699	0.9818	1.2468	0.2045	0.4716	0.9265	0.5288	0.8635	0.956	0.5089	0.8509	0.9834	0.4756	0.7672
GO_MULTICELLULAR_ORGANISM_GROWTH	0.9604	0.5036	0.8445	1.0949	0.3135	0.616	1.1974	0.1981	0.4722	1.1642	0.2216	0.6062	1.247	0.1576	0.4386	1.0188	0.4302	0.7625	1.114	0.3056	0.5795
GO_PROTEIN_QUALITY_CONTROL_FOR_MISFOLDED_OR_INCOMPLETELY_SYNTHESIZED_PROTEINS	0.9585	0.4813	0.846	1.0944	0.3241	0.6162	1.0967	0.3386	0.6352	1.0552	0.4209	0.7516	0.8533	0.6632	0.9254	0.9354	0.5331	0.8705	-0.5474	0.9704	0.9947
GO_REGULATION_OF_HISTONE_METHYLATION	1.0717	0.3723	0.692	1.0923	0.3392	0.6202	1.4462	0.0789	0.1926	0.9592	0.5149	0.8652	1.2975	0.1667	0.3721	1.1188	0.3253	0.6071	1.2538	0.1991	0.3899
GO_POSITIVE_REGULATION_OF_REPRODUCTIVE_PROCESS	1.1076	0.3156	0.63	1.0921	0.3426	0.6199	1.2278	0.2087	0.4253	1.0207	0.4133	0.7931	0.8511	0.6667	0.9269	1.1633	0.2505	0.5474	1.2928	0.1472	0.3525
GO_ANAPHASE_PROMOTING_COMPLEX_DEPENDENT_CATABOLIC_PROCESS	1.0006	0.4446	0.7895	1.0905	0.3197	0.6227	1.1751	0.2495	0.5083	-0.9419	0.5587	0.7907	0.9736	0.4649	0.8046	0.6333	0.9273	1	1.1993	0.1856	0.4651
GO_APICAL_JUNCTION_ASSEMBLY	1.0514	0.3862	0.7228	1.0862	0.3375	0.6318	-0.8069	0.7685	0.8799	0.9351	0.548	0.906	1.1942	0.2005	0.5013	1.0801	0.3485	0.6617	1.1812	0.2172	0.4889
GO_PURINE_NUCLEOTIDE_TRANSPORT	1.2166	0.2533	0.4614	1.0857	0.3529	0.6311	1.2583	0.2043	0.3914	1.0612	0.4012	0.7432	1.2333	0.2277	0.4562	1.2348	0.2405	0.4349
GO_INNER_CELL_MASS_CELL_PROLIFERATION	1.1013	0.3602	0.6392	1.0857	0.3909	0.632	1.0439	0.4139	0.7153	1.2612	0.1849	0.4501	1.0958	0.359	0.6429	0.9453	0.5315	0.8633	1.2019	0.2593	0.4628
GO_SOMITE_DEVELOPMENT	1.0057	0.4355	0.7844	1.0849	0.3599	0.632	0.6357	0.9274	1	1.0636	0.368	0.7386	0.6261	0.9467	1	0.9895	0.4723	0.8068	1.1603	0.2628	0.5136
GO_LUNG_EPITHELIUM_DEVELOPMENT	1.112	0.3365	0.6241	1.0837	0.3603	0.6341	0.8936	0.5669	0.94	1.0458	0.4004	0.765	1.0304	0.416	0.7278	1.0624	0.3755	0.6873	1.2506	0.2004	0.3937
GO_ALPHA_AMINO_ACID_BIOSYNTHETIC_PROCESS	0.9785	0.4508	0.8173	1.0833	0.3309	0.6341	1.1086	0.3132	0.6161	1.257	0.1703	0.4548	0.997	0.4463	0.775	0.9694	0.5009	0.829	0.484	0.9977	1
GO_DICARBOXYLIC_ACID_METABOLIC_PROCESS	1.0916	0.3415	0.6552	1.0802	0.3307	0.6405	1.0411	0.3966	0.7204	0.5786	0.9843	1	1.2227	0.1696	0.4703	1.3386	0.0945	0.3108	-1.2696	0.2116	0.2995
GO_PRODUCTION_OF_SMALL_RNA_INVOLVED_IN_GENE_SILENCING_BY_RNA	1.1161	0.2844	0.6182	1.08	0.3482	0.64	1.3236	0.1231	0.3153	1.2953	0.1499	0.4104	1.0047	0.4354	0.7686	1.1631	0.2323	0.5469	1.0994	0.3293	0.6006
GO_NEGATIVE_REGULATION_OF_MICROTUBULE_POLYMERIZATION_OR_DEPOLYMERIZATION	1.3999	0.0968	0.2433	1.077	0.3693	0.6464	0.7284	0.8272	1	0.7244	0.786	1	0.9619	0.5162	0.8219	1.396	0.114	0.25	1.4716	0.0749	0.1794
GO_HISTONE_H3_K27_METHYLATION	0.9168	0.5771	0.8924	1.0769	0.3992	0.6457	1.2694	0.167	0.3761	1.3455	0.1508	0.3418	0.8916	0.5752	0.9026	0.8654	0.6186	0.935	1.0641	0.3737	0.6451
GO_CELL_CYCLE_PHASE_TRANSITION	1.0171	0.4281	0.7665	1.0762	0.2772	0.6464	1.0832	0.2796	0.6565	1.2709	0.0689	0.4371	-0.8836	0.7527	0.7917	-0.8104	0.9174	0.8618	1.3102	0.0261	0.3318
GO_PROTEASOMAL_UBIQUITIN_INDEPENDENT_PROTEIN_CATABOLIC_PROCESS	0.9567	0.5136	0.8456	1.0759	0.3874	0.646	1.0755	0.3757	0.6655	-0.8797	0.5806	0.8691	1.3826	0.126	0.2696	0.8957	0.605	0.9126	1.1183	0.3176	0.5733
GO_PURINE_CONTAINING_COMPOUND_METABOLIC_PROCESS	1.1186	0.2666	0.6141	1.075	0.3234	0.6472	1.0679	0.3381	0.6784	0.7704	0.8836	1	1.0867	0.2637	0.6577	1.2314	0.1449	0.4391	-0.613	0.9687	0.9886
GO_ANIMAL_ORGAN_REGENERATION	0.9636	0.5127	0.8402	1.0748	0.3592	0.6468	1.0892	0.3396	0.6477	1.4112	0.0636	0.2692	0.881	0.6753	0.9114	0.8145	0.7387	0.9674	0.9618	0.485	0.7912
GO_ZINC_ION_HOMEOSTASIS	1.0177	0.4568	0.7659	1.0724	0.4098	0.6518	1.795	0.0018	0.0217	-0.6914	0.8543	0.9811	1.0755	0.3969	0.6673	1.0646	0.3902	0.687
GO_PROTEIN_LOCALIZATION_TO_KINETOCHORE	0.9923	0.461	0.804	1.0708	0.4058	0.6545	1.3979	0.0904	0.2357	1.122	0.336	0.6627	1.0301	0.4391	0.7275	0.9498	0.5361	0.8551	1.0913	0.3808	0.6112
GO_SOMITOGENESIS	0.9264	0.5701	0.8825	1.07	0.3772	0.6556	0.4716	0.9905	1	0.8522	0.6575	0.9973	-0.5332	0.9798	0.9956	0.9745	0.4971	0.8211	1.0186	0.4439	0.708
GO_REGULATION_OF_DNA_BINDING	1.0046	0.4595	0.7851	1.0693	0.3464	0.6561	1.0973	0.3221	0.6349	0.764	0.8229	1	0.8613	0.6854	0.9235	1.0274	0.408	0.7478	1.2804	0.133	0.3649
GO_N_TERMINAL_PROTEIN_AMINO_ACID_MODIFICATION	1.0592	0.3718	0.7112	1.0689	0.3712	0.6563	1.2801	0.1602	0.3666	0.857	0.6241	0.9921	1.1363	0.2685	0.5786	0.9935	0.4498	0.8007	1.1956	0.2289	0.4702
GO_NEGATIVE_REGULATION_OF_CHROMATIN_ORGANIZATION	1.1236	0.3113	0.6079	1.0676	0.362	0.6585	1.2278	0.2034	0.4259	1.1213	0.2719	0.6603	1.1539	0.2753	0.5517	1.1132	0.3308	0.6159	1.1616	0.2423	0.513
GO_NEGATIVE_REGULATION_OF_INCLUSION_BODY_ASSEMBLY	1.1247	0.3411	0.6082	1.0658	0.4144	0.662	-0.5917	0.9341	0.9931	0.8343	0.6775	1	0.818	0.6967	0.9528	1.2208	0.2311	0.4554	1.2381	0.2293	0.4102
GO_NEGATIVE_REGULATION_OF_PROTEASOMAL_UBIQUITIN_DEPENDENT_PROTEIN_CATABOLIC_PROCESS	0.9898	0.4492	0.8009	1.0656	0.3755	0.6614	1.1671	0.2698	0.517	-0.548	0.9732	0.9987	0.971	0.5074	0.807	0.8278	0.6877	0.9606	1.446	0.0903	0.2011
GO_REGULATION_OF_CELL_CYCLE_PROCESS	1.0383	0.3527	0.743	1.0649	0.3115	0.662	0.9814	0.5199	0.8122	1.2662	0.0547	0.4436	-0.7563	0.9723	0.9201	0.8396	0.8735	0.9549	1.2528	0.0463	0.3906
GO_NEGATIVE_REGULATION_OF_CELL_CYCLE_G2_M_PHASE_TRANSITION	1.0166	0.4316	0.7667	1.0648	0.3463	0.6613	1.021	0.4234	0.7514	1.0005	0.4581	0.8126	1.2033	0.1802	0.4929	0.8947	0.6138	0.9129	1.2344	0.1605	0.4141
GO_MALE_SEX_DIFFERENTIATION	0.9075	0.6066	0.9007	1.0639	0.3502	0.6625	1.014	0.4228	0.7588	0.9462	0.5499	0.8829	0.9982	0.4394	0.774	0.8376	0.733	0.9558	0.9664	0.4988	0.7832
GO_REGULATION_OF_GLIAL_CELL_DIFFERENTIATION	1.1433	0.2855	0.5764	1.0613	0.3547	0.668	1.444	0.0655	0.1942	1.1452	0.2914	0.6308	1.0002	0.4627	0.774	1.1392	0.2908	0.5823	1.2358	0.1876	0.4134
GO_POSITIVE_REGULATION_OF_TELOMERE_MAINTENANCE_VIA_TELOMERE_LENGTHENING	1.0393	0.414	0.7426	1.0584	0.3858	0.674	0.8403	0.6641	0.995	0.848	0.6741	0.9998	1.2281	0.2301	0.4631	1.0333	0.4289	0.7389	1.1766	0.2571	0.4933
GO_REGULATION_OF_PEPTIDYL_LYSINE_ACETYLATION	1.134	0.3	0.5927	1.058	0.3702	0.6741	1.2069	0.2133	0.4593	1.0209	0.4218	0.7945	0.9864	0.4867	0.7876	1.0842	0.3451	0.6574	1.2657	0.148	0.3779
GO_BIOTIN_METABOLIC_PROCESS	0.9612	0.5251	0.8434	1.0578	0.3989	0.6735	0.9598	0.5056	0.8573	-0.5257	0.9811	0.9989	1.1665	0.2775	0.5365	1.0541	0.4224	0.7011
GO_REGULATION_OF_MESENCHYMAL_CELL_PROLIFERATION	0.9692	0.5029	0.8364	1.0559	0.4027	0.6773	0.8141	0.701	1	1.1655	0.2959	0.605	1.1826	0.2823	0.5157	1.0242	0.4527	0.754	1.0434	0.3941	0.6703
GO_G2_DNA_DAMAGE_CHECKPOINT	1.1604	0.3047	0.5493	1.0526	0.3699	0.6845	1.3131	0.1467	0.3291	1.5348	0.0474	0.1475	0.7284	0.8009	0.9973	1.0666	0.3911	0.6851	1.306	0.1868	0.3369
GO_REGULATION_OF_OLIGODENDROCYTE_DIFFERENTIATION	1.0626	0.3892	0.7098	1.0513	0.3935	0.6867	1.363	0.1188	0.2761	1.0972	0.3436	0.6956	0.9163	0.5499	0.8769	1.0904	0.3406	0.6473	1.167	0.2717	0.507
GO_MESENCHYMAL_CELL_PROLIFERATION	0.9534	0.5226	0.8466	1.0481	0.4008	0.6937	0.8332	0.6603	0.9991	1.166	0.2964	0.6048	1.2092	0.266	0.4897	1.0349	0.448	0.7367	1.0281	0.4289	0.6939
GO_REGULATION_OF_VIRAL_INDUCED_CYTOPLASMIC_PATTERN_RECOGNITION_RECEPTOR_SIGNALING_PATHWAY	0.9114	0.5361	0.8954	1.0476	0.414	0.6938	1.3667	0.121	0.2725	1.2211	0.229	0.5131	0.9985	0.4598	0.7754	0.7599	0.7686	0.9951	0.8959	0.6047	0.865
GO_POSITIVE_REGULATION_OF_GLIAL_CELL_DIFFERENTIATION	1.0543	0.3797	0.7217	1.0446	0.3962	0.7001	1.3347	0.1315	0.3036	1.1068	0.3358	0.6842	0.856	0.6505	0.9218	1.0618	0.3842	0.6878	1.1852	0.2577	0.4859
GO_REGULATION_OF_POSTSYNAPTIC_MEMBRANE_ORGANIZATION	1.0988	0.3532	0.6423	1.0426	0.4307	0.7045	0.889	0.6125	0.9435	1.3502	0.1481	0.3354	1.1054	0.3506	0.6282	1.0829	0.3892	0.6597	1.0979	0.3722	0.6019
GO_POSITIVE_REGULATION_OF_POSTTRANSCRIPTIONAL_GENE_SILENCING	1.2251	0.2235	0.4466	1.042	0.4369	0.705	1.0557	0.3857	0.6967	1.4651	0.0788	0.2134	0.7786	0.7306	0.9777	1.2882	0.1523	0.3694	1.2856	0.1774	0.3608
GO_REGULATION_OF_PROTEIN_LOCALIZATION_TO_NUCLEUS	1.1935	0.2	0.4984	1.0409	0.3804	0.7066	0.7606	0.8804	1	1.1135	0.2924	0.6729	1.1267	0.263	0.5948	1.13	0.2402	0.5943	1.4501	0.0397	0.1987
GO_PROTEIN_PEPTIDYL_PROLYL_ISOMERIZATION	1.1017	0.3291	0.6392	1.039	0.4033	0.7102	1.1936	0.2124	0.4766	1.1149	0.3035	0.6731	1.3644	0.085	0.2914	0.9704	0.5019	0.8276	1.1799	0.235	0.4896
GO_PEPTIDYL_PROLINE_MODIFICATION	1.0407	0.39	0.7403	1.0381	0.3869	0.7115	1.0902	0.3186	0.6474	1.324	0.1261	0.3714	1.2022	0.2013	0.4945	0.9018	0.612	0.9128	1.23	0.1704	0.4193
GO_PEROXISOMAL_TRANSPORT	1.0989	0.3174	0.6431	1.0374	0.3786	0.7123	1.0894	0.3339	0.6484	-1.0715	0.3513	0.6406	0.8811	0.6317	0.9123	1.0534	0.361	0.7017	1.3234	0.1473	0.317
GO_COFACTOR_BIOSYNTHETIC_PROCESS	1.0229	0.4253	0.7643	1.037	0.3773	0.7122	1.0625	0.3238	0.6857	0.7142	0.9676	1	0.8602	0.7852	0.9239	1.2815	0.0719	0.3753	-1.3095	0.1002	0.2618
GO_MITOTIC_G2_DNA_DAMAGE_CHECKPOINT	1.1022	0.336	0.639	1.0353	0.4227	0.7153	1.105	0.3502	0.6218	1.2844	0.1762	0.4229	0.8126	0.704	0.9559	1.132	0.32	0.5943	1.2248	0.208	0.4277
GO_STEROL_BIOSYNTHETIC_PROCESS	1.1446	0.2555	0.5793	1.0342	0.3929	0.7172	0.8952	0.6381	0.9371	0.5015	0.9963	1	1.031	0.3991	0.7272	1.0232	0.4186	0.7555	1.3699	0.0909	0.2728
GO_NUCLEOBASE_CONTAINING_SMALL_MOLECULE_METABOLIC_PROCESS	0.9858	0.4759	0.8068	1.0342	0.3589	0.7163	0.8662	0.7816	0.9668	0.7911	0.9061	1	1.0278	0.3593	0.7322	1.0945	0.2669	0.6394	-0.7404	0.9248	0.9322
GO_TELOMERE_CAPPING	0.9535	0.5046	0.8484	1.0317	0.4049	0.7215	0.9856	0.498	0.8053	1.0515	0.403	0.7544	1.0811	0.3606	0.6629	1.0423	0.3988	0.7221	1.0783	0.3696	0.6271
GO_REGULATION_OF_DEOXYRIBONUCLEASE_ACTIVITY	1.0235	0.4618	0.7659	1.0312	0.4151	0.7218	1.0027	0.4671	0.7799	0.9131	0.5656	0.9267	0.6914	0.8725	1	0.9825	0.49	0.8142	1.1092	0.3383	0.5861
GO_EXOCRINE_SYSTEM_DEVELOPMENT	0.9447	0.5439	0.8606	1.0304	0.4289	0.7227	0.6742	0.8741	1	1.2373	0.2043	0.4872	1.1004	0.3514	0.6361	0.8709	0.6411	0.9351	1.0399	0.4	0.6742
GO_WALKING_BEHAVIOR	1.0633	0.3686	0.7093	1.0303	0.3996	0.7219	0.9306	0.56	0.8915	1.5006	0.0746	0.1754	0.9977	0.4531	0.7743	1.0624	0.374	0.6883	0.7922	0.7517	0.9658
GO_PROTEIN_LOCALIZATION_TO_CYTOSKELETON	1.189	0.2473	0.5039	1.0298	0.409	0.722	-0.5061	0.9897	1	1.6814	0.0169	0.0607	0.825	0.7271	0.9462	1.3459	0.1289	0.3027	1.3896	0.0805	0.254
GO_CYTOPLASMIC_PATTERN_RECOGNITION_RECEPTOR_SIGNALING_PATHWAY_IN_RESPONSE_TO_VIRUS	0.8512	0.6467	0.9647	1.0288	0.4316	0.7235	1.2803	0.1673	0.367	1.2373	0.2326	0.488	0.9487	0.5195	0.8405	0.6924	0.8632	0.9976	0.8679	0.6338	0.8997
GO_RESPONSE_TO_TEMPERATURE_STIMULUS	1.0473	0.3833	0.7292	1.0282	0.3873	0.7242	0.9478	0.5911	0.8734	0.8502	0.7613	0.999	0.8693	0.7601	0.9191	1.013	0.4185	0.7723	1.0511	0.3245	0.6616
GO_PEPTIDYL_METHIONINE_MODIFICATION	0.8556	0.6226	0.9644	1.0269	0.4241	0.7264	1.4162	0.097	0.2174	0.5429	0.9698	1	1.2054	0.2663	0.4915	0.7231	0.811	1	0.9948	0.4565	0.7502
GO_N_TERMINAL_PEPTIDYL_METHIONINE_ACETYLATION	0.8848	0.5872	0.9281	1.0264	0.4361	0.7267	1.1966	0.2587	0.4722	0.5508	0.9591	1	1.0638	0.4	0.6869	0.7319	0.8171	0.997	0.9949	0.4685	0.751
GO_REGULATION_OF_CARBOHYDRATE_CATABOLIC_PROCESS	0.9045	0.6004	0.9047	1.0247	0.413	0.7302	1.0486	0.381	0.7063	0.6782	0.8899	1	1.0571	0.3821	0.6919	0.948	0.5475	0.8586	0.9686	0.5126	0.7813
GO_SIGNAL_TRANSDUCTION_INVOLVED_IN_CELL_CYCLE_CHECKPOINT	0.8232	0.7368	0.9888	1.023	0.4137	0.7333	1.0751	0.3454	0.6655	1.3128	0.1305	0.3893	-0.5055	0.9928	0.9964	0.5302	0.9902	0.9968	1.0742	0.3443	0.6311
GO_REGULATION_OF_VIRAL_TRANSCRIPTION	1.0073	0.4426	0.7835	1.0222	0.4084	0.7342	1.2126	0.1876	0.4495	1.1007	0.331	0.6925	0.9772	0.4955	0.8006	1.0299	0.3993	0.7433	1.1616	0.2306	0.512
GO_ESTABLISHMENT_OR_MAINTENANCE_OF_TRANSMEMBRANE_ELECTROCHEMICAL_GRADIENT	1.0154	0.4607	0.7664	1.0201	0.4614	0.7386	0.8172	0.7027	1	1.0264	0.4232	0.7906	1.3849	0.1077	0.2681	0.9819	0.4686	0.8147
GO_REGULATION_OF_MEMBRANE_PERMEABILITY	0.9223	0.5982	0.8852	1.0196	0.4142	0.7387	0.6426	0.9562	1	0.8886	0.6499	0.9638	0.7861	0.8294	0.9684	1.0049	0.4598	0.7837	-0.6639	0.9347	0.9737
GO_RESPONSE_TO_LEUKEMIA_INHIBITORY_FACTOR	0.9014	0.6187	0.9072	1.0192	0.414	0.7387	1.0637	0.3863	0.6848	0.8958	0.6135	0.9507	0.9932	0.4645	0.7806	0.8176	0.729	0.9674	1.0917	0.3158	0.6125
GO_PHOTORECEPTOR_CELL_DIFFERENTIATION	1.1214	0.3461	0.6092	1.0176	0.4491	0.7418	0.7983	0.7337	1	0.79	0.7354	1	1.0846	0.3623	0.6587	1.0696	0.3924	0.6806	1.1821	0.2289	0.4891
GO_CELLULAR_AMINO_ACID_CATABOLIC_PROCESS	0.987	0.5	0.8058	1.0156	0.425	0.7458	1.0721	0.3455	0.6719	-0.9488	0.5367	0.7804	1.2772	0.131	0.3986	1.2978	0.1226	0.3581	-1.2904	0.1978	0.2784
GO_APPENDAGE_MORPHOGENESIS	0.993	0.476	0.8042	1.0139	0.4188	0.749	0.9525	0.5103	0.8734	1.0343	0.4157	0.7822	1.0242	0.4063	0.7393	1.0279	0.4174	0.7475	1.2917	0.1253	0.3534
GO_VIRAL_RNA_GENOME_REPLICATION	1.0626	0.3759	0.7087	1.0138	0.4358	0.7482	1.1663	0.2645	0.5171	1.0314	0.3927	0.7839	-0.8698	0.6267	0.8094	1.0196	0.4565	0.7626	1.2321	0.2124	0.4166
GO_PROTEIN_MODIFICATION_BY_SMALL_PROTEIN_CONJUGATION	1.0379	0.3687	0.7422	1.0087	0.4266	0.7602	0.8035	0.9562	1	0.9199	0.6907	0.9191	0.8808	0.8509	0.9108	0.9265	0.6828	0.8823	1.3416	0.0211	0.2996
GO_REGULATION_OF_FIBROBLAST_GROWTH_FACTOR_RECEPTOR_SIGNALING_PATHWAY	0.8428	0.6376	0.9734	1.006	0.4643	0.7662	0.8068	0.717	1	1.1137	0.3542	0.6735	1.2268	0.2399	0.4648	0.9264	0.5494	0.8806	0.907	0.588	0.8537
GO_CELLULAR_RESPONSE_TO_IONIZING_RADIATION	1.0858	0.3358	0.6667	1.005	0.4259	0.7678	0.7702	0.8243	1	1.4125	0.0805	0.2679	0.921	0.5779	0.8684	0.9118	0.5693	0.9043	1.1107	0.2821	0.5847
GO_CELLULAR_LIPID_BIOSYNTHETIC_PROCESS	0.9825	0.4727	0.8134	1.0033	0.4493	0.7712	1.0811	0.367	0.6597	-0.6824	0.8433	0.9869	1.2601	0.1898	0.4244	0.8474	0.6772	0.9466
GO_NUCLEOTIDE_PHOSPHORYLATION	0.9479	0.524	0.8545	1.0014	0.462	0.7751	0.7312	0.8031	1	0.7831	0.7572	1	-0.6105	0.9231	0.9841	1.103	0.3748	0.6295
GO_PROTEIN_TARGETING	1.0233	0.3907	0.7653	1.0007	0.4392	0.7757	1.1832	0.1241	0.4927	-1.3664	0.014	0.3665	-0.7222	0.9913	0.9409	1.0768	0.2801	0.6667	-1.0481	0.3521	0.5747
GO_NUCLEOSIDE_PHOSPHATE_METABOLIC_PROCESS	1.0508	0.338	0.7232	0.9999	0.4323	0.7767	1.0222	0.392	0.7504	0.7474	0.9292	1	1.0235	0.3956	0.7401	1.2182	0.1163	0.459	-0.7434	0.9029	0.9297
GO_POSTSYNAPTIC_SPECIALIZATION_ORGANIZATION	0.9313	0.5556	0.8798	0.9988	0.4845	0.7785	0.7859	0.7536	1	0.8153	0.6991	1	1.407	0.0887	0.2511	0.9738	0.506	0.8209	1.0574	0.405	0.6545
GO_POSITIVE_REGULATION_OF_LEUKOCYTE_MEDIATED_IMMUNITY	1.0622	0.3542	0.7086	0.9968	0.4677	0.7825	1.2339	0.1429	0.4203	1.5562	0.0233	0.13	-1.1055	0.2968	0.4761	0.9528	0.5152	0.8536	-0.8756	0.6549	0.7943
GO_REGULATION_OF_TELOMERE_CAPPING	1.0166	0.4415	0.7657	0.9962	0.4627	0.7831	0.8682	0.624	0.9644	1.075	0.3551	0.7193	1.1768	0.2695	0.5245	1.1048	0.3327	0.6262	1.1495	0.2876	0.527
GO_REGULATION_OF_VENTRICULAR_CARDIAC_MUSCLE_CELL_ACTION_POTENTIAL	0.9552	0.4797	0.8462	0.9962	0.4783	0.7821	0.9968	0.4798	0.7877	-1.2331	0.2039	0.4725	0.8077	0.7006	0.9579	0.955	0.5178	0.8502	1.0655	0.3755	0.6429
GO_REGULATION_OF_EXTRINSIC_APOPTOTIC_SIGNALING_PATHWAY_IN_ABSENCE_OF_LIGAND	1.048	0.3767	0.7283	0.9961	0.4672	0.7812	0.676	0.8536	1	-0.6715	0.8594	0.9923	0.8705	0.6373	0.9186	1.2015	0.2315	0.4853	-0.6415	0.9156	0.9822
GO_RNA_CATABOLIC_PROCESS	1.0835	0.2669	0.6704	0.9947	0.4586	0.7837	1.0068	0.4337	0.7714	-0.8881	0.7646	0.8597	0.929	0.643	0.8635	1.0312	0.3891	0.742	0.9915	0.4676	0.7528
GO_DEVELOPMENTAL_PROCESS_INVOLVED_IN_REPRODUCTION	0.9223	0.6267	0.8863	0.9934	0.437	0.786	0.8094	0.8952	1	0.9195	0.6425	0.9183	0.9714	0.544	0.808	0.846	0.8279	0.9454	0.9462	0.5913	0.8159
GO_FATTY_ACID_TRANSMEMBRANE_TRANSPORT	1.098	0.3295	0.6422	0.9924	0.448	0.7873	1.0148	0.4291	0.759	1.2631	0.2022	0.4486	1.2353	0.2188	0.4531	1.0811	0.3709	0.6621
GO_REGULATION_OF_PROTEIN_POLYUBIQUITINATION	0.9749	0.4903	0.8258	0.9923	0.477	0.7867	-1.1909	0.2547	0.3582	1.0083	0.457	0.8006	0.8752	0.6304	0.9161	0.9042	0.5742	0.9153	1.0019	0.4569	0.738
GO_SMALL_RNA_LOADING_ONTO_RISC	1.1437	0.2931	0.5785	0.992	0.4695	0.7863	0.5913	0.9176	1	0.9468	0.526	0.8822	0.7322	0.8156	0.9981	1.1296	0.3378	0.5942	1.2576	0.2023	0.3866
GO_REGULATION_OF_EMBRYONIC_DEVELOPMENT	0.7729	0.822	1	0.9917	0.4399	0.7861	0.8984	0.6224	0.9325	-0.7988	0.7884	0.9413	-0.99	0.4785	0.6378	-0.6675	0.9342	0.9626	0.883	0.6692	0.8878
GO_REGULATION_OF_DNA_TEMPLATED_TRANSCRIPTION_INITIATION	0.8021	0.7403	1	0.9906	0.4627	0.7878	0.936	0.5541	0.8864	1.3	0.1361	0.4042	-0.7114	0.844	0.9473	0.8286	0.6838	0.9609	0.9207	0.5622	0.8496
GO_APOPTOTIC_MITOCHONDRIAL_CHANGES	0.9908	0.459	0.8003	0.9902	0.4575	0.7877	0.5973	0.9962	1	1.261	0.1414	0.4497	0.871	0.7165	0.9194	1.1189	0.2429	0.6079	-0.9179	0.6062	0.7362
GO_COFACTOR_METABOLIC_PROCESS	1.0231	0.3906	0.7649	0.9887	0.5077	0.7905	0.9521	0.5775	0.8734	-0.6493	1	0.9986	1.0012	0.4496	0.7736	1.2011	0.1237	0.4836	-1.2061	0.1476	0.3668
GO_POSITIVE_REGULATION_OF_TELOMERE_MAINTENANCE	1.0867	0.3545	0.6653	0.9876	0.4789	0.7922	0.7992	0.7369	1	0.9229	0.5288	0.9184	1.157	0.2821	0.5517	1.0351	0.4185	0.7372	1.2045	0.2238	0.4588
GO_VIRAL_GENOME_REPLICATION	0.9135	0.6246	0.8931	0.9872	0.4947	0.7923	-1.1175	0.2674	0.4453	1.008	0.4303	0.8004	-1.0936	0.2912	0.4918	-0.8913	0.6667	0.7695	1.1665	0.2084	0.5061
GO_CERAMIDE_BIOSYNTHETIC_PROCESS	1.1056	0.3189	0.6327	0.987	0.4695	0.7918	1.2473	0.1915	0.4037	0.6586	0.8924	1	1.3918	0.1113	0.2654	1.0698	0.374	0.6811	0.813	0.6947	0.9556
GO_SYNAPSE_ASSEMBLY	0.9312	0.5671	0.8789	0.985	0.4471	0.796	1.2772	0.148	0.3696	1.1143	0.3047	0.6738	1.3208	0.1404	0.3443	1.0374	0.3894	0.7333	1.0883	0.3372	0.6138
GO_CELL_DIFFERENTIATION_INVOLVED_IN_EMBRYONIC_PLACENTA_DEVELOPMENT	1.083	0.3615	0.6705	0.984	0.4874	0.7975	-0.8985	0.6	0.765	0.8379	0.6709	1	-0.7962	0.7268	0.8884	1.0653	0.4141	0.6872	1.1185	0.3431	0.5739
GO_POSITIVE_REGULATION_OF_PRODUCTION_OF_MOLECULAR_MEDIATOR_OF_IMMUNE_RESPONSE	1.0154	0.4192	0.7675	0.9817	0.4673	0.8022	1.2066	0.2084	0.4591	1.3253	0.1209	0.3699	-1.1474	0.2652	0.4252	0.898	0.6049	0.9103	-0.8058	0.7328	0.8727
GO_POSITIVE_REGULATION_OF_LONG_TERM_SYNAPTIC_POTENTIATION	1.0872	0.3652	0.6652	0.9814	0.4742	0.802	0.6448	0.8946	1	1.1431	0.2844	0.6332	0.8291	0.666	0.9432	1.1732	0.2544	0.528	1.1655	0.2586	0.5071
[truncated: 3,238 more rows]

## Sheet: D_CPTAC_RNA_GSEA
table 4D: GSEA using RNA ranked based on aneuploidy coefficient of the linear model: RNA ~ Aneuploidy score + other variable
[truncated: 3,961 more rows]
